# Supplementary material
Source: PubMed Central journal article supplement (PMC3521791)
Supplement: 12_230_Reynier.Suppl.pdf [file 12_230_Reynier.Suppl.pdf]

Supplemental Data

Gene Expression Profiles in Alveolar Macrophages Induced by Lipopolysaccharide in Humans

Frederic Reynier,<sup>1</sup> Alex F de Vos,<sup>2,3</sup> Jacobien J Hoogerwerf,<sup>2,3</sup> Paul Bresser,<sup>4</sup> Jaring S van der Zee,<sup>4</sup> Malick Paye,<sup>1</sup> Alexandre Pachot,<sup>1</sup> Bruno Mougin,<sup>1</sup> and Tom van der Poll<sup>2,3</sup>

Online address: <http://www.molmed.org>

The Feinstein Institute for Medical Research North Shore LIJ

Supplementary Table S1.

| ID           | Gene Symbol | p-value  | VW3_Saline | VW6_Saline | VW7_Saline | VW13_Saline | VW22_Saline | VW23_Saline | VW25_Saline | VW3_LPS | VW6_LPS | VW7_LPS | VW13_LPS | VW22_LPS | VW23_LPS | VW25_LPS | Median_saline | Median_LPS | Fold change |
|--------------|-------------|----------|------------|------------|------------|-------------|-------------|-------------|-------------|---------|---------|---------|----------|----------|----------|----------|---------------|------------|-------------|
| 203504_s_at  | ABCA1       | 3.81E-03 | 856.6      | 582.9      | 1291.6     | 1255.9      | 1360.6      | 913.2       | 1958.8      | 1072.8  | 952.5   | 2096.5  | 1993.5   | 1702.8   | 1530.9   | 2073.6   | 1255.9        | 1702.8     | 1.4         |
| 203505_at    | ABCA1       | 1.80E-03 | 30.5       | 26.9       | 33.5       | 42.7        | 47.2        | 31.4        | 53.5        | 48.6    | 34.0    | 72.9    | 71.4     | 67.4     | 52.0     | 63.9     | 33.5          | 63.9       | 1.9         |
| 217504_at    | ABCA6       | 1.38E-04 | 24.4       | 23.9       | 20.3       | 27.6        | 19.6        | 24.0        | 25.8        | 38.6    | 65.8    | 120.1   | 88.9     | 63.7     | 66.5     | 86.6     | 24.0          | 66.5       | 2.8         |
| 1569072_s_at | ABCB5       | 3.93E-03 | 89.8       | 59.8       | 51.0       | 59.1        | 61.7        | 27.2        | 93.4        | 106.0   | 172.3   | 275.9   | 106.6    | 91.8     | 99.3     | 172.6    | 59.8          | 106.6      | 1.8         |
| 243167_at    | ABCB5       | 3.61E-03 | 48.0       | 24.9       | 25.6       | 27.7        | 35.7        | 22.1        | 65.0        | 59.1    | 74.9    | 255.7   | 108.5    | 75.4     | 62.9     | 111.4    | 27.7          | 75.4       | 2.7         |
| 209027_s_at  | ABI1        | 9.84E-03 | 988.4      | 786.0      | 1143.8     | 1170.9      | 1396.6      | 1230.6      | 1489.7      | 1396.9  | 1456.0  | 2406.6  | 1701.4   | 1473.6   | 1475.1   | 1779.5   | 1170.9        | 1475.1     | 1.3         |
| 206411_s_at  | ABL2        | 2.72E-04 | 131.5      | 96.4       | 119.0      | 110.7       | 171.4       | 103.3       | 160.9       | 174.8   | 195.3   | 257.2   | 171.2    | 292.0    | 240.0    | 287.4    | 119.0         | 240.0      | 2.0         |
| 226893_at    | ABL2        | 1.29E-03 | 667.4      | 569.4      | 611.9      | 689.6       | 1124.2      | 642.6       | 1104.1      | 958.3   | 1043.6  | 1509.7  | 996.2    | 1430.8   | 1393.2   | 1681.4   | 667.4         | 1393.2     | 2.1         |
| 231907_at    | ABL2        | 1.98E-03 | 141.7      | 113.0      | 193.5      | 192.7       | 291.3       | 151.9       | 294.1       | 223.4   | 198.3   | 455.6   | 264.8    | 318.9    | 272.8    | 469.7    | 192.7         | 272.8      | 1.4         |
| 213497_at    | ABTB2       | 4.55E-05 | 123.5      | 69.2       | 58.7       | 54.6        | 89.0        | 69.4        | 80.5        | 242.3   | 390.6   | 528.4   | 258.4    | 389.9    | 381.5    | 532.4    | 69.4          | 389.9      | 5.6         |
| 221641_s_at  | ACOT9       | 1.05E-04 | 1000.2     | 899.4      | 944.6      | 840.3       | 1163.7      | 970.7       | 1007.5      | 1396.2  | 1664.6  | 1915.7  | 1547.3   | 1786.4   | 1725.5   | 1876.9   | 970.7         | 1725.5     | 1.8         |
| 202767_at    | ACP2        | 1.91E-03 | 220.0      | 136.7      | 177.9      | 190.0       | 194.9       | 143.1       | 203.1       | 329.2   | 142.5   | 302.8   | 373.8    | 388.2    | 347.4    | 319.8    | 190.0         | 329.2      | 1.7         |
| 201963_at    | ACSL1       | 6.46E-03 | 2186.3     | 1256.1     | 2587.0     | 2763.4      | 3056.2      | 1805.5      | 4740.0      | 3026.7  | 3723.7  | 5173.5  | 4733.9   | 3428.9   | 3981.4   | 5356.6   | 2587.0        | 3981.4     | 1.5         |
| 207275_s_at  | ACSL1       | 1.78E-03 | 2703.0     | 1373.7     | 2358.6     | 2221.4      | 3076.3      | 1414.8      | 3721.9      | 3866.1  | 4097.9  | 4499.1  | 4665.2   | 4243.8   | 4592.6   | 5270.9   | 2358.6        | 4499.1     | 1.9         |
| 202422_s_at  | ACSL4       | 1.72E-03 | 125.3      | 112.8      | 198.6      | 254.7       | 250.2       | 242.2       | 326.3       | 201.6   | 296.0   | 582.0   | 438.0    | 350.0    | 341.8    | 484.9    | 242.2         | 350.0      | 1.4         |
| 218322_s_at  | ACSL5       | 3.83E-04 | 517.5      | 353.2      | 502.0      | 545.9       | 740.8       | 533.0       | 624.8       | 732.2   | 648.5   | 1119.8  | 794.2    | 1070.6   | 899.7    | 1028.0   | 533.0         | 899.7      | 1.7         |
| 222592_s_at  | ACSL5       | 4.37E-05 | 408.9      | 221.8      | 371.3      | 401.3       | 505.6       | 327.0       | 516.6       | 814.4   | 955.1   | 1787.0  | 1049.7   | 1382.6   | 1315.6   | 1411.0   | 401.3         | 1315.6     | 3.3         |
| 200720_s_at  | ACTR1A      | 3.68E-03 | 484.1      | 451.0      | 426.5      | 494.6       | 550.6       | 444.4       | 486.9       | 573.1   | 579.2   | 649.9   | 619.9    | 644.3    | 608.5    | 705.9    | 484.1         | 619.9      | 1.3         |
| 205327_s_at  | ACVR2A      | 5.19E-04 | 226.2      | 221.2      | 245.9      | 221.3       | 312.6       | 212.1       | 238.1       | 357.7   | 275.7   | 369.3   | 418.1    | 445.8    | 323.8    | 418.2    | 226.2         | 369.3      | 1.6         |
| 204639_at    | ADA         | 2.42E-06 | 46.1       | 34.3       | 63.9       | 50.7        | 46.7        | 35.3        | 64.2        | 301.4   | 210.5   | 602.4   | 226.9    | 231.5    | 279.0    | 414.2    | 46.7          | 279.0      | 6.0         |
| 216705_s_at  | ADA         | 5.75E-06 | 66.3       | 50.4       | 92.5       | 85.5        | 56.2        | 44.1        | 76.2        | 300.3   | 189.0   | 590.3   | 263.8    | 231.7    | 251.6    | 388.0    | 66.3          | 263.8      | 4.0         |
| 205746_s_at  | ADAM17      | 1.58E-03 | 248.6      | 269.3      | 213.4      | 318.3       | 342.0       | 293.2       | 339.4       | 401.3   | 374.2   | 440.0   | 401.9    | 452.7    | 433.5    | 472.6    | 293.2         | 433.5      | 1.5         |
| 209765_at    | ADAM19      | 1.15E-05 | 136.6      | 108.3      | 76.2       | 168.7       | 159.4       | 65.6        | 140.0       | 595.4   | 387.2   | 622.1   | 668.9    | 1047.8   | 550.3    | 1308.9   | 136.6         | 622.1      | 4.6         |
| 205180_s_at  | ADAM8       | 2.14E-04 | 105.7      | 101.4      | 109.7      | 118.7       | 145.1       | 101.7       | 105.5       | 227.4   | 226.8   | 352.8   | 235.7    | 460.4    | 338.7    | 703.6    | 105.7         | 338.7      | 3.2         |
| 201786_s_at  | ADAR        | 1.78E-03 | 2554.1     | 2716.0     | 2539.5     | 2551.3      | 2439.5      | 2257.9      | 2236.7      | 3128.3  | 3265.4  | 3712.1  | 3377.0   | 3481.7   | 3244.5   | 3712.2   | 2539.5        | 3377.0     | 1.3         |
| 228000_at    | ADC         | 5.95E-03 | 52.2       | 39.8       | 58.3       | 46.2        | 51.2        | 45.6        | 55.9        | 58.9    | 55.2    | 82.8    | 65.8     | 65.5     | 86.5     | 65.0     | 51.2          | 65.5       | 1.3         |
| 202912_at    | ADM         | 1.16E-05 | 80.5       | 40.3       | 82.3       | 36.7        | 125.8       | 32.2        | 114.5       | 365.4   | 814.5   | 1234.2  | 618.6    | 1008.6   | 727.5    | 1013.0   | 80.5          | 814.5      | 10.1        |
| 205013_s_at  | ADORA2A     | 2.65E-06 | 70.1       | 52.2       | 69.4       | 70.7        | 100.1       | 37.6        | 73.9        | 541.7   | 676.3   | 1318.4  | 740.5    | 1402.0   | 1045.2   | 1475.9   | 70.1          | 1045.2     | 14.9        |
|              | /// CYTSA   |          |            |            |            |             |             |             |             |         |         |         |          |          |          |          |               |            |             |
| 223097_at    | ADPRHL2     | 7.38E-04 | 966.3      | 1004.5     | 801.7      | 843.8       | 888.3       | 859.4       | 866.0       | 1205.5  | 1334.3  | 1523.1  | 1210.2   | 1451.7   | 1361.7   | 1419.9   | 866.0         | 1361.7     | 1.6         |
| 210250_x_at  | ADSL        | 6.12E-03 | 582.5      | 482.2      | 520.4      | 555.6       | 549.1       | 534.7       | 601.2       | 663.7   | 654.5   | 743.1   | 642.2    | 711.8    | 800.7    | 708.0    | 549.1         | 708.0      | 1.3         |
| 219723_x_at  | AGPAT3      | 2.22E-03 | 275.2      | 215.4      | 229.5      | 259.5       | 240.2       | 233.1       | 231.8       | 318.0   | 278.0   | 376.6   | 326.7    | 337.6    | 330.6    | 345.8    | 233.1         | 330.6      | 1.4         |
| 224282_s_at  | AGPAT3      | 2.35E-03 | 276.5      | 228.6      | 322.6      | 327.3       | 294.3       | 275.7       | 288.8       | 343.0   | 286.5   | 415.2   | 403.7    | 445.1    | 455.0    | 462.7    | 288.8         | 415.2      | 1.4         |
| 225440_s_at  | AGPAT3      | 9.14E-03 | 540.1      | 516.0      | 462.4      | 565.5       | 560.7       | 460.3       | 469.3       | 646.4   | 554.0   | 653.5   | 649.8    | 693.8    | 662.5    | 705.1    | 516.0         | 653.5      | 1.3         |
| 212285_s_at  | AGRN        | 1.67E-03 | 459.3      | 377.5      | 433.3      | 451.3       | 327.9       | 300.0       | 261.9       | 563.6   | 575.7   | 845.8   | 547.4    | 600.2    | 663.4    | 601.3    | 377.5         | 600.2      | 1.6         |
| 217419_x_at  | AGRN        | 3.31E-04 | 221.4      | 201.9      | 232.0      | 235.5       | 183.9       | 161.9       | 155.9       | 311.8   | 307.3   | 503.8   | 348.0    | 406.2    | 370.6    | 338.0    | 201.9         | 348.0      | 1.7         |
| 220199_s_at  | AIDA        | 1.78E-03 | 168.2      | 147.3      | 228.6      | 216.3       | 217.1       | 248.1       | 225.5       | 258.2   | 286.2   | 492.5   | 323.7    | 290.0    | 293.1    | 332.4    | 217.1         | 293.1      | 1.4         |
| 226801_s_at  | AIDA        | 3.16E-04 | 1325.6     | 1534.1     | 1399.2     | 1260.4      | 1496.6      | 1488.4      | 1372.6      | 2076.2  | 2183.3  | 2417.7  | 1904.0   | 2055.5   | 2022.4   | 2225.4   | 1399.2        | 2076.2     | 1.5         |
| 224461_s_at  | AIFM2       | 4.03E-04 | 108.8      | 49.0       | 83.7       | 101.2       | 92.4        | 56.9        | 93.3        | 153.8   | 129.1   | 365.8   | 190.9    | 245.5    | 224.1    | 217.2    | 92.4          | 217.2      | 2.4         |
| 206513_at    | AIM2        | 7.57E-06 | 369.6      | 400.1      | 303.8      | 259.0       | 387.9       | 215.8       | 242.8       | 794.3   | 1074.7  | 871.4   | 704.5    | 866.1    | 691.9    | 740.1    | 303.8         | 794.3      | 2.6         |
| 208967_s_at  | AK2         | 5.92E-03 | 1397.5     | 1202.1     | 1159.3     | 1230.2      | 1185.3      | 1201.9      | 1053.3      | 1421.8  | 1660.5  | 1815.1  | 1513.4   | 1531.9   | 1670.0   | 1577.2   | 1201.9        | 1577.2     | 1.3         |
| 212173_at    | AK2         | 1.39E-03 | 185.1      | 131.6      | 135.4      | 165.8       | 164.9       | 138.9       | 153.6       | 248.1   | 179.6   | 250.6   | 212.5    | 220.4    | 203.0    | 214.1    | 153.6         | 214.1      | 1.4         |
| 204347_at    | AK3L1       | 1.44E-03 | 56.8       | 48.8       | 43.8       | 55.9        | 60.1        | 22.6        | 60.3        | 107.2   | 73.9    | 87.5    | 92.8     | 99.4     | 102.8    | 133.6    | 55.9          | 99.4       | 1.8         |
| 204348_s_at  | AK3L1       | 4.59E-03 | 79.6       | 52.5       | 38.7       | 37.2        | 30.2        | 32.5        | 59.5        | 72.3    | 84.7    | 66.6    | 54.7     | 50.5     | 53.1     | 86.6     | 38.7          | 66.6       | 1.7         |
| 225342_at    | AK3L1       | 2.03E-04 | 62.9       | 76.3       | 50.0       | 64.7        | 54.5        | 31.7        | 123.7       | 203.6   | 102.9   | 132.8   | 203.0    | 161.1    | 153.7    | 329.1    | 62.9          | 161.1      | 2.6         |

Continued

TRANSCRIPTION PROFILES IN ALVEOLAR MACROPHAGES

Supplementary Table S1. Continued.

| ID           | Gene Symbol           | p-value  | VW3_Saline | VW6_Saline | VW7_Saline | VW13_Saline | VW22_Saline | VW23_Saline | VW25_Saline | VW3_LPS | VW6_LPS | VW7_LPS | VW13_LPS | VW22_LPS | VW23_LPS | VW25_LPS | Median_saline | Median_LPS | Fold change |
|--------------|-----------------------|----------|------------|------------|------------|-------------|-------------|-------------|-------------|---------|---------|---------|----------|----------|----------|----------|---------------|------------|-------------|
| 202759_s_at  | AKAP2 /// PALM2-AKAP2 | 8.85E-05 | 59.3       | 45.2       | 28.3       | 30.8        | 54.8        | 69.0        | 259.3       | 190.0   | 205.5   | 373.8   | 178.7    | 186.7    | 346.5    | 742.6    | 54.8          | 205.5      | 3.7         |
| 226694_at    | AKAP2 /// PALM2-AKAP2 | 5.15E-04 | 94.7       | 23.8       | 28.9       | 50.0        | 84.4        | 109.2       | 546.4       | 299.3   | 437.2   | 665.1   | 278.4    | 291.4    | 663.7    | 1545.0   | 84.4          | 437.2      | 5.2         |
| 222458_s_at  | AKIRIN1               | 1.17E-03 | 204.9      | 185.5      | 249.7      | 239.7       | 240.7       | 216.3       | 253.8       | 285.2   | 255.8   | 357.1   | 285.3    | 337.3    | 306.5    | 333.9    | 239.7         | 306.5      | 1.3         |
| 204151_x_at  | AKR1C1                | 5.57E-03 | 2114.5     | 3094.5     | 933.2      | 2416.9      | 1281.8      | 1035.9      | 1000.2      | 2416.9  | 4691.0  | 4055.2  | 3261.7   | 2194.6   | 2746.3   | 2336.1   | 1281.8        | 2746.3     | 2.1         |
| 216594_x_at  | AKR1C1                | 8.35E-03 | 1524.1     | 1951.6     | 548.5      | 1502.4      | 760.0       | 679.6       | 492.1       | 1729.6  | 2272.0  | 2457.6  | 2129.0   | 1391.9   | 1873.6   | 1404.9   | 760.0         | 1873.6     | 2.5         |
| 209699_x_at  | AKR1C2                | 6.35E-03 | 2906.2     | 2976.9     | 1119.6     | 2335.2      | 1552.6      | 1296.2      | 1000.4      | 3369.8  | 4483.8  | 6516.6  | 3261.5   | 2984.0   | 3742.8   | 3127.9   | 1552.6        | 3369.8     | 2.2         |
| 211653_x_at  | AKR1C2                | 8.45E-03 | 751.7      | 804.6      | 288.1      | 615.2       | 399.7       | 402.7       | 360.6       | 817.9   | 993.8   | 1276.4  | 915.2    | 757.9    | 957.9    | 705.9    | 402.7         | 915.2      | 2.3         |
| 212607_at    | AKT3                  | 7.56E-04 | 509.3      | 491.3      | 595.4      | 559.0       | 722.2       | 628.0       | 717.7       | 778.0   | 930.3   | 1695.1  | 956.0    | 988.1    | 970.7    | 1285.1   | 595.4         | 970.7      | 1.6         |
| 219393_s_at  | AKT3                  | 8.40E-04 | 242.9      | 216.2      | 313.6      | 276.6       | 328.7       | 299.6       | 334.5       | 380.7   | 357.4   | 797.6   | 430.6    | 406.0    | 534.2    | 579.8    | 299.6         | 430.6      | 1.4         |
| 222880_at    | AKT3                  | 7.71E-04 | 730.2      | 590.7      | 892.6      | 848.8       | 944.6       | 893.2       | 895.3       | 1196.0  | 1337.6  | 2541.3  | 1321.5   | 1250.6   | 1430.6   | 1898.2   | 892.6         | 1337.6     | 1.5         |
| 224229_s_at  | AKT3                  | 8.92E-04 | 378.5      | 386.2      | 576.5      | 465.6       | 622.9       | 516.2       | 585.6       | 612.3   | 708.5   | 1218.3  | 670.5    | 719.7    | 809.8    | 1029.3   | 516.2         | 719.7      | 1.4         |
| 201951_at    | ALCAM                 | 5.49E-03 | 1118.6     | 1139.0     | 1551.7     | 1054.7      | 1089.3      | 1349.6      | 1682.7      | 1412.1  | 1734.3  | 2407.0  | 1630.6   | 1283.1   | 1449.3   | 2212.4   | 1139.0        | 1630.6     | 1.4         |
| 201952_at    | ALCAM                 | 3.32E-03 | 2889.0     | 2803.9     | 3142.5     | 2397.0      | 2222.7      | 2651.1      | 3094.3      | 3579.2  | 3535.0  | 4390.8  | 3042.2   | 3085.5   | 3145.2   | 3896.7   | 2803.9        | 3535.0     | 1.3         |
| 201196_s_at  | AMD1                  | 1.55E-03 | 1839.4     | 1885.6     | 1915.0     | 1835.7      | 1552.7      | 1661.0      | 1949.2      | 2085.5  | 2765.0  | 3199.4  | 2716.3   | 2115.9   | 2206.4   | 2923.3   | 1839.4        | 2716.3     | 1.5         |
| 207992_s_at  | AMPD3                 | 1.72E-03 | 54.4       | 85.7       | 47.4       | 83.7        | 86.7        | 39.1        | 73.5        | 142.2   | 88.0    | 140.5   | 170.1    | 142.4    | 90.5     | 127.8    | 73.5          | 140.5      | 1.9         |
| 209491_s_at  | AMPD3                 | 2.94E-04 | 38.7       | 38.6       | 51.2       | 57.8        | 52.2        | 49.2        | 61.1        | 69.5    | 55.0    | 82.8    | 116.8    | 98.1     | 68.0     | 91.4     | 51.2          | 82.8       | 1.6         |
| 223967_at    | ANGPTL6               | 7.16E-04 | 81.5       | 51.2       | 89.9       | 73.8        | 68.1        | 76.7        | 72.5        | 92.2    | 107.2   | 180.7   | 117.6    | 117.7    | 179.7    | 128.1    | 73.8          | 117.7      | 1.6         |
| 219868_s_at  | ANKFY1                | 1.45E-03 | 404.0      | 346.4      | 409.1      | 372.1       | 388.1       | 366.6       | 359.2       | 485.8   | 461.7   | 588.9   | 490.7    | 512.2    | 572.2    | 601.7    | 372.1         | 521.2      | 1.4         |
| 224900_at    | ANKFY1                | 1.12E-03 | 643.9      | 653.1      | 602.7      | 572.2       | 683.3       | 568.1       | 554.9       | 897.4   | 786.8   | 980.2   | 892.1    | 850.4    | 860.2    | 862.9    | 602.7         | 862.9      | 1.4         |
| 1553138_a_at | ANKLE1                | 2.94E-04 | 116.1      | 64.2       | 125.1      | 171.3       | 150.6       | 86.2        | 239.7       | 223.0   | 135.7   | 236.4   | 367.6    | 194.6    | 236.8    | 403.2    | 125.1         | 236.4      | 1.9         |
| 212200_at    | ANKLE2                | 8.83E-03 | 598.3      | 592.6      | 748.7      | 725.0       | 700.7       | 620.0       | 1485.5      | 689.8   | 816.1   | 1423.4  | 982.2    | 749.2    | 880.0    | 1918.3   | 700.7         | 880.0      | 1.3         |
| 212201_at    | ANKLE2                | 1.02E-03 | 214.6      | 181.4      | 211.3      | 209.3       | 200.4       | 166.4       | 345.7       | 272.8   | 284.1   | 436.4   | 266.2    | 380.0    | 374.4    | 584.2    | 209.3         | 374.4      | 1.8         |
| 213962_s_at  | ANKLE2                | 6.07E-04 | 168.3      | 118.0      | 176.9      | 187.4       | 172.8       | 157.8       | 299.1       | 250.8   | 210.3   | 433.9   | 225.2    | 322.1    | 293.6    | 565.6    | 172.8         | 293.6      | 1.7         |
| 238439_at    | ANKRD22               | 9.08E-06 | 49.6       | 51.6       | 72.5       | 50.3        | 65.9        | 39.8        | 82.3        | 244.3   | 177.7   | 333.6   | 421.3    | 244.0    | 145.3    | 328.0    | 51.6          | 244.3      | 4.7         |
| 239196_at    | ANKRD22               | 1.12E-05 | 42.7       | 27.8       | 57.2       | 40.1        | 67.3        | 24.8        | 81.0        | 248.2   | 153.1   | 328.6   | 377.8    | 209.6    | 106.5    | 316.4    | 42.7          | 248.2      | 5.8         |
| 202888_s_at  | ANPEP                 | 4.52E-03 | 349.5      | 455.3      | 99.6       | 550.3       | 522.3       | 234.4       | 557.4       | 418.0   | 563.6   | 197.0   | 655.4    | 881.8    | 521.9    | 833.6    | 455.3         | 563.6      | 1.2         |
| 1555536_at   | ANTXR2                | 1.09E-03 | 60.0       | 50.6       | 51.9       | 52.5        | 51.6        | 48.3        | 40.9        | 80.3    | 66.6    | 90.6    | 105.0    | 104.9    | 71.7     | 106.5    | 51.6          | 90.6       | 1.8         |
| 225524_at    | ANTXR2                | 3.96E-05 | 152.1      | 86.7       | 74.2       | 95.5        | 85.0        | 66.9        | 84.2        | 292.9   | 221.2   | 269.5   | 233.5    | 323.4    | 186.6    | 371.9    | 85.0          | 269.5      | 3.2         |
| 1568126_at   | ANXA2                 | 9.33E-03 | 1767.7     | 1473.5     | 1384.6     | 1516.3      | 1564.1      | 1038.4      | 1622.8      | 1813.5  | 1967.8  | 2229.1  | 1718.9   | 2320.0   | 2129.1   | 2278.2   | 1516.3        | 2129.1     | 1.4         |
| 209369_at    | ANXA3                 | 7.21E-05 | 20.5       | 34.3       | 43.6       | 74.1        | 59.5        | 26.4        | 78.0        | 65.4    | 129.8   | 252.8   | 175.4    | 122.3    | 111.1    | 200.4    | 43.6          | 129.8      | 3.0         |
| 203300_x_at  | AP1S2                 | 6.42E-03 | 646.2      | 623.3      | 538.5      | 499.5       | 690.3       | 560.3       | 584.9       | 644.2   | 798.5   | 886.5   | 673.7    | 927.3    | 755.6    | 850.0    | 584.9         | 798.5      | 1.4         |
| 230264_s_at  | AP1S2                 | 5.90E-03 | 1134.8     | 1070.3     | 1146.9     | 1005.2      | 1421.5      | 1116.0      | 1134.8      | 1228.6  | 1602.6  | 1852.7  | 1328.9   | 1708.7   | 1338.7   | 1769.5   | 1134.8        | 1602.6     | 1.4         |
| 219465_at    | APOA2                 | 2.81E-04 | 111.5      | 84.8       | 176.2      | 125.9       | 139.5       | 123.9       | 176.9       | 181.2   | 121.1   | 311.3   | 166.6    | 243.5    | 206.8    | 256.9    | 125.9         | 206.8      | 1.6         |
| 219466_s_at  | APOA2                 | 9.23E-03 | 61.3       | 52.6       | 67.2       | 53.3        | 52.6        | 55.8        | 65.0        | 69.3    | 59.5    | 93.1    | 72.8     | 87.5     | 67.3     | 79.4     | 55.8          | 72.8       | 1.3         |
| 210873_x_at  | APOBEC3A              | 6.17E-06 | 52.9       | 47.8       | 90.4       | 46.4        | 84.6        | 37.7        | 46.2        | 394.7   | 1358.8  | 2685.7  | 1206.8   | 816.2    | 1282.7   | 1084.0   | 47.8          | 1206.8     | 25.2        |
| 214994_at    | APOBEC3F              | 1.07E-04 | 67.6       | 71.9       | 69.2       | 78.0        | 80.9        | 83.0        | 87.2        | 119.1   | 128.8   | 169.5   | 122.8    | 126.2    | 150.6    | 179.5    | 78.0          | 128.8      | 1.7         |
| 214995_s_at  | APOBEC3F /// APOBEC3G | 1.15E-05 | 109.1      | 109.6      | 163.0      | 132.9       | 146.6       | 160.5       | 146.0       | 235.8   | 245.7   | 389.3   | 256.6    | 357.5    | 307.7    | 380.2    | 146.0         | 307.7      | 2.1         |
| 204205_at    | APOBEC3G              | 6.50E-05 | 192.5      | 247.0      | 370.8      | 362.4       | 365.4       | 396.3       | 372.3       | 550.9   | 562.6   | 992.3   | 661.2    | 828.7    | 614.3    | 924.3    | 365.4         | 661.2      | 1.8         |
| 221653_x_at  | APOL2                 | 1.64E-03 | 7542.0     | 7749.9     | 8588.9     | 8934.5      | 6030.3      | 5999.6      | 8009.1      | 8443.4  | 11485.1 | 13371.0 | 11350.3  | 8770.3   | 9163.2   | 11666.5  | 7749.9        | 11350.3    | 1.5         |
| 221087_s_at  | APOL3                 | 2.11E-05 | 488.0      | 529.0      | 729.6      | 664.5       | 723.0       | 490.5       | 732.5       | 1038.4  | 1567.1  | 2178.0  | 1911.8   | 1327.5   | 1164.5   | 1664.1   | 664.5         | 1567.1     | 2.4         |
| 1557236_at   | APOL6                 | 7.04E-03 | 635.8      | 804.0      | 1113.2     | 1004.5      | 909.4       | 1204.5      | 1296.6      | 840.2   | 1497.3  | 2575.1  | 1839.7   | 1168.5   | 1181.8   | 1940.5   | 1004.5        | 1497.3     | 1.5         |
| 219716_at    | APOL6                 | 1.87E-04 | 600.5      | 790.8      | 754.9      | 719.6       | 808.1       | 811.7       | 863.7       | 1188.4  | 1471.9  | 1925.4  | 1380.8   | 1331.7   | 1106.4   | 1929.2   | 790.8         | 1380.8     | 1.7         |
| 241869_at    | APOL6                 | 2.45E-03 | 105.4      | 138.1      | 174.6      | 147.9       | 107.1       | 142.5       | 143.7       | 220.9   | 158.2   | 407.3   | 198.5    | 170.8    | 205.5    | 227.4    | 142.5         | 205.5      | 1.4         |
| 221620_s_at  | APOO                  | 3.46E-03 | 294.5      | 310.3      | 263.9      | 259.2       | 305.4       | 276.9       | 269.0       | 451.2   | 351.1   | 446.0   | 382.6    | 420.7    | 390.9    | 306.7    | 276.9         | 390.9      | 1.4         |
| 205568_at    | AQP9                  | 1.23E-04 | 1499.8     | 909.1      | 941.9      | 1106.1      | 2563.7      | 692.2       | 2068.6      | 3864.6  | 5451.1  | 6421.6  | 4849.5   | 5620.4   | 5276.0   | 6000.9   | 1106.1        | 5451.1     | 4.9         |
| 214102_at    | ARAP2                 | 5.60E-03 | 66.4       | 45.0       | 84.0       | 77.6        | 79.7        | 65.6        | 78.2        | 78.8    | 65.1    | 129.3   | 102.0    | 98.4     | 83.5     | 87.5     | 77.6          | 87.5       | 1.1         |
| 218950_at    | ARAP3                 | 2.01E-04 | 50.5       | 34.7       | 49.7       | 58.0        | 40.3        | 35.0        | 42.2        | 73.1    | 64.6    | 103.8   | 109.9    | 102.3    | 51.6     | 83.9     | 42.2          | 83.9       | 2.0         |
| 205239_at    | AREG                  | 1.52E-03 | 32.3       | 33.1       | 19.4       | 17.9        | 21.3        | 18.7        | 29.7        | 42.5    | 63.3    | 98.4    | 36.3     | 104.2    | 45.4     | 64.6     | 21.3          | 63.3       | 3.0         |
| 201096_s_at  | ARF4                  | 8.28E-04 | 315.5      | 375.6      | 368.2      | 378.1       | 456.1       | 418.0       | 471.4       | 535.8   | 613.8   | 864.0   | 699.5    | 611.1    | 593.2    | 653.8    | 378.1         | 613.8      | 1.6         |
| 203311_s_at  | ARF6                  | 7.31E-03 | 588.9      | 360.8      | 454.4      | 508.1       | 517.2       | 434.0       | 540.9       | 655.6   | 437.6   | 599.0   | 592.3    | 861.9    | 777.6    | 748.8    | 508.1         | 655.6      | 1.3         |
| 202211_at    | ARFGAP3               | 1.17E-03 | 740.2      | 824.6      | 980.0      | 960.2       | 1138.9      | 1003.0      | 1230.0      | 1180.2  | 1441.4  | 2297.3  | 1518.1   | 1448.7   | 1417.1   | 1735.0   | 980.0         | 1448.7     | 1.5         |
| 226638_at    | ARHGAP23              | 4.81E-03 | 60.0       | 67.5       | 45.3       | 37.4        | 48.2        | 51.6        | 37.9        | 66.3    | 86.1    | 104.1   | 58.6     | 73.0     | 68.4     | 81.9     | 48.2          | 73.0       | 1.5         |
| 225618_at    | ARHGAP27              | 2.55E-03 | 457.2      | 392.8      | 445.0      | 448.0       |             |             |             |         |         |         |          |          |          |          |               |            |             |

Supplementary Table S1. Continued..

| ID           | Gene Symbol | p-value  | VW3_Saline | VW6_Saline | VW7_Saline | VW13_Saline | VW22_Saline | VW23_Saline | VW25_Saline | VW3_LPS | VW6_LPS | VW7_LPS | VW13_LPS | VW22_LPS | VW23_LPS | VW25_LPS | Median_saline | Median_LPS | Fold change |
|--------------|-------------|----------|------------|------------|------------|-------------|-------------|-------------|-------------|---------|---------|---------|----------|----------|----------|----------|---------------|------------|-------------|
| 216008_s_at  | ARIH2       | 4.68E-03 | 148.0      | 115.0      | 167.8      | 141.7       | 159.5       | 144.6       | 149.4       | 185.6   | 147.4   | 231.3   | 179.3    | 180.3    | 176.6    | 200.5    | 148.0         | 180.3      | 1.2         |
| 202091_at    | ARL2BP      | 1.36E-03 | 255.5      | 222.6      | 284.1      | 275.7       | 324.4       | 276.3       | 319.1       | 379.7   | 305.1   | 426.5   | 431.3    | 393.4    | 361.9    | 407.1    | 276.3         | 393.4      | 1.4         |
| 202207_at    | ARL4C       | 1.34E-03 | 70.8       | 42.1       | 71.4       | 72.6        | 72.6        | 48.5        | 39.3        | 114.7   | 56.2    | 83.1    | 127.8    | 133.8    | 76.7     | 88.6     | 70.8          | 88.6       | 1.3         |
| 242727_at    | ARL5B       | 4.14E-04 | 56.9       | 61.9       | 128.0      | 109.8       | 127.6       | 117.5       | 161.5       | 130.9   | 268.6   | 794.8   | 207.7    | 304.8    | 222.5    | 484.2    | 117.5         | 268.6      | 2.3         |
| 222442_s_at  | ARL8B       | 1.09E-03 | 1865.2     | 1860.6     | 1700.5     | 1735.3      | 1968.4      | 1643.5      | 2354.9      | 2272.7  | 3595.6  | 4620.0  | 2746.0   | 2932.8   | 2990.2   | 4046.9   | 1860.6        | 2990.2     | 1.6         |
| 218694_at    | ARMCX1      | 2.20E-03 | 253.6      | 351.0      | 367.8      | 295.0       | 332.0       | 222.8       | 302.6       | 349.8   | 640.7   | 801.3   | 394.4    | 399.7    | 303.3    | 562.1    | 302.6         | 399.7      | 1.3         |
| 220658_s_at  | ARNTL2      | 1.50E-04 | 33.8       | 19.2       | 22.7       | 20.5        | 30.1        | 12.4        | 35.6        | 62.0    | 38.9    | 104.4   | 86.8     | 75.3     | 57.1     | 99.2     | 22.7          | 75.3       | 3.3         |
| 223586_at    | ARNTL2      | 1.35E-03 | 62.4       | 52.1       | 47.1       | 39.5        | 71.2        | 53.9        | 80.5        | 95.9    | 75.2    | 120.2   | 126.7    | 105.5    | 106.5    | 125.2    | 53.9          | 106.5      | 2.0         |
| 224204_x_at  | ARNTL2      | 1.02E-03 | 61.8       | 44.0       | 48.4       | 45.2        | 61.5        | 35.3        | 77.2        | 113.0   | 62.7    | 195.7   | 160.3    | 134.5    | 129.6    | 122.4    | 48.4          | 129.6      | 2.7         |
| 224797_at    | ARRDC3      | 1.29E-03 | 69.8       | 70.7       | 113.6      | 90.1        | 110.5       | 130.1       | 94.0        | 129.4   | 117.3   | 273.4   | 392.0    | 239.5    | 174.8    | 175.6    | 94.0          | 175.6      | 1.9         |
| 231791_at    | ASAH2B      | 1.62E-04 | 29.6       | 23.7       | 39.1       | 42.5        | 23.9        | 29.2        | 33.6        | 59.1    | 86.1    | 168.5   | 80.4     | 52.5     | 80.3     | 66.6     | 29.6          | 80.3       | 2.7         |
| 224796_at    | ASAP1       | 7.32E-03 | 1141.5     | 913.7      | 1108.4     | 1085.2      | 1308.0      | 1129.7      | 1219.0      | 1572.1  | 1025.0  | 1434.3  | 1523.4   | 1601.7   | 1464.7   | 1366.4   | 1129.7        | 1464.7     | 1.3         |
| 236533_at    | ASAP1       | 1.92E-03 | 388.5      | 239.7      | 316.2      | 304.1       | 347.3       | 288.2       | 333.1       | 448.8   | 299.3   | 545.0   | 408.4    | 548.1    | 459.0    | 476.5    | 316.2         | 459.0      | 1.5         |
| 229215_at    | ASCL2       | 1.65E-03 | 74.2       | 61.9       | 79.6       | 87.1        | 106.5       | 90.4        | 62.4        | 112.9   | 162.2   | 134.9   | 141.7    | 161.8    | 109.5    | 157.7    | 79.6          | 141.7      | 1.8         |
| 206130_s_at  | ASGR2       | 8.55E-03 | 82.1       | 52.7       | 75.4       | 61.2        | 72.6        | 64.4        | 70.0        | 85.1    | 79.5    | 90.5    | 73.3     | 141.8    | 91.2     | 119.5    | 70.0          | 90.5       | 1.3         |
| 244519_at    | ASXL1       | 6.94E-03 | 117.6      | 87.8       | 164.4      | 164.7       | 168.4       | 141.5       | 158.9       | 159.0   | 131.7   | 254.9   | 196.9    | 167.0    | 202.8    | 218.4    | 158.9         | 196.9      | 1.2         |
| 1554980_a_at | ATF3        | 4.69E-05 | 90.7       | 53.6       | 79.8       | 82.4        | 96.1        | 75.3        | 101.3       | 190.8   | 200.9   | 354.9   | 170.3    | 230.9    | 261.4    | 330.4    | 82.4          | 230.9      | 2.8         |
| 202672_s_at  | ATF3        | 1.39E-05 | 256.6      | 123.9      | 191.1      | 141.4       | 265.8       | 155.0       | 242.2       | 603.3   | 776.7   | 1342.2  | 686.2    | 1084.9   | 796.5    | 1100.9   | 191.1         | 796.5      | 4.2         |
| 204998_s_at  | ATF5        | 9.85E-05 | 429.7      | 282.6      | 325.4      | 391.9       | 432.4       | 262.5       | 427.5       | 681.8   | 808.6   | 1214.0  | 827.7    | 935.7    | 864.9    | 1192.4   | 391.9         | 864.9      | 2.2         |
| 204999_s_at  | ATF5        | 2.27E-05 | 86.5       | 53.4       | 111.5      | 103.7       | 139.8       | 77.2        | 147.3       | 205.5   | 185.7   | 350.5   | 220.8    | 360.0    | 305.7    | 336.4    | 103.7         | 305.7      | 2.9         |
| 217389_s_at  | ATF5        | 2.83E-05 | 194.5      | 102.1      | 170.8      | 145.0       | 207.5       | 168.7       | 191.2       | 349.6   | 307.1   | 495.3   | 312.9    | 441.0    | 350.5    | 473.2    | 170.8         | 350.5      | 2.1         |
| 203454_s_at  | ATOX1       | 8.65E-03 | 2475.8     | 2394.6     | 2590.7     | 2334.8      | 2525.8      | 2137.7      | 2379.3      | 3641.3  | 2474.3  | 3177.5  | 3030.6   | 3528.3   | 2857.4   | 2829.1   | 2394.6        | 3030.6     | 1.3         |
| 1554556_a_at | ATP11B      | 8.12E-03 | 110.8      | 72.1       | 133.6      | 179.2       | 187.0       | 169.7       | 174.0       | 163.5   | 144.5   | 275.4   | 215.4    | 230.6    | 191.7    | 225.1    | 169.7         | 215.4      | 1.3         |
| 1564063_a_at | ATP11B      | 9.46E-03 | 411.8      | 278.0      | 269.9      | 353.0       | 345.2       | 301.9       | 349.3       | 392.7   | 519.6   | 574.7   | 422.4    | 460.3    | 455.5    | 558.3    | 345.2         | 460.3      | 1.3         |
| 212297_at    | ATP13A3     | 3.76E-03 | 1242.6     | 1183.9     | 1347.4     | 1452.2      | 1730.0      | 1486.8      | 2317.0      | 1694.1  | 1654.7  | 2362.5  | 2114.1   | 1922.0   | 1938.0   | 2885.8   | 1452.2        | 1938.0     | 1.3         |
| 219558_at    | ATP13A3     | 1.58E-04 | 2889.9     | 2481.2     | 2391.4     | 2518.3      | 2854.5      | 2195.1      | 3455.2      | 4046.1  | 3724.9  | 4415.3  | 4031.5   | 5152.7   | 4600.1   | 6241.2   | 2518.3        | 4415.3     | 1.8         |
| 209186_at    | ATP2A2      | 9.67E-03 | 2551.5     | 2782.4     | 2686.5     | 2751.3      | 2748.0      | 2596.2      | 3279.2      | 3283.8  | 3703.6  | 3837.0  | 3730.0   | 2987.7   | 3181.1   | 3600.7   | 2748.0        | 3600.7     | 1.3         |
| 209292_at    | ATP2B1      | 9.25E-04 | 574.8      | 415.1      | 552.9      | 617.2       | 983.4       | 683.4       | 746.0       | 894.2   | 1073.4  | 2383.9  | 1018.4   | 1522.9   | 1518.0   | 1678.7   | 617.2         | 1518.0     | 2.5         |
| 215716_s_at  | ATP2B1      | 2.77E-03 | 774.5      | 584.9      | 1007.5     | 953.3       | 1369.0      | 1121.9      | 1315.9      | 1020.9  | 1521.6  | 3553.1  | 1452.6   | 1818.7   | 2050.2   | 2358.1   | 1007.5        | 1818.7     | 1.8         |
| 209934_s_at  | ATP2C1      | 7.17E-03 | 1293.1     | 1563.4     | 1436.7     | 1544.6      | 1569.5      | 1207.7      | 1667.1      | 1357.4  | 2031.9  | 2182.0  | 2155.5   | 1792.4   | 1818.5   | 2182.5   | 1544.6        | 2031.9     | 1.3         |
| 1557523_at   | ATP6AP1L    | 8.95E-03 | 333.9      | 209.9      | 297.9      | 476.5       | 482.2       | 515.4       | 744.1       | 553.8   | 540.9   | 1349.8  | 788.6    | 567.5    | 744.0    | 993.9    | 476.5         | 744.0      | 1.6         |
| 221504_s_at  | ATP6V1H     | 1.57E-03 | 1881.9     | 1521.0     | 1291.5     | 1405.1      | 1561.5      | 1000.8      | 1277.2      | 2145.8  | 2250.8  | 2576.0  | 1967.0   | 2667.2   | 2333.1   | 2193.8   | 1405.1        | 2250.8     | 1.6         |
| 214343_s_at  | ATXN7L1     | 1.48E-03 | 79.2       | 81.9       | 94.3       | 86.2        | 99.4        | 81.0        | 90.7        | 124.6   | 93.2    | 232.1   | 131.8    | 167.3    | 129.1    | 152.2    | 86.2          | 131.8      | 1.5         |
| 227732_at    | ATXN7L1     | 1.62E-03 | 68.0       | 77.4       | 116.4      | 107.9       | 107.1       | 129.3       | 89.4        | 92.9    | 133.6   | 182.0   | 134.8    | 139.9    | 161.5    | 130.4    | 107.1         | 134.8      | 1.3         |
| 232311_at    | B2M         | 5.68E-04 | 140.1      | 120.0      | 217.0      | 181.0       | 185.8       | 134.9       | 187.9       | 195.8   | 194.9   | 510.5   | 286.7    | 272.6    | 229.1    | 275.4    | 181.0         | 272.6      | 1.5         |
| 1556134_a_at | B3GNT5      | 5.08E-03 | 62.8       | 65.2       | 85.4       | 88.7        | 156.6       | 97.3        | 122.5       | 126.8   | 121.3   | 277.5   | 174.7    | 141.5    | 153.1    | 202.9    | 88.7          | 153.1      | 1.7         |
| 201882_x_at  | B4GALT1     | 8.13E-03 | 101.2      | 79.7       | 100.7      | 122.0       | 131.9       | 95.6        | 140.9       | 125.4   | 91.9    | 188.4   | 147.2    | 178.2    | 154.0    | 166.6    | 101.2         | 154.0      | 1.5         |
| 201883_s_at  | B4GALT1     | 1.24E-03 | 5811.4     | 4893.8     | 5400.4     | 5810.6      | 7346.9      | 5603.6      | 7286.9      | 7554.6  | 8570.3  | 10556.8 | 9459.9   | 8805.8   | 9091.9   | 10128.7  | 5810.6        | 9091.9     | 1.6         |
| 211631_x_at  | B4GALT1     | 2.48E-04 | 2445.0     | 1630.8     | 1624.1     | 1915.2      | 2975.3      | 1656.5      | 2883.0      | 3549.8  | 4025.2  | 5087.1  | 4394.1   | 5101.8   | 5009.2   | 5493.2   | 1915.2        | 5009.2     | 2.6         |
| 216627_s_at  | B4GALT1     | 4.11E-04 | 1619.5     | 988.2      | 974.0      | 1182.3      | 1878.5      | 1092.0      | 1716.2      | 2267.4  | 2487.3  | 3469.5  | 2977.8   | 3030.4   | 3509.0   | 3617.5   | 1182.3        | 3030.4     | 2.6         |
| 229403_at    | B4GALT1     | 3.42E-05 | 582.2      | 342.1      | 446.3      | 470.9       | 779.9       | 436.6       | 717.7       | 1058.7  | 963.7   | 1511.6  | 1263.8   | 1756.0   | 1525.3   | 1581.7   | 470.9         | 1511.6     | 3.2         |
| 238987_at    | B4GALT1     | 5.25E-03 | 84.0       | 41.8       | 73.4       | 70.4        | 79.5        | 73.2        | 76.0        | 111.7   | 124.5   | 244.5   | 123.7    | 79.0     | 133.2    | 145.7    | 73.4          | 124.5      | 1.7         |
| 221484_at    | B4GALT5     | 5.84E-04 | 3398.9     | 2218.2     | 2438.0     | 3394.9      | 3635.1      | 2685.9      | 4043.3      | 4800.0  | 6806.0  | 7283.3  | 5404.3   | 6129.7   | 6536.3   | 7810.8   | 3394.9        | 6536.3     | 1.9         |
| 221485_at    | B4GALT5     | 2.55E-03 | 502.1      | 303.9      | 793.1      | 939.0       | 1165.4      | 759.6       | 1160.6      | 848.7   | 1493.2  | 2880.6  | 1516.3   | 1614.6   | 1601.1   | 2123.7   | 793.1         | 1601.1     | 2.0         |
| 204194_at    | BACH1       | 1.49E-03 | 1573.4     | 1779.8     | 2441.6     | 1938.8      | 2327.8      | 2095.5      | 2882.3      | 2107.7  | 2849.6  | 4422.3  | 2744.6   | 2862.8   | 2814.6   | 3886.4   | 2095.5        | 2849.6     | 1.4         |
| 210818_s_at  | BACH1       | 2.69E-03 | 524.1      | 377.7      | 509.0      | 490.9       | 533.3       | 416.8       | 577.9       | 600.6   | 764.7   | 935.7   | 551.7    | 902.0    | 949.4    | 1009.4   | 509.0         | 902.0      | 1.8         |
| 234938_at    | BACH1       | 4.42E-03 | 49.9       | 59.9       | 47.2       | 38.3        | 47.2        | 31.7        | 50.3        | 62.8    | 58.6    | 79.5    | 83.2     | 78.5     | 54.0     | 79.8     | 47.2          | 78.5       | 1.7         |
| 202387_at    | BAG1        | 6.91E-04 | 1530.3     | 1516.9     | 1311.6     | 1304.1      | 1149.9      | 1168.8      | 1091.5      | 1887.0  | 2171.4  | 2152.1  | 1745.0   | 2075.9   | 1967.0   | 1947.7   | 1304.1        | 1967.0     | 1.5         |
| 211475_s_at  | BAG1        | 3.48E-03 | 2151.3     | 1939.8     | 1748.0     | 1796.1      | 1556.7      | 1699.3      | 1380.0      | 2240.8  | 2716.1  | 2728.1  | 2234.0   | 2438.1   | 2536.0   | 2445.1   | 1748.0        | 2445.1     | 1.4         |
| 203728_at    | BAK1        | 4.05E-03 | 158.7      | 138.1      | 182.9      | 219.0       | 182.2       | 176.6       | 208.0       | 191.2   | 169.4   | 258.2   | 256.1    | 240.1    | 223.9    | 282.1    | 182.2         | 240.1      | 1.3         |
| 205345_at    | BARD1       | 8.33E-03 | 358.8      | 273.1      | 243.6      | 292.1       | 188.4       | 223.8       | 200.5       | 424.4   | 315.5   | 317.0   | 324.3    | 275.2    | 303.8    | 343.9    | 243.6         | 317.0      | 1.3         |
| 202391_at    | BASP1       | 5.13E-05 | 472.0      | 411.0      | 459.7      | 590.6       | 778.7       | 469.3       | 1012.0      | 1181.1  | 2559.0  | 3524.4  | 1728.1   | 2404.5   | 2111.9   | 3635.1   | 472.0         | 2404.5     | 5.1         |
| 205965_at    | BATF        | 2.83E-05 | 99.2       | 86.7       | 93.3       | 86.0        | 114.2       | 60.4        | 99.3        | 232.2   | 202.0   | 344.3   | 247.6    | 451.3    | 319.4    | 433.5    | 93.3          | 319.4      | 3.4         |
| 228439_at    | BATF2       | 3.37E-05 | 157.4      | 160.5      | 189.1      | 173.8       | 147.1       | 99.4        | 148.2       | 329.0   | 560.4   | 1012.7  | 442.8    | 491.5    | 363.9    | 720.8    | 157.4         | 491.5      | 3.1         |
| 220358_at    | BATF3       | 3.36E-04 | 513.9      | 158.1      | 266.7      | 296.4       | 373.5       | 263.0       | 344.9       | 654.1   | 766.7   | 1192.5  | 720.4    | 1023.8   | 1085.3   | 1312.6   | 296.4         | 1023.8     | 3.5         |
| 217985_s_at  | BAZ1A       | 5.78E-04 | 951.8      | 871.1      | 1233.0     | 1324.0      | 1720.3      | 1187.5      | 1708.2      | 1594.2  | 2397.7  | 3682.6  | 2222.8   | 2432.0   | 2097.0   | 3169.9   | 1233.0        | 2397.7     | 1.9         |
| 217986_s_at  | BAZ1A       | 1.75E-03 | 536.5      | 464.0      | 840.0      | 792.5       | 931.2       | 819.1       | 992.5       | 836.4   | 1317.6  | 2221.9  | 1475.1   | 1114.5   | 1221.0   | 1697.6   | 819.1         | 1317.6     | 1.6         |
| 210347_s_at  | BCL11A      | 4.50E-03 | 34.0       | 53.9       | 82.5       | 66.3        | 69.3        | 41.8        |             |         |         |         |          |          |          |          |               |            |             |

TRANSCRIPTION PROFILES IN ALVEOLAR MACROPHAGES

Supplementary Table S1. Continued.

| ID           | Gene Symbol        | p-value  | VW3_Saline | VW6_Saline | VW7_Saline | VW13_Saline | VW22_Saline | VW23_Saline | VW25_Saline | VW3_LPS | VW6_LPS | VW7_LPS | VW13_LPS | VW22_LPS | VW23_LPS | VW25_LPS | Median_saline | Median_LPS | Fold change |  |
|--------------|--------------------|----------|------------|------------|------------|-------------|-------------|-------------|-------------|---------|---------|---------|----------|----------|----------|----------|---------------|------------|-------------|--|
| 228758_at    | BCL6               | 1.78E-03 | 177.8      | 110.7      | 141.1      | 149.9       | 186.5       | 119.4       | 176.0       | 203.9   | 210.2   | 348.9   | 237.9    | 257.3    | 285.1    | 291.0    | 149.9         | 257.3      | 1.7         |  |
| 1554442_at   | BEST1              | 3.83E-04 | 420.2      | 373.0      | 392.1      | 413.1       | 406.1       | 371.2       | 387.5       | 513.6   | 566.6   | 781.9   | 649.8    | 715.6    | 676.9    | 730.1    | 392.1         | 676.9      | 1.7         |  |
| 1554443_s_at | BEST1              | 2.93E-04 | 337.6      | 227.8      | 320.4      | 350.4       | 319.7       | 285.1       | 310.1       | 412.2   | 397.4   | 627.9   | 540.7    | 553.8    | 510.6    | 565.0    | 319.7         | 540.7      | 1.7         |  |
| 2044930_at   | BID                | 7.40E-05 | 359.7      | 207.6      | 338.7      | 317.1       | 505.9       | 370.1       | 497.0       | 679.5   | 387.7   | 710.2   | 653.4    | 831.8    | 598.3    | 748.5    | 359.7         | 679.5      | 1.9         |  |
| 211725_s_at  | BID                | 5.21E-05 | 773.8      | 495.5      | 654.7      | 795.0       | 936.3       | 619.1       | 968.3       | 1270.4  | 1092.2  | 1529.6  | 1420.7   | 1891.0   | 1591.1   | 1718.4   | 773.8         | 1529.6     | 2.0         |  |
| 227143_s_at  | BID                | 2.14E-04 | 485.2      | 324.4      | 426.3      | 508.3       | 626.7       | 444.0       | 554.9       | 824.9   | 560.2   | 682.6   | 762.7    | 879.1    | 829.1    | 779.5    | 485.2         | 779.5      | 1.6         |  |
| 210538_s_at  | BIRC3              | 1.14E-04 | 65.1       | 75.4       | 97.9       | 72.8        | 152.9       | 55.3        | 138.5       | 161.2   | 146.3   | 237.2   | 261.8    | 246.9    | 175.5    | 290.9    | 75.4          | 237.2      | 3.1         |  |
| 203840_at    | BLZF1              | 2.78E-03 | 36.4       | 44.5       | 73.9       | 75.5        | 96.7        | 93.0        | 95.3        | 107.3   | 87.1    | 249.5   | 147.5    | 132.7    | 114.2    | 143.3    | 75.5          | 132.7      | 1.8         |  |
| 32088_at     | BLZF1              | 6.12E-04 | 46.9       | 62.0       | 101.7      | 98.0        | 134.9       | 129.0       | 104.3       | 150.0   | 126.2   | 318.9   | 202.3    | 211.8    | 175.7    | 206.4    | 101.7         | 202.3      | 2.0         |  |
| 205290_s_at  | BMP2               | 2.95E-03 | 51.1       | 41.9       | 36.9       | 40.6        | 35.5        | 35.5        | 40.8        | 61.8    | 86.7    | 153.5   | 59.6     | 62.2     | 61.1     | 109.7    | 40.6          | 62.2       | 1.5         |  |
| 209920_at    | BMPR2              | 2.77E-04 | 753.5      | 682.6      | 638.2      | 681.2       | 723.7       | 703.5       | 649.0       | 1052.1  | 1057.1  | 1073.8  | 940.2    | 1169.9   | 1087.6   | 1262.1   | 682.6         | 1073.8     | 1.6         |  |
| 210214_s_at  | BMPR2              | 6.93E-04 | 482.3      | 500.0      | 446.4      | 462.2       | 512.6       | 477.5       | 489.4       | 759.4   | 665.5   | 886.4   | 669.4    | 721.8    | 665.6    | 904.9    | 482.3         | 721.8      | 1.5         |  |
| 204930_s_at  | BNIP1              | 2.45E-03 | 87.5       | 82.6       | 110.6      | 111.0       | 105.4       | 85.9        | 97.1        | 120.4   | 104.5   | 152.9   | 132.5    | 162.4    | 108.1    | 125.7    | 97.1          | 125.7      | 1.3         |  |
| 238724_at    | BPGM               | 2.23E-03 | 100.0      | 127.5      | 73.1       | 104.2       | 90.3        | 67.4        | 86.5        | 124.0   | 175.7   | 180.3   | 180.4    | 123.2    | 98.6     | 141.7    | 90.3          | 141.7      | 1.6         |  |
| 206044_s_at  | BRAF               | 2.47E-03 | 117.1      | 82.7       | 145.0      | 90.9        | 120.8       | 113.0       | 129.4       | 151.5   | 107.0   | 180.6   | 159.7    | 178.6    | 148.5    | 166.0    | 117.1         | 159.7      | 1.4         |  |
| 200920_s_at  | BTG1               | 2.49E-04 | 354.3      | 463.5      | 475.4      | 457.2       | 600.2       | 465.8       | 471.3       | 849.3   | 628.5   | 994.6   | 722.5    | 1408.7   | 789.1    | 931.0    | 465.8         | 849.3      | 1.8         |  |
| 200921_s_at  | BTG1               | 1.65E-03 | 985.1      | 1434.0     | 1497.2     | 1156.1      | 1751.7      | 1471.9      | 1491.0      | 1612.0  | 1781.2  | 3036.9  | 2252.3   | 2582.8   | 1774.3   | 2288.6   | 1471.9        | 2252.3     | 1.5         |  |
| 201235_s_at  | BTG2               | 1.43E-03 | 123.9      | 96.6       | 200.2      | 148.4       | 154.2       | 192.3       | 188.1       | 159.6   | 162.7   | 309.6   | 188.1    | 401.4    | 384.0    | 367.9    | 154.2         | 309.6      | 2.0         |  |
| 201236_s_at  | BTG2               | 1.55E-03 | 795.6      | 914.0      | 1587.8     | 1056.8      | 1544.0      | 1501.5      | 1398.5      | 1056.9  | 1896.6  | 2924.3  | 1433.9   | 2047.0   | 2017.9   | 2763.3   | 1398.5        | 2017.9     | 1.4         |  |
| 205548_s_at  | BTG3               | 3.44E-04 | 277.8      | 248.9      | 286.6      | 247.4       | 634.4       | 257.0       | 528.7       | 487.7   | 861.0   | 1248.1  | 767.4    | 983.0    | 1008.8   | 1140.3   | 277.8         | 983.0      | 3.5         |  |
| 213134_x_at  | BTG3               | 2.72E-04 | 268.4      | 196.6      | 265.0      | 233.7       | 578.3       | 237.3       | 488.1       | 501.1   | 788.0   | 1258.1  | 707.1    | 939.2    | 839.0    | 1094.4   | 265.0         | 839.0      | 3.2         |  |
| 203944_x_at  | BTN2A1             | 4.91E-03 | 596.9      | 544.5      | 693.2      | 631.5       | 647.7       | 633.3       | 544.7       | 835.9   | 782.3   | 935.0   | 791.5    | 703.1    | 751.5    | 815.8    | 631.5         | 791.5      | 1.3         |  |
| 215493_x_at  | BTN2A1             | 4.46E-03 | 683.9      | 541.4      | 590.8      | 569.0       | 612.2       | 539.6       | 543.8       | 778.7   | 709.6   | 853.1   | 687.4    | 729.5    | 737.6    | 779.5    | 569.0         | 737.6      | 1.3         |  |
| 200776_s_at  | BZW1 ///<br>BZW1L1 | 4.01E-03 | 137.8      | 114.0      | 206.4      | 245.7       | 265.0       | 224.2       | 286.9       | 212.5   | 174.9   | 398.3   | 320.1    | 340.6    | 271.1    | 338.8    | 224.2         | 320.1      | 1.4         |  |
| 217905_at    | C10orf119          | 1.14E-03 | 151.9      | 96.4       | 195.7      | 205.4       | 242.1       | 256.5       | 264.3       | 307.6   | 138.2   | 293.1   | 353.3    | 309.6    | 359.8    | 353.9    | 205.4         | 309.6      | 1.5         |  |
| 222464_s_at  | C10orf119          | 2.76E-04 | 701.2      | 536.5      | 555.6      | 557.8       | 835.0       | 656.2       | 718.5       | 1266.3  | 664.7   | 1017.1  | 1019.4   | 1293.4   | 1184.4   | 1136.6   | 656.2         | 1136.6     | 1.7         |  |
| 238795_at    | C10orf18           | 3.42E-03 | 63.6       | 81.6       | 87.4       | 87.4        | 97.2        | 89.6        | 103.1       | 115.2   | 103.5   | 162.1   | 122.8    | 118.6    | 136.5    | 87.4     | 118.6         | 87.4       | 1.4         |  |
| 1557312_at   | C12orf61           | 3.04E-03 | 43.7       | 41.8       | 54.1       | 49.9        | 67.0        | 52.6        | 64.4        | 68.2    | 76.0    | 235.2   | 87.8     | 97.0     | 83.1     | 109.7    | 52.6          | 87.8       | 1.7         |  |
| 1553141_at   | C13orf31           | 6.27E-03 | 107.2      | 77.0       | 113.9      | 97.8        | 140.7       | 77.7        | 132.3       | 158.1   | 113.7   | 254.8   | 200.8    | 183.7    | 174.7    | 126.0    | 107.2         | 174.7      | 1.6         |  |
| 219563_at    | C14orf139          | 5.63E-03 | 697.1      | 499.6      | 216.8      | 460.5       | 702.0       | 383.8       | 498.5       | 757.5   | 699.8   | 681.0   | 817.9    | 866.0    | 867.8    | 1304.3   | 498.5         | 817.9      | 1.6         |  |
| 227544_at    | C14orf83           | 2.01E-03 | 94.5       | 57.0       | 84.8       | 80.5        | 80.7        | 83.3        | 80.3        | 118.6   | 95.6    | 126.7   | 93.9     | 156.5    | 118.1    | 117.4    | 80.7          | 118.1      | 1.5         |  |
| 242649_x_at  | C15orf21           | 7.01E-05 | 25.2       | 22.4       | 31.9       | 33.4        | 38.1        | 18.5        | 87.2        | 74.3    | 85.8    | 317.9   | 177.5    | 132.0    | 97.6     | 219.3    | 31.9          | 132.0      | 4.1         |  |
| 215087_at    | C15orf39           | 4.84E-03 | 75.2       | 63.7       | 65.9       | 85.1        | 83.6        | 71.3        | 67.5        | 83.8    | 102.3   | 127.4   | 95.3     | 110.7    | 110.3    | 125.3    | 71.3          | 110.3      | 1.5         |  |
| 223484_at    | C15orf48           | 1.36E-04 | 815.5      | 116.8      | 372.9      | 380.3       | 795.6       | 95.5        | 1225.8      | 3655.8  | 3513.1  | 5866.1  | 3949.0   | 4021.4   | 3140.7   | 5492.1   | 380.3         | 3949.0     | 10.4        |  |
| 1554016_a_at | C16orf67           | 7.36E-03 | 196.1      | 197.9      | 213.0      | 220.7       | 236.9       | 191.1       | 261.5       | 288.7   | 236.9   | 275.7   | 318.1    | 293.3    | 279.1    | 270.5    | 213.0         | 279.1      | 1.3         |  |
| 226608_at    | C16orf87           | 7.93E-03 | 50.8       | 55.1       | 96.2       | 99.3        | 90.7        | 93.1        | 96.3        | 93.0    | 126.7   | 211.0   | 142.2    | 95.7     | 100.9    | 143.9    | 93.1          | 126.7      | 1.4         |  |
| 224574_at    | C17orf49           | 7.35E-03 | 421.1      | 296.8      | 355.3      | 444.3       | 421.8       | 320.2       | 437.6       | 534.8   | 333.2   | 524.4   | 512.1    | 801.0    | 687.4    | 615.7    | 421.1         | 534.8      | 1.3         |  |
| 214696_at    | C17orf91           | 8.76E-04 | 586.7      | 479.6      | 490.2      | 550.8       | 648.5       | 415.5       | 726.3       | 741.1   | 788.5   | 1369.2  | 903.9    | 1089.7   | 784.5    | 1191.7   | 550.8         | 903.9      | 1.6         |  |
| 228066_at    | C17orf96           | 1.17E-04 | 61.4       | 45.0       | 64.2       | 62.3        | 76.6        | 38.2        | 62.7        | 108.4   | 113.9   | 300.8   | 129.2    | 235.2    | 145.0    | 262.5    | 62.3          | 145.0      | 2.3         |  |
| 1553686_at   | C18orf25           | 9.92E-03 | 106.3      | 76.5       | 80.9       | 96.3        | 88.9        | 98.6        | 115.8       | 111.4   | 89.7    | 113.7   | 131.4    | 124.2    | 113.7    | 154.5    | 96.3          | 113.7      | 1.2         |  |
| 223983_s_at  | C19orf12           | 5.51E-03 | 251.1      | 238.8      | 358.6      | 263.7       | 367.2       | 291.6       | 377.4       | 392.0   | 295.2   | 539.1   | 344.1    | 386.4    | 433.6    | 469.8    | 291.6         | 392.0      | 1.3         |  |
| 221764_at    | C19orf22           | 1.54E-04 | 257.1      | 230.8      | 293.8      | 347.7       | 282.3       | 258.7       | 317.6       | 376.0   | 394.9   | 624.0   | 506.2    | 558.4    | 494.9    | 525.3    | 282.3         | 506.2      | 1.8         |  |
| 1555491_a_at | C19orf66           | 2.79E-04 | 254.4      | 158.3      | 284.1      | 306.1       | 241.9       | 219.5       | 246.4       | 389.6   | 389.4   | 763.3   | 423.4    | 611.1    | 631.6    | 705.4    | 246.4         | 611.1      | 2.5         |  |
| 218429_s_at  | C19orf66           | 1.76E-05 | 243.1      | 202.8      | 336.0      | 287.0       | 230.4       | 236.5       | 268.9       | 468.1   | 569.3   | 923.9   | 549.5    | 645.6    | 608.6    | 790.1    | 243.1         | 608.6      | 2.5         |  |
| 53720_at     | C19orf66           | 9.03E-06 | 368.9      | 401.2      | 431.7      | 412.8       | 434.1       | 372.2       | 408.1       | 874.7   | 1010.9  | 1493.3  | 939.5    | 1129.3   | 898.1    | 1332.1   | 408.1         | 1010.9     | 2.5         |  |
| 219439_at    | C1GALT1            | 2.15E-03 | 125.1      | 173.5      | 249.6      | 177.7       | 174.9       | 210.8       | 223.4       | 244.0   | 292.6   | 498.3   | 378.9    | 236.2    | 231.8    | 310.8    | 177.7         | 292.6      | 1.6         |  |
| 206721_at    | C1orf114           | 5.56E-03 | 44.4       | 43.7       | 50.6       | 53.2        | 52.2        | 58.0        | 47.3        | 53.6    | 79.3    | 75.8    | 55.9     | 75.5     | 80.0     | 63.1     | 50.6          | 75.5       | 1.5         |  |
| 225480_at    | C1orf122           | 9.97E-05 | 321.4      | 278.2      | 295.0      | 340.3       | 379.9       | 325.7       | 402.4       | 502.5   | 463.6   | 556.9   | 546.5    | 753.2    | 726.7    | 641.6    | 325.7         | 556.9      | 1.7         |  |
| 223063_at    | C1orf198           | 9.63E-03 | 134.6      | 124.6      | 177.9      | 162.6       | 197.2       | 171.3       | 193.7       | 205.1   | 149.4   | 251.3   | 191.7    | 222.2    | 225.4    | 220.7    | 171.3         | 220.7      | 1.3         |  |
| 244379_at    | C1orf224           | 3.99E-04 | 40.2       | 27.8       | 35.5       | 49.2        | 49.0        | 38.0        | 34.9        | 67.5    | 47.7    | 105.2   | 68.4     | 106.1    | 100.0    | 102.4    | 38.0          | 100.0      | 2.6         |  |
| 1555225_at   | C1orf43            | 4.73E-03 | 150.1      | 126.0      | 231.8      | 234.3       | 227.5       | 190.2       | 219.8       | 211.8   | 200.2   | 379.1   | 308.0    | 235.1    | 300.1    | 267.2    | 219.8         | 267.2      | 1.2         |  |
| 225564_at    | C1QTNF9            | 5.35E-03 | 695.0      | 793.2      | 1027.7     | 624.7       | 994.3       | 725.0       | 1068.2      | 1002.9  | 1087.9  | 1380.8  | 1038.4   | 1261.8   | 785.3    | 1282.2   | 793.2         | 1087.9     | 1.4         |  |
| /// SPATA13  |                    |          |            |            |            |             |             |             |             |         |         |         |          |          |          |          |               |            |             |  |
| 212067_s_at  | C1R                | 6.41E-03 | 88.5       | 68.7       | 80.6       | 77.1        | 72.6        | 68.4        | 77.3        | 94.8    | 92.4    | 128.5   | 98.2     | 98.9     | 81.0     | 102.2    | 77.1          | 98.2       | 1.3         |  |
| 202357_s_at  | C2 /// CFB         | 3.58E-06 | 184.9      | 179.3      | 234.4      | 226.8       | 315.5       | 160.1       | 200.9       | 808.3   | 1188.9  | 1442.1  | 1005.7   | 1301.3   | 1079.1   | 1648.8   | 200.9         | 1188.9     | 5.9         |  |
| 231991_at    | C20orf160          | 1.06E-04 | 96.2       | 65.2       | 35.3       | 72.7        | 99.1        | 31.7        | 107.4       | 396.7   | 227.5   | 591.9   | 471.2    | 424.2    | 525.3    | 536.0    | 72.7          | 471.2      | 6.5         |  |
| 229899_s_at  | C20orf199          | 7.85E-03 | 46.1       | 55.2       | 92.1       | 64.5        | 67.7        | 48.7        | 63.2        | 79.1    | 57.2    | 127.3   | 104.9    | 94.2     | 79.3     | 67.8     | 63.2          | 79.3       | 1.3         |  |
| 221211_s_at  | C21orf7            | 1.45E-04 | 55.4       | 231.1      | 82.1       | 105.2       | 95.9        | 86.1        | 121.2       | 135.1   | 425.7   | 296.9   | 413.5    | 196.5    | 174.4    | 492.1    | 95.9          | 296.9      | 3.1         |  |
| 1556414_at   | C21orf71           | 9.23E-03 | 78.6       | 65.9       | 62.8       | 57.8        | 61.8        | 48.3        | 54.3        | 74.9    | 113.6   | 302.2   | 105.8    | 96.0     | 82.7     | 116.0    | 61.8          | 105.8      | 1.7         |  |

Supplementary Table S1. Continued.

| ID           | Gene Symbol                   | p-value  | VW3_Saline | VW6_Saline | VW7_Saline | VW13_Saline | VW22_Saline | VW23_Saline | VW25_Saline | VW3_LPS | VW6_LPS | VW7_LPS | VW13_LPS | VW22_LPS | VW23_LPS | VW25_LPS | Median_saline | Median_LPS | Fold change |  |
|--------------|-------------------------------|----------|------------|------------|------------|-------------|-------------|-------------|-------------|---------|---------|---------|----------|----------|----------|----------|---------------|------------|-------------|--|
| 230405_at    | C5orf56                       | 1.93E-04 | 179.6      | 245.7      | 225.9      | 193.3       | 252.5       | 182.9       | 218.2       | 302.5   | 380.7   | 512.1   | 343.9    | 363.4    | 332.2    | 501.8    | 218.2         | 363.4      | 1.7         |  |
| 212923_s_at  | C6orf145                      | 4.56E-03 | 955.5      | 675.2      | 783.0      | 790.0       | 829.2       | 608.5       | 853.6       | 1023.1  | 1198.6  | 1304.2  | 943.2    | 1051.0   | 1083.0   | 1299.7   | 790.0         | 1083.0     | 1.4         |  |
| 1560838_at   | C6orf146                      | 8.26E-03 | 58.1       | 61.1       | 65.2       | 49.4        | 64.4        | 51.6        | 60.8        | 62.9    | 98.5    | 110.5   | 86.7     | 70.8     | 65.5     | 79.3     | 60.8          | 79.3       | 1.3         |  |
| 1559051_s_at | C6orf150                      | 1.85E-04 | 237.8      | 269.7      | 360.3      | 358.2       | 339.7       | 260.0       | 329.6       | 425.7   | 596.9   | 967.5   | 557.4    | 526.0    | 528.7    | 566.4    | 329.6         | 557.4      | 1.7         |  |
| 222309_at    | C6orf62                       | 6.97E-03 | 40.3       | 34.6       | 83.7       | 70.1        | 66.6        | 74.0        | 82.0        | 79.0    | 43.7    | 207.7   | 113.1    | 90.4     | 92.2     | 93.2     | 70.1          | 92.2       | 1.3         |  |
| 220231_at    | C7orf16                       | 5.94E-03 | 70.5       | 73.9       | 22.2       | 50.2        | 31.0        | 42.6        | 44.1        | 50.3    | 112.5   | 465.1   | 323.3    | 192.9    | 302.5    | 525.0    | 44.1          | 302.5      | 6.9         |  |
| 231509_at    | C7orf16                       | 4.36E-03 | 44.5       | 32.5       | 27.4       | 25.2        | 30.0        | 20.2        | 23.8        | 37.5    | 53.9    | 201.1   | 119.0    | 87.1     | 143.4    | 223.2    | 27.4          | 119.0      | 4.3         |  |
| 208310_s_at  | C7orf28A                      | 2.04E-03 | 595.5      | 658.7      | 685.6      | 726.8       | 764.6       | 696.4       | 735.4       | 847.9   | 824.2   | 990.2   | 900.1    | 968.4    | 998.0    | 920.4    | 696.4         | 920.4      | 1.3         |  |
|              | /// C7orf28B                  |          |            |            |            |             |             |             |             |         |         |         |          |          |          |          |               |            |             |  |
| 201973_s_at  | C7orf28A                      | 7.78E-03 | 3358.9     | 3807.4     | 3545.7     | 3573.5      | 4082.4      | 3788.1      | 4077.7      | 4148.6  | 4744.1  | 4785.4  | 4534.8   | 4544.1   | 4690.2   | 4849.0   | 3788.1        | 4690.2     | 1.2         |  |
|              | /// C7orf28B /// LOC100133775 |          |            |            |            |             |             |             |             |         |         |         |          |          |          |          |               |            |             |  |
| 225699_at    | C7orf40                       | 3.93E-05 | 113.5      | 139.0      | 172.5      | 156.0       | 159.2       | 157.4       | 173.7       | 244.8   | 236.0   | 360.4   | 274.3    | 267.1    | 278.0    | 381.7    | 157.4         | 274.3      | 1.7         |  |
| 228149_at    | C7orf60                       | 1.93E-04 | 171.3      | 140.2      | 309.9      | 242.8       | 412.7       | 228.2       | 421.3       | 404.0   | 368.9   | 882.2   | 651.8    | 605.1    | 526.1    | 646.1    | 242.8         | 605.1      | 2.5         |  |
| 1554228_a_at | C8orf56                       | 4.02E-04 | 38.6       | 33.5       | 44.1       | 34.4        | 36.5        | 34.3        | 41.5        | 47.5    | 57.9    | 80.4    | 50.0     | 66.2     | 58.4     | 63.0     | 36.5          | 58.4       | 1.6         |  |
| 227534_at    | C9orf21                       | 2.18E-03 | 546.2      | 440.7      | 523.8      | 541.5       | 605.2       | 496.6       | 660.1       | 747.6   | 699.5   | 1126.6  | 693.8    | 787.9    | 824.4    | 860.7    | 541.5         | 787.9      | 1.5         |  |
| 218992_at    | C9orf46                       | 6.71E-04 | 105.7      | 95.8       | 138.7      | 124.9       | 141.1       | 116.7       | 163.2       | 204.5   | 114.7   | 270.5   | 194.0    | 206.8    | 185.1    | 258.5    | 124.9         | 204.5      | 1.6         |  |
| 221865_at    | C9orf91                       | 8.98E-06 | 59.7       | 70.8       | 129.3      | 112.7       | 102.8       | 82.9        | 110.8       | 173.1   | 212.4   | 497.9   | 271.2    | 256.0    | 192.3    | 296.2    | 102.8         | 256.0      | 2.5         |  |
| 203963_at    | CA12                          | 1.30E-03 | 35.8       | 22.1       | 27.2       | 22.9        | 42.9        | 21.4        | 53.0        | 72.3    | 47.8    | 57.7    | 122.5    | 62.6     | 131.4    | 145.9    | 27.2          | 72.3       | 2.7         |  |
| 210735_s_at  | CA12                          | 1.40E-03 | 46.7       | 41.0       | 31.5       | 28.8        | 33.6        | 36.8        | 45.1        | 49.2    | 68.2    | 47.0    | 52.2     | 57.3     | 64.5     | 66.0     | 36.8          | 57.3       | 1.6         |  |
| 214164_x_at  | CA12                          | 1.24E-04 | 64.6       | 55.2       | 46.3       | 56.5        | 49.1        | 47.0        | 78.4        | 101.5   | 97.5    | 85.4    | 116.9    | 79.1     | 126.5    | 165.0    | 55.2          | 101.5      | 1.8         |  |
| 215867_x_at  | CA12                          | 4.16E-04 | 47.2       | 46.5       | 32.1       | 37.6        | 39.5        | 37.6        | 60.2        | 95.5    | 61.4    | 69.0    | 136.9    | 78.7     | 104.7    | 121.7    | 39.5          | 95.5       | 2.4         |  |
| 214933_at    | CACNA1A                       | 3.79E-03 | 65.6       | 76.2       | 42.7       | 55.6        | 52.3        | 48.7        | 36.1        | 88.3    | 96.2    | 89.8    | 68.3     | 67.4     | 67.6     | 58.6     | 52.3          | 68.3       | 1.3         |  |
| 210817_s_at  | CALCOCO2                      | 4.50E-03 | 722.0      | 768.9      | 769.8      | 717.6       | 848.8       | 767.3       | 796.7       | 923.9   | 995.0   | 1210.7  | 927.4    | 959.3    | 960.0    | 1033.5   | 768.9         | 960.0      |             |  |
| 1.2221732_at | CANT1                         | 4.87E-03 | 160.7      | 161.5      | 254.4      | 224.2       | 288.9       | 217.4       | 265.9       | 340.0   | 242.9   | 343.8   | 270.1    | 361.0    | 303.0    | 335.2    | 224.2         | 335.2      | 1.5         |  |
| 208683_at    | CAPN2                         | 4.24E-04 | 1317.8     | 1391.9     | 1000.1     | 1263.7      | 1531.5      | 1015.3      | 1197.3      | 1892.4  | 1806.3  | 1859.4  | 1920.4   | 2321.1   | 1888.8   | 2315.8   | 1263.7        | 1892.4     | 1.5         |  |
| 209970_x_at  | CASP1                         | 7.59E-03 | 1885.4     | 2609.5     | 2709.1     | 2258.7      | 2585.7      | 2119.4      | 2283.3      | 2407.9  | 3349.0  | 4021.1  | 3011.7   | 2815.3   | 2397.4   | 3020.6   | 2283.3        | 3011.7     | 1.3         |  |
| 211367_s_at  | CASP1                         | 8.12E-03 | 1502.3     | 1830.1     | 1772.0     | 1736.9      | 1650.0      | 1457.1      | 1573.4      | 1673.0  | 2286.0  | 2762.6  | 2010.2   | 1977.9   | 1956.5   | 2105.4   | 1650.0        | 2010.2     | 1.2         |  |
| 205467_at    | CASP10                        | 5.52E-03 | 328.4      | 374.9      | 448.7      | 406.2       | 402.7       | 432.5       | 334.7       | 437.2   | 566.8   | 717.8   | 534.9    | 442.5    | 485.8    | 560.6    | 402.7         | 534.9      | 1.3         |  |
| 202763_at    | CASP3                         | 2.08E-03 | 74.3       | 85.7       | 106.5      | 107.1       | 119.9       | 102.0       | 92.9        | 119.6   | 92.0    | 163.8   | 149.9    | 156.7    | 153.9    | 152.9    | 102.0         | 152.9      | 1.5         |  |
| 209310_s_at  | CASP4                         | 9.56E-04 | 3131.1     | 2350.5     | 2553.6     | 2698.4      | 2821.8      | 2238.3      | 3012.4      | 3740.6  | 4132.0  | 4860.7  | 3523.7   | 4171.1   | 3832.2   | 4922.2   | 2698.4        | 4132.0     | 1.5         |  |
| 213596_at    | CASP4                         | 1.24E-03 | 417.8      | 419.6      | 399.8      | 439.9       | 329.2       | 292.4       | 425.4       | 469.4   | 671.7   | 850.7   | 679.7    | 468.8    | 486.0    | 729.2    | 417.8         | 671.7      | 1.6         |  |
| 207500_at    | CASP5                         | 5.61E-05 | 284.9      | 128.5      | 265.5      | 297.2       | 283.5       | 297.2       | 391.3       | 515.4   | 371.5   | 705.9   | 587.6    | 497.4    | 766.1    | 786.9    | 284.9         | 587.6      | 2.1         |  |
| 207181_s_at  | CASP7                         | 3.95E-03 | 710.6      | 1073.5     | 851.0      | 984.0       | 1017.1      | 858.8       | 1177.3      | 916.9   | 1594.9  | 2125.1  | 1763.4   | 1310.0   | 1047.0   | 1816.7   | 984.0         | 1594.9     | 1.6         |  |
| 243386_at    | CAS21                         | 8.06E-03 | 43.8       | 44.7       | 34.5       | 43.4        | 60.6        | 41.4        | 47.3        | 96.7    | 49.5    | 89.0    | 59.3     | 67.4     | 64.3     | 76.6     | 43.8          | 67.4       | 1.5         |  |
| 235221_at    | CBLN3                         | 2.26E-03 | 44.1       | 73.5       | 74.4       | 101.1       | 89.6        | 63.5        | 77.1        | 87.6    | 114.1   | 139.9   | 158.3    | 125.3    | 76.3     | 91.9     | 74.4          | 114.1      | 1.5         |  |
| 226193_x_at  | CBWD1                         | 3.23E-03 | 2280.5     | 2364.2     | 2067.2     | 1948.1      | 2105.6      | 2244.8      | 2160.6      | 2637.2  | 3039.8  | 3265.1  | 2555.2   | 2740.4   | 2796.7   | 3023.5   | 2160.6        | 2796.7     | 1.3         |  |
| 202047_s_at  | CBX6                          | 1.10E-03 | 136.5      | 97.0       | 175.3      | 169.7       | 146.9       | 110.9       | 187.2       | 168.7   | 142.2   | 279.3   | 206.6    | 218.7    | 188.7    | 277.3    | 146.9         | 206.6      | 1.4         |  |
| 218655_s_at  | CCDC49                        | 4.89E-03 | 178.5      | 171.8      | 212.1      | 209.6       | 235.0       | 209.1       | 214.0       | 218.7   | 229.8   | 288.2   | 240.2    | 292.0    | 269.0    | 262.4    | 209.6         | 262.4      | 1.3         |  |
| 225331_at    | CCDC50                        | 6.54E-04 | 917.4      | 1164.3     | 1196.9     | 1046.7      | 1255.4      | 1150.8      | 1150.4      | 1368.5  | 2548.2  | 3557.3  | 1910.0   | 1999.2   | 1601.7   | 2341.4   | 1150.8        | 1999.2     | 1.7         |  |
| 235051_at    | CCDC50                        | 1.32E-03 | 132.4      | 213.7      | 254.9      | 243.7       | 276.3       | 258.2       | 225.9       | 231.6   | 343.2   | 533.1   | 338.9    | 366.1    | 315.0    | 354.5    | 243.7         | 343.2      | 1.4         |  |
| 219774_at    | CCDC93                        | 2.51E-03 | 279.1      | 232.7      | 232.2      | 216.9       | 291.1       | 254.6       | 227.5       | 346.5   | 310.6   | 502.3   | 327.1    | 398.0    | 339.5    | 345.6    | 232.7         | 345.6      | 1.5         |  |
| 210390_s_at  | CCL14-<br>CCL15 /// CCL15     | 8.48E-05 | 71.9       | 51.0       | 65.1       | 37.3        | 159.0       | 24.6        | 115.7       | 262.6   | 339.8   | 1254.9  | 226.5    | 465.4    | 181.6    | 613.6    | 65.1          | 339.8      | 5.2         |  |
| 210072_at    | CCL19                         | 1.24E-03 | 63.4       | 48.6       | 45.3       | 56.1        | 42.5        | 34.1        | 52.6        | 90.0    | 72.1    | 61.6    | 96.3     | 101.3    | 87.3     | 81.1     | 48.6          | 87.3       | 1.8         |  |
| 216598_s_at  | CCL2                          | 3.33E-05 | 1005.9     | 339.2      | 218.2      | 374.6       | 228.9       | 92.1        | 742.7       | 4754.5  | 2430.9  | 2280.2  | 3119.7   | 5778.3   | 2893.7   | 6358.4   | 339.2         | 3119.7     | 9.2         |  |
| 205476_at    | CCL20                         | 5.12E-04 | 586.7      | 69.0       | 428.4      | 291.6       | 1401.5      | 220.9       | 1399.0      | 2712.3  | 5705.1  | 7975.7  | 3611.3   | 5128.5   | 5171.0   | 6032.8   | 428.4         | 5171.0     | 12.1        |  |
| 207861_at    | CCL22                         | 3.91E-05 | 115.3      | 87.6       | 70.5       | 88.8        | 148.7       | 89.3        | 112.4       | 293.9   | 186.6   | 375.3   | 361.8    | 385.0    | 283.3    | 435.0    | 89.3          | 361.8      | 4.1         |  |
| 210548_at    | CCL23                         | 4.07E-05 | 298.1      | 156.8      | 305.5      | 315.0       | 732.8       | 124.1       | 503.4       | 880.6   | 520.8   | 1809.0  | 1412.4   | 2022.9   | 926.0    | 1474.0   | 305.5         | 1412.4     | 4.6         |  |
| 210549_s_at  | CCL23                         | 3.83E-04 | 1003.7     | 484.1      | 728.3      | 869.2       | 1757.6      | 226.9       | 1223.5      | 2116.7  | 1632.5  | 4006.3  | 3306.8   | 4073.2   | 2425.8   | 3413.6   | 869.2         | 3306.8     | 3.8         |  |
| 205114_s_at  | CCL3 ///<br>CCL3L1 /// CCL3L3 | 3.46E-04 | 564.2      | 95.1       | 488.2      | 439.8       | 1750.3      | 337.5       | 2629.2      | 3411.1  | 5254.6  | 8224.9  | 5004.2   | 6462.8   | 7365.3   | 8522.1   | 488.2         | 6462.8     | 13.2        |  |
| 204103_at    | CCL4                          | 9.46E-04 | 2691.4     | 521.6      | 2427.6     | 1777.2      | 5768.4      | 1338.0      | 5565.2      | 8562.9  | 9931.8  | 13337.0 | 10437.5  | 11312.7  | 10612.6  | 11792.1  | 2427.6        | 10612.6    | 4.4         |  |
| 1405_i_at    | CCL5                          | 8.15E-06 | 59.0       | 59.9       | 64.3       | 53.3        | 101.3       | 126.1       | 95.0        | 270.6   | 399.6   | 525.2   | 426.0    | 446.5    | 439.1    | 839.3    | 64.3          | 439.1      | 6.8         |  |
| 1555759_a_at | CCL5                          | 1.08E-05 | 114.8      | 100.1      | 63.6       | 99.2        | 122.5       | 151.3       | 109.2       | 414.5   | 447.3   | 494.5   | 453.6    | 677.1    | 515.5    | 908.4    | 109.2         | 494.5      | 4.5         |  |
| 204655_at    | CCL5                          | 7.57E-06 | 51.5       | 68.4       | 88.5       | 78.7        | 97.4        | 117.1       | 77.9        | 227.4   | 327.1   | 455.4   | 368.7    | 421.7    | 330.3    | 604.2    | 78.7          | 368.7      | 4.7         |  |
| 208075_s_at  | CCL7                          | 1.15E-05 | 47.6       | 29.2       | 23.3       | 29.7        | 30.1        | 19.5        | 46.7        | 222.4   | 105.9   | 156.3   | 279.7    | 419.4    | 156.4    | 349.8    | 29.7          | 222.4      | 7.5         |  |
| 214038_at    | CCL8                          | 1.15E-05 | 74.3       | 85.0       | 55.6       | 21.9        | 31.2        | 23.4        | 75.2        | 558.3   | 652.7   | 1154.6  | 1051.3   | 804.8    | 508.3    | 2091.8   | 55.6          | 804.8      | 14.5        |  |
| 205899_at    | CCNA1                         | 1.12E-05 | 25.8       | 24.0       | 29.4       | 20.9        | 33.4        | 21.7        | 28.9        | 80.4    | 213.9   | 365.8   | 141.2    | 186.1    | 176.4    | 222.7    | 25.8          | 186.1      | 7.2         |  |
| 200953_s_at  | CCND2                         | 1.11E-03 | 251.0      | 235.0      | 264.2      | 381.4       | 262.6       | 163.9       | 290.4       | 382.6   | 272.5   | 409.5   | 767.4    | 432.8    | 367.8    | 692.9    | 262.6         | 409.5      | 1.6         |  |
| 227280_s_at  | CCNYL1                        | 5.65E-03 | 116.2      | 143.7      | 195.8      | 175.6       | 231.5       | 209.3       | 210.7       | 216.2   | 220.1   | 408.5   | 307.2    | 260.1    | 224.0    | 289.2    | 195.8         | 260.1      | 1.3         |  |
| 228810_at    | CCNYL1                        | 8.02E-05 | 39.1       | 40.6       | 83.0       | 72.6        | 83.3        | 67.9        | 74.0        | 108.1   | 108.9   | 242.1   | 167.2    | 137.9    | 122.2    | 140.2    | 72.6          | 137.9      | 1.9         |  |
| 205099_s_at  | CCR1                          | 7.14E-04 | 779.8      | 622.0      | 675.1      | 1089.0      | 879.4       | 637.0       |             |         |         |         |          |          |          |          |               |            |             |  |



TRANSCRIPTION PROFILES IN ALVEOLAR MACROPHAGES

Supplementary Table S1. Continued.

| ID           | Gene Symbol | p-value  | VW3_Saline | VW6_Saline | VW7_Saline | VW13_Saline | VW22_Saline | VW23_Saline | VW25_Saline | VW3_LPS | VW6_LPS | VW7_LPS | VW13_LPS | VW22_LPS | VW23_LPS | VW25_LPS | Median_saline | Median_LPS | Fold change |
|--------------|-------------|----------|------------|------------|------------|-------------|-------------|-------------|-------------|---------|---------|---------|----------|----------|----------|----------|---------------|------------|-------------|
| 1554283_at   | CCRN4L      | 1.95E-04 | 73.0       | 111.4      | 75.1       | 93.6        | 108.6       | 91.3        | 106.3       | 139.9   | 348.7   | 390.4   | 213.5    | 339.3    | 175.5    | 489.4    | 93.6          | 339.3      | 3.6         |
| 220671_at    | CCRN4L      | 3.91E-05 | 72.1       | 74.2       | 94.4       | 82.7        | 95.9        | 86.6        | 95.8        | 152.6   | 182.6   | 196.3   | 146.0    | 264.5    | 166.1    | 287.3    | 86.6          | 182.6      | 2.1         |
| 205987_at    | CD1C        | 1.53E-03 | 109.1      | 64.6       | 38.3       | 84.7        | 87.0        | 72.7        | 121.1       | 239.7   | 79.1    | 78.3    | 209.3    | 179.5    | 96.4     | 171.6    | 84.7          | 171.6      | 2.0         |
| 207315_at    | CD226       | 3.55E-03 | 64.1       | 51.6       | 39.6       | 59.0        | 48.1        | 48.0        | 38.3        | 72.8    | 62.8    | 53.1    | 88.2     | 76.1     | 67.7     | 75.2     | 48.1          | 72.8       | 1.5         |
| 208650_s_at  | CD24        | 9.55E-03 | 39.3       | 78.4       | 44.1       | 55.0        | 24.4        | 41.6        | 25.2        | 81.8    | 168.2   | 52.6    | 101.0    | 92.0     | 50.0     | 29.2     | 41.6          | 81.8       | 2.0         |
| 210031_at    | CD247       | 3.38E-03 | 53.8       | 67.1       | 47.8       | 77.0        | 51.7        | 51.6        | 53.9        | 81.9    | 68.7    | 65.2    | 130.9    | 71.9     | 75.6     | 102.5    | 53.8          | 75.6       | 1.4         |
| 223834_at    | CD274       | 1.94E-04 | 1092.4     | 616.1      | 1088.8     | 1383.7      | 1294.6      | 862.2       | 1514.5      | 2105.5  | 3117.3  | 3894.5  | 2926.7   | 2540.5   | 2681.3   | 3557.3   | 1092.4        | 2926.7     | 2.7         |
| 203593_at    | CD2AP       | 8.45E-03 | 159.1      | 165.3      | 254.6      | 246.6       | 260.1       | 262.1       | 299.1       | 273.5   | 358.2   | 488.5   | 380.5    | 307.2    | 278.6    | 347.8    | 254.6         | 347.8      | 1.4         |
| 205692_s_at  | CD38        | 2.97E-05 | 128.2      | 141.2      | 101.8      | 96.1        | 113.0       | 101.3       | 86.8        | 292.4   | 763.6   | 978.7   | 494.7    | 527.1    | 534.1    | 694.5    | 101.8         | 534.1      | 5.2         |
| 205153_s_at  | CD40        | 3.18E-05 | 417.2      | 268.7      | 315.1      | 453.3       | 474.1       | 198.2       | 399.5       | 895.7   | 1232.6  | 1452.0  | 1114.1   | 1606.1   | 1010.5   | 1322.8   | 399.5         | 1232.6     | 3.1         |
| 215346_at    | CD40        | 8.08E-05 | 1612.5     | 1301.8     | 1168.0     | 1611.4      | 1891.9      | 764.4       | 1714.1      | 2891.8  | 4163.5  | 4403.8  | 3535.0   | 3926.9   | 2692.0   | 4003.8   | 1611.4        | 3926.9     | 2.4         |
| 222292_at    | CD40        | 2.07E-04 | 123.9      | 89.3       | 180.7      | 187.7       | 178.0       | 87.3        | 180.3       | 214.4   | 220.8   | 556.5   | 323.0    | 279.8    | 231.6    | 352.8    | 178.0         | 279.8      | 1.6         |
| 35150_at     | CD40        | 4.88E-05 | 418.7      | 290.3      | 294.6      | 448.0       | 428.2       | 195.2       | 403.7       | 798.9   | 1209.8  | 1412.2  | 1055.4   | 1479.7   | 894.0    | 1297.4   | 403.7         | 1209.8     | 3.0         |
| 1557905_s_at | CD44        | 1.16E-03 | 10023.8    | 7131.9     | 8254.4     | 10232.3     | 9999.3      | 9142.9      | 9810.3      | 12207.2 | 11658.5 | 13624.6 | 13371.5  | 13208.6  | 13094.2  | 14509.9  | 9810.3        | 13208.6    | 1.3         |
| 1565868_at   | CD44        | 2.20E-04 | 51.9       | 65.0       | 78.9       | 95.5        | 96.0        | 87.2        | 94.1        | 77.5    | 131.2   | 246.8   | 243.6    | 162.4    | 183.3    | 174.2    | 87.2          | 174.2      | 2.0         |
| 204489_s_at  | CD44        | 6.85E-03 | 5691.9     | 4203.2     | 5306.2     | 6422.1      | 6196.0      | 5862.0      | 6458.0      | 6579.9  | 7044.2  | 8490.8  | 8092.4   | 6951.4   | 7329.9   | 8714.0   | 5862.0        | 7329.9     | 1.3         |
| 204490_s_at  | CD44        | 8.47E-04 | 8790.3     | 6243.5     | 7249.8     | 8412.9      | 8909.6      | 7760.0      | 8928.9      | 11014.3 | 11715.9 | 14059.0 | 12599.0  | 11869.8  | 12327.7  | 13359.0  | 8412.9        | 12327.7    | 1.5         |
| 209835_x_at  | CD44        | 5.22E-04 | 8919.0     | 6302.3     | 7545.2     | 8395.3      | 8726.4      | 7710.2      | 8662.4      | 11112.3 | 11928.0 | 13463.7 | 12310.9  | 12263.3  | 12623.0  | 14206.2  | 8395.3        | 12310.9    | 1.5         |
| 210916_s_at  | CD44        | 3.83E-04 | 5590.2     | 3416.7     | 4355.7     | 5082.0      | 5230.3      | 4443.8      | 5282.9      | 6957.6  | 6025.0  | 6984.7  | 7228.2   | 9063.0   | 8409.8   | 8590.7   | 5082.0        | 7228.2     | 1.4         |
| 212014_x_at  | CD44        | 5.15E-04 | 9323.5     | 6794.6     | 7666.7     | 9189.3      | 8917.7      | 7935.0      | 8869.1      | 11598.6 | 12195.5 | 14383.7 | 12841.6  | 13096.7  | 13473.0  | 14792.8  | 8869.1        | 13096.7    | 1.5         |
| 212063_at    | CD44        | 9.95E-03 | 4473.9     | 3941.6     | 5523.7     | 6527.0      | 6085.5      | 5868.3      | 6857.0      | 5903.8  | 6210.6  | 8118.9  | 8298.0   | 6612.0   | 6964.2   | 7762.5   | 5868.3        | 6964.2     | 1.2         |
| 216056_at    | CD44        | 2.15E-04 | 90.2       | 96.9       | 114.3      | 146.7       | 133.4       | 118.8       | 145.6       | 116.5   | 202.9   | 332.7   | 367.9    | 264.6    | 248.7    | 293.3    | 118.8         | 264.6      | 2.2         |
| 217523_at    | CD44        | 3.36E-05 | 77.8       | 49.7       | 106.4      | 128.4       | 142.6       | 106.0       | 141.6       | 137.0   | 137.9   | 318.0   | 294.6    | 283.4    | 233.2    | 294.0    | 106.4         | 283.4      | 2.7         |
| 229221_at    | CD44        | 1.27E-05 | 70.8       | 62.3       | 100.3      | 115.5       | 157.4       | 104.5       | 140.9       | 260.9   | 457.0   | 650.6   | 385.6    | 486.4    | 456.3    | 544.4    | 104.5         | 457.0      | 4.4         |
| 234418_x_at  | CD44        | 3.26E-04 | 59.1       | 35.0       | 109.4      | 119.6       | 117.5       | 80.2        | 107.4       | 88.0    | 130.8   | 245.8   | 240.2    | 250.1    | 189.4    | 180.5    | 107.4         | 189.4      | 1.8         |
| 211075_s_at  | CD47        | 8.67E-04 | 4123.2     | 3173.1     | 3129.1     | 3090.5      | 3829.4      | 2808.2      | 3536.5      | 4843.2  | 5537.9  | 6445.3  | 5807.0   | 5152.1   | 5475.5   | 5764.6   | 3173.1        | 5537.9     | 1.7         |
| 213856_at    | CD47        | 8.48E-03 | 21.9       | 40.1       | 61.5       | 43.3        | 68.4        | 57.9        | 61.2        | 63.6    | 62.8    | 144.4   | 111.4    | 72.3     | 68.9     | 81.0     | 57.9          | 72.3       | 1.2         |
| 213857_s_at  | CD47        | 3.03E-03 | 4793.3     | 4966.5     | 5527.8     | 5152.6      | 5864.9      | 5154.8      | 6251.8      | 5737.2  | 7844.9  | 9233.1  | 8487.1   | 6638.6   | 7574.1   | 7984.7   | 5154.8        | 7844.9     | 1.5         |
| 227259_at    | CD47        | 8.22E-03 | 621.2      | 398.1      | 462.3      | 752.7       | 519.1       | 594.6       | 538.1       | 683.8   | 493.8   | 576.4   | 904.7    | 635.1    | 864.6    | 686.1    | 538.1         | 683.8      | 1.3         |
| 242974_at    | CD47        | 5.17E-04 | 91.8       | 113.1      | 182.8      | 149.3       | 199.8       | 158.5       | 204.7       | 180.8   | 175.8   | 416.3   | 300.8    | 280.0    | 222.6    | 309.7    | 158.5         | 280.0      | 1.8         |
| 204118_at    | CD48        | 1.15E-05 | 298.7      | 206.2      | 256.2      | 160.7       | 499.2       | 174.8       | 281.3       | 741.4   | 535.2   | 718.2   | 643.8    | 1236.7   | 697.0    | 999.0    | 256.2         | 718.2      | 2.8         |
| 237759_at    | CD48        | 6.73E-03 | 92.4       | 92.6       | 123.6      | 136.7       | 134.2       | 114.3       | 137.9       | 114.5   | 215.2   | 259.0   | 141.3    | 166.3    | 196.8    | 234.2    | 123.6         | 196.8      | 1.6         |
| 1555950_a_at | CD55        | 2.45E-03 | 1890.1     | 1124.1     | 1192.5     | 2056.2      | 2218.0      | 1349.6      | 1772.6      | 2367.9  | 2192.2  | 3743.4  | 2747.9   | 3475.8   | 3451.5   | 2932.8   | 1772.6        | 2932.8     | 1.7         |
| 201926_s_at  | CD55        | 7.47E-04 | 1577.0     | 1023.3     | 986.6      | 1637.5      | 1923.5      | 1261.8      | 1501.3      | 2343.3  | 2059.2  | 3134.4  | 2454.0   | 3163.3   | 2972.9   | 2472.2   | 1501.3        | 2472.2     | 1.6         |
| 211744_s_at  | CD58        | 1.69E-03 | 331.4      | 455.0      | 445.9      | 644.8       | 695.4       | 427.6       | 713.9       | 752.8   | 644.4   | 840.5   | 854.8    | 898.2    | 781.8    | 974.9    | 455.0         | 840.5      | 1.8         |
| 216322_at    | CD58        | 5.50E-03 | 190.4      | 180.0      | 235.3      | 323.4       | 324.3       | 210.1       | 408.7       | 417.1   | 256.9   | 513.5   | 466.1    | 374.3    | 355.8    | 450.8    | 235.3         | 417.1      | 1.8         |
| 216942_s_at  | CD58        | 2.34E-03 | 463.3      | 415.1      | 447.0      | 685.5       | 701.4       | 452.9       | 749.6       | 804.0   | 628.8   | 927.6   | 953.1    | 813.1    | 829.6    | 933.1    | 463.3         | 829.6      | 1.8         |
| 209795_at    | CD69        | 2.16E-03 | 127.0      | 107.7      | 82.3       | 143.6       | 105.9       | 225.8       | 143.2       | 207.6   | 338.1   | 864.6   | 372.3    | 287.6    | 344.2    | 661.1    | 127.0         | 344.2      | 2.7         |
| 1554519_at   | CD80        | 2.11E-05 | 907.9      | 947.4      | 810.0      | 989.6       | 1275.5      | 799.3       | 1075.8      | 2416.8  | 3887.0  | 5737.5  | 4600.6   | 3418.3   | 3847.5   | 4207.7   | 947.4         | 3887.0     | 4.1         |
| 1555689_at   | CD80        | 2.18E-05 | 8.5        | 14.8       | 14.6       | 20.2        | 26.5        | 18.6        | 33.7        | 54.8    | 89.3    | 248.7   | 149.5    | 102.7    | 100.8    | 151.5    | 18.6          | 102.7      | 5.5         |
| 207176_s_at  | CD80        | 6.17E-06 | 82.7       | 126.3      | 110.7      | 113.1       | 132.3       | 108.1       | 116.3       | 319.6   | 405.0   | 748.0   | 587.2    | 463.7    | 452.0    | 463.3    | 113.1         | 463.3      | 4.1         |
| 203904_x_at  | CD82        | 2.17E-03 | 103.2      | 52.8       | 107.1      | 108.6       | 92.8        | 78.4        | 115.4       | 122.7   | 73.5    | 191.7   | 144.6    | 180.6    | 203.7    | 206.0    | 103.2         | 180.6      | 1.8         |
| 202877_s_at  | CD93        | 1.10E-03 | 95.9       | 62.8       | 70.5       | 87.9        | 67.2        | 99.7        | 93.8        | 199.7   | 133.8   | 200.1   | 162.0    | 397.2    | 144.3    | 353.8    | 87.9          | 199.7      | 2.3         |
| 202878_s_at  | CD93        | 2.98E-04 | 280.9      | 207.6      | 293.4      | 379.5       | 238.0       | 456.2       | 397.7       | 885.4   | 841.2   | 918.4   | 759.7    | 1581.2   | 756.5    | 1935.2   | 293.4         | 885.4      | 3.0         |
| 210232_at    | CDC42       | 3.05E-03 | 116.7      | 107.2      | 147.6      | 141.7       | 146.3       | 126.3       | 161.9       | 162.1   | 181.8   | 263.1   | 220.6    | 159.5    | 159.9    | 218.8    | 141.7         | 181.8      | 1.3         |
| 209850_s_at  | CDC42EP2    | 4.65E-05 | 58.0       | 44.2       | 63.6       | 61.8        | 75.1        | 58.8        | 73.7        | 91.5    | 94.8    | 154.5   | 110.7    | 151.7    | 133.3    | 189.4    | 61.8          | 133.3      | 2.2         |
| 1552612_at   | CDC42SE2    | 2.67E-03 | 2149.7     | 1984.8     | 1904.1     | 1958.5      | 2293.7      | 1955.5      | 2161.1      | 2360.5  | 2683.1  | 3343.5  | 3017.6   | 2873.3   | 2895.4   | 3229.7   | 1984.8        | 2895.4     | 1.5         |
| 1552613_s_at | CDC42SE2    | 9.12E-04 | 723.1      | 767.7      | 921.5      | 862.9       | 968.1       | 918.5       | 1058.5      | 967.9   | 1169.4  | 1758.8  | 1584.1   | 1267.6   | 1326.2   | 1462.5   | 918.5         | 1326.2     | 1.4         |
| 226056_at    | CDGAP       | 2.69E-03 | 552.8      | 357.0      | 462.3      | 638.4       | 611.5       | 549.3       | 725.6       | 773.4   | 513.1   | 908.9   | 805.3    | 704.6    | 969.8    | 1033.9   | 552.8         | 805.3      | 1.5         |
| 226057_at    | CDGAP       | 4.37E-03 | 143.8      | 113.7      | 150.8      | 160.8       | 175.4       | 202.0       | 168.1       | 263.6   | 147.7   | 207.3   | 255.0    | 213.5    | 246.1    | 203.4    | 160.8         | 213.5      | 1.3         |
| 207766_at    | CDK1        | 2.57E-04 | 134.3      | 158.6      | 169.0      | 159.7       | 133.6       | 152.2       | 139.6       | 198.6   | 229.9   | 258.4   | 221.8    | 227.8    | 214.2    | 213.5    | 152.2         | 221.8      | 1.5         |
| 202284_s_at  | CDKN1A      | 6.16E-03 | 1156.9     | 882.3      | 1697.9     | 1278.1      | 1003.1      | 1092.9      | 1324.3      | 1603.7  | 1312.0  | 1922.5  | 1381.1   | 1721.1   | 1440.2   | 1833.1   | 1156.9        | 1603.7     | 1.4         |
| 212862_at    | CDS2        | 5.28E-03 | 541.4      | 417.1      | 489.4      | 504.3       | 505.8       | 417.2       | 411.6       | 601.1   | 665.1   | 681.9   | 540.9    | 698.1    | 643.6    | 618.3    | 489.4         | 643.6      | 1.3         |
| 203973_s_at  | CEBPD       | 1.05E-04 | 120.5      | 196.8      | 248.4      | 241.3       | 257.8       | 205.9       | 207.6       | 286.5   | 402.3   | 528.6   | 336.5    | 454.1    | 424.8    | 524.3    | 207.6         | 424.8      | 2.0         |
| 213003_s_at  | CEBPD       | 2.98E-05 | 124.9      | 193.9      | 215.1      | 202.8       | 200.6       | 184.4       | 185.6       | 265.0   | 368.1   | 496.5   | 320.8    | 436.5    | 431.6    | 461.6    | 193.9         | 431.6      | 2.2         |
| 222118_at    | CENPN       | 2.68E-03 | 131.0      | 132.3      | 143.8      | 141.7       | 149.0       | 127.4       | 148.4       | 228.6   | 192.2   | 313.1   | 213.0    | 190.6    | 144.7    | 223.8    | 141.7         | 213.0      | 1.5         |
| 204373_s_at  | CEP350      | 9.89E-03 | 151.6      | 264.3      | 346.9      | 340.5       | 417.5       | 421.5       | 501.8       | 254.5   | 337.7   | 484.8   | 491.8    | 469.3    | 541.1    | 523.2    | 346.9         | 484.8      | 1.4         |
| 213957_s_at  | CEP350      | 3.62E-03 | 201.8      | 205.1      | 232.0      | 260.5       | 360.3       | 307.        |             |         |         |         |          |          |          |          |               |            |             |

Supplementary Table S1. Continued.

| ID           | Gene Symbol | p-value  | VW3_Saline | VW6_Saline | VW7_Saline | VW13_Saline | VW22_Saline | VW23_Saline | VW25_Saline | VW3_LPS | VW6_LPS | VW7_LPS | VW13_LPS | VW22_LPS | VW23_LPS | VW25_LPS | Median_saline | Median_LPS | Fold change |  |
|--------------|-------------|----------|------------|------------|------------|-------------|-------------|-------------|-------------|---------|---------|---------|----------|----------|----------|----------|---------------|------------|-------------|--|
| 211862_x_at  | CFLAR       | 2.55E-05 | 500.4      | 412.4      | 483.0      | 494.5       | 619.9       | 485.1       | 586.3       | 915.4   | 1048.3  | 1555.3  | 999.1    | 1386.8   | 1241.1   | 1320.2   | 494.5         | 1241.1     | 2.5         |  |
| 214486_x_at  | CFLAR       | 4.32E-05 | 1438.0     | 1196.8     | 1413.8     | 1362.2      | 1561.0      | 1238.6      | 1253.2      | 2448.1  | 2807.5  | 3898.9  | 2528.6   | 3014.1   | 2823.9   | 3401.1   | 1362.2        | 2823.9     | 2.1         |  |
| 237367_x_at  | CFLAR       | 1.31E-03 | 130.8      | 124.1      | 162.5      | 144.7       | 161.1       | 135.6       | 155.2       | 163.3   | 158.7   | 253.0   | 191.0    | 214.6    | 218.1    | 223.1    | 144.7         | 214.6      | 1.5         |  |
| 239629_at    | CFLAR       | 1.00E-03 | 45.9       | 44.6       | 60.2       | 50.9        | 64.0        | 71.0        | 68.7        | 71.4    | 94.4    | 210.3   | 113.2    | 104.7    | 97.5     | 123.1    | 60.2          | 104.7      | 1.7         |  |
| 206380_s_at  | CFP         | 5.09E-03 | 98.4       | 59.7       | 108.0      | 160.3       | 202.9       | 247.8       | 147.7       | 157.1   | 95.9    | 159.9   | 174.4    | 516.6    | 302.1    | 336.0    | 147.7         | 174.4      | 1.2         |  |
| 206932_at    | CH25H       | 6.29E-06 | 102.5      | 44.0       | 54.6       | 63.6        | 47.7        | 66.7        | 78.4        | 695.8   | 1428.6  | 1120.0  | 1036.8   | 421.7    | 830.2    | 943.0    | 63.6          | 943.0      | 14.8        |  |
| 209395_at    | CHI3L1      | 2.48E-04 | 209.5      | 139.2      | 155.1      | 205.8       | 219.3       | 103.1       | 255.2       | 551.4   | 263.5   | 261.6   | 368.3    | 570.1    | 421.5    | 547.5    | 205.8         | 421.5      | 2.0         |  |
| 209396_s_at  | CHI3L1      | 3.83E-04 | 216.2      | 133.8      | 143.7      | 174.1       | 164.6       | 96.2        | 243.1       | 422.7   | 263.2   | 244.0   | 295.8    | 501.0    | 372.6    | 475.9    | 164.6         | 372.6      | 2.3         |  |
| 213060_s_at  | CHI3L2      | 1.17E-04 | 95.0       | 73.0       | 103.1      | 107.6       | 150.3       | 92.8        | 113.5       | 157.5   | 110.5   | 158.4   | 190.6    | 257.9    | 142.5    | 235.3    | 103.1         | 158.4      | 1.5         |  |
| 210069_at    | CHKB-CPT1B  | 8.21E-03 | 571.4      | 440.6      | 571.5      | 663.3       | 564.6       | 713.3       | 702.2       | 681.4   | 594.1   | 704.5   | 907.5    | 603.5    | 973.3    | 853.3    | 571.5         | 704.5      | 1.2         |  |
|              | /// CPT1B   |          |            |            |            |             |             |             |             |         |         |         |          |          |          |          |               |            |             |  |
| 225119_at    | CHMP4B      | 8.58E-03 | 1808.8     | 1391.6     | 1355.1     | 1615.1      | 1664.5      | 1303.3      | 1526.6      | 1899.2  | 1890.6  | 1966.6  | 1719.7   | 2626.3   | 2523.1   | 2393.9   | 1526.6        | 1966.6     | 1.3         |  |
| 225498_at    | CHMP4B      | 5.08E-03 | 481.4      | 432.3      | 462.8      | 512.9       | 602.5       | 511.7       | 491.4       | 618.3   | 474.2   | 639.7   | 623.1    | 745.6    | 695.0    | 696.8    | 491.4         | 639.7      | 1.3         |  |
| 219356_s_at  | CHMP5       | 8.63E-03 | 817.2      | 850.5      | 1159.7     | 1014.7      | 1006.4      | 1072.0      | 1128.0      | 1149.7  | 1297.3  | 1764.6  | 1336.7   | 1096.0   | 1166.8   | 1383.4   | 1014.7        | 1297.3     | 1.3         |  |
| 206703_at    | CHRN1       | 8.54E-03 | 40.5       | 31.0       | 75.1       | 54.4        | 51.3        | 50.5        | 67.1        | 55.8    | 47.9    | 98.7    | 51.2     | 73.5     | 71.0     | 88.0     | 51.3          | 71.0       | 1.4         |  |
| 219634_at    | CHST11      | 6.72E-03 | 623.7      | 252.3      | 415.1      | 544.4       | 518.9       | 264.2       | 553.6       | 762.0   | 471.8   | 595.3   | 644.7    | 691.7    | 646.7    | 736.9    | 518.9         | 646.7      | 1.2         |  |
| 203066_at    | CHST15      | 2.85E-04 | 31.1       | 67.5       | 30.5       | 22.1        | 23.3        | 19.5        | 24.9        | 74.5    | 132.9   | 225.6   | 90.3     | 241.0    | 118.6    | 258.2    | 24.9          | 132.9      | 5.3         |  |
| 203921_at    | CHST2       | 4.66E-04 | 73.2       | 73.0       | 49.7       | 56.5        | 70.1        | 50.4        | 56.9        | 109.7   | 114.6   | 113.4   | 112.1    | 145.1    | 88.2     | 196.2    | 56.9          | 113.4      | 2.0         |  |
| 200998_s_at  | CKAP4       | 1.35E-04 | 408.6      | 325.7      | 376.9      | 629.3       | 272.4       | 329.8       | 465.5       | 674.3   | 1419.1  | 1330.1  | 1171.5   | 1079.4   | 1223.7   | 1631.2   | 376.9         | 1223.7     | 3.2         |  |
| 200999_s_at  | CKAP4       | 1.78E-05 | 670.9      | 583.8      | 574.1      | 871.3       | 490.4       | 476.4       | 716.5       | 1483.0  | 2167.4  | 1945.3  | 1821.4   | 1740.6   | 1822.1   | 2274.3   | 583.8         | 1822.1     | 3.1         |  |
| 238048_at    | CLASP2      | 1.78E-03 | 77.2       | 68.1       | 102.3      | 117.8       | 108.0       | 102.1       | 100.8       | 112.5   | 88.1    | 151.9   | 148.3    | 140.7    | 124.6    | 137.6    | 102.1         | 137.6      | 1.3         |  |
| 220132_s_at  | CLEC2D      | 4.07E-05 | 65.8       | 37.5       | 39.0       | 63.1        | 42.2        | 30.0        | 40.7        | 198.4   | 198.0   | 545.6   | 284.9    | 220.4    | 239.6    | 483.2    | 40.7          | 239.6      | 5.9         |  |
| 233500_x_at  | CLEC2D      | 3.60E-05 | 50.3       | 32.3       | 32.4       | 56.6        | 34.2        | 43.1        | 38.3        | 155.2   | 157.2   | 414.9   | 221.2    | 191.3    | 200.2    | 342.3    | 38.3          | 200.2      | 5.2         |  |
| 1552772_at   | CLEC4D      | 4.62E-04 | 81.4       | 51.4       | 167.7      | 280.7       | 219.5       | 220.9       | 262.5       | 199.7   | 162.4   | 556.5   | 356.7    | 358.7    | 618.9    | 636.5    | 219.5         | 358.7      | 1.6         |  |
| 1552773_at   | CLEC4D      | 5.85E-04 | 108.1      | 53.0       | 158.6      | 251.3       | 266.9       | 190.7       | 285.3       | 212.9   | 207.3   | 469.4   | 381.3    | 398.8    | 502.8    | 609.5    | 190.7         | 398.8      | 2.1         |  |
| 219859_at    | CLEC4E      | 5.03E-03 | 34.2       | 26.9       | 26.5       | 34.9        | 46.5        | 26.9        | 37.8        | 40.8    | 59.4    | 81.1    | 65.4     | 46.1     | 61.9     | 67.7     | 34.2          | 61.9       | 1.8         |  |
| 222934_s_at  | CLEC4E      | 1.35E-04 | 627.1      | 252.8      | 365.4      | 653.8       | 936.1       | 477.1       | 661.8       | 1182.1  | 957.2   | 1445.3  | 1339.2   | 1809.8   | 1884.1   | 1828.1   | 627.1         | 1445.3     | 2.3         |  |
| 213415_at    | CLIC2       | 8.45E-03 | 114.5      | 116.4      | 173.4      | 184.2       | 221.5       | 175.4       | 153.2       | 219.9   | 211.5   | 493.5   | 273.3    | 251.9    | 191.5    | 213.7    | 173.4         | 219.9      | 1.3         |  |
| 201559_s_at  | CLIC4       | 6.42E-04 | 938.3      | 774.8      | 729.4      | 971.2       | 1090.0      | 854.2       | 978.3       | 1190.5  | 1295.7  | 1781.5  | 1553.3   | 1629.1   | 1471.5   | 1755.7   | 938.3         | 1553.3     | 1.7         |  |
| 201560_at    | CLIC4       | 6.82E-03 | 4530.0     | 4364.1     | 4560.6     | 5164.6      | 5665.4      | 4596.0      | 5443.3      | 5151.7  | 6256.5  | 7917.4  | 7004.1   | 6098.2   | 6318.6   | 7206.3   | 4596.0        | 6318.6     | 1.4         |  |
| 221881_s_at  | CLIC4       | 1.60E-04 | 1884.5     | 1588.4     | 1602.9     | 2019.0      | 2482.7      | 1591.4      | 2231.2      | 2931.6  | 3347.2  | 4345.6  | 3600.9   | 3941.8   | 4116.9   | 4511.8   | 1884.5        | 3941.8     | 2.1         |  |
| 201768_s_at  | CLINT1      | 2.66E-04 | 989.7      | 923.4      | 1022.0     | 1078.2      | 1077.5      | 1062.9      | 1039.9      | 1412.5  | 1334.3  | 2061.6  | 1640.0   | 1600.0   | 1898.7   | 1768.7   | 1039.9        | 1640.0     | 1.6         |  |
| 201769_at    | CLINT1      | 6.81E-03 | 1511.7     | 1509.1     | 2299.3     | 2324.2      | 2076.6      | 2379.9      | 2435.1      | 2022.6  | 2171.3  | 3869.0  | 3106.3   | 2149.4   | 2906.0   | 3170.7   | 2299.3        | 2906.0     | 1.3         |  |
| 1558924_s_at | CLIP1       | 4.45E-03 | 1206.3     | 1015.3     | 800.9      | 1015.8      | 1133.4      | 875.8       | 981.7       | 1436.8  | 1189.6  | 1153.8  | 1202.7   | 1545.7   | 1489.8   | 1417.9   | 1015.3        | 1417.9     | 1.4         |  |
| 207652_s_at  | CMKLR1      | 1.40E-03 | 84.3       | 52.9       | 65.7       | 48.1        | 64.7        | 49.1        | 49.8        | 91.6    | 80.6    | 216.3   | 114.9    | 129.4    | 128.7    | 110.3    | 52.9          | 114.9      | 2.2         |  |
| 210659_at    | CMKLR1      | 7.40E-04 | 95.9       | 69.9       | 88.0       | 56.0        | 97.1        | 40.2        | 56.5        | 126.7   | 149.5   | 425.4   | 216.8    | 213.1    | 232.7    | 176.5    | 69.9          | 213.1      | 3.0         |  |
| 229121_at    | CMKLR1      | 4.36E-03 | 107.4      | 112.5      | 87.2       | 63.4        | 133.0       | 39.8        | 86.6        | 117.5   | 175.6   | 357.7   | 170.1    | 213.9    | 198.5    | 183.3    | 87.2          | 183.3      | 2.1         |  |
| 226702_at    | CMPK2       | 4.93E-05 | 2540.2     | 2979.8     | 2566.9     | 2244.8      | 1943.2      | 1944.6      | 2431.6      | 4004.4  | 5926.6  | 7512.3  | 6488.1   | 5009.7   | 5250.0   | 7135.9   | 2431.6        | 5926.6     | 2.4         |  |
| 217947_at    | CMTM6       | 7.78E-03 | 2223.3     | 1912.5     | 2602.9     | 2667.9      | 2492.0      | 2388.3      | 2662.6      | 2703.6  | 2835.4  | 3839.3  | 3348.8   | 2863.3   | 2689.1   | 3332.8   | 2492.0        | 2863.3     | 1.1         |  |
| 227953_at    | CMTM6       | 3.14E-03 | 1238.5     | 1071.7     | 1215.3     | 1414.3      | 1228.2      | 1207.6      | 1239.5      | 1390.1  | 1514.2  | 1951.2  | 1792.8   | 1548.7   | 1615.0   | 1791.9   | 1228.2        | 1615.0     | 1.3         |  |
| 208912_s_at  | CNP         | 4.93E-05 | 1242.3     | 1260.6     | 1234.0     | 1161.2      | 1021.5      | 951.0       | 1142.3      | 1836.0  | 2280.0  | 2639.7  | 2089.3   | 2102.8   | 2041.6   | 2418.9   | 1161.2        | 2102.8     | 1.8         |  |
| 1559005_s_at | CNTLN       | 3.18E-03 | 63.1       | 50.6       | 88.3       | 58.2        | 101.6       | 105.9       | 86.2        | 95.5    | 82.5    | 243.8   | 116.0    | 118.8    | 148.8    | 122.4    | 86.2          | 118.8      | 1.4         |  |
| 219397_at    | COQ10B      | 2.75E-03 | 488.2      | 508.8      | 642.0      | 601.5       | 668.4       | 661.2       | 745.4       | 626.6   | 796.9   | 1077.2  | 901.2    | 763.5    | 826.1    | 1004.2   | 642.0         | 826.1      | 1.3         |  |
| 209083_at    | CORO1A      | 4.20E-03 | 200.5      | 153.5      | 134.8      | 267.6       | 161.0       | 122.7       | 137.9       | 241.6   | 195.2   | 256.2   | 393.2    | 530.6    | 360.4    | 494.4    | 153.5         | 360.4      | 2.3         |  |
| 201940_at    | CPD         | 1.78E-03 | 199.0      | 233.4      | 264.5      | 276.2       | 334.1       | 316.6       | 336.1       | 335.1   | 298.4   | 438.8   | 431.3    | 412.1    | 419.7    | 427.6    | 276.2         | 419.7      | 1.5         |  |
| 201942_s_at  | CPD         | 5.11E-03 | 485.9      | 592.9      | 575.8      | 672.9       | 773.9       | 706.7       | 706.1       | 715.8   | 637.4   | 807.7   | 873.6    | 969.8    | 873.9    | 1136.5   | 672.9         | 873.6      | 1.3         |  |
| 201943_s_at  | CPD         | 5.58E-03 | 126.6      | 149.6      | 186.7      | 190.4       | 216.6       | 199.5       | 251.6       | 186.6   | 205.2   | 398.9   | 270.1    | 224.9    | 267.5    | 366.1    | 190.4         | 267.5      | 1.4         |  |
| 229600_s_at  | CPD         | 7.39E-04 | 119.5      | 123.3      | 154.3      | 193.1       | 211.3       | 167.1       | 171.8       | 183.1   | 204.5   | 321.7   | 235.4    | 296.3    | 266.1    | 313.6    | 167.1         | 266.1      | 1.6         |  |
| 226939_at    | CPEB2       | 5.39E-03 | 457.4      | 450.0      | 595.3      | 532.2       | 607.3       | 635.1       | 634.2       | 564.5   | 952.9   | 1581.2  | 877.8    | 727.0    | 763.2    | 1101.6   | 595.3         | 877.8      | 1.5         |  |
| 235479_at    | CPEB2       | 2.59E-04 | 207.8      | 174.3      | 220.4      | 168.1       | 209.1       | 204.6       | 194.2       | 305.8   | 318.9   | 482.8   | 324.4    | 297.2    | 316.2    | 423.2    | 204.6         | 318.9      | 1.6         |  |
| 206100_at    | CPM         | 7.38E-06 | 295.3      | 314.1      | 390.8      | 336.7       | 434.7       | 432.2       | 446.9       | 851.4   | 725.7   | 1201.7  | 887.8    | 939.1    | 1127.6   | 1020.0   | 390.8         | 939.1      | 2.4         |  |
| 217557_s_at  | CPM         | 1.03E-05 | 812.7      | 727.7      | 748.7      | 617.4       | 754.3       | 738.7       | 812.1       | 1613.8  | 1414.7  | 1707.1  | 1496.1   | 1637.0   | 1960.1   | 1828.6   | 748.7         | 1637.0     | 2.2         |  |
| 235019_at    | CPM         | 6.17E-06 | 364.8      | 331.0      | 432.0      | 416.8       | 477.2       | 434.5       | 519.8       | 976.1   | 785.8   | 1248.9  | 1099.4   | 1075.6   | 1231.4   | 1156.0   | 432.0         | 1099.4     | 2.5         |  |
| 235706_at    | CPM         | 1.08E-05 | 126.4      | 109.4      | 159.6      | 135.2       | 202.8       | 152.4       | 189.9       | 366.2   | 234.7   | 483.5   | 347.4    | 464.0    | 497.6    | 425.2    | 152.4         | 425.2      | 2.8         |  |
| 241765_at    | CPM         | 6.17E-06 | 399.7      | 366.0      | 497.7      | 497.2       | 612.4       | 549.3       | 555.7       | 1138.9  | 1047.3  | 1526.6  | 1384.1   | 1254.2   | 1469.3   | 1381.1   | 497.7         | 1381.1     | 2.8         |  |
| 243403_x_at  | CPM         | 2.11E-05 | 46.1       | 50.1       | 63.0       | 51.6        | 69.0        | 73.4        | 80.3        | 114.2   | 112.0   | 178.0   | 145.5    | 127.9    | 148.6    | 167.4    | 63.0          | 145.5      | 2.3         |  |
| 243727_at    | CPNE8       | 2.99E-03 | 133.4      | 148.8      | 223.0      | 205.0       | 216.1       | 191.9       | 163.8       | 200.3   | 227.9   | 448.9   | 249.0    | 268.6    | 251.3    | 223.2    | 191.9         | 249.0      | 1.3         |  |
| 209432_s_at  | CREB3       | 2.99E-03 | 186.5      | 127.3      | 210.4      | 217.3       | 209.9       | 151.6       | 210.7       | 231.2   | 175.5   | 325.7   | 283.8    | 394.6    | 390.5    | 319.5    | 209.9         | 319.5      | 1.5         |  |
| 207630_s_at  | CREM        | 8.59E-05 | 147.2      | 143.6      | 174.5      | 167.3       | 255.3       |             |             |         |         |         |          |          |          |          |               |            |             |  |

TRANSCRIPTION PROFILES IN ALVEOLAR MACROPHAGES

Supplementary Table S1. Continued.

| ID           | Gene Symbol | p-value  | VW3_Saline | VW6_Saline | VW7_Saline | VW13_Saline | VW22_Saline | VW23_Saline | VW25_Saline | VW3_LPS | VW6_LPS | VW7_LPS | VW13_LPS | VW22_LPS | VW23_LPS | VW25_LPS | Median_saline | Median_LPS | Fold change |
|--------------|-------------|----------|------------|------------|------------|-------------|-------------|-------------|-------------|---------|---------|---------|----------|----------|----------|----------|---------------|------------|-------------|
| 203591_s_at  | CSF3R       | 8.12E-03 | 102.5      | 123.2      | 173.8      | 217.6       | 167.7       | 196.0       | 124.3       | 144.5   | 193.9   | 340.4   | 181.4    | 409.3    | 321.7    | 295.7    | 167.7         | 295.7      | 1.8         |
| 225557_at    | CSRNP1      | 3.50E-04 | 108.6      | 87.2       | 111.4      | 93.3        | 100.5       | 98.2        | 94.3        | 149.1   | 224.7   | 464.4   | 195.8    | 281.1    | 187.3    | 272.2    | 98.2          | 224.7      | 2.3         |
| 225042_s_at  | CSRNP2      | 6.03E-03 | 55.1       | 71.5       | 62.0       | 67.9        | 73.6        | 57.0        | 68.5        | 81.9    | 75.9    | 124.9   | 83.3     | 91.5     | 86.2     | 108.6    | 67.9          | 86.2       | 1.3         |
| 211126_s_at  | CSRP2       | 5.51E-03 | 48.8       | 49.4       | 49.4       | 50.0        | 50.2        | 44.0        | 42.1        | 59.0    | 57.4    | 126.7   | 90.3     | 71.0     | 59.6     | 93.5     | 49.4          | 71.0       | 1.4         |
| 210140_at    | CS17        | 4.85E-03 | 47.8       | 33.8       | 43.6       | 56.2        | 40.6        | 46.7        | 55.5        | 58.1    | 41.5    | 58.6    | 70.8     | 61.0     | 55.8     | 98.6     | 46.7          | 58.6       | 1.3         |
| 203947_at    | CS1F3       | 6.96E-04 | 271.4      | 265.5      | 317.3      | 308.4       | 312.5       | 361.5       | 360.1       | 402.6   | 390.5   | 553.3   | 461.7    | 431.2    | 459.6    | 485.8    | 312.5         | 459.6      | 1.5         |
| 236341_at    | CTLA4       | 9.76E-04 | 78.6       | 57.9       | 64.6       | 78.8        | 94.8        | 31.2        | 38.4        | 119.5   | 92.1    | 126.7   | 191.1    | 118.0    | 88.1     | 100.5    | 64.6          | 118.0      | 1.8         |
| 221021_s_at  | CTNBNB1     | 4.71E-03 | 938.2      | 804.8      | 844.8      | 765.3       | 888.4       | 776.7       | 643.0       | 1087.4  | 1095.5  | 1103.7  | 867.3    | 1249.1   | 1121.8   | 1138.7   | 804.8         | 1103.7     | 1.4         |
| 1555467_a_at | CUGBP1      | 3.85E-03 | 191.7      | 171.3      | 170.1      | 186.4       | 201.7       | 173.9       | 183.7       | 225.1   | 240.5   | 270.6   | 206.0    | 269.2    | 272.1    | 252.4    | 183.7         | 252.4      | 1.4         |
| 209489_at    | CUGBP1      | 5.14E-03 | 450.2      | 464.4      | 433.8      | 498.8       | 524.1       | 482.2       | 502.8       | 582.3   | 556.3   | 703.5   | 583.3    | 631.2    | 693.4    | 648.2    | 482.2         | 631.2      | 1.3         |
| 235297_at    | CUGBP1      | 8.78E-03 | 173.2      | 140.2      | 182.7      | 175.8       | 196.4       | 172.1       | 198.4       | 258.8   | 140.9   | 270.3   | 218.4    | 300.2    | 252.1    | 226.3    | 175.8         | 252.1      | 1.4         |
| 235865_at    | CUGBP1      | 5.10E-03 | 313.4      | 279.6      | 260.6      | 268.7       | 316.9       | 271.6       | 264.3       | 400.7   | 298.1   | 356.6   | 327.9    | 444.6    | 401.8    | 346.2    | 271.6         | 356.6      | 1.3         |
| 207614_s_at  | CUL1        | 2.61E-03 | 1682.2     | 1598.0     | 1650.0     | 1512.1      | 1728.4      | 1407.9      | 1573.7      | 1951.6  | 2076.5  | 2345.8  | 1862.9   | 2189.3   | 2112.6   | 2262.3   | 1598.0        | 2112.6     | 1.3         |
| 238509_at    | CUL1        | 9.56E-05 | 232.4      | 209.5      | 283.3      | 258.3       | 316.8       | 248.3       | 278.4       | 352.7   | 458.2   | 685.5   | 466.6    | 509.9    | 460.5    | 590.9    | 258.3         | 466.6      | 1.8         |
| 205898_at    | CX3CR1      | 2.09E-03 | 40.3       | 36.1       | 13.4       | 15.2        | 11.4        | 17.2        | 20.7        | 70.3    | 44.0    | 69.2    | 39.4     | 75.7     | 36.9     | 86.2     | 17.2          | 69.2       | 4.0         |
| 204470_at    | CXCL1       | 2.98E-05 | 202.1      | 84.1       | 310.1      | 274.0       | 694.1       | 100.1       | 576.8       | 1196.8  | 2553.3  | 6792.3  | 4895.7   | 3594.1   | 2979.6   | 5376.6   | 274.0         | 3594.1     | 13.1        |
| 204533_at    | CXCL10      | 2.10E-05 | 1950.1     | 1016.0     | 1643.9     | 841.0       | 2763.0      | 862.9       | 2621.9      | 9776.6  | 15548.4 | 17869.5 | 14410.8  | 12305.9  | 12472.3  | 15444.0  | 1643.9        | 14410.8    | 8.8         |
| 210163_at    | CXCL11      | 2.42E-06 | 18.2       | 84.3       | 147.8      | 27.4        | 144.7       | 30.9        | 79.3        | 300.5   | 3274.5  | 3440.3  | 1866.0   | 2271.2   | 1063.3   | 1898.4   | 79.3          | 1898.4     | 24.0        |
| 211122_s_at  | CXCL11      | 3.58E-06 | 81.4       | 42.8       | 91.1       | 32.6        | 103.3       | 21.2        | 85.0        | 1351.9  | 2600.0  | 3964.6  | 2276.1   | 1712.5   | 1211.0   | 2235.0   | 81.4          | 2235.0     | 27.4        |
| 1569203_at   | CXCL2       | 1.24E-03 | 23.2       | 26.3       | 33.1       | 24.7        | 51.1        | 31.5        | 39.7        | 46.8    | 40.7    | 128.6   | 74.9     | 90.6     | 51.5     | 61.1     | 31.5          | 61.1       | 1.9         |
| 209774_x_at  | CXCL2       | 1.17E-03 | 312.7      | 196.8      | 493.9      | 386.2       | 941.4       | 234.9       | 673.9       | 570.3   | 1167.0  | 2446.5  | 1272.3   | 1209.9   | 1292.7   | 1584.1   | 386.2         | 1272.3     | 3.3         |
| 230101_at    | CXCL2       | 2.48E-04 | 75.7       | 35.0       | 93.8       | 88.7        | 126.7       | 55.1        | 108.4       | 143.7   | 123.0   | 296.9   | 201.0    | 299.7    | 192.3    | 154.0    | 88.7          | 192.3      | 2.2         |
| 207850_at    | CXCL3       | 5.18E-04 | 267.7      | 147.3      | 317.8      | 227.8       | 556.2       | 171.7       | 526.0       | 458.1   | 892.9   | 1634.6  | 970.8    | 1000.5   | 1145.4   | 1372.0   | 267.7         | 1000.5     | 3.7         |
| 207852_at    | CXCL5       | 1.19E-03 | 44.3       | 9.6        | 16.2       | 28.7        | 64.2        | 10.1        | 52.1        | 75.8    | 71.4    | 182.4   | 147.0    | 114.5    | 118.0    | 160.1    | 28.7          | 118.0      | 4.1         |
| 214974_x_at  | CXCL5       | 6.78E-03 | 1087.6     | 86.4       | 518.2      | 689.2       | 1409.9      | 266.8       | 1754.9      | 1431.9  | 1997.3  | 3688.5  | 2721.7   | 2078.3   | 2120.5   | 3360.9   | 689.2         | 2120.5     | 3.1         |
| 215101_s_at  | CXCL5       | 1.33E-03 | 1487.9     | 64.5       | 302.3      | 474.7       | 1038.8      | 165.6       | 1021.2      | 2302.4  | 2103.1  | 3745.6  | 3012.9   | 3759.6   | 3417.5   | 3787.8   | 474.7         | 3417.5     | 7.2         |
| 206974_at    | CXCR6       | 1.69E-03 | 75.0       | 72.5       | 73.0       | 85.5        | 95.1        | 99.6        | 87.2        | 129.0   | 97.8    | 102.0   | 149.2    | 118.3    | 121.5    | 129.7    | 85.5          | 121.5      | 1.4         |
| 230532_at    | CXorf38     | 5.19E-03 | 299.5      | 381.8      | 514.1      | 493.4       | 496.6       | 564.6       | 462.3       | 582.6   | 581.6   | 748.5   | 601.0    | 616.0    | 614.4    | 794.5    | 493.4         | 614.4      | 1.2         |
| 228809_at    | CXorf40A    | 8.68E-03 | 89.5       | 73.4       | 77.9       | 86.7        | 96.9        | 91.1        | 99.4        | 103.2   | 90.9    | 109.5   | 97.7     | 130.4    | 112.9    | 118.6    | 89.5          | 109.5      | 1.2         |
| 220230_s_at  | CYB5R2      | 7.99E-05 | 213.3      | 161.7      | 346.4      | 133.8       | 105.8       | 124.8       | 365.0       | 423.5   | 269.2   | 635.3   | 247.6    | 154.0    | 240.5    | 573.2    | 161.7         | 269.2      | 1.7         |
| 201885_s_at  | CYB5R3      | 7.99E-03 | 929.2      | 905.1      | 786.3      | 986.6       | 1040.2      | 836.9       | 972.8       | 1173.4  | 1019.7  | 1221.9  | 1126.4   | 1223.7   | 1143.8   | 1336.3   | 929.2         | 1173.4     | 1.3         |
| 221903_s_at  | CYLD        | 6.65E-05 | 343.0      | 313.7      | 392.3      | 338.9       | 452.5       | 295.4       | 384.4       | 530.3   | 704.2   | 921.0   | 628.3    | 783.5    | 744.9    | 851.4    | 343.0         | 744.9      | 2.2         |
| 222142_at    | CYLD        | 6.91E-04 | 46.8       | 53.7       | 87.3       | 79.0        | 107.6       | 63.6        | 84.4        | 95.2    | 76.3    | 186.9   | 131.1    | 129.1    | 128.7    | 141.3    | 79.0          | 129.1      | 1.6         |
| 60084_at     | CYLD        | 2.97E-03 | 92.8       | 106.8      | 113.1      | 104.3       | 157.9       | 104.6       | 127.7       | 146.0   | 163.9   | 319.0   | 179.7    | 168.5    | 198.1    | 197.5    | 106.8         | 179.7      | 1.7         |
| 202436_s_at  | CYP11B1     | 4.62E-03 | 62.5       | 53.7       | 68.7       | 68.8        | 42.8        | 28.6        | 40.7        | 85.0    | 63.9    | 116.0   | 123.5    | 134.1    | 67.8     | 197.1    | 53.7          | 116.0      | 2.2         |
| 219565_at    | CYP20A1     | 3.66E-03 | 293.7      | 274.4      | 296.9      | 339.5       | 364.6       | 334.4       | 388.6       | 385.2   | 414.5   | 653.4   | 436.9    | 421.7    | 491.5    | 600.0    | 334.4         | 436.9      | 1.3         |
| 205676_at    | CYP27B1     | 1.16E-05 | 4.9        | 11.6       | 26.1       | 23.2        | 17.8        | 10.2        | 29.0        | 65.5    | 73.5    | 226.8   | 95.3     | 86.9     | 48.9     | 147.4    | 17.8          | 86.9       | 4.9         |
| 205999_x_at  | CYP3A4      | 3.16E-04 | 32.5       | 19.6       | 37.2       | 36.1        | 60.1        | 37.2        | 60.4        | 64.2    | 91.6    | 291.3   | 119.0    | 147.5    | 96.4     | 143.8    | 37.2          | 119.0      | 3.2         |
| 208367_x_at  | CYP3A4      | 1.40E-03 | 42.0       | 39.6       | 39.0       | 30.7        | 40.6        | 28.4        | 41.4        | 51.3    | 76.3    | 125.8   | 68.3     | 73.3     | 64.6     | 57.0     | 39.6          | 68.3       | 1.7         |
| 211441_x_at  | CYP3A43     | 7.04E-03 | 47.6       | 47.6       | 54.5       | 28.9        | 47.6        | 45.3        | 60.2        | 49.3    | 71.7    | 66.2    | 64.8     | 61.4     | 75.3     | 101.2    | 47.6          | 66.2       | 1.4         |
| 211442_x_at  | CYP3A43     | 3.95E-03 | 49.1       | 53.6       | 49.7       | 39.1        | 52.7        | 40.9        | 62.2        | 45.3    | 121.6   | 114.7   | 92.9     | 76.6     | 108.0    | 95.6     | 49.7          | 95.6       | 1.9         |
| 205765_at    | CYP3A5      | 1.03E-04 | 88.2       | 70.5       | 154.3      | 127.1       | 239.8       | 159.7       | 279.4       | 187.8   | 400.6   | 1158.1  | 464.4    | 636.1    | 863.3    | 818.6    | 154.3         | 636.1      | 4.1         |
| 214234_s_at  | CYP3A5      | 7.66E-04 | 115.8      | 133.9      | 157.2      | 137.2       | 255.3       | 155.6       | 295.4       | 143.6   | 477.5   | 1244.7  | 485.8    | 618.4    | 780.2    | 901.7    | 155.6         | 618.4      | 4.0         |
| 214235_at    | CYP3A5      | 9.97E-05 | 40.6       | 39.7       | 74.5       | 57.8        | 111.8       | 58.3        | 117.0       | 82.3    | 141.2   | 478.0   | 231.3    | 247.0    | 225.4    | 324.9    | 58.3          | 231.3      | 4.0         |
| 205939_at    | CYP3A7      | 2.54E-04 | 95.1       | 64.6       | 78.4       | 85.5        | 209.6       | 40.3        | 184.3       | 240.0   | 366.7   | 1240.3  | 605.6    | 606.1    | 476.5    | 660.7    | 85.5          | 605.6      | 7.1         |
| 211843_x_at  | CYP3A7      | 2.20E-04 | 95.7       | 73.9       | 96.2       | 119.5       | 236.7       | 39.6        | 193.7       | 331.5   | 437.8   | 1277.3  | 627.1    | 614.8    | 695.7    | 781.8    | 96.2          | 627.1      | 6.5         |
| 243609_at    | CYP3A7      | 4.66E-03 | 61.0       | 42.4       | 58.9       | 37.7        | 78.5        | 40.4        | 71.7        | 83.2    | 76.4    | 318.1   | 171.2    | 109.8    | 144.2    | 110.2    | 58.9          | 110.2      | 1.9         |
| 216607_s_at  | CYP51A1     | 2.07E-03 | 612.3      | 490.4      | 277.6      | 291.9       | 504.0       | 392.1       | 602.1       | 744.4   | 688.0   | 468.7   | 438.4    | 598.9    | 597.1    | 789.7    | 490.4         | 598.9      | 1.2         |
| 237234_at    | CYTH2       | 5.98E-03 | 146.2      | 101.4      | 140.7      | 126.7       | 118.4       | 116.8       | 115.0       | 195.4   | 151.0   | 144.7   | 153.9    | 167.1    | 171.6    | 148.1    | 118.4         | 153.9      | 1.3         |
| 1560633_a_at | D21S2089E   | 6.92E-03 | 54.7       | 55.1       | 61.0       | 67.0        | 49.4        | 48.0        | 50.5        | 58.1    | 80.8    | 80.3    | 75.0     | 67.1     | 81.8     | 75.6     | 54.7          | 75.6       | 1.4         |
| 222858_s_at  | DAPP1       | 1.09E-03 | 840.3      | 946.2      | 879.1      | 879.7       | 1116.3      | 1022.9      | 960.1       | 1393.5  | 1284.3  | 1128.8  | 1435.8   | 1479.3   | 1347.0   | 1338.6   | 946.2         | 1347.0     | 1.4         |
| 1553768_a_at | DCBLD1      | 6.07E-03 | 145.8      | 126.1      | 88.1       | 132.0       | 130.1       | 92.4        | 111.7       | 170.2   | 186.5   | 260.1   | 167.0    | 178.0    | 153.9    | 198.9    | 126.1         | 178.0      | 1.4         |
| 226609_at    | DCBLD1      | 2.44E-03 | 83.7       | 71.6       | 68.1       | 93.8        | 86.5        | 62.8        | 74.9        | 109.4   | 149.5   | 230.0   | 131.8    | 115.6    | 136.7    | 143.5    | 74.9          | 136.7      | 1.8         |
| 218508_at    | DCP1A       | 1.08E-04 | 449.6      | 373.5      | 399.1      | 375.7       | 478.2       | 497.3       | 526.5       | 687.1   | 692.1   | 947.0   | 686.6    | 859.3    | 760.5    | 963.1    | 449.6         | 760.5      | 1.7         |
| 225443_at    | DCP1A       | 4.56E-04 | 476.1      | 456.8      | 513.8      | 520.7       | 667.9       | 617.5       | 645.7       | 722.7   | 919.1   | 1335.3  | 841.4    | 923.1    | 1004.3   | 1225.2   | 520.7         | 923.1      | 1.8         |
| 204296_at    | DCTN1       | 2.24E-03 | 102.1      | 51.2       | 82.1       | 90.9        | 112.4       | 50.3        | 142.5       | 129.4   | 139.6   | 220.3   | 168.9    | 158.6    | 154.0    | 198.2    | 90.9          | 158.6      | 1.7         |
| 209231_s_at  | DCTN5       | 1.59E-03 | 227.4      | 220.6      | 263.9      | 265.6       | 288.7       | 197.5       | 212.2       | 311.6   | 277.8   | 423.9   | 338.5    | 430.3    | 264.7    | 269.1    | 227.4         | 311.6      | 1.4         |
| 239648_at    | DCUN1D3     | 3.24E-03 | 297.1      | 156.7      | 350.6      | 325.5       | 577.7       | 275.2       | 555.4       | 389.7   | 504.0   | 1215.0  | 576.5    | 674.6    | 717.3    | 950.2    | 325.5         | 674.6      | 2.1         |
| 218260_at    | DDA1        | 9.74E-03 | 115.1      | 98.4       | 118.5      | 123.3       | 121.9       | 130.9       | 134.6       | 168.4   | 103.7   | 172.6   | 139.9    | 183.4    | 207.9    | 152.9    | 121.9         | 168.4      |             |



Supplementary Table S1. Continued.

| ID           | Gene Symbol        | p-value  | VW3_Saline | VW6_Saline | VW7_Saline | VW13_Saline | VW22_Saline | VW23_Saline | VW25_Saline | VW3_LPS | VW6_LPS | VW7_LPS | VW13_LPS | VW22_LPS | VW23_LPS | VW25_LPS | Median_saline | Median_LPS | Fold change |
|--------------|--------------------|----------|------------|------------|------------|-------------|-------------|-------------|-------------|---------|---------|---------|----------|----------|----------|----------|---------------|------------|-------------|
| 218943_s_at  | DDX58              | 4.47E-06 | 680.9      | 687.8      | 605.3      | 590.8       | 582.5       | 492.5       | 612.5       | 2057.2  | 3238.5  | 3825.2  | 2720.0   | 2830.8   | 2824.9   | 3812.8   | 605.3         | 2830.8     | 4.7         |
| 222793_at    | DDX58              | 6.17E-06 | 373.0      | 343.9      | 248.3      | 266.2       | 310.7       | 266.6       | 338.9       | 1129.2  | 1465.2  | 1835.7  | 1544.0   | 1378.2   | 1429.9   | 2115.7   | 310.7         | 1465.2     | 4.7         |
| 242961_x_at  | DDX58              | 2.73E-05 | 112.2      | 562.9      | 844.6      | 701.5       | 530.7       | 616.6       | 425.8       | 223.5   | 2559.0  | 4361.3  | 3321.2   | 1726.1   | 2004.3   | 2173.6   | 562.9         | 2173.6     | 3.9         |
| 228385_at    | DDX59              | 9.57E-03 | 369.8      | 303.1      | 351.1      | 442.3       | 440.3       | 388.6       | 352.8       | 417.8   | 423.1   | 671.3   | 586.7    | 453.9    | 627.3    | 482.2    | 369.8         | 482.2      | 1.3         |
| 228386_s_at  | DDX59              | 1.57E-03 | 170.7      | 180.6      | 264.6      | 273.8       | 268.4       | 281.4       | 255.4       | 316.9   | 278.5   | 485.5   | 403.6    | 312.0    | 389.6    | 341.4    | 264.6         | 341.4      | 1.3         |
| 218986_s_at  | DDX60              | 6.91E-05 | 577.7      | 853.5      | 1007.2     | 865.8       | 870.1       | 911.2       | 815.3       | 1093.2  | 1644.1  | 2884.1  | 1894.7   | 1420.3   | 1673.1   | 1955.2   | 865.8         | 1673.1     | 1.9         |
| 1559585_at   | DDX60L             | 5.99E-04 | 147.2      | 186.4      | 252.2      | 131.6       | 175.6       | 217.6       | 193.2       | 239.5   | 411.2   | 939.5   | 335.0    | 325.7    | 301.4    | 411.5    | 186.4         | 335.0      | 1.8         |
| 228152_s_at  | DDX60L             | 1.09E-04 | 1082.5     | 1706.9     | 1346.2     | 783.2       | 1211.7      | 1504.6      | 1303.7      | 1869.0  | 3249.1  | 4228.8  | 2129.1   | 2438.1   | 2624.4   | 2706.6   | 1303.7        | 2624.4     | 2.0         |
| 219763_at    | DENND1A            | 1.39E-04 | 118.6      | 105.4      | 103.7      | 144.2       | 150.0       | 112.6       | 141.8       | 163.0   | 239.2   | 326.6   | 222.3    | 236.6    | 216.9    | 376.2    | 118.6         | 236.6      | 2.0         |
| 219696_at    | DENND1B            | 6.73E-03 | 45.0       | 55.5       | 85.3       | 74.2        | 80.8        | 84.8        | 81.4        | 93.0    | 87.0    | 143.7   | 127.7    | 90.4     | 88.6     | 108.8    | 80.8          | 93.0       | 1.2         |
| 212974_at    | DENND3             | 2.59E-04 | 48.4       | 47.0       | 62.2       | 62.2        | 71.7        | 47.8        | 71.8        | 76.7    | 66.9    | 81.9    | 102.6    | 131.1    | 89.3     | 128.7    | 62.2          | 89.3       | 1.4         |
| 212975_at    | DENND3             | 4.38E-04 | 163.5      | 140.1      | 189.0      | 205.5       | 211.7       | 160.3       | 251.5       | 265.9   | 234.0   | 269.5   | 326.2    | 307.3    | 388.9    | 426.3    | 189.0         | 307.3      | 1.6         |
| 212561_at    | DENND5A            | 1.39E-03 | 2967.6     | 2760.0     | 2654.4     | 2767.5      | 3404.6      | 2997.9      | 3117.5      | 3767.7  | 4094.4  | 5010.6  | 3858.3   | 4132.5   | 4560.8   | 5014.8   | 2967.6        | 4132.5     | 1.4         |
| 218333_at    | DERL2              | 4.16E-03 | 1327.8     | 1234.6     | 1087.7     | 1119.7      | 1185.3      | 1014.7      | 1076.5      | 1555.2  | 1384.4  | 1505.0  | 1490.4   | 1576.3   | 1600.6   | 1470.1   | 1119.7        | 1505.0     | 1.3         |
| 1553300_a_at | DGKH               | 3.42E-04 | 34.7       | 33.2       | 59.2       | 41.5        | 74.8        | 47.2        | 69.7        | 90.3    | 90.8    | 237.0   | 90.1     | 103.6    | 119.6    | 124.5    | 47.2          | 103.6      | 2.2         |
| 225503_at    | DHRX               | 2.93E-03 | 252.2      | 252.0      | 291.4      | 277.5       | 263.9       | 242.5       | 262.7       | 328.0   | 278.6   | 368.8   | 383.7    | 380.8    | 361.8    | 355.1    | 262.7         | 361.8      | 1.4         |
| 201385_at    | DHX15              | 3.94E-03 | 735.2      | 786.9      | 934.6      | 1002.4      | 975.9       | 915.6       | 1239.5      | 1035.2  | 1252.8  | 1637.9  | 1294.3   | 1080.9   | 1196.0   | 1576.6   | 934.6         | 1252.8     | 1.3         |
| 201386_s_at  | DHX15              | 4.78E-03 | 1358.6     | 1094.6     | 1121.9     | 1205.9      | 1118.9      | 984.7       | 1226.8      | 1444.8  | 1521.0  | 1614.1  | 1403.1   | 1528.6   | 1526.0   | 1721.2   | 1121.9        | 1526.0     | 1.4         |
| 219364_at    | DHX58              | 2.14E-05 | 140.1      | 113.0      | 129.9      | 125.2       | 142.9       | 110.1       | 129.6       | 236.3   | 244.1   | 369.6   | 284.3    | 357.9    | 290.6    | 339.8    | 129.6         | 290.6      | 2.2         |
| 216260_at    | DICER1             | 6.88E-03 | 61.5       | 59.4       | 42.5       | 34.4        | 59.4        | 49.2        | 51.6        | 66.9    | 74.0    | 147.0   | 97.4     | 77.2     | 94.3     | 118.4    | 51.6          | 94.3       | 1.8         |
| 216280_s_at  | DICER1             | 3.30E-03 | 126.6      | 102.2      | 116.2      | 129.6       | 120.0       | 126.4       | 156.1       | 166.0   | 125.3   | 177.6   | 154.2    | 165.0    | 166.2    | 191.6    | 126.4         | 166.0      | 1.3         |
| 231412_at    | DKFZp686L14188     | 9.31E-05 | 29.9       | 33.2       | 34.4       | 26.5        | 43.4        | 31.5        | 44.6        | 67.1    | 67.9    | 145.6   | 80.9     | 76.8     | 77.4     | 111.5    | 33.2          | 77.4       | 2.3         |
| 229715_at    | DKFZp686O24166     | 2.51E-04 | 107.4      | 90.2       | 104.1      | 136.6       | 179.8       | 74.3        | 167.6       | 236.6   | 170.2   | 403.1   | 237.2    | 331.4    | 237.9    | 341.0    | 107.4         | 237.9      | 2.2         |
| 209095_at    | DLD                | 5.18E-04 | 2123.6     | 2886.9     | 2617.8     | 2488.2      | 2632.1      | 2548.4      | 2594.3      | 2906.8  | 3992.0  | 4597.4  | 4146.1   | 3700.7   | 3850.5   | 3509.8   | 2594.3        | 3850.5     | 1.5         |
| 1563229_at   | DLEU2              | 6.36E-03 | 38.4       | 28.8       | 54.1       | 54.3        | 58.3        | 47.0        | 46.9        | 56.6    | 45.4    | 88.0    | 76.1     | 54.8     | 66.3     | 62.0     | 47.0          | 62.0       | 1.3         |
| 224215_s_at  | DLL1               | 2.19E-03 | 93.8       | 117.1      | 73.0       | 64.0        | 93.3        | 67.1        | 70.8        | 126.9   | 224.8   | 129.2   | 72.5     | 157.4    | 94.2     | 169.1    | 73.0          | 129.2      | 1.8         |
| 215761_at    | DMXL2              | 2.30E-03 | 42.1       | 40.0       | 86.4       | 62.1        | 79.2        | 70.5        | 90.5        | 88.2    | 73.2    | 259.1   | 179.5    | 99.2     | 107.6    | 119.7    | 70.5          | 107.6      | 1.5         |
| 215266_at    | DNAH3              | 6.32E-03 | 41.4       | 45.8       | 42.6       | 39.1        | 38.4        | 43.2        | 46.3        | 45.5    | 59.0    | 57.2    | 62.9     | 49.1     | 69.4     | 53.7     | 42.6          | 57.2       | 1.3         |
| 1554334_a_at | DNAJA4             | 8.84E-03 | 398.6      | 378.6      | 393.2      | 303.2       | 324.8       | 276.1       | 333.7       | 381.6   | 735.7   | 816.9   | 382.1    | 422.9    | 415.4    | 506.3    | 333.7         | 422.9      | 1.3         |
| 212817_at    | DNAJB5             | 7.64E-03 | 58.0       | 46.2       | 58.0       | 53.8        | 59.3        | 47.1        | 53.2        | 82.3    | 66.0    | 74.7    | 52.5     | 76.6     | 65.0     | 91.1     | 53.8          | 74.7       | 1.4         |
| 208811_s_at  | DNAJB6 /// TMEM135 | 5.55E-03 | 1751.5     | 1877.0     | 1828.6     | 1738.0      | 1820.7      | 1902.7      | 1970.8      | 2104.4  | 2378.4  | 2922.9  | 2162.5   | 2153.7   | 2385.7   | 2544.8   | 1828.6        | 2378.4     | 1.3         |
| 1554462_a_at | DNAJB9             | 1.99E-03 | 130.4      | 229.0      | 283.9      | 271.2       | 288.9       | 261.3       | 296.4       | 294.8   | 343.7   | 754.3   | 535.5    | 360.1    | 379.6    | 410.2    | 271.2         | 379.6      | 1.4         |
| 202842_s_at  | DNAJB9             | 9.49E-03 | 1114.6     | 1250.4     | 1371.0     | 1321.6      | 1348.9      | 1275.7      | 1522.7      | 1259.2  | 2061.2  | 2836.8  | 2509.2   | 1504.7   | 1568.9   | 1949.3   | 1321.6        | 1949.3     | 1.5         |
| 202843_at    | DNAJB9             | 4.91E-03 | 111.1      | 169.7      | 182.6      | 150.1       | 180.8       | 171.6       | 251.1       | 201.7   | 289.2   | 472.4   | 430.6    | 210.1    | 250.7    | 295.2    | 171.6         | 289.2      | 1.7         |
| 222620_s_at  | DNAJC1             | 8.67E-03 | 571.3      | 539.0      | 612.1      | 600.3       | 640.6       | 587.6       | 548.6       | 748.4   | 776.7   | 904.1   | 785.4    | 640.7    | 691.4    | 903.1    | 587.6         | 776.7      | 1.3         |
| 222621_at    | DNAJC1             | 3.88E-03 | 214.4      | 227.9      | 240.8      | 235.8       | 278.5       | 249.6       | 234.8       | 364.4   | 281.5   | 389.8   | 331.3    | 321.5    | 290.8    | 375.2    | 235.8         | 331.3      | 1.4         |
| 238336_s_at  | DNAJC2             | 5.32E-03 | 381.6      | 411.6      | 425.3      | 370.7       | 448.4       | 434.1       | 411.3       | 441.0   | 532.4   | 704.8   | 529.2    | 571.1    | 499.7    | 542.6    | 411.6         | 532.4      | 1.3         |
| 1558080_s_at | DNAJC3             | 2.36E-03 | 420.5      | 520.6      | 458.6      | 545.1       | 520.7       | 491.9       | 618.3       | 692.5   | 648.5   | 1243.5  | 815.7    | 753.6    | 733.2    | 949.0    | 520.6         | 753.6      | 1.4         |
| 208499_s_at  | DNAJC3             | 1.34E-03 | 2135.6     | 1830.1     | 1649.2     | 1954.0      | 1966.3      | 1636.6      | 2195.8      | 2583.7  | 2743.2  | 3564.9  | 2753.5   | 2698.7   | 2829.9   | 3699.4   | 1954.0        | 2753.5     | 1.4         |
| 225284_at    | DNAJC3             | 9.53E-03 | 2346.7     | 2711.2     | 2577.2     | 2610.6      | 2643.8      | 2524.8      | 3017.8      | 2690.9  | 3321.8  | 4484.4  | 3774.6   | 2968.8   | 3129.5   | 3899.0   | 2610.6        | 3321.8     | 1.3         |
| 235341_at    | DNAJC3             | 2.15E-04 | 561.2      | 571.8      | 625.7      | 655.2       | 640.6       | 520.7       | 787.9       | 872.0   | 889.7   | 1446.1  | 1100.3   | 1067.5   | 831.5    | 1208.2   | 625.7         | 1067.5     | 1.7         |
| 224612_s_at  | DNAJC5             | 9.54E-03 | 481.2      | 353.1      | 465.9      | 457.3       | 457.9       | 366.8       | 497.4       | 515.6   | 432.3   | 603.7   | 545.5    | 574.0    | 570.9    | 637.8    | 457.9         | 570.9      | 1.2         |
| 224613_s_at  | DNAJC5             | 3.52E-03 | 158.7      | 106.9      | 159.2      | 158.8       | 142.8       | 132.3       | 180.9       | 207.5   | 177.0   | 272.3   | 183.8    | 180.2    | 195.0    | 221.8    | 158.7         | 195.0      | 1.2         |
| 1556053_at   | DNAJC7             | 3.53E-03 | 104.5      | 109.3      | 188.2      | 177.3       | 170.2       | 150.0       | 214.1       | 145.3   | 179.4   | 302.3   | 232.8    | 245.8    | 201.4    | 222.9    | 170.2         | 222.9      | 1.3         |
| 202416_at    | DNAJC7             | 3.59E-03 | 1056.2     | 1004.7     | 1027.6     | 1017.7      | 1110.8      | 930.3       | 1195.2      | 1358.7  | 1278.8  | 1505.7  | 1182.8   | 1392.8   | 1544.4   | 1564.8   | 1027.6        | 1392.8     | 1.4         |
| 38703_at     | DNPEP              | 3.01E-03 | 1060.5     | 924.4      | 980.3      | 1051.7      | 941.0       | 871.5       | 919.8       | 1248.3  | 1218.7  | 1551.3  | 1199.2   | 1350.8   | 1210.5   | 1400.3   | 941.0         | 1248.3     | 1.3         |
| 1558691_a_at | DOCK4              | 1.38E-04 | 20.2       | 32.0       | 31.0       | 24.4        | 42.2        | 12.4        | 33.8        | 51.1    | 78.2    | 116.4   | 104.4    | 110.7    | 70.2     | 61.1     | 31.0          | 78.2       | 2.5         |
| 205003_at    | DOCK4              | 4.03E-04 | 358.3      | 180.8      | 223.2      | 337.8       | 453.6       | 226.9       | 370.7       | 599.2   | 729.8   | 1315.3  | 1001.8   | 762.6    | 631.3    | 1195.6   | 337.8         | 762.6      | 2.3         |
| 244840_x_at  | DOCK4              | 5.94E-03 | 93.9       | 58.4       | 50.0       | 59.1        | 78.9        | 54.9        | 61.0        | 88.0    | 78.2    | 106.5   | 128.4    | 114.7    | 106.3    | 91.9     | 59.1          | 106.3      | 1.8         |
| 225384_at    | DOCK7              | 6.70E-03 | 302.7      | 281.2      | 393.4      | 358.2       | 401.1       | 416.8       | 462.1       | 445.8   | 417.2   | 521.2   | 478.3    | 453.4    | 462.2    | 565.4    | 393.4         | 462.2      | 1.2         |
| 231297_at    | DOT1L              | 9.12E-05 | 55.2       | 51.5       | 53.7       | 62.9        | 69.5        | 49.1        | 68.2        | 91.4    | 80.0    | 131.8   | 132.7    | 124.8    | 93.9     | 117.8    | 55.2          | 117.8      | 2.1         |
| 218627_at    | DRAM1              | 6.53E-04 | 3683.6     | 2477.3     | 2289.2     | 1566.6      | 3983.5      | 1811.4      | 4023.0      | 5381.0  | 5774.4  | 7110.7  | 3655.9   | 5804.9   | 5746.2   | 6832.5   | 2477.3        | 5774.4     | 2.3         |
| 218854_at    | DSE                | 3.51E-03 | 2831.3     | 2797.3     | 2610.9     | 3231.7      | 4170.5      | 2531.4      | 4422.1      | 3922.6  | 4542.3  | 5485.5  | 5115.1   | 4461.8   | 4583.8   | 5549.0   | 2831.3        | 4583.8     | 1.6         |
| 208430_s_at  | DTNA               | 4.27E-05 | 107.3      | 157.5      | 131.7      | 89.6        | 128.3       | 121.6       | 110.2       | 199.1   | 353.0   | 439.5   | 205.1    | 259.4    | 247.9    | 226.2    | 121.6         | 247.9      | 2.0         |
| 210091_s_at  | DTNA               | 2.90E-04 | 31.6       | 36.0       | 66.0       | 30.2        | 48.1        | 66.6        | 45.0        | 63.7    | 133.1   | 253.3   | 121.5    | 105.3    | 98.6     | 110.7    | 45.0          | 110.7      | 2.5         |
| 210611_s_at  | DTNA               | 6.72E-04 | 33.7       | 39.5       | 51.9       | 20.1        | 32.3        | 54.7        | 41.9        | 59.0    | 123.3   | 231.8   | 103.1    | 86.0     | 83.0     | 88.2     | 39.5          | 88.2       | 2.2         |
| 210736_x_at  | DTNA               | 9.18E-05 | 123.1      | 175.7      | 139.9      | 111.6       | 146.9       | 135.3       | 126.7       | 202.9   | 433.8   | 500.9   | 222.1    | 299.1    | 296.0    | 296.3    | 135.3         | 296.3      | 2.2         |
| 211493_x_at  | DTNA               | 2.47E-04 | 90.3       | 148.0      | 122.4      | 95.7        | 138.3       | 136.2       | 115.9       | 206.2   | 353.4   | 546.5   | 192.1    | 249.5    | 259.3    | 238.8    | 122.4         | 249.5      | 2.0         |
| 22           |                    |          |            |            |            |             |             |             |             |         |         |         |          |          |          |          |               |            |             |

TRANSCRIPTION PROFILES IN ALVEOLAR MACROPHAGES

Supplementary Table S1. Continued.

| ID           | Gene Symbol | p-value  | VW3_Saline | VW6_Saline | VW7_Saline | VW13_Saline | VW22_Saline | VW23_Saline | VW25_Saline | VW3_LPS | VW6_LPS | VW7_LPS | VW13_LPS | VW22_LPS | VW23_LPS | VW25_LPS | Median_saline | Median_LPS | Fold change |
|--------------|-------------|----------|------------|------------|------------|-------------|-------------|-------------|-------------|---------|---------|---------|----------|----------|----------|----------|---------------|------------|-------------|
| 224336_s_at  | DUSP16      | 3.32E-04 | 59.6       | 87.5       | 64.6       | 54.7        | 104.0       | 51.4        | 90.2        | 102.6   | 120.4   | 186.3   | 119.9    | 181.6    | 111.7    | 154.5    | 64.6          | 120.4      | 1.9         |
| 224832_at    | DUSP16      | 2.63E-03 | 165.9      | 193.9      | 125.1      | 120.4       | 265.2       | 96.8        | 161.5       | 194.5   | 271.2   | 351.5   | 213.0    | 372.5    | 209.1    | 273.2    | 161.5         | 271.2      | 1.7         |
| 204794_at    | DUSP2       | 6.50E-05 | 43.4       | 35.8       | 58.6       | 41.5        | 51.7        | 37.5        | 39.2        | 79.3    | 72.5    | 170.2   | 112.8    | 217.9    | 110.1    | 149.2    | 41.5          | 112.8      | 2.7         |
| 209457_at    | DUSP5       | 4.69E-05 | 113.6      | 102.6      | 163.1      | 123.2       | 173.8       | 113.6       | 144.2       | 250.9   | 515.6   | 932.4   | 406.4    | 451.4    | 310.2    | 584.0    | 123.2         | 451.4      | 3.7         |
| 208892_s_at  | DUSP6       | 7.59E-03 | 625.2      | 560.8      | 553.3      | 895.5       | 1022.0      | 900.4       | 1214.9      | 725.6   | 960.6   | 1193.5  | 1337.7   | 1357.8   | 1015.8   | 1548.3   | 895.5         | 1193.5     | 1.3         |
| 208893_s_at  | DUSP6       | 1.07E-03 | 632.9      | 520.0      | 372.1      | 595.1       | 847.4       | 611.9       | 837.6       | 730.6   | 846.8   | 819.2   | 1136.4   | 1245.8   | 964.1    | 1321.8   | 611.9         | 964.1      | 1.6         |
| 206374_at    | DUSP8       | 8.18E-03 | 153.7      | 156.1      | 115.8      | 126.2       | 174.3       | 125.4       | 151.8       | 144.1   | 185.3   | 318.8   | 220.7    | 278.5    | 376.5    | 334.9    | 151.8         | 278.5      | 1.8         |
| 203590_at    | DYNC1LI2    | 1.53E-03 | 234.9      | 189.4      | 184.5      | 180.8       | 212.8       | 189.6       | 186.0       | 290.3   | 259.8   | 301.7   | 249.3    | 270.4    | 258.7    | 250.7    | 189.4         | 259.8      | 1.4         |
| 201999_s_at  | DYNLT1      | 6.48E-05 | 1213.0     | 1257.5     | 1135.1     | 1042.3      | 1111.6      | 932.1       | 1116.1      | 1910.5  | 2629.7  | 3523.3  | 2066.3   | 2533.0   | 2379.2   | 3003.7   | 1116.1        | 2533.0     | 2.3         |
| 218660_at    | DYSF        | 5.29E-03 | 80.2       | 70.2       | 61.8       | 64.4        | 61.0        | 62.8        | 57.7        | 84.1    | 91.4    | 143.9   | 81.8     | 138.8    | 101.7    | 115.7    | 62.8          | 101.7      | 1.6         |
| 203692_s_at  | E2F3        | 8.78E-04 | 212.9      | 168.1      | 279.3      | 291.2       | 318.2       | 245.3       | 313.8       | 313.0   | 258.4   | 482.3   | 382.7    | 428.5    | 431.5    | 400.2    | 279.3         | 400.2      | 1.4         |
| 219424_at    | EBI3        | 1.76E-05 | 61.6       | 45.4       | 62.7       | 61.2        | 76.0        | 59.2        | 56.6        | 133.1   | 99.2    | 237.3   | 179.6    | 216.6    | 176.6    | 219.7    | 61.2          | 179.6      | 2.9         |
| 201750_s_at  | ECE1        | 4.56E-03 | 50.3       | 39.5       | 65.3       | 72.2        | 67.6        | 58.7        | 61.6        | 66.7    | 51.4    | 86.9    | 74.6     | 121.2    | 101.3    | 102.4    | 61.6          | 86.9       | 1.4         |
| 203279_at    | EDEM1       | 1.41E-03 | 587.1      | 435.8      | 535.8      | 565.6       | 699.3       | 664.3       | 734.0       | 769.0   | 795.6   | 1124.3  | 911.5    | 895.2    | 893.0    | 1087.9   | 587.1         | 895.2      | 1.5         |
| 1564630_at   | EDN1        | 1.17E-04 | 68.9       | 46.8       | 42.5       | 36.0        | 50.4        | 35.1        | 41.9        | 132.5   | 367.8   | 691.9   | 222.4    | 251.3    | 223.3    | 432.4    | 42.5          | 251.3      | 5.9         |
| 218995_s_at  | EDN1        | 2.19E-05 | 64.6       | 51.2       | 56.7       | 58.2        | 61.8        | 51.9        | 70.2        | 219.3   | 748.2   | 1312.3  | 529.7    | 559.1    | 389.9    | 896.5    | 58.2          | 559.1      | 9.6         |
| 222802_at    | EDN1        | 1.24E-05 | 20.6       | 20.8       | 19.6       | 20.6        | 27.8        | 20.3        | 37.2        | 116.7   | 334.4   | 802.2   | 250.0    | 245.5    | 224.2    | 511.2    | 20.6          | 200.0      | 12.1        |
| 222483_at    | EFHD2       | 7.45E-03 | 1225.0     | 1080.5     | 999.0      | 1278.2      | 1258.4      | 902.7       | 1090.1      | 1242.1  | 1467.0  | 1660.0  | 1499.8   | 1720.0   | 1785.2   | 1796.4   | 1090.1        | 1660.0     | 1.5         |
| 201693_s_at  | EGR1        | 5.30E-03 | 63.0       | 45.5       | 69.9       | 49.2        | 74.9        | 65.1        | 75.7        | 79.0    | 75.3    | 163.1   | 84.8     | 95.1     | 72.7     | 109.8    | 65.1          | 84.8       | 1.3         |
| 206115_at    | EGR3        | 5.76E-05 | 25.3       | 29.8       | 21.3       | 23.3        | 38.8        | 29.8        | 29.8        | 74.6    | 154.2   | 356.2   | 133.0    | 191.8    | 156.4    | 327.9    | 29.8          | 156.4      | 5.3         |
| 212650_at    | EHBP1       | 2.09E-03 | 314.8      | 321.5      | 345.8      | 394.0       | 375.4       | 367.1       | 310.0       | 483.3   | 600.2   | 666.2   | 449.7    | 506.5    | 494.5    | 647.1    | 345.8         | 506.5      | 1.5         |
| 212653_s_at  | EHBP1       | 1.58E-03 | 129.4      | 178.8      | 230.1      | 198.5       | 214.3       | 228.0       | 219.1       | 262.8   | 322.1   | 460.7   | 303.1    | 261.9    | 274.4    | 344.2    | 214.3         | 303.1      | 1.4         |
| 1557749_at   | EHBP1L1     | 7.87E-03 | 128.5      | 109.8      | 239.3      | 196.6       | 192.9       | 170.0       | 192.8       | 207.2   | 165.7   | 328.0   | 260.8    | 220.6    | 188.0    | 225.7    | 192.8         | 220.6      | 1.1         |
| 91703_at     | EHBP1L1     | 8.88E-03 | 162.6      | 124.9      | 169.5      | 168.2       | 164.0       | 154.2       | 165.0       | 249.0   | 133.5   | 209.3   | 205.6    | 268.5    | 254.3    | 190.5    | 164.0         | 209.3      | 1.3         |
| 208112_x_at  | EHD1        | 7.06E-04 | 267.7      | 104.4      | 204.2      | 274.0       | 358.3       | 183.2       | 450.4       | 434.3   | 598.4   | 740.9   | 490.7    | 833.5    | 857.7    | 1005.2   | 267.7         | 740.9      | 2.8         |
| 209037_s_at  | EHD1        | 4.11E-05 | 128.8      | 91.4       | 87.2       | 101.8       | 205.9       | 107.1       | 219.4       | 346.7   | 463.1   | 859.3   | 436.7    | 657.1    | 730.6    | 870.9    | 107.1         | 657.1      | 6.1         |
| 209038_s_at  | EHD1        | 4.66E-04 | 93.7       | 58.2       | 78.9       | 92.5        | 118.5       | 80.6        | 136.0       | 143.6   | 112.3   | 207.5   | 155.8    | 337.8    | 334.9    | 281.8    | 92.5          | 207.5      | 2.2         |
| 209039_x_at  | EHD1        | 1.28E-04 | 365.7      | 164.4      | 273.5      | 366.3       | 567.4       | 322.9       | 724.7       | 811.2   | 847.3   | 1141.7  | 742.8    | 1381.8   | 1409.1   | 1735.1   | 365.7         | 1141.7     | 3.1         |
| 222221_x_at  | EHD1        | 1.67E-04 | 211.5      | 122.9      | 161.7      | 224.8       | 294.9       | 163.0       | 352.8       | 389.0   | 448.2   | 594.8   | 403.3    | 702.5    | 695.2    | 823.0    | 211.5         | 594.8      | 2.8         |
| 209536_s_at  | EHD4        | 7.07E-03 | 1793.5     | 1888.5     | 1588.3     | 1654.7      | 1639.2      | 1536.6      | 1483.8      | 1904.7  | 2154.2  | 2155.9  | 2230.0   | 2086.6   | 2130.8   | 2184.3   | 1639.2        | 2154.2     | 1.3         |
| 233660_at    | EHD4        | 9.87E-04 | 405.2      | 483.4      | 471.9      | 536.0       | 492.6       | 406.2       | 484.5       | 576.5   | 705.1   | 734.3   | 676.2    | 644.2    | 540.2    | 654.8    | 483.4         | 654.8      | 1.4         |
| 212225_at    | EIF1        | 2.72E-03 | 157.7      | 130.7      | 226.0      | 167.7       | 182.8       | 169.3       | 187.7       | 212.9   | 230.5   | 448.8   | 253.1    | 223.0    | 200.3    | 273.3    | 167.7         | 230.5      | 1.4         |
| 204211_x_at  | EIF2AK2     | 8.89E-05 | 825.2      | 1262.7     | 1204.4     | 1007.6      | 1062.3      | 1102.3      | 1237.6      | 1357.5  | 2035.7  | 2403.9  | 2250.0   | 1676.1   | 1814.3   | 2398.9   | 1102.3        | 2035.7     | 1.8         |
| 225827_at    | EIF2C2      | 3.64E-05 | 143.4      | 113.6      | 183.0      | 185.6       | 227.1       | 145.4       | 207.7       | 357.5   | 241.6   | 543.0   | 341.1    | 393.0    | 328.2    | 476.6    | 183.0         | 357.5      | 2.0         |
| 225940_at    | EIF4E3      | 7.57E-06 | 60.7       | 52.7       | 104.6      | 123.4       | 113.0       | 84.3        | 75.4        | 133.9   | 145.4   | 245.4   | 241.7    | 267.6    | 203.9    | 197.6    | 84.3          | 203.9      | 2.4         |
| 225941_at    | EIF4E3      | 4.19E-04 | 31.4       | 37.2       | 55.3       | 55.3        | 58.6        | 41.6        | 30.8        | 50.9    | 56.2    | 108.7   | 122.8    | 76.5     | 83.0     | 75.7     | 41.6          | 76.5       | 1.8         |
| 238461_at    | EIF4E3      | 1.22E-04 | 103.4      | 147.2      | 173.3      | 190.3       | 174.0       | 121.3       | 112.3       | 150.5   | 303.3   | 485.2   | 391.2    | 427.4    | 321.7    | 378.6    | 147.2         | 378.6      | 2.6         |
| 208624_s_at  | EIF4G1      | 5.99E-03 | 738.4      | 592.5      | 605.3      | 680.2       | 686.6       | 608.0       | 694.4       | 794.2   | 740.5   | 814.9   | 815.7    | 923.9    | 961.0    | 944.4    | 680.2         | 815.7      | 1.2         |
| 201122_x_at  | EIF5A       | 5.92E-03 | 662.9      | 513.8      | 600.6      | 653.1       | 573.6       | 539.0       | 652.3       | 687.7   | 679.5   | 846.9   | 774.1    | 813.5    | 809.8    | 873.5    | 600.6         | 809.8      | 1.3         |
| 201123_s_at  | EIF5A       | 1.55E-03 | 293.3      | 231.8      | 266.3      | 328.3       | 278.9       | 273.3       | 317.8       | 391.2   | 288.2   | 490.8   | 430.4    | 494.1    | 543.9    | 456.1    | 278.9         | 456.1      | 1.6         |
| 213753_x_at  | EIF5A       | 9.78E-03 | 669.0      | 578.4      | 588.0      | 696.0       | 592.0       | 509.2       | 634.1       | 760.2   | 651.6   | 804.6   | 768.1    | 770.5    | 704.2    | 916.4    | 592.0         | 768.1      | 1.3         |
| 203490_at    | ELF4        | 7.69E-04 | 564.4      | 573.4      | 541.3      | 535.1       | 583.2       | 533.4       | 558.7       | 800.2   | 680.7   | 791.6   | 750.0    | 869.3    | 855.2    | 913.9    | 558.7         | 800.2      | 1.4         |
| 31845_at     | ELF4        | 1.20E-03 | 776.8      | 866.7      | 770.2      | 789.3       | 882.1       | 768.8       | 823.7       | 1100.1  | 1038.7  | 1427.9  | 1101.7   | 1190.5   | 1174.9   | 1284.2   | 789.3         | 1174.9     | 1.5         |
| 1565254_s_at | ELL         | 1.83E-03 | 58.2       | 84.8       | 91.8       | 97.5        | 78.8        | 79.5        | 108.5       | 86.8    | 88.4    | 138.3   | 170.6    | 174.7    | 142.9    | 186.5    | 84.8          | 142.9      | 1.7         |
| 220363_s_at  | ELMO2       | 3.55E-03 | 264.2      | 191.3      | 260.3      | 288.2       | 265.3       | 267.3       | 274.7       | 321.4   | 240.0   | 316.6   | 361.2    | 469.9    | 389.7    | 422.1    | 265.3         | 361.2      | 1.4         |
| 221528_s_at  | ELMO2       | 4.24E-04 | 684.4      | 625.8      | 690.5      | 714.2       | 738.4       | 726.6       | 762.5       | 964.1   | 1019.2  | 1049.6  | 1023.5   | 991.6    | 969.6    | 1175.3   | 714.2         | 1019.2     | 1.4         |
| 55692_at     | ELMO2       | 1.41E-03 | 324.8      | 353.8      | 426.3      | 417.0       | 443.3       | 485.2       | 490.1       | 613.1   | 473.7   | 661.1   | 707.8    | 619.4    | 582.4    | 674.7    | 426.3         | 619.4      | 1.5         |
| 215082_at    | ELOVL5      | 5.57E-03 | 61.0       | 53.0       | 64.6       | 65.2        | 73.6        | 74.3        | 68.7        | 88.2    | 63.6    | 103.3   | 72.8     | 101.6    | 86.1     | 111.3    | 65.2          | 88.2       | 1.4         |
| 227180_at    | ELOVL7      | 1.54E-04 | 45.9       | 36.2       | 60.4       | 68.9        | 280.5       | 101.4       | 161.2       | 305.4   | 559.2   | 1110.5  | 462.8    | 626.7    | 555.1    | 748.3    | 68.9          | 559.2      | 8.1         |
| 226789_at    | EMB         | 1.15E-03 | 96.4       | 88.8       | 45.8       | 73.2        | 68.5        | 61.8        | 61.9        | 129.6   | 108.7   | 100.4   | 149.2    | 140.3    | 92.1     | 148.0    | 68.5          | 129.6      | 1.9         |
| 234464_s_at  | EME1        | 3.77E-03 | 613.9      | 674.3      | 654.7      | 737.0       | 757.5       | 679.9       | 779.4       | 844.6   | 843.2   | 1081.7  | 939.3    | 983.3    | 870.9    | 913.3    | 679.9         | 913.3      | 1.3         |
| 224374_s_at  | EMILIN2     | 5.98E-03 | 3186.7     | 2441.0     | 2800.7     | 3748.7      | 2936.8      | 2542.4      | 2835.5      | 3361.8  | 2931.6  | 4712.6  | 5029.5   | 3873.3   | 4405.2   | 3933.3   | 2835.5        | 3933.3     | 1.4         |
| 242288_s_at  | EMILIN2     | 2.63E-03 | 1402.5     | 1076.9     | 1075.0     | 1694.0      | 1141.8      | 1069.7      | 1507.8      | 1622.3  | 1511.3  | 2070.5  | 2062.6   | 1820.0   | 2188.5   | 2334.4   | 1141.8        | 2062.6     | 1.8         |
| 201324_at    | EMP1        | 1.42E-04 | 441.7      | 225.3      | 253.1      | 262.4       | 303.5       | 74.4        | 357.5       | 747.6   | 1767.9  | 1863.3  | 1486.9   | 1393.7   | 966.0    | 1869.8   | 262.4         | 1486.9     | 5.7         |
| 201325_s_at  | EMP1        | 2.95E-04 | 322.5      | 139.8      | 110.0      | 168.0       | 162.4       | 62.0        | 168.7       | 390.8   | 657.7   | 523.1   | 501.3    | 608.9    | 351.9    | 736.8    | 162.4         | 523.1      | 3.2         |
| 213895_at    | EMP1        | 1.55E-03 | 51.8       | 45.1       | 34.6       | 44.2        | 45.1        | 28.2        | 38.2        | 59.0    | 80.3    | 91.3    | 64.1     | 73.1     | 54.0     | 92.7     | 44.2          | 73.1       | 1.7         |
| 203729_at    | EMP3        | 2.33E-03 | 566.5      | 305.6      | 404.7      | 505.2       | 451.2       | 341.9       | 518.7       | 699.8   | 603.6   | 861.4   | 635.7    | 1313.0   | 1218.8   | 979.3    | 451.2         | 861.4      | 1.9         |
| 207111_at    | EMR1        | 4.79E-04 | 2222.1     | 995.9      | 1058.2     | 716.1       | 2884.8      | 1689.1      | 2664.2      | 4476.3  | 2230.6  | 2683.0  | 2463.0   | 4204.7   | 3854.8   | 3824.3   | 1689.1        | 3824.3     | 2.3         |
| 207610_s_at  | EMR2        | 7.57E-06 | 271.3      | 103.6      | 129.0      | 173.0       | 192.6       | 138.0       | 364.6</     |         |         |         |          |          |          |          |               |            |             |

Supplementary Table S1. Continued.

| ID           | Gene Symbol | p-value  | VW3_Saline | VW6_Saline | VW7_Saline | VW13_Saline | VW22_Saline | VW23_Saline | VW25_Saline | VW3_LPS | VW6_LPS | VW7_LPS | VW13_LPS | VW22_LPS | VW23_LPS | VW25_LPS | Median_saline | Median_LPS | Fold change |
|--------------|-------------|----------|------------|------------|------------|-------------|-------------|-------------|-------------|---------|---------|---------|----------|----------|----------|----------|---------------|------------|-------------|
| 212681_at    | EPB41L3     | 2.58E-03 | 159.3      | 165.6      | 241.2      | 233.6       | 265.9       | 234.1       | 253.3       | 264.7   | 258.8   | 405.4   | 368.0    | 283.8    | 307.5    | 332.7    | 234.1         | 307.5      | 1.3         |
| 220977_x_at  | EPB41L5     | 8.85E-03 | 82.5       | 126.9      | 100.1      | 83.3        | 129.1       | 110.0       | 79.6        | 129.1   | 142.0   | 198.1   | 149.9    | 125.4    | 149.4    | 155.0    | 100.1         | 149.4      | 1.5         |
| 229292_at    | EPB41L5     | 2.86E-04 | 34.4       | 39.9       | 68.7       | 42.2        | 73.0        | 46.9        | 66.9        | 78.9    | 98.3    | 290.4   | 74.9     | 122.3    | 131.2    | 125.2    | 46.9          | 122.3      | 2.6         |
| 202609_at    | EPS8        | 4.58E-04 | 181.8      | 142.2      | 199.3      | 201.1       | 195.7       | 166.1       | 198.4       | 338.6   | 322.0   | 371.9   | 307.0    | 281.5    | 223.7    | 317.7    | 195.7         | 317.7      | 1.6         |
| 227609_at    | EPST11      | 7.13E-05 | 1265.4     | 1217.9     | 996.8      | 943.9       | 928.9       | 513.4       | 872.0       | 2010.1  | 3589.4  | 4107.0  | 3216.9   | 2585.4   | 2269.6   | 3712.9   | 943.9         | 3216.9     | 3.4         |
| 235276_at    | EPST11      | 4.66E-04 | 323.6      | 261.8      | 232.7      | 256.9       | 251.6       | 182.9       | 189.0       | 457.7   | 423.5   | 643.1   | 573.2    | 590.1    | 537.8    | 769.6    | 251.6         | 573.2      | 2.3         |
| 209701_at    | ERAP1       | 4.78E-03 | 1012.0     | 862.9      | 873.2      | 948.1       | 977.7       | 1007.3      | 814.9       | 1316.9  | 1137.4  | 1154.2  | 1217.6   | 1093.9   | 1206.6   | 1071.4   | 948.1         | 1154.2     | 1.2         |
| 1569583_at   | EREG        | 7.68E-03 | 54.2       | 61.9       | 51.3       | 44.1        | 55.1        | 41.3        | 49.0        | 54.2    | 81.1    | 86.1    | 56.2     | 86.1     | 51.2     | 86.1     | 51.3          | 81.1       | 1.6         |
| 205767_at    | EREG        | 1.14E-03 | 41.5       | 28.7       | 14.7       | 24.4        | 51.2        | 12.3        | 46.8        | 55.6    | 120.6   | 407.5   | 136.0    | 209.8    | 106.4    | 274.2    | 28.7          | 136.0      | 4.7         |
| 207061_at    | ERN1        | 3.14E-03 | 72.1       | 69.9       | 71.2       | 84.2        | 77.7        | 81.7        | 82.1        | 86.4    | 99.5    | 123.4   | 106.5    | 122.2    | 103.5    | 102.2    | 77.7          | 103.5      | 1.3         |
| 235745_at    | ERN1        | 1.67E-03 | 51.9       | 64.0       | 52.2       | 57.8        | 61.7        | 47.3        | 56.6        | 69.3    | 88.1    | 110.0   | 96.3     | 76.0     | 68.3     | 85.8     | 56.6          | 85.8       | 1.5         |
| 220012_at    | ERO1LB      | 4.91E-03 | 46.4       | 73.1       | 75.5       | 56.6        | 81.6        | 64.1        | 88.9        | 74.5    | 82.3    | 126.5   | 116.9    | 96.3     | 86.8     | 118.9    | 73.1          | 96.3       | 1.3         |
| 201573_s_at  | ETF1        | 8.11E-03 | 641.9      | 711.0      | 704.8      | 694.9       | 787.1       | 675.2       | 861.4       | 756.8   | 948.7   | 1179.5  | 890.3    | 853.9    | 928.5    | 1059.9   | 704.8         | 928.5      | 1.3         |
| 224453_s_at  | ETNK1       | 3.02E-03 | 60.5       | 62.0       | 84.1       | 74.7        | 84.2        | 78.1        | 74.9        | 96.9    | 95.8    | 133.7   | 98.1     | 93.7     | 99.5     | 96.5     | 74.9          | 96.9       | 1.3         |
| 1555355_a_at | ETS1        | 2.04E-03 | 37.2       | 35.2       | 26.2       | 36.2        | 41.8        | 26.7        | 41.4        | 51.0    | 47.9    | 76.0    | 127.9    | 59.0     | 57.8     | 92.7     | 36.2          | 59.0       | 1.6         |
| 201328_at    | ETS2        | 2.63E-04 | 251.9      | 192.5      | 310.0      | 268.0       | 254.9       | 287.5       | 344.7       | 358.3   | 292.5   | 641.6   | 392.3    | 391.3    | 471.8    | 614.6    | 268.0         | 392.3      | 1.5         |
| 201329_s_at  | ETS2        | 1.24E-04 | 200.0      | 136.5      | 230.5      | 197.4       | 233.3       | 212.1       | 301.7       | 295.2   | 286.6   | 650.8   | 340.8    | 481.3    | 541.8    | 609.4    | 212.1         | 481.3      | 2.3         |
| 241193_at    | ETS2        | 1.05E-04 | 286.9      | 275.0      | 379.7      | 207.3       | 252.0       | 201.6       | 318.3       | 399.3   | 633.3   | 1282.9  | 537.1    | 648.4    | 461.6    | 896.8    | 275.0         | 633.3      | 2.3         |
| 1552423_at   | ETV3        | 3.42E-03 | 45.2       | 52.3       | 63.3       | 66.3        | 70.3        | 63.3        | 50.9        | 83.7    | 67.2    | 109.3   | 93.7     | 114.6    | 64.0     | 84.4     | 63.3          | 84.4       | 1.3         |
| 203348_s_at  | ETV5        | 1.03E-04 | 36.3       | 44.0       | 38.4       | 44.6        | 51.7        | 26.2        | 67.0        | 116.4   | 98.9    | 189.9   | 137.9    | 101.9    | 124.4    | 153.3    | 44.0          | 124.4      | 2.8         |
| 203349_s_at  | ETV5        | 2.84E-05 | 204.2      | 105.3      | 103.1      | 122.3       | 152.1       | 78.6        | 254.3       | 530.7   | 663.3   | 877.3   | 694.8    | 558.0    | 578.5    | 917.9    | 122.3         | 663.3      | 5.4         |
| 216375_s_at  | ETV5        | 4.08E-05 | 74.5       | 62.4       | 62.8       | 68.2        | 67.3        | 55.4        | 73.4        | 141.2   | 119.2   | 149.7   | 105.9    | 127.5    | 119.6    | 138.2    | 67.3          | 127.5      | 1.9         |
| 230102_at    | ETV5        | 1.40E-04 | 228.8      | 58.5       | 104.7      | 168.6       | 237.2       | 86.2        | 381.9       | 695.2   | 874.1   | 1100.6  | 917.8    | 799.1    | 930.3    | 1291.1   | 168.6         | 917.8      | 5.4         |
| 205585_at    | ETV6        | 1.52E-04 | 210.2      | 165.2      | 250.6      | 263.1       | 257.0       | 197.0       | 262.7       | 343.2   | 263.2   | 379.1   | 358.4    | 408.5    | 316.6    | 392.9    | 250.6         | 358.4      | 1.4         |
| 221680_s_at  | ETV7        | 1.73E-04 | 39.1       | 31.2       | 42.3       | 33.9        | 22.4        | 45.5        | 32.5        | 75.5    | 82.3    | 355.1   | 94.8     | 131.6    | 211.2    | 152.4    | 33.9          | 131.6      | 3.9         |
| 210011_s_at  | EWSR1       | 3.01E-03 | 467.2      | 311.5      | 423.3      | 438.0       | 401.6       | 339.8       | 419.7       | 506.3   | 451.0   | 609.6   | 563.3    | 629.2    | 630.4    | 580.8    | 419.7         | 580.8      | 1.4         |
| 205061_s_at  | EXOSC9      | 3.60E-03 | 1031.0     | 1191.1     | 1422.6     | 1466.6      | 1226.4      | 1340.2      | 1359.7      | 1378.4  | 2251.7  | 3089.5  | 2236.2   | 1240.5   | 1970.1   | 2481.6   | 1340.2        | 2236.2     | 1.7         |
| 201995_at    | EXT1        | 6.71E-06 | 289.9      | 188.4      | 221.1      | 226.0       | 245.6       | 213.5       | 275.6       | 1053.6  | 1866.3  | 2114.9  | 1076.5   | 1786.9   | 1790.0   | 1744.8   | 226.0         | 1786.9     | 7.9         |
| 230183_at    | EXT1        | 2.81E-03 | 42.7       | 33.7       | 24.7       | 35.2        | 36.1        | 26.3        | 34.5        | 54.8    | 42.6    | 80.9    | 54.5     | 59.9     | 58.1     | 69.4     | 34.5          | 58.1       | 1.7         |
| 203358_s_at  | EZH2        | 5.38E-04 | 105.7      | 124.1      | 182.9      | 164.3       | 165.7       | 109.2       | 137.4       | 175.8   | 175.6   | 310.1   | 286.4    | 200.8    | 161.8    | 211.2    | 137.4         | 200.8      | 1.5         |
| 208621_s_at  | EZR         | 6.51E-03 | 399.7      | 268.2      | 287.2      | 385.5       | 379.8       | 317.2       | 358.7       | 416.4   | 414.8   | 436.8   | 432.8    | 493.8    | 502.6    | 516.5    | 358.7         | 436.8      | 1.2         |
| 208622_s_at  | EZR         | 2.60E-03 | 351.1      | 281.3      | 263.0      | 342.4       | 353.3       | 273.1       | 359.7       | 421.6   | 407.8   | 389.7   | 393.7    | 514.5    | 467.0    | 480.2    | 342.4         | 421.6      | 1.2         |
| 204363_at    | F3          | 4.66E-04 | 146.1      | 132.5      | 184.3      | 198.4       | 239.4       | 126.2       | 273.9       | 253.0   | 387.1   | 863.0   | 455.5    | 377.4    | 278.6    | 589.8    | 184.3         | 387.1      | 2.1         |
| 220643_s_at  | FAM1        | 7.83E-03 | 400.3      | 249.5      | 299.5      | 335.1       | 318.3       | 236.2       | 468.5       | 457.7   | 404.4   | 808.5   | 522.8    | 387.0    | 380.8    | 584.8    | 318.3         | 457.7      | 1.4         |
| 224783_at    | FAM100B     | 4.19E-03 | 455.5      | 380.4      | 396.3      | 385.2       | 394.1       | 360.3       | 508.8       | 558.7   | 498.7   | 709.2   | 472.2    | 655.4    | 841.2    | 684.7    | 394.1         | 655.4      | 1.7         |
| 226905_at    | FAM101B     | 8.10E-03 | 111.6      | 91.8       | 153.6      | 140.3       | 110.8       | 108.6       | 86.8        | 123.2   | 159.0   | 343.3   | 158.5    | 284.5    | 209.3    | 422.3    | 110.8         | 209.3      | 1.9         |
| 228382_at    | FAM105B     | 4.53E-03 | 136.5      | 128.9      | 162.1      | 148.4       | 163.0       | 171.2       | 161.4       | 182.4   | 141.8   | 221.5   | 194.4    | 191.5    | 232.4    | 231.1    | 161.4         | 194.4      | 1.2         |
| 229196_at    | FAM111A     | 6.63E-03 | 43.3       | 49.7       | 70.5       | 66.2        | 80.0        | 65.1        | 59.6        | 64.9    | 67.0    | 104.2   | 84.5     | 91.2     | 74.5     | 70.6     | 65.1          | 74.5       | 1.1         |
| 213861_s_at  | FAM119B     | 7.83E-03 | 210.5      | 241.7      | 376.3      | 259.9       | 333.9       | 170.9       | 388.6       | 272.5   | 379.5   | 674.4   | 329.2    | 385.6    | 250.9    | 414.3    | 259.9         | 379.5      | 1.5         |
| 1552323_s_at | FAM122C     | 1.66E-03 | 50.4       | 60.7       | 57.1       | 45.6        | 53.2        | 45.6        | 40.0        | 60.2    | 86.8    | 99.1    | 73.5     | 69.1     | 62.8     | 53.2     | 50.4          | 69.1       | 1.4         |
| 230067_at    | FAM124A     | 5.50E-03 | 35.4       | 38.9       | 32.3       | 38.9        | 31.8        | 31.3        | 34.7        | 45.9    | 39.1    | 158.7   | 109.0    | 78.9     | 67.8     | 67.5     | 34.7          | 67.8       | 2.0         |
| 230519_at    | FAM124A     | 6.73E-03 | 60.3       | 64.5       | 67.4       | 62.5        | 69.4        | 61.5        | 70.6        | 62.0    | 75.5    | 223.3   | 174.5    | 122.2    | 132.0    | 114.7    | 64.5          | 122.2      | 1.9         |
| 221687_s_at  | FAM125B     | 1.07E-03 | 262.7      | 273.1      | 235.8      | 227.1       | 347.1       | 289.5       | 187.9       | 371.0   | 337.7   | 527.3   | 340.2    | 432.4    | 329.6    | 262.7    | 371.0         | 340.2      | 1.4         |
| 221828_s_at  | FAM125B     | 4.30E-03 | 66.7       | 65.9       | 92.9       | 91.7        | 113.0       | 83.3        | 98.2        | 113.4   | 75.8    | 156.7   | 122.0    | 153.3    | 149.6    | 110.7    | 91.7          | 122.0      | 1.3         |
| 52975_at     | FAM125B     | 1.00E-03 | 169.5      | 192.4      | 188.2      | 213.8       | 240.1       | 198.3       | 116.7       | 269.0   | 249.7   | 376.6   | 292.8    | 358.4    | 286.6    | 248.4    | 192.4         | 286.6      | 1.5         |
| 217966_s_at  | FAM129A     | 4.04E-04 | 5096.2     | 5251.4     | 4588.2     | 5843.1      | 6223.1      | 5225.4      | 6560.2      | 7214.2  | 9305.5  | 10059.6 | 9372.3   | 8205.4   | 8657.4   | 11435.2  | 5251.4        | 9305.5     | 1.8         |
| 217967_s_at  | FAM129A     | 2.61E-04 | 1911.6     | 1740.6     | 1933.3     | 2601.6      | 2410.4      | 1884.2      | 2144.7      | 3153.2  | 3355.3  | 5046.0  | 4084.0   | 3466.6   | 3310.3   | 4117.9   | 1933.3        | 3466.6     | 1.8         |
| 233971_at    | FAM166A     | 3.09E-03 | 175.9      | 109.6      | 193.4      | 211.2       | 148.7       | 180.0       | 245.9       | 233.2   | 181.1   | 323.7   | 247.8    | 317.5    | 430.3    | 316.0    | 180.0         | 316.0      | 1.8         |
| 1554509_a_at | FAM188A     | 4.28E-03 | 254.4      | 271.9      | 358.9      | 361.0       | 456.9       | 350.9       | 385.4       | 446.0   | 398.1   | 726.2   | 575.4    | 486.1    | 496.6    | 464.1    | 358.9         | 486.1      | 1.4         |
| 1554132_a_at | FAM190B     | 1.36E-03 | 116.7      | 115.9      | 151.9      | 137.3       | 154.2       | 138.8       | 171.8       | 161.9   | 202.8   | 350.6   | 226.7    | 182.3    | 305.8    | 263.5    | 138.8         | 226.7      | 1.6         |
| 209378_s_at  | FAM190B     | 1.35E-04 | 235.1      | 233.4      | 206.0      | 200.9       | 217.3       | 236.0       | 252.6       | 369.7   | 386.2   | 456.4   | 319.9    | 328.1    | 395.3    | 466.4    | 233.4         | 386.2      | 1.7         |
| 228362_s_at  | FAM26F      | 6.35E-04 | 121.3      | 61.8       | 156.2      | 59.2        | 234.1       | 164.5       | 133.5       | 322.3   | 200.1   | 450.5   | 217.9    | 296.1    | 259.9    | 313.4    | 133.5         | 296.1      | 2.2         |
| 229390_at    | FAM26F      | 2.51E-03 | 322.9      | 166.6      | 587.2      | 107.6       | 571.1       | 465.2       | 462.5       | 909.9   | 483.1   | 1560.7  | 731.5    | 809.7    | 658.0    | 902.5    | 462.5         | 809.7      | 1.8         |
| 229391_s_at  | FAM26F      | 1.46E-04 | 183.2      | 83.0       | 196.3      | 81.7        | 241.9       | 164.0       | 155.4       | 360.7   | 210.0   | 454.4   | 223.6    | 352.6    | 267.8    | 339.6    | 164.0         | 339.6      | 2.1         |
| 229543_at    | FAM26F      | 2.44E-03 | 165.3      | 85.8       | 304.3      | 61.4        | 311.4       | 250.2       | 266.9       | 440.7   | 270.6   | 927.7   | 378.4    | 405.1    | 374.3    | 485.0    | 250.2         | 405.1      | 1.6         |
| 208092_s_at  | FAM49A      | 3.73E-04 | 311.7      | 326.4      | 411.3      | 354.3       | 498.4       | 500.7       | 406.9       | 574.1   | 649.6   | 820.4   | 657.0    | 920.7    | 595.6    | 1036.1   | 406.9         | 657.0      | 1.6         |
| 223038_s_at  | FAM60A      | 2.63E-03 | 349.0      | 261.8      | 275.7      | 386.9       | 360.0       | 273.4       | 283.9       | 495.9   | 305.2   | 362.5   | 460.2    | 497.0    | 437.2    | 414.3    | 283.9         | 437.2      | 1.5         |
| LOC728115    |             |          |            |            |            |             |             |             |             |         |         |         |          |          |          |          |               |            |             |
| 206707_x_at  | FAM65B      | 2.43E-05 | 58.0       | 57.6       | 74.2       | 90.0        | 54.3        | 67.3        | 89.2        | 146.6   | 156.6   | 342.3   | 217.1    | 218.2    | 284.3    | 456.6    | 67.3          | 218.2      | 3.2         |
| 209829_at    | FAM65B      | 1.55E-04 |            |            |            |             |             |             |             |         |         |         |          |          |          |          |               |            |             |

TRANSCRIPTION PROFILES IN ALVEOLAR MACROPHAGES

Supplementary Table S1. Continued.

| ID          | Gene Symbol | p-value  | VW3_Saline | VW6_Saline | VW7_Saline | VW13_Saline | VW22_Saline | VW23_Saline | VW25_Saline | VW3_LPS | VW6_LPS | VW7_LPS | VW13_LPS | VW22_LPS | VW23_LPS | VW25_LPS | Median_saline | Median_LPS | Fold change |
|-------------|-------------|----------|------------|------------|------------|-------------|-------------|-------------|-------------|---------|---------|---------|----------|----------|----------|----------|---------------|------------|-------------|
| 219608_s_at | FBXO38      | 7.54E-03 | 297.9      | 242.0      | 311.1      | 319.8       | 366.3       | 330.0       | 285.4       | 425.4   | 296.5   | 381.9   | 410.2    | 428.6    | 405.2    | 328.4    | 311.1         | 405.2      | 1.3         |
| 231769_at   | FBXO6       | 1.12E-05 | 114.1      | 102.8      | 178.3      | 179.0       | 181.1       | 158.5       | 166.8       | 297.3   | 194.0   | 426.7   | 371.5    | 368.8    | 367.2    | 361.2    | 166.8         | 367.2      | 2.2         |
| 218941_at   | FBXW2       | 3.18E-03 | 303.3      | 249.5      | 304.2      | 313.2       | 293.4       | 277.7       | 314.4       | 375.8   | 305.1   | 432.8   | 371.3    | 449.6    | 376.7    | 402.6    | 303.3         | 376.7      | 1.2         |
| 207674_at   | FCAR        | 8.13E-03 | 200.4      | 27.1       | 19.0       | 223.7       | 349.9       | 275.7       | 85.8        | 262.3   | 359.0   | 477.5   | 498.6    | 668.0    | 559.0    | 603.9    | 200.4         | 498.6      | 2.5         |
| 211307_s_at | FCAR        | 2.09E-03 | 140.9      | 64.5       | 70.0       | 109.4       | 144.9       | 113.0       | 67.7        | 167.5   | 125.9   | 180.9   | 147.3    | 375.1    | 292.2    | 289.4    | 109.4         | 180.9      | 1.7         |
| 211816_x_at | FCAR        | 4.12E-03 | 76.2       | 46.1       | 32.7       | 77.3        | 89.1        | 70.0        | 54.8        | 83.0    | 87.5    | 117.2   | 90.3     | 183.7    | 159.5    | 158.3    | 70.0          | 117.2      | 1.7         |
| 205237_at   | FCN1        | 2.65E-04 | 55.0       | 43.2       | 161.5      | 103.6       | 112.9       | 112.2       | 150.9       | 294.5   | 127.7   | 283.7   | 222.2    | 748.6    | 328.3    | 648.5    | 112.2         | 294.5      | 2.6         |
| 221345_at   | FFAR2       | 6.25E-05 | 41.9       | 49.4       | 51.4       | 51.8        | 59.7        | 40.4        | 57.0        | 110.7   | 155.7   | 365.2   | 135.4    | 316.7    | 317.5    | 294.4    | 51.4          | 294.4      | 5.7         |
| 215602_at   | FGD2        | 9.86E-03 | 178.7      | 176.1      | 264.9      | 223.7       | 174.1       | 149.3       | 203.3       | 257.6   | 189.7   | 364.2   | 228.5    | 241.8    | 212.2    | 279.1    | 178.7         | 241.8      | 1.4         |
| 205014_at   | FGFBP1      | 7.22E-03 | 56.9       | 59.0       | 45.5       | 64.4        | 48.2        | 46.0        | 34.1        | 86.3    | 99.0    | 53.4    | 72.5     | 66.5     | 51.2     | 51.3     | 48.2          | 66.5       | 1.4         |
| 219910_at   | FICD        | 1.94E-03 | 77.1       | 63.8       | 80.5       | 74.9        | 89.9        | 82.9        | 98.7        | 112.7   | 81.2    | 126.4   | 133.6    | 137.9    | 131.7    | 108.1    | 80.5          | 126.4      | 1.6         |
| 219522_at   | FJX1        | 3.02E-04 | 92.7       | 84.7       | 56.5       | 113.1       | 86.6        | 51.5        | 82.1        | 131.5   | 239.6   | 415.5   | 383.2    | 270.1    | 205.1    | 395.2    | 84.7          | 270.1      | 3.2         |
| 206857_s_at | FKBP1B      | 7.44E-03 | 71.7       | 61.3       | 46.7       | 82.9        | 61.1        | 31.8        | 39.9        | 79.4    | 92.1    | 126.8   | 88.0     | 93.8     | 76.1     | 92.4     | 61.1          | 92.1       | 1.5         |
| 204560_at   | FKBP5       | 6.24E-03 | 562.7      | 495.2      | 452.9      | 596.0       | 421.7       | 380.5       | 352.9       | 718.7   | 564.5   | 578.0   | 716.6    | 587.6    | 731.2    | 515.3    | 452.9         | 587.6      | 1.3         |
| 224840_at   | FKBP5       | 4.68E-03 | 1455.5     | 1275.7     | 1365.0     | 1817.5      | 1326.1      | 1199.4      | 1225.9      | 1941.0  | 1523.2  | 1810.0  | 2256.1   | 1540.6   | 1768.1   | 1519.8   | 1326.1        | 1768.1     | 1.3         |
| 224856_at   | FKBP5       | 7.14E-03 | 686.8      | 736.6      | 731.9      | 864.9       | 673.4       | 639.2       | 618.1       | 1095.8  | 793.6   | 897.2   | 1100.8   | 868.6    | 974.4    | 755.9    | 686.8         | 897.2      | 1.3         |
| 227882_at   | FKRP        | 4.17E-04 | 83.2       | 79.0       | 108.2      | 108.7       | 131.4       | 126.8       | 112.9       | 127.5   | 111.5   | 191.1   | 161.9    | 169.9    | 183.3    | 173.7    | 108.7         | 169.9      | 1.6         |
| 219906_at   | FLJ10213    | 1.67E-03 | 104.1      | 87.9       | 132.2      | 141.3       | 122.8       | 113.9       | 138.9       | 133.2   | 114.3   | 254.0   | 175.6    | 189.8    | 168.5    | 209.0    | 122.8         | 175.6      | 1.4         |
| 241627_x_at | FLJ10357    | 8.59E-04 | 209.4      | 163.2      | 103.1      | 116.5       | 163.2       | 108.1       | 112.6       | 251.8   | 269.2   | 164.9   | 168.7    | 253.8    | 147.1    | 214.4    | 116.5         | 214.4      | 1.8         |
| 233210_at   | FLJ12120    | 2.45E-03 | 36.9       | 11.2       | 48.0       | 43.8        | 57.0        | 91.8        | 66.5        | 88.2    | 64.6    | 792.1   | 174.6    | 116.2    | 182.8    | 149.0    | 48.0          | 149.0      | 3.1         |
| 235291_s_at | FLJ32255    | 3.13E-03 | 419.9      | 398.6      | 476.0      | 408.3       | 515.4       | 576.3       | 518.5       | 569.8   | 596.3   | 971.4   | 500.1    | 627.1    | 764.7    | 824.1    | 476.0         | 627.1      | 1.3         |
| 238432_at   | FLJ35776    | 6.91E-03 | 221.5      | 203.6      | 159.4      | 175.3       | 280.0       | 164.5       | 217.4       | 255.9   | 221.8   | 218.8   | 224.1    | 391.7    | 298.0    | 306.4    | 203.6         | 255.9      | 1.3         |
| 239421_at   | FLJ35776    | 1.83E-03 | 48.2       | 38.9       | 50.1       | 46.4        | 54.8        | 42.3        | 44.0        | 52.7    | 55.6    | 90.4    | 70.9     | 78.3     | 58.0     | 72.9     | 46.4          | 70.9       | 1.5         |
| 229521_at   | FLJ36031    | 1.11E-03 | 192.3      | 167.3      | 267.4      | 248.2       | 338.5       | 243.0       | 280.5       | 296.0   | 411.8   | 594.4   | 372.5    | 419.0    | 405.5    | 443.9    | 248.2         | 411.8      | 1.7         |
| 1558234_at  | FLJ36644    | 2.96E-03 | 39.1       | 39.6       | 33.8       | 35.2        | 51.6        | 32.8        | 30.5        | 49.9    | 56.5    | 156.8   | 68.7     | 82.3     | 87.0     | 81.9     | 35.2          | 81.9       | 2.3         |
| 238874_at   | FLJ43663    | 2.38E-03 | 48.1       | 49.5       | 40.8       | 45.0        | 37.5        | 53.3        | 40.8        | 56.1    | 65.5    | 66.7    | 61.2     | 53.9     | 66.1     | 56.1     | 45.0          | 61.2       | 1.4         |
| 208748_s_at | FLOT1       | 3.08E-04 | 68.3       | 85.3       | 63.5       | 87.0        | 103.7       | 81.1        | 105.1       | 122.3   | 130.5   | 163.8   | 175.3    | 143.7    | 187.2    | 182.7    | 85.3          | 163.8      | 1.9         |
| 222033_s_at | FLT1        | 2.40E-03 | 46.0       | 39.7       | 34.3       | 40.0        | 39.0        | 23.2        | 49.4        | 73.2    | 69.9    | 272.8   | 108.8    | 67.5     | 75.1     | 110.9    | 39.7          | 75.1       | 1.9         |
| 226497_s_at | FLT1        | 2.88E-05 | 15.9       | 7.1        | 23.9       | 10.8        | 22.7        | 13.9        | 31.2        | 71.7    | 44.5    | 403.9   | 120.7    | 91.2     | 70.5     | 174.6    | 15.9          | 91.2       | 5.7         |
| 226498_at   | FLT1        | 3.96E-04 | 27.6       | 25.7       | 22.8       | 23.2        | 24.7        | 18.3        | 30.1        | 81.0    | 52.8    | 275.0   | 86.2     | 110.6    | 44.9     | 122.4    | 24.7          | 86.2       | 3.5         |
| 232249_at   | FMNL3       | 2.58E-03 | 1725.2     | 1659.7     | 1403.1     | 1315.5      | 1602.2      | 1532.1      | 1811.7      | 2304.3  | 1845.3  | 2298.1  | 2075.5   | 2308.5   | 2139.5   | 2277.0   | 1602.2        | 2277.0     | 1.4         |
| 212228_at   | FNBP1       | 8.22E-03 | 466.7      | 524.8      | 494.6      | 602.0       | 622.1       | 530.8       | 604.7       | 602.3   | 611.5   | 943.2   | 726.6    | 714.6    | 744.9    | 850.8    | 530.8         | 726.6      | 1.4         |
| 218618_s_at | FNDC3B      | 1.76E-03 | 823.8      | 712.4      | 542.0      | 817.5       | 921.5       | 738.0       | 863.5       | 1014.6  | 1073.8  | 1239.3  | 1195.9   | 1313.7   | 1334.1   | 1186.4   | 817.5         | 1195.9     | 1.5         |
| 222629_s_at | FNDC3B      | 8.53E-03 | 931.5      | 773.8      | 785.9      | 932.5       | 1016.6      | 879.7       | 1305.7      | 981.2   | 1403.8  | 1843.5  | 1441.4   | 1197.2   | 1247.2   | 1730.8   | 931.5         | 1403.8     | 1.5         |
| 229865_at   | FNDC3B      | 3.26E-05 | 202.8      | 166.6      | 267.3      | 312.3       | 322.8       | 216.2       | 342.5       | 551.4   | 748.7   | 1387.0  | 906.0    | 651.4    | 844.1    | 1211.0   | 267.3         | 844.1      | 3.2         |
| 242029_s_at | FNDC3B      | 5.80E-03 | 88.1       | 70.2       | 77.4       | 81.9        | 96.5        | 77.4        | 87.7        | 90.8    | 89.7    | 126.3   | 127.6    | 114.1    | 112.4    | 131.4    | 81.9          | 114.1      | 1.4         |
| 225922_at   | FNIP2       | 4.68E-03 | 547.9      | 398.3      | 995.5      | 685.6       | 984.5       | 670.8       | 1407.1      | 887.7   | 1009.5  | 2328.0  | 974.1    | 1098.3   | 979.9    | 1850.8   | 685.6         | 1009.5     | 1.5         |
| 225924_at   | FNIP2       | 3.51E-03 | 268.6      | 160.3      | 365.5      | 286.2       | 424.7       | 319.5       | 486.0       | 394.0   | 414.5   | 865.3   | 406.9    | 559.4    | 411.9    | 706.3    | 319.5         | 414.5      | 1.3         |
| 226460_at   | FNIP2       | 1.67E-03 | 551.8      | 327.1      | 715.1      | 532.9       | 820.3       | 439.3       | 1003.8      | 821.8   | 930.9   | 1921.5  | 779.7    | 1146.1   | 837.1    | 1468.5   | 551.8         | 930.9      | 1.7         |
| 202768_at   | FOSB        | 3.47E-03 | 112.1      | 74.6       | 97.4       | 92.8        | 108.1       | 112.1       | 97.1        | 119.8   | 107.3   | 155.7   | 112.4    | 188.9    | 169.5    | 189.6    | 97.4          | 155.7      | 1.6         |
| 204420_at   | FOSL1       | 7.14E-05 | 36.2       | 40.9       | 43.2       | 40.5        | 41.1        | 30.9        | 51.7        | 62.5    | 59.3    | 89.9    | 73.1     | 93.0     | 64.6     | 98.1     | 40.9          | 73.1       | 1.8         |
| 218880_at   | FOSL2       | 3.91E-04 | 143.6      | 132.6      | 146.8      | 173.0       | 232.0       | 151.7       | 218.7       | 229.5   | 193.9   | 376.4   | 258.3    | 431.2    | 328.0    | 355.7    | 151.7         | 328.0      | 2.2         |
| 218881_s_at | FOSL2       | 1.63E-03 | 71.9       | 64.6       | 87.1       | 110.8       | 150.8       | 95.1        | 125.1       | 128.9   | 82.7    | 162.6   | 140.3    | 206.7    | 172.5    | 166.0    | 95.1          | 162.6      | 1.7         |
| 225262_at   | FOSL2       | 6.36E-03 | 129.2      | 123.5      | 191.3      | 196.4       | 293.9       | 221.4       | 253.0       | 210.6   | 164.8   | 367.9   | 260.5    | 342.2    | 247.7    | 340.0    | 196.4         | 260.5      | 1.3         |
| 205119_s_at | FPR1        | 2.95E-04 | 1152.6     | 585.0      | 753.6      | 998.0       | 1100.0      | 429.0       | 975.6       | 1843.9  | 1506.8  | 2773.5  | 2006.4   | 2412.3   | 2066.6   | 2353.6   | 975.6         | 2066.6     | 2.1         |
| 210772_at   | FPR2        | 6.81E-05 | 238.9      | 256.1      | 282.2      | 275.0       | 464.5       | 241.5       | 518.6       | 594.1   | 1342.4  | 2034.8  | 1071.0   | 1009.6   | 1223.6   | 1810.4   | 275.0         | 1223.6     | 4.4         |
| 210773_s_at | FPR2        | 1.15E-05 | 175.5      | 207.8      | 219.7      | 179.3       | 309.8       | 139.4       | 328.4       | 564.0   | 1120.8  | 1509.5  | 804.6    | 1053.0   | 1155.1   | 1469.2   | 207.8         | 1120.8     | 5.4         |
| 214560_at   | FPR3        | 4.25E-03 | 3071.3     | 2333.0     | 670.1      | 1041.9      | 1987.7      | 475.3       | 1038.2      | 3510.5  | 3310.8  | 1141.7  | 1848.1   | 2948.9   | 1681.1   | 2315.7   | 1041.9        | 2315.7     | 2.2         |
| 230422_at   | FPR3        | 4.53E-03 | 1373.7     | 916.3      | 323.2      | 423.1       | 896.2       | 206.0       | 489.5       | 1443.4  | 1649.2  | 578.0   | 742.5    | 1146.0   | 677.8    | 1060.5   | 489.5         | 1060.5     | 2.2         |
| 229893_at   | FRMD3       | 2.93E-04 | 42.5       | 68.7       | 51.5       | 44.2        | 49.9        | 41.8        | 45.9        | 87.7    | 157.1   | 167.5   | 138.6    | 90.5     | 56.6     | 110.9    | 45.9          | 110.9      | 2.4         |
| 230645_at   | FRMD3       | 2.60E-03 | 30.2       | 44.2       | 26.5       | 27.2        | 30.2        | 28.0        | 30.2        | 61.5    | 67.7    | 102.7   | 73.7     | 48.4     | 31.2     | 73.2     | 30.2          | 67.7       | 2.2         |
| 210933_s_at | FSCN1       | 1.48E-04 | 31.9       | 26.8       | 19.6       | 48.6        | 69.1        | 25.1        | 31.4        | 86.6    | 55.2    | 107.2   | 97.6     | 146.7    | 84.3     | 103.2    | 31.4          | 97.6       | 3.1         |
| 242586_at   | FSD1L       | 2.39E-03 | 28.8       | 47.8       | 53.5       | 73.4        | 63.0        | 66.7        | 100.1       | 63.1    | 76.6    | 171.9   | 157.4    | 96.3     | 77.7     | 152.3    | 63.0          | 96.3       | 1.5         |
| 242807_at   | FSD1L       | 2.66E-03 | 42.7       | 38.0       | 50.0       | 60.2        | 60.9        | 60.2        | 57.3        | 56.8    | 61.7    | 125.4   | 143.1    | 81.5     | 72.7     | 116.1    | 57.3          | 81.5       | 1.4         |
| 212380_at   | FTSJD2      | 6.48E-05 | 225.4      | 263.9      | 321.8      | 275.9       | 263.5       | 260.3       | 261.5       | 376.1   | 390.5   | 624.8   | 485.0    | 471.3    | 527.9    | 556.0    | 263.5         | 485.0      | 1.8         |
| 203091_at   | FUBP1       | 2.92E-03 | 1113.6     | 889.3      | 1108.7     | 990.9       | 1199.5      | 1065.7      | 1212.4      | 1494.4  | 1252.0  | 1505.1  | 1181.4   | 1496.8   | 1420.7   | 1460.6   | 1108.7        | 1460.6     | 1.3         |
| 1565716_at  | FUS         | 5.91E-03 | 283.8      | 222.1      | 303.6      | 283.5       | 279.1       | 237.9       | 246.5       | 364.7   | 273.3   | 473.3   | 352.7    | 361.3    | 259.0    | 340.5    | 279.1         | 352.7      | 1.3         |
| 209892_at   | FUT4        | 9.30E-05 | 336.6      | 289.8      | 497.0      | 427.3       | 496.8       | 410.9       | 546.1       | 739.7   | 890.3   | 1597.2  | 956.7    | 792.3    | 812.1    | 1156.4   | 427.3         | 890.3      | 2.1         |
| 209893_s_at | FUT4        | 4.69E-05 | 683.2      | 603.1      | 751.2      | 586.7       | 726.8       | 603.1       | 697.9       | 1167.2  | 1566.7  | 2298.1  | 1607.2   | 1301.1   | 1389.0   | 1751.5   | 683.2         | 1566.7     | 2.3</       |

Supplementary Table S1. Continued.

| ID           | Gene Symbol       | p-value  | VW3_Saline | VW6_Saline | VW7_Saline | VW13_Saline | VW22_Saline | VW23_Saline | VW25_Saline | VW3_LPS | VW6_LPS | VW7_LPS | VW13_LPS | VW22_LPS | VW23_LPS | VW25_LPS | Median_saline | Median_LPS | Fold change |
|--------------|-------------------|----------|------------|------------|------------|-------------|-------------|-------------|-------------|---------|---------|---------|----------|----------|----------|----------|---------------|------------|-------------|
| 206173_x_at  | GABPB1            | 2.99E-03 | 143.3      | 105.0      | 161.6      | 191.7       | 234.5       | 177.7       | 189.8       | 217.5   | 190.6   | 318.0   | 260.3    | 260.5    | 245.4    | 252.5    | 177.7         | 252.5      | 1.4         |
| 207574_s_at  | GADD45B           | 6.41E-03 | 823.0      | 771.6      | 1041.6     | 928.0       | 1040.7      | 850.2       | 828.3       | 1069.6  | 1450.7  | 1490.9  | 859.4    | 1690.0   | 1264.7   | 1458.5   | 850.2         | 1450.7     | 1.7         |
| 209305_s_at  | GADD45B           | 7.01E-03 | 246.8      | 173.0      | 258.2      | 253.3       | 275.1       | 220.0       | 238.8       | 278.0   | 295.2   | 412.0   | 243.1    | 612.7    | 436.2    | 408.7    | 246.8         | 408.7      | 1.7         |
| 213560_at    | GADD45B           | 7.81E-03 | 768.7      | 667.0      | 1010.6     | 923.8       | 957.4       | 847.9       | 875.1       | 944.1   | 1311.0  | 1517.0  | 868.8    | 1716.4   | 1178.4   | 1388.9   | 875.1         | 1311.0     | 1.5         |
| 204121_at    | GADD45G           | 5.52E-04 | 61.3       | 40.2       | 72.1       | 55.7        | 84.3        | 42.0        | 65.5        | 81.8    | 68.8    | 138.8   | 121.4    | 118.8    | 65.6     | 98.1     | 61.3          | 98.1       | 1.6         |
| 220442_at    | GALNT4 /// WDR51B | 9.62E-03 | 96.2       | 90.7       | 97.4       | 115.0       | 153.0       | 118.9       | 117.9       | 117.6   | 117.7   | 176.5   | 159.8    | 151.3    | 162.4    | 165.9    | 115.0         | 159.8      | 1.4         |
| 202269_x_at  | GBP1              | 1.12E-04 | 6421.0     | 4447.9     | 4830.7     | 4359.5      | 6875.0      | 3459.5      | 7241.3      | 11982.3 | 14845.6 | 17039.3 | 14186.9  | 12458.7  | 13198.8  | 15139.6  | 4830.7        | 14186.9    | 2.9         |
| 202270_at    | GBP1              | 3.61E-05 | 138.9      | 120.3      | 247.7      | 224.5       | 318.1       | 168.0       | 440.2       | 547.4   | 790.1   | 1788.8  | 983.9    | 765.7    | 818.8    | 1235.5   | 224.5         | 818.8      | 3.6         |
| 231577_s_at  | GBP1              | 1.25E-04 | 4628.5     | 3382.8     | 4100.8     | 3907.2      | 4983.8      | 2588.3      | 6033.9      | 8340.1  | 11477.8 | 13095.6 | 10855.7  | 9356.9   | 10176.6  | 11979.7  | 4100.8        | 10855.7    | 2.6         |
| 231578_at    | GBP1              | 1.05E-04 | 46.1       | 46.4       | 64.4       | 46.4        | 46.4        | 32.8        | 42.3        | 85.8    | 124.0   | 448.3   | 215.7    | 148.0    | 113.9    | 216.7    | 46.4          | 148.0      | 3.2         |
| 202748_at    | GBP2              | 3.14E-04 | 5640.6     | 6444.1     | 6113.0     | 6544.7      | 6876.0      | 5516.0      | 5634.5      | 7838.2  | 10459.8 | 12001.3 | 10405.0  | 9415.8   | 10876.1  | 11157.8  | 6113.0        | 10459.8    | 1.7         |
| 223434_at    | GBP3              | 2.45E-03 | 173.6      | 275.1      | 564.5      | 312.3       | 110.7       | 438.0       | 672.4       | 415.2   | 491.2   | 1497.3  | 587.9    | 144.4    | 501.6    | 1029.2   | 312.3         | 501.6      | 1.6         |
| 235175_at    | GBP4              | 4.18E-06 | 360.5      | 324.8      | 435.8      | 380.4       | 448.1       | 317.1       | 443.0       | 1080.7  | 1480.1  | 2020.6  | 1472.9   | 1294.2   | 1162.5   | 1770.2   | 380.4         | 1472.9     | 3.9         |
| 235574_at    | GBP4              | 2.65E-06 | 301.9      | 397.2      | 483.1      | 413.8       | 537.2       | 373.5       | 431.2       | 1124.7  | 1468.5  | 2308.5  | 1479.0   | 1507.3   | 1321.9   | 1805.0   | 413.8         | 1479.0     | 3.6         |
| 229625_at    | GBP5              | 7.57E-06 | 812.0      | 1336.0     | 1162.3     | 935.5       | 1370.4      | 662.1       | 1301.8      | 2325.2  | 4348.1  | 6060.6  | 4733.1   | 4583.0   | 3629.8   | 5135.1   | 1162.3        | 4583.0     | 3.9         |
| 238581_at    | GBP5              | 6.71E-06 | 97.4       | 252.1      | 247.8      | 268.4       | 348.0       | 180.7       | 322.4       | 375.9   | 896.5   | 1442.6  | 1689.0   | 1051.2   | 701.2    | 1370.1   | 252.1         | 1051.2     | 4.2         |
| 204224_s_at  | GCH1              | 5.39E-04 | 2718.1     | 961.4      | 1624.4     | 1752.2      | 3913.0      | 774.3       | 4438.7      | 6600.0  | 9690.2  | 12641.8 | 10204.3  | 8779.9   | 9460.9   | 10596.7  | 1752.2        | 9690.2     | 5.5         |
| 211020_at    | GCNT2             | 1.30E-03 | 89.6       | 94.1       | 103.6      | 82.1        | 106.2       | 109.9       | 99.6        | 145.7   | 105.5   | 163.4   | 135.4    | 146.6    | 148.9    | 161.6    | 99.6          | 146.6      | 1.5         |
| 230788_at    | GCNT2             | 3.77E-03 | 423.4      | 552.6      | 374.9      | 325.9       | 370.8       | 465.8       | 476.9       | 573.2   | 729.2   | 807.6   | 575.6    | 485.9    | 541.3    | 697.9    | 423.4         | 575.6      | 1.4         |
| 220831_at    | GCNT4             | 2.77E-04 | 50.0       | 49.7       | 24.5       | 11.8        | 15.5        | 17.7        | 24.9        | 76.3    | 163.8   | 314.3   | 84.5     | 110.9    | 96.7     | 150.3    | 24.5          | 110.9      | 4.5         |
| 202721_s_at  | GFPT1             | 6.82E-03 | 741.7      | 705.1      | 578.1      | 664.8       | 696.1       | 667.2       | 555.2       | 819.8   | 891.5   | 841.1   | 847.2    | 777.0    | 923.7    | 786.5    | 667.2         | 841.1      | 1.3         |
| 205582_s_at  | GGT5              | 3.17E-03 | 44.1       | 28.7       | 53.7       | 42.1        | 53.3        | 40.5        | 56.2        | 59.3    | 38.1    | 64.1    | 58.5     | 66.5     | 57.2     | 66.3     | 44.1          | 59.3       | 1.3         |
| 223278_at    | GJB2              | 1.05E-04 | 38.3       | 43.9       | 42.8       | 43.7        | 143.2       | 26.1        | 95.5        | 193.0   | 253.8   | 997.9   | 220.5    | 605.8    | 400.9    | 403.1    | 43.7          | 400.9      | 9.2         |
| 207387_s_at  | GK                | 6.94E-03 | 3074.4     | 2035.0     | 2699.4     | 2600.3      | 3309.6      | 2602.1      | 3969.6      | 3195.0  | 3250.0  | 4399.9  | 3601.6   | 4018.2   | 3670.5   | 4793.9   | 2699.4        | 3670.5     | 1.4         |
| 215975_x_at  | GK                | 1.07E-03 | 1552.0     | 968.8      | 1091.6     | 1072.8      | 1593.3      | 1089.1      | 1731.7      | 1903.4  | 1647.2  | 2514.4  | 1608.9   | 2408.0   | 1998.3   | 2482.7   | 1091.6        | 1998.3     | 1.8         |
| 215977_x_at  | GK                | 4.22E-03 | 1082.9     | 552.8      | 767.0      | 729.3       | 996.5       | 673.6       | 1115.3      | 1125.5  | 1046.1  | 1459.0  | 945.0    | 1444.5   | 1398.3   | 1532.2   | 767.0         | 1398.3     | 1.8         |
| 217167_x_at  | GK                | 3.18E-03 | 1050.3     | 537.6      | 732.3      | 733.5       | 979.8       | 626.9       | 1092.1      | 1150.9  | 1037.7  | 1403.6  | 952.5    | 1426.4   | 1340.6   | 1519.7   | 733.5         | 1340.6     | 1.8         |
| 216316_x_at  | GK /// GK3P       | 4.86E-03 | 230.6      | 137.3      | 241.0      | 214.6       | 267.4       | 218.1       | 341.2       | 286.4   | 297.7   | 470.1   | 280.2    | 335.9    | 349.8    | 410.9    | 230.6         | 335.9      | 1.5         |
| 215966_x_at  | GK3P              | 1.73E-03 | 235.9      | 137.8      | 176.9      | 174.5       | 250.8       | 169.6       | 285.1       | 284.5   | 244.9   | 374.4   | 258.5    | 357.6    | 334.6    | 368.4    | 176.9         | 334.6      | 1.9         |
| 1553772_at   | GK5               | 2.68E-04 | 77.6       | 82.5       | 99.5       | 83.0        | 88.4        | 101.9       | 97.5        | 135.9   | 100.5   | 166.4   | 143.2    | 181.7    | 182.3    | 177.9    | 88.4          | 166.4      | 1.9         |
| 227376_at    | GLI3              | 1.73E-03 | 91.8       | 43.5       | 60.2       | 56.7        | 63.0        | 50.0        | 70.6        | 115.8   | 71.4    | 82.2    | 78.0     | 76.0     | 68.9     | 118.7    | 60.2          | 78.0       | 1.3         |
| 230258_at    | GLI3              | 2.07E-03 | 61.4       | 71.1       | 92.6       | 94.5        | 48.0        | 91.9        | 80.0        | 124.9   | 78.1    | 221.8   | 195.0    | 86.8     | 182.6    | 97.3     | 80.0          | 124.9      | 1.6         |
| 209080_x_at  | GLRX3             | 5.91E-03 | 426.8      | 384.9      | 407.2      | 475.3       | 483.1       | 406.2       | 447.4       | 524.3   | 474.1   | 632.9   | 558.9    | 586.5    | 539.7    | 550.5    | 426.8         | 550.5      | 1.3         |
| 211414_at    | GLS               | 6.39E-03 | 25.9       | 37.5       | 44.5       | 42.6        | 41.9        | 55.5        | 42.4        | 46.6    | 60.2    | 68.0    | 89.0     | 70.5     | 51.2     | 53.1     | 42.4          | 60.2       | 1.4         |
| 223079_s_at  | GLS               | 1.46E-03 | 432.2      | 439.0      | 644.9      | 623.4       | 549.2       | 619.3       | 696.9       | 629.9   | 704.6   | 1219.5  | 896.0    | 689.7    | 789.9    | 938.6    | 619.3         | 789.9      | 1.3         |
| 219920_s_at  | GMPPB             | 5.65E-03 | 211.7      | 155.2      | 192.5      | 195.9       | 182.9       | 201.6       | 214.4       | 235.7   | 170.4   | 248.7   | 289.7    | 262.5    | 306.7    | 290.7    | 195.9         | 262.5      | 1.3         |
| 204187_at    | GMPR              | 6.62E-04 | 732.1      | 288.3      | 347.2      | 359.5       | 239.5       | 251.4       | 185.0       | 864.8   | 916.5   | 1006.4  | 769.1    | 1075.9   | 1112.9   | 964.8    | 288.3         | 964.8      | 3.3         |
| 221737_at    | GNAI2             | 2.71E-03 | 319.3      | 245.5      | 255.6      | 283.1       | 355.7       | 234.3       | 320.7       | 453.3   | 315.3   | 347.4   | 368.3    | 424.4    | 362.0    | 387.7    | 283.1         | 368.3      | 1.3         |
| 224681_at    | GNAI2             | 5.37E-03 | 230.9      | 184.4      | 254.4      | 293.4       | 341.5       | 248.3       | 367.9       | 385.8   | 216.8   | 406.9   | 384.7    | 436.7    | 430.3    | 402.6    | 254.4         | 402.6      | 1.6         |
| 206917_at    | GNAI3             | 9.25E-03 | 507.3      | 412.5      | 471.8      | 456.5       | 546.3       | 478.6       | 476.5       | 552.5   | 561.8   | 720.9   | 544.0    | 662.6    | 590.1    | 591.1    | 476.5         | 590.1      | 1.2         |
| 201179_s_at  | GNAI3             | 7.59E-03 | 2054.8     | 1510.7     | 1755.1     | 1876.7      | 2066.3      | 1664.4      | 2107.8      | 2297.0  | 2157.2  | 2585.5  | 2253.6   | 2275.6   | 2361.1   | 2758.9   | 1876.7        | 2297.0     | 1.2         |
| 223487_x_at  | GNB4              | 1.24E-03 | 171.9      | 227.7      | 260.5      | 257.8       | 245.5       | 241.5       | 265.5       | 241.5   | 319.1   | 549.1   | 388.8    | 379.5    | 294.8    | 417.3    | 245.5         | 379.5      | 1.5         |
| 223488_s_at  | GNB4              | 1.64E-04 | 693.1      | 528.2      | 625.3      | 532.2       | 578.5       | 557.8       | 552.8       | 887.6   | 990.7   | 1212.2  | 890.4    | 972.5    | 1015.9   | 1089.3   | 557.8         | 990.7      | 1.8         |
| 1555766_a_at | GNG2              | 1.30E-04 | 40.1       | 29.0       | 24.1       | 33.4        | 38.0        | 19.9        | 37.2        | 62.1    | 104.7   | 151.8   | 99.3     | 155.4    | 99.6     | 200.9    | 33.4          | 104.7      | 3.1         |
| 223943_s_at  | GNG2              | 4.87E-04 | 36.6       | 45.6       | 31.5       | 29.7        | 35.0        | 24.8        | 32.3        | 50.7    | 67.0    | 79.3    | 72.8     | 87.5     | 81.9     | 107.7    | 32.3          | 79.3       | 2.5         |
| 224964_s_at  | GNG2              | 3.03E-04 | 37.3       | 59.6       | 45.0       | 53.7        | 50.4        | 54.8        | 28.9        | 116.0   | 139.2   | 214.2   | 177.5    | 288.8    | 174.7    | 424.8    | 50.4          | 177.5      | 3.5         |
| 224965_at    | GNG2              | 1.75E-05 | 33.7       | 30.6       | 40.4       | 55.0        | 68.6        | 35.8        | 43.4        | 106.3   | 148.1   | 287.7   | 193.2    | 291.0    | 177.0    | 413.5    | 40.4          | 193.2      | 4.8         |
| 205495_s_at  | GNLY              | 3.01E-03 | 39.9       | 36.5       | 44.7       | 63.8        | 44.4        | 126.1       | 53.4        | 57.4    | 39.8    | 63.1    | 143.4    | 93.1     | 176.4    | 94.0     | 44.7          | 93.1       | 2.1         |
| 37145_at     | GNLY              | 3.27E-03 | 42.0       | 40.9       | 41.6       | 51.1        | 41.4        | 108.9       | 44.9        | 46.4    | 49.5    | 58.9    | 118.3    | 86.9     | 203.3    | 83.6     | 42.0          | 83.6       | 2.0         |
| 201567_s_at  | GOLGA4            | 3.53E-03 | 329.9      | 335.2      | 425.2      | 425.3       | 474.6       | 425.3       | 457.4       | 412.0   | 625.8   | 763.2   | 569.7    | 542.3    | 552.1    | 711.0    | 425.3         | 569.7      | 1.3         |
| 218193_s_at  | GOLT1B            | 8.10E-03 | 1137.5     | 816.7      | 982.0      | 1061.1      | 1107.5      | 1025.9      | 1209.0      | 1188.8  | 1273.0  | 2021.0  | 1570.3   | 1316.7   | 1333.0   | 1666.7   | 1061.1        | 1333.0     | 1.3         |
| 210009_s_at  | GOSR2             | 2.93E-03 | 143.0      | 126.7      | 154.9      | 151.0       | 145.0       | 127.5       | 156.0       | 199.2   | 146.2   | 225.7   | 192.1    | 200.1    | 183.7    | 186.2    | 145.0         | 192.1      | 1.3         |
| 223705_s_at  | GPPB1             | 3.14E-03 | 1097.6     | 1356.0     | 1475.8     | 1158.1      | 1496.0      | 1310.6      | 1388.0      | 1454.1  | 1836.4  | 2407.8  | 1655.2   | 1751.0   | 1541.6   | 1889.7   | 1356.0        | 1751.0     | 1.3         |
| 209220_at    | GPC3              | 1.61E-04 | 38.1       | 53.5       | 22.9       | 30.6        | 28.2        | 32.4        | 22.0        | 74.2    | 125.3   | 169.6   | 95.4     | 102.6    | 98.1     | 107.1    | 30.6          | 102.6      | 3.4         |
| 204983_s_at  | GPC4              | 3.37E-05 | 118.7      | 78.3       | 125.8      | 88.9        | 126.6       | 48.0        | 94.0        | 249.4   | 203.4   | 684.2   | 357.9    | 367.6    | 209.0    | 336.7    | 94.0          | 336.7      | 3.6         |
| 204984_at    | GPC4              | 9.39E-05 | 60.7       | 57.3       | 85.6       | 59.2        | 101.6       | 33.9        | 83.1        | 138.9   | 123.7   | 377.6   | 208.9    | 187.2    | 119.8    | 199.6    | 60.7          | 187.2      | 3.1         |
| 210007_s_at  | GPD2              | 2.09E-04 | 1368.5     | 1078.5     | 1087.2     | 1369.8      | 1618.3      | 1109.5      | 1713.5      | 2245.6  | 2948.7  | 3544.4  | 2720.3   | 2691.3   | 2817.9   | 3103.3   | 1368.5        | 2817.9     | 2.1         |
| 211613_s_at  | GPD2              | 1.32E-04 | 347.8      | 210.1      | 264.9      | 357.8       | 364.3       | 277.8       | 392.5       | 586.7   | 687.4   | 1029.0  | 662.7    | 840.6    | 828.2    | 889.6    | 347.8         | 828.2      | 2.4         |
| 225447_at    | GPD2              | 6.39E-04 | 803.9      | 528.5      |            |             |             |             |             |         |         |         |          |          |          |          |               |            |             |



TRANSCRIPTION PROFILES IN ALVEOLAR MACROPHAGES

Supplementary Table S1. Continued.

| ID           | Gene Symbol    | p-value  | VW3_Saline | VW6_Saline | VW7_Saline | VW13_Saline | VW22_Saline | VW23_Saline | VW25_Saline | VW3_LPS | VW6_LPS | VW7_LPS | VW13_LPS | VW22_LPS | VW23_LPS | VW25_LPS | Median_saline | Median_LPS | Fold change |
|--------------|----------------|----------|------------|------------|------------|-------------|-------------|-------------|-------------|---------|---------|---------|----------|----------|----------|----------|---------------|------------|-------------|
| 235961_at    | GPR161         | 8.59E-04 | 44.8       | 35.5       | 51.3       | 64.4        | 66.8        | 67.9        | 77.5        | 79.3    | 65.9    | 85.5    | 89.9     | 77.5     | 98.8     | 130.5    | 64.4          | 85.5       | 1.3         |
| 207651_at    | GPR171         | 4.07E-05 | 48.6       | 60.0       | 72.0       | 64.8        | 63.0        | 71.1        | 56.1        | 105.1   | 156.4   | 190.9   | 238.3    | 140.4    | 173.4    | 252.9    | 63.0          | 173.4      | 2.8         |
| 231871_at    | GPR180         | 4.60E-04 | 148.5      | 212.2      | 224.3      | 186.7       | 192.0       | 226.5       | 178.2       | 261.1   | 424.3   | 512.9   | 360.3    | 260.9    | 293.8    | 361.6    | 192.0         | 360.3      | 1.9         |
| 205419_at    | GPR183         | 2.59E-05 | 29.7       | 30.5       | 18.9       | 36.6        | 39.5        | 24.6        | 29.0        | 112.7   | 84.6    | 104.2   | 122.9    | 239.9    | 99.4     | 259.2    | 29.7          | 112.7      | 3.8         |
| 223767_at    | GPR84          | 1.71E-05 | 73.6       | 27.7       | 42.5       | 43.6        | 272.9       | 32.7        | 107.8       | 512.7   | 606.5   | 623.2   | 405.1    | 1156.4   | 632.2    | 904.8    | 43.6          | 623.2      | 14.3        |
| 220404_at    | GPR97          | 3.16E-04 | 20.6       | 18.7       | 34.5       | 36.6        | 48.2        | 35.1        | 28.9        | 43.7    | 57.1    | 175.2   | 57.6     | 94.2     | 97.8     | 101.3    | 34.5          | 94.2       | 2.7         |
| 224807_at    | GRAMD1A        | 1.16E-05 | 134.3      | 75.2       | 119.2      | 130.8       | 176.7       | 103.7       | 197.0       | 323.3   | 284.5   | 629.5   | 378.0    | 551.6    | 459.7    | 681.3    | 130.8         | 459.7      | 3.5         |
| 244808_at    | GRAMD1A        | 2.43E-05 | 232.8      | 154.2      | 258.9      | 138.0       | 300.9       | 99.3        | 265.7       | 623.5   | 616.1   | 1853.4  | 611.0    | 941.8    | 746.7    | 1241.9   | 232.8         | 746.7      | 3.2         |
| 218706_s_at  | GRAMD3         | 9.58E-04 | 121.8      | 97.8       | 141.8      | 122.1       | 134.6       | 116.0       | 145.6       | 166.3   | 202.4   | 414.0   | 208.1    | 187.8    | 206.4    | 243.5    | 122.1         | 206.4      | 1.7         |
| 228263_at    | GRASP          | 8.22E-03 | 62.2       | 53.5       | 57.6       | 62.3        | 67.0        | 59.2        | 56.2        | 64.2    | 64.9    | 76.5    | 77.4     | 85.0     | 84.2     | 79.6     | 59.2          | 77.4       | 1.3         |
| 202554_s_at  | GSTM3          | 4.00E-03 | 43.8       | 76.5       | 88.3       | 73.3        | 83.1        | 37.8        | 120.8       | 80.0    | 101.0   | 162.1   | 91.3     | 106.8    | 66.2     | 136.4    | 76.5          | 101.0      | 1.3         |
| 208066_s_at  | GTF2B          | 5.57E-04 | 1525.8     | 1529.5     | 1227.3     | 1301.6      | 1376.8      | 1272.6      | 1230.7      | 1953.2  | 2438.7  | 2928.8  | 1939.5   | 2446.8   | 2159.0   | 2549.6   | 1301.6        | 2438.7     | 1.9         |
| 202680_at    | GTF2E2         | 1.39E-03 | 509.9      | 526.9      | 492.3      | 533.2       | 504.3       | 496.7       | 576.4       | 631.1   | 866.2   | 908.1   | 710.0    | 691.1    | 725.0    | 775.9    | 509.9         | 725.0      | 1.4         |
| 205274_at    | GTPBP1         | 3.08E-04 | 39.0       | 27.6       | 50.1       | 40.1        | 35.7        | 37.6        | 46.3        | 51.5    | 45.3    | 90.5    | 61.3     | 61.2     | 78.7     | 69.2     | 39.0          | 61.3       | 1.6         |
| 219357_at    | GTPBP1         | 3.91E-05 | 154.0      | 110.9      | 175.4      | 153.1       | 183.7       | 171.4       | 161.7       | 277.1   | 236.0   | 341.2   | 246.2    | 296.6    | 325.1    | 300.2    | 161.7         | 296.6      | 1.8         |
| 226359_at    | GTPBP1         | 4.70E-03 | 67.9       | 52.7       | 82.3       | 72.7        | 65.4        | 71.1        | 77.1        | 92.4    | 58.2    | 119.6   | 98.1     | 135.1    | 145.4    | 101.2    | 71.1          | 101.2      | 1.4         |
| 221050_s_at  | GTPBP2         | 5.45E-03 | 489.3      | 579.9      | 409.1      | 444.7       | 625.9       | 581.6       | 671.5       | 785.2   | 595.3   | 792.1   | 705.2    | 862.2    | 814.5    | 818.0    | 579.9         | 792.1      | 1.4         |
| 218238_at    | GTPBP4         | 4.38E-03 | 1003.3     | 882.8      | 1111.4     | 955.2       | 1047.2      | 963.7       | 1104.0      | 1220.1  | 1308.5  | 1666.3  | 1462.0   | 1154.6   | 1239.2   | 1381.6   | 1003.3        | 1308.5     | 1.3         |
| 218239_s_at  | GTPBP4         | 8.28E-03 | 748.1      | 895.4      | 1303.4     | 1109.6      | 1134.4      | 1155.7      | 1339.5      | 991.5   | 1237.7  | 2046.4  | 1736.1   | 1169.1   | 1377.0   | 1631.2   | 1134.4        | 1377.0     | 1.2         |
| 220577_at    | GVIN1          | 2.94E-03 | 82.9       | 71.8       | 88.0       | 114.7       | 91.3        | 107.1       | 105.8       | 118.5   | 108.6   | 243.6   | 248.2    | 122.0    | 148.8    | 146.7    | 91.3          | 146.7      | 1.6         |
| 205488_at    | GZMA           | 4.31E-03 | 37.4       | 42.4       | 46.1       | 54.1        | 89.0        | 96.5        | 62.7        | 111.0   | 58.5    | 78.2    | 197.8    | 104.9    | 150.1    | 116.1    | 54.1          | 111.0      | 2.1         |
| 210164_at    | GZMB           | 6.93E-04 | 35.2       | 48.2       | 47.1       | 28.9        | 58.6        | 52.9        | 59.6        | 124.3   | 50.9    | 218.2   | 123.8    | 156.5    | 141.8    | 274.2    | 48.2          | 141.8      | 2.9         |
| 206666_at    | GZMK           | 3.61E-03 | 65.2       | 56.4       | 33.7       | 44.5        | 35.3        | 35.1        | 45.5        | 75.4    | 80.8    | 46.7    | 132.1    | 63.3     | 56.9     | 77.7     | 44.5          | 75.4       | 1.4         |
| 209069_s_at  | H3F3B          | 1.49E-03 | 3423.7     | 2897.8     | 2839.6     | 3181.8      | 3350.1      | 2729.2      | 3425.5      | 3894.0  | 4413.4  | 4495.8  | 3989.9   | 5333.0   | 4879.2   | 5290.0   | 3181.8        | 4495.8     | 1.7         |
| 211997_x_at  | H3F3B          | 3.64E-03 | 2882.3     | 2216.1     | 2085.8     | 2697.8      | 2560.8      | 2161.2      | 2530.3      | 3019.7  | 3515.3  | 3638.9  | 3077.0   | 4484.2   | 4236.9   | 4670.8   | 2530.3        | 3638.9     | 1.4         |
| 220491_at    | HAMP           | 1.41E-03 | 165.3      | 169.7      | 146.5      | 100.0       | 119.8       | 101.0       | 135.4       | 400.9   | 208.5   | 244.5   | 171.0    | 503.0    | 297.2    | 459.5    | 135.4         | 297.2      | 2.2         |
| 227262_at    | HAPLN3         | 2.22E-04 | 57.8       | 64.1       | 68.2       | 69.6        | 77.8        | 57.0        | 86.2        | 118.4   | 94.6    | 168.1   | 144.1    | 109.4    | 115.1    | 152.9    | 68.2          | 118.4      | 1.7         |
| 1554285_at   | HAVCR2         | 2.99E-03 | 923.7      | 1112.8     | 879.5      | 812.4       | 804.5       | 733.2       | 843.3       | 969.9   | 1430.3  | 1364.8  | 1143.8   | 1142.8   | 1268.2   | 1370.5   | 843.3         | 1268.2     | 1.5         |
| 1555628_a_at | HAVCR2         | 4.74E-03 | 3115.8     | 3497.2     | 2325.9     | 2432.5      | 2761.8      | 2349.4      | 2535.9      | 3279.6  | 4432.5  | 3771.6  | 3228.5   | 3617.0   | 3993.8   | 4621.5   | 2535.9        | 3771.6     | 1.5         |
| 1555629_at   | HAVCR2         | 6.05E-03 | 59.0       | 51.4       | 66.8       | 55.8        | 70.1        | 45.8        | 66.9        | 65.7    | 68.0    | 102.4   | 90.5     | 74.7     | 68.2     | 93.5     | 59.0          | 74.7       | 1.3         |
| 214414_x_at  | HBA1 /// HBA2  | 9.19E-03 | 308.3      | 63.2       | 57.2       | 74.3        | 74.8        | 47.9        | 164.5       | 105.7   | 1081.0  | 2476.0  | 229.1    | 1950.6   | 256.4    | 2675.0   | 74.3          | 1081.0     | 14.6        |
| 244322_at    | hCG_2038586    | 5.78E-04 | 42.1       | 39.3       | 45.5       | 38.6        | 37.3        | 42.5        | 44.2        | 70.6    | 88.5    | 265.8   | 112.8    | 112.6    | 69.7     | 120.5    | 42.1          | 112.6      | 2.7         |
| 208018_s_at  | HCK            | 3.42E-03 | 4362.5     | 2733.2     | 3131.0     | 4402.2      | 4278.4      | 3357.3      | 4782.7      | 4792.4  | 4655.1  | 5073.5  | 5461.7   | 7114.8   | 7102.9   | 6393.6   | 4278.4        | 5461.7     | 1.3         |
| 211722_s_at  | HDAC6          | 7.17E-04 | 62.8       | 39.4       | 51.3       | 50.0        | 59.8        | 49.1        | 67.8        | 69.4    | 69.4    | 97.5    | 81.6     | 105.4    | 77.5     | 134.8    | 51.3          | 81.6       | 1.6         |
| 216484_x_at  | HDGF           | 9.94E-03 | 146.3      | 105.0      | 127.6      | 155.3       | 160.5       | 124.7       | 158.9       | 164.8   | 149.0   | 220.5   | 186.5    | 175.4    | 173.8    | 203.9    | 146.3         | 175.4      | 1.2         |
| 230582_at    | HECA           | 1.49E-03 | 75.4       | 74.4       | 92.8       | 104.7       | 86.1        | 93.3        | 78.7        | 98.6    | 95.9    | 131.7   | 135.2    | 110.1    | 123.6    | 117.5    | 86.1          | 117.5      | 1.4         |
| 212822_at    | HEG1           | 2.46E-03 | 372.6      | 249.6      | 190.5      | 289.5       | 175.1       | 193.5       | 250.5       | 371.8   | 425.8   | 539.8   | 432.1    | 361.8    | 506.8    | 650.7    | 249.6         | 432.1      | 1.7         |
| 213069_at    | HEG1           | 1.06E-03 | 796.3      | 678.7      | 568.6      | 838.2       | 492.6       | 526.0       | 709.1       | 928.8   | 1379.6  | 1625.1  | 1204.5   | 943.0    | 1088.8   | 1770.4   | 678.7         | 1204.5     | 1.8         |
| 1552787_at   | HELB           | 3.61E-03 | 57.0       | 82.2       | 77.2       | 108.8       | 107.2       | 75.4        | 28.6        | 68.9    | 107.1   | 149.0   | 184.1    | 150.8    | 93.3     | 37.1     | 77.2          | 107.1      | 1.4         |
| 1552788_a_at | HELB           | 3.73E-03 | 48.6       | 58.1       | 75.9       | 74.4        | 89.2        | 62.5        | 65.8        | 77.8    | 68.0    | 119.4   | 123.5    | 116.1    | 82.8     | 75.0     | 65.8          | 82.8       | 1.3         |
| 219863_at    | HERC5          | 1.16E-05 | 999.0      | 941.2      | 978.9      | 797.1       | 769.6       | 892.2       | 626.7       | 2395.9  | 3667.2  | 4231.0  | 2881.9   | 3039.4   | 2796.0   | 3780.7   | 892.2         | 3039.4     | 3.4         |
| 1563659_at   | HERC6          | 2.06E-04 | 66.7       | 66.1       | 76.8       | 65.6        | 49.1        | 49.6        | 62.7        | 90.2    | 112.2   | 179.1   | 134.3    | 79.2     | 86.9     | 116.8    | 66.7          | 112.2      | 1.7         |
| 219352_at    | HERC6          | 7.57E-06 | 357.3      | 444.9      | 357.6      | 330.5       | 275.4       | 291.9       | 245.2       | 1037.9  | 1358.9  | 1933.2  | 1357.2   | 1264.6   | 1183.9   | 1482.5   | 330.5         | 1357.2     | 4.1         |
| 203394_s_at  | HES1           | 3.59E-03 | 66.1       | 56.2       | 36.7       | 40.1        | 46.3        | 42.8        | 66.5        | 101.4   | 64.0    | 110.6   | 70.7     | 200.9    | 71.1     | 151.7    | 46.3          | 101.4      | 2.2         |
| 203395_s_at  | HES1           | 4.34E-03 | 83.7       | 67.3       | 68.4       | 80.9        | 82.7        | 67.9        | 106.5       | 94.9    | 100.4   | 151.5   | 92.5     | 165.8    | 103.5    | 252.0    | 80.9          | 103.5      | 1.3         |
| 211267_at    | HESX1          | 6.17E-06 | 71.9       | 45.1       | 75.9       | 49.2        | 42.1        | 33.5        | 37.0        | 240.8   | 360.2   | 632.9   | 326.0    | 326.9    | 250.6    | 406.1    | 45.1          | 326.9      | 7.3         |
| 218839_at    | HEY1           | 3.31E-04 | 110.7      | 60.7       | 61.6       | 87.0        | 187.7       | 78.6        | 196.4       | 196.9   | 429.0   | 668.7   | 374.1    | 609.0    | 722.6    | 607.3    | 87.0          | 607.3      | 7.0         |
| 44783_s_at   | HEY1           | 3.55E-04 | 162.8      | 152.4      | 110.9      | 131.7       | 379.8       | 125.8       | 373.1       | 357.3   | 868.7   | 1385.8  | 667.6    | 880.2    | 1249.7   | 1291.1   | 152.4         | 880.2      | 5.8         |
| 225222_at    | HIAT1          | 7.24E-04 | 497.8      | 524.7      | 559.7      | 497.9       | 668.0       | 574.2       | 695.3       | 814.1   | 929.0   | 1319.7  | 925.7    | 904.9    | 757.9    | 1078.0   | 559.7         | 925.7      | 1.7         |
| 200989_at    | HIF1A          | 6.81E-05 | 814.2      | 724.6      | 956.6      | 845.5       | 1471.5      | 908.1       | 1509.6      | 1600.4  | 2346.5  | 3570.1  | 2403.7   | 2583.5   | 2177.4   | 3541.4   | 908.1         | 2403.7     | 2.6         |
| 218279_s_at  | HIST2H2AA3     | 1.14E-03 | 401.8      | 235.0      | 568.5      | 459.8       | 369.8       | 555.9       | 433.0       | 585.0   | 581.7   | 844.3   | 602.1    | 884.9    | 867.3    | 1006.3   | 433.0         | 844.3      | 1.9         |
| 214290_s_at  | HIST2H2AA3     | 3.46E-03 | 628.2      | 603.5      | 1046.0     | 814.5       | 596.3       | 952.6       | 782.0       | 964.0   | 1048.0  | 1182.8  | 1007.5   | 1559.1   | 1556.7   | 1749.1   | 782.0         | 1182.8     | 1.5         |
| 218280_x_at  | /// HIST2H2AA4 | 5.58E-04 | 505.7      | 451.4      | 859.9      | 663.9       | 574.7       | 823.8       | 632.0       | 831.0   | 868.7   | 1198.5  | 914.0    | 1341.7   | 1307.5   | 1430.6   | 632.0         | 1198.5     | 1.9         |
| 204512_at    | HIVEP1         | 9.51E-04 | 242.2      | 166.4      | 258.3      | 236.8       | 408.4       | 263.9       | 448.0       | 393.7   | 425.4   | 777.5   | 503.2    | 503.6    | 569.7    | 689.4    | 258.3         | 503.6      | 1.9         |
| 212641_at    | HIVEP2         | 4.38E-04 | 75.5       | 41.5       | 101.7      | 75.6        | 161.8       | 61.8        | 127.2       | 143.2   | 156.6   | 285.5   | 158.0    | 219.8    | 212.7    | 268.5    | 75.6          | 212.7      | 2.8         |
| 212642_s_at  | HIVEP2         | 1.75E-03 | 154.6      | 103.6      | 169.1      | 133.8       | 290.7       | 144.8       | 300.5       | 250.2   | 282.8   | 545.6   | 288.0    | 326.0    | 455.5    | 483.1    | 154.6         | 326.0      | 2.1         |
| 243254_at    | HIVEP2         | 1.61E-04 | 86.8       | 96.7       | 100.6      | 90.9        | 198.9       | 83.2        | 169.7       | 190.0   | 239.7   | 429.7   | 206.1    | 344.7    | 316.3    | 359.2    | 96.7          | 316.3      | 3.3         |
| 232581_x_at  | HIVEP3         | 5.01E-03 | 99.5       | 69.8       | 81.5       | 98.7        | 85.7        | 55.6        | 97.0        | 117.3   | 104.0   | 134.8   | 121.1    | 120.5    | 141.4    | 142.4    | 85.7          | 121.1      | 1.4         |
| 235122_at    | HIVEP3         | 1.71E-03 | 52.8       | 45.8       | 45.7       | 84.8        | 87.3        | 44.0        | 90.8        | 117.0   | 53.7    | 218.2   | 222.7    | 136.9    | 165.9    | 220.6    | 52.8          | 1          |             |

Supplementary Table S1. *Continued.*

| ID           | Gene Symbol | p-value  | VW3_Saline | VW6_Saline | VW7_Saline | VW13_Saline | VW22_Saline | VW23_Saline | VW25_Saline | VW3_LPS | VW6_LPS | VW7_LPS | VW13_LPS | VW22_LPS | VW23_LPS | VW25_LPS | Median_saline | Median_LPS | Fold change |
|--------------|-------------|----------|------------|------------|------------|-------------|-------------|-------------|-------------|---------|---------|---------|----------|----------|----------|----------|---------------|------------|-------------|
| 205822_s_at  | HMGCS1      | 9.75E-04 | 117.5      | 100.3      | 98.9       | 92.6        | 153.9       | 94.9        | 137.3       | 187.9   | 136.9   | 182.6   | 150.8    | 179.7    | 153.7    | 196.1    | 100.3         | 179.7      | 1.8         |
| 1554303_at   | HNMT        | 7.28E-04 | 191.0      | 179.3      | 185.9      | 149.2       | 232.9       | 197.9       | 222.7       | 244.1   | 345.5   | 427.7   | 414.7    | 333.0    | 402.0    | 385.2    | 191.0         | 385.2      | 2.0         |
| 211732_x_at  | HNMT        | 2.93E-03 | 2356.4     | 2268.5     | 2118.3     | 1916.4      | 2374.6      | 2000.5      | 2115.3      | 2794.5  | 2659.3  | 2961.9  | 2636.6   | 3104.2   | 2992.4   | 2778.1   | 2118.3        | 2794.5     | 1.3         |
| 200751_s_at  | HNRNPC      | 1.05E-03 | 1156.0     | 988.0      | 1334.0     | 1415.0      | 1429.6      | 1218.8      | 1385.5      | 1531.8  | 1513.6  | 2356.2  | 1865.5   | 1846.4   | 1771.5   | 1905.3   | 1334.0        | 1846.4     | 1.4         |
| 211597_s_at  | HOPX        | 5.96E-04 | 24.5       | 20.4       | 15.5       | 21.7        | 35.1        | 24.5        | 14.7        | 53.7    | 74.9    | 257.2   | 82.3     | 92.1     | 91.5     | 58.2     | 21.7          | 82.3       | 3.8         |
| 204934_s_at  | HPN         | 2.38E-03 | 63.1       | 79.2       | 66.8       | 72.3        | 77.0        | 64.7        | 72.1        | 77.5    | 96.9    | 104.6   | 94.4     | 100.8    | 93.8     | 126.5    | 72.1          | 96.9       | 1.3         |
| 219403_s_at  | HPSE        | 1.96E-03 | 153.4      | 105.4      | 203.3      | 117.8       | 122.8       | 220.9       | 194.7       | 232.0   | 202.0   | 278.4   | 153.7    | 184.5    | 252.7    | 300.6    | 153.4         | 232.0      | 1.5         |
| 205579_at    | HRH1        | 4.84E-04 | 123.6      | 103.5      | 114.3      | 134.4       | 181.6       | 134.1       | 223.7       | 198.0   | 278.7   | 337.8   | 289.6    | 261.2    | 342.3    | 346.9    | 134.1         | 289.6      | 2.2         |
| 205580_s_at  | HRH1        | 2.86E-04 | 58.9       | 43.4       | 52.8       | 60.9        | 81.7        | 55.5        | 98.4        | 120.8   | 77.1    | 120.9   | 138.5    | 111.3    | 154.9    | 158.4    | 58.9          | 120.9      | 2.1         |
| 1561908_a_at | HS3ST3B1    | 7.57E-06 | 202.8      | 113.0      | 124.6      | 73.8        | 260.7       | 100.9       | 207.5       | 1037.0  | 1037.2  | 2449.5  | 1004.1   | 1494.6   | 911.7    | 2355.8   | 124.6         | 1037.2     | 8.3         |
| 221062_at    | HS3ST3B1    | 8.37E-06 | 43.4       | 27.3       | 42.1       | 18.7        | 81.3        | 26.6        | 78.2        | 299.1   | 260.1   | 1088.5  | 364.6    | 495.8    | 349.1    | 865.6    | 42.1          | 364.6      | 8.7         |
| 227361_at    | HS3ST3B1    | 9.18E-05 | 79.5       | 10.5       | 110.3      | 51.7        | 262.4       | 31.9        | 253.3       | 830.2   | 1234.5  | 3258.0  | 1249.2   | 1375.3   | 999.8    | 2236.7   | 79.5          | 1249.2     | 15.7        |
| 205404_at    | HSD11B1     | 2.64E-04 | 118.8      | 84.3       | 148.4      | 64.0        | 111.9       | 120.8       | 187.1       | 326.4   | 147.6   | 349.4   | 179.4    | 200.0    | 373.5    | 268.1    | 118.8         | 268.1      | 2.3         |
| 1552623_at   | HSH2D       | 2.39E-03 | 57.0       | 33.8       | 33.5       | 45.5        | 24.4        | 33.4        | 22.9        | 63.2    | 62.1    | 146.7   | 92.1     | 125.3    | 94.0     | 146.6    | 33.5          | 94.0       | 2.8         |
| 202557_at    | HSPA13      | 5.29E-03 | 699.9      | 777.4      | 779.2      | 875.3       | 958.6       | 836.5       | 1133.3      | 919.1   | 1201.7  | 1672.9  | 1395.9   | 1134.4   | 1058.3   | 1376.4   | 836.5         | 1201.7     | 1.4         |
| 202558_s_at  | HSPA13      | 6.85E-03 | 53.4       | 53.5       | 118.8      | 108.1       | 134.1       | 110.4       | 154.6       | 104.6   | 112.3   | 286.0   | 157.8    | 144.0    | 146.9    | 181.9    | 110.4         | 146.9      | 1.3         |
| 211538_s_at  | HSPA2       | 3.32E-03 | 72.0       | 96.7       | 96.1       | 92.1        | 151.7       | 106.4       | 84.7        | 146.4   | 144.7   | 169.5   | 115.8    | 161.2    | 189.8    | 120.7    | 96.1          | 146.4      | 1.5         |
| 204883_s_at  | HUS1        | 5.98E-03 | 417.0      | 469.6      | 510.4      | 512.4       | 500.7       | 484.2       | 461.6       | 551.5   | 642.3   | 773.0   | 628.5    | 557.7    | 646.4    | 533.9    | 484.2         | 628.5      | 1.3         |
| 207370_at    | IBSP        | 2.64E-03 | 111.4      | 111.9      | 115.7      | 91.2        | 97.3        | 101.7       | 104.7       | 134.2   | 163.1   | 192.4   | 122.6    | 120.8    | 199.4    | 220.7    | 104.7         | 163.1      | 1.6         |
| 236028_at    | IBSP        | 1.66E-03 | 26.2       | 56.3       | 13.8       | 10.7        | 13.3        | 19.5        | 21.1        | 40.7    | 93.4    | 115.9   | 23.2     | 36.3     | 97.3     | 74.0     | 19.5          | 74.0       | 3.8         |
| 202637_s_at  | ICAM1       | 7.00E-04 | 1356.1     | 370.9      | 882.2      | 1131.5      | 2008.2      | 495.6       | 2042.9      | 2908.7  | 2543.1  | 3438.6  | 2962.5   | 3750.5   | 3215.8   | 4072.5   | 1131.5        | 3215.8     | 2.8         |
| 202638_s_at  | ICAM1       | 1.45E-03 | 722.4      | 134.7      | 499.9      | 554.3       | 1106.3      | 261.5       | 1140.5      | 1465.3  | 1304.4  | 2170.1  | 1693.8   | 1868.6   | 1746.5   | 2202.8   | 554.3         | 1746.5     | 3.2         |
| 215485_s_at  | ICAM1       | 8.20E-04 | 414.1      | 96.9       | 320.7      | 372.3       | 567.8       | 159.6       | 653.5       | 817.9   | 629.7   | 1081.2  | 852.5    | 1454.4   | 1330.3   | 1317.5   | 372.3         | 1081.2     | 2.9         |
| 204949_at    | ICAM3       | 6.11E-03 | 188.3      | 124.4      | 312.5      | 361.3       | 283.8       | 513.8       | 434.9       | 279.8   | 348.7   | 485.2   | 367.0    | 580.6    | 682.5    | 706.8    | 312.5         | 485.2      | 1.6         |
| 211197_s_at  | ICOSLG      | 1.31E-04 | 77.8       | 50.6       | 87.8       | 92.4        | 84.4        | 74.4        | 108.4       | 140.5   | 75.3    | 188.1   | 143.8    | 179.9    | 140.5    | 170.1    | 84.4          | 143.8      | 1.7         |
| 211198_s_at  | ICOSLG      | 8.26E-03 | 38.6       | 42.0       | 51.6       | 50.0        | 53.0        | 43.7        | 64.2        | 57.7    | 44.1    | 61.7    | 61.0     | 69.8     | 58.2     | 83.7     | 50.0          | 61.0       | 1.2         |
| 211199_s_at  | ICOSLG      | 2.64E-03 | 46.6       | 46.4       | 54.9       | 62.4        | 57.9        | 57.5        | 46.1        | 55.2    | 53.2    | 102.8   | 87.7     | 93.8     | 84.9     | 82.4     | 54.9          | 84.9       | 1.5         |
| 213450_s_at  | ICOSLG      | 1.28E-04 | 92.0       | 65.4       | 105.3      | 135.9       | 132.9       | 82.3        | 131.1       | 158.4   | 112.4   | 260.8   | 207.9    | 271.3    | 176.9    | 211.6    | 105.3         | 207.9      | 2.0         |
| 228976_at    | ICOSLG      | 2.58E-03 | 113.2      | 47.9       | 121.8      | 112.7       | 113.7       | 108.6       | 131.8       | 207.5   | 57.9    | 170.1   | 136.6    | 175.5    | 193.8    | 171.6    | 113.2         | 171.6      | 1.5         |
| 210029_at    | IDO1        | 2.42E-06 | 64.6       | 41.5       | 97.4       | 58.5        | 77.2        | 48.0        | 64.0        | 1628.9  | 1878.9  | 3282.6  | 1646.7   | 1625.8   | 567.9    | 2786.1   | 64.0          | 1646.7     | 25.7        |
| 201631_s_at  | IER3        | 7.51E-04 | 2922.2     | 2791.1     | 853.0      | 2409.3      | 5912.9      | 2956.2      | 5548.2      | 7390.5  | 12809.0 | 11356.3 | 8923.4   | 11377.4  | 10485.3  | 14057.0  | 2922.2        | 11356.3    | 3.9         |
| 208965_s_at  | IFI16       | 3.93E-03 | 3209.7     | 2950.5     | 2865.8     | 3360.2      | 3080.5      | 2589.7      | 3184.1      | 3552.8  | 3841.4  | 4206.2  | 4158.7   | 3868.2   | 4061.2   | 4564.4   | 3080.5        | 4061.2     | 1.3         |
| 208966_x_at  | IFI16       | 7.72E-03 | 2621.1     | 2425.9     | 2864.7     | 2913.1      | 2851.7      | 2643.0      | 2989.9      | 2911.7  | 3255.7  | 4063.6  | 3552.3   | 3218.0   | 3498.4   | 3817.9   | 2851.7        | 3498.4     | 1.2         |
| 209417_s_at  | IFI35       | 9.69E-05 | 700.9      | 574.0      | 547.8      | 609.8       | 426.0       | 452.3       | 473.1       | 1197.8  | 1422.7  | 1738.1  | 1243.2   | 1734.1   | 1655.0   | 1819.4   | 547.8         | 1655.0     | 3.0         |
| 214059_at    | IFI44       | 2.02E-04 | 418.6      | 557.1      | 507.2      | 475.0       | 287.3       | 341.1       | 222.2       | 626.3   | 960.6   | 1427.9  | 1025.7   | 659.0    | 793.5    | 777.9    | 418.6         | 793.5      | 1.9         |
| 214445_s_at  | IFI44       | 2.75E-05 | 2790.3     | 3636.9     | 3513.6     | 2911.5      | 2495.2      | 2547.5      | 2611.8      | 4768.8  | 7109.4  | 9052.6  | 6391.0   | 5644.7   | 5844.5   | 7520.8   | 2790.3        | 6391.0     | 2.3         |
| 204439_at    | IFI44L      | 2.12E-05 | 402.6      | 807.9      | 800.1      | 607.1       | 455.9       | 485.1       | 307.3       | 1038.1  | 1887.5  | 2587.4  | 1846.8   | 1127.0   | 1420.4   | 1522.7   | 485.1         | 1522.7     | 3.1         |
| 1555464_at   | IFIH1       | 4.32E-05 | 38.7       | 50.5       | 49.7       | 40.6        | 44.7        | 39.8        | 44.3        | 88.6    | 142.9   | 312.9   | 150.6    | 124.5    | 113.9    | 195.8    | 44.3          | 142.9      | 3.2         |
| 216020_at    | IFIH1       | 1.15E-05 | 82.9       | 70.8       | 135.0      | 88.8        | 159.7       | 75.6        | 101.1       | 249.0   | 277.2   | 660.6   | 396.1    | 352.4    | 315.4    | 495.8    | 88.8          | 352.4      | 4.0         |
| 219209_at    | IFIH1       | 1.16E-05 | 524.8      | 461.0      | 580.6      | 538.0       | 597.6       | 361.3       | 655.7       | 1373.4  | 2129.5  | 3593.9  | 1893.2   | 1780.6   | 1757.3   | 2803.8   | 538.0         | 1893.2     | 3.5         |
| 203153_at    | IFIT1       | 3.07E-05 | 2198.6     | 2156.1     | 1559.7     | 1398.7      | 941.8       | 1148.5      | 1000.1      | 4516.4  | 7533.1  | 7847.2  | 5645.5   | 4977.1   | 5460.4   | 7123.0   | 1398.7        | 5645.5     | 4.0         |
| 217502_at    | IFIT2       | 1.25E-05 | 1369.0     | 1304.1     | 1211.5     | 866.8       | 937.4       | 925.6       | 801.4       | 3506.7  | 5614.9  | 7708.7  | 3576.6   | 4706.2   | 3942.9   | 6048.8   | 937.4         | 4706.2     | 5.0         |
| 226757_at    | IFIT2       | 2.25E-05 | 3586.9     | 3567.8     | 3652.4     | 2912.0      | 2570.5      | 3069.1      | 2867.1      | 6155.7  | 10215.1 | 11530.2 | 7938.1   | 8247.6   | 7892.9   | 9788.1   | 3069.1        | 8247.6     | 2.7         |
| 204747_at    | IFIT3       | 3.49E-05 | 1690.1     | 1531.0     | 1438.5     | 1293.3      | 1173.2      | 995.2       | 1051.4      | 3248.8  | 4943.0  | 6631.3  | 3655.6   | 4748.2   | 4262.1   | 5534.6   | 1293.3        | 4748.2     | 3.7         |
| 229450_at    | IFIT3       | 2.62E-05 | 1251.6     | 1245.3     | 1346.8     | 1208.4      | 936.7       | 934.7       | 1073.2      | 2263.6  | 3880.9  | 5270.2  | 3043.6   | 2838.6   | 2744.7   | 4080.2   | 1208.4        | 3043.6     | 2.5         |
| 203595_s_at  | IFIT5       | 5.75E-04 | 249.9      | 219.0      | 383.7      | 438.1       | 344.4       | 306.9       | 409.6       | 441.8   | 604.8   | 1081.9  | 689.2    | 494.4    | 503.1    | 782.1    | 344.4         | 604.8      | 1.8         |
| 203596_s_at  | IFIT5       | 2.15E-04 | 366.9      | 478.3      | 562.6      | 571.0       | 496.5       | 464.1       | 497.2       | 530.9   | 746.7   | 998.1   | 807.7    | 786.0    | 682.5    | 922.7    | 496.5         | 786.0      | 1.6         |
| 201601_x_at  | IFITM1      | 1.96E-04 | 223.5      | 184.5      | 203.0      | 173.5       | 123.1       | 88.2        | 97.2        | 426.2   | 603.5   | 760.9   | 551.2    | 651.7    | 678.8    | 943.0    | 173.5         | 651.7      | 3.8         |
| 214022_s_at  | IFITM1      | 1.96E-06 | 27.8       | 18.1       | 30.4       | 34.7        | 26.8        | 30.8        | 29.0        | 172.9   | 161.9   | 375.7   | 293.7    | 205.9    | 241.9    | 344.6    | 29.0          | 251.9      | 8.7         |
| 201315_x_at  | IFITM2      | 1.34E-03 | 716.2      | 302.0      | 650.7      | 847.0       | 546.6       | 212.9       | 263.9       | 983.8   | 1132.6  | 1743.6  | 1321.2   | 2056.1   | 1348.3   | 1727.0   | 546.6         | 1348.3     | 2.5         |
| 212203_x_at  | IFITM3      | 1.09E-03 | 2783.6     | 1837.4     | 3069.8     | 2842.1      | 1229.1      | 851.3       | 986.9       | 4534.5  | 4488.4  | 6242.1  | 4994.2   | 5704.3   | 4804.5   | 5778.1   | 1837.4        | 4994.2     | 2.7         |
| 201642_at    | IFNGR2      | 5.91E-05 | 1432.0     | 1078.1     | 1315.8     | 1289.7      | 2129.2      | 1390.2      | 1894.2      | 3257.3  | 2446.3  | 3078.5  | 3337.5   | 3550.0   | 3188.0   | 2979.0   | 1390.2        | 3188.0     | 2.3         |
| 218100_s_at  | IFT57       | 1.46E-03 | 545.0      | 515.1      | 585.1      | 524.6       | 621.1       | 684.9       | 569.0       | 706.9   | 664.9   | 810.5   | 765.9    | 757.2    | 1053.9   | 766.1    | 569.0         | 765.9      | 1.3         |
| 203819_s_at  | IGF2BP3     | 3.41E-05 | 138.1      | 116.2      | 171.8      | 171.1       | 132.0       | 108.1       | 142.7       | 381.6   | 726.8   | 1128.5  | 540.8    | 431.2    | 304.4    | 753.5    | 138.1         | 540.8      | 3.9         |
| 203820_s_at  | IGF2BP3     | 3.55E-05 | 75.0       | 82.1       | 147.3      | 111.2       | 99.5        | 105.7       | 123.0       | 256.2   | 589.6   | 1245.1  | 463.1    | 355.8    | 273.5    | 578.5    | 105.7         | 463.1      | 4.4         |
| 216493_s_at  | IGF2BP3     | 8.16E-05 | 45.7       | 63.4       | 50.3       | 38.1        | 55.7        | 44.6        | 39.8        | 112.4   | 161.9   | 294.0   | 175.6    | 127.5    | 121.0    | 191.8    | 45.7          | 161.9      | 3.5         |
| 201508_at    | IGFBP4      | 1.10E-03 | 99.0       | 65.8       | 71.7       | 89.0        | 75.0        | 46.6        | 70.4        | 114.9   | 316.4   | 488.2   | 193.1    | 200.1    | 152.1    | 371.2    | 71.7          | 200.1      | 2.8         |
| 206420_at    | IGSF6       | 4.68E-03 | 3552.4     | 2410.9     | 4079.2     | 4632.2      | 4776.7      | 4129.6      | 5114.5      | 4784.1  | 5001.0  | 7503.6  | 5702.0   | 5466.7   |          |          |               |            |             |

TRANSCRIPTION PROFILES IN ALVEOLAR MACROPHAGES

Supplementary Table S1. Continued.

| ID           | Gene Symbol | p-value  | VW3_Saline | VW6_Saline | VW7_Saline | VW13_Saline | VW22_Saline | VW23_Saline | VW25_Saline | VW3_LPS | VW6_LPS | VW7_LPS | VW13_LPS | VW22_LPS | VW23_LPS | VW25_LPS | Median_saline | Median_LPS | Fold change |
|--------------|-------------|----------|------------|------------|------------|-------------|-------------|-------------|-------------|---------|---------|---------|----------|----------|----------|----------|---------------|------------|-------------|
| 207375_s_at  | IL15RA      | 2.42E-06 | 169.2      | 172.0      | 189.7      | 185.1       | 203.0       | 112.9       | 193.7       | 989.0   | 1708.1  | 2071.8  | 1224.3   | 1659.7   | 1384.7   | 2150.8   | 185.1         | 1659.7     | 9.0         |
| 206295_at    | IL18        | 4.41E-03 | 212.9      | 157.8      | 319.9      | 276.1       | 461.6       | 366.5       | 498.0       | 478.8   | 326.8   | 927.6   | 717.7    | 624.4    | 526.8    | 499.0    | 319.9         | 526.8      | 1.6         |
| 206618_at    | IL18R1      | 1.08E-03 | 37.2       | 32.9       | 25.6       | 29.0        | 36.2        | 23.4        | 25.3        | 48.0    | 46.4    | 87.1    | 81.0     | 63.8     | 62.9     | 63.4     | 29.0          | 63.4       | 2.2         |
| 207072_at    | IL18RAP     | 5.16E-04 | 50.4       | 46.2       | 74.9       | 63.9        | 64.1        | 51.7        | 67.3        | 56.9    | 82.2    | 175.3   | 144.7    | 120.7    | 104.0    | 168.2    | 63.9          | 120.7      | 1.9         |
| 210118_s_at  | IL1A        | 1.53E-04 | 1104.3     | 665.5      | 1203.0     | 827.6       | 2074.1      | 773.6       | 2129.8      | 2112.2  | 4212.1  | 7390.9  | 3625.7   | 5376.9   | 5657.2   | 6435.7   | 1104.3        | 5376.9     | 4.9         |
| 205067_at    | IL1B        | 4.19E-05 | 1717.9     | 642.0      | 1117.0     | 937.5       | 2345.7      | 792.0       | 2762.5      | 5305.2  | 9601.2  | 12648.2 | 7875.8   | 11269.1  | 10828.5  | 13971.2  | 1117.0        | 10828.5    | 9.7         |
| 39402_at     | IL1B        | 4.26E-05 | 2119.5     | 924.4      | 1356.7     | 1251.8      | 2893.5      | 1108.9      | 3139.6      | 5951.9  | 10499.8 | 13592.3 | 8443.0   | 11972.3  | 11802.5  | 14091.6  | 1356.7        | 11802.5    | 8.7         |
| 220322_at    | IL1F9       | 1.66E-04 | 32.1       | 41.4       | 29.7       | 26.0        | 31.6        | 34.3        | 29.8        | 66.6    | 81.3    | 95.7    | 47.1     | 153.1    | 108.1    | 106.2    | 31.6          | 95.7       | 3.0         |
| 202948_at    | IL1R1       | 1.58E-03 | 46.6       | 54.7       | 59.3       | 75.4        | 79.6        | 59.9        | 61.6        | 81.2    | 70.5    | 155.9   | 97.4     | 116.4    | 109.3    | 111.4    | 59.9          | 109.3      | 1.8         |
| 205403_at    | IL1R2       | 1.85E-04 | 67.3       | 61.1       | 37.8       | 34.5        | 59.5        | 36.3        | 44.2        | 136.3   | 282.4   | 475.2   | 122.0    | 213.9    | 237.2    | 392.0    | 44.2          | 237.2      | 5.4         |
| 211372_s_at  | IL1R2       | 1.99E-03 | 68.4       | 78.8       | 38.6       | 40.0        | 37.3        | 49.2        | 56.8        | 81.9    | 198.4   | 315.4   | 70.1     | 128.0    | 148.1    | 228.0    | 49.2          | 148.1      | 3.0         |
| 210233_at    | IL1RAP      | 2.18E-03 | 82.2       | 51.8       | 71.8       | 90.0        | 74.5        | 78.6        | 92.1        | 166.2   | 91.0    | 260.6   | 135.4    | 135.4    | 126.9    | 116.3    | 78.6          | 135.4      | 1.7         |
| 212657_s_at  | IL1RN       | 6.14E-05 | 4945.7     | 2439.0     | 3003.5     | 4183.1      | 6036.7      | 3536.8      | 5883.1      | 11305.9 | 15009.4 | 15981.3 | 13110.7  | 15185.1  | 14638.7  | 16591.4  | 4183.1        | 15009.4    | 3.6         |
| 212659_s_at  | IL1RN       | 8.61E-06 | 497.4      | 144.5      | 273.4      | 352.4       | 483.1       | 234.4       | 558.1       | 2672.0  | 2770.1  | 3487.4  | 2398.9   | 4985.8   | 4568.4   | 4258.0   | 352.4         | 3487.4     | 9.9         |
| 216243_s_at  | IL1RN       | 1.52E-05 | 1065.7     | 263.7      | 542.2      | 793.1       | 971.6       | 442.3       | 1139.3      | 5192.7  | 5776.0  | 6641.0  | 4714.1   | 9071.6   | 8411.1   | 8701.3   | 793.1         | 6641.0     | 8.4         |
| 216244_at    | IL1RN       | 1.55E-05 | 41.1       | 23.6       | 14.6       | 35.5        | 14.8        | 15.7        | 28.9        | 129.1   | 94.1    | 99.3    | 182.3    | 74.0     | 114.3    | 316.6    | 23.6          | 114.3      | 4.8         |
| 216245_at    | IL1RN       | 1.43E-05 | 173.5      | 47.5       | 83.7       | 126.3       | 160.8       | 66.4        | 169.9       | 749.7   | 848.7   | 1093.3  | 792.0    | 1026.7   | 1061.2   | 1426.0   | 126.3         | 1026.7     | 8.1         |
| 220054_at    | IL23A       | 2.04E-03 | 81.4       | 64.0       | 84.3       | 94.5        | 85.5        | 77.4        | 92.9        | 118.6   | 1078.5  | 1181.4  | 172.5    | 341.1    | 317.6    | 897.5    | 84.3          | 341.1      | 4.0         |
| 1552995_at   | IL27        | 1.22E-03 | 43.1       | 35.7       | 49.0       | 40.3        | 43.0        | 40.3        | 56.9        | 47.4    | 48.6    | 87.4    | 68.6     | 89.3     | 80.8     | 100.8    | 43.0          | 80.8       | 1.9         |
| 206341_at    | IL2RA       | 7.99E-03 | 55.2       | 43.1       | 46.2       | 48.6        | 50.8        | 46.2        | 44.9        | 59.3    | 52.0    | 130.4   | 103.6    | 73.6     | 70.4     | 143.9    | 46.2          | 73.6       | 1.6         |
| 211269_s_at  | IL2RA       | 7.75E-03 | 53.9       | 82.2       | 43.8       | 31.6        | 39.7        | 27.8        | 36.4        | 55.7    | 85.8    | 85.4    | 77.9     | 65.6     | 56.9     | 115.3    | 39.7          | 77.9       | 2.0         |
| 205291_at    | IL2RB       | 7.20E-03 | 73.1       | 54.7       | 36.1       | 55.5        | 64.0        | 51.5        | 45.2        | 79.4    | 67.8    | 68.0    | 101.7    | 82.3     | 86.7     | 133.9    | 54.7          | 82.3       | 1.5         |
| 230966_at    | IL4I1       | 1.21E-05 | 63.4       | 32.7       | 71.0       | 70.6        | 85.1        | 51.1        | 73.2        | 132.3   | 112.2   | 226.7   | 182.7    | 249.9    | 209.3    | 200.1    | 70.6          | 200.1      | 2.8         |
| 205207_at    | IL6         | 4.90E-06 | 231.7      | 76.1       | 310.3      | 156.6       | 403.9       | 142.1       | 486.3       | 4279.8  | 9316.7  | 12716.8 | 6972.7   | 8322.5   | 7949.7   | 11178.5  | 231.7         | 8322.5     | 35.9        |
| 204864_s_at  | IL6ST       | 4.10E-03 | 223.9      | 204.1      | 304.5      | 269.3       | 381.2       | 267.1       | 349.1       | 370.3   | 327.6   | 456.3   | 340.1    | 446.1    | 347.8    | 403.2    | 269.3         | 370.3      | 1.4         |
| 211000_s_at  | IL6ST       | 5.49E-03 | 404.7      | 366.6      | 541.4      | 395.0       | 669.7       | 521.7       | 608.0       | 697.7   | 528.0   | 764.3   | 628.4    | 779.4    | 609.9    | 697.5    | 521.7         | 697.5      | 1.3         |
| 205798_at    | IL7R        | 2.16E-04 | 1645.6     | 830.3      | 550.9      | 1598.1      | 1324.4      | 560.8       | 1293.0      | 2985.3  | 3785.1  | 4017.9  | 3984.7   | 4064.5   | 3894.7   | 4664.3   | 1293.0        | 3984.7     | 3.1         |
| 226218_at    | IL7R        | 2.95E-04 | 2366.9     | 1768.5     | 906.3      | 2470.5      | 2157.2      | 1180.2      | 2684.4      | 4021.9  | 6428.9  | 5834.3  | 6071.7   | 5125.1   | 5875.3   | 7218.5   | 2157.2        | 5875.3     | 2.7         |
| 202859_x_at  | IL8         | 2.00E-03 | 1362.0     | 138.9      | 763.8      | 785.7       | 2878.2      | 473.2       | 2937.1      | 3169.8  | 5518.1  | 9575.4  | 6641.8   | 5766.4   | 6135.5   | 7498.5   | 785.7         | 6135.5     | 7.8         |
| 211506_s_at  | IL8         | 2.05E-04 | 767.8      | 83.0       | 339.8      | 381.4       | 1440.5      | 162.1       | 1148.8      | 3236.5  | 5187.4  | 9070.3  | 5714.1   | 7228.6   | 6293.4   | 7847.8   | 381.4         | 6293.4     | 16.5        |
| 229582_at    | INO80C      | 4.45E-03 | 485.4      | 342.8      | 393.3      | 435.6       | 511.5       | 357.0       | 521.4       | 561.7   | 507.8   | 608.8   | 499.4    | 775.4    | 609.4    | 624.4    | 435.6         | 608.8      | 1.4         |
| 220165_at    | INO80D      | 3.96E-03 | 161.2      | 155.7      | 225.2      | 206.5       | 228.7       | 206.3       | 218.8       | 212.7   | 198.9   | 288.3   | 232.1    | 297.8    | 270.8    | 280.3    | 206.5         | 270.8      | 1.3         |
| 202794_at    | INPP1       | 1.41E-03 | 314.3      | 248.7      | 316.3      | 299.0       | 350.7       | 259.3       | 312.1       | 423.6   | 327.5   | 535.2   | 397.2    | 458.3    | 365.8    | 404.0    | 312.1         | 404.0      | 1.3         |
| 201625_s_at  | INSIG1      | 7.22E-04 | 170.9      | 125.1      | 111.0      | 85.2        | 180.0       | 110.2       | 140.5       | 311.3   | 143.7   | 240.9   | 149.2    | 270.9    | 200.4    | 315.2    | 125.1         | 240.9      | 1.9         |
| 201627_s_at  | INSIG1      | 3.63E-03 | 250.2      | 248.2      | 160.6      | 154.6       | 281.1       | 178.0       | 243.0       | 372.9   | 293.1   | 445.2   | 200.3    | 426.5    | 283.9    | 486.9    | 243.0         | 372.9      | 1.5         |
| 219092_s_at  | IPPK        | 3.17E-03 | 533.2      | 463.3      | 503.7      | 442.5       | 544.3       | 449.9       | 466.8       | 614.8   | 631.6   | 749.2   | 807.2    | 636.6    | 639.1    | 706.5    | 463.3         | 639.1      | 1.4         |
| 1553740_a_at | IRAK2       | 4.92E-04 | 43.4       | 29.3       | 41.8       | 35.4        | 47.4        | 34.3        | 46.1        | 61.9    | 48.1    | 90.8    | 57.6     | 75.6     | 99.3     | 94.1     | 41.8          | 75.6       | 1.8         |
| 231779_at    | IRAK2       | 5.52E-05 | 301.5      | 200.0      | 241.7      | 220.4       | 610.7       | 191.3       | 567.5       | 987.3   | 1490.2  | 2887.0  | 1350.6   | 1668.5   | 1489.5   | 2392.0   | 241.7         | 1490.2     | 6.2         |
| 1568830_at   | IRAK3       | 1.49E-03 | 67.6       | 91.4       | 137.7      | 112.8       | 130.7       | 126.7       | 143.6       | 122.0   | 146.1   | 254.7   | 182.4    | 161.4    | 150.7    | 203.5    | 126.7         | 161.4      | 1.3         |
| 220034_at    | IRAK3       | 6.98E-05 | 578.3      | 570.6      | 634.5      | 617.8       | 759.1       | 679.9       | 715.6       | 999.9   | 1042.7  | 1326.2  | 988.3    | 1221.9   | 1076.2   | 1195.0   | 634.5         | 1076.2     | 1.7         |
| 202531_at    | IRF1        | 2.47E-04 | 342.1      | 274.1      | 377.0      | 342.4       | 420.5       | 295.8       | 364.0       | 456.4   | 486.9   | 938.0   | 614.7    | 708.9    | 640.5    | 853.4    | 342.4         | 640.5      | 1.9         |
| 238725_at    | IRF1        | 4.87E-05 | 155.7      | 195.3      | 209.6      | 240.6       | 356.1       | 196.1       | 205.4       | 366.0   | 332.0   | 621.3   | 652.3    | 630.8    | 449.1    | 457.3    | 205.4         | 457.3      | 2.2         |
| 204562_at    | IRF4        | 2.46E-03 | 44.1       | 49.2       | 39.1       | 49.7        | 37.6        | 41.6        | 36.4        | 62.0    | 95.7    | 52.9    | 76.6     | 59.9     | 55.3     | 103.8    | 41.6          | 62.0       | 1.5         |
| 208436_s_at  | IRF7        | 2.38E-04 | 291.6      | 194.7      | 201.7      | 204.2       | 194.3       | 137.8       | 182.4       | 449.8   | 477.7   | 775.3   | 462.5    | 846.7    | 744.8    | 746.6    | 194.7         | 744.8      | 3.8         |
| 240287_at    | IRG1        | 2.42E-06 | 40.5       | 26.7       | 55.4       | 35.2        | 176.2       | 34.3        | 73.0        | 731.9   | 1370.1  | 1828.5  | 1196.8   | 1894.9   | 1045.7   | 1883.1   | 40.5          | 1370.1     | 33.8        |
| 205483_s_at  | ISG15       | 8.70E-05 | 752.2      | 691.2      | 541.4      | 535.4       | 319.1       | 288.3       | 334.9       | 1729.3  | 2449.0  | 3159.5  | 2122.2   | 3051.6   | 2755.3   | 3149.6   | 535.4         | 2755.3     | 5.1         |
| 204698_at    | ISG20       | 2.65E-06 | 117.5      | 61.6       | 65.4       | 80.6        | 65.6        | 51.1        | 47.6        | 1227.5  | 2231.6  | 2627.7  | 1495.6   | 2176.9   | 2066.6   | 2367.8   | 65.4          | 2176.9     | 33.3        |
| 33304_at     | ISG20       | 5.84E-06 | 171.7      | 96.7       | 93.9       | 109.0       | 65.3        | 61.7        | 66.4        | 1385.0  | 2873.5  | 3196.0  | 1848.3   | 2570.0   | 2517.0   | 3078.0   | 93.9          | 2570.0     | 27.4        |
| 209744_x_at  | ITCH        | 6.61E-03 | 181.3      | 193.1      | 304.0      | 272.8       | 319.1       | 329.8       | 308.0       | 286.9   | 376.6   | 570.5   | 382.8    | 338.7    | 421.9    | 364.1    | 304.0         | 376.6      | 1.2         |
| 217094_s_at  | ITCH        | 1.22E-03 | 412.7      | 435.9      | 546.2      | 484.9       | 539.0       | 583.8       | 543.5       | 577.0   | 716.6   | 980.5   | 652.1    | 671.8    | 816.1    | 731.8    | 539.0         | 716.6      | 1.3         |
| 202351_at    | ITGAV       | 3.05E-03 | 741.7      | 707.8      | 807.8      | 897.6       | 1115.3      | 812.7       | 1294.7      | 1059.7  | 989.4   | 1462.4  | 1624.0   | 1293.0   | 1316.0   | 1488.9   | 812.7         | 1316.0     | 1.6         |
| 204627_s_at  | ITGB3       | 4.41E-04 | 39.6       | 35.3       | 22.8       | 14.7        | 17.5        | 19.7        | 35.9        | 95.2    | 63.1    | 169.1   | 37.1     | 56.1     | 45.2     | 170.8    | 22.8          | 63.1       | 2.8         |
| 205816_at    | ITGB8       | 2.37E-04 | 306.8      | 169.9      | 228.5      | 345.7       | 678.3       | 235.1       | 682.3       | 875.9   | 1108.6  | 1660.2  | 1203.1   | 1351.6   | 1273.7   | 1513.5   | 306.8         | 1273.7     | 4.2         |
| 211488_s_at  | ITGB8       | 3.20E-04 | 592.3      | 340.4      | 379.0      | 515.3       | 1024.0      | 352.3       | 1129.3      | 1391.9  | 1642.6  | 2481.4  | 1646.4   | 1858.2   | 1944.9   | 2457.5   | 515.3         | 1858.2     | 3.6         |
| 226189_at    | ITGB8       | 1.66E-03 | 96.6       | 49.9       | 115.7      | 136.5       | 293.4       | 111.4       | 387.0       | 269.8   | 369.7   | 826.9   | 526.0    | 395.2    | 425.7    | 600.7    | 115.7         | 425.7      | 3.7         |
| 242982_x_at  | ITGB8       | 8.54E-04 | 232.0      | 135.4      | 108.7      | 154.5       | 317.0       | 128.3       | 342.4       | 384.9   | 524.1   | 675.6   | 468.4    | 533.8    | 577.9    | 669.5    | 154.5         | 533.8      | 3.5         |
| 206287_s_at  | ITIH4       | 3.62E-03 | 446.6      | 858.9      | 748.4      | 952.9       | 448.9       | 755.0       | 432.8       | 770.2   | 1197.5  | 1311.3  | 1197.5   | 1416.2   | 1201.2   | 1567.3   | 748.4         | 1201.2     | 1.6         |
| 242720_at    | ITIH4       | 3.20E-04 | 70.5       | 68.6       | 88.3       | 91.5        | 73.8        | 86.9        | 96.3        | 113.5   | 103.0   | 225.8   | 131.9    | 156.8    | 149.8    | 199.4    | 88.3          | 149.8      | 1.7         |
| 37201_at     | ITIH4       | 9.12E-04 | 124.4      | 198.2      | 25         |             |             |             |             |         |         |         |          |          |          |          |               |            |             |

Supplementary Table S1. Continued.

| ID           | Gene Symbol | p-value  | VW3_Saline | VW6_Saline | VW7_Saline | VW13_Saline | VW22_Saline | VW23_Saline | VW25_Saline | VW3_LPS | VW6_LPS | VW7_LPS | VW13_LPS | VW22_LPS | VW23_LPS | VW25_LPS | Median_saline | Median_LPS | Fold change |
|--------------|-------------|----------|------------|------------|------------|-------------|-------------|-------------|-------------|---------|---------|---------|----------|----------|----------|----------|---------------|------------|-------------|
| 1562031_at   | JAK2        | 5.45E-03 | 59.5       | 76.4       | 80.2       | 79.4        | 68.6        | 69.0        | 61.2        | 84.2    | 90.4    | 150.6   | 139.5    | 101.2    | 71.0     | 127.9    | 69.0          | 101.2      | 1.5         |
| 205841_at    | JAK2        | 5.12E-04 | 89.7       | 116.1      | 186.2      | 166.9       | 151.7       | 167.2       | 145.7       | 178.9   | 267.9   | 465.4   | 280.5    | 202.2    | 237.9    | 268.2    | 151.7         | 267.9      | 1.8         |
| 205842_s_at  | JAK2        | 2.73E-05 | 269.1      | 358.6      | 448.3      | 404.3       | 435.2       | 361.8       | 378.6       | 580.4   | 724.0   | 968.3   | 729.5    | 683.8    | 715.9    | 787.5    | 378.6         | 724.0      | 1.9         |
| 207187_at    | JAK3        | 1.93E-03 | 63.8       | 80.5       | 69.9       | 85.1        | 90.6        | 46.5        | 106.0       | 100.1   | 85.7    | 142.7   | 127.0    | 107.3    | 116.4    | 144.7    | 69.9          | 116.4      | 1.7         |
| 227677_at    | JAK3        | 4.66E-04 | 312.6      | 91.4       | 174.3      | 327.0       | 272.0       | 75.3        | 348.5       | 617.5   | 275.4   | 521.4   | 545.7    | 824.3    | 519.1    | 849.5    | 272.0         | 545.7      | 2.0         |
| 201473_at    | JUNB        | 1.06E-04 | 404.8      | 266.6      | 457.0      | 459.2       | 554.4       | 419.6       | 493.5       | 671.1   | 794.7   | 1064.8  | 733.9    | 1062.8   | 907.9    | 1091.3   | 457.0         | 907.9      | 2.0         |
| 201015_s_at  | JUP         | 7.35E-03 | 85.7       | 78.8       | 81.5       | 77.9        | 59.5        | 70.9        | 117.3       | 103.9   | 132.1   | 155.3   | 78.8     | 123.6    | 102.1    | 347.8    | 78.8          | 123.6      | 1.6         |
| 227750_at    | KALRN       | 4.31E-03 | 231.0      | 325.9      | 367.7      | 309.6       | 260.7       | 366.9       | 315.4       | 338.0   | 573.0   | 777.4   | 517.9    | 322.9    | 386.3    | 774.4    | 315.4         | 517.9      | 1.6         |
| 200079_s_at  | KARS        | 6.50E-03 | 1121.6     | 1327.2     | 1273.8     | 1172.6      | 1277.6      | 1286.7      | 1178.9      | 1428.8  | 1491.7  | 1571.7  | 1469.7   | 1644.5   | 1527.9   | 1599.1   | 1273.8        | 1527.9     | 1.2         |
| 203845_at    | KAT2B       | 5.62E-04 | 248.0      | 238.8      | 259.0      | 258.8       | 257.1       | 255.0       | 222.0       | 346.4   | 344.9   | 470.6   | 381.9    | 337.0    | 392.6    | 420.9    | 255.0         | 381.9      | 1.5         |
| 210119_at    | KCNJ15      | 1.04E-04 | 65.5       | 71.6       | 38.0       | 29.8        | 43.6        | 44.2        | 34.9        | 141.1   | 192.8   | 282.4   | 107.6    | 251.7    | 159.9    | 262.7    | 43.6          | 192.8      | 4.4         |
| 211806_s_at  | KCNJ15      | 5.66E-03 | 110.4      | 107.2      | 59.9       | 67.5        | 65.0        | 53.6        | 55.6        | 101.9   | 181.2   | 208.7   | 88.4     | 146.2    | 138.5    | 173.3    | 65.0          | 146.2      | 2.2         |
| 206765_at    | KCNJ2       | 2.14E-05 | 53.7       | 57.7       | 128.1      | 97.8        | 228.3       | 95.5        | 147.1       | 203.8   | 610.7   | 1651.5  | 798.5    | 760.5    | 690.5    | 1177.1   | 97.8          | 760.5      | 7.8         |
| 1554710_at   | KCNMB1      | 9.39E-05 | 68.5       | 28.0       | 71.0       | 50.3        | 76.2        | 37.9        | 65.2        | 145.8   | 46.7    | 139.9   | 130.6    | 155.8    | 73.3     | 96.7     | 65.2          | 130.6      | 2.0         |
| 209948_at    | KCNMB1      | 1.59E-03 | 75.3       | 50.1       | 84.3       | 75.2        | 70.5        | 54.0        | 73.9        | 120.5   | 63.3    | 126.7   | 120.7    | 190.9    | 104.6    | 106.0    | 73.9          | 120.5      | 1.6         |
| 204401_at    | KCNNA4      | 1.51E-04 | 156.1      | 103.5      | 106.0      | 94.8        | 122.3       | 57.1        | 100.2       | 311.7   | 190.7   | 302.7   | 339.5    | 389.7    | 331.6    | 427.9    | 103.5         | 331.6      | 3.2         |
| 200700_s_at  | KDEL2       | 8.92E-03 | 761.7      | 803.2      | 821.5      | 815.5       | 842.0       | 671.6       | 989.2       | 944.4   | 958.7   | 1081.4  | 1034.1   | 979.6    | 897.0    | 1034.1   | 815.5         | 979.6      | 1.2         |
| 1556067_a_at | KDM6B       | 4.33E-04 | 43.4       | 31.2       | 57.8       | 48.4        | 55.8        | 62.5        | 61.4        | 56.8    | 65.0    | 92.3    | 70.1     | 100.4    | 94.3     | 98.3     | 55.8          | 92.3       | 1.7         |
| 213146_at    | KDM6B       | 2.04E-03 | 496.4      | 352.1      | 521.2      | 609.6       | 600.7       | 485.6       | 619.5       | 559.4   | 716.4   | 1304.5  | 723.1    | 1129.9   | 992.1    | 1307.9   | 521.2         | 992.1      | 1.9         |
| 41386_i_at   | KDM6B       | 8.15E-04 | 515.5      | 340.2      | 473.2      | 519.9       | 549.9       | 408.3       | 559.4       | 653.4   | 832.6   | 1304.6  | 689.9    | 1078.4   | 994.5    | 1355.2   | 515.5         | 994.5      | 1.9         |
| 41387_r_at   | KDM6B       | 2.96E-03 | 425.2      | 350.9      | 387.6      | 385.7       | 441.2       | 360.1       | 432.2       | 442.9   | 661.9   | 900.3   | 488.4    | 701.4    | 646.1    | 932.6    | 387.6         | 661.9      | 1.7         |
| 203143_s_at  | KIAA0040    | 7.22E-05 | 153.0      | 107.0      | 148.9      | 158.4       | 144.0       | 130.5       | 174.7       | 262.0   | 402.0   | 580.0   | 392.8    | 336.3    | 297.4    | 513.2    | 148.9         | 392.8      | 2.6         |
| 203144_s_at  | KIAA0040    | 1.99E-04 | 124.8      | 113.3      | 123.4      | 113.6       | 131.7       | 118.2       | 138.0       | 187.7   | 302.9   | 324.9   | 220.8    | 204.8    | 239.7    | 365.4    | 123.4         | 239.7      | 1.9         |
| 1554612_at   | KIAA0226    | 4.24E-04 | 34.3       | 29.3       | 40.5       | 32.2        | 47.2        | 38.4        | 41.6        | 62.9    | 50.1    | 92.4    | 57.5     | 63.4     | 58.0     | 60.4     | 38.4          | 60.4       | 1.6         |
| 1554613_a_at | KIAA0226    | 2.45E-03 | 175.5      | 125.1      | 150.7      | 163.6       | 149.3       | 146.9       | 153.3       | 185.7   | 205.0   | 346.4   | 206.8    | 334.2    | 311.7    | 332.2    | 150.7         | 311.7      | 2.1         |
| 212733_at    | KIAA0226    | 1.61E-04 | 269.1      | 287.0      | 343.2      | 376.2       | 332.4       | 391.5       | 359.3       | 477.6   | 692.7   | 1071.4  | 674.6    | 665.4    | 608.5    | 914.4    | 343.2         | 674.6      | 2.0         |
| 212735_at    | KIAA0226    | 4.79E-05 | 114.8      | 127.3      | 207.9      | 155.3       | 229.5       | 182.0       | 176.7       | 293.6   | 245.6   | 559.6   | 331.7    | 385.1    | 343.4    | 481.4    | 176.7         | 343.4      | 1.9         |
| 202181_at    | KIAA0247    | 4.33E-04 | 2909.5     | 2343.5     | 2539.7     | 2371.5      | 2873.2      | 2242.2      | 2939.3      | 3838.4  | 3489.3  | 3773.2  | 3389.3   | 3846.5   | 3738.3   | 4504.8   | 2539.7        | 3773.2     | 1.5         |
| 212946_at    | KIAA0564    | 1.10E-03 | 336.3      | 334.1      | 300.7      | 344.9       | 471.6       | 503.6       | 482.8       | 544.8   | 816.9   | 1329.3  | 776.7    | 661.4    | 885.7    | 1030.7   | 344.9         | 816.9      | 2.4         |
| 215936_s_at  | KIAA1033    | 7.45E-03 | 498.0      | 557.8      | 677.5      | 711.6       | 692.5       | 672.4       | 630.1       | 652.8   | 858.6   | 916.2   | 827.0    | 739.7    | 823.7    | 911.6    | 672.4         | 827.0      | 1.2         |
| 214929_s_at  | KIAA1109    | 6.88E-03 | 93.5       | 129.0      | 151.1      | 146.8       | 200.6       | 197.2       | 161.5       | 161.0   | 142.3   | 214.5   | 196.6    | 241.9    | 228.1    | 239.8    | 151.1         | 214.5      | 1.4         |
| 216294_s_at  | KIAA1109    | 1.67E-03 | 118.9      | 154.7      | 141.9      | 132.6       | 213.0       | 177.7       | 152.5       | 188.9   | 185.4   | 234.2   | 193.8    | 260.2    | 234.6    | 246.3    | 152.5         | 234.2      | 1.5         |
| 233227_at    | KIAA1109    | 6.76E-03 | 219.4      | 275.9      | 289.8      | 256.5       | 356.8       | 367.0       | 328.8       | 337.0   | 366.7   | 535.6   | 362.3    | 434.6    | 366.6    | 501.3    | 289.8         | 366.7      | 1.3         |
| 226248_s_at  | KIAA1324    | 4.84E-03 | 47.2       | 53.6       | 46.6       | 44.2        | 46.9        | 43.9        | 50.3        | 50.1    | 77.6    | 60.4    | 55.9     | 80.9     | 64.6     | 65.9     | 46.9          | 64.6       | 1.4         |
| 224746_at    | KIAA1522    | 2.39E-03 | 85.2       | 113.0      | 84.3       | 90.1        | 96.3        | 81.2        | 81.7        | 113.0   | 129.0   | 163.0   | 115.3    | 156.0    | 119.1    | 131.3    | 85.2          | 129.0      | 1.5         |
| 231956_at    | KIAA1618    | 6.44E-05 | 238.4      | 257.0      | 237.8      | 249.4       | 224.1       | 221.1       | 228.4       | 414.0   | 553.3   | 905.7   | 673.0    | 551.1    | 554.6    | 828.8    | 237.8         | 554.6      | 2.3         |
| 232155_at    | KIAA1618    | 2.43E-05 | 123.9      | 186.2      | 143.2      | 158.7       | 113.1       | 157.5       | 154.9       | 262.6   | 450.9   | 528.3   | 463.8    | 300.2    | 308.5    | 480.7    | 154.9         | 450.9      | 2.9         |
| 241347_at    | KIAA1618    | 4.25E-04 | 416.9      | 360.9      | 251.2      | 367.4       | 355.3       | 306.7       | 340.6       | 543.8   | 720.2   | 823.9   | 723.7    | 708.5    | 846.5    | 1124.9   | 355.3         | 723.7      | 2.0         |
| 224927_at    | KIAA1949    | 7.04E-03 | 712.3      | 474.1      | 678.3      | 657.7       | 766.3       | 624.6       | 755.0       | 778.7   | 749.3   | 860.3   | 774.2    | 935.3    | 890.6    | 1018.0   | 678.3         | 860.3      | 1.3         |
| 230166_at    | KIAA1958    | 3.40E-03 | 42.2       | 47.8       | 47.2       | 42.4        | 51.4        | 63.4        | 38.7        | 54.2    | 71.6    | 85.3    | 77.7     | 62.1     | 71.6     | 60.4     | 47.2          | 71.6       | 1.5         |
| 226968_at    | KIF1B       | 7.29E-03 | 452.2      | 307.6      | 361.2      | 398.6       | 417.2       | 378.2       | 444.8       | 569.6   | 481.9   | 733.8   | 450.1    | 515.0    | 479.1    | 608.6    | 398.6         | 515.0      | 1.3         |
| 212877_at    | KLC1        | 3.28E-04 | 135.8      | 109.2      | 234.1      | 244.5       | 218.0       | 240.1       | 212.2       | 262.2   | 221.6   | 444.4   | 338.3    | 323.0    | 343.3    | 339.7    | 218.0         | 338.3      | 1.6         |
| 212878_s_at  | KLC1        | 5.41E-03 | 190.7      | 154.4      | 203.1      | 222.8       | 192.8       | 213.6       | 202.6       | 244.2   | 170.5   | 264.6   | 257.2    | 325.8    | 309.4    | 274.4    | 202.6         | 264.6      | 1.3         |
| 208961_s_at  | KLF6        | 9.38E-03 | 1108.6     | 736.8      | 756.1      | 842.3       | 792.1       | 673.8       | 761.9       | 1023.8  | 1066.0  | 1425.9  | 929.5    | 1557.1   | 1448.6   | 1383.5   | 761.9         | 1383.5     | 1.8         |
| 224606_at    | KLF6        | 6.89E-03 | 1437.8     | 961.9      | 1012.2     | 1013.6      | 1209.0      | 1069.6      | 981.1       | 1530.6  | 1443.6  | 2146.4  | 1304.7   | 1552.5   | 1395.0   | 1580.4   | 1013.6        | 1530.6     | 1.5         |
| 243982_at    | KLHL28      | 4.92E-04 | 51.7       | 51.6       | 54.9       | 49.9        | 49.7        | 56.7        | 49.5        | 61.7    | 90.5    | 108.2   | 88.2     | 87.7     | 80.7     | 91.9     | 51.6          | 88.2       | 1.7         |
| 226001_at    | KLHL5       | 3.45E-03 | 43.0       | 45.5       | 56.8       | 65.4        | 73.6        | 46.2        | 79.6        | 82.4    | 60.4    | 114.1   | 128.7    | 94.4     | 64.9     | 89.3     | 56.8          | 89.3       | 1.6         |
| 220239_at    | KLHL7       | 6.53E-03 | 116.2      | 118.7      | 154.1      | 130.9       | 130.7       | 137.5       | 157.4       | 153.1   | 147.7   | 188.8   | 168.1    | 156.5    | 159.1    | 191.9    | 130.9         | 159.1      | 1.2         |
| 214470_at    | KLRB1       | 2.82E-03 | 69.9       | 105.6      | 57.5       | 70.9        | 162.9       | 120.4       | 84.2        | 145.1   | 138.5   | 165.5   | 260.4    | 229.3    | 182.6    | 356.2    | 84.2          | 182.6      | 2.2         |
| 205306_x_at  | KMO         | 3.04E-03 | 1294.1     | 1096.5     | 2225.8     | 1659.6      | 2281.3      | 2213.0      | 2094.5      | 2039.3  | 2248.5  | 4317.4  | 2489.4   | 2763.4   | 2808.6   | 2575.8   | 2094.5        | 2575.8     | 1.2         |
| 211138_s_at  | KMO         | 1.69E-03 | 1475.3     | 1182.6     | 2314.4     | 1785.0      | 2426.9      | 2244.3      | 2150.9      | 2137.3  | 2355.3  | 3544.8  | 2646.2   | 2961.6   | 3073.6   | 2811.8   | 2150.9        | 2811.8     | 1.3         |
| 209653_at    | KPNA4       | 9.30E-03 | 186.5      | 192.8      | 217.5      | 203.0       | 251.1       | 238.4       | 267.0       | 285.6   | 219.4   | 395.4   | 302.9    | 338.4    | 264.8    | 303.9    | 217.5         | 302.9      | 1.4         |
| 208974_x_at  | KPNB1       | 8.21E-03 | 5739.3     | 5230.5     | 5032.1     | 5094.9      | 5337.0      | 5399.2      | 5893.0      | 6235.3  | 6686.1  | 7350.1  | 6768.2   | 6148.0   | 7147.9   | 7161.1   | 5337.0        | 6768.2     | 1.3         |
| 213507_x_at  | KPNB1       | 2.68E-03 | 3335.5     | 3591.8     | 2775.3     | 2978.6      | 3293.7      | 3111.9      | 3173.8      | 4152.1  | 4273.0  | 4307.0  | 4073.1   | 4220.8   | 3922.0   | 4623.4   | 3173.8        | 4220.8     | 1.3         |
| 217027_x_at  | KPNB1       | 9.53E-03 | 208.3      | 164.5      | 320.9      | 331.0       | 305.7       | 299.2       | 381.5       | 271.2   | 359.6   | 527.1   | 403.9    | 358.3    | 396.5    | 452.8    | 305.7         | 396.5      | 1.3         |
| 218963_s_at  | KRT23       | 7.90E-04 | 61.6       | 76.4       | 45.3       | 42.0        | 66.6        | 53.6        | 37.0        | 76.4    | 182.8   | 177.7   | 74.6     | 160.1    | 196.0    | 149.5    | 53.6          | 160.1      | 3.0         |
| 204385_at    | KYNU        | 8.18E-04 | 1316.2     | 646.4      | 1282.1     | 1364.4      | 2239.5      | 910.7       | 2209.3      | 2197.2  | 3332.4  | 5397.6  | 3227.9   | 3641.9   | 3389.6   | 4265.2   | 1316.2        | 3389.6     | 2.6         |
| 210662_at    | KYNU        | 2.78E-05 | 65.8       | 26.5       | 52.9       | 55.5        | 45.2        | 45.8        | 79.0        | 195.9   | 89.5    | 299.1   | 165.0    | 104.8    | 214.1    | 219.0    | 52.9          | 195.9      | 3.7         |
| 210663_s_at  | KYNU        | 5.67E-04 | 1831.0     | 702.7      | 1399.9     | 1484.8      | 2554.5      | 958.0       |             |         |         |         |          |          |          |          |               |            |             |

TRANSCRIPTION PROFILES IN ALVEOLAR MACROPHAGES

Supplementary Table S1. Continued.

| ID           | Gene Symbol                                  | p-value  | VW3_Saline | VW6_Saline | VW7_Saline | VW13_Saline | VW22_Saline | VW23_Saline | VW25_Saline | VW3_LPS | VW6_LPS | VW7_LPS | VW13_LPS | VW22_LPS | VW23_LPS | VW25_LPS | Median_saline | Median_LPS | Fold change |
|--------------|----------------------------------------------|----------|------------|------------|------------|-------------|-------------|-------------|-------------|---------|---------|---------|----------|----------|----------|----------|---------------|------------|-------------|
| 205569_at    | LAMP3                                        | 3.20E-05 | 42.4       | 46.0       | 23.1       | 46.9        | 90.7        | 58.1        | 60.2        | 257.0   | 400.7   | 514.6   | 410.2    | 370.7    | 250.1    | 496.7    | 46.9          | 400.7      | 8.5         |
| 218219_s_at  | LANCL2                                       | 5.79E-03 | 458.8      | 436.7      | 390.6      | 475.4       | 539.0       | 409.2       | 445.1       | 520.4   | 545.1   | 669.1   | 564.0    | 668.5    | 602.7    | 628.8    | 445.1         | 602.7      | 1.4         |
| 217933_s_at  | LAP3                                         | 1.02E-04 | 1573.7     | 2009.0     | 1962.5     | 2013.4      | 1942.2      | 1669.2      | 2145.2      | 3206.5  | 3140.7  | 3938.1  | 3065.0   | 3094.4   | 3259.4   | 3536.6   | 1962.5        | 3206.5     | 1.6         |
| 226750_at    | LARP1B                                       | 5.84E-03 | 67.8       | 87.0       | 117.1      | 90.2        | 140.3       | 117.8       | 146.7       | 125.0   | 110.0   | 237.3   | 147.4    | 152.1    | 150.1    | 190.4    | 117.1         | 150.1      | 1.3         |
| 231011_at    | LARP2                                        | 6.95E-03 | 54.6       | 49.2       | 106.2      | 96.0        | 102.2       | 90.4        | 92.1        | 94.3    | 100.6   | 170.3   | 111.4    | 111.8    | 112.1    | 129.6    | 92.1          | 111.8      | 1.2         |
| 213261_at    | LBA1                                         | 7.96E-04 | 115.6      | 105.6      | 163.0      | 160.3       | 129.0       | 131.8       | 136.5       | 162.0   | 143.0   | 210.3   | 226.8    | 245.5    | 228.0    | 227.1    | 131.8         | 226.8      | 1.7         |
| 221011_s_at  | LBH                                          | 1.95E-03 | 40.6       | 51.4       | 43.0       | 67.5        | 81.2        | 53.0        | 39.9        | 66.7    | 88.2    | 125.8   | 191.8    | 91.5     | 81.1     | 89.3     | 51.4          | 89.3       | 1.7         |
| 205269_at    | LCP2                                         | 7.47E-03 | 841.5      | 746.0      | 1069.8     | 1158.5      | 1391.0      | 1224.4      | 1387.0      | 1174.2  | 1520.4  | 2355.2  | 1293.3   | 1928.9   | 1346.2   | 2165.8   | 1158.5        | 1520.4     | 1.3         |
| 205270_s_at  | LCP2                                         | 2.72E-03 | 2255.2     | 1732.7     | 2074.6     | 2227.1      | 2471.0      | 1951.3      | 2227.2      | 2816.4  | 2978.6  | 3586.3  | 2276.3   | 4051.0   | 3134.4   | 4008.1   | 2227.1        | 3134.4     | 1.4         |
| 244556_at    | LCP2                                         | 3.64E-05 | 72.6       | 53.7       | 98.4       | 76.5        | 96.2        | 96.2        | 101.3       | 142.4   | 134.4   | 338.6   | 146.6    | 280.0    | 205.7    | 236.1    | 96.2          | 205.7      | 2.1         |
| 244578_at    | LCP2                                         | 1.18E-04 | 38.7       | 39.3       | 62.4       | 58.1        | 73.5        | 54.0        | 70.2        | 93.0    | 83.0    | 218.5   | 87.3     | 185.5    | 108.1    | 156.5    | 58.1          | 108.1      | 1.9         |
| 202067_s_at  | LDLR                                         | 1.16E-03 | 71.0       | 40.2       | 33.9       | 33.8        | 73.1        | 37.5        | 56.2        | 81.4    | 58.1    | 84.8    | 58.1     | 159.0    | 85.8     | 97.0     | 40.2          | 84.8       | 2.1         |
| 202068_s_at  | LDLR                                         | 1.05E-04 | 410.8      | 183.9      | 124.6      | 151.9       | 466.5       | 171.7       | 394.4       | 557.6   | 617.6   | 760.9   | 313.5    | 968.0    | 728.1    | 919.0    | 183.9         | 728.1      | 4.0         |
| 217173_s_at  | LDLR                                         | 1.69E-03 | 463.0      | 260.2      | 159.7      | 195.1       | 376.1       | 164.0       | 379.4       | 575.3   | 539.0   | 544.0   | 267.9    | 979.1    | 649.8    | 818.6    | 260.2         | 575.3      | 2.2         |
| 217183_at    | LDLR                                         | 2.95E-04 | 246.0      | 172.6      | 111.0      | 129.8       | 239.8       | 139.7       | 220.5       | 354.5   | 306.4   | 319.0   | 199.8    | 586.8    | 353.7    | 493.3    | 172.6         | 353.7      | 2.0         |
| 208450_at    | LGALS2                                       | 2.45E-03 | 135.6      | 80.2       | 76.4       | 78.1        | 135.8       | 106.5       | 80.9        | 176.2   | 112.0   | 87.5    | 109.8    | 216.0    | 218.0    | 130.6    | 80.9          | 130.6      | 1.6         |
| 212658_at    | LHFPL2                                       | 2.08E-03 | 4130.4     | 2778.7     | 1805.6     | 2559.3      | 2917.6      | 1698.4      | 3013.8      | 4676.6  | 4051.9  | 3463.9  | 4042.4   | 3879.7   | 3661.7   | 4661.5   | 2778.7        | 4042.4     | 1.5         |
| 206235_at    | LIG4                                         | 6.81E-03 | 357.5      | 290.5      | 424.1      | 387.4       | 420.0       | 431.1       | 422.6       | 440.4   | 418.3   | 619.6   | 489.6    | 432.1    | 563.7    | 565.7    | 420.0         | 489.6      | 1.2         |
| 207872_s_at  | LILRA1                                       | 9.33E-04 | 42.4       | 49.7       | 46.3       | 38.5        | 41.5        | 46.0        | 46.1        | 132.4   | 64.1    | 135.1   | 81.8     | 276.9    | 113.2    | 218.0    | 46.0          | 132.4      | 2.9         |
| 210660_at    | LILRA1                                       | 6.92E-05 | 88.9       | 71.8       | 89.3       | 68.1        | 89.4        | 96.5        | 74.9        | 325.8   | 157.0   | 296.0   | 236.7    | 605.2    | 273.6    | 489.4    | 88.9          | 296.0      | 3.3         |
| 206881_s_at  | LILRA3                                       | 2.86E-03 | 92.3       | 98.4       | 75.9       | 68.7        | 78.3        | 55.9        | 72.6        | 150.6   | 111.1   | 205.2   | 160.8    | 312.8    | 198.3    | 563.1    | 75.9          | 198.3      | 2.6         |
| 1555634_a_at | LILRA5                                       | 4.68E-03 | 89.5       | 48.2       | 55.8       | 53.7        | 64.1        | 63.5        | 49.2        | 86.8    | 77.2    | 176.5   | 100.7    | 118.6    | 98.0     | 153.1    | 55.8          | 100.7      | 1.8         |
| 1555643_s_at | LILRA5                                       | 1.38E-03 | 195.2      | 119.6      | 192.8      | 195.3       | 234.1       | 204.2       | 136.4       | 339.4   | 172.2   | 297.4   | 295.3    | 599.1    | 534.1    | 506.3    | 195.2         | 339.4      | 1.7         |
| 215838_at    | LILRA5                                       | 8.28E-04 | 300.4      | 211.5      | 252.0      | 267.4       | 326.1       | 298.2       | 179.4       | 597.4   | 331.6   | 437.9   | 429.0    | 844.0    | 789.0    | 792.0    | 267.4         | 597.4      | 2.2         |
| 215839_at    | LILRA5                                       | 1.22E-03 | 163.8      | 130.6      | 183.7      | 186.2       | 219.9       | 209.2       | 152.0       | 310.2   | 173.7   | 300.0   | 276.9    | 458.5    | 507.6    | 533.0    | 183.7         | 310.2      | 1.7         |
| 207104_x_at  | LILRB1                                       | 4.40E-03 | 1001.0     | 725.5      | 1056.4     | 1079.1      | 981.4       | 659.4       | 1094.0      | 1131.7  | 1046.7  | 1694.5  | 1316.2   | 2298.4   | 1733.9   | 1936.8   | 1001.0        | 1694.5     | 1.7         |
| 211336_x_at  | LILRB1                                       | 2.68E-03 | 961.7      | 634.1      | 996.9      | 994.9       | 844.3       | 598.3       | 1010.5      | 1219.8  | 1025.0  | 1579.1  | 1291.8   | 2449.4   | 1678.4   | 1843.3   | 961.7         | 1579.1     | 1.6         |
| 229937_x_at  | LILRB1                                       | 4.79E-05 | 3026.6     | 2866.5     | 3464.8     | 3823.0      | 3658.8      | 3133.7      | 3170.0      | 4966.5  | 5479.4  | 6157.6  | 5834.8   | 5966.7   | 5701.9   | 5650.9   | 3170.0        | 5701.9     | 1.8         |
| 207697_x_at  | LILRB2                                       | 6.59E-04 | 1386.2     | 1245.2     | 1687.9     | 1753.2      | 1633.0      | 1446.4      | 1328.5      | 2174.8  | 1870.8  | 2763.7  | 2964.1   | 4225.5   | 4155.4   | 4028.0   | 1446.4        | 2964.1     | 2.0         |
| 210146_x_at  | LILRB2                                       | 3.83E-04 | 627.8      | 564.4      | 988.3      | 973.0       | 926.1       | 918.4       | 686.6       | 969.4   | 1110.3  | 1708.9  | 1825.0   | 1785.5   | 2175.0   | 2535.7   | 918.4         | 1785.5     | 1.9         |
| 1569504_at   | LILRB4                                       | 1.53E-03 | 59.3       | 69.9       | 60.9       | 54.8        | 69.3        | 53.6        | 61.5        | 106.6   | 74.8    | 119.7   | 86.9     | 105.0    | 83.6     | 90.3     | 60.9          | 90.3       | 1.5         |
| 210152_at    | LILRB4                                       | 7.96E-03 | 371.9      | 221.6      | 463.6      | 299.0       | 319.8       | 150.9       | 730.8       | 381.3   | 361.8   | 796.2   | 447.3    | 933.2    | 690.0    | 1253.9   | 319.8         | 690.0      | 2.2         |
| 202193_at    | LIMK2                                        | 2.84E-04 | 2040.2     | 1726.3     | 1831.0     | 1823.1      | 3069.8      | 1819.6      | 3126.7      | 3640.0  | 4294.4  | 5624.4  | 4213.2   | 4288.0   | 4423.2   | 5259.4   | 1831.0        | 4294.4     | 2.3         |
| 210582_s_at  | LIMK2                                        | 6.92E-05 | 339.5      | 225.9      | 306.0      | 291.8       | 617.4       | 338.5       | 596.9       | 750.4   | 887.5   | 1245.7  | 929.1    | 1141.3   | 1206.0   | 1326.9   | 338.5         | 1141.3     | 3.4         |
| 217475_s_at  | LIMK2                                        | 1.46E-04 | 66.3       | 59.6       | 113.0      | 113.2       | 128.4       | 90.6        | 150.7       | 133.6   | 123.5   | 265.2   | 186.4    | 276.0    | 338.0    | 293.3    | 113.0         | 265.2      | 2.3         |
| 236156_at    | LIPA                                         | 4.55E-05 | 63.9       | 72.6       | 79.9       | 76.6        | 57.6        | 44.2        | 50.5        | 156.3   | 208.4   | 456.5   | 185.0    | 156.1    | 161.7    | 241.9    | 63.9          | 185.0      | 2.9         |
| 203276_at    | LMNB1                                        | 8.26E-04 | 68.3       | 68.4       | 79.5       | 79.7        | 69.7        | 59.6        | 76.9        | 85.9    | 92.5    | 191.8   | 145.9    | 119.0    | 99.7     | 156.4    | 69.7          | 119.0      | 1.7         |
| 209204_at    | LMO4                                         | 7.77E-03 | 176.3      | 136.8      | 156.1      | 184.2       | 195.1       | 158.8       | 201.1       | 228.0   | 155.4   | 261.6   | 228.4    | 240.1    | 348.3    | 288.3    | 176.3         | 240.1      | 1.4         |
| 209205_s_at  | LMO4                                         | 3.41E-03 | 533.8      | 447.5      | 631.7      | 503.9       | 720.7       | 618.0       | 799.7       | 754.0   | 707.3   | 1205.2  | 999.8    | 814.2    | 904.5    | 949.9    | 618.0         | 904.5      | 1.5         |
| 227155_at    | LMO4                                         | 6.74E-03 | 143.0      | 118.2      | 153.2      | 154.3       | 172.5       | 181.9       | 205.1       | 194.7   | 164.7   | 212.9   | 234.1    | 184.2    | 236.1    | 230.5    | 154.3         | 212.9      | 1.4         |
| 1556643_at   | LOC100128718                                 | 2.39E-03 | 434.8      | 595.0      | 658.9      | 510.1       | 465.3       | 543.5       | 528.9       | 621.8   | 884.2   | 1299.6  | 805.6    | 576.9    | 617.2    | 831.6    | 528.9         | 805.6      | 1.5         |
| 1555392_at   | LOC100128868                                 | 7.44E-03 | 68.0       | 44.4       | 52.2       | 79.2        | 68.3        | 59.6        | 54.8        | 74.1    | 60.7    | 119.1   | 153.9    | 86.7     | 77.5     | 77.2     | 59.6          | 77.5       | 1.3         |
| 226526_s_at  | LOC100130905                                 | 8.91E-04 | 87.8       | 82.5       | 65.1       | 96.0        | 60.3        | 50.8        | 75.8        | 133.9   | 106.0   | 169.9   | 150.7    | 153.4    | 152.5    | 189.7    | 75.8          | 152.5      | 2.0         |
| 244659_at    | LOC100131015                                 | 6.32E-03 | 47.0       | 44.9       | 59.8       | 55.0        | 54.1        | 44.7        | 49.8        | 58.2    | 50.8    | 67.2    | 79.0     | 69.3     | 61.8     | 78.3     | 49.8          | 67.2       | 1.4         |
| 228675_at    | LOC100131733                                 | 7.78E-03 | 102.7      | 116.9      | 112.9      | 97.6        | 82.9        | 111.6       | 102.7       | 130.6   | 113.4   | 160.1   | 145.1    | 165.8    | 155.5    | 152.3    | 102.7         | 152.3      | 1.5         |
| 212707_s_at  | LOC100132214 /// RASA4 /// RASA4B /// RASA4P | 8.52E-04 | 231.5      | 313.9      | 324.9      | 362.6       | 380.5       | 333.3       | 325.9       | 286.3   | 532.4   | 533.6   | 545.9    | 543.7    | 655.8    | 444.2    | 325.9         | 533.6      | 1.6         |
| 1559125_at   | LOC100133019                                 | 3.17E-04 | 66.7       | 57.0       | 78.5       | 63.8        | 86.7        | 66.0        | 68.3        | 101.0   | 114.9   | 230.5   | 113.3    | 135.9    | 113.1    | 127.0    | 66.7          | 114.9      | 1.7         |
| 226407_at    | LOC100190939                                 | 5.83E-04 | 147.4      | 119.0      | 199.5      | 181.7       | 170.8       | 131.2       | 183.2       | 222.4   | 209.5   | 511.8   | 294.3    | 247.3    | 203.8    | 283.5    | 170.8         | 247.3      | 1.4         |
| 227709_at    | LOC100190939                                 | 5.12E-04 | 219.0      | 218.2      | 376.1      | 317.0       | 324.8       | 240.3       | 371.6       | 426.1   | 335.1   | 834.8   | 495.7    | 456.9    | 437.7    | 500.4    | 317.0         | 456.9      | 1.4         |
| 227710_s_at  | LOC100190939                                 | 4.35E-03 | 151.7      | 101.9      | 184.3      | 190.1       | 196.7       | 162.6       | 203.8       | 196.5   | 148.9   | 314.2   | 227.5    | 231.2    | 244.5    | 245.9    | 184.3         | 231.2      | 1.3         |
| 228913_at    | LOC100190939                                 | 5.77E-03 | 99.4       | 142.6      | 240.7      | 221.3       | 195.8       | 201.7       | 229.6       | 189.5   | 204.4   | 615.7   | 349.0    | 244.5    | 232.4    | 300.5    | 201.7         | 244.5      | 1.2         |
| 229424_s_at  | LOC100288194 /// LOC100293513                | 2.91E-03 | 194.3      | 187.2      | 250.3      | 280.1       | 239.6       | 213.5       | 195.4       | 247.0   | 268.8   | 328.3   | 312.5    | 395.1    | 398.6    | 347.1    | 213.5         | 328.3      | 1.5         |
| 214084_x_at  | LOC100289727 /// NCF1 /// NCF1B /// NCF1C    | 3.76E-05 | 674.0      | 268.0      | 537.5      | 598.5       | 600.2       | 336.6       | 399.3       | 1782.1  | 1853.5  | 2975.3  | 2013.5   | 2346.5   | 3155.0   | 1619.4   | 537.5         | 2013.5     | 3.7         |

Continued



Supplementary Table S1. *Continued.*

| ID           | Gene Symbol           | p-value  | VW3_Saline | VW6_Saline | VW7_Saline | VW13_Saline | VW22_Saline | VW23_Saline | VW25_Saline | VW3_LPS | VW6_LPS | VW7_LPS | VW13_LPS | VW22_LPS | VW23_LPS | VW25_LPS | Median_saline | Median_LPS | Fold change |
|--------------|-----------------------|----------|------------|------------|------------|-------------|-------------|-------------|-------------|---------|---------|---------|----------|----------|----------|----------|---------------|------------|-------------|
| 236898_at    | LOC100290882          | 1.49E-03 | 34.9       | 42.4       | 74.7       | 68.3        | 80.3        | 71.5        | 94.5        | 68.7    | 62.6    | 225.2   | 75.0     | 167.7    | 148.5    | 178.8    | 71.5          | 148.5      | 2.1         |
| 201205_at    | LOC100292328          | 6.13E-03 | 461.9      | 388.7      | 372.9      | 377.4       | 375.1       | 372.7       | 386.9       | 515.8   | 448.6   | 572.2   | 451.3    | 534.7    | 509.1    | 516.0    | 377.4         | 515.8      | 1.4         |
| 1567440_at   | LOC100293538          | 2.66E-04 | 251.7      | 190.1      | 294.3      | 286.6       | 310.9       | 252.5       | 270.1       | 330.1   | 294.0   | 531.7   | 492.5    | 447.6    | 471.2    | 503.2    | 270.1         | 471.2      | 1.7         |
| 231387_at    | LOC100293912          | 1.43E-03 | 552.0      | 469.0      | 459.2      | 435.7       | 552.8       | 363.0       | 567.3       | 691.5   | 806.3   | 915.5   | 603.2    | 740.6    | 724.0    | 796.6    | 469.0         | 740.6      | 1.6         |
| 1568768_s_at | LOC100302650 /// RBKS | 3.84E-04 | 43.0       | 34.2       | 60.6       | 46.3        | 64.3        | 29.0        | 45.2        | 65.5    | 88.0    | 196.7   | 75.0     | 232.6    | 78.7     | 205.3    | 45.2          | 88.0       | 1.9         |
| 1554115_at   | LOC133874             | 6.45E-04 | 131.8      | 104.9      | 164.1      | 170.7       | 146.2       | 131.4       | 137.4       | 211.5   | 206.1   | 478.5   | 222.9    | 308.6    | 207.4    | 260.7    | 137.4         | 222.9      | 1.6         |
| 238654_at    | LOC147645             | 5.25E-03 | 82.6       | 88.0       | 121.2      | 87.7        | 83.6        | 55.3        | 75.6        | 106.3   | 99.3    | 144.6   | 111.7    | 105.6    | 76.4     | 116.9    | 83.6          | 106.3      | 1.3         |
| 1557049_at   | LOC149478             | 3.42E-04 | 117.3      | 89.3       | 127.2      | 131.5       | 174.8       | 77.4        | 178.4       | 219.2   | 174.9   | 443.5   | 259.5    | 268.5    | 229.7    | 319.7    | 127.2         | 259.5      | 2.0         |
| 238102_s_at  | LOC149478             | 6.66E-04 | 79.6       | 41.1       | 84.3       | 75.2        | 75.5        | 51.5        | 105.4       | 111.5   | 124.9   | 292.2   | 213.9    | 167.6    | 231.7    | 165.3    | 75.5          | 167.6      | 2.2         |
| 238058_at    | LOC150381             | 4.87E-03 | 341.5      | 271.4      | 361.2      | 289.1       | 346.2       | 355.5       | 353.2       | 374.7   | 384.6   | 487.8   | 371.9    | 431.7    | 467.7    | 437.9    | 346.2         | 431.7      | 1.2         |
| 227868_at    | LOC154761             | 9.27E-04 | 50.8       | 51.8       | 40.8       | 47.6        | 47.4        | 47.1        | 34.7        | 72.5    | 78.7    | 64.5    | 86.2     | 68.7     | 54.2     | 58.6     | 47.4          | 68.7       | 1.5         |
| 211012_s_at  | LOC161527 /// PML     | 2.00E-05 | 315.7      | 197.3      | 279.8      | 317.4       | 275.4       | 237.3       | 294.8       | 676.6   | 725.9   | 1178.9  | 737.6    | 917.2    | 934.7    | 1212.3   | 279.8         | 917.2      | 3.3         |
| 211014_s_at  | LOC161527 /// PML     | 7.51E-05 | 52.9       | 42.6       | 76.3       | 90.0        | 62.7        | 53.1        | 78.9        | 101.7   | 99.7    | 191.5   | 139.3    | 144.9    | 162.6    | 157.3    | 62.7          | 144.9      | 2.3         |
| 1563745_a_at | LOC283050             | 1.04E-03 | 92.6       | 50.3       | 71.1       | 62.9        | 117.4       | 32.2        | 82.3        | 126.7   | 102.6   | 155.5   | 90.0     | 199.7    | 94.0     | 123.8    | 71.1          | 123.8      | 1.7         |
| 1556854_at   | LOC283501             | 8.68E-03 | 56.6       | 44.9       | 66.7       | 67.0        | 52.8        | 55.3        | 88.3        | 69.2    | 71.8    | 81.9    | 79.6     | 69.5     | 77.4     | 95.2     | 56.6          | 77.4       | 1.4         |
| 227415_at    | LOC283508             | 1.19E-03 | 123.4      | 137.4      | 172.7      | 103.8       | 223.2       | 155.4       | 193.3       | 211.3   | 244.7   | 488.0   | 247.9    | 242.5    | 296.9    | 355.0    | 155.4         | 247.9      | 1.6         |
| 237032_x_at  | LOC283567             | 1.07E-03 | 57.2       | 66.5       | 47.5       | 74.5        | 81.7        | 54.7        | 71.3        | 88.7    | 139.9   | 273.5   | 191.0    | 148.0    | 110.4    | 289.9    | 66.5          | 148.0      | 2.2         |
| 230353_at    | LOC284112             | 3.37E-03 | 208.2      | 178.9      | 185.2      | 232.2       | 255.0       | 186.2       | 221.5       | 228.3   | 214.9   | 314.8   | 300.4    | 403.1    | 280.5    | 349.6    | 208.2         | 300.4      | 1.4         |
| 1555847_a_at | LOC284454             | 8.12E-03 | 3067.1     | 2212.1     | 1659.8     | 1724.2      | 1718.8      | 1256.9      | 1542.6      | 2826.6  | 2917.0  | 2560.2  | 2274.2   | 3435.0   | 2767.3   | 3206.5   | 1718.8        | 2826.6     | 1.6         |
| 235317_at    | LOC284454             | 1.64E-03 | 86.7       | 71.3       | 62.6       | 61.1        | 64.9        | 53.1        | 65.8        | 97.4    | 99.0    | 93.1    | 83.8     | 99.9     | 99.8     | 109.9    | 64.9          | 99.0       | 1.5         |
| 232504_at    | LOC285628             | 1.51E-04 | 156.5      | 106.7      | 327.2      | 132.4       | 533.0       | 113.5       | 308.5       | 556.2   | 760.7   | 1607.5  | 693.0    | 1051.1   | 981.4    | 788.0    | 156.5         | 788.0      | 5.0         |
| 243601_at    | LOC285957             | 6.50E-05 | 99.7       | 76.4       | 116.5      | 114.4       | 173.5       | 152.1       | 156.7       | 284.4   | 159.0   | 497.9   | 302.7    | 320.3    | 587.3    | 439.1    | 116.5         | 320.3      | 2.7         |
| 238893_at    | LOC338758             | 1.02E-03 | 48.1       | 54.0       | 82.3       | 86.5        | 71.8        | 86.1        | 82.3        | 91.5    | 92.6    | 210.9   | 106.0    | 131.8    | 123.2    | 129.5    | 82.3          | 123.2      | 1.5         |
| 238790_at    | LOC374443             | 5.42E-03 | 33.1       | 50.9       | 24.5       | 35.3        | 23.1        | 25.0        | 27.7        | 56.5    | 59.3    | 154.6   | 61.7     | 42.9     | 58.6     | 59.4     | 27.7          | 59.3       | 2.1         |
| 228786_at    | LOC387647             | 3.42E-04 | 176.2      | 143.1      | 186.0      | 133.9       | 159.2       | 125.6       | 111.3       | 245.1   | 215.0   | 388.9   | 196.7    | 236.4    | 230.8    | 188.8    | 143.1         | 230.8      | 1.6         |
| 1560058_at   | LOC399900             | 1.57E-04 | 51.6       | 80.4       | 102.1      | 71.6        | 63.7        | 70.5        | 66.6        | 136.7   | 152.8   | 344.7   | 142.8    | 127.5    | 118.0    | 119.8    | 70.5          | 136.7      | 1.9         |
| 226582_at    | LOC400043             | 5.94E-04 | 100.0      | 118.1      | 142.9      | 80.8        | 151.1       | 194.7       | 145.8       | 162.3   | 265.2   | 375.8   | 109.5    | 212.9    | 476.4    | 311.0    | 142.9         | 265.2      | 1.9         |
| 227885_at    | LOC400236             | 1.58E-03 | 52.4       | 41.4       | 60.1       | 67.9        | 78.8        | 77.0        | 72.3        | 77.3    | 55.0    | 95.6    | 108.5    | 101.6    | 95.7     | 91.0     | 67.9          | 95.6       | 1.4         |
| 227887_at    | LOC400236             | 2.90E-03 | 46.8       | 41.0       | 51.0       | 61.2        | 51.4        | 63.4        | 57.3        | 55.0    | 51.9    | 69.8    | 83.6     | 88.0     | 87.6     | 72.5     | 51.4          | 72.5       | 1.4         |
| 1560520_at   | LOC401312             | 3.05E-04 | 30.3       | 42.3       | 29.6       | 20.6        | 29.5        | 26.9        | 28.3        | 50.9    | 82.1    | 107.4   | 66.1     | 47.2     | 62.1     | 96.2     | 29.5          | 66.1       | 2.2         |
| 232001_at    | LOC439949             | 4.34E-03 | 40.9       | 38.4       | 55.9       | 106.4       | 54.2        | 63.9        | 56.4        | 53.3    | 60.8    | 110.3   | 115.6    | 96.9     | 78.7     | 81.4     | 55.9          | 81.4       | 1.5         |
| 1556378_a_at | LOC440896             | 4.54E-06 | 40.0       | 28.1       | 45.3       | 39.4        | 71.3        | 34.0        | 56.4        | 360.9   | 705.0   | 1309.2  | 353.6    | 729.2    | 487.6    | 874.2    | 40.0          | 705.0      | 17.6        |
| 1556883_a_at | LOC440896             | 4.15E-03 | 41.6       | 48.1       | 34.5       | 30.8        | 31.6        | 32.5        | 34.8        | 44.5    | 75.8    | 216.2   | 57.8     | 109.9    | 71.6     | 133.7    | 34.5          | 75.8       | 2.2         |
| 1570388_a_at | LOC440896             | 1.15E-05 | 26.5       | 38.4       | 36.5       | 15.6        | 30.2        | 19.8        | 24.2        | 127.0   | 349.3   | 911.2   | 174.7    | 197.1    | 171.5    | 293.7    | 26.5          | 197.1      | 7.4         |
| 232253_at    | LOC441108             | 4.22E-03 | 78.1       | 91.3       | 72.0       | 56.8        | 89.6        | 73.7        | 61.6        | 103.5   | 128.8   | 177.3   | 137.7    | 111.0    | 91.8     | 117.0    | 73.7          | 117.0      | 1.6         |
| 1562749_at   | LOC644090             | 6.02E-04 | 64.4       | 52.4       | 43.4       | 32.1        | 54.9        | 32.5        | 49.8        | 106.5   | 72.4    | 108.7   | 144.9    | 171.9    | 117.2    | 119.1    | 49.8          | 117.2      | 2.4         |
| 238319_at    | LOC644090             | 5.44E-03 | 85.1       | 78.6       | 50.6       | 65.0        | 40.2        | 39.1        | 72.9        | 113.2   | 80.1    | 95.8    | 118.7    | 105.8    | 77.6     | 93.8     | 65.0          | 95.8       | 1.5         |
| 229566_at    | LOC645638             | 8.85E-03 | 314.0      | 440.1      | 143.6      | 232.8       | 152.7       | 204.2       | 252.8       | 379.3   | 538.7   | 172.9   | 275.6    | 190.6    | 342.7    | 314.4    | 232.8         | 314.4      | 1.4         |
| 211588_s_at  | LOC652346 /// PML     | 5.69E-05 | 60.4       | 54.3       | 73.1       | 69.3        | 67.8        | 75.9        | 68.0        | 115.3   | 79.6    | 163.4   | 156.7    | 172.9    | 165.0    | 136.1    | 68.0          | 156.7      | 2.3         |
| 201239_s_at  | LOC653566 /// SPCS2   | 6.50E-03 | 1527.6     | 1508.4     | 1478.2     | 1449.6      | 1477.3      | 1476.8      | 1534.5      | 1776.6  | 1850.3  | 2067.8  | 1960.9   | 1711.1   | 1851.6   | 1875.0   | 1478.2        | 1851.6     | 1.3         |
| 227384_s_at  | LOC727820             | 4.41E-03 | 508.8      | 468.2      | 517.1      | 445.6       | 460.5       | 518.9       | 420.6       | 590.7   | 562.3   | 825.4   | 660.6    | 543.4    | 676.3    | 643.0    | 468.2         | 643.0      | 1.4         |
| 231247_s_at  | LOC727820             | 9.11E-03 | 508.2      | 501.2      | 566.3      | 424.7       | 536.2       | 559.6       | 478.7       | 688.3   | 557.8   | 809.2   | 781.0    | 599.7    | 675.5    | 670.7    | 508.2         | 675.5      | 1.3         |
| 229678_at    | LOC728431             | 1.02E-03 | 57.7       | 45.6       | 65.3       | 55.9        | 59.3        | 43.7        | 69.6        | 81.8    | 77.1    | 131.4   | 93.1     | 87.1     | 113.2    | 92.6     | 57.7          | 92.6       | 1.6         |
| 229200_at    | LOC729810             | 6.92E-04 | 708.4      | 691.7      | 896.7      | 587.4       | 567.4       | 467.2       | 651.2       | 859.4   | 1090.4  | 1395.9  | 904.0    | 840.3    | 942.8    | 1268.1   | 651.2         | 942.8      | 1.4         |
| 1559777_at   | LOC731424             | 4.92E-05 | 127.0      | 59.3       | 106.9      | 62.5        | 206.3       | 116.8       | 316.7       | 442.0   | 424.6   | 965.5   | 291.3    | 550.3    | 958.3    | 1087.3   | 116.8         | 550.3      | 4.7         |
| 1569095_at   | LOC731424             | 2.98E-04 | 1546.5     | 488.7      | 679.2      | 1006.6      | 1767.6      | 539.4       | 1601.7      | 3357.7  | 4456.5  | 5748.7  | 3266.0   | 4602.0   | 5107.0   | 5728.0   | 1006.6        | 4602.0     | 4.6         |
| 226038_at    | LONRF1                | 4.54E-03 | 691.5      | 379.2      | 752.0      | 758.8       | 939.7       | 525.1       | 1106.7      | 861.6   | 885.2   | 1555.5  | 1267.3   | 1018.7   | 1043.1   | 1427.7   | 752.0         | 1043.1     | 1.4         |
| 236556_s_at  | LONRF1                | 5.22E-03 | 114.6      | 86.8       | 101.2      | 105.5       | 120.3       | 102.4       | 128.2       | 130.5   | 114.3   | 175.2   | 129.9    | 151.5    | 141.6    | 165.1    | 105.5         | 141.6      | 1.3         |
| 204036_at    | LPAR1                 | 5.16E-03 | 82.1       | 82.7       | 75.3       | 156.5       | 183.2       | 96.7        | 265.9       | 174.2   | 131.8   | 250.5   | 336.1    | 207.3    | 280.9    | 294.7    | 96.7          | 250.5      | 2.6         |
| 204037_at    | LPAR1                 | 5.31E-03 | 1130.9     | 863.8      | 556.6      | 956.3       | 1411.5      | 881.5       | 1513.5      | 1716.1  | 1370.7  | 1470.5  | 1961.2   | 1422.7   | 1875.6   | 1896.6   | 956.3         | 1716.1     | 1.8         |
| 204038_s_at  | LPAR1                 | 8.10E-04 | 98.2       | 74.6       | 76.8       | 131.7       | 166.9       | 90.4        | 202.3       | 197.6   | 163.8   | 239.3   | 311.7    | 222.2    | 314.7    | 297.2    | 98.2          | 239.3      | 2.4         |
| 1555058_a_at | LPGAT1                | 9.31E-03 | 205.3      | 221.0      | 227.4      | 243.0       | 257.9       | 284.8       | 261.3       | 275.7   | 238.3   | 376.2   | 297.0    | 301.9    | 356.8    | 354.5    | 243.0         | 301.9      | 1.2         |
| 230996_at    | LPP                   | 3.37E-03 | 110.7      | 86.1       | 134.1      | 146.7       | 155.4       | 150.4       | 130.4       | 144.6   | 132.2   | 192.4   | 165.3    | 190.2    | 209.2    | 167.8    |               |            |             |

TRANSCRIPTION PROFILES IN ALVEOLAR MACROPHAGES

Supplementary Table S1. Continued.

| ID           | Gene Symbol | p-value  | VW3_Saline | VW6_Saline | VW7_Saline | VW13_Saline | VW22_Saline | VW23_Saline | VW25_Saline | VW3_LPS | VW6_LPS | VW7_LPS | VW13_LPS | VW22_LPS | VW23_LPS | VW25_LPS | Median_saline | Median_LPS | Fold change |
|--------------|-------------|----------|------------|------------|------------|-------------|-------------|-------------|-------------|---------|---------|---------|----------|----------|----------|----------|---------------|------------|-------------|
| 222068_s_at  | LRRC50      | 2.14E-05 | 102.8      | 109.7      | 89.0       | 76.7        | 83.0        | 87.0        | 93.9        | 321.7   | 514.6   | 936.1   | 458.9    | 546.5    | 786.8    | 1256.0   | 89.0          | 546.5      | 6.1         |
| 222231_s_at  | LRRC59      | 7.19E-03 | 572.4      | 608.2      | 547.1      | 664.0       | 685.8       | 606.5       | 720.3       | 839.9   | 733.9   | 903.6   | 778.2    | 781.8    | 819.9    | 879.0    | 608.2         | 819.9      | 1.3         |
| 202245_at    | LSS         | 2.47E-05 | 219.0      | 137.0      | 152.8      | 235.4       | 270.1       | 139.3       | 242.3       | 465.3   | 516.2   | 709.4   | 586.1    | 711.3    | 504.4    | 719.7    | 219.0         | 586.1      | 2.7         |
| 211018_at    | LSS         | 4.69E-05 | 65.3       | 72.1       | 74.9       | 66.4        | 144.2       | 65.6        | 121.1       | 146.1   | 133.2   | 246.0   | 165.7    | 263.6    | 186.6    | 262.0    | 72.1          | 186.6      | 2.6         |
| 211019_s_at  | LSS         | 1.41E-03 | 69.7       | 48.9       | 35.0       | 43.8        | 53.1        | 36.8        | 56.2        | 78.2    | 73.3    | 132.6   | 97.6     | 136.6    | 100.8    | 128.2    | 48.9          | 100.8      | 2.1         |
| 206975_at    | LTA         | 2.04E-03 | 45.2       | 17.0       | 39.2       | 51.9        | 38.3        | 40.6        | 42.3        | 50.0    | 39.6    | 62.8    | 77.8     | 55.8     | 68.7     | 64.7     | 40.6          | 62.8       | 1.5         |
| 202625_at    | LYN         | 1.00E-03 | 1527.7     | 1095.6     | 1821.0     | 1910.4      | 2227.9      | 1790.3      | 2807.1      | 2390.4  | 2949.6  | 4103.1  | 3340.1   | 3020.7   | 3248.6   | 3781.1   | 1821.0        | 3248.6     | 1.8         |
| 202626_s_at  | LYN         | 7.17E-05 | 1575.8     | 1138.0     | 1412.0     | 1569.3      | 2077.9      | 1309.3      | 2237.5      | 3019.9  | 2903.3  | 3793.7  | 3212.1   | 3549.6   | 3485.4   | 3771.3   | 1569.3        | 3485.4     | 2.2         |
| 210754_s_at  | LYN         | 1.08E-04 | 1638.3     | 1050.0     | 1340.1     | 1509.8      | 1717.7      | 1137.7      | 1803.4      | 2661.6  | 2784.5  | 3427.9  | 2682.1   | 3211.9   | 3080.9   | 3256.7   | 1509.8        | 3080.9     | 2.0         |
| 218561_s_at  | LYRM4       | 1.91E-03 | 756.1      | 552.5      | 657.7      | 630.5       | 733.4       | 713.1       | 851.6       | 910.3   | 1036.4  | 2098.6  | 1004.8   | 1122.2   | 1241.9   | 1489.6   | 713.1         | 1122.2     | 1.6         |
| 226748_at    | LYSMD2      | 3.84E-04 | 353.1      | 335.0      | 380.9      | 467.8       | 518.7       | 491.1       | 504.8       | 614.2   | 665.1   | 621.3   | 795.6    | 690.5    | 665.2    | 776.9    | 467.8         | 665.2      | 1.4         |
| 218559_s_at  | MAFB        | 4.28E-04 | 5460.9     | 4726.6     | 4076.5     | 3549.6      | 5270.0      | 2784.0      | 3834.1      | 7028.3  | 8001.7  | 8362.3  | 7001.2   | 7933.7   | 7097.5   | 7741.1   | 4076.5        | 7741.1     | 1.9         |
| 222670_s_at  | MAFB        | 1.12E-03 | 2120.9     | 1593.6     | 1351.8     | 1106.2      | 1535.8      | 816.7       | 1161.6      | 2276.1  | 2808.4  | 3495.4  | 2321.5   | 2875.9   | 2597.4   | 2628.9   | 1351.8        | 2628.9     | 1.9         |
| 220302_at    | MAK         | 1.74E-04 | 56.3       | 87.8       | 70.2       | 70.0        | 86.4        | 61.7        | 69.7        | 93.8    | 190.7   | 225.2   | 136.2    | 135.0    | 160.7    | 190.4    | 70.0          | 160.7      | 2.3         |
| 235106_at    | MAML2       | 5.96E-04 | 74.2       | 79.3       | 104.9      | 85.2        | 147.8       | 138.6       | 139.8       | 158.8   | 153.7   | 339.6   | 211.7    | 205.5    | 248.9    | 210.2    | 104.9         | 210.2      | 2.0         |
| 235457_at    | MAML2       | 5.71E-04 | 173.3      | 262.9      | 317.2      | 291.4       | 377.9       | 399.2       | 339.9       | 481.1   | 603.5   | 939.0   | 621.0    | 548.1    | 568.7    | 574.2    | 317.2         | 574.2      | 1.8         |
| 205088_at    | MAMLD1      | 2.39E-04 | 35.0       | 24.9       | 32.9       | 34.5        | 49.3        | 32.2        | 43.9        | 51.4    | 50.5    | 94.8    | 92.8     | 95.9     | 52.3     | 121.7    | 34.5          | 92.8       | 2.7         |
| 202655_at    | MANF        | 1.66E-03 | 1294.0     | 1126.5     | 917.8      | 1163.1      | 1013.8      | 791.5       | 1112.7      | 1544.2  | 1442.3  | 1429.5  | 1737.5   | 1452.2   | 1469.5   | 1521.7   | 1112.7        | 1469.5     | 1.3         |
| 224378_x_at  | MAP1LC3A    | 8.07E-03 | 69.7       | 44.4       | 64.2       | 65.4        | 60.3        | 63.8        | 67.8        | 88.0    | 59.6    | 139.7   | 71.5     | 136.4    | 147.8    | 82.7     | 64.2          | 88.0       | 1.4         |
| 227219_x_at  | MAP1LC3A    | 2.79E-03 | 59.1       | 49.9       | 48.6       | 56.5        | 65.0        | 57.8        | 67.7        | 81.2    | 60.8    | 108.2   | 82.9     | 129.2    | 89.0     | 84.9     | 57.8          | 84.9       | 1.5         |
| 207667_s_at  | MAP2K3      | 2.98E-04 | 104.4      | 76.7       | 143.3      | 148.4       | 153.3       | 124.0       | 157.2       | 149.8   | 123.8   | 249.1   | 190.4    | 251.6    | 236.7    | 256.4    | 143.3         | 236.7      | 1.7         |
| 215498_s_at  | MAP2K3      | 1.00E-03 | 1878.1     | 1961.9     | 2341.2     | 1828.5      | 2488.8      | 2177.9      | 2869.6      | 2792.5  | 3015.7  | 3819.9  | 3215.1   | 3144.7   | 3190.9   | 3494.8   | 2177.9        | 3190.9     | 1.5         |
| 215499_at    | MAP2K3      | 1.12E-03 | 949.9      | 880.4      | 1129.1     | 1059.5      | 1414.7      | 1159.6      | 1592.2      | 1355.0  | 1728.3  | 2077.1  | 1629.3   | 1619.2   | 1864.0   | 2342.3   | 1129.1        | 1728.3     | 1.5         |
| 210284_s_at  | MAP3K7IP2   | 2.10E-03 | 116.0      | 126.7      | 199.6      | 164.5       | 207.3       | 161.8       | 191.4       | 190.7   | 159.6   | 334.9   | 243.7    | 248.9    | 201.4    | 268.9    | 164.5         | 243.7      | 1.5         |
| 205027_s_at  | MAP3K8      | 3.10E-03 | 205.6      | 206.4      | 291.0      | 353.3       | 367.0       | 369.6       | 417.5       | 290.0   | 607.5   | 1141.1  | 608.1    | 549.7    | 542.6    | 697.5    | 353.3         | 607.5      | 1.7         |
| 235421_at    | MAP3K8      | 9.77E-04 | 826.0      | 603.3      | 744.8      | 742.1       | 680.7       | 554.3       | 782.0       | 957.7   | 1434.8  | 2069.6  | 1188.2   | 1114.6   | 1247.7   | 1506.0   | 742.1         | 1247.7     | 1.7         |
| 206571_s_at  | MAP4K4      | 1.30E-03 | 452.7      | 321.6      | 508.4      | 438.4       | 607.8       | 405.5       | 483.3       | 549.6   | 660.8   | 930.9   | 605.7    | 792.3    | 663.7    | 841.9    | 452.7         | 663.7      | 1.5         |
| 202889_x_at  | MAP7        | 1.79E-03 | 51.2       | 53.2       | 77.1       | 92.5        | 72.6        | 84.3        | 50.3        | 66.9    | 82.8    | 125.9   | 113.5    | 86.8     | 128.2    | 88.4     | 72.6          | 88.4       | 1.2         |
| 212497_at    | MAPK1IP1L   | 6.05E-03 | 86.6       | 87.0       | 117.8      | 112.8       | 129.8       | 121.9       | 133.2       | 136.5   | 91.4    | 176.3   | 148.3    | 155.8    | 186.3    | 166.5    | 117.8         | 155.8      | 1.3         |
| 229845_at    | MAPKAP1     | 4.24E-03 | 301.6      | 201.2      | 284.8      | 301.6       | 308.8       | 258.8       | 290.3       | 309.1   | 501.6   | 622.2   | 422.7    | 399.9    | 485.2    | 537.0    | 290.3         | 485.2      | 1.7         |
| 213256_at    | MARCH3      | 1.72E-03 | 146.5      | 114.5      | 116.9      | 108.0       | 192.8       | 101.9       | 151.6       | 228.1   | 143.0   | 253.4   | 209.0    | 227.9    | 156.5    | 263.0    | 116.9         | 227.9      | 1.9         |
| 218582_at    | MARCH5      | 2.65E-03 | 148.4      | 194.4      | 221.0      | 208.6       | 219.7       | 232.6       | 239.3       | 264.2   | 260.4   | 367.6   | 276.1    | 272.3    | 274.4    | 343.7    | 219.7         | 274.4      | 1.2         |
| 230001_at    | MARCH9      | 9.34E-03 | 46.9       | 53.1       | 44.9       | 46.6        | 47.9        | 38.3        | 32.8        | 54.0    | 68.6    | 124.7   | 63.3     | 59.4     | 59.5     | 77.6     | 46.6          | 63.3       | 1.4         |
| 201668_x_at  | MARCKS      | 4.22E-04 | 154.6      | 78.9       | 98.8       | 137.8       | 231.2       | 53.7        | 219.8       | 330.1   | 487.3   | 800.8   | 640.6    | 474.9    | 584.6    | 669.2    | 137.8         | 584.6      | 4.2         |
| 201669_s_at  | MARCKS      | 9.14E-04 | 685.5      | 140.7      | 540.6      | 628.4       | 1702.6      | 257.9       | 2067.2      | 2294.5  | 3079.0  | 5324.5  | 4363.3   | 3673.4   | 3563.6   | 4509.5   | 628.4         | 3673.4     | 5.8         |
| 201670_s_at  | MARCKS      | 2.68E-03 | 3647.7     | 655.7      | 1810.5     | 2448.7      | 5600.4      | 966.4       | 5812.7      | 6921.2  | 8280.1  | 11332.8 | 9624.9   | 8759.8   | 9926.6   | 10789.2  | 2448.7        | 9624.9     | 3.9         |
| 213002_at    | MARCKS      | 3.37E-03 | 7168.1     | 1906.4     | 4007.0     | 5059.9      | 10109.4     | 1839.5      | 10510.8     | 12333.8 | 14986.3 | 17460.5 | 15470.8  | 15254.0  | 15647.6  | 16045.2  | 5059.9        | 15470.8    | 3.1         |
| 225897_at    | MARCKS      | 1.58E-04 | 174.6      | 46.5       | 117.5      | 125.6       | 414.2       | 53.6        | 423.5       | 835.5   | 862.1   | 1723.4  | 1287.5   | 1202.3   | 1110.3   | 1616.0   | 125.6         | 1202.3     | 9.6         |
| 200644_at    | MARCKSL1    | 2.83E-05 | 72.9       | 72.5       | 39.8       | 50.3        | 120.0       | 60.0        | 85.1        | 257.0   | 138.1   | 160.4   | 214.3    | 401.8    | 245.1    | 493.6    | 72.5          | 245.1      | 3.4         |
| 228468_at    | MASTL       | 3.41E-05 | 51.5       | 53.4       | 81.0       | 82.4        | 99.0        | 82.0        | 100.4       | 183.6   | 260.2   | 612.2   | 253.2    | 295.2    | 208.8    | 406.2    | 82.0          | 260.2      | 3.2         |
| 209331_s_at  | MAX         | 3.95E-03 | 1553.6     | 1461.7     | 1667.1     | 1286.6      | 1340.7      | 1417.0      | 1332.0      | 1739.2  | 2042.2  | 2024.9  | 1713.7   | 1814.0   | 1780.0   | 2008.1   | 1417.0        | 1814.0     | 1.3         |
| 214108_at    | MAX         | 8.51E-03 | 114.4      | 84.3       | 141.4      | 138.1       | 152.7       | 116.2       | 153.6       | 118.1   | 124.1   | 265.1   | 202.9    | 187.2    | 145.4    | 200.5    | 138.1         | 187.2      | 1.4         |
| 1558111_at   | MBNL1       | 1.45E-03 | 285.2      | 271.7      | 364.7      | 384.0       | 305.1       | 297.0       | 297.1       | 345.4   | 418.3   | 602.8   | 501.9    | 392.1    | 477.1    | 408.3    | 297.1         | 418.3      | 1.4         |
| 200796_s_at  | MCL1        | 5.44E-03 | 308.7      | 261.3      | 233.5      | 320.9       | 235.0       | 340.3       | 245.2       | 324.9   | 311.8   | 420.9   | 402.9    | 419.0    | 522.0    | 458.4    | 261.3         | 419.0      | 1.6         |
| 200798_x_at  | MCL1        | 5.70E-03 | 405.1      | 525.5      | 585.5      | 493.2       | 528.9       | 641.7       | 610.6       | 617.4   | 799.0   | 1154.9  | 793.6    | 639.0    | 648.1    | 846.8    | 528.9         | 793.6      | 1.5         |
| 214056_at    | MCL1        | 7.67E-03 | 2822.4     | 2902.2     | 2512.7     | 2636.8      | 2413.5      | 2745.4      | 2611.2      | 2852.1  | 3720.7  | 4140.7  | 3558.0   | 3428.1   | 3268.6   | 3961.3   | 2636.8        | 3558.0     | 1.3         |
| 1555465_at   | MCOLN2      | 3.16E-04 | 143.2      | 136.7      | 59.2       | 104.4       | 114.2       | 59.5        | 113.9       | 194.5   | 296.1   | 290.6   | 341.4    | 334.4    | 262.7    | 495.0    | 113.9         | 296.1      | 2.6         |
| 230110_at    | MCOLN2      | 1.24E-05 | 137.9      | 88.6       | 79.9       | 155.7       | 300.9       | 91.3        | 261.8       | 498.8   | 602.0   | 674.2   | 777.3    | 924.6    | 691.8    | 1235.4   | 137.9         | 691.8      | 5.0         |
| 1554730_at   | MCTP1       | 1.02E-03 | 65.3       | 52.8       | 78.3       | 86.5        | 136.7       | 45.2        | 97.4        | 126.4   | 109.4   | 245.3   | 206.8    | 157.9    | 158.6    | 172.8    | 78.3          | 158.6      | 2.0         |
| 220122_at    | MCTP1       | 5.14E-03 | 329.4      | 264.1      | 435.7      | 536.2       | 665.6       | 445.7       | 640.7       | 625.7   | 667.3   | 1479.9  | 964.9    | 643.6    | 782.0    | 885.2    | 445.7         | 782.0      | 1.8         |
| 229021_at    | MCTP2       | 1.69E-03 | 45.5       | 51.2       | 27.8       | 16.9        | 21.5        | 28.2        | 23.3        | 48.2    | 83.7    | 105.5   | 62.2     | 60.6     | 98.0     | 131.7    | 27.8          | 83.7       | 3.0         |
| 217599_s_at  | MDFIC       | 8.47E-03 | 323.4      | 259.7      | 339.7      | 283.1       | 383.8       | 367.0       | 333.1       | 379.0   | 513.6   | 789.0   | 455.7    | 450.5    | 480.0    | 404.1    | 333.1         | 455.7      | 1.4         |
| 239172_x_at  | MDFIC       | 6.39E-03 | 169.0      | 207.7      | 191.6      | 179.9       | 224.1       | 216.1       | 187.0       | 257.4   | 225.9   | 334.0   | 298.5    | 303.4    | 258.1    | 222.3    | 191.6         | 258.1      | 1.3         |
| 223780_s_at  | MED13       | 3.59E-03 | 249.7      | 233.5      | 238.5      | 248.8       | 358.6       | 323.5       | 323.4       | 384.0   | 259.8   | 445.3   | 356.2    | 497.1    | 397.0    | 443.1    | 249.7         | 397.0      | 1.6         |
| 1553993_s_at | MED25       | 7.44E-03 | 101.7      | 127.4      | 139.5      | 121.1       | 137.9       | 151.6       | 124.7       | 176.8   | 163.6   | 203.8   | 155.6    | 198.1    | 153.5    | 157.7    | 127.4         | 163.6      | 1.3         |
| 221598_s_at  | MED27       | 9.38E-03 | 176.6      | 186.5      | 236.5      | 220.9       | 235.1       | 216.3       | 253.2       | 316.3   | 175.2   | 363.1   | 267.4    | 373.0    | 324.9    | 327.6    | 220.9         | 324.9      | 1.5         |
| 51176_at     | MED27       | 5.73E-03 | 312.9      | 324.9      | 353.7      | 331.8       | 395.9       | 346.6       | 404.4       | 495.3   | 338.0   | 552.6   | 379.3    | 540.2    | 554.7    | 554.8    | 346.6         | 540.2      | 1.6         |
| 209199_s_at  | MEF2C       | 7.46E-03 | 88.3       | 66.8       | 112.9      | 108.7       | 98.8        | 95.1        | 109.5       | 113.2   | 107.8   | 192.8   | 157.2    | 145.1    | 88.7     | 232.4    | 98.8          | 145.1      | 1.5         |
| 230011_at    |             |          |            |            |            |             |             |             |             |         |         |         |          |          |          |          |               |            |             |

Supplementary Table S1. Continued.

| ID            | Gene Symbol            | p-value  | VW3_Saline | VW6_Saline | VW7_Saline | VW13_Saline | VW22_Saline | VW23_Saline | VW25_Saline | VW3_LPS | VW6_LPS | VW7_LPS | VW13_LPS | VW22_LPS | VW23_LPS | VW25_LPS | Median_saline | Median_LPS | Fold change |
|---------------|------------------------|----------|------------|------------|------------|-------------|-------------|-------------|-------------|---------|---------|---------|----------|----------|----------|----------|---------------|------------|-------------|
| 206522_at     | MGAM                   | 1.84E-04 | 32.3       | 29.8       | 20.0       | 37.4        | 36.1        | 43.4        | 30.8        | 75.7    | 133.6   | 231.4   | 121.6    | 123.3    | 119.7    | 153.5    | 32.3          | 123.3      | 3.8         |
| 223974_at     | MGC11082               | 1.22E-03 | 54.4       | 33.3       | 44.0       | 38.1        | 44.7        | 36.0        | 40.7        | 77.5    | 45.2    | 64.8    | 52.2     | 78.7     | 75.2     | 98.3     | 40.7          | 75.2       | 1.8         |
| 224507_s_at   | MGC12916               | 8.08E-05 | 76.3       | 86.1       | 58.9       | 42.9        | 78.5        | 35.7        | 64.9        | 189.8   | 160.8   | 325.5   | 204.3    | 255.2    | 116.1    | 329.8    | 64.9          | 204.3      | 3.1         |
| 224508_at     | MGC12916               | 2.18E-05 | 33.9       | 21.1       | 38.4       | 37.4        | 73.4        | 37.4        | 40.6        | 179.2   | 111.5   | 344.0   | 183.5    | 214.6    | 113.3    | 282.7    | 37.4          | 183.5      | 4.9         |
| 210484_s_at   | MGC31957               | 7.64E-03 | 48.8       | 26.2       | 51.6       | 48.8        | 49.5        | 52.4        | 36.9        | 44.8    | 50.8    | 91.9    | 56.6     | 79.5     | 88.4     | 82.7     | 48.8          | 79.5       | 1.6         |
| /// TNFRSF10C |                        |          |            |            |            |             |             |             |             |         |         |         |          |          |          |          |               |            |             |
| 239104_at     | MGC42157               | 2.59E-03 | 117.2      | 143.5      | 172.7      | 183.4       | 189.5       | 133.6       | 180.7       | 177.1   | 168.5   | 291.2   | 260.0    | 234.3    | 180.9    | 231.8    | 172.7         | 231.8      | 1.3         |
| 1565162_s_at  | MGST1                  | 4.11E-03 | 58.8       | 50.6       | 203.8      | 105.3       | 219.6       | 90.2        | 184.1       | 142.4   | 70.5    | 412.7   | 178.2    | 263.4    | 164.3    | 202.7    | 105.3         | 178.2      | 1.7         |
| 224918_x_at   | MGST1                  | 8.91E-03 | 798.2      | 518.0      | 1235.4     | 707.6       | 1323.4      | 540.1       | 1180.2      | 920.4   | 613.8   | 2403.3  | 988.0    | 1880.7   | 1059.6   | 1325.1   | 798.2         | 1059.6     | 1.3         |
| 231736_x_at   | MGST1                  | 7.98E-03 | 665.2      | 376.2      | 971.8      | 511.0       | 1031.7      | 447.5       | 844.2       | 816.4   | 397.2   | 1859.8  | 701.2    | 1468.1   | 833.7    | 1034.5   | 665.2         | 833.7      | 1.3         |
| 1569057_s_at  | MIA3                   | 2.34E-03 | 97.3       | 100.3      | 153.6      | 130.6       | 139.0       | 152.3       | 140.5       | 167.8   | 119.9   | 236.5   | 196.4    | 221.7    | 192.9    | 168.0    | 139.0         | 192.9      | 1.4         |
| 212305_s_at   | MIA3                   | 3.37E-03 | 196.7      | 199.5      | 244.6      | 244.6       | 242.0       | 247.5       | 218.0       | 316.5   | 223.6   | 332.7   | 283.7    | 385.1    | 343.5    | 359.6    | 242.0         | 332.7      | 1.4         |
| 227168_at     | MIAT                   | 5.27E-03 | 117.1      | 67.9       | 97.6       | 143.1       | 88.1        | 75.7        | 77.1        | 117.5   | 94.0    | 130.3   | 181.3    | 133.1    | 106.3    | 117.7    | 88.1          | 117.7      | 1.3         |
| 205905_s_at   | MICA                   | 4.63E-03 | 189.1      | 153.3      | 229.3      | 186.3       | 230.5       | 265.5       | 171.3       | 248.1   | 162.5   | 305.7   | 244.5    | 384.4    | 350.3    | 242.5    | 189.1         | 248.1      | 1.3         |
| /// MICB      |                        |          |            |            |            |             |             |             |             |         |         |         |          |          |          |          |               |            |             |
| 221779_at     | MICALL1                | 4.07E-05 | 180.5      | 130.7      | 156.5      | 209.7       | 241.7       | 162.2       | 274.2       | 425.4   | 541.1   | 747.5   | 427.1    | 654.7    | 615.3    | 819.8    | 180.5         | 615.3      | 3.4         |
| 55081_at      | MICALL1                | 1.15E-05 | 91.8       | 119.4      | 157.2      | 176.8       | 202.8       | 144.5       | 247.4       | 436.9   | 492.0   | 731.4   | 400.8    | 660.2    | 577.8    | 740.1    | 157.2         | 577.8      | 3.7         |
| 206860_s_at   | MIOS                   | 3.84E-03 | 283.3      | 279.0      | 387.5      | 346.7       | 400.1       | 306.3       | 418.7       | 456.8   | 363.3   | 510.6   | 508.8    | 497.0    | 451.7    | 454.2    | 346.7         | 456.8      | 1.3         |
| 229437_at     | MIR155HG               | 1.77E-04 | 171.5      | 81.2       | 198.4      | 192.2       | 258.5       | 144.2       | 252.9       | 416.8   | 535.0   | 1441.0  | 574.0    | 513.5    | 549.7    | 867.8    | 192.2         | 549.7      | 2.9         |
| 224784_at     | MLLT6                  | 1.96E-04 | 291.9      | 271.8      | 357.5      | 364.0       | 422.5       | 354.5       | 453.5       | 427.7   | 466.6   | 602.6   | 552.6    | 616.9    | 493.2    | 703.4    | 357.5         | 552.6      | 1.5         |
| 225628_s_at   | MLLT6                  | 2.47E-04 | 101.2      | 69.8       | 138.3      | 138.6       | 132.8       | 113.3       | 139.9       | 148.4   | 106.1   | 277.2   | 189.9    | 249.1    | 210.5    | 230.4    | 132.8         | 210.5      | 1.6         |
| 236347_at     | MMAA                   | 9.97E-04 | 427.9      | 476.6      | 507.8      | 544.6       | 566.4       | 462.6       | 526.0       | 621.9   | 724.9   | 1029.2  | 784.0    | 666.1    | 759.7    | 866.4    | 507.8         | 759.7      | 1.5         |
| 239852_at     | MMAA                   | 4.01E-03 | 41.8       | 68.7       | 79.5       | 54.4        | 75.1        | 69.1        | 68.9        | 87.1    | 86.8    | 129.8   | 99.9     | 84.4     | 94.2     | 90.8     | 68.9          | 90.8       | 1.3         |
| 205680_at     | MMP10                  | 2.45E-04 | 69.5       | 101.7      | 24.8       | 52.8        | 52.1        | 30.8        | 47.2        | 315.4   | 278.7   | 297.2   | 118.0    | 170.7    | 133.0    | 386.6    | 52.1          | 278.7      | 5.3         |
| 160020_at     | MMP14                  | 5.84E-04 | 182.3      | 126.5      | 162.8      | 225.2       | 159.4       | 126.1       | 223.2       | 227.0   | 263.6   | 451.7   | 365.0    | 337.4    | 402.5    | 492.7    | 162.8         | 365.0      | 2.2         |
| 202827_s_at   | MMP14                  | 1.53E-03 | 106.0      | 89.1       | 68.1       | 107.0       | 78.8        | 70.5        | 105.8       | 120.2   | 124.5   | 192.2   | 189.9    | 194.9    | 184.0    | 214.2    | 89.1          | 189.9      | 2.1         |
| 202828_s_at   | MMP14                  | 1.95E-04 | 98.1       | 62.6       | 106.1      | 132.9       | 109.5       | 70.7        | 145.7       | 151.0   | 131.8   | 308.2   | 235.5    | 227.2    | 236.7    | 302.2    | 106.1         | 235.5      | 2.2         |
| 204575_s_at   | MMP19                  | 1.60E-03 | 522.8      | 501.6      | 448.6      | 513.8       | 578.2       | 495.4       | 594.9       | 781.4   | 674.2   | 648.0   | 642.3    | 764.1    | 639.2    | 747.3    | 513.8         | 674.2      | 1.3         |
| 204259_at     | MMP7                   | 4.14E-03 | 49.2       | 34.2       | 56.1       | 37.3        | 43.6        | 43.3        | 55.5        | 81.0    | 268.5   | 492.6   | 76.7     | 90.8     | 74.3     | 126.2    | 43.6          | 90.8       | 2.1         |
| 224277_at     | MOP-1                  | 8.00E-03 | 144.8      | 143.8      | 187.8      | 137.2       | 205.5       | 125.2       | 164.3       | 221.6   | 300.2   | 749.1   | 384.6    | 201.9    | 178.8    | 262.7    | 144.8         | 262.7      | 1.8         |
| 223849_s_at   | MOV10                  | 2.43E-04 | 232.8      | 249.6      | 323.1      | 309.4       | 230.7       | 261.3       | 240.8       | 335.4   | 445.6   | 590.2   | 435.6    | 518.2    | 528.0    | 552.5    | 249.6         | 518.2      | 2.1         |
| 233917_s_at   | MOV10                  | 6.84E-04 | 85.1       | 85.9       | 127.3      | 139.8       | 89.6        | 108.4       | 109.0       | 127.1   | 163.4   | 230.3   | 175.1    | 254.6    | 235.8    | 211.7    | 108.4         | 211.7      | 2.0         |
| 210087_s_at   | MPZL1                  | 9.33E-04 | 137.0      | 138.0      | 174.8      | 145.8       | 161.5       | 134.1       | 142.7       | 240.5   | 171.0   | 255.7   | 222.7    | 215.7    | 195.4    | 194.4    | 142.7         | 215.7      | 1.5         |
| 206538_at     | MIRAS                  | 5.57E-04 | 317.6      | 201.1      | 327.4      | 265.9       | 234.8       | 180.5       | 216.0       | 390.2   | 354.8   | 582.5   | 369.4    | 445.2    | 400.6    | 401.6    | 234.8         | 400.6      | 1.7         |
| 225185_at     | MIRAS                  | 1.53E-03 | 542.0      | 352.9      | 568.1      | 504.7       | 508.3       | 331.0       | 477.7       | 690.0   | 593.6   | 937.5   | 642.4    | 676.4    | 665.3    | 688.3    | 504.7         | 676.4      | 1.3         |
| 219648_at     | MREG                   | 4.68E-04 | 615.2      | 235.7      | 403.8      | 458.4       | 836.7       | 187.6       | 930.9       | 1353.5  | 1314.1  | 2324.3  | 1967.8   | 1902.9   | 1927.4   | 1953.7   | 458.4         | 1927.4     | 4.2         |
| 232682_at     | MREG                   | 1.18E-04 | 23.8       | 21.6       | 19.1       | 25.1        | 34.3        | 11.8        | 35.0        | 79.9    | 54.1    | 132.0   | 93.8     | 92.4     | 76.3     | 79.7     | 23.8          | 79.9       | 3.4         |
| 225201_s_at   | MRPL14                 | 2.93E-04 | 391.9      | 309.7      | 347.7      | 351.0       | 432.5       | 290.0       | 397.3       | 563.3   | 558.9   | 679.2   | 497.5    | 658.5    | 653.0    | 720.5    | 351.0         | 653.0      | 1.9         |
| 222216_s_at   | MRPL17                 | 2.46E-03 | 566.1      | 446.7      | 456.6      | 471.0       | 427.8       | 456.4       | 406.4       | 688.7   | 647.0   | 618.3   | 528.7    | 702.9    | 680.9    | 608.4    | 456.4         | 647.0      | 1.4         |
| 216336_x_at   | MT1E /// MT1H /// MT1M | 5.58E-03 | 254.9      | 235.1      | 968.3      | 738.9       | 561.6       | 760.2       | 443.3       | 475.6   | 757.5   | 1513.8  | 859.5    | 966.9    | 856.0    | 1100.8   | 561.6         | 859.5      | 1.5         |
| 205322_s_at   | MTF1                   | 1.20E-04 | 294.5      | 147.5      | 277.1      | 274.3       | 362.1       | 247.5       | 406.5       | 477.5   | 483.9   | 675.3   | 580.6    | 602.8    | 779.0    | 776.2    | 277.1         | 602.8      | 2.2         |
| 205323_s_at   | MTF1                   | 6.72E-05 | 765.8      | 466.7      | 560.6      | 551.5       | 833.6       | 547.6       | 850.4       | 1228.6  | 1134.3  | 1389.5  | 1360.8   | 1409.3   | 1482.5   | 1733.5   | 560.6         | 1389.5     | 2.5         |
| 227150_at     | MTF1                   | 2.42E-04 | 657.4      | 499.0      | 668.5      | 751.2       | 1196.8      | 682.7       | 1063.9      | 1306.3  | 1411.6  | 1724.5  | 1897.2   | 1665.1   | 1835.2   | 1723.2   | 682.7         | 1723.2     | 2.5         |
| 201761_at     | MTHFD2                 | 4.59E-03 | 1433.3     | 968.6      | 1281.5     | 1382.8      | 1765.7      | 973.4       | 2382.3      | 1824.8  | 2451.2  | 3964.0  | 2649.5   | 2173.2   | 2428.0   | 2876.2   | 1382.8        | 2451.2     | 1.8         |
| 1556034_s_at  | MTMR11                 | 2.70E-03 | 445.9      | 505.0      | 496.0      | 389.0       | 646.4       | 537.9       | 528.3       | 550.6   | 629.0   | 684.2   | 488.6    | 781.2    | 753.4    | 736.6    | 505.0         | 684.2      | 1.4         |
| 205076_s_at   | MTMR11                 | 5.33E-03 | 131.3      | 194.1      | 193.2      | 138.6       | 239.1       | 208.6       | 206.8       | 165.5   | 246.9   | 320.5   | 195.4    | 294.0    | 248.7    | 246.1    | 194.1         | 246.9      | 1.3         |
| 203037_s_at   | MTSS1                  | 4.00E-03 | 37.9       | 34.7       | 46.8       | 52.6        | 47.0        | 53.2        | 43.5        | 64.0    | 61.8    | 70.3    | 69.7     | 106.5    | 52.3     | 74.6     | 46.8          | 69.7       | 1.5         |
| 226856_at     | MUSTN1                 | 2.25E-03 | 126.5      | 115.3      | 143.8      | 147.5       | 120.8       | 134.0       | 120.6       | 171.3   | 168.8   | 275.5   | 165.8    | 265.0    | 209.2    | 275.8    | 126.5         | 209.2      | 1.7         |
| 202086_at     | MX1                    | 9.12E-05 | 1551.8     | 1868.9     | 956.5      | 1101.8      | 899.1       | 691.2       | 955.1       | 2969.0  | 4121.4  | 4489.1  | 3893.0   | 4540.8   | 3707.1   | 5051.1   | 956.5         | 4121.4     | 4.3         |
| 204994_at     | MX2                    | 7.57E-06 | 295.3      | 360.7      | 303.0      | 275.7       | 330.4       | 281.1       | 238.1       | 818.3   | 1104.7  | 1419.4  | 922.2    | 1143.8   | 895.2    | 1236.9   | 295.3         | 1104.7     | 3.7         |
| 206877_at     | MXD1                   | 6.44E-05 | 137.1      | 124.0      | 121.7      | 183.4       | 190.6       | 120.4       | 180.4       | 321.8   | 406.1   | 564.4   | 335.1    | 658.8    | 559.7    | 821.7    | 137.1         | 559.7      | 4.1         |
| 226275_at     | MXD1                   | 1.07E-04 | 526.7      | 561.3      | 415.7      | 730.2       | 744.9       | 463.6       | 768.9       | 862.9   | 1372.5  | 1462.7  | 1343.8   | 1507.0   | 1256.0   | 2148.4   | 561.3         | 1372.5     | 2.4         |
| 228846_at     | MXD1                   | 5.69E-05 | 537.3      | 687.7      | 493.1      | 697.8       | 895.1       | 586.3       | 844.9       | 1074.7  | 2377.6  | 2784.9  | 1954.1   | 2101.9   | 1974.7   | 3013.5   | 687.7         | 2101.9     | 3.1         |
| 202431_s_at   | MYC                    | 3.13E-03 | 300.7      | 173.8      | 322.0      | 279.6       | 219.3       | 217.0       | 325.6       | 569.3   | 246.3   | 318.7   | 503.3    | 600.8    | 385.9    | 587.8    | 279.6         | 503.3      | 1.8         |
| 201976_s_at   | MYO10                  | 1.18E-04 | 15.8       | 40.8       | 66.8       | 58.7        | 49.0        | 26.2        | 34.1        | 53.2    | 63.7    | 206.4   | 119.3    | 133.6    | 50.3     | 99.4     | 40.8          | 99.4       | 2.4         |
| 216222_s_at   | MYO10                  | 3.28E-03 | 53.2       | 44.5       | 73.3       | 73.5        | 60.6        | 30.0        | 51.0        | 61.1    | 66.8    | 123.9   | 81.8     | 103.0    | 55.9     | 73.0     | 53.2          | 73.0       | 1.4         |
| 227799_at     | MYO1G                  | 1.10E-03 | 75.3       | 49.8       | 90.7       | 118.7       | 93.5        | 75.5        | 108.5       | 124.0   | 98.4    | 193.2   | 159.7    | 262.2    | 344.5    | 237.3    | 90.7          | 193.2      | 2.1         |
| 244654_at     | MYO1G                  | 5.96E-04 | 583.7      | 336.6      | 397.7      | 682.8       | 604.3       | 459.6       | 581.8       | 753.6   | 742.0   | 1154.6  | 1009.0   | 1078.4   | 1028.3   | 1418.6   | 581.8         | 1028.3     | 1.8         |
| 216662_at     | MYO7B                  | 9.57E-04 | 61.1       | 60.4       | 73.3       | 64.8        | 80.0        | 82.0        | 79.2        | 84.6    | 85.6    | 120.1   | 133.6    | 102.4    | 121.8    | 117.6    | 73.3          | 117.6      | 1.6         |
| 201798_s_at   | MYOF                   | 4.68E-03 | 1550.1     | 1356.5     | 1618.6     | 1566.0      | 1486.4      | 1647.2      | 1857.4      | 2042.5  | 2109.1  | 2417.3  | 1944.2   | 1756.4   | 1924.4   | 2328.6   | 1566.0        | 2042.5     | 1.3         |
| 211864_s_at   | MYOF                   | 1.53E-03 | 1386.3     | 1040.1     | 1239.9     | 1145.3      | 1088.5      | 1172.2      | 1306.8      | 1705.0  |         |         |          |          |          |          |               |            |             |

TRANSCRIPTION PROFILES IN ALVEOLAR MACROPHAGES

Supplementary Table S1. Continued.

| ID           | Gene Symbol                    | p-value  | VW3_Saline | VW6_Saline | VW7_Saline | VW13_Saline | VW22_Saline | VW23_Saline | VW25_Saline | VW3_LPS | VW6_LPS | VW7_LPS | VW13_LPS | VW22_LPS | VW23_LPS | VW25_LPS | Median_saline | Median_LPS | Fold change |
|--------------|--------------------------------|----------|------------|------------|------------|-------------|-------------|-------------|-------------|---------|---------|---------|----------|----------|----------|----------|---------------|------------|-------------|
| 208047_s_at  | NAB1                           | 8.02E-03 | 51.8       | 42.5       | 85.3       | 91.5        | 99.7        | 89.0        | 97.6        | 107.0   | 69.1    | 157.6   | 127.4    | 118.6    | 101.8    | 109.3    | 89.0          | 109.3      | 1.2         |
| 209272_at    | NAB1                           | 7.45E-03 | 640.3      | 727.9      | 982.0      | 859.5       | 1145.2      | 1083.8      | 1017.9      | 1016.7  | 1036.5  | 1520.6  | 1284.7   | 1251.9   | 1127.7   | 1343.0   | 982.0         | 1251.9     | 1.3         |
| 211139_s_at  | NAB1                           | 3.26E-04 | 451.1      | 359.3      | 398.7      | 425.9       | 483.2       | 376.6       | 419.1       | 625.7   | 512.5   | 684.9   | 594.8    | 734.4    | 710.8    | 706.3    | 419.1         | 684.9      | 1.6         |
| 208917_x_at  | NADK                           | 1.69E-03 | 144.2      | 122.1      | 180.5      | 164.8       | 149.7       | 113.6       | 165.7       | 180.8   | 179.9   | 272.4   | 203.6    | 282.2    | 237.4    | 248.8    | 149.7         | 237.4      | 1.6         |
| 208918_s_at  | NADK                           | 1.84E-04 | 1604.9     | 1562.2     | 1533.0     | 1604.0      | 1938.2      | 1269.6      | 1588.5      | 2112.7  | 3249.3  | 3456.0  | 2787.5   | 3219.2   | 2730.4   | 3426.9   | 1588.5        | 3219.2     | 2.0         |
| 213607_x_at  | NADK                           | 3.10E-03 | 292.2      | 215.2      | 259.4      | 238.1       | 231.6       | 174.2       | 251.0       | 278.5   | 348.8   | 500.8   | 355.9    | 511.1    | 469.1    | 530.0    | 238.1         | 469.1      | 2.0         |
| 213613_s_at  | NADK                           | 2.98E-04 | 223.5      | 192.9      | 190.0      | 195.6       | 222.5       | 163.0       | 197.4       | 272.8   | 322.8   | 451.0   | 361.6    | 469.0    | 357.8    | 420.6    | 195.6         | 361.6      | 1.8         |
| 215159_s_at  | NADK                           | 2.70E-03 | 122.7      | 92.6       | 152.3      | 121.8       | 117.0       | 98.7        | 134.3       | 160.9   | 116.0   | 203.7   | 170.7    | 250.1    | 214.8    | 208.1    | 121.8         | 203.7      | 1.7         |
| 1555167_s_at | NAMPT                          | 1.81E-04 | 2254.9     | 1509.2     | 1566.2     | 1813.8      | 3077.8      | 1860.5      | 3281.3      | 3737.0  | 5043.2  | 6382.9  | 4355.9   | 6155.7   | 5930.9   | 6460.8   | 1860.5        | 5930.9     | 3.2         |
| 217738_at    | NAMPT                          | 8.15E-04 | 1169.4     | 808.3      | 1307.8     | 1216.1      | 1939.8      | 1419.5      | 2366.1      | 1865.6  | 2831.7  | 4074.5  | 2687.3   | 2940.8   | 2938.8   | 3618.6   | 1307.8        | 2938.8     | 2.2         |
| 217739_s_at  | NAMPT                          | 3.14E-03 | 3339.4     | 2630.1     | 3566.4     | 3663.4      | 5245.9      | 4064.1      | 6100.5      | 4269.9  | 6565.8  | 8539.1  | 6188.0   | 6360.2   | 7327.9   | 8025.3   | 3663.4        | 6565.8     | 1.8         |
| 243296_at    | NAMPT                          | 1.46E-04 | 96.2       | 64.2       | 110.5      | 68.1        | 144.1       | 98.4        | 92.2        | 161.0   | 275.7   | 741.2   | 186.4    | 432.3    | 320.3    | 308.3    | 96.2          | 308.3      | 3.2         |
| 202905_x_at  | NBN                            | 7.13E-05 | 1860.2     | 1129.3     | 1561.8     | 1533.1      | 2539.1      | 1365.2      | 2300.3      | 4036.2  | 5990.0  | 8306.0  | 4551.8   | 5632.8   | 5335.1   | 6789.6   | 1561.8        | 5632.8     | 3.6         |
| 202906_s_at  | NBN                            | 6.44E-05 | 768.7      | 513.7      | 826.6      | 796.2       | 1219.9      | 698.9       | 1309.6      | 2115.0  | 3355.4  | 5762.9  | 2632.5   | 3122.9   | 2943.5   | 3725.4   | 796.2         | 3122.9     | 3.9         |
| 202907_s_at  | NBN                            | 6.71E-04 | 1461.7     | 1063.1     | 1868.7     | 1638.6      | 2606.5      | 1768.1      | 3420.8      | 2718.5  | 4653.7  | 7230.5  | 4760.5   | 4059.7   | 4297.1   | 5578.4   | 1768.1        | 4653.7     | 2.6         |
| 217299_x_at  | NBN                            | 1.37E-04 | 546.2      | 304.1      | 591.7      | 567.2       | 839.2       | 491.6       | 913.0       | 1376.5  | 2388.7  | 4271.0  | 1846.1   | 2036.1   | 2098.2   | 2643.0   | 567.2         | 2098.2     | 3.7         |
| 40640_at     | NCAPH2                         | 2.44E-03 | 591.4      | 531.3      | 578.5      | 603.1       | 694.6       | 457.8       | 620.4       | 831.8   | 608.3   | 699.6   | 892.6    | 1178.0   | 863.4    | 957.8    | 591.4         | 863.4      | 1.5         |
| 204961_s_at  | NCF1 ///<br>NCF1B ///<br>NCF1C | 2.57E-05 | 566.0      | 278.8      | 447.2      | 463.3       | 413.4       | 277.3       | 357.3       | 1598.0  | 1397.7  | 2378.7  | 1671.7   | 2274.9   | 2720.1   | 1265.6   | 413.4         | 1671.7     | 4.0         |
| 203315_at    | NCK2                           | 1.94E-03 | 277.0      | 269.0      | 303.3      | 380.2       | 451.7       | 225.5       | 374.5       | 606.3   | 493.1   | 972.2   | 538.0    | 540.0    | 430.8    | 602.0    | 303.3         | 540.0      | 1.8         |
| 209060_x_at  | NCOA3                          | 9.61E-03 | 309.0      | 245.0      | 377.0      | 389.1       | 305.2       | 353.1       | 399.8       | 377.9   | 441.7   | 536.9   | 502.5    | 364.9    | 387.2    | 502.4    | 353.1         | 441.7      | 1.3         |
| 209062_x_at  | NCOA3                          | 3.70E-04 | 102.2      | 93.7       | 118.3      | 108.1       | 107.6       | 89.5        | 117.3       | 148.5   | 125.9   | 235.5   | 157.8    | 168.5    | 150.6    | 181.4    | 107.6         | 157.8      | 1.5         |
| 225344_at    | NCOA7                          | 1.68E-04 | 230.0      | 242.3      | 418.3      | 357.4       | 401.2       | 453.6       | 416.6       | 635.1   | 1115.0  | 1930.3  | 898.9    | 954.6    | 710.9    | 1277.7   | 401.2         | 954.6      | 2.4         |
| 232093_at    | NCRNA00085                     | 1.70E-03 | 43.6       | 54.8       | 54.6       | 34.6        | 46.7        | 44.1        | 45.2        | 73.8    | 67.2    | 111.7   | 72.5     | 71.6     | 58.3     | 61.1     | 45.2          | 71.6       | 1.6         |
| 231303_at    | NCRNA00158                     | 2.66E-03 | 59.4       | 49.6       | 25.2       | 24.8        | 34.0        | 27.0        | 40.8        | 68.1    | 126.6   | 228.5   | 68.1     | 78.0     | 60.1     | 152.2    | 34.0          | 78.0       | 2.3         |
| 1553607_at   | NCRNA00189                     | 2.64E-04 | 27.4       | 12.5       | 36.0       | 42.8        | 69.0        | 35.3        | 38.3        | 62.2    | 35.5    | 151.9   | 151.1    | 97.4     | 122.7    | 78.6     | 36.0          | 97.4       | 2.7         |
| 1553608_a_at | NCRNA00189                     | 5.52E-05 | 140.7      | 56.0       | 143.1      | 169.1       | 253.2       | 155.0       | 208.8       | 380.6   | 184.7   | 625.7   | 445.4    | 586.9    | 657.6    | 395.0    | 155.0         | 445.4      | 2.9         |
| 208093_s_at  | NDEL1                          | 3.61E-03 | 433.3      | 404.7      | 511.6      | 485.4       | 563.0       | 435.9       | 555.7       | 558.3   | 611.4   | 737.3   | 650.9    | 623.5    | 590.1    | 681.1    | 485.4         | 623.5      | 1.3         |
| 206022_at    | NDP                            | 2.88E-05 | 62.8       | 33.1       | 30.4       | 36.2        | 86.4        | 22.3        | 74.3        | 302.1   | 176.7   | 520.7   | 457.5    | 332.1    | 236.8    | 453.1    | 36.2          | 332.1      | 9.2         |
| 1559701_s_at | NDST2                          | 2.46E-03 | 52.7       | 54.3       | 62.7       | 76.3        | 94.3        | 88.2        | 66.7        | 100.0   | 65.7    | 140.2   | 98.8     | 129.7    | 129.0    | 145.0    | 66.7          | 129.0      | 1.9         |
| 203916_at    | NDST2                          | 1.08E-03 | 109.8      | 108.9      | 161.8      | 178.1       | 202.3       | 178.4       | 157.6       | 197.2   | 132.8   | 278.2   | 228.6    | 318.7    | 249.0    | 237.7    | 161.8         | 237.7      | 1.5         |
| 208969_at    | NDUFA9                         | 3.30E-03 | 1435.9     | 1372.7     | 1282.4     | 1295.0      | 1339.3      | 1227.3      | 1193.5      | 1739.7  | 1636.5  | 1775.2  | 1647.8   | 1689.0   | 1578.5   | 1690.4   | 1295.0        | 1689.0     | 1.3         |
| 202150_s_at  | NEDD9                          | 6.82E-03 | 141.6      | 114.2      | 145.1      | 156.8       | 153.2       | 142.3       | 148.7       | 209.8   | 124.0   | 158.2   | 215.9    | 203.9    | 190.3    | 216.1    | 145.1         | 203.9      | 1.4         |
| 218888_s_at  | NETO2                          | 3.37E-03 | 46.8       | 58.2       | 62.7       | 38.2        | 65.0        | 37.1        | 61.1        | 68.1    | 65.5    | 87.1    | 66.7     | 75.3     | 54.5     | 90.1     | 58.2          | 68.1       | 1.2         |
| 232593_at    | NEURL3                         | 2.21E-05 | 67.7       | 45.9       | 50.3       | 46.0        | 42.8        | 37.9        | 59.8        | 146.0   | 135.8   | 285.4   | 149.7    | 148.2    | 132.3    | 183.7    | 46.0          | 148.2      | 3.2         |
| 1552309_a_at | NEXN                           | 6.17E-06 | 218.4      | 200.1      | 252.8      | 215.9       | 166.9       | 135.8       | 174.6       | 768.7   | 1780.5  | 2596.4  | 1347.5   | 1112.6   | 1023.5   | 1831.9   | 200.1         | 1347.5     | 6.7         |
| 226103_at    | NEXN                           | 2.42E-06 | 245.5      | 245.3      | 286.1      | 225.2       | 194.6       | 198.4       | 215.7       | 1153.1  | 1985.4  | 2743.7  | 1530.1   | 1511.7   | 1239.1   | 2310.5   | 225.2         | 1530.1     | 6.8         |
| 204323_x_at  | NF1                            | 4.15E-03 | 110.8      | 84.3       | 122.0      | 112.9       | 164.7       | 144.7       | 158.1       | 185.9   | 148.8   | 198.2   | 181.0    | 186.8    | 180.4    | 179.9    | 122.0         | 180.4      | 1.5         |
| 204325_s_at  | NF1                            | 1.05E-03 | 88.8       | 80.0       | 122.1      | 112.2       | 140.3       | 129.9       | 135.6       | 177.9   | 121.6   | 176.1   | 187.1    | 168.8    | 186.1    | 196.5    | 122.1         | 177.9      | 1.5         |
| 211914_x_at  | NF1                            | 6.53E-03 | 128.1      | 105.7      | 156.1      | 152.4       | 208.5       | 170.6       | 194.2       | 172.9   | 159.0   | 216.4   | 215.6    | 204.7    | 220.5    | 259.3    | 156.1         | 215.6      | 1.4         |
| 208003_s_at  | NFAT5                          | 6.07E-04 | 96.5       | 108.1      | 139.0      | 126.5       | 174.8       | 133.2       | 172.9       | 172.2   | 177.7   | 407.7   | 272.6    | 215.3    | 253.6    | 346.3    | 133.2         | 253.6      | 1.9         |
| 215092_s_at  | NFAT5                          | 8.55E-05 | 152.9      | 131.2      | 169.6      | 176.1       | 278.9       | 162.8       | 248.9       | 305.4   | 294.6   | 541.0   | 356.7    | 440.5    | 431.0    | 511.5    | 169.6         | 431.0      | 2.5         |
| 224984_at    | NFAT5                          | 5.56E-04 | 112.4      | 102.5      | 132.5      | 133.9       | 215.1       | 134.5       | 174.8       | 182.3   | 179.8   | 421.7   | 226.5    | 320.4    | 234.1    | 345.7    | 133.9         | 234.1      | 1.7         |
| 201146_at    | NFE2L2                         | 6.69E-03 | 712.7      | 798.9      | 1086.1     | 986.8       | 1258.4      | 865.7       | 1343.9      | 1164.9  | 1167.6  | 1785.8  | 1462.7   | 1266.4   | 1290.4   | 1492.8   | 986.8         | 1290.4     | 1.3         |
| 204702_s_at  | NFE2L3                         | 1.37E-05 | 92.1       | 68.5       | 118.4      | 194.5       | 115.1       | 74.9        | 115.1       | 283.8   | 142.3   | 408.1   | 466.6    | 252.6    | 231.0    | 354.1    | 115.1         | 283.8      | 2.5         |
| 236471_x_at  | NFE2L3                         | 7.13E-04 | 49.0       | 41.6       | 72.9       | 99.8        | 49.0        | 49.0        | 56.4        | 75.5    | 47.0    | 141.9   | 171.6    | 78.0     | 79.8     | 108.4    | 49.0          | 79.8       | 1.6         |
| 209807_s_at  | NFIX                           | 8.92E-03 | 140.7      | 114.2      | 117.1      | 105.8       | 128.5       | 101.9       | 111.5       | 149.6   | 138.7   | 157.5   | 117.1    | 189.3    | 155.7    | 180.9    | 114.2         | 155.7      | 1.4         |
| 209239_at    | NFKB1                          | 2.52E-05 | 658.9      | 346.5      | 479.8      | 565.5       | 940.1       | 421.8       | 873.4       | 1599.3  | 1895.5  | 2889.2  | 2106.1   | 2995.4   | 2647.5   | 2959.0   | 565.5         | 2647.5     | 4.7         |
| 207535_s_at  | NFKB2                          | 4.54E-05 | 40.6       | 22.9       | 44.6       | 42.4        | 86.0        | 28.0        | 88.9        | 112.0   | 99.4    | 287.6   | 162.4    | 214.0    | 181.5    | 259.9    | 42.4          | 181.5      | 4.3         |
| 209636_at    | NFKB2                          | 8.55E-04 | 52.8       | 43.9       | 50.2       | 69.3        | 83.7        | 46.5        | 84.6        | 79.9    | 80.9    | 152.4   | 117.2    | 169.7    | 213.8    | 193.4    | 52.8          | 152.4      | 2.9         |
| 201502_s_at  | NFKBIA                         | 5.66E-05 | 3048.0     | 2435.4     | 2358.1     | 2338.7      | 4113.8      | 2104.8      | 3631.1      | 5759.0  | 6347.1  | 7559.4  | 6121.2   | 7809.7   | 8091.0   | 8572.4   | 2435.4        | 7559.4     | 3.1         |
| 228388_at    | NFKBIB                         | 4.44E-03 | 133.5      | 95.8       | 148.8      | 124.3       | 131.7       | 97.2        | 137.7       | 164.6   | 151.6   | 229.7   | 151.7    | 152.8    | 202.8    | 202.6    | 131.7         | 164.6      | 1.2         |
| 203927_at    | NFKBIE                         | 1.46E-04 | 342.8      | 222.6      | 307.4      | 297.7       | 421.5       | 243.2       | 391.4       | 524.4   | 438.7   | 665.3   | 559.5    | 814.0    | 748.5    | 712.3    | 307.4         | 665.3      | 2.2         |
| 223217_s_at  | NFKBIZ                         | 1.53E-04 | 1040.1     | 701.2      | 820.1      | 999.7       | 961.3       | 623.0       | 1070.2      | 1582.3  | 2248.1  | 2955.1  | 1927.2   | 2414.1   | 2400.7   | 2968.6   | 961.3         | 2400.7     | 2.5         |
| 223218_s_at  | NFKBIZ                         | 1.18E-04 | 423.4      | 393.7      | 702.8      | 824.7       | 873.4       | 710.9       | 1077.1      | 956.0   | 1654.1  | 2609.9  | 1705.3   | 1749.0   | 1643.6   | 2230.5   | 710.9         | 1705.3     | 2.4         |
| 203045_at    | NINJ1                          | 9.97E-05 | 258.3      | 75.0       | 117.3      | 150.2       | 432.1       | 129.7       | 299.1       | 697.4   | 535.4   | 1045.0  | 595.9    | 1713.3   | 1657.9   | 1022.1   | 150.2         | 1022.1     | 6.8         |
| 209706_at    | NKX3-1                         | 9.17E-04 | 95.4       | 51.3       | 112.1      | 88.0        | 115.5       | 89.9        | 110.4       | 186.8   | 89.4    | 336.8   | 180.1    | 167.2    | 113.1    | 217.4    | 95.4          | 180.1      | 1.9         |
| 225943_at    | NLN                            | 4.07E-04 | 100.0      | 70.2       | 92.4       | 113.2       | 158.3       | 110.9       | 163.9       | 157.6   | 142.6   | 275.2   | 187.7    | 233.7    | 261.8    | 290.0    | 110.9         | 233.7      | 2.1         |
| 226474_at    | NLRC5                          | 6.17E-06 | 133.1      | 137.5      | 214.0      | 241.6       | 217.5       | 132.7       | 240.1       | 306.5   | 335.9   | 636.8   | 557.2    | 465.3    | 352.5    | 609.5    | 214.0         |            |             |

Supplementary Table S1. Continued.

| ID           | Gene Symbol | p-value  | VW3_Saline | VW6_Saline | VW7_Saline | VW13_Saline | VW22_Saline | VW23_Saline | VW25_Saline | VW3_LPS | VW6_LPS | VW7_LPS | VW13_LPS | VW22_LPS | VW23_LPS | VW25_LPS | Median_saline | Median_LPS | Fold change |
|--------------|-------------|----------|------------|------------|------------|-------------|-------------|-------------|-------------|---------|---------|---------|----------|----------|----------|----------|---------------|------------|-------------|
| 214011_s_at  | NOP16       | 9.13E-03 | 424.6      | 292.0      | 428.1      | 410.5       | 417.9       | 393.3       | 493.8       | 504.8   | 370.5   | 585.9   | 544.3    | 462.7    | 596.5    | 555.4    | 417.9         | 544.3      | 1.3         |
| 213462_at    | NPAS2       | 7.74E-04 | 39.6       | 54.0       | 37.0       | 48.3        | 37.2        | 46.1        | 58.1        | 48.4    | 81.4    | 83.3    | 72.2     | 71.3     | 74.2     | 97.7     | 46.1          | 74.2       | 1.6         |
| 210519_s_at  | NQO1        | 2.50E-03 | 121.8      | 208.1      | 90.1       | 166.3       | 163.7       | 135.7       | 167.0       | 140.4   | 336.5   | 153.2   | 221.5    | 206.1    | 185.6    | 231.3    | 163.7         | 206.1      | 1.3         |
| 203920_at    | NR1H3       | 4.91E-03 | 1972.8     | 1192.8     | 1349.1     | 1518.0      | 1707.4      | 952.3       | 1657.0      | 2289.3  | 1617.3  | 2324.0  | 2241.6   | 2707.3   | 2267.7   | 1954.9   | 1518.0        | 2267.7     | 1.5         |
| 202340_x_at  | NR4A1       | 2.51E-04 | 52.9       | 37.6       | 62.0       | 62.8        | 74.9        | 66.6        | 74.3        | 75.3    | 59.7    | 88.8    | 87.8     | 116.2    | 101.4    | 105.2    | 62.8          | 88.8       | 1.4         |
| 204622_x_at  | NR4A2       | 1.65E-03 | 39.7       | 39.9       | 37.4       | 46.3        | 46.8        | 47.1        | 40.1        | 54.3    | 60.9    | 87.4    | 72.6     | 58.8     | 71.5     | 58.1     | 40.1          | 60.9       | 1.5         |
| 207978_s_at  | NR4A3       | 6.44E-05 | 18.3       | 31.2       | 36.5       | 22.4        | 34.5        | 24.9        | 22.6        | 50.6    | 52.9    | 142.3   | 54.2     | 73.1     | 74.5     | 74.9     | 24.9          | 73.1       | 2.9         |
| 209959_at    | NR4A3       | 6.48E-05 | 108.5      | 79.6       | 92.3       | 68.9        | 134.1       | 89.0        | 91.2        | 188.4   | 268.6   | 432.5   | 184.8    | 343.0    | 242.9    | 352.3    | 91.2          | 268.6      | 2.9         |
| 202647_s_at  | NRAS        | 6.78E-03 | 459.8      | 401.7      | 574.1      | 678.1       | 633.3       | 592.2       | 700.4       | 625.3   | 720.0   | 1129.0  | 900.9    | 672.6    | 722.0    | 966.3    | 592.2         | 722.0      | 1.2         |
| 204652_s_at  | NRF1        | 8.36E-03 | 281.1      | 245.0      | 263.2      | 291.5       | 317.3       | 284.3       | 297.9       | 315.4   | 328.4   | 477.0   | 339.8    | 357.1    | 426.0    | 469.7    | 284.3         | 357.1      | 1.3         |
| 219557_s_at  | NRIP3       | 1.27E-03 | 59.3       | 53.6       | 40.5       | 35.4        | 53.0        | 39.1        | 57.4        | 70.9    | 72.5    | 104.8   | 84.6     | 92.5     | 85.1     | 99.5     | 53.0          | 85.1       | 1.6         |
| 222900_at    | NRIP3       | 2.43E-05 | 168.5      | 81.4       | 97.4       | 114.7       | 202.2       | 93.8        | 203.7       | 366.7   | 266.6   | 443.9   | 379.4    | 428.2    | 317.2    | 662.7    | 114.7         | 379.4      | 3.3         |
| 223298_s_at  | NT5C3       | 4.31E-06 | 652.2      | 826.0      | 880.4      | 689.9       | 625.1       | 676.8       | 519.1       | 2363.7  | 4016.6  | 5745.8  | 3458.0   | 3271.4   | 2892.2   | 4136.7   | 676.8         | 3458.0     | 5.1         |
| 233072_at    | NTNG2       | 1.71E-03 | 39.0       | 36.5       | 50.2       | 41.9        | 44.3        | 35.2        | 35.6        | 48.2    | 49.1    | 126.1   | 75.0     | 80.9     | 62.9     | 109.1    | 39.0          | 75.0       | 1.9         |
| 1557071_s_at | NUB1        | 7.94E-04 | 105.8      | 109.0      | 132.6      | 101.1       | 158.9       | 141.0       | 126.3       | 159.7   | 224.1   | 336.7   | 226.6    | 220.6    | 190.2    | 312.6    | 126.3         | 224.1      | 1.8         |
| 1569030_s_at | NUB1        | 9.26E-04 | 232.4      | 195.3      | 219.0      | 266.3       | 222.2       | 189.2       | 234.1       | 314.3   | 563.1   | 881.7   | 550.0    | 332.1    | 391.0    | 654.3    | 222.2         | 550.0      | 2.5         |
| 222512_at    | NUB1        | 2.23E-04 | 2773.1     | 2737.4     | 2676.7     | 2142.9      | 2828.9      | 2539.5      | 2272.6      | 4148.8  | 3862.2  | 4374.8  | 3699.6   | 3986.6   | 3998.5   | 4290.3   | 2676.7        | 3998.5     | 1.5         |
| 234332_at    | NUB1        | 1.12E-04 | 391.1      | 420.2      | 534.2      | 463.7       | 497.1       | 486.0       | 493.6       | 697.2   | 997.3   | 1580.9  | 1226.1   | 812.4    | 835.7    | 1230.6   | 486.0         | 997.3      | 2.1         |
| 225439_at    | NUDCD1      | 2.76E-04 | 73.0       | 83.9       | 125.3      | 115.0       | 135.6       | 117.5       | 139.1       | 180.1   | 159.7   | 278.0   | 190.1    | 221.7    | 164.5    | 227.8    | 117.5         | 190.1      | 1.6         |
| 230462_at    | NUMB        | 1.65E-03 | 70.0       | 62.2       | 75.9       | 69.9        | 88.9        | 82.6        | 83.0        | 94.0    | 84.8    | 125.9   | 90.0     | 119.5    | 112.1    | 102.8    | 75.9          | 102.8      | 1.4         |
| 212691_at    | NUP188      | 5.84E-04 | 167.1      | 137.2      | 173.5      | 189.7       | 201.7       | 159.5       | 229.1       | 243.1   | 206.9   | 336.6   | 238.4    | 317.6    | 309.6    | 349.4    | 173.5         | 309.6      | 1.8         |
| 217601_at    | NUP188      | 1.66E-04 | 92.1       | 99.6       | 129.0      | 131.7       | 117.4       | 127.0       | 156.7       | 164.1   | 141.0   | 292.9   | 211.0    | 203.1    | 222.9    | 252.5    | 127.0         | 211.0      | 1.7         |
| 212247_at    | NUP205      | 7.15E-04 | 222.3      | 237.9      | 252.8      | 261.5       | 284.2       | 257.9       | 293.5       | 345.5   | 336.7   | 436.1   | 344.9    | 362.3    | 394.4    | 412.1    | 257.9         | 362.3      | 1.4         |
| 222382_x_at  | NUP205      | 7.95E-03 | 67.8       | 57.7       | 58.1       | 57.2        | 58.1        | 51.5        | 60.0        | 78.9    | 68.6    | 73.9    | 63.6     | 73.1     | 73.1     | 83.4     | 58.1          | 73.1       | 1.3         |
| 202153_s_at  | NUP62       | 6.56E-05 | 429.9      | 378.2      | 528.0      | 503.1       | 673.9       | 435.0       | 608.8       | 937.8   | 670.0   | 997.2   | 892.7    | 1027.0   | 888.3    | 986.6    | 503.1         | 937.8      | 1.9         |
| 207740_s_at  | NUP62       | 4.03E-03 | 133.4      | 85.8       | 100.4      | 124.1       | 124.8       | 94.5        | 128.7       | 155.3   | 116.9   | 176.1   | 150.1    | 292.0    | 231.2    | 211.5    | 124.1         | 176.1      | 1.4         |
| 236505_at    | NUP62       | 5.34E-04 | 59.6       | 39.5       | 75.3       | 87.1        | 94.5        | 58.4        | 78.4        | 118.9   | 78.4    | 220.4   | 169.6    | 120.1    | 136.8    | 120.9    | 75.3          | 120.9      | 1.6         |
| 203194_s_at  | NUP98       | 3.97E-03 | 219.1      | 174.7      | 220.5      | 244.9       | 266.6       | 229.3       | 286.0       | 346.9   | 238.4   | 348.7   | 326.2    | 376.1    | 309.0    | 292.7    | 229.3         | 326.2      | 1.4         |
| 210793_s_at  | NUP98       | 6.75E-03 | 172.8      | 180.3      | 272.3      | 259.8       | 359.0       | 269.7       | 368.2       | 313.1   | 272.4   | 671.8   | 432.3    | 362.4    | 355.8    | 485.0    | 269.7         | 362.4      | 1.3         |
| 202869_at    | OAS1        | 4.29E-04 | 1133.6     | 594.7      | 1061.0     | 981.2       | 1067.3      | 488.2       | 441.7       | 1559.0  | 992.1   | 2271.4  | 1549.6   | 1876.1   | 747.6    | 1094.6   | 981.2         | 1549.6     | 1.6         |
| 205552_s_at  | OAS1        | 2.23E-04 | 2532.3     | 2443.3     | 2024.3     | 2019.4      | 1986.7      | 1453.2      | 1450.9      | 3563.7  | 4523.1  | 4445.2  | 3456.9   | 4016.5   | 3656.4   | 4251.4   | 2019.4        | 4016.5     | 2.0         |
| 204972_at    | OAS2        | 2.40E-04 | 1324.4     | 1658.9     | 1372.7     | 1318.8      | 1004.8      | 911.4       | 1177.1      | 1813.7  | 2981.5  | 3688.4  | 2700.5   | 2031.7   | 2394.5   | 3608.2   | 1318.8        | 2700.5     | 2.0         |
| 206553_at    | OAS2        | 6.65E-05 | 263.8      | 278.8      | 211.5      | 213.6       | 162.6       | 191.7       | 184.5       | 429.2   | 569.5   | 761.8   | 554.8    | 468.8    | 498.0    | 608.4    | 211.5         | 554.8      | 2.6         |
| 228607_at    | OAS2        | 1.02E-04 | 319.2      | 431.4      | 260.8      | 367.9       | 359.9       | 420.5       | 189.1       | 673.0   | 671.2   | 718.2   | 740.7    | 729.1    | 957.0    | 623.3    | 359.9         | 718.2      | 2.0         |
| 218400_at    | OAS3        | 1.08E-04 | 1502.7     | 1608.5     | 1292.7     | 1266.5      | 994.7       | 831.0       | 906.5       | 2561.7  | 3684.3  | 4269.3  | 3110.4   | 2731.1   | 3079.1   | 4449.7   | 1266.5        | 3110.4     | 2.5         |
| 232666_at    | OAS3        | 2.67E-04 | 45.1       | 35.5       | 35.5       | 45.2        | 34.8        | 35.5        | 39.7        | 60.1    | 67.4    | 101.0   | 77.6     | 93.8     | 81.1     | 96.1     | 35.5          | 81.1       | 2.3         |
| 205660_at    | OASL        | 1.99E-04 | 847.8      | 1235.6     | 405.5      | 495.7       | 570.2       | 569.2       | 606.8       | 1599.4  | 2314.7  | 2734.7  | 1652.7   | 2317.2   | 2011.7   | 2453.1   | 570.2         | 2314.7     | 4.1         |
| 210797_s_at  | OASL        | 2.90E-04 | 588.9      | 783.2      | 292.8      | 431.1       | 339.1       | 359.3       | 400.9       | 1035.5  | 1658.2  | 2034.2  | 1186.9   | 1757.1   | 2062.6   | 1878.5   | 400.9         | 1757.1     | 4.4         |
| 201364_s_at  | OAZ2        | 6.58E-05 | 222.3      | 201.4      | 223.0      | 221.9       | 283.0       | 184.1       | 291.3       | 411.2   | 385.6   | 636.3   | 427.2    | 492.0    | 489.5    | 582.2    | 222.3         | 489.5      | 2.2         |
| 201365_at    | OAZ2        | 5.90E-04 | 1008.5     | 849.7      | 919.1      | 752.9       | 1054.0      | 829.9       | 1187.5      | 1408.2  | 1125.0  | 1352.7  | 1233.6   | 1557.7   | 1392.9   | 1539.7   | 919.1         | 1392.9     | 1.5         |
| 219334_s_at  | OBFC2A      | 2.93E-03 | 95.0       | 126.0      | 202.1      | 203.2       | 205.7       | 188.8       | 246.8       | 163.3   | 158.8   | 467.8   | 307.5    | 315.1    | 253.0    | 300.9    | 202.1         | 300.9      | 1.5         |
| 222872_x_at  | OBFC2A      | 9.86E-03 | 498.2      | 714.4      | 1009.9     | 1004.3      | 1159.1      | 1167.1      | 1259.5      | 792.1   | 1220.7  | 1794.9  | 1351.7   | 1205.2   | 1309.3   | 1534.6   | 1009.9        | 1309.3     | 1.3         |
| 233085_s_at  | OBFC2A      | 8.14E-03 | 1641.7     | 1966.1     | 2191.1     | 2254.0      | 2402.0      | 2412.6      | 2664.7      | 2017.0  | 2913.1  | 3743.7  | 2869.2   | 2713.2   | 2884.0   | 3234.7   | 2254.0        | 2884.0     | 1.3         |
| 230926_s_at  | ODF2L       | 1.71E-03 | 46.6       | 35.5       | 75.2       | 62.7        | 55.8        | 59.6        | 56.0        | 86.1    | 66.8    | 96.3    | 90.1     | 76.6     | 76.3     | 76.2     | 56.0          | 76.6       | 1.4         |
| 219582_at    | OGFRL1      | 1.06E-03 | 363.7      | 589.9      | 530.4      | 519.9       | 689.2       | 596.7       | 516.3       | 863.7   | 903.7   | 1384.3  | 770.6    | 1151.8   | 758.1    | 938.1    | 530.4         | 903.7      | 1.7         |
| 228170_at    | OLIG1       | 9.39E-05 | 15.5       | 17.5       | 8.6        | 9.2         | 5.8         | 7.9         | 13.0        | 78.7    | 51.1    | 78.7    | 50.0     | 129.4    | 44.3     | 68.9     | 9.2           | 68.9       | 7.5         |
| 213825_at    | OLIG2       | 2.19E-04 | 57.3       | 40.1       | 29.0       | 40.1        | 33.3        | 31.9        | 32.3        | 76.4    | 70.4    | 50.7    | 58.8     | 70.4     | 57.8     | 58.7     | 33.3          | 58.8       | 1.8         |
| 229944_at    | OPRK1       | 7.96E-04 | 35.3       | 37.3       | 21.0       | 16.9        | 94.5        | 50.4        | 66.8        | 91.0    | 95.2    | 106.8   | 97.4     | 137.8    | 170.5    | 118.9    | 37.3          | 106.8      | 2.9         |
| 202073_at    | OPTN        | 1.11E-04 | 256.2      | 188.8      | 596.2      | 385.1       | 305.2       | 210.7       | 443.7       | 546.2   | 689.0   | 1620.2  | 1001.5   | 543.9    | 695.1    | 770.1    | 305.2         | 695.1      | 2.3         |
| 202074_s_at  | OPTN        | 3.94E-04 | 2986.5     | 1134.7     | 2091.3     | 1592.4      | 2467.1      | 992.0       | 2596.1      | 4312.6  | 5166.3  | 7250.3  | 4566.2   | 4966.8   | 4996.9   | 6397.7   | 2091.3        | 4996.9     | 2.4         |
| 230170_at    | OSM         | 5.93E-05 | 91.4       | 53.3       | 128.9      | 83.6        | 167.8       | 80.6        | 146.7       | 241.9   | 513.6   | 1278.5  | 243.6    | 831.8    | 469.1    | 1026.4   | 91.4          | 513.6      | 5.6         |
| 238998_x_at  | OTUD1       | 8.56E-03 | 71.0       | 52.8       | 75.8       | 84.3        | 92.6        | 53.5        | 89.6        | 91.7    | 65.5    | 119.4   | 82.3     | 148.7    | 118.0    | 141.3    | 75.8          | 118.0      | 1.6         |
| 203479_s_at  | OTUD4       | 1.51E-03 | 875.2      | 697.2      | 762.3      | 758.0       | 839.3       | 637.5       | 912.7       | 1207.7  | 947.8   | 1308.5  | 873.3    | 1269.4   | 1072.7   | 1249.9   | 762.3         | 1207.7     | 1.6         |
| 238848_at    | OTUD4       | 4.41E-03 | 653.7      | 539.0      | 602.1      | 580.1       | 671.9       | 607.4       | 645.9       | 769.0   | 786.7   | 1134.6  | 828.4    | 800.5    | 764.7    | 880.9    | 607.4         | 800.5      | 1.3         |
| 204088_at    | P2RX4       | 4.59E-04 | 528.1      | 432.5      | 436.0      | 557.2       | 639.9       | 489.5       | 665.4       | 854.0   | 612.9   | 977.6   | 832.1    | 1485.6   | 1283.2   | 1137.7   | 528.1         | 977.6      | 1.9         |
| 207091_at    | P2RX7       | 9.77E-04 | 290.3      | 188.1      | 229.6      | 267.1       | 345.0       | 181.0       | 371.3       | 398.8   | 387.5   | 689.9   | 456.6    | 1034.1   | 938.2    | 842.8    | 267.1         | 689.9      | 2.6         |
| 206277_at    | P2RY2       | 8.01E-05 | 29.7       | 14.2       | 25.4       | 21.2        | 33.8        | 22.5        | 45.5        | 50.0    | 31.7    | 62.4    | 47.4     | 140.6    | 60.7     | 128.9    | 25.4          | 60.7       | 2.4         |
| 208373_s_at  | P2RY6       | 4.85E-03 | 77.4       | 62.8       | 65.2       | 57.6        | 76.3        | 56.9        | 74.9        | 103.5   | 61.5    | 101.5   | 89.2     | 108.6    | 75.5     | 124.0    | 65.2          | 101.5      | 1.6         |
| 202760_s_at  | PALM2-AKAP2 | 9.43E-05 | 362.7      | 107.6      | 128.0      | 175.2       | 239.6       | 339.1       | 1457.7      | 1309.0  | 1832.6  | 2672.1  | 1227.3   | 1443.4   |          |          |               |            |             |



TRANSCRIPTION PROFILES IN ALVEOLAR MACROPHAGES

Supplementary Table S1. Continued.

| ID           | Gene Symbol | p-value  | VW3_Saline | VW6_Saline | VW7_Saline | VW13_Saline | VW22_Saline | VW23_Saline | VW25_Saline | VW3_LPS | VW6_LPS | VW7_LPS | VW13_LPS | VW22_LPS | VW23_LPS | VW25_LPS | Median_saline | Median_LPS | Fold change |
|--------------|-------------|----------|------------|------------|------------|-------------|-------------|-------------|-------------|---------|---------|---------|----------|----------|----------|----------|---------------|------------|-------------|
| 229350_x_at  | PARP10      | 2.05E-04 | 349.7      | 384.3      | 423.6      | 438.2       | 422.4       | 362.0       | 417.9       | 504.5   | 647.5   | 819.2   | 634.0    | 633.2    | 676.9    | 835.8    | 417.9         | 647.5      | 1.5         |
| 220315_at    | PARP11      | 1.15E-03 | 188.8      | 203.2      | 171.6      | 203.7       | 178.3       | 197.9       | 168.6       | 280.7   | 302.8   | 485.3   | 307.4    | 344.7    | 269.4    | 329.9    | 188.8         | 307.4      | 1.6         |
| 229138_at    | PARP11      | 4.93E-03 | 239.6      | 283.0      | 351.3      | 336.9       | 293.3       | 307.7       | 367.7       | 310.4   | 432.7   | 593.2   | 540.8    | 340.6    | 367.6    | 434.3    | 307.7         | 432.7      | 1.4         |
| 218543_s_at  | PARP12      | 5.57E-04 | 1732.3     | 1872.7     | 1631.7     | 1585.0      | 1671.9      | 1576.8      | 1695.7      | 2410.4  | 2395.1  | 2804.8  | 2136.4   | 2512.1   | 2454.9   | 2655.9   | 1671.9        | 2454.9     | 1.5         |
| 224701_at    | PARP14      | 5.15E-04 | 3310.8     | 3491.2     | 3139.5     | 2843.7      | 2906.0      | 2490.3      | 2933.8      | 4227.8  | 5318.6  | 7131.0  | 4788.0   | 4619.6   | 5493.8   | 6253.3   | 2933.8        | 5318.6     | 1.8         |
| 232610_at    | PARP14      | 8.61E-06 | 226.6      | 255.2      | 209.0      | 240.3       | 267.7       | 182.3       | 236.2       | 520.6   | 723.0   | 914.3   | 861.0    | 799.8    | 645.8    | 948.2    | 236.2         | 799.8      | 3.4         |
| 223220_s_at  | PARP9       | 2.11E-04 | 2431.7     | 2914.5     | 2365.4     | 2139.4      | 1926.4      | 2062.4      | 2208.7      | 3249.5  | 4297.8  | 4844.2  | 4001.9   | 3278.3   | 3734.0   | 4461.5   | 2208.7        | 4001.9     | 1.8         |
| 227807_at    | PARP9       | 3.32E-04 | 179.2      | 167.8      | 179.7      | 179.6       | 171.8       | 147.5       | 155.1       | 259.3   | 213.4   | 357.2   | 304.5    | 288.0    | 260.9    | 309.6    | 171.8         | 288.0      | 1.7         |
| 225466_at    | PATL1       | 3.10E-03 | 227.1      | 256.3      | 285.9      | 285.4       | 306.2       | 240.7       | 325.8       | 385.3   | 311.4   | 459.9   | 378.4    | 350.5    | 378.1    | 424.4    | 285.4         | 378.4      | 1.3         |
| 225468_at    | PATL1       | 9.56E-03 | 345.6      | 398.8      | 688.6      | 627.8       | 561.6       | 549.9       | 835.7       | 612.8   | 786.7   | 1315.0  | 803.2    | 650.1    | 635.0    | 942.5    | 561.6         | 786.7      | 1.4         |
| 235234_at    | PATL1       | 4.65E-03 | 1226.4     | 880.8      | 1056.1     | 1210.2      | 978.3       | 797.5       | 1098.6      | 1333.7  | 1368.7  | 1778.0  | 1405.9   | 1298.8   | 1563.3   | 1693.8   | 1056.1        | 1405.9     | 1.3         |
| 235235_s_at  | PATL1       | 1.49E-03 | 1332.5     | 1123.4     | 1145.9     | 1043.5      | 994.8       | 818.2       | 1094.7      | 1493.7  | 1626.4  | 1946.2  | 1381.2   | 1700.9   | 1599.6   | 1866.8   | 1094.7        | 1626.4     | 1.5         |
| 244342_at    | PATL1       | 2.47E-04 | 170.7      | 195.2      | 270.2      | 202.3       | 201.8       | 228.0       | 228.4       | 268.5   | 363.8   | 582.5   | 322.4    | 305.2    | 315.0    | 401.9    | 202.3         | 322.4      | 1.6         |
| 230536_at    | PBX4        | 9.05E-03 | 77.3       | 61.5       | 71.0       | 85.8        | 73.9        | 80.5        | 74.8        | 84.4    | 95.2    | 96.4    | 113.6    | 89.0     | 89.2     | 102.8    | 74.8          | 95.2       | 1.3         |
| 229194_at    | PCGF5       | 4.52E-03 | 294.2      | 430.5      | 607.6      | 517.6       | 568.7       | 653.1       | 587.4       | 542.4   | 781.1   | 1371.6  | 838.4    | 721.3    | 646.9    | 873.6    | 568.7         | 781.1      | 1.4         |
| 229996_s_at  | PCGF5       | 2.95E-04 | 367.0      | 356.2      | 426.5      | 416.1       | 391.7       | 341.1       | 316.2       | 594.2   | 512.8   | 728.3   | 583.8    | 573.3    | 528.8    | 635.7    | 367.0         | 583.8      | 1.6         |
| 213159_at    | PCNX        | 2.89E-04 | 570.1      | 405.5      | 435.9      | 396.9       | 662.8       | 513.3       | 525.4       | 746.5   | 740.4   | 984.0   | 658.4    | 1082.1   | 1209.0   | 1112.9   | 513.3         | 984.0      | 1.9         |
| 206474_at    | PCTK2       | 6.56E-03 | 183.4      | 148.6      | 213.5      | 229.5       | 210.2       | 190.8       | 215.7       | 211.6   | 218.0   | 323.7   | 272.0    | 255.7    | 243.3    | 259.7    | 210.2         | 255.7      | 1.2         |
| 219275_at    | PDCC5       | 3.92E-03 | 1035.8     | 672.1      | 669.0      | 790.7       | 907.5       | 716.8       | 907.5       | 1112.6  | 1134.1  | 1172.0  | 1059.3   | 1054.5   | 1258.4   | 1570.3   | 790.7         | 1134.1     | 1.4         |
| 203708_at    | PDE4B       | 7.13E-05 | 152.2      | 157.9      | 305.4      | 197.7       | 464.1       | 187.1       | 358.8       | 441.4   | 932.1   | 1781.0  | 864.0    | 855.7    | 972.3    | 1187.2   | 197.7         | 932.1      | 4.7         |
| 211302_s_at  | PDE4B       | 2.27E-05 | 136.5      | 120.5      | 222.0      | 166.9       | 296.2       | 151.7       | 229.6       | 358.4   | 721.9   | 1345.0  | 613.7    | 770.9    | 714.3    | 918.4    | 166.9         | 721.9      | 4.3         |
| 204491_at    | PDE4D       | 4.49E-03 | 40.7       | 41.4       | 35.1       | 52.3        | 41.8        | 42.9        | 43.6        | 46.4    | 46.5    | 79.4    | 94.7     | 69.4     | 78.5     | 131.1    | 41.8          | 78.5       | 1.9         |
| 205872_x_at  | PDE4DIP     | 6.95E-03 | 3954.1     | 4032.3     | 2083.7     | 3337.0      | 4474.0      | 1374.7      | 2740.9      | 3951.1  | 5418.3  | 3354.3  | 4578.0   | 5702.5   | 2858.3   | 4365.5   | 3337.0        | 4365.5     | 1.3         |
| 210305_at    | PDE4DIP     | 8.95E-04 | 106.8      | 68.3       | 245.5      | 57.2        | 276.4       | 144.5       | 117.1       | 185.5   | 83.6    | 619.6   | 103.7    | 393.5    | 305.1    | 194.2    | 117.1         | 194.2      | 1.7         |
| 212390_at    | PDE4DIP     | 1.64E-03 | 202.0      | 186.4      | 133.8      | 165.6       | 279.2       | 124.4       | 207.6       | 267.0   | 278.7   | 350.9   | 294.3    | 369.6    | 251.5    | 309.0    | 186.4         | 294.3      | 1.6         |
| 214099_s_at  | PDE4DIP     | 9.80E-03 | 146.3      | 202.9      | 122.2      | 138.1       | 211.0       | 110.6       | 152.0       | 188.9   | 225.2   | 262.7   | 183.5    | 233.2    | 181.8    | 223.3    | 146.3         | 223.3      | 1.5         |
| 214129_at    | PDE4DIP     | 9.51E-03 | 1636.1     | 1757.0     | 1201.8     | 1334.2      | 2079.9      | 1185.5      | 1559.7      | 1917.3  | 1961.4  | 2118.4  | 1929.1   | 2281.9   | 1776.5   | 2093.0   | 1559.7        | 1961.4     | 1.3         |
| 214130_s_at  | PDE4DIP     | 2.15E-03 | 360.0      | 382.3      | 312.1      | 347.3       | 486.5       | 292.1       | 355.6       | 558.9   | 409.2   | 492.6   | 486.4    | 700.8    | 481.1    | 470.9    | 355.6         | 486.4      | 1.4         |
| 232509_at    | PDE4DIP     | 1.69E-03 | 66.7       | 67.0       | 65.9       | 62.2        | 98.2        | 67.7        | 69.7        | 87.3    | 86.3    | 115.7   | 98.9     | 125.1    | 85.7     | 107.8    | 67.0          | 98.9       | 1.5         |
| 205463_s_at  | PDGFRA      | 1.53E-03 | 97.1       | 82.5       | 65.9       | 79.1        | 97.1        | 60.6        | 80.2        | 161.0   | 111.8   | 113.6   | 116.6    | 293.9    | 91.8     | 202.8    | 80.2          | 116.6      | 1.5         |
| 205226_at    | PDGFRL      | 4.47E-06 | 40.7       | 35.3       | 40.5       | 22.2        | 25.4        | 36.1        | 38.2        | 222.4   | 462.0   | 534.5   | 309.1    | 414.3    | 237.9    | 461.5    | 36.1          | 414.3      | 11.5        |
| 203242_s_at  | PDLIM5      | 8.43E-04 | 289.2      | 256.3      | 308.1      | 297.1       | 330.8       | 274.3       | 351.2       | 471.1   | 381.6   | 717.8   | 437.0    | 506.5    | 479.6    | 449.7    | 297.1         | 471.1      | 1.6         |
| 211681_s_at  | PDLIM5      | 3.24E-03 | 456.6      | 280.9      | 347.1      | 384.2       | 474.5       | 367.5       | 492.5       | 524.1   | 435.5   | 662.2   | 524.4    | 625.9    | 834.9    | 710.5    | 384.2         | 625.9      | 1.6         |
| 213684_s_at  | PDLIM5      | 9.83E-04 | 26.7       | 18.5       | 34.2       | 39.4        | 73.2        | 46.9        | 53.3        | 60.9    | 30.6    | 88.0    | 99.2     | 105.9    | 84.8     | 65.3     | 39.4          | 84.8       | 2.2         |
| 216804_s_at  | PDLIM5      | 6.11E-04 | 382.4      | 334.1      | 377.2      | 378.8       | 485.5       | 347.4       | 446.6       | 659.1   | 590.5   | 1037.2  | 620.5    | 652.1    | 687.5    | 677.6    | 378.8         | 659.1      | 1.7         |
| 1569150_x_at | PDLIM7      | 7.41E-04 | 73.5       | 43.1       | 58.3       | 63.7        | 85.1        | 53.9        | 69.2        | 127.5   | 65.8    | 93.5    | 129.2    | 114.5    | 111.2    | 87.9     | 63.7          | 111.2      | 1.7         |
| 214121_x_at  | PDLIM7      | 7.32E-03 | 99.6       | 75.5       | 84.0       | 87.4        | 96.7        | 86.1        | 129.4       | 120.0   | 107.5   | 109.7   | 124.8    | 190.5    | 165.6    | 134.9    | 87.4          | 124.8      | 1.4         |
| 220865_s_at  | PDS51       | 1.02E-04 | 180.5      | 181.2      | 269.6      | 249.4       | 287.1       | 245.7       | 300.9       | 393.6   | 280.0   | 494.0   | 381.8    | 472.2    | 410.0    | 574.4    | 249.4         | 410.0      | 1.6         |
| 218018_at    | PDXK        | 6.13E-03 | 1598.1     | 1325.6     | 1273.4     | 1236.4      | 1274.1      | 928.1       | 1568.3      | 1670.6  | 1779.3  | 1986.4  | 1719.5   | 1765.6   | 1721.2   | 1886.2   | 1274.1        | 1765.6     | 1.4         |
| 200787_s_at  | PEA15       | 5.15E-04 | 927.9      | 800.4      | 778.7      | 904.8       | 1093.3      | 589.7       | 815.5       | 1338.8  | 1051.0  | 1278.3  | 1315.5   | 1716.0   | 1239.8   | 1464.0   | 815.5         | 1315.5     | 1.6         |
| 218319_at    | PELI1       | 5.41E-04 | 153.7      | 189.8      | 201.4      | 191.2       | 196.9       | 210.5       | 166.6       | 236.3   | 609.2   | 1308.7  | 378.4    | 462.4    | 692.9    | 748.6    | 191.2         | 609.2      | 3.2         |
| 232213_at    | PELI1       | 3.61E-03 | 44.5       | 53.4       | 33.9       | 36.7        | 29.1        | 43.5        | 41.5        | 49.6    | 107.0   | 187.4   | 56.7     | 79.1     | 88.9     | 97.2     | 41.5          | 88.9       | 2.1         |
| 232304_at    | PELI1       | 3.16E-04 | 54.4       | 63.7       | 81.5       | 60.7        | 67.1        | 67.7        | 54.3        | 95.9    | 200.3   | 495.4   | 112.9    | 185.9    | 165.8    | 198.4    | 63.7          | 185.9      | 2.9         |
| 202464_s_at  | PFKFB3      | 5.36E-04 | 1584.0     | 2002.6     | 2479.0     | 2010.7      | 2588.4      | 2058.0      | 2939.6      | 2167.1  | 3857.8  | 4307.5  | 2673.8   | 3627.5   | 3136.4   | 5087.5   | 2058.0        | 3627.5     | 1.8         |
| 201037_at    | PFKP        | 1.43E-03 | 1694.5     | 1179.0     | 932.0      | 1062.7      | 653.2       | 631.0       | 647.1       | 2056.5  | 1463.4  | 1955.7  | 1614.2   | 1261.1   | 1331.4   | 1407.7   | 932.0         | 1463.4     | 1.6         |
| 204604_at    | PFTK1       | 2.29E-03 | 587.1      | 597.2      | 865.0      | 755.6       | 751.9       | 859.5       | 920.7       | 940.8   | 990.5   | 1254.1  | 1075.1   | 953.0    | 1008.9   | 1142.5   | 755.6         | 1008.9     | 1.3         |
| 211502_s_at  | PFTK1       | 6.80E-04 | 356.3      | 287.9      | 390.1      | 399.6       | 364.7       | 408.6       | 425.1       | 538.2   | 496.7   | 777.4   | 580.9    | 465.9    | 562.3    | 671.9    | 390.1         | 562.3      | 1.4         |
| 243761_at    | PFTK1       | 1.50E-03 | 30.5       | 12.8       | 30.5       | 24.6        | 48.7        | 30.5        | 97.7        | 62.4    | 51.1    | 285.5   | 82.5     | 78.3     | 90.8     | 180.8    | 30.5          | 82.5       | 2.7         |
| 244321_at    | PGAP1       | 1.61E-03 | 48.9       | 50.0       | 35.8       | 37.5        | 44.2        | 27.1        | 37.1        | 67.4    | 55.3    | 76.2    | 97.0     | 73.1     | 62.7     | 81.5     | 37.5          | 73.1       | 2.0         |
| 204047_s_at  | PHACTR2     | 2.33E-04 | 254.3      | 255.9      | 333.6      | 328.5       | 352.4       | 315.2       | 326.3       | 405.3   | 426.2   | 674.5   | 469.4    | 549.4    | 447.5    | 526.0    | 326.3         | 469.4      | 1.4         |
| 204048_s_at  | PHACTR2     | 8.28E-04 | 244.0      | 327.7      | 412.3      | 401.4       | 425.0       | 411.6       | 419.7       | 587.0   | 539.9   | 844.3   | 729.0    | 555.9    | 558.3    | 651.5    | 411.6         | 587.0      | 1.4         |
| 204049_s_at  | PHACTR2     | 4.68E-03 | 143.5      | 190.7      | 256.1      | 265.7       | 289.4       | 292.0       | 297.7       | 281.0   | 345.7   | 536.2   | 421.9    | 320.2    | 317.5    | 434.6    | 265.7         | 345.7      | 1.3         |
| 244774_at    | PHACTR2     | 9.60E-03 | 97.8       | 124.5      | 262.4      | 229.4       | 229.2       | 220.9       | 217.8       | 183.1   | 229.8   | 600.4   | 280.2    | 220.1    | 302.3    | 299.9    | 220.9         | 280.2      | 1.3         |
| 219235_s_at  | PHACTR4     | 6.24E-04 | 84.6       | 88.5       | 111.3      | 73.6        | 114.4       | 94.7        | 105.7       | 160.3   | 123.2   | 281.3   | 146.0    | 159.5    | 138.9    | 199.9    | 94.7          | 159.5      | 1.7         |
| 226823_at    | PHACTR4     | 1.02E-03 | 403.9      | 377.0      | 468.8      | 503.2       | 523.3       | 351.9       | 492.9       | 627.8   | 707.3   | 1175.8  | 762.8    | 683.2    | 488.3    | 908.5    | 468.8         | 707.3      | 1.5         |
| 221816_s_at  | PHF11       | 2.64E-04 | 793.4      | 708.6      | 890.7      | 821.7       | 887.3       | 816.3       | 796.4       | 1101.9  | 1270.8  | 2087.0  | 1651.8   | 1389.9   | 1243.6   | 1532.0   | 816.3         | 1389.9     | 1.7         |
| 212660_at    | PHF15       | 4.69E-03 | 219.5      | 272.7      | 324.7      | 248.3       | 289.2       | 325.6       | 204.3       | 393.0   | 323.7   | 421.7   | 397.0    | 360.0    | 381.8    | 376.6    | 272.7         | 381.8      | 1.4         |
| 232279_at    | PHF15       | 6.02E-04 | 86.5       | 88.4       | 75.8       | 65.0        | 73.7        | 61.2        | 60.2        | 140.8   | 113.2   | 148.5   | 109.5    | 113.4    | 124.2    | 157.2    | 73.7          | 124.2      | 1.7         |
| 204866_at    | PHF16       |          |            |            |            |             |             |             |             |         |         |         |          |          |          |          |               |            |             |

Supplementary Table S1. Continued.

| ID          | Gene Symbol | p-value  | VW3_Saline | VW6_Saline | VW7_Saline | VW13_Saline | VW22_Saline | VW23_Saline | VW25_Saline | VW3_LPS | VW6_LPS | VW7_LPS | VW13_LPS | VW22_LPS | VW23_LPS | VW25_LPS | Median_saline | Median_LPS | Fold change |
|-------------|-------------|----------|------------|------------|------------|-------------|-------------|-------------|-------------|---------|---------|---------|----------|----------|----------|----------|---------------|------------|-------------|
| 222631_at   | PI4K2B      | 2.97E-05 | 1121.8     | 1097.2     | 1107.9     | 1080.1      | 1420.6      | 1206.9      | 1528.7      | 2280.1  | 2904.3  | 4145.2  | 3011.5   | 2768.7   | 2900.8   | 3682.4   | 1121.8        | 2904.3     | 2.6         |
| 219093_at   | PID1        | 1.39E-04 | 21.1       | 27.7       | 15.5       | 17.3        | 41.2        | 10.4        | 26.8        | 62.1    | 45.9    | 109.1   | 77.6     | 163.5    | 44.0     | 186.9    | 21.1          | 77.6       | 3.7         |
| 237867_s_at | PID1        | 5.75E-03 | 51.3       | 61.8       | 40.5       | 44.6        | 38.6        | 38.9        | 44.9        | 63.5    | 61.8    | 68.5    | 55.7     | 71.0     | 69.2     | 77.3     | 44.6          | 68.5       | 1.5         |
| 205077_s_at | PIGF        | 3.29E-03 | 1349.9     | 1328.0     | 1470.6     | 1406.3      | 1746.6      | 1441.7      | 1540.7      | 1850.7  | 1727.6  | 2064.8  | 1814.9   | 1975.6   | 1899.8   | 1924.6   | 1441.7        | 1899.8     | 1.3         |
| 219238_at   | PIGV        | 3.46E-04 | 149.9      | 168.4      | 219.3      | 203.5       | 268.5       | 250.9       | 243.1       | 359.8   | 300.4   | 499.6   | 339.0    | 359.5    | 473.1    | 371.7    | 219.3         | 359.8      | 1.6         |
| 51146_at    | PIGV        | 2.30E-03 | 69.3       | 74.1       | 100.9      | 83.7        | 137.9       | 129.8       | 121.7       | 148.5   | 100.6   | 227.6   | 181.6    | 167.5    | 203.7    | 157.6    | 100.9         | 167.5      | 1.7         |
| 1554508_at  | PIK3AP1     | 8.59E-05 | 431.2      | 298.2      | 416.9      | 563.7       | 597.5       | 345.7       | 720.5       | 854.0   | 919.2   | 1342.3  | 1102.4   | 1207.3   | 1154.7   | 1369.5   | 431.2         | 1154.7     | 2.7         |
| 226459_at   | PIK3AP1     | 1.20E-03 | 3238.9     | 2403.4     | 3342.7     | 3238.5      | 3926.1      | 2893.8      | 4187.1      | 4205.5  | 5127.5  | 6161.4  | 5018.1   | 4949.4   | 5135.1   | 5912.1   | 3238.9        | 5127.5     | 1.6         |
| 220566_at   | PIK3R5      | 2.46E-03 | 429.8      | 208.2      | 329.8      | 344.8       | 370.1       | 271.9       | 406.3       | 445.1   | 426.4   | 620.9   | 476.8    | 643.3    | 632.7    | 620.6    | 344.8         | 620.6      | 1.8         |
| 227553_at   | PIK3R5      | 3.09E-04 | 981.1      | 697.7      | 738.5      | 773.6       | 1148.6      | 671.7       | 968.5       | 1395.3  | 1253.0  | 1482.7  | 1135.6   | 1597.2   | 1324.4   | 1606.8   | 773.6         | 1395.3     | 1.8         |
| 227645_at   | PIK3R5      | 5.16E-03 | 2389.2     | 1507.3     | 1549.4     | 1568.0      | 2297.8      | 1331.9      | 1873.3      | 2451.1  | 2492.7  | 2957.6  | 2329.5   | 2638.6   | 2772.8   | 3036.2   | 1568.0        | 2638.6     | 1.7         |
| 219788_at   | PILRA       | 1.45E-03 | 1622.9     | 1680.1     | 1275.7     | 1658.0      | 1887.7      | 1251.6      | 1506.3      | 2434.9  | 1991.1  | 2315.5  | 2167.3   | 3216.7   | 2651.0   | 2259.7   | 1622.9        | 2315.5     | 1.4         |
| 204269_at   | PIM2        | 4.60E-04 | 71.2       | 61.8       | 82.3       | 89.2        | 77.2        | 83.3        | 72.4        | 112.8   | 160.5   | 298.6   | 189.8    | 114.9    | 194.3    | 270.4    | 77.2          | 189.8      | 2.5         |
| 224739_at   | PIM3        | 2.09E-03 | 563.3      | 328.0      | 616.8      | 585.1       | 775.2       | 421.5       | 917.5       | 797.8   | 1182.5  | 1386.1  | 895.4    | 1098.8   | 1151.2   | 1450.0   | 585.1         | 1151.2     | 2.0         |
| 207391_s_at | PIP5K1A     | 4.34E-03 | 195.5      | 193.2      | 275.1      | 227.9       | 255.3       | 255.0       | 269.6       | 274.3   | 323.2   | 409.2   | 324.7    | 276.7    | 300.6    | 358.5    | 255.0         | 323.2      | 1.3         |
| 210256_s_at | PIP5K1A     | 6.63E-03 | 207.7      | 191.4      | 219.2      | 213.7       | 269.9       | 292.0       | 270.0       | 300.3   | 231.6   | 382.5   | 337.0    | 393.4    | 293.0    | 350.1    | 219.2         | 337.0      | 1.5         |
| 211205_x_at | PIP5K1A     | 2.46E-03 | 169.9      | 162.9      | 206.3      | 202.3       | 252.4       | 239.9       | 241.8       | 298.4   | 221.6   | 329.1   | 296.9    | 308.6    | 287.6    | 312.8    | 206.3         | 298.4      | 1.4         |
| 207469_s_at | PIR         | 1.39E-03 | 128.9      | 103.5      | 115.8      | 157.8       | 164.8       | 95.0        | 162.1       | 230.0   | 150.1   | 298.4   | 206.6    | 244.7    | 191.1    | 228.8    | 128.9         | 228.8      | 1.8         |
| 201190_s_at | PITPNA      | 2.12E-03 | 629.0      | 674.2      | 585.5      | 639.8       | 801.9       | 680.5       | 824.5       | 933.8   | 831.6   | 1041.7  | 988.6    | 1032.9   | 883.6    | 1046.8   | 674.2         | 988.6      | 1.5         |
| 201191_at   | PITPNA      | 8.12E-03 | 491.1      | 546.9      | 417.6      | 472.7       | 557.5       | 456.5       | 563.3       | 754.1   | 504.7   | 649.5   | 659.1    | 702.9    | 761.0    | 797.7    | 491.1         | 702.9      | 1.4         |
| 201192_s_at | PITPNA      | 1.05E-03 | 1097.9     | 952.1      | 714.3      | 823.5       | 851.3       | 659.4       | 805.6       | 1201.7  | 1660.4  | 1579.1  | 1349.9   | 1613.4   | 1771.7   | 1883.9   | 823.5         | 1613.4     | 2.0         |
| 219584_at   | PLA1A       | 2.53E-04 | 212.6      | 274.6      | 180.8      | 171.7       | 184.0       | 188.2       | 279.7       | 359.0   | 611.3   | 528.3   | 420.6    | 278.5    | 317.6    | 499.4    | 188.2         | 420.6      | 2.2         |
| 210145_at   | PLA2G4A     | 1.08E-05 | 452.9      | 629.2      | 697.9      | 765.4       | 1057.0      | 982.0       | 984.9       | 1540.3  | 3601.8  | 6235.1  | 3718.6   | 3468.4   | 4663.0   | 4631.6   | 765.4         | 3718.6     | 4.9         |
| 206214_at   | PLA2G7      | 4.59E-04 | 502.5      | 196.2      | 366.6      | 350.7       | 379.3       | 88.0        | 1000.7      | 1050.0  | 1106.8  | 3337.8  | 1918.0   | 1149.7   | 1179.7   | 2372.3   | 366.6         | 1179.7     | 3.2         |
| 219014_at   | PLAC8       | 5.68E-04 | 701.1      | 248.5      | 2843.8     | 446.5       | 370.8       | 3363.9      | 2474.1      | 2329.3  | 1039.9  | 6479.2  | 2284.5   | 1433.7   | 4729.0   | 4542.1   | 701.1         | 2329.3     | 3.3         |
| 202924_s_at | PLAGL2      | 6.17E-06 | 181.6      | 115.6      | 177.3      | 138.8       | 213.7       | 143.6       | 210.3       | 407.1   | 371.7   | 548.8   | 396.6    | 588.1    | 544.0    | 581.8    | 177.3         | 544.0      | 3.1         |
| 202925_s_at | PLAGL2      | 2.00E-05 | 132.3      | 85.0       | 193.8      | 150.7       | 227.1       | 120.3       | 224.6       | 319.6   | 334.2   | 609.2   | 418.8    | 474.0    | 448.5    | 551.2    | 150.7         | 448.5      | 3.0         |
| 210845_s_at | PLAUR       | 1.51E-04 | 4561.7     | 3686.9     | 4849.3     | 4979.2      | 5938.5      | 4501.3      | 6396.3      | 6712.9  | 7572.5  | 9588.9  | 8150.6   | 9121.3   | 7956.2   | 9757.9   | 4849.3        | 8150.6     | 1.7         |
| 211924_s_at | PLAUR       | 2.26E-03 | 2337.4     | 1333.5     | 1859.6     | 2321.5      | 1982.1      | 1445.2      | 2625.0      | 2524.2  | 3090.6  | 3937.1  | 3049.3   | 4362.1   | 4337.4   | 4754.0   | 1982.1        | 3937.1     | 2.0         |
| 214866_at   | PLAUR       | 2.86E-04 | 766.1      | 595.2      | 757.3      | 831.6       | 959.0       | 763.8       | 1181.7      | 1172.1  | 1000.1  | 1356.7  | 1153.0   | 1457.8   | 1345.8   | 1590.3   | 766.1         | 1345.8     | 1.8         |
| 177_at      | PLD1        | 8.06E-03 | 189.5      | 160.8      | 209.8      | 216.5       | 237.6       | 202.6       | 245.0       | 258.9   | 171.5   | 342.7   | 259.6    | 346.4    | 232.5    | 343.0    | 209.8         | 259.6      | 1.2         |
| 205203_at   | PLD1        | 1.49E-03 | 365.6      | 309.3      | 437.7      | 375.9       | 448.0       | 358.3       | 517.5       | 470.8   | 434.6   | 705.1   | 476.7    | 596.8    | 467.3    | 693.4    | 375.9         | 476.7      | 1.3         |
| 203470_s_at | PLEK        | 7.60E-04 | 1926.1     | 1033.6     | 1697.5     | 1608.8      | 2761.5      | 1377.1      | 2330.4      | 2620.0  | 2682.1  | 5282.0  | 2971.1   | 3968.3   | 2911.9   | 4274.9   | 1697.5        | 2971.1     | 1.8         |
| 203471_s_at | PLEK        | 6.95E-04 | 1637.0     | 1336.0     | 1957.1     | 1919.2      | 2964.9      | 1736.2      | 2569.0      | 2850.4  | 3249.9  | 5583.0  | 3734.3   | 3708.6   | 3308.3   | 4008.9   | 1919.2        | 3708.6     | 1.9         |
| 219011_at   | PLEKHA4     | 1.16E-04 | 35.8       | 32.4       | 54.6       | 54.8        | 52.1        | 48.1        | 56.9        | 74.5    | 71.6    | 204.1   | 85.0     | 119.2    | 146.9    | 156.8    | 52.1          | 119.2      | 2.3         |
| 218640_s_at | PLEKHF2     | 4.40E-03 | 316.6      | 297.7      | 480.8      | 424.9       | 530.0       | 442.5       | 537.3       | 426.8   | 563.4   | 992.3   | 664.7    | 582.1    | 544.2    | 764.1    | 442.5         | 582.1      | 1.3         |
| 222699_s_at | PLEKHF2     | 1.18E-03 | 183.9      | 206.5      | 287.3      | 248.3       | 337.6       | 257.5       | 320.8       | 256.9   | 376.7   | 665.0   | 455.9    | 444.1    | 331.6    | 533.8    | 257.5         | 444.1      | 1.7         |
| 233986_s_at | PLEKHG2     | 4.50E-03 | 70.3       | 56.5       | 55.6       | 54.1        | 57.4        | 38.5        | 68.6        | 81.4    | 62.8    | 106.4   | 82.3     | 123.6    | 102.8    | 112.8    | 56.5          | 102.8      | 1.8         |
| 218223_s_at | PLEKHO1     | 1.61E-04 | 202.3      | 159.1      | 148.3      | 215.8       | 213.3       | 110.3       | 165.8       | 350.7   | 312.5   | 414.0   | 468.9    | 600.9    | 514.6    | 573.9    | 159.1         | 468.9      | 2.8         |
| 204958_at   | PLK3        | 8.02E-04 | 61.7       | 45.8       | 60.9       | 70.7        | 67.5        | 57.0        | 88.6        | 107.1   | 74.8    | 182.2   | 95.4     | 169.4    | 166.8    | 146.7    | 61.7          | 146.7      | 2.4         |
| 215462_at   | PLK3        | 3.39E-03 | 106.6      | 72.4       | 118.2      | 99.7        | 120.7       | 101.7       | 111.0       | 124.0   | 141.6   | 299.7   | 154.4    | 148.9    | 144.1    | 221.4    | 106.6         | 148.9      | 1.4         |
| 229825_at   | PLK3        | 1.19E-03 | 71.4       | 60.1       | 64.4       | 69.0        | 84.1        | 62.4        | 94.4        | 103.2   | 84.5    | 178.9   | 113.5    | 142.8    | 174.7    | 154.4    | 69.0          | 142.8      | 1.8         |
| 202430_s_at | PLSCR1      | 3.06E-03 | 444.4      | 412.5      | 689.8      | 801.6       | 781.4       | 675.5       | 1044.2      | 669.9   | 932.0   | 1008.0  | 1460.8   | 980.9    | 966.6    | 1378.5   | 689.8         | 980.9      | 1.4         |
| 202446_s_at | PLSCR1      | 2.89E-04 | 2611.0     | 2278.1     | 2545.4     | 2645.8      | 2928.3      | 1967.8      | 2937.1      | 3559.5  | 4511.1  | 5856.1  | 4740.0   | 4209.0   | 4251.3   | 5195.2   | 2611.0        | 4511.1     | 1.7         |
| 1558140_at  | PLXNA1      | 8.82E-03 | 101.7      | 76.9       | 111.0      | 107.8       | 116.1       | 72.6        | 126.2       | 115.2   | 98.6    | 194.1   | 126.4    | 175.9    | 179.2    | 172.5    | 107.8         | 172.5      | 1.6         |
| 221537_at   | PLXNA1      | 6.76E-04 | 184.2      | 124.1      | 185.1      | 177.6       | 229.0       | 114.5       | 209.2       | 269.8   | 284.2   | 430.4   | 266.1    | 330.6    | 322.9    | 374.0    | 184.2         | 322.9      | 1.8         |
| 206470_at   | PLXNC1      | 7.41E-03 | 55.6       | 46.3       | 35.2       | 43.2        | 51.5        | 45.5        | 43.2        | 69.2    | 50.7    | 81.4    | 57.5     | 94.5     | 57.2     | 93.0     | 46.3          | 69.2       | 1.5         |
| 206471_s_at | PLXNC1      | 2.14E-05 | 19.4       | 17.2       | 29.7       | 42.0        | 30.9        | 25.0        | 23.3        | 45.9    | 38.6    | 69.3    | 71.6     | 59.8     | 57.1     | 63.2     | 25.0          | 59.8       | 2.4         |
| 213241_at   | PLXNC1      | 1.59E-04 | 36.8       | 37.2       | 46.1       | 49.2        | 64.0        | 49.0        | 49.5        | 75.1    | 72.3    | 143.6   | 89.5     | 113.8    | 79.4     | 133.6    | 49.0          | 89.5       | 1.8         |
| 204285_s_at | PMAIP1      | 1.32E-04 | 108.2      | 76.3       | 104.7      | 93.6        | 93.8        | 87.1        | 112.8       | 172.7   | 228.6   | 487.2   | 196.1    | 286.9    | 229.5    | 297.2    | 93.8          | 229.5      | 2.4         |
| 206503_x_at | PML         | 6.65E-05 | 152.2      | 114.2      | 149.9      | 157.8       | 142.8       | 124.4       | 163.3       | 264.0   | 246.2   | 451.2   | 274.9    | 329.1    | 373.8    | 381.4    | 149.9         | 329.1      | 2.2         |
| 209640_at   | PML         | 1.45E-05 | 32.4       | 32.9       | 40.9       | 40.3        | 44.8        | 42.1        | 40.8        | 66.0    | 98.1    | 135.2   | 98.3     | 97.5     | 99.8     | 125.1    | 40.8          | 98.3       | 2.4         |
| 210362_x_at | PML         | 1.89E-03 | 55.5       | 27.5       | 50.0       | 63.6        | 49.9        | 38.1        | 57.6        | 62.8    | 63.3    | 96.8    | 79.7     | 114.1    | 102.4    | 106.0    | 50.0          | 96.8       | 1.9         |
| 211013_x_at | PML         | 5.69E-05 | 143.7      | 96.7       | 144.2      | 153.7       | 141.4       | 125.3       | 156.7       | 248.7   | 252.3   | 443.2   | 274.6    | 287.9    | 330.0    | 361.8    | 143.7         | 287.9      | 2.0         |
| 235508_at   | PML         | 1.60E-04 | 330.6      | 265.5      | 277.2      | 284.8       | 296.5       | 294.7       | 271.7       | 494.4   | 775.5   | 1299.8  | 654.5    | 819.9    | 818.9    | 1053.7   | 284.8         | 818.9      | 2.9         |
| 239582_at   | PML         | 2.95E-04 | 61.9       | 59.5       | 49.8       | 58.0        | 60.9        | 68.0        | 66.9        | 114.8   | 85.6    | 168.2   | 102.9    | 133.2    | 134.4    | 142.9    | 60.9          | 133.2      | 2.2         |
| 233177_s_at | PNKD        | 4.91E-04 | 53.3       | 41.3       | 65.9       | 39.2        | 53.6        | 25.6        | 64.4        | 85.5    | 61.7    | 96.8    | 62.2     | 118.4    | 56.9     | 93.1     | 53.3          | 85.5       | 1.6         |
| 1553364_at  | PNPLA1      | 8.45E-04 | 23.3       | 21.4       | 29.4       | 42.1        | 73.9        | 27.5        | 61.6        | 77.4    | 54.1    | 166.6   | 165.5    | 96.9     | 123.5    | 107.9    | 29.4          | 107.9      | 3.7         |
| 223309_x_at | PNPLA8      | 2.66E-03 | 491.6      |            |            |             |             |             |             |         |         |         |          |          |          |          |               |            |             |

TRANSCRIPTION PROFILES IN ALVEOLAR MACROPHAGES

Supplementary Table S1. Continued.

| ID           | Gene Symbol       | p-value  | VW3_Saline | VW6_Saline | VW7_Saline | VW13_Saline | VW22_Saline | VW23_Saline | VW25_Saline | VW3_LPS | VW6_LPS | VW7_LPS | VW13_LPS | VW22_LPS | VW23_LPS | VW25_LPS | Median_saline | Median_LPS | Fold change |
|--------------|-------------------|----------|------------|------------|------------|-------------|-------------|-------------|-------------|---------|---------|---------|----------|----------|----------|----------|---------------|------------|-------------|
| 204148_s_at  | POMZP3<br>/// ZP3 | 2.86E-04 | 126.7      | 138.2      | 211.6      | 120.5       | 342.1       | 108.4       | 403.9       | 560.0   | 212.3   | 1048.2  | 660.9    | 1379.9   | 241.0    | 1008.0   | 138.2         | 660.9      | 4.8         |
| 211771_s_at  | POU2F2            | 2.12E-04 | 105.9      | 66.5       | 72.3       | 80.7        | 102.4       | 81.1        | 83.3        | 141.3   | 110.9   | 146.8   | 155.0    | 172.2    | 198.2    | 164.7    | 81.1          | 155.0      | 1.9         |
| 228343_at    | POU2F2            | 3.41E-05 | 43.1       | 32.0       | 43.5       | 49.2        | 50.3        | 56.8        | 52.0        | 81.1    | 67.1    | 153.0   | 157.2    | 131.3    | 161.8    | 113.2    | 49.2          | 131.3      | 2.7         |
| 229750_at    | POU2F2            | 8.85E-04 | 141.9      | 148.1      | 138.7      | 132.3       | 123.0       | 109.9       | 124.3       | 236.4   | 172.3   | 248.6   | 266.8    | 293.7    | 330.3    | 337.7    | 132.3         | 266.8      | 2.0         |
| 217848_s_at  | PPA1              | 1.08E-03 | 1924.7     | 2037.3     | 1751.5     | 1795.5      | 1615.4      | 1846.4      | 858.1       | 2332.0  | 3289.3  | 3231.6  | 2531.0   | 2691.1   | 2934.8   | 2059.3   | 1795.5        | 2691.1     | 1.5         |
| 223568_s_at  | PPAPDC1B          | 3.64E-03 | 176.0      | 156.3      | 201.7      | 226.7       | 222.4       | 167.3       | 199.2       | 254.7   | 201.7   | 273.2   | 266.3    | 269.2    | 220.8    | 245.5    | 199.2         | 254.7      | 1.3         |
| 242218_at    | PPARD             | 8.43E-03 | 211.0      | 128.3      | 179.2      | 229.3       | 181.1       | 169.7       | 278.2       | 278.3   | 155.0   | 320.2   | 226.7    | 265.4    | 279.3    | 368.7    | 181.1         | 278.3      | 1.5         |
| 214146_s_at  | PPBP              | 1.58E-03 | 256.8      | 42.5       | 17.2       | 31.1        | 38.7        | 24.0        | 104.1       | 335.9   | 50.1    | 53.6    | 77.0     | 74.6     | 54.2     | 295.7    | 38.7          | 74.6       | 1.9         |
| 201489_at    | PPIF              | 2.55E-05 | 1772.6     | 1042.2     | 1625.1     | 1460.5      | 2228.9      | 1414.6      | 2217.8      | 3208.5  | 3018.6  | 4141.9  | 2779.2   | 4814.2   | 3716.4   | 4901.3   | 1625.1        | 3716.4     | 2.3         |
| 201490_s_at  | PPIF              | 1.14E-04 | 693.6      | 402.5      | 620.4      | 541.8       | 708.7       | 426.1       | 728.9       | 1168.1  | 1009.0  | 1693.4  | 996.4    | 2595.6   | 1585.2   | 1812.8   | 620.4         | 1585.2     | 2.6         |
| 235061_at    | PPM1K             | 2.80E-03 | 40.5       | 64.6       | 138.5      | 84.5        | 73.9        | 91.7        | 94.7        | 95.9    | 125.5   | 261.0   | 131.8    | 133.0    | 86.4     | 153.3    | 84.5          | 131.8      | 1.6         |
| 244011_at    | PPM1K             | 6.23E-03 | 57.6       | 66.2       | 66.7       | 57.2        | 48.3        | 54.0        | 52.0        | 68.8    | 102.4   | 116.7   | 61.6     | 73.8     | 63.0     | 78.6     | 57.2          | 73.8       | 1.3         |
| 202014_at    | PPP1R15A          | 3.93E-03 | 185.1      | 107.4      | 193.3      | 213.9       | 198.1       | 142.5       | 199.2       | 209.7   | 197.4   | 448.0   | 239.0    | 533.1    | 510.3    | 464.3    | 193.3         | 448.0      | 2.3         |
| 37028_at     | PPP1R15A          | 3.27E-03 | 214.2      | 125.5      | 224.4      | 244.5       | 196.1       | 149.7       | 228.0       | 255.6   | 277.1   | 543.0   | 273.8    | 546.8    | 598.4    | 491.4    | 214.2         | 491.4      | 2.3         |
| 212750_at    | PPP1R16B          | 4.76E-04 | 43.1       | 33.5       | 33.5       | 58.8        | 57.1        | 35.1        | 32.6        | 75.3    | 59.8    | 55.2    | 147.2    | 69.1     | 68.5     | 69.2     | 35.1          | 69.1       | 2.0         |
| 41577_at     | PPP1R16B          | 1.48E-03 | 37.9       | 38.4       | 37.9       | 50.4        | 45.1        | 40.6        | 49.3        | 48.9    | 49.9    | 53.0    | 103.5    | 69.5     | 64.1     | 68.1     | 40.6          | 64.1       | 1.6         |
| 202313_at    | PPP2R2A           | 2.98E-04 | 274.3      | 311.3      | 376.9      | 350.0       | 410.0       | 396.1       | 419.7       | 499.3   | 684.0   | 816.9   | 584.4    | 569.5    | 556.1    | 753.3    | 376.9         | 584.4      | 1.6         |
| 236492_at    | PPP2R2A           | 6.44E-03 | 72.4       | 91.2       | 77.8       | 87.8        | 74.3        | 72.6        | 81.1        | 88.9    | 131.0   | 144.1   | 105.0    | 88.0     | 89.4     | 112.1    | 77.8          | 105.0      | 1.4         |
| 237636_at    | PPP2R2A           | 3.37E-03 | 133.6      | 123.9      | 147.5      | 145.0       | 126.4       | 141.2       | 142.9       | 157.1   | 185.4   | 303.9   | 263.2    | 192.5    | 154.8    | 238.9    | 141.2         | 192.5      | 1.4         |
| 207000_s_at  | PPP3CC            | 1.11E-03 | 372.8      | 302.8      | 334.9      | 333.0       | 397.5       | 327.9       | 369.8       | 431.0   | 487.8   | 664.4   | 440.5    | 613.1    | 581.3    | 662.8    | 334.9         | 581.3      | 1.7         |
| 32540_at     | PPP3CC            | 1.22E-03 | 185.3      | 237.0      | 259.7      | 258.6       | 305.2       | 281.9       | 309.6       | 311.0   | 373.9   | 642.8   | 446.7    | 374.7    | 401.3    | 480.4    | 259.7         | 401.3      | 1.5         |
| 32541_at     | PPP3CC            | 7.37E-04 | 259.6      | 235.3      | 262.5      | 269.1       | 310.1       | 270.8       | 282.4       | 349.5   | 384.5   | 549.9   | 372.4    | 432.3    | 396.9    | 485.2    | 269.1         | 396.9      | 1.5         |
| 225519_at    | PPP4R2            | 6.76E-04 | 668.6      | 627.0      | 941.8      | 837.8       | 971.5       | 935.2       | 1009.8      | 934.3   | 1321.8  | 2475.1  | 1372.5   | 1378.2   | 1518.3   | 1724.1   | 935.2         | 1378.2     | 1.5         |
| 212527_at    | PPPE2             | 6.56E-04 | 1366.7     | 1402.9     | 1155.7     | 1293.4      | 1265.0      | 1115.6      | 1199.4      | 1718.1  | 1873.8  | 2141.9  | 1873.2   | 1999.4   | 2006.5   | 1970.5   | 1265.0        | 1970.5     | 1.6         |
| 203737_s_at  | PPRC1             | 6.86E-03 | 313.4      | 248.3      | 357.1      | 361.6       | 362.8       | 320.7       | 400.7       | 462.7   | 300.6   | 447.4   | 421.8    | 546.4    | 440.0    | 441.8    | 357.1         | 441.8      | 1.2         |
| 217192_s_at  | PRDM1             | 2.95E-04 | 59.9       | 76.8       | 69.5       | 71.7        | 74.2        | 62.2        | 73.3        | 107.5   | 105.3   | 155.3   | 104.9    | 171.8    | 153.9    | 150.4    | 71.7          | 150.4      | 2.1         |
| 228964_at    | PRDM1             | 1.47E-04 | 51.1       | 47.2       | 58.1       | 37.9        | 48.3        | 40.5        | 41.3        | 100.7   | 119.1   | 243.3   | 168.3    | 134.5    | 83.0     | 225.6    | 47.2          | 134.5      | 2.9         |
| 235668_at    | PRDM1             | 2.39E-04 | 49.3       | 70.0       | 58.5       | 49.7        | 43.8        | 33.8        | 38.1        | 73.0    | 116.0   | 167.6   | 139.9    | 92.4     | 69.9     | 120.8    | 49.3          | 116.0      | 2.4         |
| 224232_s_at  | PRELID1           | 1.81E-03 | 421.5      | 347.4      | 360.7      | 356.7       | 448.7       | 413.2       | 506.0       | 604.2   | 431.9   | 463.4   | 510.8    | 657.0    | 569.0    | 602.4    | 413.2         | 569.0      | 1.4         |
| 214617_at    | PRF1              | 2.25E-05 | 57.6       | 61.7       | 82.2       | 86.3        | 78.5        | 122.9       | 106.4       | 147.9   | 123.1   | 241.3   | 276.7    | 183.1    | 305.8    | 424.1    | 82.2          | 241.3      | 2.9         |
| 228230_at    | PRIC285           | 2.52E-05 | 71.3       | 61.7       | 61.1       | 52.7        | 66.3        | 55.7        | 67.4        | 146.4   | 142.1   | 280.9   | 175.6    | 209.9    | 198.6    | 252.6    | 61.7          | 198.6      | 3.2         |
| 232517_s_at  | PRIC285           | 8.43E-03 | 80.7       | 81.0       | 58.6       | 60.0        | 56.0        | 65.6        | 66.2        | 85.9    | 87.7    | 156.7   | 77.5     | 137.0    | 126.4    | 138.5    | 65.6          | 126.4      | 1.9         |
| 232518_at    | PRIC285           | 6.95E-03 | 55.9       | 44.5       | 56.3       | 71.1        | 55.0        | 51.1        | 71.2        | 64.2    | 56.8    | 110.1   | 77.3     | 92.0     | 100.8    | 98.6     | 55.9          | 92.0       | 1.6         |
| 232787_at    | PRIC285           | 5.12E-04 | 75.4       | 55.4       | 77.7       | 65.0        | 63.1        | 48.3        | 93.9        | 120.1   | 82.7    | 250.3   | 146.4    | 239.2    | 167.3    | 192.6    | 65.0          | 167.3      | 2.6         |
| 209799_at    | PRKAA1            | 9.01E-03 | 244.8      | 193.4      | 205.2      | 222.2       | 249.9       | 261.4       | 244.2       | 289.0   | 248.6   | 284.5   | 338.3    | 284.4    | 324.4    | 275.6    | 244.2         | 284.5      | 1.2         |
| 218292_s_at  | PRKAG2            | 2.14E-04 | 142.9      | 142.1      | 134.2      | 144.7       | 143.9       | 135.8       | 133.9       | 228.2   | 216.2   | 307.9   | 239.0    | 231.2    | 203.7    | 255.4    | 142.1         | 231.2      | 1.6         |
| 222582_at    | PRKAG2            | 2.98E-04 | 462.9      | 435.5      | 475.3      | 412.9       | 481.4       | 411.4       | 391.3       | 656.3   | 778.5   | 890.2   | 686.4    | 647.5    | 700.4    | 852.1    | 435.5         | 700.4      | 1.6         |
| 233748_x_at  | PRKAG2            | 5.49E-04 | 141.7      | 133.7      | 106.2      | 133.5       | 133.7       | 136.7       | 110.0       | 199.3   | 207.6   | 262.0   | 205.6    | 244.7    | 200.8    | 230.0    | 133.7         | 207.6      | 1.6         |
| 209685_s_at  | PRKCB             | 1.23E-04 | 41.3       | 49.9       | 57.7       | 63.9        | 45.3        | 38.3        | 45.2        | 94.3    | 109.7   | 142.1   | 124.2    | 157.2    | 84.1     | 217.2    | 45.3          | 124.2      | 2.7         |
| 38269_at     | PRKD2             | 3.77E-03 | 128.5      | 123.5      | 160.8      | 181.7       | 160.9       | 156.9       | 165.1       | 166.6   | 143.0   | 201.3   | 221.3    | 229.3    | 259.3    | 270.9    | 160.8         | 221.3      | 1.4         |
| 228725_x_at  | PRMT2             | 2.65E-03 | 514.7      | 361.7      | 392.6      | 423.8       | 406.5       | 397.2       | 366.5       | 529.8   | 552.2   | 698.9   | 532.5    | 716.6    | 697.0    | 657.8    | 397.2         | 657.8      | 1.7         |
| 232629_at    | PROK2             | 3.60E-04 | 22.8       | 10.4       | 11.6       | 32.2        | 30.2        | 12.9        | 11.3        | 69.8    | 51.2    | 948.2   | 156.0    | 325.2    | 538.6    | 666.6    | 12.9          | 512.5      | 39.6        |
| 202251_at    | PRPF3             | 1.64E-04 | 789.6      | 690.4      | 825.8      | 722.7       | 865.5       | 650.7       | 834.7       | 1078.8  | 1345.4  | 1792.2  | 1230.0   | 1321.2   | 1211.0   | 1572.3   | 789.6         | 1321.2     | 1.7         |
| 202126_at    | PRPF4B            | 7.89E-03 | 641.7      | 736.3      | 826.9      | 823.0       | 745.5       | 730.9       | 773.2       | 753.3   | 1022.2  | 1394.4  | 1099.7   | 837.4    | 867.3    | 989.5    | 745.5         | 989.5      | 1.3         |
| 211090_s_at  | PRPF4B            | 4.78E-03 | 63.7       | 67.3       | 141.6      | 125.4       | 126.8       | 128.3       | 116.7       | 154.7   | 112.2   | 244.9   | 181.1    | 139.5    | 170.1    | 152.9    | 125.4         | 154.7      | 1.2         |
| 227192_at    | PRRT2             | 4.35E-03 | 67.0       | 56.0       | 91.7       | 76.6        | 89.0        | 64.2        | 77.1        | 94.9    | 115.7   | 130.5   | 90.6     | 102.1    | 113.3    | 107.1    | 76.6          | 107.1      | 1.4         |
| 226695_at    | PRRX1             | 2.57E-03 | 41.5       | 39.7       | 33.3       | 32.6        | 15.7        | 29.3        | 24.6        | 52.9    | 69.6    | 130.4   | 48.8     | 71.7     | 57.8     | 89.5     | 32.6          | 69.6       | 2.1         |
| 203354_s_at  | PSD3              | 2.38E-03 | 470.5      | 550.2      | 401.0      | 622.3       | 984.0       | 425.6       | 1010.4      | 837.7   | 924.7   | 1380.2  | 1276.8   | 1155.5   | 1033.4   | 1417.1   | 550.2         | 1155.5     | 2.1         |
| 203355_s_at  | PSD3              | 5.94E-03 | 764.9      | 850.8      | 740.9      | 1133.0      | 1593.2      | 813.4       | 2108.1      | 1212.2  | 1558.1  | 2300.1  | 2136.7   | 1726.5   | 1701.4   | 2367.0   | 850.8         | 1726.5     | 2.0         |
| 1567443_x_at | PSEN1             | 3.50E-03 | 304.1      | 202.5      | 252.1      | 261.3       | 296.2       | 252.2       | 245.2       | 306.5   | 264.5   | 464.7   | 425.7    | 412.1    | 479.0    | 442.9    | 252.2         | 425.7      | 1.7         |
| 203460_s_at  | PSEN1             | 5.49E-03 | 915.8      | 949.1      | 1102.3     | 1048.8      | 1226.9      | 1035.3      | 1274.5      | 1052.4  | 1456.0  | 1852.7  | 1352.1   | 1396.1   | 1356.9   | 1678.1   | 1048.8        | 1396.1     | 1.3         |
| 201316_at    | PSMA2             | 3.63E-03 | 246.5      | 338.7      | 314.3      | 316.3       | 333.0       | 309.7       | 300.7       | 445.4   | 506.1   | 585.4   | 475.8    | 347.2    | 380.9    | 451.2    | 314.3         | 451.2      | 1.4         |
| 201317_s_at  | PSMA2             | 1.23E-03 | 1543.8     | 1609.2     | 1746.1     | 1785.8      | 1649.2      | 1706.9      | 1957.5      | 2061.3  | 2762.1  | 3786.3  | 2752.8   | 2210.9   | 2240.6   | 3035.1   | 1706.9        | 2752.8     |             |

Supplementary Table S1. Continued.

| ID          | Gene Symbol | p-value  | VW3_Saline | VW6_Saline | VW7_Saline | VW13_Saline | VW22_Saline | VW23_Saline | VW25_Saline | VW3_LPS | VW6_LPS | VW7_LPS | VW13_LPS | VW22_LPS | VW23_LPS | VW25_LPS | Median_saline | Median_LPS | Fold change |
|-------------|-------------|----------|------------|------------|------------|-------------|-------------|-------------|-------------|---------|---------|---------|----------|----------|----------|----------|---------------|------------|-------------|
| 204748_at   | PTGS2       | 1.12E-05 | 81.8       | 78.0       | 112.9      | 89.1        | 333.6       | 149.8       | 235.3       | 502.0   | 2703.2  | 4162.3  | 1355.5   | 3097.3   | 3134.8   | 4582.2   | 112.9         | 3097.3     | 27.4        |
| 204935_at   | PTPN2       | 8.13E-04 | 16.3       | 16.9       | 41.8       | 46.0        | 54.4        | 38.6        | 61.4        | 46.1    | 49.1    | 124.7   | 88.4     | 76.8     | 70.7     | 85.1     | 41.8          | 76.8       | 1.8         |
| 213137_s_at | PTPN2       | 2.30E-03 | 2671.3     | 2156.9     | 2199.3     | 2778.6      | 3328.0      | 2379.2      | 3102.0      | 3414.9  | 3323.2  | 3689.8  | 3435.4   | 4136.8   | 4139.1   | 4035.4   | 2671.3        | 3689.8     | 1.4         |
| 241622_at   | PTPN2       | 4.01E-03 | 135.4      | 107.1      | 175.3      | 158.1       | 171.1       | 137.5       | 191.6       | 171.9   | 168.5   | 287.4   | 193.7    | 223.7    | 182.6    | 218.6    | 158.1         | 193.7      | 1.2         |
| 241623_at   | PTPN2       | 8.05E-04 | 268.5      | 213.9      | 356.3      | 305.5       | 357.4       | 262.6       | 362.0       | 339.0   | 329.5   | 592.2   | 447.1    | 458.8    | 369.3    | 523.2    | 305.5         | 447.1      | 1.5         |
| 241983_at   | PTPN2       | 7.73E-03 | 220.6      | 176.4      | 343.9      | 258.9       | 270.0       | 256.9       | 302.7       | 294.0   | 280.6   | 372.8   | 323.0    | 321.5    | 336.7    | 381.5    | 258.9         | 323.0      | 1.2         |
| 221840_at   | PTPRE       | 9.39E-04 | 352.0      | 264.5      | 496.3      | 435.3       | 709.5       | 555.0       | 775.5       | 782.3   | 574.6   | 1162.7  | 939.1    | 1016.0   | 811.2    | 957.5    | 496.3         | 939.1      | 1.9         |
| 210173_at   | PTPRJ       | 7.13E-05 | 136.8      | 97.2       | 139.8      | 196.3       | 207.2       | 140.3       | 197.6       | 245.8   | 213.6   | 484.0   | 380.3    | 404.8    | 343.3    | 416.7    | 140.3         | 380.3      | 2.7         |
| 214137_at   | PTPRJ       | 3.89E-05 | 101.1      | 60.9       | 92.6       | 94.2        | 123.9       | 73.0        | 109.4       | 184.2   | 110.8   | 249.3   | 200.1    | 247.0    | 198.6    | 215.1    | 94.2          | 200.1      | 2.1         |
| 227396_at   | PTPRJ       | 2.55E-04 | 1548.9     | 1144.2     | 1392.3     | 1508.0      | 1870.3      | 1149.4      | 1866.3      | 2344.3  | 2288.8  | 2985.4  | 2716.7   | 2655.4   | 2739.7   | 2978.9   | 1508.0        | 2716.7     | 1.8         |
| 206157_at   | PTX3        | 4.32E-05 | 152.3      | 54.0       | 210.2      | 180.9       | 569.5       | 224.7       | 763.4       | 1866.8  | 5198.1  | 6968.5  | 4964.1   | 4222.2   | 4401.2   | 5999.7   | 210.2         | 4964.1     | 23.6        |
| 212662_at   | PVR         | 8.54E-03 | 794.6      | 521.2      | 731.4      | 659.5       | 492.7       | 583.8       | 864.2       | 929.7   | 914.8   | 1778.1  | 771.6    | 649.7    | 1256.4   | 1061.9   | 659.5         | 929.7      | 1.4         |
| 203149_at   | PVRL2       | 7.13E-05 | 138.5      | 99.0       | 125.1      | 246.9       | 138.2       | 87.3        | 145.7       | 238.2   | 197.8   | 420.3   | 622.1    | 368.7    | 343.8    | 399.1    | 138.2         | 368.7      | 2.7         |
| 225418_at   | PVRL2       | 1.97E-04 | 117.5      | 150.2      | 115.8      | 112.1       | 126.8       | 80.7        | 115.9       | 190.2   | 239.1   | 329.6   | 186.4    | 259.6    | 211.9    | 261.3    | 115.9         | 239.1      | 2.1         |
| 232078_at   | PVRL2       | 5.94E-05 | 56.8       | 38.4       | 50.5       | 67.7        | 61.4        | 42.3        | 75.0        | 110.6   | 85.4    | 163.5   | 125.8    | 174.7    | 133.0    | 148.3    | 56.8          | 133.0      | 2.3         |
| 232079_s_at | PVRL2       | 6.11E-06 | 120.1      | 84.0       | 149.7      | 161.6       | 172.1       | 99.3        | 159.1       | 315.7   | 309.7   | 445.3   | 392.9    | 494.1    | 363.9    | 503.3    | 149.7         | 392.9      | 2.6         |
| 201087_at   | PXN         | 4.22E-03 | 45.2       | 55.7       | 48.3       | 50.6        | 50.3        | 46.8        | 48.4        | 66.1    | 62.1    | 86.5    | 58.0     | 111.8    | 73.4     | 103.4    | 48.4          | 73.4       | 1.5         |
| 205174_s_at | QPCT        | 2.03E-03 | 94.9       | 78.0       | 74.0       | 82.5        | 85.7        | 48.6        | 82.8        | 118.0   | 95.3    | 154.9   | 111.0    | 151.8    | 102.4    | 176.5    | 82.5          | 118.0      | 1.4         |
| 204155_s_at | QSK         | 1.19E-04 | 112.1      | 100.4      | 151.5      | 163.1       | 189.9       | 146.9       | 190.5       | 191.4   | 173.7   | 321.2   | 274.8    | 261.1    | 298.7    | 343.9    | 151.5         | 274.8      | 1.8         |
| 204156_at   | QSK         | 2.93E-04 | 181.3      | 160.0      | 253.6      | 244.4       | 293.9       | 204.7       | 282.6       | 286.7   | 402.8   | 579.6   | 477.9    | 383.0    | 418.3    | 514.0    | 244.4         | 418.3      | 1.7         |
| 204157_s_at | QSK         | 8.92E-05 | 110.5      | 105.0      | 150.8      | 118.0       | 222.6       | 126.1       | 163.8       | 224.8   | 300.4   | 707.6   | 373.6    | 386.3    | 397.3    | 466.2    | 126.1         | 386.3      | 3.1         |
| 213034_at   | QSK         | 9.88E-05 | 213.2      | 162.5      | 226.4      | 257.9       | 325.4       | 218.4       | 290.3       | 351.5   | 374.5   | 540.8   | 436.2    | 505.9    | 517.6    | 616.7    | 226.4         | 505.9      | 2.2         |
| 206039_at   | RAB33A      | 5.76E-04 | 42.4       | 54.4       | 26.1       | 30.9        | 38.4        | 20.3        | 36.0        | 70.4    | 76.3    | 78.6    | 100.5    | 76.4     | 70.2     | 69.6     | 36.0          | 76.3       | 2.1         |
| 1554800_at  | RAB39       | 4.79E-04 | 263.1      | 228.7      | 211.1      | 216.8       | 248.4       | 241.9       | 276.7       | 345.0   | 391.6   | 468.9   | 406.0    | 333.8    | 442.1    | 469.6    | 241.9         | 406.0      | 1.7         |
| 225001_at   | RAB3D       | 8.99E-03 | 71.1       | 59.7       | 74.1       | 101.8       | 79.1        | 62.5        | 74.9        | 91.6    | 92.6    | 146.7   | 87.0     | 132.5    | 97.3     | 149.5    | 74.1          | 97.3       | 1.3         |
| 206113_s_at | RAB5A       | 1.09E-03 | 698.2      | 530.0      | 589.1      | 562.6       | 633.7       | 640.3       | 631.8       | 900.8   | 744.1   | 897.9   | 686.8    | 911.5    | 894.7    | 861.1    | 631.8         | 894.7      | 1.4         |
| 240990_at   | RAB5A       | 3.86E-03 | 39.0       | 52.9       | 53.4       | 52.9        | 54.2        | 63.9        | 52.9        | 49.8    | 57.8    | 113.8   | 89.9     | 71.5     | 93.3     | 89.1     | 52.9          | 89.1       | 1.7         |
| 218700_s_at | RAB7L1      | 5.20E-03 | 114.0      | 147.1      | 205.0      | 212.7       | 207.6       | 193.7       | 188.5       | 246.8   | 207.7   | 698.3   | 326.0    | 242.0    | 326.8    | 266.7    | 193.7         | 266.7      | 1.4         |
| 219210_s_at | RAB8B       | 8.91E-05 | 1136.0     | 1123.6     | 982.5      | 1008.3      | 1220.5      | 1126.0      | 1277.3      | 1694.2  | 2279.8  | 2583.3  | 1792.6   | 2206.1   | 2270.4   | 2545.5   | 1126.0        | 2270.4     | 2.0         |
| 222846_at   | RAB8B       | 8.93E-04 | 1517.1     | 1633.4     | 1601.5     | 1581.1      | 1657.3      | 1761.3      | 1755.5      | 1832.3  | 2574.5  | 3167.3  | 2415.0   | 2342.5   | 2506.6   | 2937.5   | 1633.4        | 2506.6     | 1.5         |
| 226633_at   | RAB8B       | 1.80E-03 | 973.0      | 1108.6     | 1255.2     | 1352.2      | 1344.8      | 1471.4      | 1635.0      | 1255.5  | 1956.9  | 2605.2  | 2063.7   | 1725.6   | 1917.4   | 2362.2   | 1344.8        | 1956.9     | 1.5         |
| 203020_s_at | RABGAP1L    | 9.39E-05 | 143.6      | 297.4      | 247.0      | 227.7       | 244.7       | 259.5       | 192.0       | 373.8   | 635.8   | 859.1   | 531.0    | 460.7    | 436.4    | 613.3    | 244.7         | 531.0      | 2.2         |
| 213982_s_at | RABGAP1L    | 5.76E-05 | 571.2      | 569.4      | 688.0      | 622.3       | 567.0       | 681.5       | 429.8       | 1157.8  | 2107.2  | 2520.0  | 1533.8   | 1521.7   | 1442.6   | 1931.4   | 571.2         | 1533.8     | 2.7         |
| 215342_s_at | RABGAP1L    | 8.13E-04 | 200.2      | 222.7      | 186.1      | 173.6       | 182.5       | 179.6       | 152.0       | 252.3   | 397.4   | 523.8   | 304.8    | 340.0    | 281.0    | 394.4    | 182.5         | 340.0      | 1.9         |
| 226089_at   | RABL3       | 1.92E-03 | 149.0      | 97.7       | 166.2      | 172.0       | 210.7       | 148.6       | 158.4       | 195.1   | 151.3   | 295.1   | 242.8    | 266.9    | 186.8    | 206.7    | 158.4         | 206.7      | 1.3         |
| 214435_x_at | RALA        | 6.91E-03 | 151.1      | 142.5      | 247.7      | 245.7       | 315.9       | 241.9       | 332.7       | 271.7   | 295.7   | 478.1   | 372.1    | 327.4    | 283.6    | 424.8    | 245.7         | 327.4      | 1.3         |
| 203096_s_at | RAPGEF2     | 1.84E-04 | 236.8      | 174.8      | 262.4      | 312.5       | 324.6       | 295.3       | 392.4       | 510.6   | 400.8   | 569.4   | 498.5    | 517.0    | 510.6    | 573.8    | 295.3         | 510.6      | 1.7         |
| 203097_s_at | RAPGEF2     | 2.53E-03 | 341.0      | 377.1      | 728.8      | 597.1       | 834.4       | 681.0       | 881.0       | 677.2   | 811.3   | 1623.0  | 1084.9   | 983.6    | 859.7    | 1155.3   | 681.0         | 983.6      | 1.4         |
| 215987_at   | RAPGEF2     | 9.12E-05 | 394.9      | 282.2      | 345.9      | 391.8       | 422.4       | 386.4       | 501.5       | 615.7   | 585.6   | 738.7   | 691.9    | 777.6    | 762.6    | 735.2    | 391.8         | 735.2      | 1.9         |
| 215992_s_at | RAPGEF2     | 9.40E-04 | 320.1      | 350.0      | 625.7      | 504.7       | 565.1       | 539.5       | 710.9       | 661.4   | 724.0   | 1198.0  | 821.3    | 749.9    | 787.8    | 899.4    | 539.5         | 787.8      | 1.5         |
| 206391_at   | RARRES1     | 2.67E-04 | 80.1       | 48.6       | 109.2      | 89.0        | 124.4       | 54.7        | 90.2        | 166.0   | 113.2   | 535.4   | 179.9    | 223.4    | 119.3    | 217.7    | 89.0          | 179.9      | 2.0         |
| 206392_s_at | RARRES1     | 1.08E-04 | 93.4       | 38.4       | 129.1      | 80.7        | 156.3       | 57.5        | 129.9       | 186.7   | 133.7   | 784.9   | 284.5    | 364.7    | 147.4    | 343.2    | 93.4          | 284.5      | 3.0         |
| 221872_at   | RARRES1     | 7.21E-05 | 76.7       | 40.9       | 133.2      | 68.1        | 158.0       | 38.6        | 109.6       | 165.5   | 139.2   | 879.2   | 308.6    | 355.0    | 145.9    | 361.9    | 76.7          | 308.6      | 4.0         |
| 206636_at   | RASA2       | 7.77E-03 | 216.5      | 168.9      | 253.9      | 240.3       | 274.8       | 287.8       | 272.2       | 282.4   | 231.3   | 353.9   | 309.9    | 295.1    | 330.4    | 342.7    | 253.9         | 309.9      | 1.2         |
| 1553785_at  | RASGEF1B    | 1.74E-04 | 725.7      | 485.6      | 546.8      | 640.8       | 759.5       | 618.0       | 750.2       | 1074.5  | 1194.9  | 1747.3  | 1251.5   | 1408.1   | 1309.8   | 1441.4   | 640.8         | 1309.8     | 2.0         |
| 1554999_at  | RASGEF1B    | 4.16E-04 | 111.5      | 91.6       | 163.5      | 113.3       | 167.8       | 133.7       | 187.5       | 262.8   | 262.9   | 552.8   | 328.3    | 239.6    | 216.1    | 346.2    | 133.7         | 262.9      | 2.0         |
| 205590_at   | RASGRP1     | 3.26E-04 | 130.0      | 78.2       | 210.6      | 183.7       | 434.5       | 98.6        | 401.5       | 489.3   | 434.0   | 892.4   | 1035.9   | 754.2    | 847.5    | 814.5    | 183.7         | 814.5      | 4.4         |
| 205801_s_at | RASGRP3     | 2.76E-04 | 244.9      | 200.4      | 206.0      | 176.7       | 111.7       | 106.1       | 157.6       | 337.4   | 337.7   | 628.2   | 324.3    | 268.5    | 257.9    | 393.0    | 176.7         | 337.4      | 1.9         |
| 203185_at   | RASSF2      | 1.15E-04 | 84.7       | 57.9       | 61.9       | 82.0        | 86.6        | 39.4        | 60.9        | 163.1   | 153.7   | 246.8   | 203.4    | 284.3    | 194.9    | 386.8    | 61.9          | 203.4      | 3.3         |
| 211540_s_at | RB1         | 9.30E-03 | 100.9      | 101.3      | 98.7       | 102.1       | 138.3       | 122.2       | 133.9       | 133.8   | 135.3   | 148.3   | 149.1    | 153.3    | 131.5    | 161.9    | 102.1         | 148.3      | 1.5         |
| 223802_s_at | RBBP6       | 7.63E-03 | 125.9      | 158.2      | 187.4      | 149.8       | 163.4       | 152.1       | 187.1       | 191.9   | 191.7   | 308.8   | 194.3    | 177.4    | 183.4    | 239.5    | 158.2         | 191.9      | 1.2         |
| 227635_at   | RBBP6       | 3.53E-03 | 381.1      | 409.2      | 425.5      | 402.9       | 416.3       | 340.0       | 431.8       | 479.0   | 525.2   | 699.9   | 432.7    | 594.1    | 534.6    | 632.9    | 409.2         | 534.6      | 1.3         |
| 207713_s_at | RBCK1       | 1.32E-03 | 313.3      | 305.1      | 292.4      | 294.9       | 283.0       | 323.0       | 262.1       | 427.9   | 389.9   | 450.0   | 350.6    | 417.9    | 449.1    | 417.5    | 294.9         | 417.9      | 1.4         |
| 221827_at   | RBCK1       | 2.76E-04 | 628.6      | 523.2      | 560.5      | 446.1       | 633.2       | 453.4       | 508.3       | 825.1   | 959.3   | 1216.1  | 742.9    | 1044.8   | 745.0    | 1132.9   | 523.2         | 959.3      | 1.8         |
| 218593_at   | RBM28       | 8.66E-03 | 334.2      | 232.0      | 302.2      | 289.6       | 334.0       | 249.0       | 328.1       | 382.5   | 309.0   | 518.4   | 440.1    | 350.3    | 343.7    | 412.2    | 302.2         | 382.5      | 1.3         |
| 214943_s_at | RBM34       | 8.79E-03 | 293.4      | 440.1      | 564.7      | 506.3       | 519.1       | 593.6       | 534.8       | 687.5   | 682.4   | 987.0   | 619.3    | 636.3    | 659.9    | 706.8    | 519.1         | 682.4      | 1.3         |
| 243038_at   | RBM43       | 5.44E-03 | 42.2       | 58.2       | 98.7       | 80.5        | 96.9        | 115.3       | 86.9        | 133.7   | 80.5    | 185.1   | 158.0    | 122.2    | 131.9    | 143.1    | 86.9          | 133.7      | 1.5         |
| 229421_s_at | RBM47       | 4.13E-03 | 272.0      | 263.5      | 318.7      | 332.7       | 411.9       | 326.5       | 424.3       | 414.7   | 402.1   | 601.2   | 460.5    | 459.0    | 493.4    | 481.8    | 326.5         | 460.5      | 1.4         |
| 203748_x_at | RBMS1       | 6.21E-03 | 1430.0     | 1205.4     | 1255.4     | 1362.0      | 1504.3      | 1235.0      | 1486.       |         |         |         |          |          |          |          |               |            |             |

TRANSCRIPTION PROFILES IN ALVEOLAR MACROPHAGES

Supplementary Table S1. Continued.

| ID          | Gene Symbol      | p-value  | VW3_Saline | VW6_Saline | VW7_Saline | VW13_Saline | VW22_Saline | VW23_Saline | VW25_Saline | VW3_LPS | VW6_LPS | VW7_LPS | VW13_LPS | VW22_LPS | VW23_LPS | VW25_LPS | Median_saline | Median_LPS | Fold change |
|-------------|------------------|----------|------------|------------|------------|-------------|-------------|-------------|-------------|---------|---------|---------|----------|----------|----------|----------|---------------|------------|-------------|
| 206036_s_at | REL              | 5.15E-04 | 134.7      | 149.0      | 260.5      | 210.7       | 252.4       | 250.1       | 231.7       | 230.6   | 201.6   | 487.4   | 263.5    | 383.6    | 427.6    | 414.7    | 231.7         | 383.6      | 1.7         |
| 201783_s_at | RELA             | 2.50E-04 | 577.9      | 481.3      | 677.2      | 640.1       | 901.3       | 604.0       | 810.4       | 848.2   | 1197.4  | 1498.9  | 1068.0   | 1351.6   | 1179.9   | 1413.0   | 640.1         | 1197.4     | 1.9         |
| 209878_s_at | RELA             | 4.91E-03 | 40.5       | 28.1       | 40.1       | 48.8        | 50.1        | 40.3        | 54.8        | 46.1    | 43.4    | 70.2    | 61.6     | 92.7     | 60.7     | 61.5     | 40.5          | 61.5       | 1.5         |
| 230202_at   | RELA             | 9.75E-04 | 661.0      | 454.7      | 583.7      | 629.8       | 819.1       | 573.8       | 761.5       | 850.8   | 1133.0  | 1384.3  | 885.6    | 1219.3   | 1159.5   | 1375.6   | 629.8         | 1159.5     | 1.8         |
| 205205_at   | RELB             | 7.19E-04 | 107.2      | 61.6       | 73.3       | 94.5        | 147.0       | 72.3        | 135.0       | 143.0   | 125.8   | 215.9   | 171.5    | 273.9    | 218.2    | 210.6    | 94.5          | 210.6      | 2.2         |
| 227060_at   | RELT             | 6.66E-03 | 140.5      | 120.4      | 190.5      | 205.4       | 210.5       | 170.6       | 217.4       | 193.6   | 137.2   | 263.0   | 274.0    | 263.2    | 296.4    | 245.5    | 190.5         | 263.0      | 1.4         |
| 200939_s_at | RERE             | 1.11E-03 | 32.2       | 33.1       | 39.9       | 44.1        | 49.6        | 46.5        | 30.3        | 70.1    | 49.2    | 89.8    | 61.0     | 72.5     | 60.4     | 54.7     | 39.9          | 61.0       | 1.5         |
| 212646_at   | RFTN1            | 1.39E-04 | 92.9       | 91.7       | 157.0      | 127.3       | 232.5       | 125.2       | 170.3       | 216.6   | 155.1   | 321.3   | 239.7    | 336.1    | 230.8    | 266.9    | 127.3         | 239.7      | 1.9         |
| 209568_s_at | RGL1             | 6.64E-06 | 138.7      | 63.9       | 112.3      | 75.1        | 107.8       | 63.8        | 103.1       | 635.5   | 1196.3  | 1551.4  | 684.3    | 841.5    | 573.7    | 1323.2   | 103.1         | 841.5      | 8.2         |
| 202988_s_at | RGS1             | 9.16E-05 | 88.2       | 73.1       | 133.7      | 101.3       | 106.5       | 88.7        | 86.4        | 183.5   | 223.0   | 264.7   | 324.0    | 196.6    | 160.5    | 177.8    | 88.7          | 196.6      | 2.2         |
| 209325_s_at | RGS16            | 6.30E-03 | 52.2       | 35.7       | 44.9       | 44.0        | 46.7        | 40.0        | 43.9        | 59.9    | 42.9    | 52.7    | 75.1     | 107.4    | 60.7     | 76.9     | 44.0          | 60.7       | 1.4         |
| 202388_at   | RGS2             | 7.96E-04 | 123.4      | 167.3      | 178.5      | 101.4       | 273.4       | 137.7       | 144.0       | 152.7   | 724.5   | 952.4   | 205.8    | 1228.6   | 539.8    | 1142.9   | 144.0         | 724.5      | 5.0         |
| 219202_at   | RHBDP2           | 2.96E-04 | 106.8      | 80.8       | 140.7      | 139.1       | 121.7       | 115.3       | 157.6       | 164.5   | 120.1   | 210.7   | 197.3    | 231.9    | 244.9    | 264.5    | 121.7         | 210.7      | 1.7         |
| 219045_at   | RHOF             | 8.91E-03 | 102.0      | 62.5       | 107.2      | 98.7        | 98.8        | 57.7        | 97.1        | 157.6   | 60.5    | 122.4   | 133.7    | 163.2    | 119.2    | 178.2    | 98.7          | 133.7      | 1.4         |
| 204951_at   | RHOH             | 1.05E-04 | 158.6      | 158.5      | 204.0      | 215.8       | 234.8       | 185.4       | 315.2       | 305.7   | 824.4   | 1421.4  | 526.0    | 759.2    | 801.2    | 1200.9   | 204.0         | 801.2      | 3.9         |
| 212117_at   | RHOQ             | 7.31E-03 | 2997.5     | 2815.1     | 3023.6     | 3231.1      | 3546.7      | 3073.3      | 3445.7      | 3562.6  | 3620.1  | 4445.9  | 3909.4   | 4121.2   | 4017.8   | 4042.4   | 3073.3        | 4017.8     | 1.3         |
| 223169_s_at | RHOU             | 2.51E-03 | 478.9      | 414.7      | 484.7      | 559.5       | 638.7       | 549.8       | 562.1       | 589.4   | 806.6   | 905.2   | 640.2    | 894.5    | 810.9    | 1039.9   | 549.8         | 810.9      | 1.5         |
| 226310_at   | RICTOR           | 1.26E-03 | 146.1      | 134.3      | 209.2      | 181.6       | 211.2       | 210.5       | 191.9       | 196.4   | 206.0   | 405.1   | 281.8    | 256.8    | 282.4    | 341.0    | 191.9         | 281.8      | 1.5         |
| 226312_at   | RICTOR           | 5.44E-03 | 728.4      | 611.7      | 953.9      | 827.1       | 965.9       | 947.0       | 976.6       | 874.2   | 1231.6  | 1958.8  | 1252.0   | 1112.7   | 1143.0   | 1495.1   | 947.0         | 1231.6     | 1.3         |
| 228248_at   | RICTOR           | 1.08E-03 | 102.3      | 109.9      | 217.5      | 196.2       | 208.2       | 199.1       | 198.0       | 197.6   | 190.0   | 480.1   | 382.6    | 247.1    | 256.0    | 336.4    | 198.0         | 256.0      | 1.3         |
| 227983_at   | RILPL2           | 6.24E-03 | 1495.1     | 1259.4     | 1501.5     | 1481.9      | 1854.1      | 1392.3      | 1888.3      | 2096.4  | 1699.3  | 2157.6  | 1954.1   | 1875.3   | 2076.1   | 2305.2   | 1495.1        | 2076.1     | 1.4         |
| 225978_at   | RIMKLB           | 6.79E-03 | 743.0      | 911.9      | 1004.9     | 988.4       | 883.0       | 973.6       | 952.4       | 852.1   | 1475.6  | 1835.7  | 1437.7   | 1054.5   | 1057.2   | 1601.3   | 952.4         | 1437.7     | 1.5         |
| 225999_at   | RIMKLB           | 2.80E-03 | 142.9      | 113.9      | 141.0      | 138.8       | 145.8       | 136.8       | 123.7       | 176.5   | 189.6   | 269.4   | 186.5    | 168.8    | 188.5    | 218.2    | 138.8         | 188.5      | 1.4         |
| 229344_x_at | RIMKLB           | 7.19E-03 | 437.0      | 546.3      | 689.1      | 576.5       | 541.4       | 453.6       | 580.8       | 509.8   | 915.7   | 1140.3  | 752.5    | 578.1    | 573.7    | 813.4    | 546.3         | 752.5      | 1.4         |
| 209684_at   | RIN2             | 5.43E-03 | 3124.7     | 2572.6     | 3702.4     | 3738.5      | 4418.8      | 4571.2      | 4301.3      | 4124.5  | 5169.8  | 6202.5  | 4890.9   | 5391.0   | 5024.8   | 6603.9   | 3738.5        | 5169.8     | 1.4         |
| 233811_at   | RIN2             | 1.11E-03 | 91.3       | 60.5       | 69.4       | 61.9        | 58.9        | 63.4        | 76.9        | 126.0   | 78.8    | 111.8   | 100.2    | 159.5    | 122.5    | 135.9    | 63.4          | 122.5      | 1.9         |
| 202129_s_at | RICK3            | 6.93E-03 | 293.1      | 267.6      | 307.0      | 347.8       | 316.9       | 311.2       | 327.9       | 394.0   | 324.3   | 440.0   | 402.5    | 425.9    | 369.1    | 379.6    | 311.2         | 394.0      | 1.3         |
| 209941_at   | RIPK1            | 4.98E-03 | 374.6      | 432.3      | 486.5      | 497.2       | 513.7       | 495.6       | 555.9       | 508.8   | 626.6   | 943.0   | 649.9    | 566.8    | 625.5    | 775.0    | 495.6         | 626.6      | 1.3         |
| 209544_at   | RIPK2            | 5.74E-04 | 31.2       | 45.6       | 86.4       | 72.4        | 84.1        | 92.5        | 118.6       | 108.6   | 117.1   | 352.4   | 167.5    | 181.1    | 142.9    | 176.7    | 84.1          | 167.5      | 2.0         |
| 209545_s_at | RIPK2            | 8.61E-06 | 897.7      | 606.4      | 790.5      | 657.5       | 984.1       | 733.9       | 896.8       | 1993.0  | 2089.1  | 3144.6  | 1716.6   | 2746.2   | 2101.8   | 2687.2   | 790.5         | 2101.8     | 2.7         |
| 206111_at   | RNASE2           | 6.26E-03 | 33.2       | 44.6       | 43.0       | 41.8        | 27.9        | 30.8        | 42.9        | 59.1    | 58.2    | 56.0    | 52.9     | 84.1     | 40.5     | 78.4     | 41.8          | 58.2       | 1.4         |
| 218497_s_at | RNASEH1          | 1.74E-03 | 533.9      | 499.9      | 491.5      | 501.1       | 460.6       | 450.4       | 487.0       | 597.6   | 733.7   | 940.1   | 785.5    | 592.4    | 738.0    | 882.1    | 491.5         | 738.0      | 1.5         |
| 212724_at   | RND3             | 3.07E-03 | 911.9      | 412.7      | 436.6      | 612.3       | 935.0       | 207.5       | 1104.6      | 1073.5  | 2526.2  | 4264.9  | 1906.5   | 1702.2   | 1675.7   | 2530.0   | 612.3         | 1906.5     | 3.1         |
| 200868_s_at | RNF114           | 2.87E-03 | 420.3      | 451.8      | 510.6      | 412.0       | 536.6       | 503.7       | 444.8       | 566.2   | 597.5   | 937.4   | 573.6    | 645.1    | 619.1    | 653.2    | 451.8         | 619.1      | 1.4         |
| 212742_at   | RNF115           | 3.29E-03 | 611.6      | 633.6      | 726.3      | 702.1       | 822.5       | 797.9       | 592.3       | 929.2   | 1093.6  | 1581.0  | 934.4    | 943.8    | 1012.8   | 888.8    | 702.1         | 943.8      | 1.3         |
| 228153_at   | RNF144B          | 1.14E-03 | 2926.0     | 2058.7     | 3595.6     | 2336.0      | 4305.4      | 3061.6      | 4577.7      | 4639.8  | 5631.1  | 7909.2  | 5288.7   | 5179.8   | 5558.6   | 6687.5   | 3061.6        | 5558.6     | 1.8         |
| 235549_at   | RNF144B          | 1.35E-04 | 244.6      | 161.8      | 402.8      | 235.8       | 576.6       | 358.0       | 600.6       | 744.9   | 860.3   | 1266.0  | 807.5    | 957.6    | 998.4    | 1290.6   | 358.0         | 957.6      | 2.7         |
| 239012_at   | RNF144B          | 8.67E-05 | 2235.0     | 1573.8     | 2677.0     | 1583.2      | 3466.1      | 2104.8      | 3619.9      | 3935.4  | 4708.6  | 6707.8  | 4547.5   | 5706.2   | 5651.1   | 7197.1   | 2235.0        | 5651.1     | 2.5         |
| 239704_at   | RNF144B          | 5.51E-05 | 428.4      | 217.3      | 400.6      | 245.5       | 449.1       | 306.1       | 495.5       | 733.6   | 704.4   | 1378.2  | 658.7    | 1164.4   | 1443.0   | 1543.4   | 400.6         | 1164.4     | 2.9         |
| 236465_at   | RNF175           | 7.66E-05 | 144.5      | 100.3      | 97.0       | 117.7       | 149.3       | 91.9        | 124.9       | 228.5   | 160.5   | 217.9   | 229.1    | 330.2    | 175.5    | 311.8    | 117.7         | 228.5      | 1.9         |
| 220483_s_at | RNF19A           | 2.76E-04 | 682.2      | 584.0      | 553.2      | 589.7       | 775.3       | 567.6       | 628.2       | 858.1   | 969.7   | 1160.3  | 1094.9   | 1200.8   | 1048.0   | 1157.2   | 589.7         | 1094.9     | 1.9         |
| 223085_at   | RNF19A           | 1.67E-03 | 506.0      | 423.4      | 574.8      | 640.2       | 791.0       | 617.5       | 643.9       | 658.6   | 894.5   | 1330.4  | 1137.6   | 1020.3   | 841.7    | 1009.6   | 617.5         | 1009.6     | 1.6         |
| 213038_at   | RNF19B           | 1.91E-05 | 547.3      | 251.3      | 305.8      | 284.7       | 601.6       | 269.5       | 539.9       | 1390.7  | 1461.8  | 2129.8  | 1253.3   | 2118.0   | 1782.7   | 2066.2   | 305.8         | 1782.7     | 5.8         |
| 36564_at    | RNF19B           | 9.06E-06 | 524.0      | 316.4      | 364.9      | 371.0       | 728.8       | 337.5       | 611.2       | 1595.3  | 1856.0  | 2651.2  | 1534.8   | 2600.2   | 2169.5   | 2734.2   | 371.0         | 2169.5     | 5.8         |
| 1569078_at  | RNF213           | 4.11E-03 | 42.2       | 33.9       | 37.2       | 41.3        | 36.5        | 34.9        | 23.4        | 50.0    | 45.1    | 128.1   | 73.3     | 88.1     | 58.6     | 96.2     | 36.5          | 73.3       | 2.0         |
| 225929_s_at | RNF213           | 4.06E-04 | 1171.0     | 1291.5     | 574.4      | 1259.6      | 1091.3      | 994.6       | 1073.4      | 1610.4  | 1959.9  | 1457.3  | 2304.5   | 2060.1   | 2353.0   | 2995.8   | 1091.3        | 2060.1     | 1.9         |
| 225931_s_at | RNF213           | 8.16E-04 | 1065.2     | 1173.0     | 502.9      | 943.9       | 995.0       | 967.7       | 838.9       | 1420.4  | 1692.1  | 1317.1  | 2021.5   | 1593.2   | 1888.6   | 2358.7   | 967.7         | 1692.1     | 1.7         |
| 230000_at   | RNF213           | 4.97E-05 | 189.3      | 159.4      | 111.7      | 147.6       | 129.6       | 133.5       | 124.1       | 331.5   | 323.8   | 382.1   | 382.4    | 334.8    | 388.1    | 451.0    | 133.5         | 382.1      | 2.9         |
| 233880_at   | RNF213           | 4.93E-03 | 297.0      | 288.6      | 151.2      | 329.5       | 247.4       | 230.6       | 188.0       | 352.9   | 339.5   | 340.5   | 486.1    | 350.1    | 474.7    | 516.8    | 247.4         | 352.9      | 1.4         |
| 241480_at   | RNF213           | 2.92E-03 | 201.8      | 185.8      | 187.4      | 258.5       | 191.5       | 184.2       | 211.9       | 300.3   | 197.0   | 400.8   | 373.0    | 503.4    | 562.5    | 555.2    | 191.5         | 400.8      | 2.1         |
| 231635_x_at | RNF31            | 8.85E-03 | 697.7      | 647.6      | 589.9      | 577.1       | 633.8       | 543.4       | 662.1       | 754.9   | 711.5   | 759.0   | 756.8    | 856.3    | 802.0    | 858.4    | 633.8         | 759.0      | 1.2         |
| 222279_at   | RP3-377<br>H14.5 | 1.15E-03 | 431.0      | 385.9      | 639.3      | 615.1       | 561.0       | 479.4       | 570.0       | 593.5   | 653.2   | 1084.4  | 884.0    | 720.5    | 586.6    | 839.1    | 561.0         | 720.5      | 1.3         |
| 218499_at   | RP6-213<br>H19.1 | 2.14E-05 | 84.1       | 65.1       | 144.5      | 174.7       | 102.9       | 79.7        | 178.3       | 318.0   | 633.2   | 2132.0  | 719.8    | 512.7    | 539.5    | 1269.0   | 102.9         | 633.2      | 6.2         |
| 224407_s_at | RP6-213<br>H19.1 | 3.32E-04 | 48.4       | 75.7       | 51.1       | 50.7        | 37.6        | 29.5        | 39.1        | 109.7   | 119.2   | 387.7   | 179.4    | 182.3    | 171.2    | 266.6    | 48.4          | 179.4      | 3.7         |
| 221143_at   | RPA4             | 1.86E-03 | 39.7       | 22.8       | 43.5       | 43.5        | 62.8        | 40.5        | 42.6        | 58.4    | 44.6    | 88.7    | 81.3     | 61.4     | 90.8     | 83.9     | 42.6          | 81.3       | 1.9         |
| 218909_at   | RPS6KC1          | 6.07E-04 | 244.4      | 193.3      | 228.2      | 269.5       | 263.8       | 220.2       | 248.9       | 308.5   | 426.7   | 688.5   | 531.8    | 413.8    | 415.1    | 482.6    | 244.4         | 426.7      | 1.7         |
| 213903_s_at | RQCD1            | 5.00E-03 | 131.5      | 131.3      | 189.8      | 168.8       | 205.1       | 148.5       | 199.1       | 222.7   | 165.2   | 227.6   | 252.3    | 244.1    | 209.2    | 235.5    | 168.8         | 227.6      | 1.3         |
| 218088_s_at | RRAGC            | 9.69E-03 | 2300.6     | 2013.2     | 1715.9     | 1855.5      | 2120.6      | 1810.3      | 1991.7      | 2372.6  | 2819.1  | 2982.6  | 2110.1   | 2537.6   | 2714.8   | 3043.2   | 1991.7        |            |             |



Supplementary Table S1. Continued.

| ID           | Gene Symbol   | p-value  | VW3_Saline | VW6_Saline | VW7_Saline | VW13_Saline | VW22_Saline | VW23_Saline | VW25_Saline | VW3_LPS | VW6_LPS | VW7_LPS | VW13_LPS | VW22_LPS | VW23_LPS | VW25_LPS | Median_saline | Median_LPS | Fold change |
|--------------|---------------|----------|------------|------------|------------|-------------|-------------|-------------|-------------|---------|---------|---------|----------|----------|----------|----------|---------------|------------|-------------|
| 242625_at    | RSAD2         | 6.17E-06 | 427.9      | 245.9      | 248.4      | 154.4       | 220.8       | 158.8       | 163.9       | 2082.1  | 3893.3  | 4937.4  | 3168.7   | 2964.0   | 2363.8   | 4113.6   | 220.8         | 3168.7     | 14.4        |
| 34408_at     | RTN2          | 7.29E-03 | 112.3      | 116.4      | 113.8      | 143.9       | 111.9       | 123.6       | 122.5       | 156.8   | 133.8   | 132.0   | 161.8    | 163.4    | 214.4    | 172.2    | 116.4         | 161.8      | 1.4         |
| 219684_at    | RTP4          | 2.76E-05 | 268.2      | 297.7      | 267.4      | 239.3       | 236.9       | 239.2       | 193.9       | 517.4   | 609.2   | 720.4   | 426.8    | 559.1    | 501.0    | 537.0    | 239.3         | 537.0      | 2.2         |
| 203724_s_at  | RUFY3         | 2.95E-04 | 213.7      | 217.1      | 282.4      | 196.1       | 303.2       | 201.8       | 247.7       | 371.0   | 421.9   | 717.9   | 450.8    | 399.0    | 337.9    | 446.7    | 217.1         | 421.9      | 1.9         |
| 210251_s_at  | RUFY3         | 2.90E-04 | 536.5      | 399.0      | 451.5      | 468.1       | 617.8       | 459.6       | 577.6       | 860.4   | 929.3   | 1466.6  | 820.6    | 1035.9   | 997.9    | 993.5    | 468.1         | 993.5      | 2.1         |
| 213430_at    | RUFY3         | 4.65E-03 | 22.7       | 28.9       | 52.2       | 49.1        | 80.9        | 45.9        | 67.5        | 56.1    | 46.8    | 173.6   | 95.0     | 93.2     | 83.5     | 78.5     | 49.1          | 83.5       | 1.7         |
| 213437_at    | RUFY3         | 1.49E-04 | 463.2      | 367.1      | 393.7      | 420.3       | 508.2       | 366.8       | 442.2       | 681.4   | 792.8   | 1128.6  | 747.6    | 900.1    | 868.9    | 886.3    | 420.3         | 868.9      | 2.1         |
| 213939_s_at  | RUFY3         | 9.01E-05 | 53.3       | 58.4       | 87.9       | 70.9        | 84.2        | 70.0        | 79.3        | 108.8   | 114.1   | 269.8   | 172.3    | 155.9    | 122.5    | 139.2    | 70.9          | 139.2      | 2.0         |
| 227802_at    | RUFY3         | 4.05E-03 | 133.0      | 169.6      | 339.9      | 307.9       | 367.1       | 322.0       | 437.6       | 315.0   | 323.9   | 859.7   | 559.4    | 415.2    | 423.2    | 545.1    | 322.0         | 423.2      | 1.3         |
| 229334_at    | RUFY3         | 4.94E-05 | 401.8      | 481.2      | 580.3      | 535.0       | 756.2       | 514.8       | 718.0       | 846.2   | 1014.3  | 1505.0  | 1055.1   | 1237.8   | 1161.9   | 1201.1   | 535.0         | 1161.9     | 2.2         |
| 236859_at    | RUNX2         | 1.57E-03 | 66.1       | 84.9       | 54.2       | 60.4        | 73.1        | 59.6        | 52.9        | 91.7    | 109.2   | 135.8   | 96.3     | 98.1     | 119.4    | 103.6    | 60.4          | 103.6      | 1.7         |
| 204197_s_at  | RUNX3         | 4.69E-05 | 118.9      | 69.2       | 93.6       | 65.1        | 117.3       | 80.7        | 100.8       | 206.4   | 121.5   | 203.8   | 169.1    | 235.6    | 152.7    | 264.6    | 93.6          | 203.8      | 2.2         |
| 204198_s_at  | RUNX3         | 2.62E-04 | 137.1      | 93.2       | 96.1       | 73.5        | 108.5       | 63.0        | 115.7       | 237.7   | 131.7   | 222.4   | 148.6    | 309.2    | 193.2    | 364.0    | 96.1          | 222.4      | 2.3         |
| 206949_s_at  | RUSC1         | 6.93E-04 | 94.8       | 99.5       | 128.7      | 105.4       | 134.5       | 135.4       | 126.9       | 146.1   | 161.2   | 215.0   | 194.8    | 181.8    | 169.5    | 177.6    | 126.9         | 177.6      | 1.4         |
| 201844_s_at  | RYBP          | 3.09E-03 | 233.3      | 264.9      | 384.7      | 310.8       | 360.0       | 330.7       | 387.7       | 374.9   | 329.7   | 586.1   | 411.0    | 447.6    | 391.5    | 510.7    | 330.7         | 411.0      | 1.2         |
| 201845_s_at  | RYBP          | 9.96E-03 | 265.2      | 277.1      | 333.2      | 335.1       | 360.6       | 302.8       | 324.0       | 339.0   | 383.5   | 540.0   | 385.4    | 399.1    | 344.6    | 446.0    | 324.0         | 385.4      | 1.2         |
| 201846_s_at  | RYBP          | 1.54E-03 | 313.8      | 281.9      | 288.5      | 309.5       | 302.6       | 281.0       | 298.8       | 424.8   | 356.6   | 473.0   | 363.0    | 522.0    | 428.6    | 521.6    | 298.8         | 428.6      | 1.4         |
| 205863_at    | S100A12       | 1.15E-05 | 38.8       | 30.9       | 31.2       | 25.4        | 47.8        | 33.5        | 39.8        | 256.5   | 383.5   | 668.6   | 175.6    | 891.8    | 656.0    | 1490.9   | 33.5          | 656.0      | 19.6        |
| 202917_s_at  | S100A8        | 4.85E-03 | 4987.9     | 3865.7     | 3932.6     | 5863.0      | 6615.5      | 5579.6      | 5267.3      | 5556.7  | 6533.7  | 6552.6  | 6419.0   | 8658.1   | 8362.6   | 8935.8   | 5267.3        | 6552.6     | 1.2         |
| 214370_at    | S100A8        | 1.63E-03 | 2592.7     | 2052.3     | 1936.7     | 2802.8      | 3639.6      | 3119.9      | 2910.4      | 3091.5  | 3398.9  | 3698.8  | 3574.8   | 4959.0   | 4642.7   | 5160.5   | 2802.8        | 3698.8     | 1.3         |
| 204351_at    | S100P         | 1.15E-03 | 252.7      | 129.4      | 249.5      | 360.8       | 303.8       | 214.5       | 329.5       | 353.3   | 280.9   | 682.9   | 400.3    | 700.9    | 544.5    | 790.7    | 252.7         | 544.5      | 2.2         |
| 208537_at    | S1PR2         | 9.09E-03 | 44.8       | 55.3       | 55.1       | 63.4        | 60.6        | 54.6        | 58.3        | 71.0    | 60.7    | 87.4    | 74.5     | 65.5     | 93.8     | 81.7     | 55.3          | 74.5       | 1.3         |
| 227684_at    | S1PR2         | 8.59E-05 | 262.4      | 204.5      | 221.7      | 208.4       | 190.4       | 166.5       | 230.0       | 373.9   | 466.2   | 581.0   | 402.4    | 412.5    | 443.7    | 599.1    | 208.4         | 443.7      | 2.1         |
| 208607_s_at  | SAA1 /// SAA2 | 4.07E-05 | 114.1      | 140.8      | 154.5      | 100.7       | 154.4       | 119.9       | 99.9        | 233.9   | 250.8   | 260.0   | 203.9    | 267.3    | 210.5    | 159.4    | 119.9         | 233.9      | 2.0         |
| 214456_x_at  | SAA1 /// SAA2 | 2.47E-04 | 165.4      | 220.2      | 198.0      | 110.6       | 177.1       | 149.4       | 114.2       | 318.8   | 385.6   | 263.4   | 229.5    | 265.8    | 304.4    | 185.1    | 165.4         | 265.8      | 1.6         |
| 212845_at    | SAMD4A        | 4.19E-03 | 441.5      | 636.4      | 694.6      | 581.6       | 493.5       | 613.8       | 570.7       | 581.8   | 830.7   | 1254.3  | 753.2    | 626.6    | 709.2    | 799.0    | 581.6         | 753.2      | 1.3         |
| 215495_s_at  | SAMD4A        | 6.72E-05 | 184.2      | 208.8      | 183.6      | 156.3       | 151.9       | 139.2       | 161.1       | 284.5   | 513.1   | 706.4   | 398.2    | 478.6    | 447.1    | 536.7    | 161.1         | 478.6      | 3.0         |
| 219691_at    | SAMD9         | 6.17E-06 | 80.7       | 89.3       | 140.1      | 111.2       | 128.9       | 125.6       | 114.4       | 241.4   | 328.5   | 587.4   | 322.4    | 346.9    | 333.6    | 432.0    | 114.4         | 333.6      | 2.9         |
| 228531_at    | SAMD9         | 1.24E-04 | 2138.6     | 2593.4     | 2512.4     | 2214.9      | 2265.6      | 2876.6      | 2528.8      | 3212.8  | 4717.6  | 5254.5  | 4052.1   | 4067.0   | 4085.6   | 5191.0   | 2512.4        | 4085.6     | 1.6         |
| 226603_at    | SAMD9L        | 3.71E-05 | 1758.1     | 2284.3     | 1865.6     | 1646.7      | 1448.9      | 1492.6      | 1371.3      | 3230.6  | 4615.4  | 5305.7  | 3974.5   | 3523.7   | 3306.5   | 4808.2   | 1646.7        | 3974.5     | 2.4         |
| 230036_at    | SAMD9L        | 8.20E-04 | 1100.6     | 1442.5     | 1145.2     | 964.8       | 1001.7      | 904.3       | 784.1       | 1750.4  | 1879.0  | 2495.3  | 1752.4   | 1402.3   | 1449.7   | 1905.0   | 1001.7        | 1752.4     | 1.7         |
| 235643_at    | SAMD9L        | 1.65E-04 | 1741.1     | 2001.6     | 1686.6     | 1604.7      | 1392.6      | 1436.4      | 1273.6      | 2664.4  | 3421.3  | 4058.1  | 3067.6   | 3071.6   | 3012.7   | 4083.0   | 1604.7        | 3071.6     | 1.9         |
| 1555638_a_at | SAMSN1        | 5.80E-05 | 118.9      | 101.2      | 194.9      | 214.4       | 463.8       | 207.0       | 386.4       | 317.4   | 413.6   | 885.3   | 622.6    | 830.7    | 581.1    | 974.5    | 207.0         | 622.6      | 3.0         |
| 220330_s_at  | SAMSN1        | 3.54E-04 | 104.5      | 81.8       | 224.9      | 256.3       | 589.5       | 253.5       | 487.6       | 379.5   | 422.2   | 1033.5  | 732.3    | 900.2    | 599.0    | 986.1    | 253.5         | 732.3      | 2.9         |
| 201543_s_at  | SAR1A         | 1.38E-03 | 1287.1     | 1134.1     | 1107.2     | 1282.4      | 1327.3      | 1283.1      | 1223.2      | 1535.1  | 1610.8  | 2065.0  | 1747.5   | 1940.7   | 1904.0   | 1704.7   | 1282.4        | 1747.5     | 1.4         |
| 213236_at    | SASH1         | 2.77E-05 | 170.8      | 110.6      | 156.7      | 127.8       | 177.9       | 122.5       | 193.2       | 286.6   | 248.3   | 359.0   | 233.8    | 348.0    | 259.4    | 343.8    | 156.7         | 286.6      | 1.8         |
| 226022_at    | SASH1         | 2.38E-03 | 556.9      | 553.1      | 633.6      | 439.6       | 596.9       | 601.6       | 858.9       | 710.9   | 1151.0  | 1702.4  | 902.5    | 829.6    | 759.3    | 1399.8   | 596.9         | 902.5      | 1.5         |
| 41644_at     | SASH1         | 6.44E-05 | 242.1      | 192.9      | 214.4      | 174.0       | 239.9       | 213.0       | 305.2       | 441.3   | 393.3   | 522.0   | 337.3    | 388.4    | 355.8    | 530.1    | 214.4         | 393.3      | 1.8         |
| 203455_s_at  | SAT1          | 4.29E-03 | 4522.5     | 4402.1     | 5434.8     | 4955.2      | 5796.5      | 5880.8      | 5890.0      | 5581.9  | 7692.9  | 9161.3  | 7137.2   | 6725.6   | 7383.1   | 7411.3   | 5434.8        | 7383.1     | 1.4         |
| 210592_s_at  | SAT1          | 2.86E-03 | 6520.0     | 6664.4     | 6648.3     | 6458.5      | 7502.9      | 7162.6      | 6948.6      | 7830.5  | 9539.8  | 11817.6 | 9175.1   | 8921.6   | 9626.4   | 9425.6   | 6664.4        | 9425.6     | 1.4         |
| 213988_s_at  | SAT1          | 1.02E-04 | 5041.8     | 2868.9     | 2540.5     | 2542.8      | 4855.4      | 3860.3      | 2605.5      | 7176.7  | 5749.5  | 6825.7  | 4985.7   | 9373.1   | 8830.4   | 6615.1   | 2868.9        | 6825.7     | 2.4         |
| 222573_s_at  | SAV1          | 2.38E-03 | 451.4      | 357.1      | 489.9      | 491.0       | 615.3       | 493.5       | 547.8       | 595.2   | 610.6   | 916.2   | 556.2    | 824.7    | 739.5    | 766.4    | 491.0         | 739.5      | 1.5         |
| 1555021_a_at | SCARF1        | 5.41E-04 | 179.0      | 125.0      | 139.3      | 161.8       | 152.4       | 159.8       | 192.2       | 215.8   | 214.8   | 299.9   | 299.8    | 338.0    | 245.1    | 449.7    | 159.8         | 299.8      | 1.9         |
| 206995_x_at  | SCARF1        | 2.95E-04 | 80.8       | 74.6       | 105.9      | 102.4       | 88.1        | 114.0       | 140.2       | 123.0   | 155.0   | 271.2   | 175.0    | 141.7    | 168.8    | 248.2    | 102.4         | 168.8      | 1.6         |
| 219196_at    | SCG3          | 2.19E-03 | 48.7       | 42.7       | 51.6       | 48.2        | 43.0        | 35.8        | 31.4        | 54.5    | 68.4    | 90.0    | 108.4    | 68.6     | 50.5     | 43.2     | 43.0          | 68.4       | 1.6         |
| 218793_s_at  | SCML1         | 6.86E-04 | 106.2      | 174.2      | 237.6      | 219.1       | 284.9       | 197.8       | 287.1       | 284.2   | 380.7   | 871.5   | 406.2    | 430.6    | 323.9    | 472.2    | 219.1         | 406.2      | 1.9         |
| 222747_s_at  | SCML1         | 3.28E-04 | 214.1      | 237.9      | 231.4      | 210.5       | 294.6       | 217.2       | 243.6       | 401.3   | 462.4   | 870.4   | 400.9    | 496.4    | 369.7    | 579.3    | 231.4         | 462.4      | 2.0         |
| 206147_x_at  | SCML2         | 8.50E-03 | 215.8      | 182.8      | 225.0      | 206.7       | 241.7       | 222.0       | 281.6       | 254.8   | 285.5   | 298.8   | 290.4    | 296.8    | 230.6    | 376.2    | 222.0         | 290.4      | 1.3         |
| 205508_at    | SCN1B         | 3.09E-03 | 41.6       | 34.1       | 41.7       | 30.2        | 38.2        | 35.3        | 46.8        | 47.6    | 40.5    | 91.2    | 52.0     | 96.8     | 61.2     | 74.5     | 38.2          | 61.2       | 1.6         |
| 205241_at    | SCO2          | 3.53E-03 | 696.8      | 542.5      | 637.0      | 641.4       | 763.0       | 470.6       | 722.2       | 760.4   | 720.0   | 937.6   | 974.5    | 1337.5   | 1093.9   | 1060.0   | 641.4         | 974.5      | 1.5         |
| 219197_s_at  | SCUBE2        | 5.55E-03 | 75.5       | 62.7       | 52.0       | 51.4        | 73.5        | 54.5        | 45.1        | 81.1    | 107.1   | 119.9   | 79.2     | 96.3     | 75.4     | 122.9    | 54.5          | 96.3       | 1.8         |
| 202071_at    | SDC4          | 2.00E-03 | 916.5      | 273.6      | 774.4      | 759.1       | 1283.9      | 502.0       | 1437.2      | 1747.1  | 1325.5  | 3082.6  | 1502.5   | 2106.1   | 1961.6   | 1832.0   | 774.4         | 1832.0     | 2.4         |
| 218681_s_at  | SDF2L1        | 5.19E-03 | 251.5      | 209.1      | 216.8      | 243.2       | 248.0       | 220.0       | 245.6       | 303.7   | 236.4   | 284.1   | 308.5    | 365.0    | 351.6    | 304.2    | 243.2         | 304.2      | 1.3         |
| 202083_s_at  | SEC14L1       | 7.53E-03 | 77.0       | 80.0       | 107.1      | 93.7        | 89.4        | 94.1        | 89.0        | 97.6    | 84.0    | 148.0   | 118.7    | 131.8    | 113.0    | 116.1    | 89.4          | 116.1      | 1.3         |
| 216392_s_at  | SEC23IP       | 8.46E-03 | 602.0      | 500.1      | 585.6      | 561.4       | 610.8       | 546.5       | 644.0       | 721.2   | 609.4   | 781.5   | 691.7    | 715.3    | 807.0    | 732.9    | 585.6         | 721.2      | 1.2         |
| 212902_at    | SEC24A        | 4.55E-03 | 208.3      | 220.0      | 222.8      | 263.9       | 320.7       | 239.0       | 305.5       | 283.5   | 349.7   | 515.3   | 361.2    | 349.8    | 347.1    | 442.9    | 239.0         | 349.8      | 1.5         |
| 202375_at    | SEC24D        | 9.61E-03 | 46.2       | 77.5       | 130.4      | 144.3       | 142.1       | 118.7       | 148.5       | 144.2   | 141.3   | 309.1   | 246.3    | 159.9    | 144.4    | 171.6    | 130.4         | 159.9      | 1.2         |
| 222385_x_at  | SEC61A1       | 3.98E-04 | 386.5      | 287.2      | 332.9      | 398.2       | 327.7       | 309.0       | 366.9       | 510.1   | 444.3   | 618.6   | 536.3    | 576.0    | 560.9    | 569.1    | 332.9         | 560.9      | 1.7         |
| 203133_at</  |               |          |            |            |            |             |             |             |             |         |         |         |          |          |          |          |               |            |             |

TRANSCRIPTION PROFILES IN ALVEOLAR MACROPHAGES

Supplementary Table S1. Continued.

| ID           | Gene Symbol | p-value  | VW3_Saline | VW6_Saline | VW7_Saline | VW13_Saline | VW22_Saline | VW23_Saline | VW25_Saline | VW3_LPS | VW6_LPS | VW7_LPS | VW13_LPS | VW22_LPS | VW23_LPS | VW25_LPS | Median_saline | Median_LPS | Fold change |
|--------------|-------------|----------|------------|------------|------------|-------------|-------------|-------------|-------------|---------|---------|---------|----------|----------|----------|----------|---------------|------------|-------------|
| 203788_s_at  | SEMA3C      | 3.37E-03 | 372.5      | 314.7      | 454.8      | 340.2       | 449.9       | 488.9       | 509.7       | 423.3   | 436.1   | 697.5   | 446.8    | 583.7    | 624.9    | 644.0    | 449.9         | 583.7      | 1.3         |
| 219259_at    | SEMA4A      | 1.04E-03 | 72.6       | 72.9       | 108.3      | 117.1       | 133.6       | 97.2        | 94.3        | 127.4   | 84.7    | 160.4   | 184.2    | 189.8    | 142.5    | 180.4    | 97.2          | 160.4      | 1.6         |
| 234072_at    | SEMA4A      | 9.69E-04 | 43.8       | 43.1       | 34.5       | 31.4        | 34.7        | 38.4        | 29.5        | 57.7    | 57.9    | 54.0    | 74.4     | 54.5     | 67.1     | 64.0     | 34.7          | 57.9       | 1.7         |
| 203528_at    | SEMA4D      | 2.57E-05 | 3306.6     | 3015.1     | 3010.2     | 2512.2      | 3152.1      | 2450.7      | 3697.1      | 5822.9  | 7479.2  | 8508.1  | 6788.6   | 6058.7   | 6627.6   | 8211.2   | 3015.1        | 6788.6     | 2.3         |
| 228891_at    | SEMA4D      | 9.19E-04 | 120.1      | 164.4      | 214.7      | 163.6       | 165.1       | 147.7       | 139.9       | 239.9   | 203.0   | 292.2   | 278.8    | 225.5    | 259.9    | 233.4    | 163.6         | 239.9      | 1.5         |
| 57703_at     | SENP5       | 9.78E-03 | 548.3      | 638.1      | 597.6      | 569.6       | 568.1       | 604.8       | 576.9       | 650.6   | 686.3   | 735.1   | 709.4    | 719.8    | 776.4    | 736.4    | 576.9         | 719.8      | 1.2         |
| 239213_at    | SERPINB1    | 5.32E-03 | 172.2      | 152.8      | 159.4      | 113.4       | 165.1       | 119.7       | 151.2       | 173.6   | 210.3   | 230.5   | 140.6    | 252.1    | 161.8    | 244.6    | 152.8         | 210.3      | 1.4         |
| 204614_at    | SERPINB2    | 1.73E-03 | 26.6       | 45.2       | 5.9        | 29.5        | 45.0        | 9.1         | 16.2        | 53.6    | 145.5   | 166.6   | 94.7     | 136.8    | 129.8    | 86.0     | 26.6          | 129.8      | 4.9         |
| 206034_at    | SERPINB8    | 1.28E-03 | 413.2      | 316.7      | 299.1      | 497.2       | 519.8       | 288.3       | 442.4       | 523.5   | 641.1   | 773.6   | 703.2    | 752.5    | 765.2    | 928.7    | 413.2         | 752.5      | 1.8         |
| 209722_s_at  | SERPINB9    | 8.17E-05 | 69.7       | 52.6       | 45.5       | 43.2        | 44.8        | 27.7        | 46.7        | 200.1   | 112.8   | 195.9   | 202.3    | 397.8    | 189.5    | 313.8    | 45.5          | 200.1      | 4.4         |
| 209723_at    | SERPINB9    | 2.46E-06 | 38.0       | 38.1       | 45.6       | 35.3        | 68.0        | 15.1        | 91.8        | 268.2   | 540.3   | 1080.7  | 446.1    | 920.0    | 353.0    | 1257.3   | 38.1          | 540.3      | 14.2        |
| 242814_at    | SERPINB9    | 1.99E-04 | 62.9       | 44.7       | 38.3       | 30.5        | 36.5        | 26.6        | 33.5        | 127.7   | 96.5    | 258.4   | 197.4    | 242.2    | 120.9    | 316.9    | 36.5          | 197.4      | 5.4         |
| 202628_s_at  | SERPINE1    | 9.53E-03 | 76.7       | 54.7       | 67.8       | 46.6        | 52.6        | 41.2        | 37.4        | 98.5    | 61.0    | 120.6   | 51.2     | 77.8     | 89.2     | 97.8     | 52.6          | 89.2       | 1.7         |
| 223394_at    | SERTAD1     | 6.82E-03 | 342.7      | 255.8      | 287.7      | 317.7       | 325.4       | 274.1       | 353.6       | 360.9   | 323.7   | 443.2   | 365.4    | 574.8    | 458.9    | 491.4    | 317.7         | 443.2      | 1.4         |
| 226763_at    | SESTD1      | 7.10E-03 | 718.3      | 808.9      | 776.3      | 820.7       | 996.4       | 676.2       | 776.1       | 858.4   | 967.3   | 1288.7  | 961.8    | 1156.5   | 1044.0   | 1086.3   | 776.3         | 1044.0     | 1.3         |
| 1569105_at   | SETD5       | 8.84E-03 | 58.7       | 41.9       | 68.5       | 78.1        | 72.5        | 64.3        | 73.1        | 84.3    | 52.7    | 93.5    | 89.9     | 75.9     | 90.7     | 91.9     | 68.5          | 89.9       | 1.3         |
| 226898_s_at  | SFFQ        | 1.91E-03 | 300.3      | 225.2      | 309.3      | 360.2       | 356.5       | 329.0       | 415.7       | 420.4   | 370.1   | 555.0   | 432.6    | 461.2    | 508.4    | 526.4    | 329.0         | 461.2      | 1.4         |
| 222310_at    | SFRS15      | 8.37E-03 | 74.2       | 67.7       | 86.5       | 81.6        | 65.7        | 61.8        | 66.1        | 86.3    | 116.5   | 110.0   | 118.3    | 93.2     | 64.8     | 85.2     | 67.7          | 93.2       | 1.4         |
| 241245_at    | SFRS4       | 5.20E-03 | 136.4      | 124.9      | 184.4      | 186.7       | 215.0       | 189.1       | 237.3       | 197.3   | 148.4   | 314.8   | 227.5    | 262.9    | 236.2    | 306.7    | 186.7         | 236.2      | 1.3         |
| 214838_at    | SFTD2       | 4.28E-04 | 538.1      | 561.0      | 570.4      | 757.6       | 658.9       | 684.3       | 769.7       | 820.2   | 1164.8  | 1579.7  | 1178.2   | 1049.7   | 1057.7   | 1551.3   | 658.9         | 1164.8     | 1.8         |
| 201739_at    | SGK1        | 9.94E-03 | 5604.3     | 4348.4     | 6068.3     | 4716.9      | 4988.0      | 3484.7      | 5853.4      | 6434.5  | 5479.5  | 7621.2  | 6278.0   | 5682.8   | 5311.6   | 6718.3   | 4988.0        | 6278.0     | 1.3         |
| 220008_at    | SGK269      | 5.12E-04 | 50.6       | 62.9       | 70.0       | 59.9        | 94.3        | 62.2        | 64.1        | 98.8    | 92.9    | 141.6   | 85.5     | 138.2    | 83.7     | 109.2    | 62.9          | 98.8       | 1.6         |
| 225913_at    | SGK269      | 5.62E-03 | 214.2      | 181.4      | 243.9      | 229.4       | 328.8       | 220.8       | 268.8       | 247.1   | 262.7   | 451.4   | 312.2    | 374.5    | 285.2    | 372.1    | 229.4         | 312.2      | 1.4         |
| 212989_at    | SGMS1       | 2.12E-03 | 60.0       | 66.6       | 133.9      | 155.5       | 192.3       | 154.9       | 197.6       | 149.8   | 162.8   | 371.9   | 302.7    | 231.6    | 230.5    | 256.9    | 154.9         | 231.6      | 1.5         |
| 238567_at    | SGPP2       | 6.54E-04 | 29.8       | 31.5       | 24.8       | 18.2        | 32.6        | 15.8        | 29.4        | 86.3    | 50.4    | 362.6   | 97.8     | 111.9    | 80.5     | 111.5    | 29.4          | 97.8       | 3.3         |
| 228745_at    | SGTB        | 1.04E-03 | 114.6      | 139.2      | 180.2      | 214.7       | 335.6       | 194.1       | 381.9       | 274.5   | 198.8   | 510.0   | 354.5    | 466.0    | 460.1    | 580.0    | 194.1         | 460.1      | 2.4         |
| 232084_at    | SGTB        | 2.68E-03 | 29.5       | 33.5       | 37.8       | 33.7        | 68.8        | 21.3        | 75.0        | 59.0    | 42.1    | 111.5   | 83.6     | 94.5     | 79.2     | 110.9    | 33.7          | 83.6       | 2.5         |
| 222169_x_at  | SH2D3A      | 1.64E-03 | 89.2       | 67.5       | 109.8      | 95.5        | 94.7        | 99.9        | 116.7       | 108.4   | 113.7   | 161.5   | 121.9    | 127.2    | 152.8    | 152.8    | 95.5          | 127.2      | 1.3         |
| 209091_s_at  | SH3GLB1     | 2.93E-03 | 1097.4     | 917.4      | 1029.9     | 1145.7      | 1179.5      | 1059.7      | 1138.4      | 1366.7  | 1718.9  | 2170.7  | 1497.6   | 1471.9   | 1471.5   | 1727.5   | 1097.4        | 1497.6     | 1.4         |
| 210101_x_at  | SH3GLB1     | 4.01E-03 | 1949.7     | 1439.4     | 1631.7     | 1749.0      | 1869.6      | 1630.9      | 1747.8      | 2082.1  | 2668.7  | 2961.5  | 2259.5   | 2362.9   | 2409.7   | 2699.7   | 1747.8        | 2409.7     | 1.4         |
| 231823_s_at  | SH3PXD2B    | 6.81E-03 | 232.8      | 111.4      | 142.4      | 190.4       | 138.4       | 89.6        | 421.6       | 344.8   | 187.1   | 267.6   | 304.7    | 189.4    | 351.3    | 499.8    | 142.4         | 304.7      | 2.1         |
| 209339_at    | SIAH2       | 3.44E-04 | 137.9      | 121.9      | 125.3      | 148.0       | 154.1       | 132.1       | 149.9       | 193.3   | 201.9   | 275.5   | 218.5    | 224.4    | 218.2    | 269.0    | 137.9         | 218.5      | 1.6         |
| 219519_s_at  | SIGLEC1     | 7.05E-03 | 1967.6     | 2820.6     | 2362.2     | 2615.8      | 2056.2      | 1342.4      | 1142.4      | 2410.8  | 3311.6  | 3724.6  | 3573.1   | 2781.1   | 2723.4   | 3140.4   | 2056.2        | 3140.4     | 1.5         |
| 1552807_a_at | SIGLEC10    | 1.78E-03 | 173.3      | 125.8      | 207.8      | 125.3       | 195.8       | 126.0       | 137.0       | 355.7   | 173.7   | 246.3   | 190.7    | 410.1    | 184.7    | 328.3    | 137.0         | 246.3      | 1.8         |
| /// SIGLEC12 |             |          |            |            |            |             |             |             |             |         |         |         |          |          |          |          |               |            |             |
| 208078_s_at  | SIK1        | 2.36E-03 | 43.5       | 49.1       | 25.6       | 35.2        | 34.3        | 18.0        | 30.1        | 44.3    | 63.2    | 58.5    | 66.7     | 69.8     | 43.0     | 65.9     | 34.3          | 63.2       | 1.8         |
| 202255_s_at  | SIPA1L1     | 4.90E-04 | 115.1      | 140.4      | 142.2      | 184.3       | 185.7       | 120.1       | 159.8       | 162.5   | 205.5   | 287.3   | 245.3    | 278.2    | 217.2    | 289.3    | 142.2         | 245.3      | 1.7         |
| 202896_s_at  | SIRPA       | 1.02E-03 | 917.7      | 674.9      | 902.2      | 993.4       | 932.2       | 828.5       | 969.2       | 1221.5  | 1052.9  | 1400.3  | 1175.1   | 1595.2   | 1511.1   | 1385.2   | 917.7         | 1385.2     | 1.5         |
| 215889_at    | SKIL        | 5.24E-04 | 397.6      | 339.2      | 413.1      | 405.4       | 391.0       | 347.6       | 446.2       | 494.2   | 479.7   | 668.7   | 740.8    | 653.6    | 694.1    | 686.8    | 397.6         | 668.7      | 1.7         |
| 217591_at    | SKIL        | 1.09E-03 | 331.6      | 358.5      | 438.4      | 535.0       | 368.2       | 344.7       | 409.1       | 423.4   | 473.5   | 687.3   | 671.5    | 571.4    | 600.7    | 598.6    | 368.2         | 598.6      | 1.6         |
| 1555626_a_at | SLAMF1      | 6.38E-05 | 59.3       | 42.6       | 47.1       | 43.6        | 66.6        | 27.4        | 59.5        | 131.9   | 157.5   | 429.6   | 190.7    | 339.5    | 244.1    | 465.7    | 47.1          | 244.1      | 5.2         |
| 206181_at    | SLAMF1      | 6.17E-06 | 35.8       | 32.0       | 35.0       | 41.7        | 51.1        | 30.8        | 53.3        | 142.5   | 170.1   | 363.1   | 186.0    | 273.2    | 198.0    | 432.0    | 35.8          | 198.0      | 5.5         |
| 219159_s_at  | SLAMF7      | 1.03E-04 | 1597.1     | 299.8      | 630.5      | 367.5       | 1675.9      | 145.0       | 977.7       | 6087.8  | 7693.2  | 9371.7  | 6422.2   | 7654.9   | 5988.1   | 8523.6   | 630.5         | 7654.9     | 12.1        |
| 222838_at    | SLAMF7      | 2.52E-05 | 305.6      | 77.1       | 214.0      | 130.1       | 631.5       | 54.1        | 376.5       | 2596.2  | 3552.4  | 4776.7  | 3108.6   | 3738.3   | 2277.9   | 4335.3   | 214.0         | 3552.4     | 16.6        |
| 234306_s_at  | SLAMF7      | 7.38E-06 | 225.9      | 62.4       | 130.5      | 84.1        | 317.1       | 43.5        | 167.7       | 1567.1  | 1609.2  | 2597.0  | 1573.3   | 2459.5   | 1261.7   | 2213.7   | 130.5         | 1609.2     | 12.3        |
| 203123_s_at  | SLC11A2     | 4.05E-03 | 1946.2     | 957.1      | 1500.7     | 1586.4      | 1676.3      | 1115.4      | 1866.9      | 2051.7  | 1661.3  | 3173.0  | 2353.0   | 2077.2   | 2142.3   | 2669.7   | 1586.4        | 2142.3     | 1.4         |
| 203124_s_at  | SLC11A2     | 1.78E-03 | 684.3      | 335.4      | 744.3      | 734.4       | 916.7       | 558.1       | 885.9       | 971.5   | 680.7   | 1610.5  | 1213.7   | 992.0    | 986.1    | 1315.3   | 734.4         | 992.0      | 1.4         |
| 203125_x_at  | SLC11A2     | 6.93E-04 | 303.3      | 245.8      | 211.6      | 214.5       | 275.6       | 184.1       | 250.3       | 390.0   | 392.6   | 494.9   | 371.2    | 382.8    | 325.9    | 407.8    | 245.8         | 390.0      | 1.6         |
| 237106_at    | SLC11A2     | 2.11E-03 | 75.9       | 63.7       | 94.8       | 119.9       | 104.8       | 88.8        | 124.8       | 93.2    | 120.3   | 250.7   | 203.9    | 138.1    | 129.6    | 203.3    | 94.8          | 138.1      | 1.5         |
| 207057_at    | SLC16A7     | 2.47E-04 | 22.9       | 15.4       | 36.7       | 28.0        | 20.0        | 26.6        | 40.4        | 54.6    | 23.0    | 77.3    | 67.1     | 72.6     | 44.1     | 103.8    | 26.6          | 67.1       | 2.5         |
| 210807_s_at  | SLC16A7     | 9.28E-04 | 30.4       | 30.4       | 61.0       | 49.1        | 48.2        | 43.3        | 64.4        | 68.9    | 52.9    | 86.8    | 59.8     | 123.7    | 75.8     | 118.1    | 48.2          | 75.8       | 1.6         |
| 208389_s_at  | SLC1A2      | 1.93E-04 | 48.9       | 58.3       | 49.1       | 43.9        | 47.3        | 47.1        | 55.2        | 77.0    | 97.6    | 186.4   | 126.7    | 133.6    | 138.2    | 202.0    | 48.9          | 133.6      | 2.7         |
| 225491_at    | SLC1A2      | 1.83E-03 | 34.7       | 31.5       | 26.2       | 33.2        | 34.1        | 27.9        | 36.5        | 45.9    | 57.9    | 145.6   | 95.8     | 50.7     | 87.7     | 132.7    | 33.2          | 87.7       | 2.6         |
| 1569054_at   | SLC1A3      | 5.79E-04 | 34.5       | 37.1       | 58.3       | 66.2        | 61.1        | 40.8        | 70.8        | 68.0    | 86.2    | 199.6   | 119.7    | 87.9     | 76.7     | 111.0    | 58.3          | 87.9       | 1.5         |
| 202800_at    | SLC1A3      | 2.09E-03 | 2014.3     | 915.6      | 1563.6     | 1952.0      | 2569.4      | 1108.5      | 2841.7      | 3667.2  | 3741.8  | 4914.7  | 3752.5   | 3546.9   | 4304.5   | 3860.6   | 1952.0        | 3752.5     | 1.9         |
| 209610_s_at  | SLC1A4      | 1.39E-03 | 278.0      | 167.2      | 199.0      | 245.2       | 207.6       | 244.7       | 242.0       | 425.4   | 287.1   | 396.6   | 341.1    | 307.4    | 286.1    | 340.3    | 242.0         | 340.3      | 1.4         |
| 212810_s_at  | SLC1A4      | 9.59E-04 | 401.1      | 263.5      | 282.3      | 345.6       | 245.4       | 246.6       | 371.2       | 588.4   | 421.5   | 532.6   | 396.3    | 355.0    | 465.8    | 601.5    | 282.3         | 465.8      | 1.6         |
| 212811_x_at  | SLC1A4      | 1.09E-03 | 297.9      | 209.2      | 182.7      | 201.1       | 183.5       | 213.4       | 193.5       | 393.0   | 304.7   | 369.5   | 270.7    | 272.8    | 289.0    | 298.8    | 201.1         | 298.8      | 1.5         |
| 205896_at    | SLC22A4     | 3.76E-05 | 49.4       | 68.4       | 60.0       | 71.0        | 76.1        | 49.3        | 73.1        | 97.2    | 120.8   | 135.6   | 137.5    | 135.0    | 104.5    | 116.1    | 68.4          | 120.8      | 1.8         |
| 221432_s_at  | SLC25A28    | 2.03E-05 | 316.7      | 323.7      | 397.6      | 334.2       | 372.0       |             |             |         |         |         |          |          |          |          |               |            |             |

Supplementary Table S1. Continued.

| ID           | Gene Symbol | p-value  | VW3_Saline | VW6_Saline | VW7_Saline | VW13_Saline | VW22_Saline | VW23_Saline | VW25_Saline | VW3_LPS | VW6_LPS | VW7_LPS | VW13_LPS | VW22_LPS | VW23_LPS | VW25_LPS | Median_saline | Median_LPS | Fold change |
|--------------|-------------|----------|------------|------------|------------|-------------|-------------|-------------|-------------|---------|---------|---------|----------|----------|----------|----------|---------------|------------|-------------|
| 226179_at    | SLC25A37    | 1.88E-05 | 267.9      | 315.2      | 379.4      | 278.1       | 383.4       | 325.3       | 347.5       | 571.1   | 679.2   | 844.3   | 546.5    | 996.4    | 604.8    | 973.3    | 325.3         | 679.2      | 2.1         |
| 226928_x_at  | SLC25A37    | 9.31E-05 | 73.2       | 60.3       | 100.2      | 74.9        | 82.1        | 74.4        | 109.8       | 112.9   | 149.3   | 239.5   | 123.1    | 234.8    | 183.4    | 261.4    | 74.9          | 183.4      | 2.4         |
| 228527_s_at  | SLC25A37    | 1.30E-04 | 37.6       | 42.3       | 63.1       | 53.4        | 70.0        | 51.7        | 65.4        | 71.4    | 63.9    | 147.9   | 78.9     | 128.6    | 105.4    | 145.0    | 53.4          | 105.4      | 2.0         |
| 242335_at    | SLC25A37    | 8.77E-05 | 37.8       | 57.5       | 104.2      | 97.9        | 113.4       | 83.2        | 104.4       | 131.2   | 173.6   | 329.4   | 168.1    | 231.4    | 160.5    | 322.2    | 97.9          | 173.6      | 1.8         |
| 220091_at    | SLC2A6      | 2.48E-04 | 568.1      | 249.1      | 403.0      | 532.0       | 838.2       | 317.4       | 791.1       | 1130.6  | 1237.9  | 1729.1  | 1355.5   | 1896.3   | 2053.6   | 1876.4   | 532.0         | 1729.1     | 3.2         |
| 207362_at    | SLC30A4     | 1.37E-03 | 36.0       | 37.4       | 32.0       | 37.4        | 50.8        | 27.1        | 43.6        | 61.8    | 42.0    | 147.2   | 111.2    | 104.4    | 85.1     | 122.7    | 37.4          | 104.4      | 2.8         |
| 239596_at    | SLC30A7     | 1.89E-03 | 222.4      | 195.2      | 210.8      | 245.9       | 248.9       | 222.9       | 250.4       | 256.5   | 289.1   | 450.4   | 377.6    | 346.3    | 322.6    | 379.8    | 222.9         | 346.3      | 1.6         |
| 224626_at    | SLC35A4     | 5.93E-03 | 340.8      | 378.3      | 321.2      | 347.5       | 347.7       | 350.2       | 381.0       | 514.3   | 394.5   | 436.2   | 454.8    | 494.6    | 457.6    | 461.0    | 347.7         | 457.6      | 1.3         |
| 225277_at    | SLC39A13    | 7.22E-03 | 168.7      | 119.0      | 158.3      | 159.4       | 144.3       | 137.5       | 161.5       | 242.4   | 140.4   | 172.3   | 194.9    | 230.9    | 212.0    | 199.3    | 158.3         | 199.3      | 1.3         |
| 209267_s_at  | SLC39A8     | 8.13E-04 | 1024.5     | 119.7      | 408.6      | 465.7       | 1417.8      | 125.2       | 1321.9      | 2568.3  | 2355.2  | 4108.3  | 4170.4   | 3408.9   | 2909.0   | 4166.0   | 465.7         | 3408.9     | 7.3         |
| 216504_s_at  | SLC39A8     | 2.19E-04 | 374.9      | 66.1       | 190.1      | 252.7       | 642.6       | 68.6        | 595.9       | 1303.9  | 1246.9  | 2650.5  | 2425.1   | 2068.2   | 1551.4   | 2347.3   | 252.7         | 2068.2     | 8.2         |
| 219869_s_at  | SLC39A8     | 2.77E-04 | 624.8      | 36.6       | 195.2      | 256.9       | 717.4       | 80.7        | 633.7       | 2203.7  | 1574.7  | 3079.4  | 2600.5   | 3013.7   | 2157.5   | 3087.5   | 256.9         | 2600.5     | 10.1        |
| 222935_x_at  | SLC39A8     | 7.92E-04 | 76.8       | 80.2       | 112.1      | 87.7        | 109.5       | 74.4        | 107.3       | 153.1   | 96.8    | 181.7   | 162.8    | 215.1    | 172.8    | 149.5    | 87.7          | 162.8      | 1.9         |
| 228945_s_at  | SLC39A8     | 6.92E-05 | 633.2      | 127.7      | 209.1      | 336.8       | 740.6       | 110.4       | 629.0       | 2315.6  | 1606.6  | 2868.3  | 2667.7   | 2754.9   | 2118.5   | 3173.6   | 336.8         | 2667.7     | 7.9         |
| 223798_at    | SLC41A2     | 2.77E-05 | 248.3      | 186.4      | 273.7      | 321.9       | 368.1       | 228.6       | 300.1       | 639.9   | 761.0   | 1399.5  | 1022.0   | 788.6    | 1052.1   | 952.0    | 273.7         | 952.0      | 3.5         |
| 235299_at    | SLC41A2     | 1.03E-04 | 386.4      | 224.7      | 410.2      | 484.0       | 664.7       | 342.7       | 531.8       | 739.2   | 761.4   | 1531.2  | 1226.1   | 1095.4   | 1126.5   | 1310.3   | 410.2         | 1126.5     | 2.7         |
| 243894_at    | SLC41A2     | 1.15E-04 | 406.9      | 260.1      | 360.3      | 429.4       | 609.7       | 325.7       | 453.2       | 834.5   | 1109.4  | 1845.6  | 1247.8   | 1153.0   | 1393.9   | 1260.7   | 406.9         | 1247.8     | 3.1         |
| 226629_at    | SLC43A2     | 4.22E-03 | 117.1      | 82.7       | 121.6      | 161.1       | 150.8       | 149.6       | 154.3       | 165.5   | 135.8   | 213.8   | 185.1    | 158.3    | 236.7    | 263.6    | 149.6         | 185.1      | 1.2         |
| 210692_s_at  | SLC43A3     | 1.78E-04 | 1061.2     | 507.0      | 595.6      | 634.4       | 943.6       | 467.5       | 945.1       | 1690.3  | 1506.7  | 2320.1  | 1374.6   | 2344.6   | 2089.4   | 2178.6   | 634.4         | 2089.4     | 3.3         |
| 213113_s_at  | SLC43A3     | 4.25E-04 | 3696.4     | 2410.9     | 2169.8     | 2485.9      | 3536.4      | 1541.1      | 3277.5      | 5629.3  | 5879.5  | 7002.7  | 4381.5   | 6538.3   | 5846.0   | 6652.4   | 2485.9        | 5879.5     | 2.4         |
| 234976_x_at  | SLC4A5      | 1.86E-03 | 1108.2     | 399.0      | 643.6      | 757.5       | 842.2       | 456.8       | 1191.7      | 1428.9  | 1242.1  | 1868.8  | 1411.6   | 1346.2   | 1577.2   | 1721.6   | 757.5         | 1428.9     | 1.9         |
| 211030_s_at  | SLC6A6      | 5.11E-04 | 58.6       | 35.4       | 65.0       | 72.5        | 71.7        | 80.9        | 75.6        | 74.0    | 56.3    | 110.9   | 99.0     | 107.6    | 121.9    | 109.2    | 71.7          | 107.6      | 1.5         |
| 212290_at    | SLC7A1      | 4.49E-04 | 1200.1     | 469.1      | 673.6      | 756.2       | 1134.6      | 728.2       | 1230.1      | 1638.5  | 1072.5  | 1795.6  | 1368.6   | 1692.0   | 1784.9   | 2154.1   | 756.2         | 1692.0     | 2.2         |
| 212292_at    | SLC7A1      | 9.61E-04 | 68.4       | 43.8       | 63.1       | 55.3        | 85.9        | 47.1        | 85.3        | 104.7   | 56.2    | 140.5   | 100.2    | 133.4    | 114.8    | 124.1    | 63.1          | 114.8      | 1.8         |
| 212295_s_at  | SLC7A1      | 1.19E-03 | 670.1      | 301.4      | 532.5      | 535.6       | 795.5       | 500.6       | 1010.6      | 903.5   | 667.9   | 1391.6  | 995.5    | 1024.2   | 1113.9   | 1493.1   | 535.6         | 1024.2     | 1.9         |
| 201195_s_at  | SLC7A5      | 8.66E-05 | 69.7       | 69.5       | 47.5       | 56.4        | 65.9        | 53.0        | 70.3        | 172.2   | 156.7   | 208.3   | 161.7    | 497.5    | 201.6    | 346.2    | 65.9          | 201.6      | 3.1         |
| 210542_s_at  | SLCO3A1     | 2.07E-04 | 100.1      | 75.7       | 122.3      | 143.0       | 103.2       | 85.9        | 104.1       | 150.0   | 120.5   | 242.8   | 221.1    | 150.1    | 161.8    | 156.9    | 103.2         | 156.9      | 1.5         |
| 219229_at    | SLCO3A1     | 2.85E-04 | 710.2      | 286.4      | 375.0      | 597.4       | 639.7       | 428.6       | 562.8       | 1040.7  | 992.6   | 1398.8  | 1246.5   | 1321.3   | 1498.5   | 1212.2   | 562.8         | 1246.5     | 2.2         |
| 227367_at    | SLCO3A1     | 9.83E-04 | 272.7      | 141.3      | 250.3      | 343.4       | 345.5       | 290.6       | 360.6       | 463.1   | 477.1   | 700.5   | 580.4    | 515.0    | 614.1    | 526.4    | 290.6         | 526.4      | 1.8         |
| 229776_at    | SLCO3A1     | 5.18E-04 | 103.2      | 60.6       | 69.0       | 105.9       | 111.6       | 68.4        | 94.8        | 142.0   | 139.3   | 218.3   | 214.1    | 188.2    | 244.3    | 195.3    | 94.8          | 195.3      | 2.1         |
| 219911_s_at  | SLCO4A1     | 1.03E-03 | 35.1       | 36.6       | 39.9       | 42.7        | 28.2        | 23.6        | 33.1        | 64.3    | 52.0    | 62.7    | 51.8     | 65.5     | 49.2     | 83.5     | 35.1          | 62.7       | 1.8         |
| 219885_at    | SLFN12      | 1.71E-04 | 94.1       | 165.2      | 188.4      | 205.3       | 196.6       | 152.9       | 221.2       | 220.8   | 341.7   | 480.5   | 364.9    | 328.3    | 252.6    | 331.0    | 188.4         | 331.0      | 1.8         |
| 1553055_a_at | SLFN5       | 7.73E-05 | 624.1      | 386.0      | 745.5      | 896.4       | 788.6       | 646.3       | 664.8       | 1087.4  | 727.2   | 2117.7  | 2097.0   | 1391.0   | 1726.2   | 1995.1   | 664.8         | 1726.2     | 2.6         |
| 1557078_at   | SLFN5       | 4.93E-05 | 349.2      | 180.7      | 402.0      | 453.4       | 422.7       | 367.2       | 344.6       | 704.3   | 293.5   | 1057.9  | 1078.8   | 874.5    | 1000.1   | 1055.1   | 367.2         | 1000.1     | 2.7         |
| 238430_x_at  | SLFN5       | 1.52E-04 | 407.5      | 291.7      | 579.3      | 738.7       | 646.0       | 559.6       | 594.5       | 629.7   | 413.4   | 1064.1  | 1305.2   | 1008.0   | 1083.4   | 1256.0   | 579.3         | 1064.1     | 1.8         |
| 243999_at    | SLFN5       | 8.92E-05 | 240.4      | 150.3      | 257.9      | 289.8       | 287.1       | 218.0       | 237.0       | 448.1   | 233.9   | 669.1   | 670.5    | 532.1    | 555.3    | 688.1    | 240.4         | 555.3      | 2.3         |
| 205397_x_at  | SMAD3       | 1.90E-03 | 60.6       | 54.7       | 40.2       | 38.7        | 44.9        | 35.1        | 29.8        | 80.7    | 67.3    | 82.6    | 63.6     | 119.5    | 80.8     | 99.4     | 40.2          | 80.8       | 2.0         |
| 205398_s_at  | SMAD3       | 3.55E-05 | 36.5       | 19.6       | 23.1       | 22.3        | 25.1        | 32.0        | 22.4        | 80.2    | 55.6    | 99.5    | 103.3    | 124.9    | 81.3     | 111.6    | 23.1          | 99.5       | 4.3         |
| 218284_at    | SMAD3       | 1.91E-05 | 147.7      | 120.6      | 89.7       | 138.4       | 90.1        | 121.8       | 85.7        | 372.0   | 461.7   | 345.8   | 486.1    | 476.8    | 405.7    | 600.9    | 120.6         | 461.7      | 3.8         |
| 202303_x_at  | SMARCA5     | 2.28E-03 | 1177.3     | 1101.1     | 1435.6     | 1298.3      | 1290.9      | 1374.6      | 1393.1      | 1467.9  | 2037.9  | 2542.8  | 1820.9   | 1667.0   | 1661.8   | 2181.8   | 1298.3        | 1820.9     | 1.4         |
| 213859_x_at  | SMARCA5     | 9.70E-03 | 881.8      | 752.4      | 1015.5     | 862.3       | 884.8       | 837.7       | 918.1       | 936.0   | 1354.8  | 1623.0  | 1118.3   | 967.9    | 1060.9   | 1461.5   | 881.8         | 1118.3     | 1.3         |
| 1558747_at   | SMCHD1      | 2.48E-04 | 246.3      | 287.8      | 387.0      | 401.5       | 391.4       | 441.2       | 422.4       | 491.8   | 537.5   | 962.4   | 618.6    | 584.3    | 664.5    | 791.4    | 391.4         | 618.6      | 1.6         |
| 212569_at    | SMCHD1      | 6.30E-03 | 216.8      | 213.0      | 377.8      | 341.7       | 355.8       | 326.4       | 392.7       | 317.3   | 485.2   | 1001.8  | 499.9    | 389.9    | 425.7    | 565.7    | 341.7         | 485.2      | 1.4         |
| 212577_at    | SMCHD1      | 7.56E-04 | 116.5      | 130.0      | 186.1      | 193.7       | 218.5       | 221.4       | 230.4       | 240.2   | 293.2   | 623.7   | 368.7    | 309.2    | 312.7    | 428.1    | 193.7         | 312.7      | 1.6         |
| 241621_at    | SMCHD1      | 5.70E-03 | 58.8       | 64.6       | 82.2       | 90.1        | 80.4        | 87.2        | 81.6        | 70.7    | 124.6   | 191.9   | 130.2    | 101.2    | 99.6     | 139.6    | 81.6          | 124.6      | 1.5         |
| 222270_at    | SMEK2       | 4.88E-03 | 191.1      | 283.0      | 321.9      | 350.4       | 372.6       | 321.5       | 343.0       | 339.1   | 331.2   | 579.8   | 426.0    | 544.1    | 377.2    | 470.9    | 321.9         | 426.0      | 1.3         |
| 201793_x_at  | SMG7        | 5.32E-03 | 575.3      | 515.2      | 521.0      | 551.6       | 540.6       | 535.9       | 497.0       | 707.5   | 670.8   | 678.8   | 573.2    | 823.1    | 778.5    | 743.5    | 535.9         | 707.5      | 1.3         |
| 217189_s_at  | SMG7        | 8.01E-03 | 89.3       | 127.1      | 147.7      | 127.4       | 139.9       | 144.4       | 141.6       | 145.4   | 129.6   | 190.8   | 179.0    | 180.4    | 191.2    | 174.7    | 139.9         | 179.0      | 1.3         |
| 205622_at    | SMPD2       | 9.33E-04 | 141.7      | 72.1       | 139.8      | 127.2       | 139.0       | 109.9       | 147.6       | 191.4   | 128.2   | 246.0   | 160.7    | 244.0    | 256.9    | 220.0    | 139.0         | 220.0      | 1.6         |
| 213624_at    | SMPDL3A     | 2.02E-03 | 211.8      | 119.1      | 160.1      | 170.6       | 227.7       | 74.0        | 110.4       | 308.9   | 136.8   | 266.0   | 302.7    | 506.8    | 212.4    | 334.4    | 160.1         | 302.7      | 1.9         |
| 202043_s_at  | SMS         | 1.00E-03 | 2772.3     | 2101.7     | 3013.6     | 2553.4      | 2994.0      | 2617.7      | 3037.1      | 3432.3  | 3738.6  | 4943.5  | 4038.0   | 3607.7   | 4359.9   | 4677.5   | 2772.3        | 4038.0     | 1.5         |
| 218393_s_at  | SMU1        | 8.58E-03 | 573.1      | 541.5      | 554.2      | 626.5       | 600.0       | 557.1       | 616.6       | 631.6   | 700.6   | 819.5   | 718.2    | 704.6    | 787.5    | 796.7    | 573.1         | 718.2      | 1.3         |
| 242790_at    | SNF8        | 9.35E-03 | 93.6       | 74.6       | 109.2      | 115.9       | 107.1       | 124.6       | 122.2       | 100.2   | 112.1   | 130.1   | 143.8    | 130.1    | 161.6    | 158.6    | 109.2         | 130.1      | 1.2         |
| 219409_at    | SNIP1       | 8.66E-03 | 125.9      | 100.2      | 168.2      | 164.4       | 150.5       | 141.4       | 173.5       | 169.5   | 128.1   | 227.4   | 170.1    | 176.7    | 196.0    | 220.4    | 150.5         | 176.7      | 1.2         |
| 218032_at    | SNN         | 1.17E-03 | 498.9      | 384.6      | 921.2      | 875.8       | 1047.6      | 658.7       | 960.4       | 722.2   | 1620.8  | 2787.5  | 1307.2   | 1714.5   | 1668.9   | 2228.3   | 875.8         | 1668.9     | 1.9         |
| 218033_s_at  | SNN         | 3.11E-04 | 52.6       | 44.5       | 66.4       | 64.9        | 70.9        | 54.6        | 74.3        | 70.7    | 89.2    | 163.6   | 92.4     | 158.8    | 116.8    | 147.1    | 64.9          | 116.8      | 1.8         |
| 208821_at    | SNRBP       | 9.64E-03 | 253.4      | 206.0      | 271.6      | 291.5       | 277.9       | 250.2       | 310.9       | 331.7   | 303.2   | 332.5   | 313.6    | 356.0    | 356.7    | 346.5    | 271.6         | 332.5      | 1.2         |
| 1559343_at   | SNRPN       | 2.05E-03 | 323.1      | 378.3      | 470.3      | 450.7       | 535.8       | 455.5       | 551.7       | 488.7   | 545.1   | 866.6   | 561.6    | 640.7    | 661.7    | 737.1    |               |            |             |

TRANSCRIPTION PROFILES IN ALVEOLAR MACROPHAGES

Supplementary Table S1. Continued.

| ID           | Gene Symbol | p-value  | VW3_Saline | VW6_Saline | VW7_Saline | VW13_Saline | VW22_Saline | VW23_Saline | VW25_Saline | VW3_LPS | VW6_LPS | VW7_LPS | VW13_LPS | VW22_LPS | VW23_LPS | VW25_LPS | Median_saline | Median_LPS | Fold change |
|--------------|-------------|----------|------------|------------|------------|-------------|-------------|-------------|-------------|---------|---------|---------|----------|----------|----------|----------|---------------|------------|-------------|
| 227697_at    | SOCS3       | 9.09E-04 | 1043.1     | 414.1      | 1349.8     | 1192.6      | 1894.3      | 521.9       | 1994.4      | 2077.4  | 3443.6  | 6086.4  | 2548.4   | 3941.3   | 3365.4   | 4599.6   | 1192.6        | 3443.6     | 2.9         |
| 1566342_at   | SOD2        | 5.50E-03 | 6122.7     | 3207.7     | 5200.3     | 6326.2      | 9135.7      | 3771.3      | 9150.5      | 9268.3  | 9408.3  | 10834.3 | 10549.7  | 10568.1  | 9892.9   | 10171.6  | 6122.7        | 10171.6    | 1.7         |
| 215078_at    | SOD2        | 6.73E-05 | 147.2      | 50.2       | 290.6      | 172.5       | 420.0       | 87.4        | 388.8       | 848.9   | 1758.3  | 3278.5  | 1357.3   | 1723.8   | 1505.6   | 2447.0   | 172.5         | 1723.8     | 10.0        |
| 215223_s_at  | SOD2        | 7.14E-04 | 4218.9     | 906.2      | 2207.7     | 2925.5      | 5900.2      | 1364.4      | 5922.3      | 10226.3 | 9649.6  | 11595.2 | 10678.1  | 12031.8  | 11467.8  | 12572.6  | 2925.5        | 11467.8    | 3.9         |
| 216841_s_at  | SOD2        | 1.69E-03 | 2734.6     | 632.9      | 1933.2     | 2359.1      | 3878.9      | 1150.4      | 4163.2      | 4990.1  | 6103.9  | 8726.3  | 7258.2   | 6477.9   | 6082.5   | 7696.3   | 2359.1        | 6477.9     | 2.7         |
| 221477_s_at  | SOD2        | 6.72E-04 | 2031.1     | 637.6      | 1443.9     | 1493.0      | 1553.2      | 493.5       | 1743.4      | 3316.4  | 3599.2  | 5432.8  | 4135.9   | 3320.9   | 3148.3   | 3536.5   | 1493.0        | 3536.5     | 2.4         |
| 230295_at    | SOLH        | 5.10E-03 | 52.0       | 21.3       | 47.3       | 70.2        | 52.5        | 40.2        | 60.2        | 91.6    | 29.2    | 59.7    | 78.5     | 73.4     | 56.2     | 71.8     | 52.0          | 71.8       | 1.4         |
| 212777_at    | SOS1        | 1.87E-04 | 233.1      | 240.1      | 258.4      | 310.5       | 274.1       | 272.2       | 245.8       | 351.4   | 372.1   | 502.1   | 559.5    | 403.1    | 392.6    | 403.6    | 258.4         | 403.1      | 1.6         |
| 212780_at    | SOS1        | 1.33E-03 | 68.1       | 100.4      | 162.0      | 164.1       | 167.4       | 168.7       | 157.5       | 197.1   | 197.6   | 404.2   | 290.4    | 232.3    | 221.2    | 243.1    | 162.0         | 232.3      | 1.4         |
| 202863_at    | SP100       | 5.98E-04 | 356.6      | 349.8      | 469.9      | 478.7       | 526.7       | 465.5       | 528.7       | 628.4   | 699.2   | 1046.1  | 733.1    | 692.7    | 664.3    | 817.5    | 469.9         | 699.2      | 1.5         |
| 202864_s_at  | SP100       | 3.25E-04 | 1047.7     | 969.8      | 896.0      | 1067.8      | 1158.4      | 1028.8      | 1003.1      | 1465.6  | 1533.1  | 1913.2  | 1536.8   | 1790.7   | 1659.5   | 1647.5   | 1028.8        | 1647.5     | 1.6         |
| 210218_s_at  | SP100       | 6.59E-04 | 1151.2     | 864.4      | 842.2      | 933.5       | 808.0       | 674.0       | 691.4       | 1305.9  | 1417.2  | 1497.5  | 1476.7   | 1397.5   | 1224.4   | 1478.3   | 842.2         | 1417.2     | 1.7         |
| 210985_s_at  | SP100       | 1.37E-03 | 87.5       | 75.2       | 107.7      | 128.6       | 108.0       | 119.2       | 135.2       | 134.3   | 154.9   | 210.5   | 232.5    | 162.4    | 150.8    | 164.4    | 108.0         | 162.4      | 1.5         |
| 237426_at    | SP100       | 1.73E-03 | 35.2       | 51.2       | 42.2       | 41.2        | 43.6        | 42.9        | 31.5        | 87.9    | 68.0    | 88.3    | 71.0     | 63.0     | 52.9     | 52.9     | 42.2          | 68.0       | 1.6         |
| 208012_x_at  | SP110       | 7.13E-05 | 1995.0     | 1715.4     | 1692.2     | 1606.3      | 1492.7      | 1377.7      | 685.1       | 3110.1  | 3945.3  | 4461.5  | 3670.7   | 3417.7   | 2929.7   | 2356.4   | 1606.3        | 3417.7     | 2.1         |
| 208392_x_at  | SP110       | 9.01E-05 | 273.3      | 269.0      | 279.5      | 227.9       | 228.5       | 205.5       | 135.9       | 382.8   | 532.5   | 735.3   | 504.6    | 505.6    | 489.3    | 373.6    | 228.5         | 504.6      | 2.2         |
| 209761_s_at  | SP110       | 2.14E-05 | 833.1      | 664.0      | 754.2      | 659.5       | 663.4       | 745.5       | 344.0       | 1683.6  | 1511.8  | 2319.8  | 1625.0   | 1851.3   | 1545.5   | 1178.5   | 664.0         | 1625.0     | 2.4         |
| 209762_x_at  | SP110       | 7.73E-05 | 1920.6     | 1912.2     | 1568.4     | 1541.2      | 1353.9      | 1242.2      | 704.9       | 2903.5  | 4074.4  | 4423.7  | 3804.2   | 3050.5   | 3026.2   | 2379.8   | 1541.2        | 3050.5     | 2.0         |
| 223980_s_at  | SP110       | 2.15E-04 | 727.6      | 814.3      | 735.7      | 594.1       | 618.1       | 576.1       | 319.9       | 981.0   | 1662.1  | 2035.4  | 1130.4   | 1310.8   | 1382.2   | 994.5    | 618.1         | 1310.8     | 2.1         |
| 207777_s_at  | SP140       | 5.78E-04 | 329.3      | 319.8      | 243.1      | 293.2       | 275.1       | 261.5       | 163.6       | 447.6   | 510.8   | 576.2   | 504.4    | 382.1    | 421.9    | 279.0    | 275.1         | 447.6      | 1.6         |
| 214791_at    | SP140L      | 5.86E-04 | 1005.1     | 630.1      | 1065.1     | 951.0       | 564.5       | 831.9       | 914.0       | 1145.6  | 1094.2  | 2266.6  | 1490.3   | 1002.3   | 1648.1   | 1866.4   | 914.0         | 1490.3     | 1.6         |
| 210117_at    | SPAG1       | 4.34E-04 | 57.8       | 78.6       | 61.6       | 97.9        | 121.2       | 93.8        | 117.4       | 149.4   | 158.3   | 414.3   | 297.0    | 252.1    | 219.4    | 247.5    | 93.8          | 247.5      | 2.6         |
| 206748_s_at  | SPAG9       | 4.97E-03 | 581.9      | 467.2      | 517.5      | 490.9       | 546.5       | 499.1       | 571.9       | 576.1   | 743.4   | 814.4   | 620.2    | 794.0    | 731.4    | 780.1    | 517.5         | 743.4      | 1.4         |
| 222154_s_at  | SPATS2L     | 3.97E-03 | 1299.3     | 1437.9     | 1280.4     | 1109.4      | 1242.0      | 1286.0      | 1107.4      | 1578.5  | 1762.9  | 1904.5  | 1594.7   | 1465.8   | 1561.1   | 1586.7   | 1280.4        | 1586.7     | 1.2         |
| 216965_x_at  | SPG20       | 4.54E-03 | 48.4       | 51.8       | 57.2       | 56.7        | 52.3        | 44.7        | 56.9        | 58.5    | 61.7    | 90.6    | 101.3    | 66.4     | 56.4     | 75.7     | 52.3          | 66.4       | 1.3         |
| 219257_s_at  | SPHK1       | 1.02E-05 | 60.5       | 25.1       | 44.1       | 70.1        | 104.6       | 25.2        | 90.4        | 316.9   | 243.0   | 456.4   | 358.5    | 835.1    | 507.0    | 643.9    | 60.5          | 456.4      | 7.5         |
| 1553973_a_at | SPINK6      | 3.18E-03 | 121.3      | 73.6       | 62.2       | 56.1        | 143.8       | 83.2        | 142.0       | 140.8   | 153.4   | 376.3   | 143.8    | 242.5    | 206.6    | 281.1    | 83.2          | 206.6      | 2.5         |
| 1562415_a_at | SPOCD1      | 8.13E-03 | 115.4      | 58.4       | 131.7      | 144.8       | 128.0       | 71.7        | 215.1       | 176.7   | 100.7   | 242.8   | 178.9    | 141.6    | 130.0    | 224.4    | 128.0         | 176.7      | 1.4         |
| 226353_at    | SPPL2A      | 1.73E-03 | 2476.9     | 2797.1     | 2625.4     | 2639.6      | 3082.4      | 1949.4      | 2866.9      | 3195.7  | 3802.2  | 4811.2  | 3984.8   | 3597.7   | 3136.1   | 4136.3   | 2639.6        | 3802.2     | 1.4         |
| 219677_at    | SPSB1       | 3.86E-03 | 45.3       | 49.7       | 47.1       | 51.4        | 42.6        | 35.2        | 50.0        | 57.9    | 64.5    | 125.4   | 58.5     | 81.3     | 72.7     | 90.0     | 47.1          | 72.7       | 1.5         |
| 226075_at    | SPSB1       | 1.86E-03 | 22.6       | 38.7       | 49.6       | 57.1        | 38.1        | 36.4        | 47.0        | 40.3    | 58.8    | 86.9    | 61.2     | 72.7     | 52.6     | 112.0    | 38.7          | 61.2       | 1.6         |
| 203127_s_at  | SPTL2C      | 2.93E-04 | 448.6      | 308.6      | 408.5      | 488.8       | 375.7       | 414.5       | 377.4       | 708.5   | 885.7   | 1047.9  | 693.4    | 694.0    | 815.0    | 899.3    | 408.5         | 815.0      | 2.0         |
| 216202_s_at  | SPTL2C      | 5.40E-04 | 98.9       | 88.0       | 96.9       | 120.4       | 126.4       | 144.7       | 89.2        | 297.8   | 150.4   | 235.9   | 208.7    | 249.3    | 189.7    | 160.4    | 98.9          | 208.7      | 2.1         |
| 209218_at    | SQLE        | 4.70E-03 | 269.2      | 225.7      | 107.1      | 115.9       | 263.3       | 161.3       | 204.5       | 361.3   | 265.9   | 253.7   | 221.8    | 319.0    | 237.3    | 304.2    | 204.5         | 265.9      | 1.3         |
| 213562_s_at  | SQLE        | 2.85E-03 | 98.9       | 56.7       | 54.6       | 49.4        | 107.2       | 56.2        | 91.8        | 135.3   | 77.9    | 104.1   | 86.4     | 118.2    | 106.8    | 122.2    | 56.7          | 106.8      | 1.9         |
| 217995_at    | SQRDL       | 1.43E-03 | 6047.8     | 4269.9     | 4261.9     | 5557.6      | 5580.3      | 3754.6      | 6822.7      | 7822.7  | 6671.2  | 7199.5  | 7937.2   | 7967.9   | 7574.8   | 8405.6   | 5557.6        | 7822.7     | 1.4         |
| 1558211_s_at | SRC         | 4.22E-03 | 85.7       | 72.5       | 91.1       | 73.7        | 83.6        | 73.2        | 85.8        | 98.1    | 87.0    | 126.9   | 122.0    | 152.7    | 172.9    | 126.5    | 83.6          | 126.5      | 1.5         |
| 213324_at    | SRC         | 1.91E-05 | 156.0      | 119.4      | 211.3      | 226.8       | 267.4       | 245.5       | 279.4       | 354.5   | 234.8   | 541.4   | 454.8    | 492.4    | 530.8    | 516.0    | 226.8         | 492.4      | 2.2         |
| 221284_s_at  | SRC         | 7.18E-04 | 55.5       | 30.1       | 71.9       | 74.0        | 67.5        | 59.5        | 78.8        | 78.5    | 48.2    | 128.9   | 106.2    | 120.1    | 142.4    | 107.8    | 67.5          | 107.8      | 1.6         |
| 202401_s_at  | SRF         | 6.39E-03 | 1064.0     | 881.1      | 889.3      | 972.6       | 1026.8      | 919.7       | 1028.7      | 1115.6  | 1139.8  | 1229.7  | 1216.5   | 1253.2   | 1424.0   | 1588.4   | 972.6         | 1229.7     | 1.3         |
| 1556202_at   | SRGAP2      | 3.68E-03 | 66.6       | 42.5       | 66.2       | 65.4        | 63.6        | 57.1        | 65.4        | 68.2    | 56.8    | 121.5   | 116.0    | 90.0     | 79.9     | 125.5    | 65.4          | 90.0       | 1.4         |
| 213329_at    | SRGAP2      | 1.43E-04 | 181.7      | 130.0      | 139.2      | 187.6       | 159.4       | 150.9       | 133.5       | 291.0   | 243.4   | 306.3   | 299.4    | 296.0    | 296.8    | 382.0    | 139.2         | 296.8      | 2.0         |
| 227649_s_at  | SRGAP2      | 3.08E-05 | 176.4      | 170.5      | 240.6      | 220.0       | 232.5       | 204.6       | 207.6       | 361.6   | 356.4   | 504.0   | 387.3    | 396.4    | 341.7    | 460.1    | 207.6         | 387.3      | 1.9         |
| 1568955_at   | SRGAP2P1    | 3.93E-03 | 57.9       | 43.5       | 65.2       | 94.7        | 90.0        | 117.6       | 92.1        | 112.8   | 82.9    | 213.9   | 216.6    | 132.1    | 109.8    | 181.9    | 90.0          | 132.1      | 1.5         |
| 1568957_x_at | SRGAP2P1    | 3.03E-03 | 65.8       | 63.2       | 76.3       | 105.2       | 103.5       | 110.2       | 103.5       | 118.3   | 76.9    | 194.1   | 186.1    | 152.9    | 125.7    | 197.9    | 103.5         | 152.9      | 1.5         |
| 228628_at    | SRGAP2P1    | 2.88E-03 | 131.0      | 101.0      | 177.0      | 196.0       | 185.4       | 183.1       | 204.6       | 248.9   | 172.5   | 341.3   | 256.7    | 227.2    | 217.7    | 287.6    | 183.1         | 248.9      | 1.4         |
| 229067_at    | SRGAP2P1    | 5.56E-03 | 257.6      | 409.2      | 429.3      | 570.7       | 421.0       | 562.7       | 570.7       | 485.4   | 665.3   | 1031.4  | 815.4    | 520.1    | 591.3    | 845.1    | 429.3         | 665.3      | 1.5         |
| 1554676_at   | SRGN        | 1.42E-05 | 31.9       | 55.0       | 65.9       | 43.0        | 55.6        | 62.5        | 66.7        | 96.2    | 161.7   | 416.1   | 184.4    | 205.5    | 169.5    | 243.0    | 55.6          | 184.4      | 3.3         |
| 201858_s_at  | SRGN        | 3.57E-03 | 9012.0     | 9878.5     | 8794.8     | 10560.2     | 11150.0     | 9177.8      | 10846.0     | 10671.1 | 13097.9 | 13000.5 | 12828.5  | 13505.1  | 12461.7  | 14227.8  | 9878.5        | 13000.5    | 1.3         |
| 201859_at    | SRGN        | 5.68E-03 | 1198.4     | 1381.1     | 1812.8     | 2062.5      | 2342.9      | 2007.4      | 2247.4      | 1801.4  | 2550.6  | 2768.1  | 2826.8   | 2584.2   | 2235.6   | 3069.5   | 2007.4        | 2584.2     | 1.3         |
| 208921_s_at  | SRI         | 1.74E-03 | 4005.0     | 3576.7     | 3337.9     | 3840.4      | 4233.1      | 3152.4      | 4247.6      | 4732.8  | 5108.0  | 5989.0  | 5755.4   | 5311.6   | 5502.8   | 5953.8   | 3840.4        | 5502.8     | 1.4         |
| 202816_s_at  | SS18        | 2.99E-03 | 530.8      | 389.6      | 499.2      | 476.6       | 533.0       | 499.1       | 542.0       | 650.2   | 592.3   | 903.8   | 601.8    | 661.0    | 704.9    | 705.2    | 499.2         | 661.0      | 1.3         |
| 209954_x_at  | SS18        | 5.44E-03 | 421.7      | 346.4      | 390.1      | 363.3       | 385.4       | 334.6       | 358.5       | 403.6   | 411.0   | 541.1   | 503.0    | 537.0    | 532.6    | 537.9    | 363.3         | 532.6      | 1.5         |
| 217051_s_at  | SS18        | 1.32E-03 | 203.2      | 173.6      | 248.5      | 217.0       | 248.3       | 208.6       | 249.3       | 307.4   | 238.0   | 358.7   | 291.2    | 312.1    | 286.3    | 307.0    | 217.0         | 307.0      | 1.4         |
| 201138_s_at  | SSB         | 2.62E-03 | 3210.0     | 2878.8     | 2789.9     | 3046.5      | 2722.6      | 2948.5      | 2731.1      | 3549.7  | 4452.8  | 4847.0  | 4143.3   | 3654.8   | 3838.3   | 4629.9   | 2878.8        | 4143.3     | 1.4         |
| 201139_s_at  | SSB         | 9.20E-03 | 5923.3     | 5546.6     | 5369.1     | 5665.7      | 4748.0      | 5009.2      | 4975.5      | 5640.1  | 7706.7  | 7986.3  | 7047.4   | 6290.3   | 6726.9   | 7550.6   | 5369.1        | 7047.4     | 1.3         |
| 229744_at    | SSFA2       | 5.40E-03 | 105.7      | 110.0      | 190.1      | 146.5       | 161.2       | 151.1       | 183.4       | 156.1   | 154.1   | 334.8   | 274.8    | 190.9    | 187.4    | 205.3    | 151.1         | 190.9      | 1.3         |
| 236207_at    | SSFA2       | 6.88E-03 | 436.7      | 401.1      | 537.5      | 494.6       | 595.5       | 607.8       | 600         |         |         |         |          |          |          |          |               |            |             |

Supplementary Table S1. Continued.

| ID           | Gene Symbol | p-value  | VW3_Saline | VW6_Saline | VW7_Saline | VW13_Saline | VW22_Saline | VW23_Saline | VW25_Saline | VW3_LPS | VW6_LPS | VW7_LPS | VW13_LPS | VW22_LPS | VW23_LPS | VW25_LPS | Median_saline | Median_LPS | Fold change |
|--------------|-------------|----------|------------|------------|------------|-------------|-------------|-------------|-------------|---------|---------|---------|----------|----------|----------|----------|---------------|------------|-------------|
| 220059_at    | STAP1       | 7.30E-05 | 57.3       | 72.6       | 145.1      | 245.4       | 102.7       | 43.1        | 123.3       | 149.9   | 513.3   | 927.0   | 916.1    | 363.9    | 92.7     | 545.9    | 102.7         | 513.3      | 5.0         |
| 226390_at    | STARD4      | 1.55E-05 | 186.5      | 200.7      | 183.5      | 155.6       | 216.2       | 142.9       | 232.1       | 436.4   | 488.2   | 699.3   | 377.3    | 470.9    | 340.7    | 676.9    | 186.5         | 470.9      | 2.5         |
| 206868_at    | STARD8      | 9.31E-03 | 115.4      | 102.1      | 134.4      | 150.0       | 147.0       | 101.8       | 137.9       | 152.9   | 110.9   | 177.9   | 165.6    | 198.7    | 169.1    | 176.2    | 134.4         | 169.1      | 1.3         |
| 200887_s_at  | STAT1       | 5.96E-04 | 849.5      | 1056.3     | 1488.6     | 1021.7      | 1098.3      | 972.8       | 1275.7      | 1285.0  | 1630.7  | 2555.6  | 2040.0   | 1418.6   | 1320.4   | 1981.5   | 1056.3        | 1630.7     | 1.5         |
| 209969_s_at  | STAT1       | 1.05E-04 | 369.8      | 567.7      | 445.5      | 361.5       | 398.6       | 247.2       | 321.6       | 691.0   | 866.2   | 1132.0  | 983.7    | 822.7    | 729.8    | 992.1    | 369.8         | 866.2      | 2.3         |
| 205170_at    | STAT2       | 8.89E-06 | 241.0      | 280.6      | 386.3      | 344.3       | 314.6       | 263.9       | 365.3       | 465.7   | 695.1   | 1050.1  | 779.5    | 664.3    | 599.8    | 898.9    | 314.6         | 695.1      | 2.2         |
| 217199_s_at  | STAT2       | 6.92E-04 | 36.6       | 37.5       | 54.2       | 59.5        | 60.6        | 38.9        | 46.8        | 63.4    | 49.5    | 92.6    | 89.2     | 87.6     | 93.9     | 98.6     | 46.8          | 89.2       | 1.9         |
| 225636_at    | STAT2       | 2.76E-04 | 3657.0     | 4126.6     | 4149.4     | 3864.2      | 3648.8      | 3427.9      | 3936.5      | 5164.7  | 6174.1  | 7566.3  | 5985.7   | 5118.4   | 5024.1   | 6881.4   | 3864.2        | 5985.7     | 1.5         |
| 208992_s_at  | STAT3       | 3.48E-03 | 1538.0     | 1320.1     | 1185.6     | 1364.0      | 1504.2      | 1110.2      | 1447.0      | 1746.2  | 1709.0  | 2182.0  | 1815.6   | 1974.8   | 2149.4   | 2228.3   | 1364.0        | 1974.8     | 1.4         |
| 225289_at    | STAT3       | 7.96E-03 | 469.3      | 392.8      | 487.0      | 551.5       | 613.7       | 535.5       | 716.8       | 649.9   | 559.9   | 757.3   | 624.8    | 692.6    | 706.0    | 821.3    | 535.5         | 692.6      | 1.3         |
| 243213_at    | STAT3       | 7.77E-03 | 48.5       | 52.6       | 71.3       | 71.3        | 66.5        | 60.5        | 65.1        | 63.3    | 55.3    | 151.2   | 91.2     | 81.7     | 106.8    | 125.3    | 65.1          | 91.2       | 1.4         |
| 206118_at    | STAT4       | 1.16E-05 | 57.3       | 55.0       | 57.7       | 79.6        | 94.2        | 42.4        | 45.9        | 267.0   | 507.7   | 1299.0  | 573.1    | 717.2    | 597.4    | 736.1    | 57.3          | 597.4      | 10.4        |
| 203986_at    | STBD1       | 2.83E-05 | 108.8      | 84.7       | 125.3      | 88.5        | 102.6       | 109.1       | 141.8       | 189.1   | 167.6   | 363.5   | 190.0    | 208.1    | 255.9    | 304.0    | 108.8         | 208.1      | 1.9         |
| 220187_at    | STEAP4      | 1.55E-04 | 7.0        | 18.2       | 12.3       | 22.6        | 10.8        | 19.7        | 22.6        | 35.3    | 61.0    | 197.2   | 52.2     | 116.2    | 111.7    | 139.5    | 18.2          | 111.7      | 6.1         |
| 225987_at    | STEAP4      | 1.46E-04 | 71.1       | 87.8       | 39.3       | 61.6        | 63.3        | 37.2        | 56.5        | 212.9   | 421.2   | 686.7   | 187.4    | 436.3    | 512.0    | 645.6    | 61.6          | 436.3      | 7.1         |
| 202693_s_at  | STK17A      | 4.38E-03 | 70.3       | 76.6       | 119.3      | 109.5       | 175.4       | 109.5       | 160.5       | 147.0   | 132.0   | 321.3   | 241.3    | 191.3    | 178.6    | 181.4    | 109.5         | 181.4      | 1.7         |
| 202695_s_at  | STK17A      | 8.58E-03 | 97.6       | 110.0      | 129.7      | 105.4       | 154.9       | 133.2       | 157.3       | 128.2   | 127.3   | 229.7   | 192.9    | 201.7    | 150.3    | 193.6    | 129.7         | 192.9      | 1.5         |
| 205214_at    | STK17B      | 6.08E-03 | 286.3      | 350.0      | 385.3      | 409.3       | 460.2       | 634.2       | 540.5       | 546.1   | 446.5   | 797.9   | 617.0    | 621.5    | 666.4    | 718.5    | 409.3         | 621.5      | 1.5         |
| 204068_at    | STK3        | 8.72E-03 | 328.2      | 312.3      | 421.2      | 482.0       | 534.6       | 474.1       | 568.3       | 463.5   | 679.9   | 1044.5  | 653.8    | 556.2    | 622.8    | 798.2    | 474.1         | 653.8      | 1.4         |
| 211078_s_at  | STK3        | 6.00E-03 | 39.8       | 48.6       | 62.1       | 59.8        | 80.3        | 76.3        | 69.6        | 94.3    | 74.9    | 150.4   | 93.0     | 93.4     | 89.8     | 93.2     | 62.1          | 93.2       | 1.5         |
| 223852_s_at  | STK40       | 2.51E-03 | 857.5      | 754.8      | 671.1      | 755.0       | 682.3       | 651.1       | 789.8       | 983.1   | 1024.0  | 1116.1  | 929.9    | 1322.4   | 1254.8   | 1236.4   | 754.8         | 1116.1     | 1.5         |
| 225015_s_at  | STK40       | 2.16E-03 | 121.1      | 85.9       | 134.0      | 138.7       | 116.9       | 118.3       | 135.7       | 149.2   | 126.4   | 218.9   | 155.3    | 212.8    | 229.6    | 213.9    | 121.1         | 212.8      | 1.8         |
| 201061_s_at  | STOM        | 4.37E-03 | 4735.5     | 4103.4     | 4607.0     | 3391.0      | 4769.9      | 3852.2      | 5272.8      | 6128.6  | 4745.3  | 5951.7  | 5117.3   | 5845.8   | 5974.3   | 6410.1   | 4607.0        | 5951.7     | 1.3         |
| 204701_s_at  | STOML1      | 3.26E-03 | 78.7       | 69.3       | 82.2       | 79.1        | 80.8        | 70.1        | 72.0        | 81.4    | 101.1   | 137.0   | 97.4     | 122.0    | 113.8    | 112.4    | 78.7          | 112.4      | 1.4         |
| 33736_at     | STOML1      | 4.25E-04 | 258.5      | 294.5      | 313.7      | 293.9       | 326.6       | 309.4       | 278.6       | 337.1   | 451.2   | 530.4   | 406.5    | 455.0    | 465.3    | 427.4    | 294.5         | 451.2      | 1.5         |
| 218666_s_at  | STX17       | 4.76E-04 | 157.5      | 182.5      | 250.7      | 231.9       | 251.8       | 265.1       | 248.1       | 268.1   | 313.0   | 527.9   | 360.7    | 352.8    | 346.2    | 387.9    | 248.1         | 352.8      | 1.4         |
| 222708_s_at  | STX17       | 1.40E-03 | 139.8      | 159.2      | 218.9      | 173.5       | 200.6       | 207.8       | 183.7       | 222.4   | 268.3   | 429.8   | 260.7    | 231.0    | 266.2    | 314.9    | 183.7         | 266.2      | 1.4         |
| 209287_at    | STX3        | 6.81E-03 | 237.6      | 220.2      | 343.6      | 278.5       | 351.0       | 275.2       | 342.8       | 308.1   | 353.7   | 582.3   | 321.9    | 407.4    | 329.3    | 450.5    | 278.5         | 353.7      | 1.3         |
| 214512_s_at  | SUB1        | 2.35E-03 | 1090.3     | 1025.7     | 1156.2     | 1256.9      | 1162.3      | 1204.0      | 1172.5      | 1367.9  | 1594.6  | 2178.9  | 1602.0   | 1614.9   | 1498.1   | 1663.1   | 1162.3        | 1602.0     | 1.4         |
| 224724_at    | SULF2       | 4.54E-03 | 39.7       | 42.0       | 26.8       | 27.0        | 35.1        | 29.4        | 24.4        | 87.9    | 56.3    | 65.3    | 52.0     | 178.5    | 35.3     | 129.9    | 29.4          | 65.3       | 2.2         |
| 222978_at    | SURF4       | 8.29E-03 | 1246.2     | 1064.5     | 1021.8     | 1073.2      | 1057.9      | 983.2       | 1043.9      | 1418.9  | 1198.7  | 1340.1  | 1244.8   | 1451.5   | 1541.6   | 1390.3   | 1057.9        | 1390.3     | 1.3         |
| 222979_s_at  | SURF4       | 3.87E-03 | 260.7      | 297.9      | 278.1      | 271.1       | 280.6       | 274.6       | 304.4       | 369.5   | 342.7   | 476.4   | 446.3    | 335.8    | 364.0    | 390.4    | 278.1         | 369.5      | 1.3         |
| 226264_at    | SUSD1       | 2.96E-03 | 1561.2     | 1251.9     | 899.4      | 1213.3      | 1750.9      | 839.9       | 1839.2      | 2198.6  | 2164.6  | 2960.0  | 2049.9   | 2674.3   | 2161.3   | 2258.5   | 1251.9        | 2198.6     | 1.8         |
| 1560879_q_at | SYT15       | 9.60E-03 | 49.6       | 48.2       | 49.1       | 46.1        | 50.9        | 53.0        | 55.6        | 51.7    | 54.7    | 71.4    | 54.5     | 77.1     | 72.7     | 78.3     | 49.6          | 71.4       | 1.4         |
| 242109_at    | SYTL3       | 4.38E-04 | 69.5       | 79.5       | 106.8      | 85.5        | 82.3        | 89.0        | 78.4        | 143.2   | 117.1   | 278.2   | 130.1    | 120.8    | 150.7    | 165.9    | 82.3          | 143.2      | 1.7         |
| 1552541_at   | TAGAP       | 2.28E-04 | 128.8      | 80.3       | 116.7      | 104.0       | 109.3       | 90.4        | 118.1       | 166.9   | 195.4   | 475.9   | 254.8    | 281.8    | 277.9    | 335.4    | 109.3         | 277.9      | 2.5         |
| 1552542_s_at | TAGAP       | 1.58E-04 | 87.6       | 52.2       | 69.5       | 78.7        | 89.9        | 64.9        | 70.8        | 187.3   | 114.2   | 430.4   | 203.9    | 213.0    | 221.5    | 313.3    | 70.8          | 213.0      | 3.0         |
| 229723_at    | TAGAP       | 3.86E-04 | 165.4      | 139.4      | 198.4      | 250.4       | 290.0       | 185.2       | 310.6       | 335.2   | 470.2   | 1211.4  | 648.0    | 556.1    | 361.8    | 801.1    | 198.4         | 556.1      | 2.8         |
| 207616_s_at  | TANK        | 5.18E-04 | 1098.2     | 907.8      | 1037.4     | 945.9       | 1217.5      | 996.8       | 1286.4      | 1399.2  | 1894.6  | 2236.9  | 1469.1   | 1818.2   | 1647.6   | 2146.4   | 1037.4        | 1818.2     | 1.8         |
| 209451_at    | TANK        | 4.36E-03 | 94.6       | 87.2       | 160.2      | 143.9       | 168.8       | 175.0       | 217.3       | 148.2   | 204.8   | 469.1   | 248.0    | 203.0    | 219.2    | 309.5    | 160.2         | 219.2      | 1.4         |
| 210458_s_at  | TANK        | 4.15E-04 | 520.9      | 394.6      | 516.5      | 500.8       | 603.7       | 564.4       | 681.5       | 738.4   | 895.6   | 1182.8  | 807.1    | 876.6    | 914.9    | 1175.9   | 520.9         | 895.6      | 1.7         |
| 202307_s_at  | TAP1        | 1.84E-05 | 862.1      | 806.3      | 869.5      | 832.6       | 998.3       | 532.9       | 918.4       | 1760.3  | 2154.3  | 2718.9  | 1986.4   | 2218.2   | 1979.5   | 2697.2   | 862.1         | 2154.3     | 2.5         |
| 204769_s_at  | TAP2        | 3.93E-03 | 93.3       | 157.4      | 173.1      | 135.0       | 180.3       | 122.7       | 183.7       | 146.5   | 176.2   | 321.6   | 170.6    | 212.8    | 216.6    | 293.5    | 157.4         | 212.8      | 1.4         |
| 204770_at    | TAP2        | 7.26E-04 | 147.2      | 150.5      | 167.0      | 199.6       | 164.4       | 152.6       | 140.9       | 277.2   | 169.5   | 359.6   | 431.4    | 261.0    | 247.2    | 269.0    | 152.6         | 269.0      | 1.8         |
| 208428_at    | TAP2        | 1.44E-03 | 88.8       | 41.9       | 43.9       | 40.3        | 41.6        | 41.8        | 89.9        | 126.7   | 51.1    | 69.9    | 80.3     | 51.6     | 71.2     | 141.9    | 41.9          | 71.2       | 1.7         |
| 225973_at    | TAP2        | 2.72E-04 | 221.0      | 373.0      | 496.5      | 606.1       | 375.9       | 326.8       | 368.0       | 411.5   | 487.2   | 1012.2  | 1086.7   | 530.0    | 588.9    | 700.0    | 373.0         | 588.9      | 1.6         |
| 210294_at    | TAPBP       | 1.64E-04 | 82.5       | 76.7       | 110.2      | 111.2       | 122.8       | 80.2        | 130.9       | 151.2   | 135.4   | 260.5   | 195.6    | 168.5    | 151.7    | 214.6    | 110.2         | 168.5      | 1.5         |
| 212350_at    | TBC1D1      | 6.21E-03 | 689.5      | 459.7      | 610.8      | 570.6       | 672.7       | 434.1       | 605.7       | 749.3   | 595.5   | 851.2   | 637.6    | 926.5    | 664.2    | 833.6    | 605.7         | 749.3      | 1.2         |
| 214013_s_at  | TBC1D1      | 1.16E-03 | 72.1       | 63.6       | 68.7       | 74.4        | 79.6        | 62.7        | 85.6        | 103.9   | 81.0    | 118.1   | 110.6    | 129.7    | 103.3    | 100.9    | 72.1          | 103.9      | 1.4         |
| 1554701_a_at | TBC1D16     | 4.20E-03 | 77.9       | 77.6       | 90.2       | 81.1        | 91.2        | 60.2        | 81.7        | 100.2   | 87.8    | 132.0   | 129.9    | 117.2    | 134.1    | 128.4    | 81.1          | 128.4      | 1.6         |
| 222116_s_at  | TBC1D16     | 4.17E-03 | 169.9      | 191.2      | 146.7      | 194.0       | 194.7       | 131.0       | 182.0       | 232.0   | 214.7   | 314.5   | 288.6    | 233.6    | 257.3    | 290.0    | 182.0         | 257.3      | 1.4         |
| 216549_s_at  | TBC1D22B    | 2.82E-03 | 36.7       | 41.1       | 63.4       | 56.6        | 63.5        | 68.4        | 67.9        | 81.8    | 46.4    | 104.4   | 83.6     | 130.7    | 86.1     | 103.6    | 63.4          | 86.1       | 1.4         |
| 223375_at    | TBC1D22B    | 1.24E-03 | 256.6      | 241.6      | 278.6      | 226.0       | 305.7       | 290.3       | 354.3       | 334.5   | 384.4   | 565.8   | 348.4    | 390.9    | 425.2    | 489.2    | 278.6         | 390.9      | 1.4         |
| 212956_at    | TBC1D9      | 1.11E-03 | 1393.3     | 1450.7     | 2055.4     | 1731.3      | 2210.7      | 1766.9      | 2517.5      | 2052.8  | 2884.3  | 5254.9  | 3804.2   | 2880.3   | 2938.4   | 3476.7   | 1766.9        | 2938.4     | 1.7         |
| 212960_at    | TBC1D9      | 4.07E-05 | 168.9      | 151.1      | 183.9      | 187.8       | 219.1       | 190.6       | 233.3       | 355.8   | 293.2   | 613.8   | 397.3    | 546.4    | 559.9    | 453.4    | 187.8         | 453.4      | 2.4         |
| 218520_at    | TBK1        | 8.13E-04 | 331.3      | 437.6      | 575.7      | 590.5       | 594.4       | 508.0       | 696.8       | 612.2   | 810.3   | 1304.1  | 937.5    | 721.1    | 833.2    | 980.1    | 575.7         | 833.2      | 1.4         |
| 220684_at    | TBX21       | 2.06E-03 | 64.3       | 69.0       | 66.2       | 66.1        | 56.2        | 66.1        | 54.8        | 88.8    | 91.1    | 99.5    | 173.0    | 81.2     | 103.8    | 85.1     | 66.1          | 91.1       | 1.4         |
| 203753_at    | TCF4        | 2.42E-06 | 94.6       | 63.1       | 98.1       | 93.3        | 89.1        | 59.2        | 100.1       | 356.1   | 324.6   | 677.4   | 455.7    | 463.5    | 303.7    | 685.3    | 93.3          | 455.7      | 4.9         |
| 212382_at    | TCF4        | 7.57E-06 | 330.2      | 182.8      | 309.3      | 281.4       | 212.6       | 192.8       | 270.6       | 1005.0  | 1364.3  | 2136.2  | 13       |          |          |          |               |            |             |



TRANSCRIPTION PROFILES IN ALVEOLAR MACROPHAGES

Supplementary Table S1. Continued.

| ID           | Gene Symbol | p-value  | VW3_Saline | VW6_Saline | VW7_Saline | VW13_Saline | VW22_Saline | VW23_Saline | VW25_Saline | VW3_LPS | VW6_LPS | VW7_LPS | VW13_LPS | VW22_LPS | VW23_LPS | VW25_LPS | Median_saline | Median_LPS | Fold change |
|--------------|-------------|----------|------------|------------|------------|-------------|-------------|-------------|-------------|---------|---------|---------|----------|----------|----------|----------|---------------|------------|-------------|
| 213361_at    | TDRD7       | 1.46E-04 | 1646.0     | 1742.7     | 1254.8     | 1297.4      | 1391.0      | 1525.6      | 1506.8      | 2302.7  | 3516.5  | 4054.0  | 2728.8   | 2946.7   | 3464.4   | 3649.6   | 1506.8        | 3464.4     | 2.3         |
| 229790_at    | TERF2       | 2.02E-03 | 70.4       | 76.6       | 100.8      | 102.0       | 95.4        | 82.9        | 96.6        | 110.6   | 106.4   | 159.3   | 126.2    | 117.1    | 110.8    | 122.8    | 95.4          | 117.1      | 1.2         |
| 202719_s_at  | TES         | 8.23E-03 | 571.7      | 440.8      | 303.6      | 416.7       | 445.7       | 264.9       | 266.5       | 609.1   | 503.9   | 507.6   | 542.1    | 628.6    | 595.9    | 469.2    | 416.7         | 542.1      | 1.3         |
| 1569385_s_at | TET2        | 2.20E-03 | 381.3      | 315.4      | 390.9      | 359.4       | 415.7       | 396.1       | 327.9       | 456.7   | 397.2   | 594.0   | 467.6    | 601.7    | 532.2    | 576.5    | 381.3         | 532.2      | 1.4         |
| 204147_s_at  | TFDP1       | 9.28E-03 | 163.0      | 160.7      | 182.1      | 175.2       | 188.5       | 160.6       | 166.2       | 259.4   | 169.3   | 213.2   | 210.2    | 243.0    | 224.9    | 226.4    | 166.2         | 224.9      | 1.4         |
| 242939_at    | TFDP1       | 3.68E-03 | 237.0      | 143.4      | 238.9      | 262.2       | 256.7       | 282.3       | 326.3       | 271.2   | 347.1   | 667.0   | 470.6    | 390.8    | 362.2    | 514.1    | 256.7         | 390.8      | 1.5         |
| 1565347_s_at | TFE3        | 7.13E-03 | 120.8      | 79.8       | 92.7       | 100.7       | 98.6        | 97.2        | 132.0       | 138.2   | 116.6   | 133.2   | 138.5    | 138.6    | 136.3    | 133.9    | 98.6          | 136.3      | 1.4         |
| 206715_at    | TFCF        | 8.24E-04 | 811.9      | 878.7      | 928.8      | 875.7       | 1027.2      | 873.7       | 1030.3      | 1347.2  | 1548.5  | 2263.3  | 1548.7   | 1367.8   | 1220.7   | 1505.9   | 878.7         | 1505.9     | 1.7         |
| 217839_at    | TFG         | 3.59E-03 | 634.7      | 601.0      | 672.6      | 717.8       | 739.4       | 655.4       | 818.5       | 795.7   | 993.9   | 1272.0  | 968.3    | 863.3    | 868.0    | 1094.1   | 672.6         | 968.3      | 1.4         |
| 221871_s_at  | TFG         | 2.19E-03 | 364.5      | 331.4      | 339.5      | 351.0       | 375.5       | 342.1       | 403.3       | 491.5   | 523.7   | 667.8   | 545.1    | 424.1    | 467.5    | 572.5    | 351.0         | 523.7      | 1.5         |
| 209278_s_at  | TFPI2       | 2.19E-03 | 35.6       | 40.3       | 20.4       | 25.4        | 24.0        | 24.1        | 29.1        | 55.7    | 97.5    | 156.1   | 56.2     | 66.3     | 34.5     | 113.3    | 25.4          | 66.3       | 2.6         |
| 226625_at    | TGFBR3      | 9.35E-03 | 113.1      | 134.1      | 68.2       | 76.1        | 52.4        | 64.8        | 74.1        | 135.0   | 170.2   | 163.1   | 129.2    | 59.8     | 80.1     | 121.2    | 74.1          | 129.2      | 1.7         |
| 218724_s_at  | TGIF2       | 3.69E-03 | 60.5       | 44.2       | 74.8       | 62.0        | 66.3        | 57.0        | 67.0        | 102.3   | 46.2    | 130.9   | 88.6     | 101.4    | 75.1     | 87.1     | 62.0          | 88.6       | 1.4         |
| 213191_at    | TICAM1      | 2.74E-04 | 120.9      | 83.9       | 123.5      | 136.4       | 158.3       | 126.7       | 174.8       | 188.6   | 220.8   | 383.4   | 217.0    | 289.8    | 316.5    | 327.2    | 126.7         | 289.8      | 2.3         |
| 1552280_at   | TIMD4       | 2.95E-04 | 35.4       | 116.2      | 46.9       | 27.9        | 44.5        | 31.0        | 23.8        | 79.5    | 219.9   | 93.1    | 42.2     | 63.5     | 83.2     | 64.6     | 35.4          | 79.5       | 2.2         |
| 201821_s_at  | TIMM17A     | 5.16E-03 | 443.0      | 429.0      | 537.1      | 675.0       | 513.6       | 455.7       | 572.3       | 538.0   | 642.1   | 818.6   | 881.7    | 696.5    | 585.7    | 611.5    | 513.6         | 642.1      | 1.3         |
| 201666_at    | TIMP1       | 3.01E-04 | 275.2      | 256.9      | 302.2      | 500.2       | 562.3       | 381.5       | 462.2       | 919.7   | 475.4   | 606.5   | 813.2    | 2621.1   | 1001.3   | 1491.7   | 381.5         | 919.7      | 2.4         |
| 219258_at    | TIPIN       | 3.72E-03 | 68.3       | 66.1       | 107.5      | 87.9        | 80.8        | 79.8        | 108.5       | 101.1   | 85.1    | 165.4   | 108.1    | 105.7    | 92.3     | 135.4    | 80.8          | 105.7      | 1.3         |
| 1554351_a_at | TIPRL       | 2.70E-03 | 611.7      | 595.5      | 714.1      | 737.7       | 766.9       | 818.9       | 837.3       | 1010.9  | 850.1   | 1230.9  | 937.3    | 1048.8   | 950.4    | 1062.1   | 737.7         | 1010.9     | 1.4         |
| 202011_at    | TJP1        | 3.91E-04 | 173.6      | 215.4      | 639.2      | 282.1       | 317.0       | 489.3       | 208.1       | 272.2   | 535.9   | 1191.5  | 462.4    | 444.7    | 910.5    | 549.2    | 282.1         | 535.9      | 1.9         |
| 214168_s_at  | TJP1        | 1.72E-03 | 45.9       | 36.9       | 62.8       | 44.3        | 54.1        | 61.8        | 42.8        | 57.6    | 81.5    | 186.0   | 59.8     | 82.0     | 127.8    | 76.1     | 45.9          | 81.5       | 1.8         |
| 216997_x_at  | TLE4        | 1.01E-03 | 177.9      | 128.9      | 196.6      | 223.8       | 196.7       | 178.5       | 194.4       | 240.3   | 238.5   | 386.4   | 261.4    | 293.9    | 301.7    | 321.0    | 194.4         | 293.9      | 1.5         |
| 233575_s_at  | TLE4        | 2.70E-04 | 167.4      | 138.1      | 237.5      | 229.7       | 220.4       | 192.8       | 230.1       | 271.6   | 238.6   | 417.0   | 316.1    | 320.7    | 357.3    | 321.7    | 220.4         | 320.7      | 1.6         |
| 212986_s_at  | TLK2        | 1.48E-04 | 133.8      | 128.0      | 179.3      | 204.9       | 180.4       | 169.0       | 187.5       | 240.0   | 240.4   | 362.0   | 283.5    | 284.0    | 293.1    | 328.8    | 179.3         | 284.0      | 1.5         |
| 212997_s_at  | TLK2        | 1.10E-03 | 565.1      | 645.4      | 685.5      | 678.1       | 704.1       | 729.9       | 749.2       | 780.5   | 1062.4  | 1259.5  | 995.3    | 880.7    | 943.6    | 1099.9   | 685.5         | 995.3      | 1.5         |
| 233349_at    | TLK2        | 2.61E-03 | 575.4      | 524.0      | 673.1      | 594.3       | 594.9       | 668.4       | 713.4       | 735.7   | 872.6   | 1164.4  | 798.4    | 693.7    | 864.2    | 1006.6   | 594.9         | 864.2      | 1.5         |
| 210176_at    | TLR1        | 2.38E-03 | 513.2      | 421.3      | 602.8      | 571.7       | 713.6       | 555.7       | 784.8       | 795.1   | 663.3   | 994.6   | 945.1    | 760.4    | 847.5    | 967.4    | 571.7         | 847.5      | 1.5         |
| 204924_at    | TLR2        | 1.46E-04 | 881.7      | 274.0      | 1055.8     | 952.9       | 1266.3      | 564.2       | 997.6       | 1902.3  | 1478.2  | 2727.1  | 2189.6   | 2510.6   | 2060.7   | 2475.0   | 952.9         | 2189.6     | 2.3         |
| 220146_at    | TLR7        | 2.97E-03 | 419.5      | 544.5      | 827.1      | 723.8       | 961.0       | 927.9       | 751.3       | 821.2   | 1099.8  | 1778.1  | 1095.7   | 1013.1   | 1267.7   | 1074.4   | 751.3         | 1095.7     | 1.5         |
| 222925_s_at  | TLR7        | 1.09E-03 | 273.1      | 197.2      | 306.5      | 263.9       | 310.0       | 319.0       | 271.1       | 341.2   | 413.0   | 573.5   | 362.4    | 408.5    | 545.1    | 489.3    | 273.1         | 413.0      | 1.5         |
| 209149_s_at  | TM9SF1      | 1.96E-04 | 240.1      | 160.7      | 264.4      | 241.3       | 253.6       | 255.4       | 261.0       | 336.5   | 283.5   | 434.5   | 371.5    | 419.5    | 403.2    | 359.7    | 253.6         | 371.5      | 1.5         |
| 212194_s_at  | TM9SF4      | 2.33E-04 | 149.5      | 142.1      | 213.3      | 230.4       | 240.4       | 174.4       | 229.1       | 323.1   | 228.2   | 373.1   | 308.8    | 398.9    | 343.9    | 362.5    | 213.3         | 343.9      | 1.6         |
| 212198_s_at  | TM9SF4      | 2.04E-03 | 620.4      | 570.0      | 481.9      | 517.5       | 710.1       | 583.7       | 599.4       | 1036.9  | 631.4   | 640.6   | 741.0    | 972.4    | 928.6    | 837.3    | 583.7         | 837.3      | 1.4         |
| 1552302_at   | TMEM106A    | 1.49E-05 | 213.3      | 164.1      | 265.2      | 207.4       | 242.2       | 184.8       | 245.9       | 428.8   | 595.8   | 972.4   | 576.9    | 612.7    | 694.3    | 732.6    | 213.3         | 612.7      | 2.9         |
| 1552303_a_at | TMEM106A    | 9.42E-05 | 82.7       | 74.6       | 73.6       | 63.4        | 73.7        | 63.1        | 78.4        | 124.6   | 142.7   | 246.7   | 169.0    | 194.4    | 159.3    | 181.0    | 73.7          | 169.0      | 2.3         |
| 234580_at    | TMEM106A    | 3.03E-04 | 97.2       | 84.7       | 97.0       | 96.7        | 113.0       | 85.2        | 102.4       | 156.9   | 113.6   | 300.8   | 209.6    | 245.5    | 183.5    | 228.1    | 97.0          | 209.6      | 2.2         |
| 213851_at    | TMEM110     | 2.07E-05 | 182.0      | 247.9      | 257.9      | 261.5       | 231.4       | 238.3       | 237.0       | 542.1   | 651.7   | 817.0   | 572.9    | 1028.7   | 585.5    | 934.4    | 238.3         | 651.7      | 2.7         |
| 227078_at    | TMEM110     | 2.60E-04 | 127.3      | 170.9      | 183.2      | 211.9       | 176.9       | 195.6       | 190.0       | 266.3   | 246.8   | 339.4   | 310.1    | 352.1    | 284.0    | 386.7    | 183.2         | 310.1      | 1.7         |
| 227127_at    | TMEM110     | 1.84E-04 | 99.0       | 110.3      | 130.4      | 117.5       | 99.5        | 113.4       | 102.5       | 169.2   | 166.9   | 237.8   | 183.6    | 214.9    | 215.2    | 269.2    | 110.3         | 214.9      | 1.9         |
| 223113_at    | TMEM138     | 9.92E-03 | 411.2      | 369.2      | 455.0      | 471.2       | 461.1       | 396.8       | 473.8       | 639.2   | 390.4   | 634.5   | 592.7    | 583.4    | 512.6    | 539.8    | 455.0         | 583.4      | 1.3         |
| 218999_at    | TMEM140     | 5.00E-03 | 1403.4     | 1472.3     | 896.2      | 1059.3      | 770.5       | 614.6       | 765.7       | 1571.1  | 1906.0  | 1956.2  | 1195.3   | 1430.5   | 1321.0   | 1621.0   | 896.2         | 1571.1     | 1.8         |
| 238063_at    | TMEM154     | 4.66E-04 | 44.1       | 29.7       | 50.4       | 74.4        | 64.4        | 42.4        | 52.7        | 78.5    | 124.6   | 299.4   | 121.1    | 159.7    | 126.7    | 228.9    | 50.4          | 126.7      | 2.5         |
| 226825_s_at  | TMEM165     | 4.76E-03 | 528.5      | 454.5      | 428.0      | 497.2       | 574.1       | 493.6       | 559.3       | 688.6   | 507.8   | 576.9   | 695.0    | 922.9    | 648.6    | 657.4    | 497.2         | 657.4      | 1.3         |
| 226827_at    | TMEM165     | 3.05E-03 | 492.2      | 542.6      | 479.2      | 570.9       | 612.8       | 491.7       | 620.5       | 740.2   | 647.5   | 751.5   | 749.8    | 752.6    | 767.5    | 745.3    | 542.6         | 749.8      | 1.4         |
| 228505_s_at  | TMEM170A    | 7.79E-04 | 265.7      | 267.4      | 372.9      | 377.2       | 411.6       | 392.6       | 406.8       | 373.0   | 416.6   | 685.0   | 509.8    | 560.3    | 515.7    | 615.2    | 377.2         | 515.7      | 1.4         |
| 230414_s_at  | TMEM170A    | 2.19E-03 | 223.0      | 239.8      | 267.8      | 277.8       | 307.6       | 277.3       | 300.4       | 317.4   | 282.1   | 461.3   | 325.9    | 435.5    | 425.3    | 448.3    | 277.3         | 425.3      | 1.5         |
| 1553559_at   | TMEM171     | 5.84E-06 | 44.2       | 47.8       | 40.3       | 46.5        | 42.9        | 42.3        | 45.2        | 253.2   | 378.0   | 661.0   | 235.1    | 333.3    | 354.8    | 426.7    | 44.2          | 354.8      | 8.0         |
| 240770_at    | TMEM171     | 1.43E-05 | 28.1       | 23.9       | 14.6       | 18.2        | 15.6        | 8.0         | 23.5        | 163.7   | 301.2   | 736.2   | 241.7    | 195.3    | 201.5    | 322.3    | 18.2          | 241.7      | 13.3        |
| 219253_at    | TMEM185B    | 1.57E-03 | 227.7      | 223.1      | 247.4      | 261.7       | 269.0       | 205.0       | 302.7       | 365.5   | 278.4   | 549.8   | 387.0    | 380.2    | 344.4    | 399.8    | 247.4         | 380.2      | 1.5         |
| 212619_at    | TMEM194A    | 7.73E-05 | 110.2      | 97.0       | 146.0      | 119.1       | 145.4       | 173.0       | 147.1       | 196.9   | 191.3   | 364.0   | 224.0    | 239.1    | 284.8    | 253.1    | 145.4         | 239.1      | 1.6         |
| 212621_at    | TMEM194A    | 1.17E-03 | 246.1      | 208.8      | 274.2      | 269.1       | 359.7       | 368.0       | 281.3       | 311.0   | 397.8   | 710.1   | 454.9    | 477.3    | 585.5    | 536.7    | 274.2         | 477.3      | 1.7         |
| 222736_s_at  | TMEM38B     | 2.75E-03 | 369.6      | 362.7      | 529.0      | 405.2       | 499.7       | 362.2       | 579.6       | 517.2   | 505.6   | 971.0   | 504.5    | 684.8    | 644.2    | 675.1    | 405.2         | 644.2      | 1.6         |
| 222418_s_at  | TMEM43      | 7.44E-03 | 383.6      | 396.2      | 344.8      | 316.8       | 375.6       | 376.6       | 397.4       | 464.5   | 409.2   | 455.3   | 471.8    | 485.6    | 479.9    | 556.2    | 376.6         | 471.8      | 1.3         |
| 218776_s_at  | TMEM62      | 7.19E-03 | 464.5      | 343.4      | 512.8      | 528.8       | 467.2       | 633.5       | 533.9       | 604.1   | 618.1   | 736.6   | 688.5    | 564.5    | 685.8    | 693.5    | 512.8         | 685.8      | 1.3         |
| 229452_at    | TMEM88      | 7.73E-05 | 62.2       | 45.9       | 80.0       | 78.1        | 105.6       | 85.5        | 86.1        | 110.4   | 86.7    | 204.4   | 125.2    | 228.3    | 141.0    | 176.7    | 80.0          | 141.0      | 1.8         |
| 201645_at    | TNC         | 1.75E-05 | 30.0       | 35.1       | 31.4       | 26.8        | 61.0        | 18.2        | 28.3        | 63.4    | 101.1   | 123.6   | 143.6    | 237.7    | 73.4     | 114.7    | 30.0          | 114.7      | 3.8         |
| 207113_s_at  | TNF         | 1.89E-05 | 296.6      | 154.6      | 306.0      | 277.6       | 573.8       | 257.0       | 503.6       | 1360.7  | 1872.7  | 3700.4  | 1473.8   | 2089.9   | 2089.8   | 2734.0   | 296.6         | 2089.8     | 7.0         |
| 202509_s_at  | TNFAIP2     | 1.49E-04 | 181.7      | 146.9      | 193.2      | 201.3       | 217.3       | 147.3       | 203.3       | 280.7   | 249.2   | 516.8   | 356.5    | 429.4    | 394.6    | 401.9    | 193.2         | 394.6      | 2.0         |
| 202510_s_at  | TNFAIP2     | 2.76E-04 | 3166.2     | 2993.3     | 3560.1     | 2871.6      | 3742        |             |             |         |         |         |          |          |          |          |               |            |             |

Supplementary Table S1. Continued.

| ID           | Gene Symbol | p-value  | VW3_Saline | VW6_Saline | VW7_Saline | VW13_Saline | VW22_Saline | VW23_Saline | VW25_Saline | VW3_LPS | VW6_LPS | VW7_LPS | VW13_LPS | VW22_LPS | VW23_LPS | VW25_LPS | Median_saline | Median_LPS | Fold change |
|--------------|-------------|----------|------------|------------|------------|-------------|-------------|-------------|-------------|---------|---------|---------|----------|----------|----------|----------|---------------|------------|-------------|
| 231775_at    | TNFRSF10A   | 9.76E-04 | 230.7      | 220.6      | 257.3      | 216.3       | 188.9       | 264.2       | 341.3       | 336.3   | 455.0   | 563.9   | 306.2    | 279.6    | 338.6    | 678.2    | 230.7         | 338.6      | 1.5         |
| 209294_x_at  | TNFRSF10B   | 9.85E-03 | 273.0      | 293.5      | 286.2      | 311.4       | 284.2       | 307.8       | 306.3       | 394.5   | 296.7   | 365.7   | 377.3    | 423.1    | 403.3    | 377.6    | 293.5         | 377.6      | 1.3         |
| 206222_at    | TNFRSF10C   | 7.45E-03 | 89.1       | 57.5       | 86.3       | 62.4        | 90.5        | 75.8        | 67.3        | 92.8    | 151.4   | 240.9   | 68.2     | 163.4    | 118.0    | 209.8    | 75.8          | 151.4      | 2.0         |
| 203508_at    | TNFRSF1B    | 3.04E-03 | 851.9      | 826.3      | 1089.6     | 997.5       | 1136.0      | 941.4       | 787.4       | 1478.7  | 1390.2  | 1472.1  | 1095.3   | 2846.1   | 1707.3   | 2348.5   | 941.4         | 1478.7     | 1.6         |
| 207536_s_at  | TNFRSF9     | 4.39E-04 | 79.1       | 68.2       | 51.9       | 56.4        | 56.4        | 52.7        | 107.9       | 98.8    | 94.6    | 78.1    | 105.9    | 89.0     | 106.6    | 56.4     | 98.8          | 98.8       | 1.8         |
| 202687_s_at  | TNFSF10     | 8.98E-06 | 817.2      | 823.4      | 783.7      | 859.4       | 700.8       | 593.3       | 502.0       | 2667.2  | 3910.6  | 4905.3  | 2915.0   | 3412.1   | 2540.6   | 4013.1   | 783.7         | 3412.1     | 4.4         |
| 202688_at    | TNFSF10     | 8.78E-06 | 285.4      | 207.7      | 284.0      | 329.5       | 287.9       | 225.3       | 225.2       | 1264.6  | 1742.6  | 2603.8  | 1290.7   | 1494.8   | 1065.1   | 2140.7   | 284.0         | 1494.8     | 5.3         |
| 214329_x_at  | TNFSF10     | 2.66E-05 | 34.2       | 34.8       | 80.1       | 65.9        | 69.0        | 51.3        | 61.9        | 173.0   | 309.8   | 727.1   | 338.6    | 195.7    | 177.7    | 475.8    | 61.9          | 309.8      | 5.0         |
| 223501_at    | TNFSF13B    | 7.16E-04 | 969.7      | 1025.4     | 1374.9     | 1198.9      | 1205.5      | 1326.3      | 1233.8      | 1813.6  | 1844.9  | 2493.2  | 2191.8   | 1390.7   | 1827.7   | 2049.4   | 1205.5        | 1844.9     | 1.5         |
| 223502_s_at  | TNFSF13B    | 1.21E-05 | 849.6      | 850.5      | 909.0      | 895.1       | 919.5       | 807.2       | 746.5       | 1836.1  | 1781.8  | 2181.3  | 2031.3   | 1765.6   | 1692.6   | 2122.1   | 850.5         | 1836.1     | 2.2         |
| 207907_at    | TNFSF14     | 8.97E-03 | 79.7       | 44.4       | 49.8       | 60.6        | 63.2        | 48.8        | 58.4        | 75.5    | 61.5    | 75.2    | 69.3     | 100.8    | 82.5     | 106.0    | 58.4          | 75.5       | 1.3         |
| 207216_at    | TNFSF8      | 7.81E-05 | 66.6       | 45.5       | 52.5       | 69.2        | 68.6        | 49.8        | 52.2        | 192.9   | 103.7   | 210.2   | 202.0    | 405.0    | 143.7    | 363.1    | 52.5          | 202.0      | 3.9         |
| 206907_at    | TNFSF9      | 5.12E-04 | 86.9       | 70.5       | 133.0      | 90.7        | 124.8       | 135.2       | 95.5        | 167.1   | 379.4   | 927.0   | 214.4    | 373.6    | 240.5    | 403.1    | 95.5          | 373.6      | 3.9         |
| 211828_s_at  | TNFK        | 2.49E-04 | 156.6      | 122.5      | 211.6      | 221.9       | 331.3       | 204.7       | 294.5       | 316.0   | 441.9   | 852.1   | 557.4    | 498.7    | 599.5    | 595.9    | 211.6         | 557.4      | 2.6         |
| 213107_at    | TNFK        | 1.35E-03 | 560.6      | 324.0      | 522.9      | 520.1       | 751.2       | 458.1       | 646.0       | 767.7   | 882.4   | 1332.1  | 1080.2   | 860.9    | 1014.8   | 1166.6   | 522.9         | 1014.8     | 1.9         |
| 213109_at    | TNFK        | 5.52E-04 | 282.4      | 150.9      | 342.8      | 336.0       | 478.0       | 313.4       | 409.8       | 536.4   | 746.1   | 1431.0  | 980.4    | 652.5    | 1032.9   | 941.8    | 336.0         | 941.8      | 2.8         |
| 239288_at    | TNFK        | 1.25E-04 | 173.6      | 136.1      | 190.0      | 152.9       | 304.5       | 143.7       | 225.2       | 303.8   | 486.9   | 780.2   | 552.7    | 550.4    | 627.4    | 696.8    | 173.6         | 552.7      | 3.2         |
| 207196_s_at  | TNIP1       | 1.22E-05 | 372.5      | 191.4      | 309.7      | 310.0       | 513.6       | 265.7       | 530.7       | 933.2   | 977.7   | 1584.2  | 1071.9   | 1810.9   | 1605.8   | 1885.0   | 310.0         | 1584.2     | 5.1         |
| 218335_x_at  | TNIP2       | 8.35E-03 | 1575.5     | 1307.9     | 1401.2     | 1505.8      | 1334.5      | 1288.5      | 1413.7      | 1650.0  | 1615.6  | 1820.9  | 1767.0   | 1916.5   | 1904.2   | 1849.3   | 1401.2        | 1820.9     | 1.3         |
| 232160_s_at  | TNIP2       | 5.94E-03 | 1604.6     | 1405.0     | 1325.4     | 1571.0      | 1368.4      | 1325.5      | 1415.5      | 1941.2  | 1683.2  | 1748.6  | 1697.1   | 1931.8   | 1980.4   | 1961.0   | 1405.0        | 1931.8     | 1.4         |
| 48531_at     | TNIP2       | 6.65E-03 | 2081.8     | 1823.4     | 1637.9     | 1742.4      | 1698.7      | 1640.5      | 1694.8      | 2343.8  | 2098.4  | 2021.1  | 2114.3   | 2357.6   | 2442.3   | 2445.9   | 1698.7        | 2343.8     | 1.4         |
| 220655_at    | TNIP3       | 2.98E-03 | 1115.3     | 158.4      | 848.9      | 874.6       | 2645.6      | 491.5       | 3126.2      | 3100.1  | 5278.4  | 5870.9  | 4508.5   | 4297.5   | 5197.7   | 6415.9   | 874.6         | 5197.7     | 5.9         |
| 215389_s_at  | TNNT2       | 1.63E-03 | 46.4       | 29.0       | 37.2       | 45.5        | 54.3        | 35.3        | 41.9        | 62.3    | 41.7    | 57.9    | 57.2     | 64.2     | 49.6     | 57.9     | 41.9          | 57.9       | 1.4         |
| 229257_at    | TNRC18      | 2.49E-03 | 123.1      | 104.8      | 91.6       | 114.5       | 103.7       | 106.0       | 103.9       | 145.7   | 164.7   | 165.7   | 174.5    | 131.5    | 137.2    | 137.8    | 104.8         | 145.7      | 1.4         |
| 208900_s_at  | TOP1        | 2.60E-03 | 508.4      | 501.5      | 592.6      | 713.2       | 625.2       | 674.0       | 612.6       | 778.6   | 768.0   | 945.1   | 807.3    | 830.1    | 817.1    | 847.3    | 612.6         | 817.1      | 1.3         |
| 202348_s_at  | TOR1A       | 4.61E-03 | 1129.5     | 1048.5     | 945.6      | 918.7       | 964.0       | 901.1       | 916.0       | 1329.2  | 1244.7  | 1242.5  | 1068.0   | 1306.1   | 1281.0   | 1291.4   | 945.6         | 1281.0     | 1.4         |
| 223929_s_at  | TOR1AIP1    | 8.68E-03 | 60.5       | 52.7       | 70.6       | 68.2        | 68.0        | 69.1        | 58.4        | 89.8    | 65.7    | 104.6   | 72.6     | 89.8     | 75.5     | 86.6     | 68.0          | 86.6       | 1.3         |
| 209593_s_at  | TOR1B       | 1.32E-04 | 1322.7     | 1416.4     | 943.5      | 1047.9      | 999.5       | 1065.1      | 960.3       | 1969.3  | 2863.4  | 3083.1  | 2127.7   | 2610.5   | 2674.1   | 3118.7   | 1047.9        | 2674.1     | 2.6         |
| 201684_s_at  | TOX4        | 6.11E-03 | 627.2      | 539.1      | 596.6      | 562.1       | 613.5       | 617.9       | 648.2       | 767.3   | 674.4   | 877.8   | 636.3    | 732.3    | 778.4    | 882.9    | 613.5         | 767.3      | 1.3         |
| 203120_at    | TP53BP2     | 1.04E-04 | 248.7      | 217.7      | 239.5      | 258.5       | 323.9       | 194.5       | 274.1       | 416.5   | 513.6   | 725.4   | 464.4    | 579.5    | 554.8    | 611.6    | 248.7         | 554.8      | 2.2         |
| 224836_at    | TP53INP2    | 9.01E-04 | 1201.4     | 836.7      | 695.8      | 800.5       | 1385.6      | 582.0       | 1035.4      | 1532.5  | 2072.4  | 2906.6  | 2128.1   | 2128.8   | 2092.1   | 2561.7   | 836.7         | 2128.1     | 2.5         |
| 224164_at    | TPM3        | 2.98E-03 | 120.9      | 85.5       | 116.8      | 106.0       | 127.5       | 88.2        | 122.6       | 127.0   | 142.1   | 235.6   | 171.8    | 154.8    | 141.6    | 214.7    | 116.8         | 154.8      | 1.3         |
| 209344_at    | TPM4        | 4.44E-03 | 1243.1     | 917.6      | 830.2      | 1274.3      | 936.5       | 658.8       | 1078.9      | 1339.2  | 1273.6  | 1279.3  | 1620.4   | 1295.6   | 1369.7   | 1655.5   | 936.5         | 1339.2     | 1.4         |
| 210180_s_at  | TRA2B       | 2.68E-03 | 443.9      | 286.2      | 393.5      | 428.4       | 369.7       | 379.6       | 384.9       | 465.7   | 427.6   | 613.6   | 533.4    | 643.8    | 595.7    | 637.6    | 384.9         | 595.7      | 1.5         |
| 1729_at      | TRADD       | 8.67E-05 | 277.3      | 260.8      | 331.8      | 336.2       | 356.6       | 315.4       | 316.0       | 450.5   | 406.7   | 568.8   | 481.9    | 569.7    | 513.1    | 552.1    | 316.0         | 513.1      | 1.6         |
| 205641_s_at  | TRADD       | 5.86E-04 | 315.6      | 321.0      | 343.5      | 335.3       | 390.1       | 299.9       | 336.1       | 446.7   | 454.3   | 529.4   | 429.3    | 524.9    | 506.1    | 542.1    | 335.3         | 506.1      | 1.5         |
| 205599_at    | TRAF1       | 2.42E-06 | 90.6       | 64.2       | 89.6       | 94.5        | 130.5       | 89.9        | 118.3       | 441.7   | 350.8   | 625.0   | 447.2    | 924.3    | 787.5    | 962.5    | 90.6          | 625.0      | 6.9         |
| 235116_at    | TRAF1       | 1.27E-05 | 16.6       | 29.4       | 35.0       | 32.9        | 33.0        | 28.5        | 50.0        | 70.2    | 72.6    | 226.3   | 118.8    | 185.1    | 137.2    | 177.1    | 32.9          | 137.2      | 4.2         |
| 208315_x_at  | TRAF3       | 4.99E-03 | 143.7      | 133.7      | 164.0      | 156.6       | 235.9       | 173.8       | 214.0       | 215.2   | 160.6   | 248.1   | 215.0    | 255.4    | 249.6    | 260.5    | 164.0         | 248.1      | 1.5         |
| 215411_s_at  | TRAF3IP2    | 2.53E-04 | 559.1      | 687.2      | 560.0      | 622.5       | 688.1       | 655.2       | 692.0       | 748.6   | 1058.0  | 1162.4  | 935.3    | 1154.5   | 1159.4   | 1266.9   | 655.2         | 1154.5     | 1.8         |
| 202837_at    | TRAFD1      | 1.62E-03 | 399.0      | 521.1      | 552.0      | 516.9       | 495.0       | 418.5       | 470.9       | 546.6   | 808.2   | 1048.9  | 733.6    | 565.3    | 629.3    | 911.6    | 495.0         | 733.6      | 1.5         |
| 242497_at    | TRAFD1      | 8.04E-03 | 1894.4     | 1710.5     | 1656.1     | 1918.1      | 1436.8      | 1415.0      | 1444.4      | 1929.8  | 2417.5  | 2862.9  | 2040.6   | 2189.3   | 2605.4   | 2821.5   | 1656.1        | 2417.5     | 1.5         |
| 35254_at     | TRAFD1      | 6.14E-04 | 846.2      | 889.8      | 1092.7     | 1114.2      | 896.7       | 935.1       | 1029.3      | 1125.7  | 1604.9  | 2042.2  | 1561.0   | 1210.1   | 1365.4   | 1752.4   | 935.1         | 1561.0     | 1.7         |
| 1555446_s_at | TRAPPC10    | 2.93E-03 | 91.9       | 68.9       | 111.5      | 99.9        | 105.1       | 89.2        | 83.2        | 107.5   | 108.8   | 159.1   | 139.2    | 124.5    | 115.6    | 139.7    | 91.9          | 124.5      | 1.4         |
| 210915_x_at  | TRBC1       | 5.26E-03 | 96.6       | 106.6      | 103.1      | 135.6       | 141.7       | 125.3       | 98.0        | 146.4   | 110.5   | 143.1   | 328.3    | 234.2    | 183.3    | 260.5    | 106.6         | 183.3      | 1.7         |
| 211796_s_at  | TRBC1       | 1.95E-03 | 126.6      | 143.5      | 142.3      | 203.0       | 203.7       | 181.7       | 155.7       | 214.9   | 160.8   | 223.4   | 586.0    | 344.5    | 418.5    | 473.3    | 155.7         | 344.5      | 2.2         |
| 213193_x_at  | TRBC1       | 2.15E-03 | 77.8       | 96.3       | 98.5       | 147.2       | 169.4       | 128.4       | 117.2       | 161.9   | 95.1    | 173.1   | 373.0    | 263.3    | 218.4    | 253.0    | 117.2         | 218.4      | 1.9         |
| 219748_at    | TREML2      | 6.74E-03 | 53.5       | 43.0       | 47.3       | 50.3        | 44.0        | 47.1        | 47.9        | 54.0    | 55.9    | 93.7    | 59.9     | 75.2     | 70.2     | 87.6     | 47.3          | 70.2       | 1.5         |
| 202241_at    | TRIB1       | 5.76E-04 | 293.3      | 253.9      | 260.0      | 295.0       | 397.5       | 357.1       | 423.0       | 440.9   | 511.1   | 773.1   | 481.6    | 642.4    | 605.4    | 672.9    | 295.0         | 605.4      | 2.1         |
| 202478_at    | TRIB2       | 8.67E-05 | 46.4       | 43.6       | 63.4       | 77.5        | 41.6        | 50.4        | 50.1        | 117.2   | 143.9   | 294.6   | 197.1    | 107.6    | 83.2     | 175.9    | 50.1          | 143.9      | 2.9         |
| 202479_s_at  | TRIB2       | 1.16E-05 | 66.8       | 65.5       | 80.7       | 85.2        | 49.1        | 44.6        | 73.4        | 149.0   | 132.6   | 254.2   | 204.8    | 116.8    | 99.3     | 208.6    | 66.8          | 149.0      | 2.2         |
| 204804_at    | TRIM21      | 9.01E-04 | 682.3      | 782.7      | 739.3      | 743.0       | 744.5       | 772.1       | 684.2       | 998.9   | 1039.6  | 1116.9  | 985.0    | 1048.6   | 989.5    | 1177.5   | 743.0         | 1039.6     | 1.4         |
| 213293_s_at  | TRIM22      | 4.50E-03 | 1828.7     | 2103.1     | 2927.3     | 2750.9      | 2344.2      | 2772.9      | 2857.5      | 2506.5  | 3383.8  | 4748.9  | 3855.2   | 2790.8   | 2967.2   | 3853.5   | 2750.9        | 3383.8     | 1.2         |
| 206911_at    | TRIM25      | 1.97E-03 | 164.3      | 135.6      | 157.3      | 163.6       | 180.9       | 152.1       | 201.1       | 190.3   | 204.3   | 262.2   | 193.0    | 257.3    | 233.5    | 328.8    | 163.6         | 233.5      | 1.4         |
| 202702_at    | TRIM26      | 3.11E-03 | 323.1      | 294.0      | 410.7      | 384.0       | 375.9       | 365.0       | 348.3       | 373.8   | 406.8   | 545.6   | 448.1    | 512.7    | 506.6    | 533.0    | 365.0         | 506.6      | 1.4         |
| 210159_s_at  | TRIM31      | 1.23E-03 | 63.4       | 82.5       | 60.2       | 62.1        | 62.3        | 65.6        | 48.6        | 95.7    | 177.9   | 218.1   | 89.2     | 122.5    | 98.0     | 131.8    | 62.3          | 122.5      | 2.0         |
| 215444_s_at  | TRIM31      | 5.83E-03 | 70.2       | 44.3       | 38.1       | 61.5        | 48.2        | 46.7        | 45.2        | 71.7    | 109.4   | 151.1   | 86.1     | 81.2     | 74.0     | 116.9    | 46.7          | 86.1       | 1.8         |
| 224175_s_at  | TRIM34      | 7.20E-03 | 350.1      | 280.5      | 291.7      | 309.3       | 296.8       | 311.5       | 249.2       | 384.7   | 357.9   | 388.4   | 354.3    | 468.6    | 394.0    | 402.0    | 296.8         | 388.4      | 1.3         |
| 219736_at    |             |          |            |            |            |             |             |             |             |         |         |         |          |          |          |          |               |            |             |

TRANSCRIPTION PROFILES IN ALVEOLAR MACROPHAGES

Supplementary Table S1. Continued.

| ID          | Gene Symbol       | p-value  | VW3_Saline | VW6_Saline | VW7_Saline | VW13_Saline | VW22_Saline | VW23_Saline | VW25_Saline | VW3_LPS | VW6_LPS | VW7_LPS | VW13_LPS | VW22_LPS | VW23_LPS | VW25_LPS | Median_saline | Median_LPS | Fold change |
|-------------|-------------------|----------|------------|------------|------------|-------------|-------------|-------------|-------------|---------|---------|---------|----------|----------|----------|----------|---------------|------------|-------------|
| 201546_at   | TRIP12            | 3.55E-03 | 3110.0     | 3401.9     | 2852.3     | 3093.9      | 3464.3      | 3036.1      | 3249.3      | 3720.6  | 4162.4  | 4651.2  | 4146.2   | 4197.0   | 4126.6   | 4404.6   | 3110.0        | 4162.4     | 1.3         |
| 203732_at   | TRIP4             | 2.62E-03 | 608.4      | 498.6      | 691.3      | 749.8       | 727.9       | 673.1       | 693.2       | 754.9   | 917.8   | 1095.4  | 985.0    | 893.9    | 878.0    | 985.2    | 691.3         | 917.8      | 1.3         |
| 210954_s_at | TSC22D2           | 2.29E-03 | 40.4       | 37.0       | 38.9       | 35.3        | 56.2        | 47.8        | 45.4        | 53.9    | 48.7    | 72.3    | 52.9     | 70.3     | 64.4     | 58.1     | 40.4          | 58.1       | 1.4         |
| 215547_at   | TSC22D2           | 1.08E-03 | 146.2      | 158.3      | 187.6      | 193.9       | 250.9       | 198.8       | 249.8       | 316.1   | 230.7   | 385.8   | 287.7    | 338.7    | 304.0    | 335.2    | 193.9         | 316.1      | 1.6         |
| 212656_at   | TSFM              | 2.46E-03 | 230.4      | 198.1      | 196.6      | 275.7       | 272.6       | 253.2       | 268.5       | 311.0   | 243.0   | 344.4   | 372.3    | 375.4    | 326.6    | 341.3    | 253.2         | 341.3      | 1.3         |
| 223392_s_at | TSHZ3             | 4.45E-03 | 118.6      | 89.9       | 148.8      | 140.7       | 140.9       | 81.7        | 125.9       | 152.4   | 101.0   | 288.2   | 179.4    | 190.1    | 157.5    | 187.7    | 125.9         | 179.4      | 1.4         |
| 221002_s_at | SPAN14            | 5.00E-03 | 1651.5     | 1515.6     | 1752.5     | 1768.0      | 1906.9      | 1795.4      | 1973.9      | 2009.7  | 2144.2  | 2706.0  | 1871.4   | 2582.0   | 2491.9   | 2536.5   | 1768.0        | 2491.9     | 1.4         |
| 225775_at   | SPAN33            | 2.00E-03 | 139.2      | 139.6      | 96.4       | 179.7       | 290.7       | 96.5        | 121.0       | 227.0   | 266.5   | 340.5   | 266.5    | 426.5    | 185.1    | 491.7    | 139.2         | 266.5      | 1.9         |
| 218272_at   | TTC38             | 4.51E-03 | 345.2      | 298.0      | 344.9      | 291.3       | 271.7       | 408.9       | 284.9       | 403.8   | 348.7   | 466.0   | 346.5    | 426.5    | 622.0    | 482.6    | 298.0         | 426.5      | 1.4         |
| 204141_at   | TUBB2A            | 8.22E-03 | 3148.6     | 2940.9     | 1518.8     | 2103.0      | 2180.7      | 2638.3      | 2963.4      | 3364.6  | 4556.8  | 3972.5  | 3563.7   | 2599.5   | 3970.2   | 4081.5   | 2638.3        | 3970.2     | 1.5         |
| 209372_x_at | TUBB2A /// TUBB2B | 3.21E-03 | 363.0      | 261.6      | 185.2      | 220.1       | 215.7       | 234.0       | 306.8       | 345.3   | 439.5   | 357.5   | 357.5    | 356.8    | 596.9    | 515.8    | 234.0         | 357.5      | 1.5         |
| 213476_x_at | TUBB3             | 9.28E-03 | 688.6      | 456.4      | 445.2      | 571.3       | 466.0       | 431.0       | 626.5       | 691.2   | 673.6   | 822.8   | 670.0    | 790.0    | 1049.2   | 844.2    | 466.0         | 790.0      | 1.7         |
| 218965_s_at | TUT1              | 3.13E-03 | 449.9      | 229.9      | 362.8      | 384.0       | 457.6       | 286.1       | 503.6       | 534.5   | 467.7   | 699.7   | 525.0    | 769.8    | 941.0    | 757.2    | 384.0         | 699.7      | 1.8         |
| 214007_s_at | TWF1              | 2.61E-03 | 210.0      | 211.5      | 247.3      | 241.6       | 277.9       | 220.8       | 254.7       | 341.5   | 272.6   | 392.5   | 412.7    | 332.5    | 305.9    | 301.4    | 241.6         | 332.5      | 1.4         |
| 204858_s_at | TYMP              | 8.19E-03 | 67.0       | 62.4       | 84.0       | 85.5        | 73.7        | 86.7        | 90.3        | 90.3    | 71.8    | 119.8   | 95.1     | 119.5    | 194.9    | 122.8    | 84.0          | 119.5      | 1.4         |
| 217497_at   | TYMP              | 6.81E-04 | 417.2      | 361.8      | 370.4      | 372.7       | 327.3       | 303.5       | 347.5       | 534.9   | 503.7   | 683.6   | 516.1    | 567.9    | 622.7    | 653.1    | 361.8         | 567.9      | 1.6         |
| 209340_at   | UAP1              | 4.87E-03 | 414.9      | 388.7      | 505.7      | 564.5       | 637.1       | 486.7       | 647.9       | 584.8   | 790.8   | 1221.8  | 809.8    | 667.9    | 909.2    | 844.9    | 505.7         | 809.8      | 1.6         |
| 222600_s_at | UBA6              | 2.97E-04 | 141.7      | 165.0      | 230.3      | 212.3       | 238.0       | 234.2       | 306.2       | 268.2   | 247.6   | 448.9   | 376.1    | 316.0    | 353.2    | 471.6    | 230.3         | 353.2      | 1.4         |
| 222601_at   | UBA6              | 9.61E-03 | 816.4      | 845.0      | 947.3      | 896.8       | 1022.1      | 1030.4      | 1346.3      | 1022.0  | 1338.2  | 1733.2  | 1484.7   | 1175.8   | 1120.6   | 1601.7   | 947.3         | 1338.2     | 1.5         |
| 1294_at     | UBA7              | 6.73E-03 | 1062.6     | 1058.7     | 955.5      | 1105.1      | 831.5       | 874.8       | 835.1       | 1110.5  | 1461.3  | 1380.2  | 1215.9   | 1561.6   | 1484.0   | 1496.1   | 955.5         | 1461.3     | 1.5         |
| 203281_s_at | UBA7              | 7.33E-03 | 713.8      | 695.4      | 669.7      | 645.6       | 505.7       | 571.1       | 539.4       | 733.3   | 861.3   | 930.8   | 807.6    | 1047.8   | 976.0    | 927.5    | 645.6         | 927.5      | 1.4         |
| 201898_s_at | UBE2A             | 1.99E-03 | 782.0      | 763.1      | 676.8      | 782.6       | 762.9       | 702.8       | 836.6       | 1074.3  | 897.3   | 1154.1  | 993.5    | 1161.1   | 978.6    | 1119.4   | 763.1         | 1074.3     | 1.4         |
| 212519_at   | UBE2E1            | 4.50E-03 | 385.5      | 416.8      | 792.4      | 630.5       | 716.4       | 720.9       | 843.3       | 687.2   | 825.9   | 1339.9  | 892.5    | 853.5    | 842.1    | 1026.7   | 716.4         | 853.5      | 1.2         |
| 238958_at   | UBE2E1            | 2.38E-03 | 85.9       | 134.0      | 158.4      | 136.6       | 126.8       | 126.6       | 167.2       | 193.6   | 195.0   | 268.5   | 207.5    | 146.8    | 215.8    | 211.8    | 134.0         | 207.5      | 1.5         |
| 201649_at   | UBE2L6            | 6.68E-04 | 4132.5     | 4834.0     | 4502.2     | 4309.3      | 4076.9      | 4069.3      | 4086.4      | 5613.4  | 6206.7  | 6663.7  | 5728.8   | 5631.1   | 6184.7   | 6179.7   | 4132.5        | 6179.7     | 1.5         |
| 201523_x_at | UBE2N             | 3.09E-04 | 451.8      | 393.1      | 423.1      | 494.3       | 509.6       | 381.0       | 504.6       | 716.8   | 646.9   | 810.4   | 717.2    | 666.8    | 676.3    | 760.4    | 451.8         | 716.8      | 1.6         |
| 202779_s_at | UBE2S             | 1.61E-03 | 55.7       | 40.5       | 79.5       | 71.4        | 50.7        | 50.4        | 74.6        | 73.0    | 72.7    | 147.9   | 95.3     | 155.3    | 157.1    | 146.7    | 55.7          | 146.7      | 2.6         |
| 217750_s_at | UBE2Z             | 3.41E-05 | 1290.4     | 1100.8     | 1203.6     | 1065.1      | 1360.7      | 1012.0      | 1310.7      | 2047.9  | 1902.5  | 2493.4  | 2144.9   | 2619.8   | 2197.0   | 2346.4   | 1203.6        | 2197.0     | 1.8         |
| 222395_s_at | UBE2Z             | 1.84E-04 | 353.6      | 291.9      | 368.7      | 315.5       | 326.5       | 312.4       | 388.7       | 479.4   | 518.7   | 791.9   | 529.4    | 509.6    | 601.3    | 650.5    | 326.5         | 529.4      | 1.6         |
| 236107_at   | UBE2Z             | 6.89E-04 | 167.1      | 159.8      | 161.6      | 161.6       | 180.5       | 186.2       | 181.9       | 231.7   | 220.2   | 328.9   | 271.5    | 238.5    | 280.0    | 313.4    | 167.1         | 271.5      | 1.6         |
| 211285_s_at | UBE3A             | 5.80E-03 | 577.6      | 601.7      | 767.7      | 702.7       | 836.7       | 841.3       | 937.5       | 746.3   | 935.3   | 1436.8  | 974.8    | 944.1    | 967.0    | 1277.2   | 767.7         | 967.0      | 1.3         |
| 205687_at   | UBFD1             | 5.29E-03 | 76.4       | 78.0       | 124.6      | 110.4       | 120.5       | 113.4       | 95.0        | 138.5   | 109.5   | 187.0   | 149.7    | 130.4    | 130.2    | 138.2    | 110.4         | 138.2      | 1.3         |
| 218082_s_at | UBP1              | 6.05E-03 | 964.8      | 1237.9     | 1495.1     | 1384.8      | 1430.4      | 1388.1      | 1653.0      | 1249.1  | 2061.7  | 2521.0  | 2063.7   | 1544.1   | 1672.7   | 2044.8   | 1388.1        | 2044.8     | 1.5         |
| 211950_at   | UBR4              | 2.02E-03 | 475.9      | 448.4      | 441.0      | 556.3       | 644.2       | 472.9       | 528.6       | 643.7   | 578.8   | 753.4   | 708.7    | 806.3    | 903.4    | 938.8    | 475.9         | 753.4      | 1.6         |
| 224834_at   | UBTD2             | 5.33E-03 | 145.7      | 86.8       | 165.3      | 210.2       | 212.3       | 134.0       | 282.9       | 275.0   | 210.2   | 561.4   | 295.1    | 278.9    | 299.4    | 308.7    | 165.3         | 295.1      | 1.8         |
| 235327_x_at | UBXN2A            | 5.06E-03 | 511.0      | 426.2      | 471.7      | 462.6       | 490.9       | 520.3       | 546.2       | 624.7   | 601.4   | 777.6   | 645.0    | 678.1    | 531.3    | 880.5    | 490.9         | 645.0      | 1.3         |
| 212007_at   | UBXN4             | 3.93E-03 | 685.4      | 655.5      | 724.1      | 700.4       | 690.2       | 608.6       | 674.1       | 904.6   | 781.0   | 952.2   | 888.9    | 861.7    | 831.9    | 798.1    | 685.4         | 861.7      | 1.3         |
| 204881_s_at | UGCG              | 2.69E-03 | 1997.4     | 652.9      | 1442.1     | 1347.2      | 2299.0      | 911.4       | 2993.1      | 2755.6  | 3510.6  | 5472.0  | 3320.9   | 3469.9   | 3780.7   | 4515.3   | 1442.1        | 3510.6     | 2.4         |
| 221765_at   | UGCG              | 1.21E-03 | 395.2      | 160.9      | 475.0      | 375.1       | 715.6       | 270.0       | 1136.9      | 832.2   | 1060.5  | 2365.5  | 1111.0   | 1138.5   | 1330.5   | 1804.3   | 395.2         | 1138.5     | 2.9         |
| 224967_at   | UGCG              | 4.13E-03 | 3536.1     | 2056.1     | 3965.4     | 3011.0      | 5483.2      | 2543.0      | 6594.0      | 5246.5  | 6576.6  | 9673.1  | 6822.5   | 6136.0   | 6112.3   | 7863.5   | 3536.1        | 6576.6     | 1.9         |
| 225869_s_at | UNC93B1           | 5.39E-04 | 133.1      | 127.4      | 172.5      | 134.3       | 124.1       | 122.5       | 136.4       | 194.4   | 161.7   | 239.1   | 194.6    | 206.5    | 220.8    | 215.5    | 133.1         | 206.5      | 1.6         |
| 1558569_at  | UNQ6228           | 7.61E-05 | 108.9      | 65.2       | 105.9      | 119.6       | 110.2       | 104.5       | 95.3        | 166.5   | 154.5   | 308.1   | 296.3    | 212.2    | 214.0    | 189.3    | 105.9         | 212.2      | 2.0         |
| 220507_s_at | UPB1              | 1.90E-03 | 50.2       | 32.3       | 43.4       | 44.8        | 36.1        | 43.9        | 40.6        | 68.5    | 60.6    | 110.1   | 59.9     | 97.0     | 57.0     | 77.7     | 43.4          | 68.5       | 1.6         |
| 201831_s_at | USO1              | 5.12E-03 | 891.2      | 849.2      | 845.3      | 843.5       | 986.1       | 908.2       | 988.8       | 1027.2  | 1144.6  | 1440.2  | 1162.0   | 1115.2   | 1262.1   | 1280.6   | 891.2         | 1162.0     | 1.3         |
| 201832_s_at | USO1              | 7.21E-03 | 1729.0     | 1827.7     | 1572.3     | 1581.0      | 1872.8      | 1655.9      | 1950.4      | 2344.9  | 2081.2  | 2395.6  | 2172.1   | 2159.2   | 2140.3   | 2254.4   | 1729.0        | 2172.1     | 1.3         |
| 215886_x_at | USP12             | 2.59E-03 | 174.8      | 139.2      | 185.2      | 165.1       | 224.1       | 153.4       | 192.0       | 245.9   | 228.5   | 591.2   | 236.8    | 300.2    | 288.0    | 312.3    | 174.8         | 288.0      | 1.6         |
| 205356_at   | USP13             | 2.00E-03 | 154.9      | 100.0      | 176.8      | 191.2       | 291.3       | 160.5       | 283.1       | 262.6   | 193.4   | 333.2   | 308.1    | 318.9    | 336.3    | 353.1    | 176.8         | 318.9      | 1.8         |
| 227788_at   | USP13             | 9.07E-03 | 191.3      | 113.5      | 215.2      | 168.0       | 341.1       | 185.6       | 338.4       | 359.7   | 153.0   | 347.3   | 350.5    | 342.3    | 343.2    | 362.2    | 191.3         | 347.3      | 1.8         |
| 201672_s_at | USP14             | 9.78E-03 | 554.0      | 510.9      | 584.1      | 555.2       | 617.0       | 598.7       | 567.6       | 763.7   | 624.2   | 856.4   | 753.0    | 647.5    | 692.0    | 708.6    | 567.6         | 708.6      | 1.2         |
| 210681_s_at | USP15             | 1.06E-03 | 723.8      | 814.3      | 813.0      | 861.6       | 867.3       | 742.9       | 695.2       | 906.9   | 1329.2  | 1678.4  | 1253.9   | 1151.6   | 1097.8   | 1254.0   | 813.0         | 1253.9     | 1.5         |
| 231990_at   | USP15             | 7.14E-03 | 114.3      | 130.5      | 173.9      | 182.8       | 179.0       | 191.0       | 181.4       | 169.2   | 193.2   | 395.2   | 302.9    | 209.8    | 191.4    | 307.3    | 179.0         | 209.8      | 1.2         |
| 219211_at   | USP18             | 6.17E-06 | 356.9      | 284.9      | 268.6      | 187.1       | 181.7       | 176.5       | 215.1       | 1292.8  | 2207.3  | 3327.4  | 1514.9   | 1749.8   | 1650.1   | 2356.6   | 215.1         | 1749.8     | 8.1         |
| 226172_at   | USP42             | 1.91E-03 | 77.0       | 68.5       | 78.9       | 101.2       | 116.8       | 86.7        | 105.6       | 136.5   | 112.1   | 208.6   | 132.9    | 164.5    | 123.4    | 152.2    | 68.5          | 136.5      | 1.6         |
| 238164_at   | USP6NL            | 2.64E-03 | 61.0       | 55.5       | 179.5      | 95.4        | 147.2       | 174.1       | 184.4       | 137.6   | 111.3   | 495.2   | 219.8    | 190.0    | 239.9    | 218.2    | 147.2         | 218.2      | 1.5         |
| 219675_s_at | UXS1              | 5.51E-05 | 492.3      | 558.9      | 513.5      | 548.1       | 601.3       | 453.0       | 572.8       | 883.7   | 994.8   | 1289.3  | 1061.9   | 961.3    | 851.3    | 1204.5   | 548.1         | 994.8      | 1.8         |
| 225583_at   | UXS1              | 4.38E-04 | 1318.5     | 1316.3     | 1330.5     | 1339.9      | 1494.4      | 1309.2      | 1631.3      | 2057.1  | 2391.4  | 3580.5  | 2463.8   | 1996.8   | 2294.4   | 2833.8   | 1330.5        | 2391.4     | 1.8         |
| 216407_at   | VAC14             | 7.35E-03 | 151.5      | 93.6       | 147.1      | 165.8       | 143.7       | 102.2       | 150.7       | 180.7   | 130.8   | 199.5   | 166.9    | 200.6    | 166.8    | 203.6    | 147.1         | 180.7      | 1.2         |
| 218169_at   | VAC14             | 4.52E-03 | 235.6      | 128.7      | 241.7      | 256.5       | 230.0       | 162.2       | 2           |         |         |         |          |          |          |          |               |            |             |

Supplementary Table S1. Continued.

| ID           | Gene Symbol | p-value  | VW3_Saline | VW6_Saline | VW7_Saline | VW13_Saline | VW22_Saline | VW23_Saline | VW25_Saline | VW3_LPS | VW6_LPS | VW7_LPS | VW13_LPS | VW22_LPS | VW23_LPS | VW25_LPS | Median_saline | Median_LPS | Fold change |
|--------------|-------------|----------|------------|------------|------------|-------------|-------------|-------------|-------------|---------|---------|---------|----------|----------|----------|----------|---------------|------------|-------------|
| 221731_x_at  | VCAN        | 4.14E-04 | 264.3      | 157.7      | 279.5      | 407.4       | 426.6       | 161.6       | 366.0       | 492.6   | 386.0   | 584.0   | 493.2    | 1200.8   | 429.3    | 1183.0   | 279.5         | 493.2      | 1.8         |
| 210512_s_at  | VEGFA       | 3.28E-04 | 44.0       | 83.8       | 59.5       | 56.2        | 127.5       | 124.2       | 142.9       | 197.3   | 152.2   | 187.7   | 175.1    | 300.0    | 186.5    | 325.3    | 83.8          | 187.7      | 2.2         |
| 210513_s_at  | VEGFA       | 9.58E-04 | 105.6      | 117.2      | 92.1       | 81.8        | 135.2       | 111.6       | 126.1       | 187.5   | 159.1   | 134.3   | 137.7    | 415.2    | 233.7    | 340.1    | 111.6         | 187.5      | 1.7         |
| 211527_x_at  | VEGFA       | 1.18E-04 | 142.1      | 194.0      | 108.1      | 114.0       | 229.4       | 231.5       | 198.9       | 420.5   | 318.7   | 246.0   | 385.4    | 721.4    | 397.8    | 594.1    | 194.0         | 397.8      | 2.1         |
| 212171_x_at  | VEGFA       | 1.80E-03 | 113.3      | 166.0      | 102.7      | 95.6        | 154.6       | 166.7       | 166.0       | 258.1   | 191.8   | 172.4   | 179.5    | 487.4    | 235.4    | 363.2    | 154.6         | 235.4      | 1.5         |
| 209950_s_at  | VILL        | 7.82E-03 | 80.6       | 50.0       | 79.8       | 78.1        | 92.1        | 59.2        | 99.3        | 106.0   | 77.1    | 145.9   | 104.3    | 142.4    | 143.8    | 97.1     | 79.8          | 106.0      | 1.3         |
| 1558549_s_at | VNN1        | 8.00E-03 | 84.9       | 104.1      | 188.7      | 79.1        | 97.2        | 82.5        | 78.9        | 122.3   | 146.3   | 231.8   | 152.7    | 123.0    | 109.5    | 83.5     | 84.9          | 123.0      | 1.4         |
| 205922_at    | VNN2        | 6.86E-03 | 563.8      | 471.5      | 747.1      | 583.3       | 596.6       | 586.1       | 433.5       | 713.4   | 663.3   | 899.8   | 708.7    | 681.1    | 747.1    | 735.5    | 583.3         | 713.4      | 1.2         |
| 220528_at    | VNN3        | 3.33E-05 | 31.1       | 41.4       | 47.1       | 31.0        | 43.4        | 32.2        | 33.4        | 73.2    | 86.2    | 144.9   | 105.7    | 133.1    | 112.7    | 174.3    | 33.4          | 112.7      | 3.4         |
| 200628_s_at  | WARS        | 3.88E-05 | 1426.1     | 1183.4     | 1304.3     | 1226.6      | 1290.0      | 850.3       | 1556.6      | 2406.7  | 2737.4  | 3671.3  | 2554.9   | 3362.3   | 2795.9   | 3630.1   | 1290.0        | 2795.9     | 2.2         |
| 200629_at    | WARS        | 2.75E-05 | 2645.0     | 2313.5     | 2104.2     | 1970.6      | 2374.1      | 1709.7      | 2537.9      | 4251.6  | 4082.4  | 4726.4  | 3906.0   | 4650.5   | 3669.0   | 5218.4   | 2313.5        | 4251.6     | 1.8         |
| 233559_s_at  | WDFY1       | 3.59E-03 | 929.6      | 953.8      | 1001.8     | 1134.1      | 1268.4      | 1110.5      | 1096.4      | 1374.2  | 1497.4  | 1599.0  | 1343.9   | 1396.3   | 1441.5   | 1571.8   | 1096.4        | 1441.5     | 1.3         |
| 201294_s_at  | WSB1        | 4.07E-05 | 1730.0     | 2153.3     | 2046.4     | 1362.7      | 1522.2      | 1373.5      | 1655.1      | 2682.4  | 3835.4  | 4514.9  | 2821.5   | 2885.1   | 2455.8   | 3520.7   | 1655.1        | 2885.1     | 1.7         |
| 201295_s_at  | WSB1        | 1.63E-03 | 185.0      | 286.8      | 435.2      | 326.3       | 342.5       | 392.0       | 462.1       | 328.2   | 678.8   | 1155.3  | 722.1    | 520.5    | 432.3    | 728.0    | 342.5         | 678.8      | 2.0         |
| 201296_s_at  | WSB1        | 1.36E-03 | 2612.4     | 2881.0     | 3536.3     | 3402.4      | 3626.8      | 3533.8      | 3713.1      | 3504.3  | 5049.1  | 6545.8  | 4727.3   | 4556.5   | 4741.7   | 5327.2   | 3533.8        | 4741.7     | 1.3         |
| 210561_s_at  | WSB1        | 3.81E-04 | 1445.4     | 1749.7     | 1947.2     | 1633.0      | 1944.7      | 1922.4      | 2074.0      | 2367.7  | 3090.3  | 4274.9  | 2818.0   | 2641.2   | 2729.0   | 3203.8   | 1922.4        | 2818.0     | 1.5         |
| 213406_at    | WSB1        | 8.77E-05 | 1015.1     | 986.9      | 1135.3     | 1020.9      | 1128.9      | 948.1       | 1087.8      | 1490.6  | 1888.9  | 2619.8  | 1698.1   | 1994.5   | 1693.6   | 2019.1   | 1020.9        | 1888.9     | 1.9         |
| 1560274_at   | WTAP        | 1.89E-04 | 29.1       | 17.5       | 29.7       | 27.2        | 34.5        | 25.1        | 36.9        | 53.3    | 41.6    | 113.3   | 73.6     | 78.4     | 51.2     | 57.9     | 29.1          | 57.9       | 2.0         |
| 203137_at    | WTAP        | 2.66E-05 | 596.3      | 526.3      | 694.3      | 624.3       | 999.7       | 643.2       | 829.6       | 1373.2  | 1336.9  | 2126.2  | 1523.9   | 1629.7   | 1534.6   | 1953.4   | 643.2         | 1534.6     | 2.4         |
| 210285_x_at  | WTAP        | 2.00E-05 | 611.8      | 514.4      | 529.8      | 563.8       | 786.2       | 544.8       | 669.0       | 1162.3  | 1214.6  | 1717.2  | 1220.5   | 1734.3   | 1567.9   | 1766.3   | 563.8         | 1567.9     | 2.8         |
| 214759_at    | WTAP        | 2.53E-05 | 68.9       | 63.9       | 96.2       | 81.4        | 117.9       | 86.2        | 119.3       | 156.3   | 117.0   | 293.3   | 187.3    | 298.2    | 211.4    | 224.3    | 86.2          | 211.4      | 2.5         |
| 229630_s_at  | WTAP        | 1.78E-03 | 3776.3     | 3983.6     | 5134.9     | 4809.2      | 5552.4      | 4697.1      | 5584.5      | 4879.0  | 7555.3  | 9507.9  | 7121.8   | 6311.0   | 7055.1   | 8517.9   | 4809.2        | 7121.8     | 1.5         |
| 241626_at    | WTAP        | 6.07E-05 | 79.1       | 76.2       | 95.6       | 86.7        | 90.6        | 65.8        | 85.1        | 132.4   | 115.6   | 213.0   | 161.6    | 169.3    | 119.5    | 149.5    | 85.1          | 149.5      | 1.8         |
| 206133_at    | XAF1        | 2.16E-04 | 1217.9     | 1812.7     | 1467.7     | 1104.2      | 826.2       | 737.5       | 777.7       | 2035.2  | 2553.5  | 3585.6  | 2419.6   | 2124.3   | 2045.6   | 2470.9   | 1104.2        | 2419.6     | 2.2         |
| 228617_at    | XAF1        | 2.95E-04 | 1009.3     | 1222.0     | 1105.8     | 951.5       | 666.8       | 550.3       | 618.6       | 1402.4  | 2124.1  | 3142.3  | 1975.9   | 1506.7   | 1534.5   | 2133.3   | 951.5         | 1975.9     | 2.1         |
| 242234_at    | XAF1        | 1.24E-04 | 50.5       | 74.2       | 92.5       | 52.5        | 45.6        | 50.8        | 61.3        | 101.9   | 102.7   | 265.7   | 149.4    | 115.5    | 118.8    | 125.6    | 52.5          | 118.8      | 2.3         |
| 200670_at    | XBP1        | 1.18E-03 | 180.1      | 126.1      | 136.3      | 119.6       | 209.9       | 151.3       | 235.4       | 253.6   | 224.3   | 355.8   | 282.7    | 311.0    | 257.9    | 308.8    | 151.3         | 282.7      | 1.9         |
| 206366_x_at  | XCL1        | 6.46E-03 | 57.5       | 65.9       | 49.8       | 60.8        | 60.5        | 76.5        | 52.6        | 69.0    | 69.2    | 67.0    | 89.0     | 99.6     | 94.0     | 80.0     | 60.5          | 80.0       | 1.3         |
| 208453_s_at  | XPNP1       | 3.99E-03 | 584.8      | 489.9      | 548.0      | 626.1       | 578.4       | 450.4       | 577.1       | 664.2   | 688.5   | 850.4   | 734.9    | 808.0    | 627.4    | 718.0    | 577.1         | 718.0      | 1.2         |
| 211982_x_at  | XPO6        | 2.76E-03 | 486.7      | 467.3      | 528.6      | 531.6       | 478.8       | 417.2       | 549.6       | 625.7   | 559.9   | 714.6   | 680.6    | 790.7    | 830.2    | 855.8    | 486.7         | 714.6      | 1.5         |
| 214784_x_at  | XPO6        | 1.78E-03 | 172.7      | 188.3      | 264.6      | 229.6       | 245.9       | 220.3       | 291.5       | 260.3   | 230.8   | 418.1   | 363.7    | 291.6    | 370.0    | 379.4    | 229.6         | 363.7      | 1.6         |
| 1555785_a_at | XRN1        | 2.52E-05 | 145.6      | 157.5      | 220.0      | 241.0       | 255.2       | 196.8       | 300.5       | 405.5   | 549.8   | 1073.8  | 623.8    | 542.1    | 542.1    | 863.6    | 220.0         | 549.8      | 2.5         |
| 1570394_at   | XRN1        | 1.37E-04 | 70.7       | 86.9       | 104.9      | 77.2        | 93.9        | 94.6        | 111.4       | 152.2   | 218.7   | 525.7   | 268.7    | 199.0    | 181.0    | 296.4    | 93.9          | 218.7      | 2.3         |
| 225814_at    | XRN1        | 2.13E-04 | 1050.6     | 1041.5     | 1326.2     | 1224.9      | 1368.3      | 1416.1      | 1418.9      | 1807.8  | 2706.8  | 4123.4  | 2824.4   | 2099.0   | 2377.2   | 3385.5   | 1326.2        | 2706.8     | 2.0         |
| 233632_s_at  | XRN1        | 1.65E-04 | 151.1      | 191.0      | 237.0      | 245.3       | 258.7       | 292.7       | 306.7       | 340.8   | 472.0   | 890.0   | 554.2    | 424.0    | 498.1    | 682.9    | 245.3         | 498.1      | 2.0         |
| 213725_x_at  | XYLT1       | 2.75E-03 | 32.5       | 46.5       | 38.1       | 28.9        | 52.6        | 33.7        | 56.8        | 63.4    | 61.5    | 122.8   | 63.5     | 71.0     | 59.9     | 74.9     | 38.1          | 63.5       | 1.7         |
| 1557047_at   | YEATS2      | 4.54E-03 | 77.8       | 87.5       | 58.5       | 63.5        | 49.4        | 48.9        | 67.8        | 78.2    | 116.5   | 87.4    | 91.0     | 77.8     | 65.1     | 93.1     | 63.5          | 87.4       | 1.4         |
| 221203_s_at  | YEATS2      | 4.37E-03 | 298.8      | 299.3      | 342.4      | 316.0       | 319.7       | 336.6       | 311.7       | 382.3   | 387.4   | 582.4   | 433.5    | 371.3    | 398.2    | 507.2    | 316.0         | 398.2      | 1.3         |
| 217785_s_at  | YKT6        | 8.59E-04 | 194.0      | 150.2      | 192.1      | 199.6       | 198.5       | 178.6       | 225.8       | 287.8   | 203.4   | 372.4   | 266.5    | 300.1    | 295.5    | 297.4    | 194.0         | 295.5      | 1.5         |
| 218647_s_at  | YRDC        | 8.67E-04 | 161.3      | 167.0      | 250.9      | 240.3       | 266.6       | 231.7       | 359.0       | 278.2   | 332.8   | 513.1   | 404.4    | 366.4    | 319.6    | 454.8    | 240.3         | 366.4      | 1.5         |
| 222703_s_at  | YRDC        | 1.49E-04 | 241.0      | 182.3      | 241.1      | 276.6       | 242.5       | 226.3       | 268.0       | 337.2   | 305.6   | 483.8   | 421.6    | 429.7    | 481.7    | 508.8    | 241.1         | 429.7      | 1.8         |
| 1554821_a_at | ZBED1       | 1.10E-03 | 304.1      | 311.1      | 350.0      | 332.8       | 388.1       | 317.9       | 347.9       | 335.5   | 507.7   | 682.5   | 466.6    | 616.1    | 560.9    | 624.5    | 332.8         | 560.9      | 1.7         |
| 203043_at    | ZBED1       | 1.35E-03 | 109.0      | 90.0       | 111.6      | 112.1       | 137.0       | 114.3       | 139.3       | 127.8   | 147.6   | 200.8   | 149.9    | 210.7    | 169.6    | 187.0    | 112.1         | 169.6      | 1.5         |
| 208087_s_at  | ZBP1        | 4.69E-05 | 78.1       | 94.1       | 101.4      | 70.4        | 93.6        | 95.5        | 67.7        | 190.2   | 207.6   | 472.9   | 238.5    | 224.1    | 236.2    | 289.9    | 93.6          | 236.2      | 2.5         |
| 242020_s_at  | ZBP1        | 4.31E-05 | 142.7      | 163.0      | 121.4      | 82.6        | 87.9        | 135.7       | 87.8        | 336.8   | 434.0   | 577.6   | 282.0    | 464.5    | 362.4    | 501.6    | 121.4         | 434.0      | 3.6         |
| 1554036_at   | ZBTB24      | 4.59E-03 | 90.2       | 90.1       | 131.9      | 103.3       | 127.4       | 95.2        | 184.6       | 161.9   | 148.5   | 363.5   | 150.0    | 135.2    | 141.7    | 264.1    | 103.3         | 150.0      | 1.5         |
| 229691_at    | ZBTB42      | 1.16E-03 | 144.5      | 131.7      | 190.5      | 173.2       | 186.2       | 175.4       | 159.4       | 247.7   | 192.0   | 268.3   | 193.2    | 290.3    | 260.7    | 269.6    | 173.2         | 260.7      | 1.5         |
| 204180_s_at  | ZBTB43      | 3.48E-04 | 133.3      | 130.7      | 169.3      | 149.0       | 204.3       | 155.5       | 185.4       | 200.4   | 215.9   | 350.6   | 251.5    | 265.5    | 249.7    | 283.5    | 155.5         | 251.5      | 1.6         |
| 204181_s_at  | ZBTB43      | 6.81E-03 | 184.8      | 142.4      | 176.4      | 162.1       | 187.5       | 167.0       | 214.9       | 190.5   | 257.5   | 336.8   | 204.9    | 228.3    | 242.0    | 319.5    | 176.4         | 242.0      | 1.4         |
| 204182_s_at  | ZBTB43      | 1.15E-03 | 60.6       | 53.8       | 99.6       | 84.3        | 99.6        | 98.3        | 122.2       | 119.3   | 124.7   | 185.5   | 116.8    | 136.8    | 129.9    | 183.1    | 98.3          | 129.9      | 1.3         |
| 218810_at    | ZC3H12A     | 2.44E-05 | 52.7       | 34.1       | 76.5       | 62.3        | 104.5       | 46.2        | 119.3       | 147.3   | 206.9   | 451.5   | 312.0    | 425.5    | 446.4    | 408.2    | 62.3          | 408.2      | 6.5         |
| 231899_at    | ZC3H12C     | 3.79E-04 | 31.4       | 10.8       | 31.2       | 24.9        | 80.1        | 20.6        | 99.2        | 96.4    | 44.1    | 318.9   | 134.7    | 156.5    | 113.5    | 206.5    | 31.2          | 134.7      | 4.3         |
| 213323_s_at  | ZC3H7B      | 9.11E-04 | 44.8       | 39.2       | 52.5       | 48.6        | 53.2        | 48.1        | 54.8        | 71.0    | 59.2    | 76.2    | 76.9     | 78.0     | 60.3     | 67.1     | 48.6          | 71.0       | 1.5         |
| 213051_at    | ZC3HAV1     | 3.93E-03 | 638.5      | 747.7      | 701.9      | 629.3       | 539.0       | 547.0       | 692.2       | 704.3   | 899.7   | 1081.0  | 926.9    | 704.1    | 710.2    | 1002.9   | 638.5         | 899.7      | 1.4         |
| 220104_at    | ZC3HAV1     | 6.18E-04 | 274.4      | 268.4      | 326.4      | 292.9       | 281.3       | 278.7       | 316.1       | 388.3   | 734.6   | 1123.5  | 576.8    | 461.8    | 464.6    | 801.0    | 281.3         | 576.8      | 2.1         |
| 225634_at    | ZC3HAV1     | 8.31E-03 | 293.2      | 325.7      | 350.5      | 283.7       | 303.8       | 314.6       | 349.9       | 377.0   | 341.1   | 593.9   | 417.2    | 427.3    | 344.2    | 527.4    | 314.6         | 417.2      | 1.3         |
| 1559399_s_at | ZCCHC10     | 1.46E-04 | 292.5      | 174.7      | 270.4      | 255.4       | 330.5       | 237.6       | 358.9       | 415.6   | 349.8   | 545.0   | 384.5    | 571.5    | 522.6    | 653.7    | 270.4         | 522.6      | 1.9         |
| 224503_s_at  | ZCCHC2      | 1.16E-03 | 166.5      | 153.8      | 159.6      | 112.7       | 164.7       | 134.5       | 115.1       | 222.3   | 242.0   | 266.7   | 176.8    | 192.8    | 183.6    | 165.5    | 153.8         | 192.8      | 1.3         |
| 219296_at    | ZDHHC13     | 8.55E-04 | 179.0      | 195.9      | 223.7      | 222.7       |             |             |             |         |         |         |          |          |          |          |               |            |             |

TRANSCRIPTION PROFILES IN ALVEOLAR MACROPHAGES

Supplementary Table S1. Continued.

| ID           | Gene Symbol | p-value  | VW3_Saline | VW6_Saline | VW7_Saline | VW13_Saline | VW22_Saline | VW23_Saline | VW25_Saline | VW3_LPS | VW6_LPS | VW7_LPS | VW13_LPS | VW22_LPS | VW23_LPS | VW25_LPS | Median_saline | Median_LPS | Fold change |
|--------------|-------------|----------|------------|------------|------------|-------------|-------------|-------------|-------------|---------|---------|---------|----------|----------|----------|----------|---------------|------------|-------------|
| 201531_at    | ZFP36       | 1.80E-03 | 1316.2     | 1136.3     | 1411.2     | 1350.6      | 1484.8      | 1293.8      | 1354.3      | 1736.8  | 2543.7  | 3258.5  | 1562.6   | 2777.1   | 1880.5   | 2920.9   | 1350.6        | 2543.7     | 1.9         |
| 211962_s_at  | ZFP36L1     | 4.71E-03 | 452.4      | 561.9      | 634.8      | 631.6       | 820.6       | 501.4       | 580.8       | 593.8   | 770.7   | 1179.5  | 1023.2   | 805.6    | 737.6    | 949.8    | 580.8         | 805.6      | 1.4         |
| 211965_at    | ZFP36L1     | 1.72E-03 | 165.0      | 168.3      | 223.2      | 184.8       | 256.2       | 160.7       | 186.9       | 212.0   | 287.0   | 342.6   | 284.1    | 309.2    | 227.4    | 395.6    | 184.8         | 287.0      | 1.6         |
| 213277_at    | ZFP36L1     | 1.26E-03 | 47.8       | 47.4       | 55.2       | 50.2        | 49.9        | 52.8        | 51.4        | 58.3    | 71.7    | 70.1    | 68.3     | 66.8     | 83.8     | 77.1     | 50.2          | 70.1       | 1.4         |
| 207920_x_at  | ZFX         | 5.12E-04 | 270.1      | 254.3      | 389.1      | 349.2       | 490.7       | 327.8       | 422.7       | 413.3   | 520.9   | 978.3   | 501.5    | 670.8    | 634.2    | 783.6    | 349.2         | 634.2      | 1.8         |
| 217176_s_at  | ZFX         | 9.30E-03 | 64.4       | 43.2       | 58.3       | 62.7        | 72.8        | 44.9        | 75.1        | 69.1    | 110.0   | 170.8   | 101.3    | 71.7     | 94.0     | 125.4    | 62.7          | 101.3      | 1.6         |
| 207247_s_at  | ZFX /// ZFY | 5.62E-03 | 125.8      | 145.6      | 222.5      | 209.7       | 293.1       | 214.7       | 255.0       | 259.5   | 194.8   | 523.4   | 278.0    | 322.7    | 297.6    | 378.2    | 214.7         | 297.6      | 1.4         |
| 203556_at    | ZHX2        | 1.88E-03 | 507.7      | 331.5      | 644.9      | 580.2       | 709.3       | 591.0       | 811.8       | 733.4   | 775.2   | 1456.6  | 850.8    | 862.2    | 947.2    | 1175.4   | 591.0         | 862.2      | 1.5         |
| 54970_at     | ZMIZ2       | 4.14E-03 | 1334.0     | 1110.8     | 1476.2     | 1388.9      | 1382.6      | 1187.1      | 1299.6      | 1834.3  | 1448.9  | 1783.4  | 1577.3   | 1844.1   | 1700.7   | 1606.3   | 1334.0        | 1700.7     | 1.3         |
| 202049_s_at  | ZMYM4       | 3.79E-03 | 161.8      | 167.3      | 219.6      | 176.2       | 260.8       | 235.5       | 204.8       | 230.1   | 238.5   | 378.4   | 309.7    | 301.2    | 266.3    | 281.3    | 204.8         | 281.3      | 1.4         |
| 1554158_at   | ZMYND11     | 8.91E-03 | 64.3       | 56.3       | 74.5       | 83.6        | 89.4        | 86.9        | 63.1        | 100.0   | 79.5    | 175.6   | 139.0    | 89.4     | 118.2    | 78.5     | 74.5          | 100.0      | 1.3         |
| 243312_at    | ZNF107      | 6.97E-03 | 47.5       | 64.3       | 63.5       | 46.0        | 61.0        | 47.2        | 52.7        | 61.7    | 104.1   | 123.8   | 88.1     | 75.1     | 50.1     | 67.1     | 52.7          | 75.1       | 1.4         |
| 214706_at    | ZNF200      | 1.91E-03 | 47.4       | 51.1       | 74.0       | 60.3        | 61.7        | 57.0        | 73.2        | 72.3    | 75.4    | 114.8   | 89.4     | 67.8     | 72.2     | 105.4    | 60.3          | 75.4       | 1.3         |
| 219540_at    | ZNF267      | 1.46E-03 | 210.5      | 188.9      | 229.7      | 278.8       | 332.4       | 276.2       | 377.3       | 376.3   | 365.7   | 680.9   | 462.7    | 440.3    | 391.8    | 569.7    | 276.2         | 440.3      | 1.6         |
| 231704_at    | ZNF498      | 3.35E-04 | 113.0      | 52.9       | 104.7      | 89.4        | 190.6       | 78.8        | 190.6       | 244.5   | 297.5   | 863.0   | 373.8    | 366.1    | 467.1    | 487.2    | 104.7         | 373.8      | 3.6         |
| 220617_s_at  | ZNF532      | 4.65E-03 | 150.1      | 185.7      | 263.3      | 287.8       | 299.1       | 240.8       | 239.6       | 243.4   | 216.4   | 346.0   | 338.5    | 414.4    | 289.4    | 352.0    | 240.8         | 338.5      | 1.4         |
| 219711_at    | ZNF586      | 4.66E-03 | 171.7      | 226.5      | 214.9      | 210.1       | 246.8       | 208.3       | 239.1       | 238.0   | 328.6   | 369.4   | 257.8    | 275.8    | 250.6    | 341.9    | 214.9         | 275.8      | 1.3         |
| 226590_at    | ZNF618      | 8.70E-04 | 73.2       | 73.2       | 88.1       | 68.1        | 59.4        | 57.9        | 48.0        | 115.1   | 137.4   | 192.9   | 116.6    | 108.8    | 100.4    | 198.0    | 68.1          | 116.6      | 1.7         |
| 226592_at    | ZNF618      | 2.52E-03 | 40.0       | 44.8       | 53.5       | 29.7        | 46.0        | 41.2        | 33.7        | 63.3    | 66.4    | 122.2   | 79.2     | 62.2     | 57.0     | 116.5    | 41.2          | 66.4       | 1.6         |
| 238444_at    | ZNF618      | 3.42E-04 | 40.8       | 26.4       | 40.8       | 47.1        | 33.2        | 42.6        | 33.7        | 71.1    | 49.6    | 91.4    | 73.4     | 61.5     | 56.0     | 84.5     | 40.8          | 71.1       | 1.7         |
| 227080_at    | ZNF697      | 1.26E-03 | 167.1      | 168.3      | 206.3      | 256.5       | 343.1       | 158.2       | 347.3       | 301.9   | 251.9   | 470.8   | 332.9    | 450.9    | 276.7    | 495.8    | 206.3         | 332.9      | 1.6         |
| 206557_at    | ZNF702P     | 1.02E-04 | 71.0       | 39.9       | 64.6       | 86.2        | 73.3        | 91.3        | 68.9        | 152.4   | 66.9    | 152.8   | 190.4    | 145.1    | 137.0    | 113.5    | 71.0          | 145.1      | 2.0         |
| 225076_s_at  | ZNFX1       | 1.37E-05 | 379.2      | 362.9      | 372.5      | 401.6       | 484.2       | 384.4       | 439.8       | 815.0   | 832.5   | 1355.8  | 926.8    | 1188.7   | 1001.1   | 1312.2   | 384.4         | 1001.1     | 2.6         |
| 223382_s_at  | ZNRF1       | 6.61E-03 | 62.4       | 51.1       | 47.3       | 56.1        | 76.8        | 50.1        | 49.0        | 84.3    | 57.8    | 75.3    | 72.5     | 81.1     | 77.3     | 80.6     | 51.1          | 77.3       | 1.5         |
| 226261_at    | ZNRF2       | 3.73E-04 | 386.4      | 403.1      | 435.1      | 474.0       | 513.0       | 514.4       | 467.3       | 598.1   | 667.0   | 804.2   | 695.4    | 721.3    | 670.8    | 743.7    | 467.3         | 695.4      | 1.5         |
| 1555157_at   | —           | 8.12E-04 | 35.7       | 36.3       | 41.0       | 39.3        | 53.3        | 28.9        | 55.9        | 51.6    | 68.0    | 226.7   | 130.6    | 101.7    | 119.8    | 165.0    | 39.3          | 119.8      | 3.0         |
| 1555303_at   | —           | 7.35E-03 | 77.1       | 78.8       | 96.6       | 105.1       | 90.3        | 87.1        | 91.2        | 98.2    | 88.7    | 116.2   | 157.7    | 124.0    | 136.9    | 102.9    | 90.3          | 116.2      | 1.3         |
| 1555853_at   | —           | 8.77E-05 | 157.3      | 129.6      | 172.5      | 151.6       | 155.2       | 141.8       | 145.2       | 248.0   | 232.7   | 537.5   | 319.6    | 379.1    | 347.7    | 400.8    | 151.6         | 347.7      | 2.3         |
| 1555976_s_at | —           | 9.85E-03 | 46.7       | 53.4       | 66.9       | 59.1        | 63.3        | 59.3        | 69.5        | 73.0    | 57.1    | 123.4   | 75.5     | 88.8     | 65.4     | 92.0     | 59.3          | 75.5       | 1.3         |
| 1555977_at   | —           | 4.03E-03 | 880.2      | 959.3      | 900.7      | 899.5       | 651.0       | 693.8       | 746.0       | 976.2   | 1114.4  | 1358.4  | 1226.3   | 1074.0   | 933.1    | 1266.9   | 880.2         | 1114.4     | 1.3         |
| 1556021_at   | —           | 4.71E-03 | 38.8       | 63.2       | 93.7       | 74.4        | 74.5        | 86.8        | 95.1        | 93.0    | 93.1    | 171.2   | 131.0    | 107.0    | 109.1    | 100.6    | 74.5          | 107.0      | 1.4         |
| 1556153_s_at | —           | 3.76E-03 | 42.5       | 50.8       | 53.4       | 49.2        | 49.2        | 41.6        | 46.6        | 49.2    | 75.8    | 127.6   | 107.1    | 57.7     | 70.7     | 124.4    | 49.2          | 75.8       | 1.5         |
| 1556297_a_at | —           | 3.24E-03 | 53.9       | 54.0       | 42.4       | 51.0        | 51.0        | 39.7        | 53.6        | 59.0    | 81.2    | 130.8   | 94.2     | 82.3     | 69.9     | 83.9     | 51.0          | 82.3       | 1.6         |
| 1556321_a_at | —           | 1.74E-03 | 173.4      | 146.4      | 182.8      | 176.5       | 193.7       | 158.2       | 202.6       | 224.3   | 274.6   | 645.5   | 357.2    | 253.7    | 313.6    | 394.6    | 176.5         | 313.6      | 1.8         |
| 1556332_at   | —           | 1.60E-05 | 76.9       | 43.9       | 52.6       | 46.8        | 107.9       | 44.8        | 93.0        | 245.7   | 198.7   | 423.7   | 235.8    | 292.1    | 252.4    | 438.7    | 52.6          | 252.4      | 4.8         |
| 1556352_at   | —           | 6.54E-04 | 40.0       | 64.7       | 51.9       | 81.0        | 66.1        | 64.6        | 59.0        | 65.6    | 101.2   | 124.8   | 156.2    | 83.1     | 101.0    | 97.2     | 64.6          | 101.0      | 1.6         |
| 1556663_s_at | —           | 7.49E-03 | 47.6       | 40.3       | 41.3       | 40.2        | 63.8        | 52.4        | 53.4        | 70.5    | 53.0    | 54.5    | 77.8     | 74.4     | 82.5     | 56.6     | 47.6          | 70.5       | 1.5         |
| 1556669_a_at | —           | 1.28E-03 | 26.2       | 35.6       | 25.7       | 27.8        | 22.6        | 22.2        | 26.0        | 36.1    | 46.7    | 76.2    | 53.4     | 75.4     | 73.2     | 100.2    | 26.0          | 73.2       | 2.8         |
| 1557193_at   | —           | 6.07E-03 | 112.5      | 75.2       | 153.4      | 136.2       | 163.1       | 126.2       | 164.6       | 142.4   | 130.5   | 219.0   | 173.7    | 177.0    | 188.5    | 198.1    | 136.2         | 177.0      | 1.3         |
| 1557418_at   | —           | 5.37E-03 | 180.6      | 129.4      | 157.0      | 174.9       | 122.6       | 101.3       | 149.5       | 178.5   | 161.5   | 238.2   | 249.7    | 196.3    | 204.0    | 284.6    | 149.5         | 204.0      | 1.4         |
| 1558299_at   | —           | 5.51E-03 | 438.0      | 358.3      | 454.9      | 384.8       | 484.0       | 444.3       | 403.9       | 470.6   | 485.5   | 600.5   | 536.2    | 606.1    | 542.8    | 635.9    | 438.0         | 542.8      | 1.2         |
| 1558783_at   | —           | 3.37E-03 | 49.6       | 39.4       | 49.6       | 38.1        | 49.6        | 49.8        | 51.9        | 65.0    | 60.6    | 179.4   | 74.4     | 78.0     | 66.8     | 101.2    | 49.6          | 74.4       | 1.5         |
| 1558938_at   | —           | 4.42E-03 | 310.9      | 563.2      | 516.5      | 458.2       | 379.3       | 428.5       | 427.0       | 490.3   | 643.9   | 928.7   | 734.0    | 543.1    | 456.0    | 622.6    | 428.5         | 622.6      | 1.5         |
| 1559391_s_at | —           | 3.70E-04 | 26.6       | 40.7       | 60.1       | 52.8        | 62.2        | 57.0        | 60.2        | 67.8    | 68.4    | 211.5   | 134.4    | 92.8     | 113.3    | 108.0    | 57.0          | 108.0      | 1.9         |
| 1559530_at   | —           | 7.75E-03 | 790.1      | 681.5      | 956.7      | 684.3       | 887.4       | 708.9       | 626.2       | 838.5   | 895.3   | 1421.1  | 728.9    | 1332.7   | 1020.0   | 998.2    | 708.9         | 998.2      | 1.4         |
| 1559573_at   | —           | 7.57E-06 | 32.9       | 22.2       | 36.5       | 36.3        | 55.0        | 24.8        | 44.0        | 123.2   | 111.7   | 248.5   | 154.9    | 171.2    | 141.3    | 148.1    | 36.3          | 148.1      | 4.1         |
| 1560034_a_at | —           | 1.21E-03 | 39.4       | 47.0       | 35.6       | 20.9        | 31.2        | 21.4        | 26.9        | 50.7    | 65.7    | 59.8    | 53.3     | 71.8     | 35.9     | 76.3     | 31.2          | 59.8       | 1.9         |
| 1560108_at   | —           | 5.48E-03 | 46.2       | 50.9       | 47.7       | 52.7        | 58.3        | 42.5        | 49.8        | 62.9    | 54.6    | 64.9    | 66.2     | 72.8     | 73.4     | 83.7     | 49.8          | 66.2       | 1.3         |
| 1560109_s_at | —           | 1.84E-04 | 107.3      | 145.5      | 138.3      | 141.9       | 199.5       | 155.5       | 197.8       | 245.9   | 251.5   | 513.5   | 329.8    | 331.0    | 297.5    | 466.9    | 145.5         | 329.8      | 2.3         |
| 1560156_at   | —           | 4.28E-05 | 67.0       | 34.7       | 74.2       | 83.3        | 58.6        | 60.1        | 104.1       | 201.9   | 108.0   | 542.0   | 224.0    | 178.3    | 217.4    | 288.4    | 67.0          | 217.4      | 3.2         |
| 1560622_at   | —           | 1.01E-03 | 101.9      | 79.6       | 131.2      | 134.8       | 129.6       | 108.7       | 174.3       | 136.7   | 136.7   | 247.1   | 214.8    | 193.9    | 148.1    | 215.0    | 129.6         | 193.9      | 1.5         |
| 1560705_at   | —           | 3.95E-04 | 106.5      | 117.2      | 130.6      | 129.7       | 152.2       | 106.0       | 118.5       | 200.5   | 209.3   | 405.8   | 217.1    | 220.3    | 183.1    | 265.4    | 118.5         | 217.1      | 1.8         |
| 1560817_at   | —           | 8.55E-05 | 78.8       | 93.9       | 99.2       | 78.9        | 64.3        | 68.7        | 84.2        | 113.8   | 154.7   | 191.4   | 139.5    | 144.0    | 140.4    | 168.7    | 78.9          | 144.0      | 1.8         |
| 1560978_at   | —           | 4.29E-03 | 48.6       | 49.8       | 41.1       | 38.3        | 43.2        | 42.5        | 42.7        | 60.2    | 73.7    | 56.3    | 45.3     | 62.1     | 47.6     | 58.3     | 42.7          | 58.3       | 1.4         |
| 1561056_a_at | —           | 6.56E-05 | 32.6       | 18.9       | 43.0       | 38.6        | 35.3        | 27.7        | 39.1        | 46.8    | 47.9    | 81.9    | 91.6     | 73.9     | 63.5     | 87.6     | 35.3          | 73.9       | 2.1         |
| 1561469_at   | —           | 1.30E-03 | 55.4       | 52.2       | 39.3       | 22.8        | 57.1        | 40.7        | 53.5        | 82.0    | 123.8   | 305.7   | 99.4     | 101.2    | 133.3    | 137.4    | 52.2          | 123.8      | 2.4         |
| 1561654_at   | —           | 1.40E-03 | 54.7       | 52.8       | 32.0       | 38.6        | 61.9        | 39.7        | 62.7        | 66.0    | 102.9   | 208.3   | 130.7    | 143.8    | 115.8    | 164.6    | 52.8          | 130.7      | 2.5         |
| 1561738_at   | —           | 1.00E-03 | 58.9       | 56.5       | 39.8       | 27.9        | 49.6        | 25.4        | 34.6        | 102.3   | 120.8   | 412.0   | 166.7    | 107.5    | 86.1     | 139.4    | 39.8          | 120.8      | 3.0         |
| 1562056_at   | —           | 3.38E-03 | 44.0       | 36.0       | 37.2       | 57.8        | 46.4        | 50.9        | 50.5        | 69.6    | 41.9    | 62.0    | 116.9    | 102.2    | 55.7     | 83.9     | 46.4          | 69.6       | 1.5         |
| 1562940_at   | —           | 6.79E-03 | 49.8       | 51.7       | 63.7       | 63.7        | 72.8        | 58.7        | 65.1        | 94.9    | 63.1    | 91.8    | 79.2     | 90.5     | 73.1     | 80.2     | 63.7          | 80.2       | 1.3         |
| 1563010_at   | —           | 1.69E-03 | 63.4       | 51.0       | 52.3       |             |             |             |             |         |         |         |          |          |          |          |               |            |             |



Supplementary Table S1. Continued.

| ID           | Gene Symbol | p-value  | VW3_Saline | VW6_Saline | VW7_Saline | VW13_Saline | VW22_Saline | VW23_Saline | VW25_Saline | VW3_LPS | VW6_LPS | VW7_LPS | VW13_LPS | VW22_LPS | VW23_LPS | VW25_LPS | Median_saline | Median_LPS | Fold change |
|--------------|-------------|----------|------------|------------|------------|-------------|-------------|-------------|-------------|---------|---------|---------|----------|----------|----------|----------|---------------|------------|-------------|
| 1566257_at   | —           | 6.84E-03 | 95.0       | 106.9      | 118.8      | 87.2        | 122.4       | 123.1       | 107.5       | 114.0   | 140.1   | 212.9   | 159.0    | 133.4    | 149.9    | 166.3    | 107.5         | 149.9      | 1.4         |
| 1566623_at   | —           | 1.22E-03 | 24.7       | 27.0       | 35.8       | 29.6        | 43.2        | 32.7        | 45.2        | 37.2    | 50.9    | 83.2    | 66.9     | 57.3     | 46.1     | 62.6     | 32.7          | 57.3       | 1.8         |
| 1566709_at   | —           | 1.49E-04 | 50.8       | 46.1       | 44.8       | 53.4        | 61.3        | 50.3        | 66.0        | 75.7    | 77.8    | 135.6   | 155.8    | 145.2    | 115.5    | 145.6    | 50.8          | 135.6      | 2.7         |
| 1568832_a_at | —           | 2.72E-03 | 96.4       | 83.4       | 107.4      | 73.7        | 118.5       | 71.9        | 82.5        | 114.4   | 110.0   | 253.7   | 136.6    | 147.2    | 152.1    | 155.1    | 83.4          | 147.2      | 1.8         |
| 1568941_a_at | —           | 4.49E-03 | 279.9      | 254.7      | 306.7      | 290.5       | 342.0       | 255.8       | 360.8       | 300.0   | 411.8   | 770.5   | 511.7    | 402.3    | 463.9    | 569.0    | 290.5         | 463.9      | 1.6         |
| 1569403_at   | —           | 2.09E-03 | 230.9      | 177.6      | 312.0      | 285.1       | 229.1       | 167.1       | 337.7       | 316.1   | 330.5   | 802.1   | 373.8    | 318.8    | 357.3    | 473.3    | 230.9         | 357.3      | 1.5         |
| 1569672_at   | —           | 2.71E-03 | 184.9      | 164.4      | 333.0      | 274.6       | 246.7       | 208.2       | 290.6       | 312.7   | 212.8   | 449.5   | 464.8    | 300.5    | 263.4    | 373.9    | 246.7         | 312.7      | 1.3         |
| 1570022_at   | —           | 1.14E-04 | 23.3       | 24.6       | 33.3       | 38.7        | 28.2        | 25.5        | 28.7        | 48.9    | 65.7    | 149.8   | 142.6    | 45.5     | 77.7     | 87.0     | 28.2          | 77.7       | 2.8         |
| 1570197_at   | —           | 5.16E-03 | 56.9       | 78.2       | 80.5       | 61.0        | 80.5        | 72.8        | 53.7        | 75.4    | 95.4    | 198.1   | 89.0     | 197.1    | 85.2     | 106.3    | 72.8          | 95.4       | 1.3         |
| 1570198_x_at | —           | 3.08E-04 | 70.8       | 107.6      | 75.2       | 65.7        | 89.0        | 75.2        | 84.6        | 102.4   | 169.2   | 155.3   | 105.7    | 186.8    | 104.6    | 169.0    | 75.2          | 155.3      | 2.1         |
| 1570541_s_at | —           | 6.17E-06 | 39.3       | 30.0       | 52.6       | 31.5        | 49.1        | 26.7        | 40.3        | 147.4   | 124.8   | 451.0   | 158.9    | 186.0    | 146.8    | 223.0    | 39.3          | 158.9      | 4.0         |
| 210824_at    | —           | 3.17E-04 | 1616.3     | 1096.0     | 1533.2     | 1116.7      | 1455.3      | 1097.3      | 1815.0      | 2552.5  | 1885.5  | 2817.6  | 2065.1   | 2151.9   | 2652.2   | 2553.3   | 1455.3        | 2552.5     | 1.8         |
| 211388_s_at  | —           | 1.78E-03 | 428.8      | 351.6      | 395.5      | 447.3       | 434.3       | 361.5       | 505.5       | 527.2   | 476.9   | 651.2   | 686.3    | 627.0    | 782.6    | 686.3    | 428.8         | 651.2      | 1.5         |
| 213294_at    | —           | 9.36E-03 | 270.8      | 480.3      | 578.5      | 525.8       | 536.7       | 599.6       | 594.1       | 602.0   | 606.7   | 930.6   | 844.4    | 662.5    | 583.8    | 938.3    | 536.7         | 662.5      | 1.2         |
| 214854_at    | —           | 9.66E-04 | 64.7       | 49.4       | 65.2       | 75.0        | 82.8        | 54.6        | 91.7        | 85.6    | 80.0    | 150.3   | 122.6    | 155.7    | 150.6    | 131.4    | 65.2          | 131.4      | 2.0         |
| 215062_at    | —           | 1.47E-03 | 180.7      | 214.0      | 187.7      | 202.8       | 168.4       | 151.4       | 177.2       | 209.2   | 281.3   | 265.4   | 302.7    | 262.1    | 200.2    | 267.8    | 180.7         | 265.4      | 1.5         |
| 215252_at    | —           | 5.32E-03 | 920.5      | 927.7      | 1165.2     | 1153.1      | 992.2       | 924.5       | 1180.5      | 1062.9  | 1217.5  | 1694.1  | 1387.3   | 1170.0   | 1176.9   | 1586.4   | 992.2         | 1217.5     | 1.2         |
| 216062_at    | —           | 8.42E-04 | 291.5      | 196.8      | 272.1      | 379.9       | 346.1       | 326.5       | 337.2       | 295.1   | 566.0   | 704.2   | 758.0    | 814.6    | 740.5    | 745.4    | 326.5         | 740.5      | 2.3         |
| 216565_x_at  | —           | 2.53E-04 | 192.0      | 127.0      | 207.7      | 183.1       | 97.3        | 148.0       | 86.0        | 354.2   | 280.1   | 515.0   | 340.9    | 352.0    | 323.7    | 408.8    | 148.0         | 352.0      | 2.4         |
| 216656_at    | —           | 3.58E-03 | 191.0      | 181.5      | 221.8      | 218.0       | 229.3       | 176.9       | 219.4       | 246.5   | 210.3   | 284.0   | 255.8    | 341.1    | 272.4    | 314.6    | 218.0         | 272.4      | 1.2         |
| 216871_at    | —           | 1.02E-04 | 55.1       | 56.1       | 85.5       | 72.5        | 95.8        | 81.8        | 88.0        | 101.5   | 130.5   | 231.5   | 156.3    | 160.8    | 125.5    | 177.5    | 81.8          | 156.3      | 1.9         |
| 217654_at    | —           | 2.93E-04 | 37.3       | 38.6       | 73.9       | 38.6        | 76.0        | 58.4        | 72.3        | 69.2    | 76.1    | 256.0   | 89.5     | 120.7    | 104.3    | 127.6    | 58.4          | 104.3      | 1.8         |
| 220467_at    | —           | 7.11E-03 | 41.1       | 32.4       | 45.7       | 37.7        | 55.8        | 48.0        | 50.3        | 46.2    | 52.1    | 114.5   | 70.9     | 66.5     | 58.2     | 82.4     | 45.7          | 66.5       | 1.5         |
| 220905_at    | —           | 9.47E-03 | 56.5       | 47.7       | 61.9       | 68.4        | 69.0        | 64.2        | 64.9        | 70.7    | 56.4    | 76.8    | 82.9     | 75.1     | 91.0     | 82.8     | 64.2          | 76.8       | 1.2         |
| 221155_x_at  | —           | 5.18E-04 | 166.1      | 142.5      | 160.2      | 207.5       | 177.9       | 203.1       | 218.0       | 226.8   | 237.3   | 399.8   | 324.6    | 361.2    | 322.0    | 341.0    | 177.9         | 324.6      | 1.8         |
| 221969_at    | —           | 1.43E-04 | 41.3       | 56.7       | 31.8       | 66.7        | 38.0        | 38.5        | 26.5        | 105.9   | 178.8   | 319.3   | 208.5    | 124.3    | 225.6    | 230.4    | 38.5          | 208.5      | 5.4         |
| 222189_at    | —           | 9.97E-03 | 146.9      | 171.4      | 196.0      | 182.7       | 186.3       | 177.6       | 159.8       | 201.8   | 227.8   | 230.6   | 216.6    | 228.8    | 199.4    | 189.9    | 177.6         | 216.6      | 1.2         |
| 222303_at    | —           | 2.50E-04 | 110.1      | 114.7      | 140.9      | 89.9        | 104.1       | 84.9        | 116.5       | 165.4   | 215.5   | 565.3   | 202.6    | 235.4    | 188.9    | 342.5    | 110.1         | 215.5      | 2.0         |
| 222326_at    | —           | 3.59E-03 | 26.0       | 24.7       | 22.1       | 23.6        | 28.2        | 24.7        | 21.7        | 38.0    | 61.7    | 219.9   | 66.7     | 66.6     | 37.2     | 61.5     | 24.7          | 61.7       | 2.5         |
| 226107_at    | —           | 8.29E-03 | 65.2       | 100.7      | 111.8      | 105.2       | 91.6        | 89.6        | 124.5       | 89.3    | 103.9   | 160.7   | 166.1    | 136.8    | 103.5    | 152.2    | 100.7         | 136.8      | 1.4         |
| 226345_at    | —           | 2.36E-04 | 189.9      | 287.5      | 276.4      | 242.1       | 349.0       | 274.1       | 298.9       | 376.0   | 543.5   | 1045.7  | 422.4    | 657.2    | 505.6    | 708.9    | 276.4         | 543.5      | 2.0         |
| 226560_at    | —           | 4.37E-04 | 56.4       | 52.9       | 31.6       | 44.2        | 59.4        | 39.7        | 46.1        | 140.2   | 98.8    | 354.1   | 166.9    | 222.4    | 126.6    | 156.5    | 46.1          | 156.5      | 3.4         |
| 226725_at    | —           | 4.39E-04 | 312.0      | 167.9      | 413.7      | 529.9       | 481.7       | 350.0       | 344.4       | 590.4   | 264.1   | 925.8   | 983.5    | 659.5    | 836.3    | 1071.5   | 350.0         | 836.3      | 2.4         |
| 227107_at    | —           | 3.42E-04 | 127.9      | 131.3      | 146.7      | 167.0       | 162.1       | 175.4       | 251.2       | 250.6   | 261.4   | 414.6   | 274.5    | 232.1    | 276.9    | 457.5    | 162.1         | 274.5      | 1.7         |
| 227193_at    | —           | 5.46E-05 | 62.4       | 59.4       | 71.4       | 62.4        | 83.0        | 44.9        | 115.9       | 138.4   | 140.4   | 399.3   | 247.1    | 209.4    | 143.7    | 341.0    | 62.4          | 209.4      | 3.4         |
| 227200_at    | —           | 2.12E-03 | 463.5      | 617.8      | 750.3      | 714.9       | 910.3       | 771.5       | 891.5       | 845.9   | 991.4   | 1082.4  | 1016.5   | 1024.3   | 1027.3   | 1212.7   | 750.3         | 1024.3     | 1.4         |
| 227333_at    | —           | 3.62E-03 | 178.7      | 117.2      | 181.9      | 189.1       | 297.0       | 174.4       | 390.7       | 252.7   | 294.1   | 585.7   | 282.4    | 343.6    | 344.8    | 604.4    | 181.9         | 343.6      | 1.9         |
| 227368_at    | —           | 6.36E-03 | 129.4      | 160.0      | 189.0      | 175.9       | 181.0       | 193.7       | 251.2       | 211.9   | 218.7   | 396.7   | 258.6    | 249.7    | 205.2    | 303.8    | 181.0         | 249.7      | 1.4         |
| 227458_at    | —           | 8.67E-05 | 1317.9     | 1069.1     | 1560.7     | 1756.3      | 2305.4      | 1596.9      | 2235.6      | 3211.6  | 4214.5  | 5162.0  | 4275.1   | 3896.7   | 3809.4   | 4665.5   | 1596.9        | 4214.5     | 2.6         |
| 227501_at    | —           | 4.09E-04 | 412.0      | 439.3      | 479.2      | 563.6       | 509.5       | 362.3       | 485.1       | 565.3   | 707.6   | 1169.0  | 871.7    | 792.8    | 636.2    | 878.0    | 479.2         | 792.8      | 1.7         |
| 227571_at    | —           | 5.15E-04 | 84.3       | 52.3       | 95.5       | 76.9        | 129.5       | 60.8        | 98.7        | 117.6   | 119.6   | 205.7   | 112.0    | 203.2    | 150.4    | 166.0    | 84.3          | 150.4      | 1.8         |
| 227621_at    | —           | 2.09E-03 | 2918.4     | 2933.4     | 3750.2     | 4004.5      | 4448.7      | 3759.3      | 4598.3      | 3905.1  | 5412.9  | 7861.6  | 5794.6   | 5246.5   | 5219.3   | 6892.2   | 3759.3        | 5412.9     | 1.4         |
| 227749_at    | —           | 2.52E-05 | 90.1       | 64.2       | 53.2       | 81.6        | 80.6        | 54.5        | 100.7       | 206.2   | 153.0   | 260.5   | 351.3    | 291.9    | 263.5    | 329.6    | 80.6          | 263.5      | 3.3         |
| 227755_at    | —           | 5.55E-03 | 381.2      | 330.7      | 704.9      | 567.4       | 698.0       | 625.0       | 630.2       | 540.0   | 644.6   | 1220.3  | 861.2    | 705.8    | 772.4    | 883.4    | 625.0         | 772.4      | 1.2         |
| 227985_at    | —           | 4.37E-04 | 204.3      | 142.5      | 231.3      | 192.5       | 321.7       | 192.3       | 385.7       | 479.5   | 711.3   | 1730.7  | 525.1    | 533.5    | 781.2    | 964.4    | 204.3         | 711.3      | 3.5         |
| 228478_at    | —           | 4.75E-03 | 66.2       | 76.6       | 108.5      | 130.6       | 130.9       | 110.0       | 154.2       | 134.6   | 120.0   | 200.3   | 213.0    | 156.9    | 128.2    | 180.4    | 110.0         | 156.9      | 1.4         |
| 228498_at    | —           | 3.66E-03 | 10907.0    | 8583.2     | 8406.7     | 10810.2     | 12246.8     | 8465.6      | 11447.0     | 12271.1 | 13266.7 | 15096.5 | 14555.0  | 14695.7  | 15599.8  | 15803.0  | 10810.2       | 14695.7    | 1.4         |
| 228589_at    | —           | 1.96E-03 | 127.5      | 118.5      | 80.0       | 84.1        | 110.9       | 76.3        | 104.7       | 142.7   | 173.9   | 258.4   | 147.2    | 234.5    | 237.7    | 307.9    | 104.7         | 234.5      | 2.2         |
| 228612_at    | —           | 7.65E-03 | 170.6      | 172.3      | 292.2      | 269.8       | 261.4       | 248.0       | 340.3       | 215.1   | 261.4   | 494.1   | 321.9    | 329.8    | 286.3    | 401.3    | 261.4         | 321.9      | 1.2         |
| 228657_at    | —           | 4.44E-03 | 203.7      | 136.4      | 159.4      | 180.3       | 184.2       | 167.0       | 198.6       | 249.0   | 245.7   | 355.4   | 202.9    | 232.6    | 257.3    | 360.2    | 180.3         | 249.0      | 1.4         |
| 228714_at    | —           | 6.61E-03 | 188.8      | 183.4      | 215.9      | 175.6       | 198.5       | 155.6       | 160.4       | 216.2   | 236.2   | 304.7   | 242.7    | 215.7    | 203.7    | 264.0    | 183.4         | 236.2      | 1.3         |
| 228812_at    | —           | 6.50E-03 | 239.2      | 280.1      | 488.6      | 417.7       | 508.8       | 486.9       | 497.5       | 371.6   | 437.3   | 870.3   | 477.6    | 522.6    | 642.7    | 738.5    | 486.9         | 522.6      | 1.1         |
| 228828_at    | —           | 4.58E-03 | 209.8      | 84.1       | 117.3      | 140.6       | 147.2       | 153.7       | 178.9       | 148.0   | 109.6   | 188.2   | 208.5    | 149.3    | 223.8    | 239.5    | 140.6         | 188.2      | 1.3         |
| 228910_at    | —           | 1.01E-04 | 291.4      | 147.1      | 411.4      | 397.2       | 479.2       | 345.3       | 665.4       | 536.6   | 454.1   | 1068.4  | 809.2    | 794.3    | 918.2    | 1225.5   | 397.2         | 809.2      | 2.0         |
| 228918_at    | —           | 2.57E-05 | 325.6      | 210.3      | 231.1      | 305.8       | 498.0       | 264.4       | 430.3       | 697.3   | 566.9   | 824.4   | 731.9    | 1089.8   | 1066.8   | 1244.0   | 305.8         | 824.4      | 2.7         |
| 229041_s_at  | —           | 2.32E-04 | 81.0       | 90.7       | 69.7       | 96.3        | 109.5       | 61.5        | 65.8        | 146.3   | 138.2   | 128.4   | 134.4    | 222.5    | 90.4     | 135.4    | 81.0          | 135.4      | 1.7         |
| 229074_at    | —           | 4.58E-03 | 1678.6     | 2021.4     | 1468.7     | 1671.8      | 1618.3      | 1450.3      | 1430.3      | 1830.9  | 2490.7  | 2070.1  | 2179.6   | 2111.6   | 1875.4   | 2176.5   | 1618.3        | 2111.6     | 1.3         |
| 229188_s_at  | —           | 2.54E-03 | 106.3      | 123.4      | 147.8      | 136.5       | 171.9       | 145.9       | 139.5       | 209.1   | 153.3   | 237.3   | 178.6    | 225.0    | 192.7    | 193.8    | 139.5         | 193.8      | 1.4         |
| 229242_at    | —           | 1.67E-04 | 56.1       | 29.7       | 33.1       | 31.6        | 82.8        | 33.9        | 70.8        | 120.3   | 95.6    | 324.7   | 177.5    | 315.6    | 85.6     | 331.3    | 33.1          | 177.5      | 5.2         |
| 229373_at    | —           | 1.72E-03 | 57.1       | 38.0       | 48.1       | 37.1        | 44.5        | 36.6        | 41.6        | 65.3    | 59.9</  |         |          |          |          |          |               |            |             |

TRANSCRIPTION PROFILES IN ALVEOLAR MACROPHAGES

Supplementary Table S1. Continued.

| ID          | Gene Symbol | p-value  | VW3_Saline | VW6_Saline | VW7_Saline | VW13_Saline | VW22_Saline | VW23_Saline | VW25_Saline | VW3_LPS | VW6_LPS | VW7_LPS | VW13_LPS | VW22_LPS | VW23_LPS | VW25_LPS | Median_saline | Median_LPS | Fold change |
|-------------|-------------|----------|------------|------------|------------|-------------|-------------|-------------|-------------|---------|---------|---------|----------|----------|----------|----------|---------------|------------|-------------|
| 230161_at   | —           | 2.76E-03 | 444.0      | 616.3      | 279.6      | 315.2       | 285.0       | 274.3       | 298.4       | 568.2   | 839.5   | 548.2   | 407.2    | 347.1    | 404.7    | 548.7    | 298.4         | 548.2      | 1.8         |
| 230260_s_at | —           | 9.77E-04 | 34.5       | 29.0       | 57.4       | 48.0        | 70.7        | 40.0        | 57.0        | 61.5    | 43.5    | 105.9   | 65.1     | 95.6     | 60.9     | 71.0     | 48.0          | 65.1       | 1.4         |
| 230267_at   | —           | 1.06E-03 | 209.6      | 221.8      | 218.1      | 195.9       | 266.7       | 221.4       | 220.5       | 312.0   | 381.2   | 501.1   | 286.2    | 310.5    | 424.9    | 418.9    | 220.5         | 381.2      | 1.7         |
| 230278_at   | —           | 5.20E-03 | 60.5       | 64.7       | 128.8      | 122.2       | 136.9       | 110.0       | 157.1       | 124.0   | 105.9   | 231.5   | 194.5    | 162.8    | 139.2    | 169.1    | 122.2         | 162.8      | 1.3         |
| 230314_at   | —           | 9.56E-04 | 45.9       | 53.5       | 51.3       | 45.5        | 47.3        | 49.2        | 44.0        | 74.6    | 75.2    | 137.9   | 83.4     | 82.8     | 62.9     | 95.9     | 47.3          | 82.8       | 1.8         |
| 230333_at   | —           | 2.93E-04 | 3096.9     | 3904.9     | 2913.9     | 2284.3      | 3127.0      | 2829.4      | 2731.5      | 3982.5  | 5764.5  | 5000.0  | 4428.9   | 4949.8   | 4721.1   | 4344.5   | 2913.9        | 4721.1     | 1.6         |
| 230383_x_at | —           | 3.79E-03 | 116.5      | 77.5       | 142.2      | 181.0       | 145.9       | 121.3       | 126.5       | 148.4   | 96.5    | 305.2   | 321.4    | 168.7    | 219.3    | 308.1    | 126.5         | 219.3      | 1.7         |
| 230387_at   | —           | 7.17E-03 | 139.9      | 134.7      | 244.7      | 234.2       | 185.9       | 214.4       | 236.1       | 203.7   | 243.8   | 459.6   | 405.7    | 217.1    | 245.6    | 261.0    | 214.4         | 245.6      | 1.1         |
| 230446_at   | —           | 8.68E-03 | 92.7       | 81.4       | 89.7       | 92.1        | 94.4        | 99.5        | 101.3       | 140.4   | 105.1   | 166.1   | 96.9     | 144.1    | 109.1    | 142.2    | 92.7          | 140.4      | 1.5         |
| 230499_at   | —           | 3.05E-04 | 71.1       | 56.3       | 106.1      | 126.0       | 173.4       | 77.1        | 90.2        | 175.5   | 121.2   | 267.5   | 236.3    | 205.1    | 196.1    | 190.8    | 90.2          | 196.1      | 2.2         |
| 230659_at   | —           | 2.46E-03 | 3806.4     | 3334.2     | 3401.6     | 3538.2      | 3740.9      | 4217.2      | 4251.5      | 4350.2  | 4678.5  | 5488.7  | 5146.4   | 4679.2   | 5401.7   | 6132.3   | 3740.9        | 5146.4     | 1.4         |
| 230714_s_at | —           | 4.63E-03 | 157.4      | 115.7      | 107.1      | 117.6       | 121.6       | 124.4       | 116.1       | 160.1   | 166.3   | 238.2   | 148.2    | 216.6    | 194.9    | 241.3    | 117.6         | 194.9      | 1.7         |
| 230733_at   | —           | 6.19E-03 | 91.0       | 90.6       | 128.5      | 99.0        | 86.8        | 100.3       | 104.2       | 132.4   | 112.2   | 214.5   | 129.4    | 123.2    | 103.4    | 135.5    | 99.0          | 129.4      | 1.3         |
| 230741_at   | —           | 4.83E-04 | 1647.1     | 1446.8     | 1149.4     | 1231.4      | 2415.0      | 1301.8      | 1996.5      | 2703.4  | 2757.4  | 3922.9  | 2672.1   | 3362.9   | 3330.7   | 3784.4   | 1446.8        | 3330.7     | 2.3         |
| 230850_at   | —           | 2.87E-03 | 120.6      | 121.5      | 136.2      | 133.7       | 158.2       | 142.2       | 156.6       | 163.0   | 139.0   | 267.8   | 270.3    | 205.3    | 213.3    | 231.3    | 136.2         | 213.3      | 1.6         |
| 231078_at   | —           | 2.23E-04 | 63.4       | 57.2       | 81.4       | 70.9        | 68.0        | 75.6        | 82.7        | 88.9    | 169.4   | 319.2   | 135.5    | 187.6    | 187.3    | 201.4    | 70.9          | 187.3      | 2.6         |
| 231083_at   | —           | 1.16E-05 | 69.7       | 26.0       | 52.1       | 47.4        | 58.2        | 22.4        | 97.6        | 228.8   | 129.8   | 279.6   | 217.6    | 254.4    | 209.0    | 334.5    | 52.1          | 228.8      | 4.4         |
| 231127_at   | —           | 5.95E-03 | 76.2       | 85.9       | 125.1      | 121.8       | 120.3       | 122.1       | 135.0       | 115.5   | 107.7   | 150.8   | 204.3    | 159.5    | 141.4    | 161.1    | 121.8         | 150.8      | 1.2         |
| 231227_at   | —           | 5.10E-03 | 50.3       | 47.3       | 21.5       | 24.5        | 42.1        | 38.1        | 25.0        | 58.5    | 69.3    | 100.5   | 93.0     | 59.8     | 73.0     | 77.2     | 38.1          | 73.0       | 1.9         |
| 231259_s_at | —           | 5.30E-03 | 68.0       | 55.9       | 77.2       | 87.0        | 72.7        | 40.6        | 69.2        | 88.2    | 69.6    | 90.5    | 159.2    | 99.2     | 91.7     | 164.7    | 69.2          | 91.7       | 1.3         |
| 231274_s_at | —           | 2.66E-05 | 122.0      | 126.5      | 222.6      | 181.6       | 200.3       | 180.2       | 254.9       | 319.1   | 483.3   | 640.8   | 317.4    | 563.0    | 473.3    | 842.7    | 181.6         | 483.3      | 2.7         |
| 231312_at   | —           | 4.44E-03 | 162.9      | 126.8      | 209.7      | 193.4       | 208.7       | 201.1       | 200.2       | 232.9   | 197.7   | 280.7   | 303.1    | 202.9    | 322.0    | 279.1    | 200.2         | 279.1      | 1.4         |
| 231513_at   | —           | 1.71E-05 | 202.0      | 185.6      | 476.7      | 399.7       | 838.9       | 256.4       | 489.3       | 1022.9  | 2617.8  | 5372.8  | 2874.4   | 2774.8   | 2945.3   | 4266.4   | 399.7         | 2874.4     | 7.2         |
| 231699_at   | —           | 1.21E-05 | 123.0      | 98.5       | 106.3      | 93.0        | 176.0       | 79.7        | 158.3       | 317.7   | 345.5   | 474.5   | 361.7    | 542.4    | 487.0    | 508.8    | 106.3         | 474.5      | 4.5         |
| 231937_at   | —           | 2.87E-03 | 104.5      | 91.8       | 101.8      | 95.2        | 81.2        | 70.1        | 93.1        | 111.2   | 113.2   | 151.2   | 193.3    | 142.8    | 115.8    | 156.1    | 93.1          | 142.8      | 1.5         |
| 232095_at   | —           | 9.81E-04 | 138.3      | 131.3      | 165.5      | 220.5       | 194.0       | 182.4       | 218.2       | 249.6   | 185.7   | 331.7   | 288.8    | 278.1    | 238.1    | 385.4    | 182.4         | 278.1      | 1.5         |
| 232150_at   | —           | 6.53E-04 | 76.2       | 65.5       | 87.8       | 75.7        | 88.6        | 78.8        | 94.4        | 112.5   | 118.3   | 214.3   | 179.4    | 127.3    | 109.9    | 168.8    | 78.8          | 127.3      | 1.6         |
| 232333_at   | —           | 1.14E-03 | 129.9      | 93.5       | 74.0       | 74.9        | 87.6        | 83.8        | 77.6        | 155.3   | 128.0   | 192.3   | 157.5    | 178.5    | 135.6    | 174.3    | 83.8          | 157.5      | 1.9         |
| 232375_at   | —           | 2.27E-05 | 80.9       | 93.8       | 166.2      | 112.6       | 113.3       | 92.2        | 98.9        | 172.5   | 177.6   | 358.2   | 301.9    | 224.5    | 198.5    | 292.0    | 98.9          | 224.5      | 2.3         |
| 233118_at   | —           | 1.14E-03 | 29.2       | 32.8       | 28.1       | 26.7        | 32.2        | 25.0        | 30.2        | 44.2    | 46.1    | 87.3    | 106.2    | 52.2     | 76.6     | 72.3     | 29.2          | 72.3       | 2.5         |
| 233137_at   | —           | 1.15E-04 | 111.6      | 104.8      | 196.3      | 160.5       | 252.1       | 196.2       | 203.9       | 259.5   | 285.7   | 405.7   | 286.8    | 362.7    | 366.5    | 460.3    | 196.2         | 362.7      | 1.8         |
| 233289_at   | —           | 7.75E-03 | 36.7       | 32.1       | 77.3       | 55.7        | 56.2        | 43.9        | 30.1        | 64.7    | 54.4    | 124.3   | 64.4     | 57.7     | 52.8     | 46.8     | 43.9          | 57.7       | 1.3         |
| 233935_at   | —           | 6.14E-03 | 46.1       | 32.3       | 32.0       | 50.4        | 48.8        | 37.8        | 34.9        | 49.4    | 73.9    | 129.9   | 66.4     | 78.7     | 62.1     | 84.5     | 37.8          | 73.9       | 2.0         |
| 233989_at   | —           | 1.11E-04 | 115.7      | 69.6       | 152.8      | 121.1       | 126.8       | 74.6        | 123.8       | 224.6   | 316.7   | 810.1   | 266.2    | 308.5    | 273.2    | 370.6    | 121.1         | 308.5      | 2.5         |
| 234326_at   | —           | 9.94E-04 | 52.6       | 38.1       | 63.6       | 54.7        | 71.4        | 56.3        | 73.8        | 72.7    | 56.0    | 138.0   | 109.5    | 90.0     | 99.1     | 110.9    | 56.3          | 99.1       | 1.8         |
| 235094_at   | —           | 2.34E-03 | 479.2      | 282.6      | 339.5      | 495.0       | 353.5       | 245.4       | 352.0       | 503.6   | 618.9   | 1155.1  | 694.1    | 686.1    | 710.0    | 941.7    | 352.0         | 694.1      | 2.0         |
| 235102_x_at | —           | 8.93E-03 | 90.4       | 87.0       | 226.1      | 115.3       | 106.8       | 120.6       | 134.3       | 169.0   | 105.8   | 216.9   | 195.8    | 156.2    | 166.7    | 182.6    | 115.3         | 169.0      | 1.5         |
| 235112_at   | —           | 7.95E-03 | 46.8       | 40.1       | 53.5       | 49.9        | 74.8        | 74.0        | 41.9        | 65.7    | 82.8    | 142.8   | 97.7     | 71.0     | 89.4     | 114.6    | 49.9          | 89.4       | 1.8         |
| 235157_at   | —           | 1.24E-05 | 140.4      | 159.3      | 168.3      | 227.7       | 224.3       | 179.3       | 247.9       | 399.5   | 555.4   | 1004.0  | 843.0    | 599.9    | 542.7    | 844.2    | 179.3         | 599.9      | 3.3         |
| 235242_at   | —           | 1.14E-03 | 193.4      | 272.2      | 384.1      | 283.8       | 471.8       | 402.3       | 399.3       | 388.7   | 340.5   | 798.0   | 448.8    | 611.2    | 594.2    | 658.3    | 384.1         | 594.2      | 1.5         |
| 235295_at   | —           | 7.30E-04 | 68.8       | 101.3      | 111.6      | 107.6       | 133.3       | 123.0       | 202.5       | 171.4   | 163.0   | 350.5   | 234.6    | 171.6    | 227.6    | 349.1    | 111.6         | 227.6      | 2.0         |
| 235407_at   | —           | 8.51E-04 | 108.8      | 97.0       | 150.9      | 124.0       | 149.2       | 150.7       | 154.6       | 156.3   | 177.3   | 203.0   | 173.7    | 192.2    | 215.5    | 229.4    | 149.2         | 192.2      | 1.3         |
| 235454_at   | —           | 7.68E-03 | 354.4      | 365.5      | 540.6      | 483.9       | 360.6       | 344.7       | 348.3       | 460.4   | 473.0   | 671.6   | 501.5    | 466.7    | 437.2    | 501.7    | 360.6         | 473.0      | 1.3         |
| 235543_at   | —           | 3.16E-03 | 71.9       | 65.6       | 96.0       | 87.6        | 94.6        | 108.4       | 98.0        | 140.8   | 93.8    | 179.4   | 117.9    | 121.3    | 124.5    | 138.2    | 94.6          | 124.5      | 1.3         |
| 235661_at   | —           | 3.70E-04 | 90.3       | 62.0       | 54.2       | 50.4        | 49.2        | 25.2        | 49.7        | 129.6   | 132.8   | 162.3   | 204.2    | 169.9    | 163.3    | 171.4    | 50.4          | 163.3      | 3.2         |
| 235735_at   | —           | 1.03E-05 | 58.9       | 41.0       | 55.9       | 104.9       | 76.1        | 34.1        | 69.0        | 253.1   | 173.3   | 268.7   | 286.2    | 456.6    | 212.9    | 524.6    | 58.9          | 268.7      | 4.6         |
| 235740_at   | —           | 3.66E-03 | 257.1      | 191.0      | 278.8      | 341.5       | 471.8       | 278.8       | 416.0       | 453.3   | 486.2   | 903.6   | 742.5    | 483.1    | 520.8    | 552.5    | 278.8         | 520.8      | 1.9         |
| 235847_at   | —           | 7.46E-03 | 59.9       | 38.2       | 52.2       | 54.3        | 59.9        | 46.0        | 52.2        | 57.5    | 49.2    | 75.9    | 94.5     | 78.3     | 65.4     | 78.0     | 52.2          | 75.9       | 1.5         |
| 235920_at   | —           | 6.61E-03 | 58.8       | 48.1       | 53.5       | 57.9        | 48.5        | 44.2        | 45.0        | 58.0    | 58.8    | 74.8    | 80.7     | 76.4     | 85.6     | 77.3     | 48.5          | 76.4       | 1.6         |
| 235922_at   | —           | 1.13E-03 | 93.4       | 70.2       | 84.5       | 93.3        | 83.7        | 57.7        | 86.1        | 105.2   | 139.5   | 280.9   | 188.1    | 140.6    | 111.7    | 201.5    | 84.5          | 140.6      | 1.7         |
| 235971_at   | —           | 6.95E-03 | 80.4       | 132.5      | 117.0      | 100.2       | 139.1       | 116.9       | 159.1       | 129.4   | 138.5   | 223.6   | 178.9    | 165.7    | 166.7    | 196.7    | 117.0         | 166.7      | 1.4         |
| 236106_at   | —           | 2.71E-03 | 163.3      | 159.4      | 162.0      | 145.8       | 159.5       | 182.8       | 135.7       | 245.8   | 315.0   | 449.4   | 227.3    | 251.0    | 199.7    | 354.4    | 159.5         | 251.0      | 1.6         |
| 236139_at   | —           | 9.72E-03 | 69.5       | 39.8       | 65.2       | 68.8        | 71.3        | 57.0        | 55.9        | 76.4    | 51.4    | 107.9   | 118.5    | 71.9     | 80.1     | 85.3     | 65.2          | 80.1       | 1.2         |
| 236191_at   | —           | 1.01E-04 | 47.6       | 43.0       | 49.9       | 64.8        | 46.9        | 71.5        | 39.5        | 136.7   | 337.3   | 557.5   | 230.9    | 184.8    | 195.8    | 201.9    | 47.6          | 201.9      | 4.2         |
| 236198_at   | —           | 5.42E-04 | 9.0        | 11.2       | 16.8       | 15.4        | 39.1        | 12.5        | 36.8        | 53.5    | 31.2    | 119.5   | 99.1     | 82.3     | 100.2    | 60.6     | 15.4          | 82.3       | 5.4         |
| 236372_at   | —           | 4.56E-03 | 52.2       | 47.1       | 50.2       | 40.9        | 54.3        | 47.6        | 58.2        | 64.2    | 83.8    | 108.4   | 61.2     | 71.9     | 51.8     | 93.2     | 50.2          | 71.9       | 1.4         |
| 236399_at   | —           | 4.65E-03 | 36.7       | 56.9       | 58.9       | 56.9        | 38.4        | 59.1        | 71.7        | 51.3    | 68.4    | 88.6    | 67.1     | 59.5     | 67.7     | 94.4     | 56.9          | 67.7       | 1.2         |
| 236417_at   | —           | 9.31E-03 | 77.8       | 117.4      | 118.9      | 113.1       | 84.4        | 94.8        | 90.9        | 85.2    | 185.5   | 324.8   | 250.2    | 95.0     | 123.6    | 151.0    | 94.8          | 151.0      | 1.6         |
| 236437_at   | —           | 2.13E-03 | 27.3       | 55.1       | 65.4       | 65.3        | 64.5        | 91.6        | 68.0        | 69.4    | 92.8    | 206.3   | 184.0    | 102.8    | 107.3    | 102.8    | 65.3          | 102.8      | 1.6         |
| 236439_at   | —           | 3.42E-04 | 71.1       | 87.4       | 94.5       | 79.1        | 138.8       | 58.8        | 125.5       | 116.6   | 203.3   | 369.0   | 133.1    | 255.5    | 139.6    | 251.1    | 87.4          | 203.3      | 2.3         |
| 236495_at   | —           | 1.55E-04 | 98.0       | 55.9       | 139.2      | 91.7        | 156.1       | 123.3       | 170.7       |         |         |         |          |          |          |          |               |            |             |

Supplementary Table S1. Continued.

| ID          | Gene Symbol | p-value  | VW3 Saline | VW6 Saline | VW7 Saline | VW13 Saline | VW22 Saline | VW23 Saline | VW25 Saline | VW3 LPS | VW6 LPS | VW7 LPS | VW13 LPS | VW22 LPS | VW23 LPS | VW25 LPS | Median saline | Median LPS | Fold change |
|-------------|-------------|----------|------------|------------|------------|-------------|-------------|-------------|-------------|---------|---------|---------|----------|----------|----------|----------|---------------|------------|-------------|
| 237082_at   | —           | 3.33E-03 | 42.3       | 42.3       | 54.5       | 61.6        | 56.7        | 54.9        | 48.8        | 56.8    | 44.4    | 95.4    | 137.6    | 105.5    | 73.9     | 82.5     | 54.5          | 82.5       | 1.5         |
| 237091_at   | —           | 1.05E-04 | 191.0      | 118.5      | 171.7      | 174.7       | 180.7       | 145.1       | 194.9       | 278.5   | 262.5   | 444.0   | 312.0    | 390.2    | 387.5    | 375.3    | 174.7         | 375.3      | 2.1         |
| 237104_at   | —           | 7.46E-03 | 207.5      | 247.5      | 288.7      | 329.2       | 350.9       | 268.5       | 291.3       | 302.3   | 305.3   | 469.8   | 462.4    | 359.8    | 316.3    | 429.7    | 288.7         | 359.8      | 1.2         |
| 237105_at   | —           | 5.51E-03 | 85.2       | 82.8       | 133.9      | 118.9       | 109.5       | 125.5       | 122.5       | 131.6   | 104.8   | 325.9   | 201.5    | 185.4    | 126.9    | 181.0    | 118.9         | 181.0      | 1.5         |
| 237154_at   | —           | 1.54E-03 | 176.2      | 172.7      | 192.7      | 131.6       | 219.3       | 436.2       | 219.7       | 265.1   | 289.8   | 324.2   | 167.2    | 285.2    | 532.0    | 309.6    | 192.7         | 289.8      | 1.5         |
| 237310_at   | —           | 6.38E-05 | 50.1       | 44.0       | 50.1       | 47.8        | 29.6        | 66.5        | 43.8        | 78.4    | 118.8   | 166.7   | 120.0    | 106.4    | 157.1    | 110.4    | 47.8          | 118.8      | 2.5         |
| 237563_s_at | —           | 2.33E-05 | 105.5      | 86.0       | 98.1       | 103.5       | 154.3       | 102.7       | 129.0       | 273.3   | 230.8   | 311.4   | 186.3    | 331.1    | 252.5    | 275.7    | 103.5         | 273.3      | 2.6         |
| 237954_x_at | —           | 7.21E-03 | 112.5      | 113.1      | 83.7       | 93.0        | 112.5       | 85.9        | 100.7       | 143.1   | 140.8   | 112.5   | 96.9     | 152.4    | 133.3    | 126.4    | 100.7         | 133.3      | 1.3         |
| 238361_s_at | —           | 3.06E-03 | 59.7       | 44.4       | 48.5       | 44.2        | 83.5        | 35.3        | 46.2        | 82.3    | 55.5    | 95.4    | 207.9    | 144.1    | 88.6     | 116.5    | 46.2          | 95.4       | 2.1         |
| 238389_s_at | —           | 9.72E-03 | 59.1       | 55.0       | 57.6       | 46.3        | 59.5        | 48.4        | 71.2        | 65.2    | 63.6    | 104.3   | 52.5     | 84.8     | 88.9     | 98.4     | 57.6          | 84.8       | 1.5         |
| 238403_at   | —           | 6.25E-05 | 304.8      | 288.9      | 281.8      | 346.2       | 373.0       | 301.4       | 185.2       | 501.4   | 639.8   | 1005.7  | 958.2    | 1039.0   | 964.4    | 720.3    | 301.4         | 958.2      | 3.2         |
| 238405_at   | —           | 2.84E-05 | 308.9      | 271.2      | 289.7      | 375.3       | 387.9       | 343.3       | 227.7       | 554.7   | 558.6   | 878.0   | 902.5    | 809.3    | 794.8    | 665.2    | 308.9         | 794.8      | 2.6         |
| 238729_x_at | —           | 1.62E-03 | 23.0       | 28.6       | 62.1       | 63.0        | 81.6        | 65.7        | 76.1        | 57.5    | 84.8    | 327.3   | 109.5    | 116.1    | 111.5    | 150.3    | 63.0          | 111.5      | 1.8         |
| 238743_at   | —           | 2.92E-03 | 330.2      | 400.1      | 406.4      | 267.9       | 235.2       | 252.6       | 292.2       | 398.5   | 423.3   | 682.9   | 483.3    | 386.4    | 475.1    | 633.0    | 292.2         | 475.1      | 1.6         |
| 238758_at   | —           | 8.84E-03 | 169.0      | 122.5      | 194.7      | 185.6       | 193.6       | 159.6       | 184.2       | 219.1   | 160.1   | 259.4   | 195.8    | 280.2    | 219.1    | 204.9    | 184.2         | 219.1      | 1.2         |
| 238869_at   | —           | 3.67E-03 | 83.3       | 84.1       | 67.6       | 79.6        | 69.8        | 62.5        | 50.8        | 98.1    | 96.7    | 117.4   | 142.0    | 106.2    | 136.6    | 136.5    | 69.8          | 117.4      | 1.7         |
| 238942_at   | —           | 3.09E-03 | 39.9       | 50.4       | 61.9       | 59.2        | 62.3        | 63.7        | 75.2        | 51.3    | 69.7    | 182.2   | 81.2     | 99.5     | 140.5    | 117.4    | 61.9          | 99.5       | 1.6         |
| 238973_s_at | —           | 6.10E-05 | 79.6       | 71.0       | 73.2       | 68.3        | 92.7        | 80.7        | 89.5        | 156.4   | 161.6   | 211.0   | 134.3    | 152.4    | 152.1    | 174.6    | 79.6          | 156.4      | 2.0         |
| 239005_at   | —           | 6.27E-03 | 59.5       | 59.3       | 69.5       | 72.8        | 43.6        | 68.0        | 58.8        | 66.0    | 68.1    | 91.7    | 92.8     | 65.1     | 85.4     | 87.4     | 59.5          | 85.4       | 1.4         |
| 239032_at   | —           | 9.66E-03 | 37.6       | 45.0       | 48.2       | 51.0        | 52.1        | 42.9        | 50.6        | 55.7    | 69.6    | 113.5   | 118.9    | 61.1     | 50.9     | 57.3     | 48.2          | 61.1       | 1.3         |
| 239045_at   | —           | 6.51E-03 | 31.2       | 44.3       | 61.5       | 63.4        | 64.2        | 66.8        | 61.2        | 64.1    | 57.1    | 108.0   | 93.8     | 71.0     | 80.0     | 81.3     | 61.5          | 80.0       | 1.3         |
| 239060_at   | —           | 6.86E-04 | 39.6       | 33.6       | 41.8       | 39.0        | 64.2        | 46.3        | 54.3        | 60.2    | 46.2    | 118.4   | 76.8     | 105.1    | 100.5    | 86.5     | 41.8          | 86.5       | 2.1         |
| 239249_at   | —           | 2.36E-03 | 116.7      | 87.1       | 93.9       | 96.1        | 121.4       | 115.5       | 121.8       | 131.5   | 179.2   | 320.8   | 141.5    | 225.5    | 267.6    | 200.6    | 115.5         | 200.6      | 1.7         |
| 239258_at   | —           | 2.73E-03 | 43.3       | 49.8       | 74.8       | 56.3        | 65.6        | 64.3        | 64.5        | 91.0    | 71.3    | 229.0   | 148.5    | 115.8    | 85.2     | 80.0     | 64.3          | 91.0       | 1.4         |
| 239274_at   | —           | 8.86E-03 | 69.3       | 79.0       | 82.6       | 79.0        | 75.5        | 78.9        | 79.0        | 77.5    | 79.0    | 122.2   | 125.7    | 105.0    | 104.1    | 122.6    | 79.0          | 105.0      | 1.3         |
| 239277_at   | —           | 6.60E-03 | 349.4      | 363.3      | 439.7      | 468.7       | 444.3       | 540.1       | 472.8       | 513.3   | 490.7   | 631.0   | 645.9    | 485.5    | 601.4    | 595.4    | 444.3         | 595.4      | 1.3         |
| 239331_at   | —           | 2.20E-05 | 43.2       | 38.9       | 57.7       | 52.3        | 63.4        | 48.5        | 73.0        | 112.3   | 93.3    | 204.5   | 114.2    | 169.7    | 115.5    | 138.2    | 52.3          | 115.5      | 2.2         |
| 239414_at   | —           | 1.67E-04 | 41.5       | 25.4       | 42.9       | 32.5        | 48.1        | 36.2        | 47.9        | 63.3    | 75.7    | 128.1   | 84.6     | 93.9     | 85.8     | 80.6     | 41.5          | 84.6       | 2.0         |
| 239427_at   | —           | 2.69E-03 | 52.1       | 48.0       | 33.8       | 28.8        | 35.0        | 35.0        | 34.1        | 57.6    | 59.1    | 117.1   | 74.2     | 90.0     | 77.9     | 127.4    | 35.0          | 77.9       | 2.2         |
| 239451_at   | —           | 5.56E-03 | 52.3       | 44.8       | 48.9       | 64.4        | 42.5        | 52.9        | 64.8        | 74.6    | 62.1    | 94.1    | 96.8     | 54.2     | 57.3     | 80.3     | 52.3          | 74.6       | 1.4         |
| 239494_at   | —           | 3.67E-03 | 61.2       | 59.4       | 62.0       | 65.7        | 68.1        | 84.5        | 67.5        | 77.0    | 77.3    | 109.6   | 91.9     | 81.6     | 102.1    | 98.9     | 65.7          | 91.9       | 1.4         |
| 239555_at   | —           | 6.89E-04 | 51.8       | 32.5       | 45.8       | 39.3        | 58.4        | 51.5        | 42.7        | 73.6    | 48.0    | 86.5    | 98.3     | 78.7     | 88.5     | 82.7     | 45.8          | 82.7       | 1.8         |
| 239759_at   | —           | 8.54E-04 | 157.5      | 162.5      | 157.2      | 134.9       | 122.8       | 147.1       | 160.4       | 212.2   | 200.9   | 352.7   | 237.2    | 259.3    | 256.7    | 259.0    | 157.2         | 256.7      | 1.6         |
| 239779_at   | —           | 9.25E-03 | 65.8       | 40.1       | 60.0       | 62.8        | 68.0        | 59.8        | 65.5        | 69.7    | 65.1    | 72.4    | 86.7     | 74.3     | 90.1     | 103.7    | 62.8          | 74.3       | 1.2         |
| 239814_at   | —           | 4.22E-04 | 47.3       | 31.5       | 56.5       | 57.1        | 61.7        | 36.1        | 51.4        | 80.6    | 67.5    | 115.7   | 82.7     | 80.9     | 89.4     | 102.4    | 51.4          | 82.7       | 1.6         |
| 239817_at   | —           | 5.42E-03 | 84.8       | 103.7      | 105.2      | 112.7       | 134.3       | 119.6       | 137.1       | 182.3   | 102.9   | 178.6   | 178.9    | 213.3    | 148.9    | 196.6    | 112.7         | 178.9      | 1.6         |
| 239876_at   | —           | 1.58E-04 | 32.2       | 28.6       | 37.5       | 37.9        | 45.6        | 33.1        | 48.8        | 60.2    | 49.1    | 165.7   | 102.2    | 100.1    | 102.2    | 124.2    | 37.5          | 102.2      | 2.7         |
| 239979_at   | —           | 1.23E-04 | 75.6       | 97.8       | 87.1       | 56.8        | 80.9        | 46.1        | 70.9        | 138.1   | 168.8   | 316.7   | 172.2    | 157.6    | 113.5    | 207.5    | 75.6          | 168.8      | 2.2         |
| 240057_at   | —           | 7.73E-03 | 92.7       | 69.5       | 103.8      | 103.5       | 124.5       | 99.7        | 88.8        | 113.5   | 83.3    | 119.7   | 152.9    | 138.5    | 146.0    | 141.7    | 99.7          | 138.5      | 1.4         |
| 240103_at   | —           | 2.15E-04 | 73.5       | 15.2       | 23.3       | 70.0        | 236.4       | 42.5        | 68.9        | 352.6   | 315.0   | 632.5   | 248.8    | 828.1    | 591.4    | 475.3    | 68.9          | 475.3      | 6.9         |
| 240131_at   | —           | 1.90E-03 | 1119.4     | 313.2      | 443.9      | 279.2       | 1044.4      | 675.7       | 924.6       | 1510.5  | 767.7   | 893.7   | 771.6    | 1419.8   | 1612.0   | 1170.4   | 675.7         | 1170.4     | 1.7         |
| 240137_at   | —           | 2.25E-04 | 16.1       | 10.8       | 18.4       | 14.3        | 29.1        | 5.2         | 60.2        | 76.3    | 36.5    | 129.0   | 105.7    | 77.6     | 47.8     | 112.0    | 16.1          | 77.6       | 4.8         |
| 240145_at   | —           | 1.32E-04 | 50.3       | 36.3       | 76.1       | 53.3        | 70.0        | 70.7        | 84.0        | 87.8    | 58.9    | 222.1   | 113.3    | 118.0    | 157.5    | 157.0    | 70.0          | 118.0      | 1.7         |
| 240165_at   | —           | 1.71E-04 | 75.6       | 53.6       | 73.9       | 90.3        | 126.7       | 94.0        | 85.5        | 120.9   | 114.6   | 304.8   | 217.2    | 272.4    | 228.8    | 174.7    | 85.5          | 217.2      | 2.5         |
| 240232_at   | —           | 4.32E-05 | 437.2      | 593.1      | 424.4      | 497.5       | 657.7       | 509.4       | 550.8       | 1219.0  | 1618.1  | 2834.8  | 2343.0   | 1545.5   | 2223.2   | 1943.6   | 509.4         | 1943.6     | 3.8         |
| 240421_x_at | —           | 4.87E-03 | 68.8       | 67.6       | 80.3       | 84.0        | 110.0       | 67.4        | 116.3       | 97.8    | 107.8   | 251.3   | 121.9    | 125.0    | 143.7    | 174.4    | 80.3          | 125.0      | 1.6         |
| 240536_at   | —           | 9.12E-04 | 134.1      | 45.5       | 66.4       | 37.0        | 102.5       | 34.5        | 112.9       | 168.9   | 97.9    | 277.9   | 107.7    | 170.4    | 122.1    | 260.2    | 66.4          | 168.9      | 2.5         |
| 240652_at   | —           | 4.01E-03 | 110.0      | 95.6       | 142.4      | 136.9       | 140.7       | 148.5       | 137.4       | 197.2   | 143.7   | 219.0   | 237.6    | 177.4    | 163.1    | 166.0    | 137.4         | 177.4      | 1.3         |
| 240796_at   | —           | 2.37E-03 | 58.3       | 44.2       | 32.2       | 42.7        | 75.3        | 47.2        | 63.8        | 78.7    | 96.0    | 170.3   | 138.6    | 104.6    | 155.7    | 117.5    | 47.2          | 117.5      | 2.5         |
| 240843_at   | —           | 9.81E-03 | 55.8       | 40.5       | 89.6       | 90.9        | 84.3        | 70.5        | 94.4        | 74.6    | 79.3    | 153.3   | 123.7    | 97.7     | 96.0     | 96.4     | 84.3          | 96.4       | 1.1         |
| 240866_at   | —           | 1.83E-03 | 33.4       | 28.5       | 48.6       | 34.8        | 58.2        | 49.9        | 58.2        | 69.9    | 76.6    | 145.8   | 125.7    | 92.9     | 111.5    | 59.4     | 48.6          | 92.9       | 1.9         |
| 241068_at   | —           | 5.99E-03 | 65.6       | 47.4       | 127.5      | 126.5       | 176.0       | 118.4       | 186.8       | 110.0   | 104.5   | 358.7   | 237.6    | 173.6    | 200.3    | 223.0    | 126.5         | 200.3      | 1.6         |
| 241254_at   | —           | 4.73E-03 | 70.0       | 57.0       | 50.1       | 46.0        | 52.4        | 42.7        | 57.5        | 66.4    | 69.0    | 113.7   | 90.3     | 114.1    | 109.4    | 100.9    | 52.4          | 100.9      | 1.9         |
| 241279_at   | —           | 7.94E-04 | 39.8       | 36.3       | 42.2       | 26.1        | 44.1        | 46.6        | 48.9        | 55.6    | 85.8    | 153.5   | 78.5     | 116.3    | 93.3     | 67.9     | 42.2          | 85.8       | 2.0         |
| 241292_at   | —           | 3.04E-03 | 39.7       | 38.0       | 50.9       | 44.6        | 45.2        | 41.9        | 36.5        | 53.4    | 40.6    | 77.4    | 76.4     | 59.1     | 57.4     | 56.4     | 41.9          | 57.4       | 1.4         |
| 241371_at   | —           | 7.07E-04 | 161.9      | 131.4      | 151.2      | 133.4       | 119.3       | 149.8       | 204.6       | 193.5   | 279.6   | 380.5   | 209.3    | 195.8    | 264.3    | 435.8    | 149.8         | 264.3      | 1.8         |
| 241462_at   | —           | 2.53E-03 | 96.4       | 101.6      | 119.9      | 98.1        | 110.7       | 129.4       | 111.2       | 121.8   | 142.8   | 276.2   | 191.6    | 161.3    | 188.6    | 142.4    | 110.7         | 161.3      | 1.5         |
| 241540_at   | —           | 8.14E-03 | 74.0       | 62.7       | 66.4       | 68.6        | 51.9        | 64.8        | 80.6        | 77.7    | 83.2    | 113.7   | 74.5     | 99.9     | 98.6     | 118.3    | 66.4          | 98.6       | 1.5         |
| 241615_x_at | —           | 4.68E-03 | 733.9      | 431.0      | 555.6      | 767.5       | 828.0       | 579.9       | 792.7       | 743.5   | 889.6   | 1696.1  | 1099.9   | 1434.8   | 917.2    | 1286.3   | 733.9         | 1099.9     | 1.5         |
| 241616_at   | —           | 1.55E-03 | 410.7      | 152.0      | 354.4      | 444.2       | 571.0       | 354.5       | 409.0       | 462.2   | 441.3   | 1350.1  | 799.9    | 1166.3   | 691.8    | 775.8    | 409.0         | 775.8      | 1.9         |
| 241631_at   | —           | 9.29E-03 | 86.6       | 78.7       | 42.5       | 62.7        | 109.2       | 47.0        | 77.5        | 116.0   | 116.3   | 153.4   | 163.1    | 130.0    | 59.4     | 128.5    | 77.5          | 128.5      | 1.7         |
| 241769_at   | —           | 6.70E-03 | 28.7       | 47.9       | 40.7       | 38.3        |             |             |             |         |         |         |          |          |          |          |               |            |             |

TRANSCRIPTION PROFILES IN ALVEOLAR MACROPHAGES

Supplementary Table S1. Continued.

| ID          | Gene Symbol | p-value  | VW3_Saline | VW6_Saline | VW7_Saline | VW13_Saline | VW22_Saline | VW23_Saline | VW25_Saline | VW3_LPS | VW6_LPS | VW7_LPS | VW13_LPS | VW22_LPS | VW23_LPS | VW25_LPS | Median_saline | Median_LPS | Fold change |
|-------------|-------------|----------|------------|------------|------------|-------------|-------------|-------------|-------------|---------|---------|---------|----------|----------|----------|----------|---------------|------------|-------------|
| 242277_at   | —           | 4.19E-03 | 1538.9     | 1981.2     | 1913.1     | 1806.2      | 2004.3      | 1997.0      | 1923.5      | 2241.4  | 2614.1  | 3125.7  | 2894.6   | 2262.8   | 2259.5   | 2654.4   | 1923.5        | 2614.1     | 1.4         |
| 242379_at   | —           | 4.59E-03 | 101.2      | 74.6       | 135.0      | 105.5       | 128.9       | 103.4       | 131.6       | 143.4   | 108.2   | 310.8   | 260.4    | 142.1    | 133.6    | 230.3    | 105.5         | 143.4      | 1.4         |
| 242388_x_at | —           | 1.35E-04 | 36.1       | 27.3       | 53.4       | 54.9        | 72.2        | 50.4        | 63.0        | 119.2   | 87.3    | 280.1   | 161.0    | 113.7    | 124.6    | 162.2    | 53.4          | 124.6      | 2.3         |
| 242405_at   | —           | 6.64E-05 | 64.5       | 64.3       | 63.8       | 56.3        | 63.2        | 68.4        | 60.5        | 122.6   | 95.0    | 149.5   | 141.0    | 158.5    | 132.5    | 141.4    | 63.8          | 141.0      | 2.2         |
| 242471_at   | —           | 5.79E-03 | 41.0       | 36.3       | 42.5       | 52.7        | 47.3        | 43.4        | 42.6        | 63.5    | 53.2    | 71.5    | 89.0     | 74.9     | 41.2     | 52.0     | 42.6          | 63.5       | 1.5         |
| 242575_at   | —           | 1.86E-03 | 303.5      | 256.6      | 301.0      | 275.8       | 304.4       | 300.7       | 286.2       | 382.0   | 415.1   | 489.6   | 356.7    | 362.1    | 433.5    | 398.2    | 300.7         | 398.2      | 1.3         |
| 242713_at   | —           | 4.83E-03 | 52.1       | 48.8       | 65.1       | 67.2        | 68.8        | 63.0        | 71.7        | 68.6    | 66.3    | 153.8   | 113.7    | 86.3     | 89.7     | 87.9     | 65.1          | 87.9       | 1.3         |
| 242784_at   | —           | 2.77E-04 | 220.5      | 223.4      | 335.0      | 242.2       | 153.2       | 173.3       | 236.5       | 284.7   | 547.4   | 1066.0  | 446.1    | 463.5    | 389.5    | 636.7    | 223.4         | 463.5      | 2.1         |
| 242827_x_at | —           | 3.15E-03 | 42.2       | 52.5       | 53.2       | 70.0        | 59.4        | 50.4        | 46.9        | 65.4    | 51.7    | 75.8    | 143.5    | 94.1     | 77.3     | 85.5     | 52.5          | 77.3       | 1.5         |
| 242853_at   | —           | 1.26E-03 | 85.3       | 58.3       | 68.7       | 102.7       | 84.3        | 91.4        | 88.3        | 114.7   | 87.0    | 241.1   | 165.3    | 187.8    | 164.5    | 196.9    | 85.3          | 165.3      | 1.9         |
| 242866_x_at | —           | 5.51E-05 | 121.3      | 93.6       | 77.5       | 86.2        | 86.8        | 70.2        | 95.1        | 229.2   | 165.0   | 183.6   | 233.7    | 233.7    | 195.8    | 346.4    | 86.8          | 229.2      | 2.6         |
| 242875_at   | —           | 2.76E-03 | 138.7      | 113.3      | 130.6      | 151.0       | 164.5       | 151.7       | 148.0       | 165.5   | 124.9   | 210.0   | 210.6    | 262.6    | 230.4    | 214.0    | 148.0         | 210.6      | 1.4         |
| 242898_at   | —           | 3.54E-03 | 253.1      | 292.4      | 283.4      | 238.9       | 245.9       | 250.4       | 267.4       | 372.3   | 295.5   | 455.1   | 424.9    | 395.1    | 312.6    | 482.2    | 253.1         | 395.1      | 1.6         |
| 242907_at   | —           | 6.10E-05 | 34.2       | 52.5       | 56.4       | 67.0        | 75.6        | 60.1        | 65.0        | 109.1   | 128.2   | 340.1   | 231.0    | 171.5    | 147.5    | 193.2    | 60.1          | 171.5      | 2.9         |
| 243015_at   | —           | 7.49E-03 | 35.5       | 47.2       | 29.6       | 21.6        | 33.6        | 30.8        | 34.7        | 28.4    | 79.2    | 129.8   | 52.9     | 59.0     | 61.8     | 99.5     | 33.6          | 61.8       | 1.8         |
| 243157_at   | —           | 5.32E-03 | 381.5      | 310.7      | 359.9      | 241.5       | 294.1       | 244.0       | 324.9       | 385.9   | 367.2   | 542.9   | 353.8    | 476.5    | 349.7    | 463.1    | 310.7         | 385.9      | 1.2         |
| 243158_at   | —           | 4.92E-03 | 25.0       | 40.6       | 50.6       | 42.8        | 48.2        | 53.0        | 57.2        | 52.2    | 50.7    | 95.8    | 80.7     | 67.8     | 64.5     | 64.8     | 48.2          | 64.8       | 1.3         |
| 243187_at   | —           | 9.65E-03 | 94.0       | 97.0       | 67.3       | 61.9        | 77.5        | 66.8        | 61.4        | 93.8    | 97.2    | 137.2   | 96.0     | 134.2    | 116.1    | 139.9    | 67.3          | 116.1      | 1.7         |
| 243271_at   | —           | 1.25E-04 | 403.8      | 419.9      | 417.2      | 326.2       | 314.0       | 260.7       | 252.0       | 610.2   | 861.9   | 1210.8  | 912.5    | 581.9    | 667.6    | 811.4    | 326.2         | 811.4      | 2.5         |
| 243286_at   | —           | 7.35E-03 | 46.6       | 52.7       | 93.7       | 76.8        | 97.1        | 71.1        | 95.1        | 79.7    | 85.0    | 170.4   | 126.7    | 97.0     | 92.8     | 107.9    | 76.8          | 97.0       | 1.3         |
| 243342_at   | —           | 8.48E-03 | 63.4       | 50.5       | 56.9       | 64.4        | 62.9        | 46.2        | 49.6        | 87.1    | 63.6    | 96.2    | 123.1    | 69.1     | 84.3     | 53.4     | 56.9          | 84.3       | 1.5         |
| 243395_at   | —           | 3.08E-03 | 69.3       | 75.7       | 94.7       | 82.5        | 86.3        | 62.5        | 62.8        | 91.8    | 86.3    | 236.1   | 121.4    | 129.3    | 106.7    | 101.9    | 75.7          | 106.7      | 1.4         |
| 243410_at   | —           | 1.36E-03 | 28.8       | 49.1       | 52.5       | 33.7        | 50.4        | 39.0        | 53.0        | 48.5    | 54.1    | 86.4    | 79.9     | 78.9     | 66.8     | 84.8     | 49.1          | 78.9       | 1.6         |
| 243454_at   | —           | 7.40E-03 | 47.3       | 41.2       | 49.7       | 32.4        | 40.6        | 40.6        | 39.6        | 60.7    | 40.9    | 78.2    | 86.8     | 71.2     | 68.0     | 56.2     | 40.6          | 68.0       | 1.7         |
| 243633_at   | —           | 1.83E-03 | 145.5      | 112.9      | 119.1      | 114.8       | 122.3       | 101.5       | 110.5       | 161.6   | 163.0   | 228.5   | 164.2    | 178.1    | 194.6    | 230.8    | 114.8         | 178.1      | 1.6         |
| 243653_at   | —           | 5.92E-03 | 99.1       | 61.5       | 101.0      | 76.9        | 177.1       | 89.2        | 112.7       | 134.3   | 126.3   | 175.9   | 219.1    | 225.4    | 209.6    | 116.2    | 99.1          | 175.9      | 1.8         |
| 243675_at   | —           | 1.45E-03 | 31.1       | 21.3       | 55.8       | 45.4        | 57.2        | 30.2        | 85.3        | 62.2    | 83.2    | 174.3   | 66.4     | 121.9    | 87.6     | 104.0    | 45.4          | 87.6       | 1.9         |
| 243699_at   | —           | 1.80E-03 | 104.1      | 109.4      | 118.0      | 89.5        | 90.2        | 127.1       | 102.5       | 150.7   | 191.9   | 488.6   | 151.5    | 162.0    | 195.6    | 220.2    | 104.1         | 191.9      | 1.8         |
| 243754_at   | —           | 3.68E-03 | 180.5      | 151.3      | 163.8      | 139.5       | 190.7       | 142.5       | 150.6       | 326.7   | 165.6   | 231.4   | 214.8    | 239.7    | 225.3    | 191.2    | 151.3         | 225.3      | 1.5         |
| 243888_at   | —           | 1.40E-03 | 65.0       | 83.2       | 144.0      | 109.3       | 120.0       | 108.9       | 131.9       | 139.7   | 137.2   | 373.7   | 273.2    | 173.2    | 125.9    | 231.1    | 109.3         | 173.2      | 1.6         |
| 243931_at   | —           | 1.73E-04 | 101.7      | 83.1       | 125.9      | 180.6       | 161.2       | 126.7       | 212.1       | 247.8   | 169.8   | 367.3   | 312.2    | 261.0    | 223.4    | 362.3    | 126.7         | 261.0      | 2.1         |
| 244035_at   | —           | 6.71E-04 | 61.2       | 64.8       | 72.5       | 57.6        | 57.4        | 52.1        | 75.1        | 92.2    | 74.0    | 119.8   | 94.4     | 87.0     | 80.0     | 118.0    | 61.2          | 92.2       | 1.5         |
| 244054_at   | —           | 3.79E-03 | 54.8       | 58.6       | 67.8       | 77.4        | 77.5        | 71.4        | 73.8        | 75.5    | 66.6    | 89.4    | 93.8     | 102.5    | 106.1    | 93.2     | 71.4          | 93.2       | 1.3         |
| 244087_at   | —           | 9.56E-04 | 85.1       | 61.9       | 57.7       | 49.2        | 77.6        | 50.5        | 68.9        | 118.5   | 86.1    | 128.7   | 151.8    | 118.2    | 110.1    | 165.0    | 61.9          | 118.5      | 1.9         |
| 244218_at   | —           | 8.67E-03 | 71.7       | 53.3       | 80.0       | 82.4        | 81.6        | 81.3        | 73.5        | 84.1    | 61.0    | 99.5    | 131.7    | 122.3    | 93.8     | 93.3     | 80.0          | 93.8       | 1.2         |
| 244219_at   | —           | 2.94E-04 | 52.2       | 53.4       | 85.0       | 76.2        | 74.6        | 70.4        | 86.0        | 76.2    | 132.3   | 246.3   | 152.4    | 126.6    | 111.7    | 181.8    | 74.6          | 132.3      | 1.8         |
| 244335_at   | —           | 1.28E-03 | 196.1      | 308.8      | 625.6      | 453.4       | 529.4       | 503.4       | 554.3       | 408.9   | 532.7   | 972.0   | 617.3    | 637.4    | 807.6    | 769.0    | 503.4         | 637.4      | 1.3         |
| 244414_at   | —           | 2.36E-04 | 40.7       | 58.8       | 60.2       | 43.7        | 56.3        | 52.8        | 53.2        | 81.7    | 92.4    | 133.8   | 133.8    | 104.4    | 83.4     | 96.9     | 53.2          | 96.9       | 1.8         |
| 244415_at   | —           | 6.53E-03 | 89.5       | 89.9       | 77.8       | 97.1        | 127.7       | 114.7       | 122.1       | 137.0   | 108.8   | 187.0   | 161.3    | 133.1    | 164.5    | 188.2    | 97.1          | 161.3      | 1.7         |
| 244447_at   | —           | 2.85E-03 | 110.3      | 129.4      | 218.5      | 213.2       | 152.9       | 167.4       | 167.0       | 218.2   | 167.8   | 378.7   | 310.2    | 241.8    | 175.6    | 261.1    | 167.0         | 241.8      | 1.4         |
| 244456_at   | —           | 3.77E-03 | 33.0       | 41.6       | 50.1       | 40.4        | 50.9        | 47.2        | 49.6        | 51.3    | 54.0    | 87.9    | 93.7     | 67.6     | 86.3     | 54.3     | 47.2          | 67.6       | 1.4         |
| 244583_at   | —           | 7.62E-05 | 133.0      | 92.8       | 152.4      | 156.8       | 195.1       | 139.3       | 190.7       | 245.9   | 208.6   | 441.8   | 339.3    | 294.2    | 355.3    | 420.0    | 152.4         | 339.3      | 2.2         |
| 244598_at   | —           | 8.02E-03 | 224.0      | 168.3      | 268.7      | 292.5       | 280.9       | 245.9       | 302.0       | 378.4   | 218.0   | 380.7   | 314.3    | 383.4    | 290.3    | 368.8    | 268.7         | 368.8      | 1.4         |
| 244765_at   | —           | 7.20E-03 | 253.9      | 209.2      | 304.3      | 294.7       | 351.3       | 329.1       | 274.9       | 302.1   | 445.8   | 639.2   | 347.4    | 389.2    | 532.5    | 425.1    | 294.7         | 425.1      | 1.4         |
| 244781_x_at | —           | 9.08E-04 | 70.8       | 59.2       | 62.8       | 68.1        | 79.9        | 63.2        | 81.4        | 86.1    | 141.4   | 188.8   | 126.1    | 132.1    | 112.0    | 144.0    | 68.1          | 132.1      | 1.9         |
| 244796_at   | —           | 2.24E-04 | 146.8      | 98.9       | 132.2      | 121.5       | 147.2       | 116.2       | 127.4       | 208.5   | 149.9   | 292.5   | 280.1    | 259.7    | 203.7    | 293.3    | 127.4         | 259.7      | 2.0         |
| 244874_at   | —           | 8.16E-03 | 47.5       | 43.7       | 36.0       | 43.9        | 40.5        | 36.5        | 36.3        | 47.7    | 57.1    | 98.1    | 66.2     | 101.8    | 51.7     | 116.1    | 40.5          | 66.2       | 1.6         |

Supplementary Table S2.

| ID           | Gene Symbol        | p-value  | VW3_Saline | VW6_Saline | VW7_Saline | VW13_Saline | VW22_Saline | VW23_Saline | VW25_Saline | VW3_LPS | VW6_LPS | VW7_LPS | VW13_LPS | VW22_LPS | VW23_LPS | VW25_LPS | Median_saline | Median_LPS | Fold change |
|--------------|--------------------|----------|------------|------------|------------|-------------|-------------|-------------|-------------|---------|---------|---------|----------|----------|----------|----------|---------------|------------|-------------|
| 225522_at    | AAK1               | 1.75E-03 | 1638.0     | 2460.7     | 2142.3     | 2110.2      | 2247.5      | 3623.5      | 2356.5      | 1516.6  | 1520.2  | 1063.0  | 1562.6   | 1158.2   | 1536.7   | 1108.8   | 2247.5        | 1516.6     | 0.7         |
| 230024_at    | AARS2              | 6.64E-03 | 564.0      | 737.4      | 723.3      | 616.3       | 644.5       | 829.4       | 678.9       | 540.9   | 498.7   | 398.9   | 509.0    | 493.3    | 629.1    | 459.3    | 678.9         | 498.7      | 0.7         |
| 206527_at    | ABAT               | 5.37E-03 | 188.1      | 193.7      | 260.5      | 213.8       | 243.2       | 232.1       | 217.6       | 184.3   | 124.5   | 108.7   | 157.8    | 171.7    | 151.3    | 97.9     | 217.6         | 151.3      | 0.7         |
| 209460_at    | ABAT               | 6.43E-03 | 191.1      | 203.7      | 311.5      | 269.9       | 295.1       | 299.6       | 199.0       | 229.0   | 94.4    | 58.7    | 141.8    | 164.3    | 127.4    | 55.8     | 269.9         | 127.4      | 0.5         |
| 209459_s_at  | ABAT               | 8.76E-03 | 122.0      | 145.2      | 230.1      | 163.1       | 262.0       | 231.7       | 167.9       | 172.1   | 50.5    | 52.2    | 123.4    | 105.5    | 72.7     | 38.2     | 167.9         | 72.7       | 0.4         |
| 242553_at    | ABCC3              | 7.24E-03 | 305.7      | 156.9      | 169.6      | 213.7       | 184.2       | 179.9       | 183.1       | 164.9   | 124.0   | 121.3   | 168.8    | 164.2    | 154.5    | 108.5    | 183.1         | 154.5      | 0.8         |
| 208161_s_at  | ABCC3              | 5.10E-03 | 1042.3     | 1143.7     | 993.2      | 1061.7      | 1669.6      | 953.0       | 746.8       | 937.7   | 663.2   | 484.4   | 868.4    | 1326.3   | 689.6    | 407.5    | 1042.3        | 689.6      | 0.7         |
| 226363_at    | ABCC5              | 1.86E-03 | 363.5      | 554.0      | 461.1      | 531.7       | 348.9       | 402.4       | 314.8       | 266.6   | 312.0   | 134.8   | 287.5    | 287.7    | 154.6    | 136.3    | 402.4         | 266.6      | 0.7         |
| 209380_s_at  | ABCC5              | 1.87E-03 | 153.9      | 189.1      | 215.3      | 194.5       | 175.8       | 154.5       | 149.6       | 121.0   | 108.1   | 74.6    | 134.5    | 121.4    | 89.9     | 59.4     | 175.8         | 108.1      | 0.6         |
| 204567_s_at  | ABCG1              | 3.78E-03 | 3828.4     | 4212.3     | 4981.8     | 4094.4      | 4035.9      | 4617.0      | 5468.6      | 3275.6  | 2811.2  | 1748.7  | 3342.5   | 2167.3   | 2688.0   | 2132.4   | 4212.3        | 2688.0     | 0.6         |
| 211113_s_at  | ABCG1              | 6.70E-03 | 1286.8     | 1415.1     | 1554.0     | 1190.7      | 1048.8      | 1139.3      | 1443.5      | 1062.6  | 684.4   | 413.0   | 789.5    | 800.7    | 843.4    | 538.0    | 1286.8        | 789.5      | 0.6         |
| 218633_x_at  | ABHD10             | 2.44E-03 | 1098.4     | 1421.5     | 1344.5     | 1427.7      | 1213.6      | 1585.5      | 1216.4      | 948.4   | 788.9   | 346.9   | 946.7    | 703.5    | 708.3    | 510.0    | 1344.5        | 708.3      | 0.5         |
| 228123_s_at  | ABHD12             | 5.90E-03 | 169.3      | 146.9      | 214.1      | 168.0       | 178.2       | 167.8       | 167.1       | 137.8   | 77.9    | 130.3   | 122.0    | 162.2    | 123.2    | 134.4    | 168.0         | 130.3      | 0.8         |
| 210006_at    | ABHD14A            | 4.65E-03 | 117.8      | 118.7      | 153.3      | 148.1       | 100.7       | 132.2       | 113.0       | 102.6   | 87.5    | 83.5    | 96.4     | 90.0     | 95.9     | 78.1     | 118.7         | 90.0       | 0.8         |
| 226796_at    | ABHD15             | 9.48E-03 | 372.5      | 444.8      | 439.9      | 469.6       | 412.1       | 499.8       | 361.8       | 423.8   | 215.1   | 176.5   | 323.9    | 319.4    | 321.8    | 169.8    | 439.9         | 319.4      | 0.7         |
| 221815_at    | ABHD2              | 6.08E-03 | 909.5      | 1559.0     | 1651.5     | 1769.1      | 1323.3      | 2041.1      | 1870.1      | 925.9   | 890.1   | 527.9   | 1121.3   | 994.9    | 1133.8   | 720.7    | 1651.5        | 925.9      | 0.6         |
| 228490_at    | ABHD2              | 4.77E-03 | 542.7      | 950.6      | 1181.0     | 1267.4      | 880.3       | 1418.3      | 1321.7      | 544.0   | 666.9   | 463.7   | 867.5    | 595.7    | 713.7    | 572.4    | 1181.0        | 595.7      | 0.5         |
| 225337_at    | ABHD2              | 7.92E-04 | 1232.6     | 1837.6     | 2387.1     | 2549.5      | 1730.7      | 2458.9      | 2536.4      | 969.8   | 1235.2  | 896.4   | 1567.8   | 997.0    | 1278.2   | 1110.1   | 2387.1        | 1110.1     | 0.5         |
| 87100_at     | ABHD2              | 4.18E-03 | 586.7      | 969.9      | 1233.6     | 1256.5      | 898.2       | 1392.0      | 1308.6      | 599.8   | 562.7   | 371.5   | 814.2    | 546.7    | 602.5    | 444.6    | 1233.6        | 562.7      | 0.5         |
| 63825_at     | ABHD2              | 5.84E-03 | 284.6      | 548.7      | 766.9      | 803.9       | 601.2       | 855.0       | 838.3       | 316.5   | 347.6   | 327.6   | 534.6    | 366.3    | 419.2    | 285.0    | 766.9         | 347.6      | 0.5         |
| 218739_at    | ABHD5              | 4.26E-04 | 1966.8     | 2711.3     | 2714.4     | 2084.6      | 2344.0      | 2809.5      | 1518.8      | 1484.6  | 1453.8  | 879.3   | 1182.1   | 1250.5   | 1200.3   | 819.2    | 2344.0        | 1200.3     | 0.5         |
| 213935_at    | ABHD5              | 2.35E-03 | 218.5      | 318.9      | 387.0      | 360.0       | 366.8       | 448.6       | 311.2       | 209.1   | 198.8   | 124.9   | 200.2    | 163.4    | 114.2    | 114.7    | 360.0         | 163.4      | 0.5         |
| 213805_at    | ABHD5              | 2.09E-03 | 180.7      | 279.2      | 443.3      | 363.0       | 311.8       | 522.0       | 327.0       | 161.6   | 156.2   | 143.6   | 223.3    | 144.6    | 135.2    | 87.1     | 327.0         | 144.6      | 0.4         |
| 221552_at    | ABHD6              | 8.23E-04 | 224.5      | 228.7      | 208.1      | 253.9       | 231.3       | 262.0       | 190.9       | 187.7   | 126.1   | 85.4    | 145.6    | 162.0    | 152.1    | 97.6     | 228.7         | 145.6      | 0.6         |
| 45288_at     | ABHD6              | 4.09E-03 | 223.4      | 249.7      | 368.1      | 375.6       | 356.1       | 413.1       | 314.5       | 232.1   | 147.4   | 96.9    | 207.5    | 203.2    | 201.4    | 148.2    | 356.1         | 201.4      | 0.6         |
| 223615_at    | ABI3               | 7.90E-03 | 189.2      | 131.9      | 177.3      | 140.8       | 139.7       | 168.9       | 126.0       | 135.3   | 94.3    | 84.2    | 94.9     | 149.0    | 123.2    | 76.4     | 140.8         | 94.9       | 0.7         |
| 214274_s_at  | ACAA1              | 9.34E-03 | 1066.3     | 1106.8     | 1266.1     | 1216.5      | 1105.9      | 1147.8      | 1058.9      | 939.2   | 878.5   | 848.3   | 957.4    | 978.1    | 990.1    | 722.5    | 1106.8        | 939.2      | 0.8         |
| 202003_at    | ACAA2              | 1.83E-03 | 3844.7     | 4298.8     | 3831.9     | 4402.1      | 4243.2      | 3928.6      | 3572.6      | 3134.4  | 3283.3  | 2368.1  | 3560.3   | 3097.5   | 2912.5   | 2333.7   | 3928.6        | 3097.5     | 0.8         |
| 1552616_a_at | ACACB              | 5.33E-03 | 62.4       | 83.6       | 87.7       | 87.2        | 89.1        | 146.8       | 83.6        | 63.4    | 54.4    | 63.4    | 59.4     | 70.3     | 104.7    | 56.9     | 87.2          | 63.4       | 0.7         |
| 221928_at    | ACACB              | 1.00E-03 | 471.5      | 544.5      | 656.0      | 500.2       | 530.6       | 1224.8      | 610.6       | 359.2   | 315.4   | 178.6   | 331.6    | 215.2    | 527.0    | 219.0    | 544.5         | 315.4      | 0.6         |
| 49452_at     | ACACB              | 1.24E-03 | 2358.5     | 3211.7     | 3551.5     | 2959.4      | 2762.9      | 6463.0      | 2850.9      | 1713.8  | 1818.1  | 602.7   | 1526.8   | 1062.6   | 2430.5   | 872.5    | 2959.4        | 1526.8     | 0.5         |
| 43427_at     | ACACB              | 9.77E-04 | 1586.0     | 2070.4     | 2319.1     | 2023.0      | 1783.4      | 4284.9      | 1852.1      | 1150.5  | 1164.9  | 421.1   | 1000.7   | 700.6    | 1597.2   | 574.8    | 2023.0        | 1000.7     | 0.5         |
| 1552472_a_at | ACAP2              | 8.43E-03 | 486.1      | 474.3      | 832.7      | 775.1       | 765.0       | 925.1       | 724.7       | 439.2   | 450.1   | 591.2   | 621.5    | 458.5    | 514.6    | 469.2    | 765.0         | 469.2      | 0.6         |
| 205412_at    | ACAT1              | 8.72E-03 | 1034.9     | 1203.2     | 1097.2     | 1070.5      | 975.2       | 996.0       | 1001.6      | 886.1   | 1004.7  | 822.8   | 982.5    | 714.2    | 806.5    | 757.7    | 1034.9        | 822.8      | 0.8         |
| 225317_at    | ACBD6              | 9.10E-03 | 449.2      | 470.9      | 508.0      | 513.0       | 485.9       | 462.4       | 471.3       | 386.9   | 335.4   | 385.7   | 443.8    | 439.9    | 371.8    | 338.6    | 471.3         | 385.7      | 0.8         |
| 228264_at    | ACCS               | 4.36E-03 | 346.9      | 829.1      | 340.3      | 771.9       | 343.0       | 392.2       | 256.8       | 304.6   | 429.2   | 174.5   | 457.0    | 245.9    | 274.3    | 228.8    | 346.9         | 274.3      | 0.8         |
| 227463_at    | ACE                | 3.66E-03 | 213.3      | 165.2      | 215.7      | 250.8       | 190.9       | 207.3       | 156.4       | 214.0   | 104.0   | 100.0   | 150.2    | 142.3    | 126.0    | 103.4    | 207.3         | 126.0      | 0.6         |
| 231321_s_at  | ACER3              | 4.09E-03 | 371.2      | 370.2      | 387.3      | 370.9       | 362.6       | 369.1       | 372.9       | 340.8   | 233.5   | 231.2   | 336.7    | 190.9    | 244.0    | 196.8    | 370.9         | 233.5      | 0.6         |
| 222688_at    | ACER3              | 4.80E-03 | 971.1      | 1439.5     | 1182.7     | 1185.8      | 1144.4      | 1447.0      | 1293.8      | 988.5   | 1030.0  | 712.9   | 944.9    | 589.8    | 746.2    | 650.8    | 1185.8        | 746.2      | 0.6         |
| 222687_s_at  | ACER3              | 3.51E-03 | 1010.3     | 1192.7     | 874.3      | 862.1       | 942.8       | 1046.1      | 912.9       | 1017.4  | 748.5   | 470.4   | 703.5    | 491.2    | 579.0    | 482.4    | 942.8         | 579.0      | 0.6         |
| 227776_at    | ACER3              | 3.14E-03 | 342.0      | 416.3      | 457.6      | 430.5       | 465.9       | 477.6       | 540.2       | 310.9   | 288.7   | 181.5   | 311.9    | 153.0    | 207.3    | 180.6    | 457.6         | 207.3      | 0.5         |
| 202982_s_at  | ACOT1 ///<br>ACOT2 | 6.25E-03 | 958.6      | 871.1      | 621.9      | 1174.2      | 902.1       | 1103.9      | 754.7       | 880.6   | 636.9   | 455.1   | 826.1    | 730.5    | 957.9    | 559.4    | 902.1         | 730.5      | 0.8         |
| 208002_s_at  | ACOT7              | 3.45E-04 | 1537.6     | 1094.1     | 1053.3     | 1320.4      | 1309.2      | 1150.0      | 828.9       | 1140.2  | 533.6   | 477.5   | 695.1    | 858.4    | 789.0    | 413.6    | 1150.0        | 695.1      | 0.6         |
| 204638_at    | ACP5               | 1.86E-03 | 1916.9     | 1979.4     | 2007.6     | 1789.0      | 1745.0      | 1568.2      | 1724.7      | 1610.7  | 1101.6  | 982.1   | 960.8    | 1486.7   | 1054.1   | 883.6    | 1789.0        | 1054.1     | 0.6         |
| 218795_at    | ACP6               | 5.19E-03 | 215.7      | 337.5      | 376.1      | 303.9       | 371.1       | 447.6       | 272.1       | 242.5   | 183.4   | 160.8   | 213.9    | 230.0    | 239.4    | 107.5    | 337.5         | 213.9      | 0.6         |
| 224882_at    | ACSS1              | 1.27E-03 | 249.0      | 282.9      | 370.9      | 324.1       | 263.4       | 307.1       | 269.3       | 239.3   | 143.7   | 104.4   | 157.3    | 136.0    | 118.4    | 108.8    | 282.9         | 136.0      | 0.5         |
| 234312_s_at  | ACSS2              | 2.46E-03 | 437.3      | 507.8      | 442.1      | 424.9       | 358.5       | 390.5       | 331.4       | 401.2   | 242.6   | 214.7   | 302.5    | 256.9    | 249.3    | 209.4    | 424.9         | 249.3      | 0.6         |
| 236126_at    | ACVRL2B            | 5.51E-03 | 133.2      | 147.7      | 174.0      | 190.6       | 182.8       | 178.8       | 156.5       | 136.6   | 104.3   | 117.1   | 116.2    | 134.5    | 138.0    | 105.5    | 174.0         | 117.1      | 0.7         |
| 226950_at    | ACVRL1             | 4.31E-03 | 2392.8     | 2550.1     | 2122.0     | 2268.9      | 2074.9      | 2894.7      | 2919.5      | 2007.0  | 1869.5  | 876.5   | 1771.4   | 1247.1   | 2217.2   | 1620.2   | 2392.8        | 1771.4     | 0.7         |
| 205260_s_at  | ACYP1              | 3.58E-04 | 265.5      | 298.8      | 274.7      | 354.2       | 247.8       | 283.3       | 239.3       | 216.6   | 196.5   | 157.4   | 177.1    | 154.4    | 156.3    | 125.6    | 274.7         | 157.4      | 0.6         |
| 222486_s_at  | ADAMTS1            | 6.89E-03 | 208.2      | 98.0       | 108.4      | 118.3       | 230.0       | 625.7       | 299.1       | 244.2   | 50.7    | 24.2    | 60.6     | 114.1    | 138.2    | 39.8     | 208.2         | 60.6       | 0.3         |
| 222162_s_at  | ADAMTS1            | 5.95E-03 | 195.9      | 60.2       | 82.1       | 82.1        | 200.2       | 626.6       | 242.4       | 192.5   | 26.9    | 18.0    | 52.9     | 103.0    | 125.8    | 30.3     | 195.9         | 52.9       | 0.3         |
| 220578_at    | ADAMTSL4           | 1.80E-03 | 399.2      | 418.3      | 503.4      | 505.7       | 323.3       | 481.0       | 293.1       | 322.7   | 299.0   | 245.1   | 318.9    | 241.8    | 293.6    | 223.9    | 418.3         | 293.6      | 0.7         |
| 226071_at    | ADAMTSL4           | 1.90E-03 | 3238.5     | 3673.8     | 3864.7     | 4053.3      | 3280.9      | 3987.2      | 2887.3      | 2922.0  | 2861.7  | 2084.0  | 2891.4   | 1785.9   | 2390.3   | 1692.3   | 3673.8        | 2390.3     | 0.7         |
| 204497_at    | ADCY9              | 5.80E-03 | 127.0      | 157.0      | 140.7      | 167.2       | 158.5       | 175.6       | 130.2       | 155.2   | 81.5    | 74.2    | 111.4    | 92.1     | 97.0     | 68.5     | 157.0         | 92.1       | 0.6         |
| 205882_x_at  | ADD3               | 4.18E-03 | 220.1      | 308.6      | 420.4      | 358.1       | 487.5       | 475.4       | 342.9       | 218.6   | 201.4   | 188.9   | 294.5    | 283.9    | 236.1    | 168.3    | 358.1         | 218.6      | 0.6         |
| 201034_at    | ADD3               | 2.29E-03 | 865.2      | 1086.8     | 1627.9     | 1338.8      | 1438.7      | 1582.7      | 1220.2      | 757.5   | 754.8   | 557.0   | 896.8    | 827.4    | 652.5    | 556.3    | 1338.8        | 754.8      | 0.6         |
| 201752_s_at  | ADD3               | 6.32E-03 | 246.9      | 342.0      | 482.7      | 446.5       | 493.6       | 520.3       | 384.3       | 291.3   | 215.5   | 195.8   |          |          |          |          |               |            |             |



TRANSCRIPTION PROFILES IN ALVEOLAR MACROPHAGES

Supplementary Table S2. Continued.

| ID           | Gene Symbol                                   | p-value  | VW3_Saline | VW6_Saline | VW7_Saline | VW13_Saline | VW22_Saline | VW23_Saline | VW25_Saline | VW3_LPS | VW6_LPS | VW7_LPS | VW13_LPS | VW22_LPS | VW23_LPS | VW25_LPS | Median_saline | Median_LPS | Fold change |
|--------------|-----------------------------------------------|----------|------------|------------|------------|-------------|-------------|-------------|-------------|---------|---------|---------|----------|----------|----------|----------|---------------|------------|-------------|
| 228771_at    | ADRBK2                                        | 7.88E-03 | 285.3      | 399.6      | 413.4      | 388.2       | 487.7       | 525.2       | 516.3       | 320.0   | 281.2   | 205.0   | 303.4    | 295.8    | 293.2    | 245.5    | 413.4         | 293.2      | 0.7         |
| 201924_at    | AFF1                                          | 9.48E-03 | 1009.3     | 1133.4     | 1333.6     | 1363.9      | 1235.0      | 1408.7      | 1170.4      | 847.2   | 1079.9  | 991.1   | 1110.2   | 734.3    | 887.4    | 934.8    | 1235.0        | 934.8      | 0.8         |
| 222126_at    | AGFG2                                         | 7.22E-03 | 124.0      | 96.3       | 136.9      | 140.8       | 105.0       | 122.3       | 100.8       | 93.1    | 62.5    | 59.1    | 100.2    | 64.7     | 125.1    | 69.7     | 122.3         | 69.7       | 0.6         |
| 228667_at    | AGPAT4                                        | 6.46E-03 | 1202.9     | 1220.1     | 1551.4     | 931.2       | 1156.8      | 1183.4      | 1142.2      | 1113.1  | 770.9   | 607.4   | 819.9    | 607.7    | 831.3    | 667.3    | 1183.4        | 770.9      | 0.7         |
| 225114_at    | AGPS                                          | 3.15E-03 | 1470.2     | 1464.9     | 1824.8     | 2148.5      | 1776.8      | 2060.4      | 2340.8      | 1094.5  | 1154.5  | 1511.4  | 1771.8   | 988.5    | 1198.0   | 1265.0   | 1824.8        | 1198.0     | 0.7         |
| 225113_at    | AGPS                                          | 3.17E-03 | 648.0      | 754.2      | 776.3      | 871.3       | 739.7       | 828.2       | 879.3       | 653.7   | 492.7   | 491.9   | 656.9    | 431.8    | 535.7    | 484.3    | 776.3         | 492.7      | 0.6         |
| 225108_at    | AGPS                                          | 1.01E-03 | 493.7      | 390.0      | 404.2      | 484.1       | 483.3       | 413.7       | 518.6       | 393.7   | 240.8   | 181.5   | 356.7    | 293.3    | 215.5    | 214.6    | 483.3         | 240.8      | 0.5         |
| 207193_at    | AGRP                                          | 9.91E-03 | 228.9      | 262.2      | 250.0      | 203.5       | 158.0       | 258.3       | 241.7       | 141.5   | 169.0   | 180.4   | 118.9    | 138.9    | 278.5    | 149.2    | 241.7         | 149.2      | 0.6         |
| 220846_at    | AHI1                                          | 3.62E-03 | 232.4      | 166.6      | 229.8      | 221.4       | 249.8       | 202.3       | 202.7       | 195.0   | 143.7   | 177.3   | 162.7    | 159.0    | 138.5    | 159.0    | 221.4         | 159.0      | 0.7         |
| 221569_at    | AHI1                                          | 4.39E-03 | 204.3      | 228.7      | 270.8      | 211.2       | 257.4       | 232.9       | 313.2       | 194.1   | 158.2   | 156.0   | 176.5    | 162.7    | 148.7    | 147.9    | 232.9         | 158.2      | 0.7         |
| 226665_at    | AHS2                                          | 4.85E-03 | 468.4      | 640.3      | 510.9      | 407.3       | 466.9       | 446.6       | 256.7       | 352.9   | 517.7   | 408.0   | 324.8    | 304.5    | 234.3    | 209.9    | 466.9         | 324.8      | 0.7         |
| 223136_at    | AIG1                                          | 7.16E-03 | 269.6      | 315.2      | 400.9      | 372.9       | 421.8       | 588.7       | 402.8       | 250.1   | 235.1   | 276.5   | 309.5    | 320.1    | 314.0    | 194.8    | 400.9         | 276.5      | 0.7         |
| 202588_at    | AK1                                           | 7.85E-03 | 167.2      | 161.5      | 140.7      | 138.8       | 172.6       | 153.5       | 127.7       | 138.5   | 134.5   | 100.1   | 106.3    | 132.8    | 135.1    | 109.8    | 153.5         | 132.8      | 0.9         |
| 202587_s_at  | AK1                                           | 8.41E-03 | 904.5      | 1198.6     | 901.8      | 870.2       | 877.4       | 820.8       | 717.1       | 615.6   | 752.6   | 493.1   | 505.3    | 817.4    | 783.1    | 554.6    | 877.4         | 615.6      | 0.7         |
| 201674_s_at  | AKAP1                                         | 7.30E-03 | 232.8      | 267.8      | 261.8      | 221.3       | 305.9       | 238.1       | 198.9       | 217.8   | 184.7   | 127.4   | 187.3    | 205.9    | 183.6    | 137.3    | 238.1         | 184.7      | 0.8         |
| 221718_s_at  | AKAP13                                        | 6.25E-03 | 2074.8     | 1794.9     | 1803.2     | 2257.9      | 2037.9      | 2300.0      | 2041.6      | 1768.0  | 1509.1  | 1480.9  | 1669.1   | 1489.0   | 1700.0   | 1766.8   | 2041.6        | 1669.1     | 0.8         |
| 230846_at    | AKAP5                                         | 9.04E-03 | 333.3      | 373.0      | 383.7      | 423.2       | 439.5       | 705.6       | 436.1       | 362.2   | 253.7   | 162.2   | 379.6    | 190.1    | 371.5    | 200.3    | 423.2         | 253.7      | 0.6         |
| 1555220_a_at | AKR1C12                                       | 4.79E-03 | 199.3      | 243.6      | 225.9      | 187.8       | 129.3       | 172.4       | 131.4       | 179.8   | 162.4   | 118.9   | 152.6    | 108.1    | 95.7     | 69.5     | 187.8         | 118.9      | 0.6         |
| 218487_at    | ALAD                                          | 7.88E-04 | 489.9      | 729.3      | 619.8      | 873.0       | 715.2       | 931.1       | 615.1       | 422.6   | 367.2   | 249.4   | 592.3    | 364.1    | 429.0    | 244.6    | 715.2         | 367.2      | 0.5         |
| 205633_s_at  | ALAS1                                         | 8.94E-03 | 2126.4     | 2458.6     | 3182.3     | 3273.2      | 3058.3      | 3049.5      | 2887.7      | 2411.1  | 1661.0  | 1127.2  | 2433.1   | 1747.6   | 1768.6   | 1293.9   | 3049.5        | 1747.6     | 0.6         |
| 212224_at    | ALDH1A1                                       | 7.19E-03 | 5370.8     | 5956.2     | 7001.6     | 6141.4      | 5445.5      | 5501.0      | 5541.1      | 4404.2  | 5206.7  | 5273.8  | 5247.6   | 4024.2   | 4670.8   | 3806.8   | 5541.1        | 4670.8     | 0.8         |
| 210544_s_at  | ALDH3A2                                       | 3.63E-03 | 502.2      | 659.5      | 478.3      | 734.2       | 628.8       | 756.2       | 660.8       | 541.9   | 431.0   | 249.0   | 471.0    | 405.3    | 448.8    | 334.2    | 659.5         | 431.0      | 0.7         |
| 202054_s_at  | ALDH3A2                                       | 6.18E-04 | 1858.9     | 2090.2     | 1682.0     | 2332.0      | 1959.7      | 2253.2      | 2293.5      | 1474.7  | 1294.0  | 809.1   | 1453.8   | 1221.4   | 1426.8   | 981.7    | 2090.2        | 1294.0     | 0.6         |
| 202053_s_at  | ALDH3A2                                       | 1.02E-03 | 1656.3     | 1943.7     | 1639.1     | 1885.2      | 1798.0      | 2087.1      | 1871.6      | 1416.0  | 1356.6  | 825.0   | 1352.1   | 1102.1   | 1127.6   | 1061.6   | 1871.6        | 1127.6     | 0.6         |
| 208950_s_at  | ALDH7A1                                       | 8.00E-03 | 343.8      | 306.9      | 394.7      | 283.9       | 321.7       | 324.7       | 336.5       | 280.8   | 222.7   | 232.2   | 277.3    | 272.3    | 209.8    | 195.6    | 324.7         | 232.2      | 0.7         |
| 219374_s_at  | ALG9                                          | 3.48E-03 | 631.8      | 853.4      | 861.9      | 701.6       | 662.0       | 1003.4      | 937.4       | 618.1   | 541.3   | 539.5   | 540.6    | 465.3    | 600.0    | 473.5    | 853.4         | 540.6      | 0.6         |
| 213952_s_at  | ALOX5                                         | 4.16E-03 | 1749.9     | 1833.6     | 1855.1     | 1885.7      | 1622.3      | 1513.4      | 1674.8      | 1507.3  | 1074.3  | 739.8   | 1212.1   | 1293.1   | 1159.9   | 901.8    | 1749.9        | 1159.9     | 0.7         |
| 228342_s_at  | ALPK3                                         | 5.19E-03 | 199.8      | 304.2      | 264.6      | 279.1       | 172.6       | 278.0       | 355.2       | 221.5   | 146.7   | 118.1   | 224.7    | 96.9     | 131.3    | 142.5    | 278.0         | 142.5      | 0.5         |
| 214846_s_at  | ALPK3                                         | 1.77E-03 | 239.7      | 395.8      | 339.3      | 372.5       | 232.5       | 313.5       | 396.8       | 253.9   | 209.2   | 148.6   | 221.7    | 98.9     | 155.6    | 163.9    | 339.3         | 163.9      | 0.5         |
| 226291_at    | ALS2                                          | 9.13E-03 | 154.8      | 141.3      | 182.0      | 189.2       | 158.4       | 154.7       | 167.7       | 155.0   | 96.8    | 140.1   | 154.1    | 123.7    | 117.7    | 104.7    | 154.8         | 123.7      | 0.8         |
| 228094_at    | AMICA1                                        | 9.05E-04 | 3852.1     | 4547.3     | 4447.2     | 4936.7      | 3785.8      | 4936.3      | 2818.4      | 2713.3  | 2529.6  | 1261.4  | 2442.1   | 2722.8   | 2323.3   | 1220.8   | 4447.2        | 2442.1     | 0.5         |
| 226258_at    | AMN1                                          | 2.53E-03 | 91.4       | 100.9      | 107.8      | 106.4       | 85.7        | 118.6       | 90.9        | 71.3    | 88.6    | 68.5    | 81.1     | 53.5     | 60.5     | 60.5     | 100.9         | 68.5       | 0.7         |
| 225450_at    | AMOTL1                                        | 2.35E-03 | 638.5      | 1037.4     | 949.0      | 998.8       | 1011.7      | 1290.4      | 916.1       | 649.2   | 516.5   | 427.6   | 690.7    | 637.5    | 630.2    | 455.6    | 998.8         | 630.2      | 0.6         |
| 204294_at    | AMT                                           | 3.10E-03 | 105.4      | 120.4      | 206.4      | 161.5       | 153.1       | 165.2       | 124.8       | 105.3   | 82.3    | 85.2    | 93.2     | 105.8    | 85.2     | 67.9     | 153.1         | 85.2       | 0.6         |
| 208498_s_at  | AMY1A /// AMY1B /// AMY1C /// AMY2A /// AMY2B | 8.26E-03 | 283.6      | 220.7      | 336.2      | 241.8       | 441.1       | 263.5       | 299.8       | 283.1   | 145.7   | 199.9   | 211.9    | 288.7    | 173.9    | 129.9    | 283.6         | 199.9      | 0.7         |
| 225554_s_at  | ANAPC7                                        | 5.45E-03 | 762.9      | 886.4      | 906.9      | 1000.1      | 860.1       | 889.5       | 832.6       | 781.5   | 618.9   | 510.3   | 703.2    | 615.1    | 670.0    | 560.2    | 886.4         | 618.9      | 0.7         |
| 213569_at    | ANGEL1                                        | 2.64E-03 | 421.1      | 369.3      | 412.2      | 541.8       | 393.3       | 388.4       | 404.6       | 333.3   | 160.7   | 161.0   | 333.3    | 269.4    | 326.9    | 195.4    | 404.6         | 269.4      | 0.7         |
| 368665_at    | ANGEL1                                        | 3.06E-03 | 528.6      | 634.1      | 743.0      | 596.7       | 702.7       | 820.6       | 634.9       | 513.2   | 376.1   | 308.1   | 414.1    | 487.4    | 489.3    | 334.6    | 634.9         | 414.1      | 0.7         |
| 213099_at    | ANGEL1                                        | 4.23E-03 | 433.1      | 589.9      | 646.5      | 486.8       | 570.6       | 700.0       | 520.2       | 428.3   | 333.8   | 271.4   | 355.5    | 427.0    | 383.8    | 287.1    | 570.6         | 355.5      | 0.6         |
| 213035_at    | ANKRD28                                       | 8.30E-03 | 162.5      | 165.4      | 188.8      | 227.2       | 236.2       | 177.1       | 204.8       | 174.1   | 135.6   | 105.8   | 162.9    | 136.7    | 114.6    | 94.4     | 188.8         | 135.6      | 0.7         |
| 220144_s_at  | ANKRD5                                        | 1.64E-03 | 59.1       | 75.7       | 76.1       | 94.2        | 72.6        | 107.9       | 82.7        | 47.1    | 53.7    | 39.1    | 62.1     | 50.9     | 66.2     | 33.1     | 76.1          | 50.9       | 0.7         |
| 225731_at    | ANKRD50                                       | 9.77E-03 | 129.8      | 188.5      | 277.5      | 273.7       | 283.2       | 330.4       | 244.2       | 167.2   | 118.7   | 141.5   | 196.3    | 157.6    | 152.1    | 117.8    | 273.7         | 152.1      | 0.6         |
| 227034_at    | ANKRD57                                       | 8.11E-03 | 266.1      | 357.6      | 478.3      | 377.3       | 498.6       | 553.7       | 461.3       | 272.2   | 229.1   | 212.2   | 344.5    | 295.7    | 277.6    | 178.9    | 461.3         | 272.2      | 0.6         |
| 212747_at    | ANKS1A                                        | 5.99E-04 | 1492.5     | 1572.0     | 1386.5     | 1654.9      | 1429.5      | 1602.8      | 1455.0      | 1173.4  | 987.1   | 561.9   | 1025.0   | 806.0    | 1022.5   | 718.8    | 1492.5        | 987.1      | 0.7         |
| 201306_s_at  | ANP32B                                        | 6.22E-03 | 5006.9     | 5304.6     | 5457.5     | 4803.1      | 5328.5      | 5835.9      | 5379.8      | 4588.2  | 4207.2  | 3702.9  | 4255.1   | 3929.7   | 4282.9   | 3805.8   | 5328.5        | 4207.2     | 0.8         |
| 206200_s_at  | ANXA11                                        | 2.87E-03 | 2726.5     | 2442.8     | 2163.9     | 2227.0      | 1988.5      | 2071.0      | 2010.0      | 1890.9  | 1631.1  | 1091.5  | 1454.4   | 1693.0   | 1707.5   | 1469.0   | 2163.9        | 1631.1     | 0.8         |
| 214783_s_at  | ANXA11                                        | 4.15E-03 | 305.7      | 338.5      | 358.1      | 295.7       | 317.1       | 330.5       | 308.5       | 296.7   | 207.0   | 213.0   | 237.8    | 241.7    | 219.0    | 197.5    | 317.1         | 219.0      | 0.7         |
| 228727_at    | ANXA11                                        | 4.69E-03 | 189.2      | 172.3      | 228.4      | 224.0       | 207.2       | 233.2       | 226.6       | 198.2   | 94.8    | 65.9    | 137.5    | 138.7    | 88.2     | 78.0     | 224.0         | 94.8       | 0.4         |
| 211712_s_at  | ANXA9                                         | 8.51E-03 | 84.1       | 105.4      | 62.9       | 65.7        | 60.9        | 54.8        | 48.7        | 55.3    | 69.7    | 39.8    | 44.3     | 46.2     | 32.6     | 55.6     | 62.9          | 46.2       | 0.7         |
| 213215_at    | AP3S2                                         | 3.01E-03 | 93.6       | 108.6      | 127.2      | 111.6       | 143.1       | 149.7       | 103.8       | 80.3    | 79.3    | 56.5    | 88.0     | 99.5     | 77.1     | 55.3     | 111.6         | 79.3       | 0.7         |
| 228101_at    | APBA1                                         | 5.46E-03 | 73.9       | 64.6       | 126.1      | 121.1       | 125.1       | 104.2       | 105.4       | 77.6    | 55.1    | 68.3    | 60.0     | 64.2     | 57.8     | 41.2     | 105.4         | 60.0       | 0.6         |
| 206679_at    | APBA1                                         | 1.63E-03 | 81.7       | 85.6       | 145.4      | 141.1       | 125.6       | 124.0       | 114.9       | 71.9    | 62.8    | 56.9    | 78.5     | 66.5     | 49.1     | 42.2     | 124.0         | 62.8       | 0.5         |
| 230925_at    | APBB1IP                                       | 8.88E-04 | 486.6      | 695.4      | 520.0      | 583.2       | 638.3       | 505.7       | 449.8       | 392.1   | 405.9   | 286.5   | 421.0    | 410.8    | 382.8    | 296.6    | 520.0         | 392.1      | 0.8         |
| 219994_at    | APBB1IP                                       | 3.14E-03 | 190.5      | 187.6      | 200.2      | 232.0       | 201.2       | 165.4       | 150.3       | 152.3   | 136.8   | 111.2   | 189.7    | 137.2    | 132.2    | 114.7    | 190.5         | 136.8      | 0.7         |
| 210027_s_at  | APEX1                                         | 3.37E-03 | 2915.3     | 2760.4     | 2770.0     | 2781.7      | 2348.0      | 2737.7      | 2663.0      | 2454.9  | 1833.4  | 1174.4  | 2016.5   | 1789.0   | 1956.5   | 1523.7   | 2760.4        | 1833.4     | 0.7         |
| 226358_at    | APH1B                                         | 5.69E-03 | 548.5      | 702.5      | 806.6      | 761.8       | 904.8       | 1168.4      | 927.5       | 545.3   | 462.1   | 472.9   | 658.5    | 609.4    | 816.2    | 545.3    | 806.6         | 545.3      | 0.7         |
| 220023_at    | APOB48R                                       | 8.23E-03 | 557.2      | 471.8      | 515.3      | 610.3       | 389.8       | 456.5       | 499.0       | 367.1   | 240.2   | 194.6   | 325.9    | 342.9    | 447.6    | 341.1    | 499.0         | 341.1      | 0.7         |
| 224491_at    | APOL4                                         | 4.60E-03 | 264.6      | 242.3      | 218.0      | 238.9       | 234.8       | 362.0       | 148.0       | 238.1   | 169.1   | 140.    |          |          |          |          |               |            |             |

Supplementary Table S2. Continued.

| ID           | Gene Symbol       | p-value  | VW3_Saline | VW6_Saline | VW7_Saline | VW13_Saline | VW22_Saline | VW23_Saline | VW25_Saline | VW3_LPS | VW6_LPS | VW7_LPS | VW13_LPS | VW22_LPS | VW23_LPS | VW25_LPS | Median_saline | Median_LPS | Fold change |
|--------------|-------------------|----------|------------|------------|------------|-------------|-------------|-------------|-------------|---------|---------|---------|----------|----------|----------|----------|---------------|------------|-------------|
| 225171_at    | ARRHGAP18         | 3.99E-03 | 1581.7     | 1977.5     | 2722.0     | 2734.6      | 2376.3      | 2882.5      | 2399.7      | 1425.8  | 1717.1  | 1529.5  | 2037.6   | 1207.3   | 1456.5   | 1161.4   | 2399.7        | 1456.5     | 0.6         |
| 232543_x_at  | ARRHGAP9          | 3.39E-03 | 786.4      | 933.9      | 721.1      | 832.7       | 660.6       | 800.0       | 611.5       | 639.5   | 546.1   | 356.8   | 547.7    | 616.8    | 526.3    | 413.2    | 786.4         | 546.1      | 0.7         |
| 226906_s_at  | ARRHGAP9          | 2.69E-03 | 1139.4     | 1341.8     | 1058.0     | 1117.5      | 828.0       | 1029.6      | 892.4       | 903.0   | 779.7   | 517.6   | 663.7    | 784.3    | 682.7    | 542.4    | 1058.0        | 682.7      | 0.6         |
| 224451_x_at  | ARRHGAP9          | 2.30E-03 | 608.2      | 760.0      | 747.3      | 831.9       | 600.1       | 781.4       | 574.2       | 562.3   | 535.7   | 351.5   | 495.0    | 442.4    | 425.7    | 359.6    | 747.3         | 442.4      | 0.6         |
| 201288_at    | ARRHGDIB          | 6.37E-03 | 4643.8     | 4939.8     | 5418.0     | 6122.8      | 5235.4      | 6018.7      | 4940.4      | 4335.2  | 3998.6  | 3286.9  | 4724.5   | 4311.6   | 4299.3   | 3480.3   | 5235.4        | 4299.3     | 0.8         |
| 1555811_at   | ARRHGDIB          | 6.91E-03 | 146.0      | 173.7      | 181.1      | 185.3       | 157.5       | 168.0       | 214.9       | 102.7   | 150.4   | 138.9   | 164.5    | 137.0    | 117.8    | 149.2    | 173.7         | 138.9      | 0.8         |
| 213039_at    | ARRHGEF18         | 7.19E-03 | 903.4      | 1003.7     | 1271.2     | 1241.9      | 1165.0      | 1008.9      | 965.5       | 925.8   | 639.8   | 550.7   | 868.7    | 950.8    | 637.8    | 534.2    | 1008.9        | 639.8      | 0.6         |
| 209539_at    | ARRHGEF6          | 3.84E-03 | 1798.3     | 2434.0     | 2668.6     | 2528.7      | 2438.8      | 2759.2      | 1942.1      | 1579.1  | 1494.0  | 889.3   | 1859.6   | 1772.8   | 1361.3   | 941.3    | 2438.8        | 1494.0     | 0.6         |
| 203263_s_at  | ARRHGEF9          | 2.45E-03 | 102.5      | 120.2      | 155.0      | 155.4       | 179.4       | 166.7       | 156.7       | 100.1   | 70.4    | 73.5    | 91.2     | 115.8    | 100.8    | 58.9     | 155.4         | 91.2       | 0.6         |
| 202641_at    | ARL3              | 6.11E-03 | 482.2      | 407.1      | 396.3      | 403.1       | 400.8       | 433.8       | 346.2       | 397.3   | 345.9   | 262.7   | 301.8    | 373.3    | 280.9    | 229.9    | 403.1         | 301.8      | 0.7         |
| 1554480_a_at | ARMC10            | 6.11E-03 | 1744.2     | 1732.6     | 2279.2     | 1962.1      | 2113.4      | 2519.3      | 2056.0      | 1478.7  | 1581.2  | 1652.9  | 1646.0   | 1247.7   | 1547.1   | 1413.3   | 2056.0        | 1547.1     | 0.8         |
| 1555902_at   | ARMCX5            | 5.88E-03 | 59.9       | 50.8       | 67.8       | 55.5        | 59.6        | 76.1        | 56.1        | 56.1    | 39.0    | 51.6    | 39.7     | 45.3     | 38.1     | 36.0     | 59.6          | 39.7       | 0.7         |
| 230619_at    | ARNT              | 3.46E-03 | 745.5      | 828.0      | 795.6      | 704.1       | 679.7       | 988.8       | 659.9       | 613.0   | 537.3   | 382.1   | 589.5    | 503.6    | 625.6    | 486.5    | 745.5         | 537.3      | 0.7         |
| 225282_at    | ARRDC4            | 4.72E-03 | 823.2      | 886.9      | 1056.6     | 1621.0      | 1246.3      | 1101.2      | 1713.4      | 844.6   | 686.0   | 543.0   | 1148.1   | 522.3    | 514.1    | 605.8    | 1101.2        | 605.8      | 0.6         |
| 223695_s_at  | ARSD              | 9.96E-03 | 422.9      | 506.7      | 475.5      | 497.9       | 538.3       | 654.8       | 456.0       | 401.0   | 384.2   | 356.1   | 450.0    | 418.5    | 395.0    | 322.8    | 497.9         | 395.0      | 0.8         |
| 223223_at    | ARV1              | 1.23E-03 | 643.3      | 799.0      | 846.1      | 778.3       | 761.5       | 727.6       | 710.7       | 527.2   | 595.1   | 430.3   | 552.1    | 520.9    | 484.7    | 411.6    | 761.5         | 520.9      | 0.7         |
| 1555419_a_at | ASAH1             | 3.18E-03 | 6810.1     | 6787.4     | 5425.3     | 6389.2      | 6229.2      | 6013.5      | 5886.8      | 5702.4  | 5029.8  | 3258.9  | 4576.2   | 5201.5   | 4727.5   | 4332.8   | 6229.2        | 4727.5     | 0.8         |
| 218862_at    | ASB13             | 4.78E-03 | 346.3      | 532.1      | 624.0      | 489.6       | 585.7       | 610.6       | 425.4       | 344.7   | 289.4   | 194.6   | 378.1    | 339.6    | 330.3    | 191.8    | 532.1         | 330.3      | 0.6         |
| 205673_s_at  | ASB9              | 3.23E-03 | 67.6       | 89.1       | 67.7       | 83.5        | 77.5        | 96.5        | 66.3        | 62.0    | 67.1    | 36.6    | 66.4     | 44.3     | 55.7     | 31.0     | 77.5          | 55.7       | 0.7         |
| 213561_at    | ASF1A             | 3.53E-03 | 519.7      | 640.9      | 862.5      | 712.7       | 666.2       | 858.1       | 586.8       | 471.8   | 500.2   | 327.1   | 496.3    | 395.7    | 448.8    | 315.6    | 666.2         | 448.8      | 0.7         |
| 203428_s_at  | ASF1A             | 2.52E-03 | 1014.4     | 1329.5     | 1378.7     | 1220.1      | 1158.3      | 1551.2      | 1026.9      | 890.2   | 773.2   | 513.9   | 984.5    | 685.5    | 793.2    | 559.5    | 1220.1        | 773.2      | 0.6         |
| 218857_s_at  | ASRGL1            | 1.00E-03 | 320.3      | 338.4      | 322.7      | 478.8       | 273.5       | 531.2       | 259.8       | 275.4   | 189.7   | 148.5   | 279.1    | 175.7    | 258.2    | 93.1     | 322.7         | 189.7      | 0.6         |
| 222764_at    | ASRGL1            | 6.37E-03 | 125.4      | 142.8      | 245.9      | 197.4       | 137.8       | 186.9       | 206.8       | 139.4   | 80.7    | 78.5    | 124.6    | 91.4     | 81.2     | 62.7     | 186.9         | 81.2       | 0.4         |
| 228401_at    | ATAD2             | 1.25E-03 | 91.6       | 72.1       | 116.2      | 117.3       | 101.8       | 95.8        | 116.6       | 59.9    | 56.9    | 71.1    | 85.2     | 39.0     | 50.0     | 53.7     | 101.8         | 56.9       | 0.6         |
| 226684_at    | ATG2B             | 2.90E-03 | 148.5      | 169.1      | 231.4      | 230.5       | 260.1       | 303.0       | 278.9       | 135.2   | 110.5   | 176.2   | 181.6    | 136.1    | 175.6    | 163.7    | 231.4         | 163.7      | 0.7         |
| 228190_at    | ATG4C ///<br>CTR9 | 4.26E-03 | 91.5       | 121.7      | 124.3      | 119.2       | 105.4       | 152.6       | 91.2        | 91.4    | 79.6    | 55.2    | 86.1     | 73.2     | 77.1     | 39.7     | 119.2         | 77.1       | 0.6         |
| 202512_s_at  | ATG5              | 7.81E-03 | 256.1      | 271.3      | 319.3      | 323.1       | 354.1       | 337.5       | 311.6       | 257.3   | 190.9   | 164.2   | 272.0    | 228.5    | 183.0    | 121.1    | 319.3         | 190.9      | 0.6         |
| 223340_at    | ATL1              | 5.70E-03 | 308.4      | 588.6      | 489.8      | 552.9       | 473.6       | 669.3       | 380.6       | 362.7   | 336.0   | 225.9   | 405.1    | 239.9    | 313.7    | 213.7    | 489.8         | 313.7      | 0.6         |
| 210858_x_at  | ATM               | 6.97E-03 | 513.8      | 564.5      | 582.7      | 527.9       | 565.7       | 631.8       | 525.5       | 452.4   | 469.3   | 378.2   | 476.1    | 428.8    | 464.0    | 364.6    | 564.5         | 452.4      | 0.8         |
| 212672_at    | ATM               | 5.22E-03 | 161.8      | 189.3      | 234.8      | 227.5       | 330.8       | 331.0       | 282.0       | 174.3   | 104.7   | 139.1   | 187.1    | 167.1    | 171.8    | 127.3    | 234.8         | 167.1      | 0.7         |
| 208442_s_at  | ATM               | 3.40E-03 | 299.2      | 327.1      | 364.6      | 363.8       | 386.4       | 531.7       | 370.1       | 281.2   | 224.8   | 185.4   | 296.1    | 259.5    | 315.8    | 197.9    | 364.6         | 259.5      | 0.7         |
| 212135_s_at  | ATP2B4            | 5.94E-03 | 124.2      | 136.2      | 127.2      | 212.9       | 187.3       | 213.5       | 165.9       | 128.9   | 106.8   | 85.7    | 150.8    | 107.6    | 136.4    | 117.3    | 165.9         | 117.3      | 0.7         |
| 45828_at     | ATP5SL            | 2.17E-03 | 1288.0     | 1163.8     | 1077.9     | 1001.9      | 942.9       | 898.3       | 901.1       | 971.3   | 871.6   | 689.7   | 711.6    | 744.8    | 782.3    | 611.3    | 1001.9        | 744.8      | 0.7         |
| 213587_s_at  | ATP6V0E2          | 2.77E-03 | 600.0      | 669.5      | 612.4      | 631.9       | 499.7       | 585.6       | 461.5       | 475.6   | 428.3   | 304.4   | 431.8    | 444.8    | 423.9    | 284.3    | 600.0         | 428.3      | 0.7         |
| 205198_s_at  | ATP7A             | 9.62E-03 | 263.9      | 326.7      | 445.7      | 388.8       | 448.4       | 501.3       | 454.6       | 311.6   | 197.5   | 185.7   | 338.9    | 227.5    | 235.9    | 189.6    | 445.7         | 227.5      | 0.5         |
| 1554704_at   | ATP8B3            | 3.47E-03 | 115.7      | 176.9      | 149.4      | 177.9       | 189.4       | 171.9       | 143.4       | 109.5   | 93.6    | 69.5    | 119.3    | 101.1    | 90.4     | 66.9     | 176.9         | 93.6       | 0.5         |
| 224728_at    | ATPAF1            | 3.47E-03 | 85.1       | 128.5      | 174.8      | 162.6       | 160.6       | 199.1       | 163.0       | 85.6    | 78.6    | 99.9    | 125.6    | 85.4     | 84.9     | 90.6     | 162.6         | 85.6       | 0.5         |
| 218671_s_at  | ATPIF1            | 2.96E-03 | 1138.6     | 1370.0     | 1180.0     | 1224.5      | 1218.4      | 1349.6      | 1091.8      | 929.8   | 982.8   | 523.3   | 888.5    | 957.5    | 902.2    | 659.8    | 1218.4        | 902.2      | 0.7         |
| 223338_s_at  | ATPIF1            | 1.15E-03 | 756.5      | 1021.5     | 1048.1     | 1228.5      | 1009.0      | 1379.5      | 1048.7      | 590.0   | 775.1   | 698.6   | 825.8    | 606.0    | 626.5    | 529.0    | 1048.1        | 626.5      | 0.6         |
| 235240_s_at  | ATXN3             | 3.54E-03 | 445.5      | 497.3      | 543.7      | 691.1       | 559.5       | 621.6       | 475.1       | 445.2   | 367.7   | 288.9   | 428.9    | 369.5    | 433.0    | 312.4    | 543.7         | 369.5      | 0.7         |
| 205052_at    | AUH               | 6.08E-03 | 145.7      | 202.7      | 326.8      | 255.8       | 286.4       | 307.7       | 226.4       | 166.0   | 117.2   | 129.3   | 194.7    | 148.4    | 105.6    | 89.0     | 255.8         | 129.3      | 0.5         |
| 218631_at    | AVP11             | 8.11E-04 | 1102.4     | 1233.2     | 1022.6     | 1220.3      | 926.9       | 1102.0      | 687.0       | 795.2   | 627.7   | 269.5   | 561.2    | 635.0    | 454.4    | 240.8    | 1102.0        | 561.2      | 0.5         |
| 214742_at    | AZI1              | 8.16E-03 | 177.3      | 140.8      | 183.6      | 214.4       | 181.6       | 185.4       | 181.4       | 152.5   | 110.6   | 126.3   | 159.3    | 169.0    | 153.0    | 134.0    | 181.6         | 152.5      | 0.8         |
| 203188_at    | B3GNT1            | 1.77E-03 | 207.5      | 288.5      | 325.9      | 262.0       | 270.7       | 326.5       | 198.0       | 179.7   | 184.4   | 110.5   | 177.9    | 141.6    | 167.3    | 109.5    | 270.7         | 167.3      | 0.6         |
| 1555963_x_at | B3GNT7            | 9.19E-03 | 4476.1     | 3512.1     | 3219.0     | 3309.1      | 3040.7      | 2559.3      | 2157.2      | 3626.4  | 2561.1  | 2038.3  | 2089.1   | 2726.9   | 2228.2   | 1850.3   | 3219.0        | 2228.2     | 0.7         |
| 1555962_at   | B3GNT7            | 5.36E-03 | 3547.3     | 2910.6     | 2735.0     | 2814.1      | 2614.6      | 2209.9      | 1975.5      | 3172.8  | 2063.1  | 1735.0  | 1808.3   | 2178.2   | 1814.5   | 1560.4   | 2735.0        | 1814.5     | 0.7         |
| 222463_s_at  | BACE1             | 3.29E-03 | 724.5      | 904.8      | 1125.1     | 985.2       | 934.7       | 1290.2      | 936.3       | 675.1   | 564.3   | 430.4   | 624.8    | 657.2    | 667.9    | 334.1    | 936.3         | 624.8      | 0.7         |
| 224335_s_at  | BACE1             | 3.01E-03 | 360.1      | 416.5      | 560.0      | 473.6       | 467.9       | 586.3       | 460.0       | 310.0   | 241.4   | 227.2   | 307.6    | 335.5    | 339.9    | 148.2    | 467.9         | 307.6      | 0.7         |
| 222462_s_at  | BACE1             | 8.32E-03 | 244.0      | 368.5      | 437.3      | 394.1       | 418.7       | 541.6       | 379.0       | 307.0   | 196.4   | 212.4   | 281.7    | 261.3    | 243.5    | 159.5    | 394.1         | 243.5      | 0.6         |
| 217904_s_at  | BACE1             | 1.74E-03 | 652.3      | 905.1      | 909.2      | 941.4       | 861.5       | 1172.2      | 754.0       | 588.7   | 522.9   | 343.6   | 566.9    | 544.1    | 541.6    | 257.2    | 905.1         | 541.6      | 0.6         |
| 228189_at    | BAG4              | 3.80E-03 | 472.3      | 600.2      | 950.3      | 825.0       | 737.5       | 1129.9      | 878.2       | 462.2   | 455.7   | 379.8   | 527.6    | 335.5    | 371.0    | 320.2    | 825.0         | 379.8      | 0.5         |
| 202985_s_at  | BAG5              | 8.97E-03 | 992.0      | 1035.1     | 1256.9     | 1152.0      | 1195.1      | 1266.1      | 1172.3      | 944.1   | 912.2   | 926.0   | 935.6    | 883.3    | 892.2    | 876.0    | 1172.3        | 912.2      | 0.8         |
| 202331_at    | BCKDHA            | 8.12E-03 | 99.0       | 87.5       | 164.0      | 121.0       | 151.1       | 139.6       | 119.5       | 103.1   | 48.8    | 81.8    | 93.0     | 115.3    | 92.0     | 85.1     | 121.0         | 92.0       | 0.8         |
| 222343_at    | BCL2L11           | 8.84E-03 | 133.5      | 127.7      | 155.0      | 153.7       | 202.7       | 194.7       | 140.0       | 145.7   | 84.3    | 96.1    | 108.4    | 147.5    | 98.4     | 105.3    | 153.7         | 105.3      | 0.7         |
| 1553088_a_at | BCL2L11           | 5.64E-03 | 114.9      | 120.4      | 91.4       | 112.4       | 86.6        | 109.1       | 76.3        | 100.9   | 76.6    | 60.3    | 67.9     | 69.5     | 54.0     | 67.8     | 109.1         | 67.9       | 0.6         |
| 213709_at    | BHLHB9            | 8.91E-03 | 61.0       | 61.2       | 88.2       | 75.3        | 88.7        | 86.0        | 75.7        | 65.9    | 48.3    | 45.9    | 59.3     | 55.2     | 49.1     | 36.5     | 75.7          | 49.1       | 0.6         |
| 201170_s_at  | BHLHE40           | 5.44E-03 | 872.1      | 748.6      | 1017.8     | 1224.7      | 934.0       | 984.3       | 900.0       | 879.3   | 571.8   | 557.1   | 746.5    | 681.6    | 558.2    | 673.0    | 934.0         | 673.0      | 0.7         |
| 201032_at    | BLCAP             | 4.84E-03 | 3187.4     | 3659.4     | 4151.2     | 4138.8      | 3668.7      | 4212.9      | 3241.9      | 3035.6  | 2736.5  | 2195.2  | 3107.7   | 2786.7   | 2962.2   | 2087.6   | 3668.7        |            |             |

TRANSCRIPTION PROFILES IN ALVEOLAR MACROPHAGES

Supplementary Table S2. Continued.

| ID                         | Gene Symbol          | p-value  | VW3_Saline | VW6_Saline | VW7_Saline | VW13_Saline | VW22_Saline | VW23_Saline | VW25_Saline | VW3_LPS | VW6_LPS | VW7_LPS | VW13_LPS | VW22_LPS | VW23_LPS | VW25_LPS | Median_saline | Median_LPS | Fold change |
|----------------------------|----------------------|----------|------------|------------|------------|-------------|-------------|-------------|-------------|---------|---------|---------|----------|----------|----------|----------|---------------|------------|-------------|
| 231810_at                  | BR13BP               | 4.26E-03 | 150.0      | 191.3      | 199.0      | 189.6       | 228.8       | 226.2       | 201.0       | 146.5   | 111.3   | 74.6    | 155.3    | 123.5    | 98.1     | 70.1     | 199.0         | 111.3      | 0.6         |
| 202427_s_at                | BRP44                | 1.34E-03 | 2090.9     | 1940.4     | 1855.3     | 1535.4      | 1527.1      | 1779.8      | 1621.8      | 1517.1  | 1632.9  | 1166.0  | 1229.5   | 1027.3   | 1223.0   | 1102.3   | 1779.8        | 1223.0     | 0.7         |
| 227775_at                  | BRUNOL6              | 9.61E-03 | 100.5      | 133.9      | 140.8      | 91.8        | 113.3       | 124.4       | 121.1       | 96.2    | 92.4    | 84.4    | 78.7     | 98.5     | 89.9     | 74.5     | 121.1         | 89.9       | 0.7         |
| 204167_at                  | BTD                  | 4.26E-03 | 267.7      | 265.6      | 341.6      | 350.4       | 288.7       | 347.1       | 275.8       | 265.3   | 174.6   | 180.7   | 241.9    | 209.2    | 262.8    | 173.6    | 288.7         | 209.2      | 0.7         |
| 209846_s_at                | BTN3A2               | 8.83E-04 | 703.1      | 1116.3     | 1050.3     | 581.3       | 892.7       | 873.8       | 836.1       | 626.1   | 596.2   | 522.2   | 380.2    | 580.6    | 535.6    | 498.8    | 873.8         | 535.6      | 0.6         |
| 204820_s_at                | BTN3A2 ///<br>BTN3A3 | 5.01E-03 | 1046.9     | 1869.9     | 1927.5     | 1348.0      | 1698.1      | 1658.0      | 1686.6      | 1017.9  | 1302.4  | 1105.9  | 1163.2   | 954.9    | 786.1    | 1018.3   | 1686.6        | 1018.3     | 0.6         |
| 201456_s_at                | BUB3                 | 8.15E-03 | 821.3      | 881.6      | 1015.8     | 871.5       | 828.8       | 937.0       | 824.9       | 701.3   | 626.1   | 869.3   | 820.2    | 546.0    | 688.0    | 596.2    | 871.5         | 688.0      | 0.8         |
| 201458_s_at                | BUB3                 | 9.86E-03 | 1363.0     | 1706.9     | 1944.8     | 1927.2      | 1941.6      | 1972.3      | 1786.9      | 1267.7  | 1440.7  | 1427.7  | 1763.3   | 1355.0   | 1210.1   | 1174.7   | 1927.2        | 1355.0     | 0.7         |
| 1561890_at                 | C10orf128            | 5.71E-03 | 82.2       | 136.9      | 198.6      | 231.6       | 110.0       | 213.2       | 107.4       | 80.5    | 78.7    | 35.7    | 151.9    | 53.1     | 47.2     | 38.1     | 136.9         | 53.1       | 0.4         |
| 228372_at                  | C10orf128            | 2.01E-03 | 2045.9     | 2925.5     | 3963.6     | 4957.2      | 3155.9      | 4546.8      | 2413.2      | 1834.2  | 1488.4  | 477.3   | 2206.9   | 842.1    | 1084.5   | 587.2    | 3155.9        | 1084.5     | 0.3         |
| 231530_s_at                | C11orf1              | 4.50E-03 | 564.8      | 663.6      | 694.8      | 623.4       | 643.7       | 757.3       | 565.1       | 565.6   | 443.2   | 403.7   | 442.9    | 495.8    | 544.4    | 372.1    | 643.7         | 443.2      | 0.7         |
| 1553787_at                 | C11orf45             | 9.01E-04 | 476.5      | 584.1      | 649.5      | 529.9       | 533.4       | 661.6       | 532.9       | 388.8   | 280.9   | 222.1   | 256.9    | 362.6    | 302.7    | 173.3    | 533.4         | 280.9      | 0.5         |
| 223009_at                  | C11orf59             | 3.42E-03 | 2160.7     | 2231.4     | 2634.5     | 2678.5      | 2570.3      | 3357.1      | 2943.5      | 2060.4  | 1419.6  | 1384.3  | 2009.0   | 1876.2   | 1777.9   | 1343.5   | 2634.5        | 1777.9     | 0.7         |
| 221599_at                  | C11orf67             | 4.00E-03 | 2118.1     | 2917.8     | 3097.4     | 2737.4      | 2973.2      | 3218.2      | 2781.1      | 1733.7  | 2730.0  | 2294.3  | 1985.7   | 2213.3   | 2197.5   | 1918.2   | 2917.8        | 2197.5     | 0.8         |
| 228249_at                  | C11orf74             | 6.95E-03 | 152.8      | 179.9      | 235.2      | 193.3       | 212.9       | 223.4       | 208.1       | 151.9   | 137.7   | 164.9   | 153.5    | 163.9    | 133.5    | 125.3    | 208.1         | 151.9      | 0.7         |
| 228281_at                  | C11orf82             | 2.09E-03 | 326.3      | 427.9      | 559.2      | 523.4       | 508.5       | 631.1       | 403.2       | 305.3   | 217.4   | 88.8    | 250.2    | 184.0    | 154.0    | 92.3     | 508.5         | 184.0      | 0.4         |
| 218220_at                  | C12orf10             | 7.85E-03 | 358.8      | 315.2      | 429.9      | 462.7       | 346.8       | 409.9       | 384.9       | 300.2   | 241.4   | 199.0   | 349.6    | 287.0    | 333.1    | 217.3    | 384.9         | 287.0      | 0.7         |
| 222613_at                  | C12orf4              | 6.37E-03 | 946.2      | 932.7      | 984.8      | 956.3       | 1001.3      | 839.4       | 930.7       | 828.9   | 807.6   | 750.9   | 829.7    | 721.8    | 591.8    | 636.7    | 946.2         | 750.9      | 0.8         |
| 219817_at                  | C12orf47             | 6.85E-03 | 180.1      | 198.0      | 220.3      | 219.7       | 169.7       | 227.4       | 198.3       | 164.4   | 125.7   | 131.5   | 199.4    | 124.9    | 117.4    | 83.9     | 198.3         | 125.7      | 0.6         |
| 225772_s_at                | C12orf62             | 2.64E-03 | 1489.0     | 1854.5     | 1662.5     | 1553.4      | 1742.0      | 2016.0      | 1559.0      | 1400.8  | 1154.0  | 786.0   | 1150.1   | 1243.2   | 1207.7   | 861.5    | 1662.5        | 1154.0     | 0.7         |
| 218723_s_at                | C13orf15             | 2.30E-03 | 3231.0     | 2897.3     | 2188.3     | 2529.1      | 1819.0      | 2256.6      | 1906.0      | 2363.7  | 1997.7  | 1455.4  | 1542.9   | 1068.8   | 1936.9   | 1610.0   | 2256.6        | 1610.0     | 0.7         |
| 206500_s_at                | C14orf106            | 1.02E-03 | 1655.5     | 1942.6     | 2109.1     | 2095.6      | 1808.2      | 2222.1      | 1493.0      | 1303.0  | 977.9   | 658.7   | 1362.1   | 1103.9   | 936.5    | 551.5    | 1942.6        | 977.9      | 0.5         |
| 223060_at                  | C14orf119            | 3.11E-03 | 2605.6     | 2705.4     | 2544.1     | 2729.9      | 2731.0      | 2340.1      | 2129.7      | 2356.1  | 1989.5  | 1685.1  | 2079.9   | 2049.4   | 1838.5   | 1549.6   | 2605.6        | 1989.5     | 0.8         |
| 214264_s_at                | C14orf143            | 5.64E-03 | 104.5      | 149.8      | 159.4      | 174.2       | 177.2       | 168.5       | 116.4       | 117.2   | 97.0    | 106.5   | 120.7    | 104.0    | 89.1     | 72.3     | 159.4         | 104.0      | 0.7         |
| 233859_at                  | C14orf145            | 5.12E-03 | 89.5       | 78.1       | 74.2       | 75.2        | 76.9        | 57.9        | 72.5        | 61.1    | 64.6    | 58.2    | 55.0     | 53.8     | 49.8     | 63.0     | 75.2          | 58.2       | 0.8         |
| 213508_at                  | C14orf147            | 5.43E-03 | 238.6      | 372.4      | 378.9      | 384.9       | 374.1       | 407.5       | 299.1       | 266.4   | 256.6   | 160.4   | 258.9    | 223.2    | 209.7    | 157.8    | 374.1         | 223.2      | 0.6         |
| 225990_at                  | C14orf43             | 7.99E-03 | 177.7      | 197.7      | 236.0      | 248.6       | 281.0       | 286.6       | 251.1       | 188.7   | 132.0   | 111.7   | 207.7    | 179.3    | 166.8    | 164.5    | 248.6         | 166.8      | 0.7         |
| 224804_s_at                | C15orf17             | 1.08E-03 | 1367.2     | 1564.5     | 1346.2     | 1321.2      | 1231.6      | 1334.5      | 1173.4      | 981.0   | 1003.4  | 567.9   | 907.4    | 863.5    | 952.2    | 711.4    | 1334.5        | 907.4      | 0.7         |
| 225300_at                  | C15orf23             | 2.20E-03 | 174.3      | 107.8      | 223.0      | 164.8       | 199.1       | 186.5       | 137.8       | 163.3   | 77.3    | 113.0   | 114.2    | 134.4    | 99.9     | 73.9     | 174.3         | 113.0      | 0.6         |
| 1552400_a_at               | C15orf27             | 1.17E-03 | 77.4       | 112.3      | 92.2       | 89.0        | 92.9        | 55.7        | 81.0        | 48.6    | 76.9    | 60.5    | 70.6     | 79.4     | 36.6     | 48.7     | 89.0          | 60.5       | 0.7         |
| 228666_at                  | C15orf38             | 9.01E-03 | 319.9      | 370.8      | 436.7      | 388.6       | 260.5       | 212.7       | 248.0       | 288.3   | 186.8   | 156.1   | 223.8    | 229.6    | 174.7    | 141.0    | 319.9         | 186.8      | 0.6         |
| 227272_at                  | C15orf52             | 1.14E-03 | 726.4      | 679.7      | 1033.8     | 782.7       | 708.2       | 700.0       | 637.2       | 558.8   | 291.2   | 219.0   | 392.5    | 409.3    | 323.0    | 205.9    | 708.2         | 323.0      | 0.5         |
| 1569065_s_at               | C15orf62             | 8.32E-03 | 170.9      | 136.2      | 136.3      | 135.5       | 154.4       | 146.3       | 131.2       | 151.0   | 115.5   | 76.5    | 100.0    | 117.1    | 116.3    | 106.6    | 136.3         | 115.5      | 0.8         |
| 1569064_at                 | C15orf62             | 5.88E-03 | 123.0      | 86.0       | 136.4      | 129.9       | 129.8       | 118.3       | 106.6       | 107.8   | 56.5    | 66.9    | 95.7     | 101.6    | 93.8     | 81.7     | 123.0         | 93.8       | 0.8         |
| 231878_at                  | C16orf53             | 4.75E-03 | 574.8      | 511.1      | 499.4      | 474.6       | 546.0       | 536.2       | 420.3       | 421.2   | 387.7   | 258.7   | 416.4    | 375.2    | 389.7    | 345.8    | 511.1         | 387.7      | 0.8         |
| 218300_at                  | C16orf53             | 1.49E-03 | 423.2      | 343.0      | 357.3      | 393.5       | 308.1       | 377.0       | 318.6       | 306.0   | 219.6   | 196.3   | 252.8    | 229.8    | 328.7    | 218.8    | 357.3         | 229.8      | 0.6         |
| 213235_at                  | C16orf88             | 7.22E-03 | 193.9      | 195.6      | 164.7      | 189.9       | 154.0       | 161.3       | 148.4       | 138.6   | 114.6   | 98.3    | 145.8    | 151.1    | 129.8    | 114.9    | 164.7         | 129.8      | 0.8         |
| 64438_at                   | C17orf101            | 7.20E-03 | 144.0      | 133.6      | 129.8      | 126.1       | 119.7       | 96.3        | 105.4       | 113.1   | 103.1   | 87.5    | 110.7    | 74.1     | 86.4     | 83.3     | 126.1         | 87.5       | 0.7         |
| 226657_at                  | C17orf103            | 2.45E-03 | 193.8      | 220.7      | 271.1      | 244.5       | 285.5       | 253.8       | 126.0       | 198.1   | 101.2   | 91.6    | 137.8    | 182.0    | 133.6    | 57.3     | 244.5         | 133.6      | 0.5         |
| 218464_s_at                | C17orf63             | 2.64E-03 | 559.3      | 667.2      | 760.4      | 680.0       | 649.6       | 781.9       | 665.2       | 528.5   | 425.1   | 403.4   | 541.3    | 420.9    | 485.0    | 348.6    | 667.2         | 425.1      | 0.6         |
| 229889_at                  | C17orf76             | 5.23E-03 | 227.9      | 434.6      | 313.9      | 455.4       | 353.3       | 440.3       | 333.4       | 262.0   | 226.0   | 86.8    | 295.3    | 174.5    | 214.9    | 110.3    | 353.3         | 214.9      | 0.6         |
| 236981_at                  | C17orf99             | 5.27E-04 | 182.1      | 179.3      | 230.5      | 277.6       | 229.0       | 360.6       | 187.5       | 133.9   | 84.2    | 111.5   | 176.5    | 156.7    | 241.1    | 120.2    | 229.0         | 133.9      | 0.6         |
| 227352_at                  | C19orf39             | 3.41E-03 | 107.3      | 92.9       | 100.4      | 102.6       | 121.3       | 116.3       | 90.6        | 89.3    | 70.8    | 83.6    | 80.2     | 71.9     | 86.6     | 64.9     | 102.6         | 80.2       | 0.8         |
| 235568_at                  | C19orf59             | 8.97E-03 | 13037.6    | 13791.1    | 12009.8    | 13553.5     | 12911.5     | 13432.1     | 13460.5     | 12803.6 | 11013.0 | 7388.7  | 11624.0  | 8014.0   | 10418.7  | 8867.3   | 13432.1       | 10418.7    | 0.8         |
| 51200_at                   | C19orf60             | 5.25E-03 | 1488.9     | 1592.4     | 1497.4     | 1633.4      | 973.2       | 1391.7      | 1335.1      | 1203.0  | 1112.4  | 764.3   | 1084.8   | 824.2    | 1224.1   | 886.5    | 1488.9        | 1084.8     | 0.7         |
| 228532_at                  | C1orf162             | 9.56E-03 | 3629.7     | 4238.7     | 4413.1     | 3917.3      | 3947.8      | 4672.8      | 3959.9      | 3774.3  | 2674.3  | 2274.0  | 3389.0   | 3124.9   | 2687.2   | 2163.3   | 4238.7        | 2687.2     | 0.7         |
| 229382_at                  | C1orf183             | 3.46E-03 | 128.7      | 160.4      | 151.8      | 158.8       | 140.5       | 161.8       | 135.0       | 122.5   | 93.0    | 71.1    | 120.8    | 97.5     | 110.7    | 81.6     | 151.8         | 97.5       | 0.6         |
| 1558693_s_at               | C1orf85              | 2.64E-03 | 471.9      | 420.9      | 426.5      | 482.9       | 403.1       | 349.5       | 379.2       | 337.0   | 239.9   | 180.9   | 320.1    | 346.6    | 261.2    | 242.8    | 420.9         | 261.2      | 0.6         |
| 225401_at                  | C1orf85              | 7.18E-03 | 456.5      | 423.3      | 459.8      | 509.3       | 454.1       | 421.8       | 441.4       | 415.0   | 273.2   | 209.5   | 361.0    | 437.3    | 246.7    | 252.8    | 454.1         | 273.2      | 0.6         |
| 1558692_at                 | C1orf85              | 5.99E-03 | 92.9       | 114.4      | 256.5      | 204.6       | 175.9       | 193.5       | 168.4       | 108.1   | 74.1    | 93.8    | 147.2    | 67.4     | 75.9     | 67.9     | 175.9         | 75.9       | 0.4         |
| 1555145_at                 | C1orf96              | 5.17E-03 | 57.9       | 57.0       | 90.5       | 87.8        | 75.1        | 95.6        | 54.9        | 56.6    | 38.3    | 59.9    | 68.7     | 48.2     | 51.3     | 43.1     | 75.1          | 51.3       | 0.7         |
| 225904_at                  | C1orf96              | 3.98E-03 | 609.8      | 903.6      | 980.5      | 872.0       | 786.2       | 1004.2      | 642.0       | 627.7   | 531.3   | 381.0   | 679.5    | 424.3    | 490.5    | 272.2    | 903.6         | 490.5      | 0.6         |
| 224693_at                  | C20orf108            | 7.05E-03 | 244.4      | 314.8      | 363.8      | 361.4       | 403.3       | 477.6       | 320.3       | 275.3   | 241.4   | 205.6   | 251.3    | 234.0    | 267.0    | 157.9    | 361.4         | 241.4      | 0.7         |
| 200855_at                  | C20orf191            | 8.30E-03 | 231.4      | 286.2      | 308.7      | 313.9       | 361.6       | 408.4       | 307.3       | 252.5   | 191.2   | 207.4   | 246.3    | 224.8    | 217.0    | 218.2    | 308.7         | 218.2      | 0.7         |
| /// LOC100131704 /// NCOR1 |                      |          |            |            |            |             |             |             |             |         |         |         |          |          |          |          |               |            |             |
| 226607_at                  | C20orf194            | 5.70E-03 | 319.0      | 343.4      | 436.0      | 361.9       | 391.1       | 420.9       | 393.7       | 288.4   | 268.9   | 259.1   | 289.0    | 327.5    | 295.8    | 238.4    | 391.1         | 288.4      | 0.7         |
| 225825_at                  | C20orf194            | 8.14E-03 | 332.1      | 341.2      | 370.4      | 351.3       | 375.9       | 384.7       | 319.5       | 335.5   | 229.7   | 245.4   | 250.2    | 329.6    | 277.3    | 225.8    | 351.3         | 250.2      | 0.7         |
| 218081_at                  | C20orf27             | 1.28E-04 | 239.3      | 248.6      | 245.9      | 263.8       | 261.5</     |             |             |         |         |         |          |          |          |          |               |            |             |

Supplementary Table S2. Continued.

| ID            | Gene Symbol | p-value   | VW3_Saline | VW6_Saline | VW7_Saline | VW13_Saline | VW22_Saline | VW23_Saline | VW25_Saline | VW3_LPS | VW6_LPS | VW7_LPS | VW13_LPS | VW22_LPS | VW23_LPS | VW25_LPS | Median_saline | Median_LPS | Fold change |
|---------------|-------------|-----------|------------|------------|------------|-------------|-------------|-------------|-------------|---------|---------|---------|----------|----------|----------|----------|---------------|------------|-------------|
| 212421_at     | C22orf9     | 1.23E-03  | 246.1      | 200.6      | 229.0      | 236.6       | 234.7       | 176.8       | 251.2       | 214.5   | 113.1   | 126.7   | 161.6    | 158.4    | 127.1    | 129.4    | 234.7         | 129.4      | 0.6         |
| 227144_at     | C22orf9     | 1.70E-03  | 220.0      | 152.4      | 218.5      | 249.7       | 218.6       | 153.0       | 232.1       | 175.1   | 114.0   | 99.8    | 152.2    | 128.8    | 116.9    | 108.6    | 218.6         | 116.9      | 0.5         |
| 212875_s_at   | C2CD2       | 4.74E-03  | 317.5      | 287.0      | 425.4      | 457.4       | 307.5       | 350.4       | 378.2       | 313.4   | 206.9   | 242.5   | 294.9    | 253.6    | 236.8    | 240.6    | 350.4         | 242.5      | 0.7         |
| 1556312_at    | C2orf71     | 1.84E-03  | 71.1       | 111.6      | 78.9       | 111.7       | 71.9        | 73.8        | 64.8        | 67.3    | 60.9    | 44.4    | 69.6     | 48.9     | 39.5     | 47.2     | 73.8          | 48.9       | 0.7         |
| 1568658_at    | C2orf74     | 1.32E-03  | 663.5      | 484.5      | 841.6      | 943.1       | 764.5       | 992.0       | 680.6       | 505.6   | 340.0   | 307.2   | 668.4    | 439.6    | 431.4    | 300.6    | 764.5         | 431.4      | 0.6         |
| 219114_at     | C3orf18     | 2.64E-03  | 67.7       | 56.4       | 90.7       | 80.9        | 95.2        | 69.8        | 83.0        | 46.9    | 41.1    | 56.5    | 71.4     | 54.6     | 58.7     | 51.2     | 80.9          | 54.6       | 0.7         |
| 226891_at     | C3orf21     | 6.76E-03  | 142.0      | 135.7      | 131.7      | 157.3       | 138.8       | 142.0       | 137.1       | 121.9   | 86.3    | 79.7    | 124.8    | 103.5    | 112.0    | 124.1    | 138.8         | 112.0      | 0.8         |
| 209285_s_at   | C3orf63     | 3.29E-03  | 547.7      | 729.1      | 718.7      | 659.8       | 934.7       | 847.5       | 753.1       | 550.2   | 549.2   | 405.5   | 470.4    | 534.4    | 490.7    | 458.1    | 729.1         | 490.7      | 0.7         |
| 223157_at     | C4orf14     | 2.40E-03  | 458.3      | 571.5      | 726.2      | 724.3       | 729.5       | 736.4       | 655.0       | 446.5   | 404.5   | 379.0   | 488.1    | 488.0    | 445.3    | 360.8    | 724.3         | 445.3      | 0.6         |
| 48030_at      | C5orf4      | 2.44E-03  | 470.6      | 617.8      | 476.1      | 390.1       | 497.2       | 601.8       | 325.6       | 359.9   | 422.2   | 147.7   | 270.3    | 316.5    | 317.3    | 183.6    | 476.1         | 316.5      | 0.7         |
| 48031_r_at    | C5orf4      | 7.19E-03  | 40.4       | 69.0       | 74.1       | 70.6        | 98.2        | 146.9       | 58.2        | 46.4    | 35.2    | 16.8    | 48.7     | 46.2     | 27.1     | 15.8     | 70.6          | 35.2       | 0.5         |
| 241874_at     | C5orf53     | 9.57E-03  | 148.1      | 136.5      | 129.8      | 121.8       | 149.2       | 122.7       | 122.3       | 126.7   | 116.6   | 89.6    | 96.2     | 132.6    | 99.7     | 96.1     | 129.8         | 99.7       | 0.8         |
| 226977_at     | C5orf53     | 6.45E-03  | 235.1      | 320.5      | 304.1      | 281.4       | 357.1       | 349.3       | 293.8       | 241.5   | 203.6   | 149.4   | 236.2    | 243.2    | 223.5    | 155.8    | 304.1         | 223.5      | 0.7         |
| 236178_at     | C6orf162    | 6.10E-03  | 222.7      | 266.4      | 179.9      | 157.7       | 159.0       | 190.1       | 161.4       | 171.1   | 134.2   | 102.4   | 153.0    | 131.6    | 132.8    | 94.4     | 179.9         | 132.8      | 0.7         |
| 218453_s_at   | C6orf35     | 8.48E-03  | 119.3      | 122.5      | 140.6      | 149.7       | 125.6       | 140.8       | 140.2       | 109.8   | 97.1    | 86.7    | 117.4    | 110.5    | 93.9     | 75.0     | 140.2         | 97.1       | 0.7         |
| 225729_at     | C6orf89     | 8.87E-03  | 471.5      | 516.2      | 498.0      | 591.1       | 570.8       | 633.8       | 519.9       | 507.4   | 339.5   | 254.8   | 404.8    | 442.9    | 454.4    | 359.4    | 519.9         | 404.8      | 0.8         |
| 220581_at     | C6orf97     | 2.64E-03  | 180.9      | 172.3      | 336.6      | 269.4       | 220.5       | 327.2       | 253.4       | 125.2   | 145.3   | 95.6    | 162.2    | 126.1    | 176.6    | 98.5     | 253.4         | 126.1      | 0.5         |
| 225419_at     | C7orf11     | 5.70E-03  | 443.4      | 500.6      | 518.2      | 527.5       | 538.6       | 603.6       | 532.0       | 424.2   | 389.4   | 390.9   | 426.8    | 370.8    | 426.5    | 402.9    | 527.5         | 402.9      | 0.8         |
| 224688_at     | C7orf42     | 8.12E-03  | 1766.0     | 1619.0     | 1409.9     | 1476.8      | 1526.5      | 1656.7      | 1406.1      | 1462.4  | 1254.5  | 890.9   | 1291.3   | 1353.5   | 1259.4   | 1086.8   | 1526.5        | 1259.4     | 0.8         |
| 226781_at     | C7orf55     | 5.53E-03  | 239.9      | 290.9      | 298.9      | 303.1       | 283.5       | 332.1       | 246.4       | 226.3   | 179.5   | 169.8   | 229.3    | 223.1    | 257.1    | 124.5    | 290.9         | 223.1      | 0.8         |
| 226780_s_at   | C7orf55     | 8.13E-03  | 346.2      | 422.1      | 400.8      | 375.6       | 390.1       | 445.4       | 323.4       | 363.9   | 243.3   | 195.7   | 294.4    | 315.9    | 256.3    | 150.5    | 390.1         | 256.3      | 0.7         |
| 218507_at     | C7orf68     | 9.33E-03  | 273.7      | 421.9      | 326.7      | 371.9       | 317.5       | 442.5       | 256.7       | 307.3   | 278.7   | 159.7   | 297.1    | 225.0    | 254.3    | 140.6    | 326.7         | 254.3      | 0.8         |
| 225534_at     | C8orf40     | 8.08E-03  | 1393.9     | 990.5      | 1385.3     | 1565.1      | 1427.7      | 1524.7      | 1426.7      | 1213.7  | 876.2   | 993.3   | 1308.2   | 1166.6   | 1182.0   | 1058.5   | 1426.7        | 1166.6     | 0.8         |
| 227672_at     | C8orf73     | 1.29E-03  | 386.8      | 387.6      | 587.1      | 568.4       | 467.0       | 433.2       | 463.3       | 279.8   | 222.7   | 157.8   | 276.8    | 268.5    | 289.0    | 180.4    | 463.3         | 268.5      | 0.6         |
| 224879_at     | C9orf123    | 3.39E-03  | 1508.4     | 1518.1     | 1466.4     | 1267.4      | 1317.9      | 1607.0      | 1503.8      | 1304.8  | 1017.8  | 773.7   | 1015.1   | 1020.5   | 1183.5   | 863.1    | 1503.8        | 1017.8     | 0.7         |
| 222781_s_at   | C9orf40     | 1.01E-03  | 325.7      | 402.2      | 360.3      | 384.4       | 253.0       | 346.3       | 297.2       | 269.8   | 280.9   | 229.9   | 292.4    | 142.6    | 235.6    | 201.5    | 346.3         | 235.6      | 0.7         |
| 223007_s_at   | C9orf5      | 8.10E-03  | 452.6      | 556.0      | 435.0      | 417.5       | 533.4       | 562.7       | 434.0       | 493.8   | 391.2   | 246.4   | 328.4    | 358.7    | 336.7    | 207.5    | 452.6         | 336.7      | 0.7         |
| 223008_s_at   | C9orf5      | 1.67E-03  | 934.7      | 1126.3     | 1180.9     | 1181.2      | 1383.3      | 1468.8      | 1245.8      | 838.0   | 795.8   | 803.4   | 885.1    | 819.7    | 852.8    | 684.2    | 1181.2        | 819.7      | 0.7         |
| 218168_s_at   | CABC1       | 5.83E-03  | 745.2      | 1158.3     | 1390.7     | 1138.5      | 1009.4      | 1121.6      | 755.3       | 663.0   | 581.3   | 229.5   | 658.6    | 713.0    | 452.3    | 257.3    | 1121.6        | 581.3      | 0.5         |
| 225531_at     | CABLES1     | 3.32E-03  | 122.5      | 178.7      | 199.0      | 171.2       | 144.0       | 143.0       | 137.2       | 121.1   | 96.8    | 64.0    | 82.9     | 105.6    | 77.0     | 68.9     | 144.0         | 82.9       | 0.6         |
| 225532_at     | CABLES1     | 2.30E-03  | 1202.9     | 1784.3     | 1632.5     | 1326.7      | 1231.5      | 1201.8      | 915.7       | 729.0   | 911.1   | 221.0   | 699.2    | 742.0    | 460.8    | 317.6    | 1231.5        | 699.2      | 0.6         |
| 1555993_at    | CACNA1D     | 4.55E-04  | 401.6      | 252.5      | 417.5      | 363.3       | 380.6       | 256.4       | 225.0       | 293.5   | 129.4   | 97.2    | 168.0    | 171.9    | 111.2    | 76.2     | 363.3         | 129.4      | 0.4         |
| 210691_s_at   | CACYBP      | 2.69E-03  | 949.7      | 1157.7     | 1250.9     | 1185.6      | 1049.9      | 1157.1      | 1101.7      | 820.6   | 792.9   | 535.1   | 882.3    | 683.4    | 753.3    | 504.5    | 1157.1        | 753.3      | 0.7         |
| 211761_s_at   | CACYBP      | 1.69E-03  | 577.4      | 724.5      | 800.0      | 701.4       | 738.8       | 780.6       | 643.9       | 499.1   | 501.2   | 326.1   | 506.7    | 423.7    | 397.4    | 310.8    | 724.5         | 423.7      | 0.6         |
| 201381_x_at   | CACYBP      | 3.58E-04  | 1143.3     | 1223.9     | 1268.1     | 1246.9      | 1101.4      | 1212.7      | 1090.5      | 852.1   | 853.8   | 637.9   | 847.1    | 702.1    | 707.9    | 587.9    | 1212.7        | 707.9      | 0.6         |
| 209002_s_at   | CALCOCO1    | 12.00E-03 | 407.1      | 471.4      | 513.3      | 516.6       | 490.6       | 517.6       | 513.8       | 391.6   | 260.9   | 286.5   | 355.4    | 346.3    | 336.8    | 284.5    | 513.3         | 336.8      | 0.7         |
| 226959_at     | CAMK1D      | 2.12E-03  | 483.9      | 352.3      | 372.9      | 644.8       | 372.8       | 367.0       | 301.6       | 372.9   | 220.7   | 191.0   | 334.4    | 287.5    | 312.7    | 189.8    | 372.8         | 287.5      | 0.8         |
| /// LOC283070 |             |           |            |            |            |             |             |             |             |         |         |         |          |          |          |          |               |            |             |
| 226382_at     | CAMK1D      | 6.87E-03  | 195.1      | 199.5      | 248.1      | 367.2       | 249.2       | 251.9       | 184.5       | 234.2   | 108.1   | 126.5   | 231.2    | 137.3    | 176.6    | 109.6    | 248.1         | 137.3      | 0.6         |
| /// LOC283070 |             |           |            |            |            |             |             |             |             |         |         |         |          |          |          |          |               |            |             |
| 212757_s_at   | CAMK2G      | 4.36E-03  | 116.7      | 124.0      | 163.6      | 145.0       | 163.2       | 169.3       | 122.6       | 118.0   | 86.1    | 68.2    | 103.9    | 95.1     | 97.3     | 75.8     | 145.0         | 95.1       | 0.7         |
| 223460_at     | CAMKK1      | 9.20E-03  | 144.0      | 103.8      | 173.5      | 169.9       | 134.4       | 154.1       | 128.1       | 127.9   | 93.8    | 73.0    | 124.1    | 91.8     | 93.5     | 92.5     | 144.0         | 93.5       | 0.6         |
| 220410_s_at   | CAMSAP1     | 4.65E-03  | 607.4      | 498.8      | 629.9      | 650.5       | 623.5       | 617.9       | 655.9       | 517.4   | 418.3   | 419.7   | 534.3    | 374.6    | 484.6    | 479.2    | 623.5         | 479.2      | 0.8         |
| 220409_at     | CAMSAP1     | 2.68E-03  | 496.2      | 447.4      | 525.4      | 584.5       | 494.5       | 535.9       | 513.5       | 437.0   | 339.7   | 331.2   | 406.7    | 361.7    | 421.1    | 390.2    | 513.5         | 390.2      | 0.8         |
| 212711_at     | CAMSAP1     | 3.10E-03  | 671.2      | 691.9      | 672.1      | 777.6       | 737.7       | 788.7       | 740.7       | 628.5   | 549.0   | 462.1   | 550.3    | 420.0    | 534.8    | 507.8    | 737.7         | 534.8      | 0.7         |
| 212710_at     | CAMSAP1     | 4.65E-03  | 94.0       | 82.5       | 117.5      | 105.9       | 127.0       | 165.0       | 135.7       | 86.4    | 58.3    | 64.5    | 94.8     | 74.9     | 91.2     | 62.1     | 117.5         | 74.9       | 0.6         |
| 213268_at     | CAMTA1      | 6.60E-04  | 393.5      | 493.5      | 391.9      | 436.7       | 479.5       | 552.3       | 471.0       | 279.3   | 377.6   | 203.8   | 289.6    | 239.4    | 368.5    | 222.8    | 471.0         | 279.3      | 0.6         |
| 214475_x_at   | CAPN3       | 1.82E-03  | 433.2      | 367.8      | 411.1      | 472.3       | 373.1       | 363.6       | 317.0       | 351.3   | 243.2   | 251.6   | 339.4    | 317.8    | 265.4    | 222.6    | 373.1         | 265.4      | 0.7         |
| 218456_at     | CAPRIN2     | 2.58E-03  | 427.7      | 561.5      | 589.0      | 516.1       | 521.3       | 566.4       | 408.1       | 377.7   | 415.2   | 309.5   | 407.3    | 367.7    | 353.6    | 261.5    | 521.3         | 367.7      | 0.7         |
| 224910_at     | CARHSP1     | 6.30E-03  | 106.9      | 97.6       | 108.7      | 106.8       | 121.8       | 110.0       | 98.6        | 98.6    | 69.2    | 75.0    | 88.3     | 92.0     | 86.1     | 81.2     | 106.9         | 86.1       | 0.8         |
| 218153_at     | CARS2       | 5.07E-03  | 1073.3     | 1125.9     | 793.7      | 966.3       | 910.3       | 816.1       | 969.0       | 828.3   | 670.8   | 476.7   | 626.9    | 800.9    | 761.1    | 640.0    | 966.3         | 670.8      | 0.7         |
| 211922_s_at   | CAT         | 2.39E-03  | 2505.3     | 3058.4     | 2541.1     | 3007.8      | 2706.9      | 2898.1      | 2296.4      | 1981.9  | 1970.7  | 1137.5  | 1893.6   | 2218.4   | 2160.4   | 1402.3   | 2706.9        | 1970.7     | 0.7         |
| 225234_at     | CBL         | 8.26E-03  | 541.9      | 541.7      | 534.1      | 609.7       | 600.7       | 607.0       | 558.2       | 486.6   | 342.7   | 283.3   | 469.4    | 425.3    | 527.8    | 457.3    | 558.2         | 457.3      | 0.8         |
| 243475_at     | CBL         | 3.55E-03  | 1065.2     | 1176.6     | 1400.0     | 1376.4      | 1298.5      | 1592.5      | 1395.6      | 1008.2  | 870.0   | 814.3   | 1057.9   | 911.8    | 1059.7   | 1011.2   | 1376.4        | 1008.2     | 0.7         |
| 225231_at     | CBL         | 6.07E-03  | 482.3      | 557.1      | 738.5      | 720.9       | 754.2       | 984.8       | 901.5       | 482.9   | 425.8   | 434.6   | 594.5    | 450.0    | 476.3    | 498.0    | 738.5         | 476.3      | 0.6         |
| 229010_at     | CBL         | 6.24E-03  | 284.5      | 327.4      | 440.8      | 412.5       | 419.5       | 533.7       | 462.7       | 270.3   | 255.4   | 269.5   | 371.6    | 265.0    | 314.6    | 276.4    | 419.5         | 270.3      | 0.6         |
| 1553972_a_at  | CBS         | 7.59E-03  | 203.1      | 104.4      | 258.5      | 337.6       | 305.6       | 311.5       | 146.2       | 146.8   | 98.7    | 87.3    | 175.9    | 227.8    | 189.0    | 101.7    | 258.5         | 146.8      | 0.6         |
| 201518_at     | CBX1        | 5.94E-03  | 980.5      | 1109.1     | 1220.3     | 1046.5      | 1083.1      | 1093.7      | 960.1       | 951.8   | 952.8   | 691.6   | 788.6    | 666.1    | 646.5    | 673.6    | 1083.1        | 691.6      | 0.6         |
| 226085_at     | CBX5        | 3.68E-03  | 220.0      | 178.2      | 224.3      | 260.1       | 279.9       | 311.3       | 355.9       | 187.4   | 119.4   | 115.4   | 219.3    | 199.4    | 130.5    | 187.2    | 260.1         | 187.2      | 0.7         |
| 212914_at     | CBX7        | 2.33E-04  | 399.1      | 387.5      |            |             |             |             |             |         |         |         |          |          |          |          |               |            |             |

TRANSCRIPTION PROFILES IN ALVEOLAR MACROPHAGES

Supplementary Table S2. *Continued.*

| ID           | Gene Symbol | p-value  | VW3_Saline | VW6_Saline | VW7_Saline | VW13_Saline | VW22_Saline | VW23_Saline | VW25_Saline | VW3_LPS | VW6_LPS | VW7_LPS | VW13_LPS | VW22_LPS | VW23_LPS | VW25_LPS | Median_saline | Median_LPS | Fold change |
|--------------|-------------|----------|------------|------------|------------|-------------|-------------|-------------|-------------|---------|---------|---------|----------|----------|----------|----------|---------------|------------|-------------|
| 228495_at    | CCDC75      | 5.43E-03 | 177.7      | 285.4      | 322.3      | 318.7       | 288.8       | 387.7       | 300.0       | 216.6   | 146.2   | 124.9   | 227.1    | 138.9    | 166.1    | 115.3    | 300.0         | 146.2      | 0.5         |
| 222809_x_at  | CCDC85C     | 1.16E-03 | 592.1      | 767.8      | 728.3      | 691.7       | 638.7       | 822.6       | 502.0       | 460.4   | 405.5   | 167.1   | 377.3    | 327.7    | 360.6    | 154.6    | 691.7         | 360.6      | 0.5         |
| 37424_at     | CCHCR1      | 5.84E-03 | 190.3      | 184.2      | 202.1      | 204.5       | 199.9       | 195.2       | 187.2       | 158.7   | 135.3   | 142.3   | 146.0    | 172.4    | 161.6    | 159.1    | 195.2         | 158.7      | 0.8         |
| 209698_at    | CCHCR1      | 4.69E-03 | 141.6      | 120.1      | 153.4      | 158.0       | 127.5       | 130.5       | 147.7       | 112.7   | 89.5    | 119.8   | 118.3    | 117.6    | 102.4    | 104.0    | 141.6         | 112.7      | 0.8         |
| 42361_g_at   | CCHCR1      | 8.12E-03 | 135.4      | 122.1      | 157.1      | 157.9       | 156.0       | 134.2       | 166.7       | 117.1   | 115.2   | 100.8   | 104.5    | 119.9    | 112.1    | 107.8    | 156.0         | 112.1      | 0.7         |
| 201700_at    | CCND3       | 3.37E-03 | 3195.0     | 3486.1     | 3115.4     | 3548.1      | 3116.4      | 4546.9      | 3781.7      | 2983.6  | 2571.9  | 1158.7  | 2362.1   | 1568.9   | 2817.3   | 1664.7   | 3486.1        | 2362.1     | 0.7         |
| 202769_at    | CCNG2       | 4.39E-03 | 499.7      | 821.9      | 1242.9     | 1222.0      | 863.9       | 1435.4      | 830.0       | 496.4   | 506.2   | 319.5   | 783.0    | 496.2    | 493.6    | 310.0    | 863.9         | 496.2      | 0.6         |
| 211559_s_at  | CCNG2       | 9.27E-03 | 145.5      | 229.7      | 367.9      | 338.2       | 238.6       | 416.3       | 212.0       | 172.6   | 114.5   | 92.0    | 224.0    | 164.2    | 122.2    | 82.1     | 238.6         | 122.2      | 0.5         |
| 202770_s_at  | CCNG2       | 5.80E-03 | 97.1       | 195.5      | 276.4      | 247.8       | 195.5       | 308.0       | 173.1       | 117.2   | 82.8    | 80.7    | 164.0    | 114.3    | 96.1     | 55.7     | 195.5         | 96.1       | 0.5         |
| 204093_at    | CCNH        | 2.36E-03 | 550.3      | 622.0      | 723.7      | 855.0       | 778.1       | 898.3       | 795.4       | 499.9   | 478.3   | 513.1   | 632.7    | 545.9    | 545.9    | 498.1    | 778.1         | 513.1      | 0.7         |
| 221511_x_at  | CCPG1       | 8.50E-03 | 557.5      | 742.6      | 704.6      | 639.1       | 726.2       | 718.2       | 673.1       | 519.0   | 557.4   | 516.6   | 601.6    | 394.5    | 466.4    | 418.2    | 704.6         | 516.6      | 0.7         |
| 222156_x_at  | CCPG1       | 5.22E-03 | 418.5      | 472.1      | 640.9      | 594.6       | 601.3       | 697.0       | 631.1       | 361.4   | 395.5   | 458.8   | 479.2    | 336.5    | 328.5    | 323.0    | 601.3         | 361.4      | 0.6         |
| 205271_s_at  | CCRK        | 6.45E-03 | 132.7      | 133.2      | 172.9      | 141.8       | 165.6       | 192.6       | 173.2       | 132.9   | 93.5    | 95.3    | 121.1    | 103.0    | 135.4    | 114.6    | 165.6         | 114.6      | 0.7         |
| 226545_at    | CD109       | 4.69E-03 | 989.6      | 1217.4     | 1083.3     | 1060.5      | 1082.0      | 1454.8      | 1656.5      | 798.4   | 974.2   | 703.4   | 1010.9   | 593.6    | 809.7    | 945.2    | 1083.3        | 809.7      | 0.7         |
| 206206_at    | CD180       | 2.01E-03 | 106.7      | 104.2      | 96.0       | 123.9       | 112.5       | 128.9       | 74.0        | 80.0    | 66.3    | 42.6    | 84.5     | 92.1     | 76.9     | 53.7     | 106.7         | 76.9       | 0.7         |
| 38521_at     | CD22        | 5.03E-03 | 359.9      | 352.2      | 419.4      | 269.0       | 311.6       | 300.2       | 261.2       | 289.0   | 233.4   | 238.0   | 236.9    | 257.8    | 188.7    | 208.1    | 311.6         | 236.9      | 0.8         |
| 204581_at    | CD22        | 8.50E-03 | 320.0      | 354.7      | 398.9      | 291.1       | 319.2       | 315.2       | 278.4       | 268.8   | 237.1   | 234.3   | 212.9    | 256.0    | 304.9    | 211.7    | 319.2         | 237.1      | 0.7         |
| 217422_s_at  | CD22        | 8.54E-03 | 234.5      | 118.0      | 187.1      | 169.4       | 118.7       | 145.9       | 155.7       | 130.5   | 47.0    | 77.4    | 123.8    | 132.3    | 104.7    | 95.6     | 155.7         | 104.7      | 0.7         |
| 202256_at    | CD2BP2      | 8.83E-03 | 650.5      | 549.6      | 525.2      | 588.3       | 549.2       | 524.3       | 492.2       | 512.6   | 428.6   | 387.9   | 403.8    | 463.8    | 510.7    | 368.7    | 549.2         | 428.6      | 0.8         |
| 209933_s_at  | CD300A      | 7.59E-03 | 695.3      | 1154.5     | 770.9      | 684.0       | 737.5       | 441.6       | 883.4       | 557.1   | 687.3   | 308.0   | 312.5    | 669.6    | 334.7    | 662.9    | 737.5         | 557.1      | 0.8         |
| 1553043_a_at | CD300LP     | 2.99E-03 | 1094.1     | 1510.5     | 1596.9     | 1559.3      | 1533.1      | 2019.6      | 1542.0      | 1134.4  | 915.1   | 432.2   | 772.5    | 788.6    | 831.0    | 456.3    | 1542.0        | 788.6      | 0.5         |
| 206120_at    | CD33        | 9.33E-03 | 591.9      | 671.4      | 804.7      | 866.5       | 983.7       | 1016.3      | 838.4       | 686.4   | 435.7   | 371.7   | 638.5    | 692.2    | 601.7    | 465.8    | 838.4         | 601.7      | 0.7         |
| 207549_x_at  | CD46        | 7.63E-03 | 4155.2     | 4479.5     | 3961.6     | 4224.8      | 4344.8      | 4578.7      | 4070.7      | 3728.7  | 3711.6  | 2819.7  | 3615.1   | 3505.0   | 3596.3   | 2998.2   | 4224.8        | 3596.3     | 0.9         |
| 213958_at    | CD6         | 1.85E-03 | 150.3      | 146.8      | 136.4      | 159.0       | 111.4       | 144.5       | 128.6       | 124.5   | 103.4   | 84.3    | 107.5    | 96.6     | 84.3     | 78.2     | 144.5         | 96.6       | 0.7         |
| 211190_x_at  | CD84        | 7.33E-03 | 279.2      | 286.9      | 287.0      | 325.5       | 313.7       | 269.5       | 235.2       | 250.2   | 149.1   | 123.4   | 241.8    | 310.9    | 130.1    | 123.3    | 286.9         | 149.1      | 0.5         |
| 205988_at    | CD84        | 3.23E-03 | 350.1      | 326.8      | 460.9      | 576.1       | 484.3       | 446.0       | 445.7       | 291.6   | 177.8   | 194.8   | 382.1    | 448.0    | 222.0    | 219.7    | 446.0         | 222.0      | 0.5         |
| 212899_at    | CDC2L6      | 9.35E-03 | 407.7      | 464.1      | 418.9      | 376.0       | 449.5       | 518.8       | 325.2       | 414.5   | 306.7   | 296.5   | 321.0    | 325.9    | 246.5    | 186.7    | 418.9         | 306.7      | 0.7         |
| 212897_at    | CDC2L6      | 5.95E-03 | 166.5      | 169.3      | 232.5      | 212.0       | 246.1       | 239.0       | 174.2       | 173.7   | 128.3   | 141.2   | 162.9    | 147.9    | 122.3    | 109.5    | 212.0         | 141.2      | 0.7         |
| 203376_at    | CDC40       | 9.10E-03 | 630.2      | 649.1      | 769.1      | 763.5       | 772.1       | 794.3       | 689.6       | 606.2   | 505.2   | 469.5   | 696.7    | 541.0    | 578.3    | 472.2    | 763.5         | 541.0      | 0.7         |
| 218062_x_at  | CDC42EP4    | 4.32E-03 | 444.5      | 383.4      | 429.1      | 614.4       | 467.8       | 429.6       | 524.1       | 385.8   | 320.1   | 243.5   | 363.7    | 328.5    | 357.7    | 358.8    | 444.5         | 357.7      | 0.8         |
| 225081_s_at  | CDCA7L      | 2.93E-03 | 762.6      | 585.1      | 1478.9     | 927.0       | 831.0       | 1274.9      | 873.5       | 710.6   | 356.5   | 440.1   | 599.9    | 501.7    | 572.0    | 411.8    | 873.5         | 501.7      | 0.6         |
| 1554110_at   | CDCP1       | 5.66E-03 | 1378.9     | 1265.2     | 1364.0     | 999.1       | 1087.7      | 989.2       | 876.9       | 1323.4  | 1003.8  | 950.8   | 801.5    | 749.0    | 611.0    | 1087.7   | 831.5         | 831.5      | 0.8         |
| 218451_at    | CDCP1       | 9.88E-03 | 714.3      | 886.7      | 692.9      | 679.2       | 693.7       | 816.5       | 723.4       | 768.6   | 627.9   | 384.1   | 544.8    | 508.2    | 576.6    | 404.0    | 714.3         | 544.8      | 0.8         |
| 201253_s_at  | CDIPT       | 5.51E-03 | 214.3      | 236.7      | 370.7      | 382.5       | 317.6       | 360.9       | 364.6       | 226.0   | 164.5   | 231.4   | 274.8    | 221.2    | 233.3    | 184.1    | 360.9         | 226.0      | 0.6         |
| 203468_at    | CDK10       | 9.46E-03 | 458.9      | 304.2      | 413.7      | 450.3       | 348.5       | 409.0       | 417.5       | 367.8   | 246.3   | 363.3   | 380.2    | 277.2    | 351.9    | 324.4    | 413.7         | 351.9      | 0.9         |
| 204247_s_at  | CDK5        | 4.26E-03 | 100.6      | 74.5       | 116.9      | 142.3       | 106.8       | 121.4       | 91.3        | 78.2    | 53.7    | 52.7    | 98.3     | 90.0     | 87.7     | 66.0     | 106.8         | 78.2       | 0.7         |
| 218315_s_at  | CDK5RAP1    | 1.80E-03 | 597.2      | 623.7      | 700.8      | 632.6       | 549.8       | 626.4       | 549.3       | 452.9   | 419.3   | 394.0   | 495.2    | 449.8    | 470.6    | 362.2    | 623.7         | 449.8      | 0.7         |
| 218740_s_at  | CDK5RAP3    | 7.35E-03 | 3147.6     | 2868.8     | 2998.3     | 2852.3      | 2503.1      | 2580.6      | 2155.4      | 2480.5  | 1960.7  | 1825.2  | 2200.3   | 2293.1   | 2233.7   | 1666.2   | 2852.3        | 2200.3     | 0.8         |
| 214907_at    | CEACAM21    | 3.28E-03 | 272.8      | 157.5      | 337.9      | 397.2       | 175.1       | 362.5       | 278.6       | 210.7   | 96.8    | 122.9   | 187.5    | 163.5    | 215.8    | 115.9    | 278.6         | 163.5      | 0.6         |
| 239317_at    | CEACAM21    | 8.59E-03 | 56.5       | 127.6      | 175.4      | 197.4       | 116.7       | 224.7       | 105.2       | 61.7    | 82.2    | 33.3    | 133.6    | 59.3     | 63.4     | 25.9     | 127.6         | 61.7       | 0.5         |
| 216605_s_at  | CEACAM21    | 7.75E-03 | 280.2      | 176.7      | 422.2      | 418.1       | 209.0       | 421.6       | 330.4       | 270.8   | 141.6   | 149.8   | 248.2    | 145.2    | 265.1    | 124.0    | 330.4         | 149.8      | 0.5         |
| 204039_at    | CEBPA       | 2.52E-03 | 474.0      | 433.3      | 563.7      | 677.4       | 464.5       | 584.6       | 521.0       | 289.3   | 206.7   | 100.2   | 329.2    | 315.2    | 339.1    | 124.7    | 521.0         | 289.3      | 0.6         |
| 225527_at    | CEBPG       | 9.56E-03 | 1602.5     | 1454.9     | 1390.1     | 1458.9      | 1397.1      | 1373.9      | 1361.3      | 1405.2  | 1233.6  | 1065.7  | 1164.3   | 1034.3   | 1194.1   | 1129.9   | 1397.1        | 1164.3     | 0.8         |
| 223728_at    | CENPBD1     | 5.31E-03 | 1273.4     | 1157.6     | 1001.4     | 1069.1      | 1379.1      | 1297.8      | 1047.2      | 1072.0  | 1019.4  | 687.2   | 788.5    | 1054.5   | 1094.9   | 773.1    | 1157.6        | 1019.4     | 0.9         |
| 230436_s_at  | CENPV       | 6.86E-04 | 112.7      | 100.4      | 109.4      | 118.0       | 127.3       | 139.9       | 138.6       | 97.5    | 57.6    | 52.7    | 65.2     | 81.8     | 89.2     | 65.9     | 118.0         | 65.9       | 0.6         |
| 226610_at    | CENPV       | 6.14E-04 | 480.4      | 479.2      | 546.0      | 488.1       | 505.9       | 602.5       | 547.7       | 326.1   | 324.1   | 163.1   | 260.5    | 221.9    | 335.0    | 203.1    | 505.9         | 260.5      | 0.5         |
| 226611_s_at  | CENPV       | 1.23E-03 | 376.6      | 340.2      | 430.4      | 412.5       | 458.1       | 552.8       | 472.7       | 331.0   | 180.0   | 128.0   | 224.8    | 216.4    | 261.5    | 135.7    | 430.4         | 216.4      | 0.5         |
| 218827_s_at  | CEP192      | 3.02E-03 | 307.1      | 311.4      | 381.4      | 404.5       | 421.4       | 427.5       | 373.8       | 294.8   | 220.8   | 234.7   | 316.0    | 284.2    | 291.2    | 225.6    | 381.4         | 284.2      | 0.7         |
| 203166_at    | CFDP1       | 2.61E-03 | 2603.3     | 2665.1     | 2977.0     | 2651.9      | 2569.8      | 2679.6      | 2253.7      | 2309.0  | 2213.9  | 1818.1  | 1810.5   | 1780.2   | 1971.9   | 1550.7   | 2651.9        | 1818.1     | 0.7         |
| 234681_s_at  | CHD6        | 5.36E-03 | 177.2      | 143.4      | 209.5      | 188.9       | 233.2       | 202.8       | 184.0       | 154.3   | 108.6   | 146.7   | 171.0    | 168.6    | 136.1    | 145.6    | 188.9         | 146.7      | 0.8         |
| 226123_at    | CHD7        | 8.20E-03 | 286.2      | 331.9      | 346.3      | 364.3       | 377.1       | 409.1       | 280.0       | 264.8   | 189.7   | 224.9   | 278.5    | 349.1    | 302.1    | 197.0    | 346.3         | 264.8      | 0.8         |
| 218829_s_at  | CHD7        | 1.67E-03 | 640.0      | 833.3      | 942.0      | 913.1       | 1104.4      | 1141.2      | 785.1       | 545.3   | 541.8   | 538.2   | 778.2    | 635.6    | 726.6    | 491.2    | 913.1         | 545.3      | 0.6         |
| 231994_at    | CHDH        | 1.57E-03 | 251.1      | 207.4      | 386.9      | 338.5       | 248.6       | 235.9       | 268.9       | 206.1   | 151.1   | 154.0   | 169.7    | 159.7    | 156.2    | 126.2    | 251.1         | 156.2      | 0.6         |
| 1559591_s_at | CHDH        | 4.45E-04 | 455.5      | 431.4      | 602.9      | 473.5       | 452.2       | 370.2       | 430.0       | 343.4   | 251.3   | 230.3   | 246.0    | 273.4    | 228.6    | 184.2    | 452.2         | 246.0      | 0.5         |
| 229954_at    | CHDH        | 8.47E-04 | 609.0      | 619.7      | 746.2      | 736.8       | 720.2       | 642.0       | 621.0       | 577.5   | 269.0   | 279.0   | 357.2    | 376.3    | 324.0    | 220.2    | 642.0         | 324.0      | 0.5         |
| 1559590_at   | CHDH        | 8.69E-03 | 51.5       | 61.8       | 89.8       | 90.0        | 79.2        | 71.3        | 83.5        | 64.2    | 25.8    | 38.4    | 49.5     | 56.6     | 35.1     | 21.9     | 79.2          | 38.4       | 0.5         |
| 210416_s_at  | CHEK2       | 4.69E-03 | 169.8      | 164.9      | 196.4      | 187.6       | 198.9       | 180.4       | 144.8       | 170.0   | 92.5    | 91.7    | 164.3    | 105.8    | 102.3    | 87.2     | 180.4         | 102.3      | 0.6         |
| 221675_s_at  | CHPT1       | 6.11E-03 | 5364.0     | 5577.2     | 5762.9     | 5746.5      | 5277.7      | 7110.1      | 5364.2      | 4771.2  | 5065.9  | 4422.8  | 4316.3   | 3483.1   | 4515.5   | 4030.2   | 5577.2        |            |             |



Supplementary Table S2. Continued.

| ID           | Gene Symbol            | p-value  | VW3_Saline | VW6_Saline | VW7_Saline | VW13_Saline | VW22_Saline | VW23_Saline | VW25_Saline | VW3_LPS | VW6_LPS | VW7_LPS | VW13_LPS | VW22_LPS | VW23_LPS | VW25_LPS | Median_saline | Median_LPS | Fold change |
|--------------|------------------------|----------|------------|------------|------------|-------------|-------------|-------------|-------------|---------|---------|---------|----------|----------|----------|----------|---------------|------------|-------------|
| 219161_s_at  | CKLF                   | 4.65E-03 | 612.0      | 816.2      | 811.0      | 995.3       | 753.6       | 1012.7      | 997.9       | 653.7   | 623.2   | 386.1   | 600.2    | 425.7    | 406.1    | 426.6    | 816.2         | 426.6      | 0.5         |
| 201735_s_at  | CLCN3                  | 5.59E-03 | 599.2      | 562.8      | 622.5      | 599.5       | 652.9       | 648.9       | 666.8       | 569.3   | 385.2   | 466.0   | 531.8    | 439.7    | 439.1    | 431.3    | 622.5         | 439.7      | 0.7         |
| 201734_at    | CLCN3                  | 2.93E-03 | 1381.9     | 1394.0     | 1794.9     | 1748.3      | 1712.9      | 2127.6      | 2024.0      | 1172.2  | 1150.0  | 1065.5  | 1430.7   | 1165.7   | 1224.1   | 1208.4   | 1748.3        | 1172.2     | 0.7         |
| 205148_s_at  | CLCN4                  | 8.12E-03 | 76.2       | 107.4      | 137.4      | 83.9        | 115.3       | 116.7       | 89.8        | 83.1    | 54.2    | 77.4    | 73.0     | 74.6     | 48.9     | 46.4     | 107.4         | 73.0       | 0.7         |
| 214769_at    | CLCN4                  | 4.90E-03 | 209.2      | 278.4      | 356.2      | 237.7       | 321.3       | 408.1       | 267.5       | 213.3   | 166.9   | 138.0   | 183.7    | 187.5    | 161.0    | 92.9     | 278.4         | 166.9      | 0.6         |
| 221132_at    | CLDN18                 | 6.97E-03 | 82.6       | 66.0       | 80.7       | 79.3        | 61.3        | 65.6        | 65.1        | 58.9    | 55.6    | 36.3    | 55.0     | 49.5     | 49.7     | 51.4     | 66.0          | 51.4       | 0.8         |
| 202790_at    | CLDN7                  | 5.30E-03 | 170.8      | 185.1      | 259.0      | 234.7       | 153.6       | 323.3       | 167.8       | 181.1   | 129.2   | 133.0   | 163.2    | 104.9    | 180.8    | 75.5     | 185.1         | 133.0      | 0.7         |
| 1552398_a_at | CLEC12A                | 6.09E-03 | 1232.8     | 1663.1     | 1778.9     | 1624.9      | 2294.9      | 1903.0      | 1660.7      | 1251.5  | 1284.0  | 1182.5  | 1267.5   | 1592.7   | 1074.8   | 1077.0   | 1663.1        | 1251.5     | 0.8         |
| /// CLEC12B  |                        |          |            |            |            |             |             |             |             |         |         |         |          |          |          |          |               |            |             |
| 1556209_at   | CLEC2B                 | 5.99E-04 | 508.1      | 391.6      | 605.6      | 496.7       | 428.6       | 409.9       | 360.4       | 375.4   | 248.6   | 240.9   | 325.2    | 262.3    | 191.7    | 149.1    | 428.6         | 248.6      | 0.6         |
| 221724_s_at  | CLEC4A                 | 5.83E-03 | 538.1      | 619.0      | 1084.0     | 851.6       | 1041.2      | 1152.8      | 732.3       | 526.8   | 479.2   | 654.4   | 569.5    | 643.3    | 623.2    | 611.1    | 851.6         | 611.1      | 0.7         |
| 241098_at    | CLEC7A                 | 6.56E-03 | 103.9      | 114.2      | 207.2      | 148.6       | 121.0       | 144.5       | 114.2       | 93.0    | 104.7   | 120.4   | 114.2    | 88.7     | 82.2     | 77.3     | 121.0         | 93.0       | 0.8         |
| 1554406_a_at | CLEC7A                 | 7.85E-03 | 1331.7     | 1406.1     | 1920.2     | 1793.1      | 1451.3      | 1648.3      | 1369.5      | 1302.8  | 1099.2  | 1045.2  | 1134.2   | 1190.3   | 971.6    | 1067.2   | 1451.3        | 1099.2     | 0.8         |
| 1555213_a_at | CLEC7A                 | 5.25E-03 | 2213.5     | 2480.6     | 1555.5     | 1190.1      | 1664.6      | 1157.9      | 1406.7      | 1507.5  | 1667.0  | 729.8   | 796.6    | 1583.3   | 774.2    | 1152.6   | 1555.5        | 1152.6     | 0.7         |
| 1555756_a_at | CLEC7A                 | 4.43E-03 | 1235.1     | 1237.1     | 1743.4     | 1793.2      | 1437.4      | 1790.7      | 1427.6      | 1121.9  | 904.5   | 1000.3  | 1197.8   | 1209.0   | 827.6    | 876.9    | 1437.4        | 1000.3     | 0.7         |
| 221698_s_at  | CLEC7A                 | 1.40E-03 | 2437.9     | 2695.6     | 4027.7     | 3577.5      | 3065.6      | 3776.5      | 2816.2      | 1861.3  | 2201.5  | 1974.0  | 2374.6   | 1587.4   | 1520.0   | 1587.6   | 3065.6        | 1861.3     | 0.6         |
| 1555214_a_at | CLEC7A                 | 4.18E-03 | 391.9      | 424.7      | 774.9      | 622.2       | 487.4       | 733.8       | 521.3       | 364.4   | 283.5   | 275.9   | 345.9    | 389.4    | 285.5    | 211.5    | 521.3         | 285.5      | 0.5         |
| 219944_at    | CLIP4                  | 2.68E-03 | 807.0      | 994.7      | 997.6      | 1072.6      | 887.9       | 916.0       | 805.7       | 745.7   | 721.4   | 680.2   | 696.1    | 675.1    | 679.6    | 587.2    | 916.0         | 680.2      | 0.7         |
| 226425_at    | CLIP4                  | 9.66E-04 | 3605.4     | 4944.8     | 5279.7     | 5340.2      | 5061.9      | 5514.0      | 5171.8      | 2831.2  | 3651.5  | 2627.1  | 3905.1   | 2904.4   | 2865.3   | 2459.8   | 5171.8        | 2865.3     | 0.6         |
| 213839_at    | CLMN                   | 4.71E-03 | 105.5      | 108.7      | 136.8      | 125.3       | 209.5       | 134.9       | 157.1       | 97.3    | 65.2    | 51.1    | 113.4    | 113.7    | 72.0     | 66.7     | 134.9         | 72.0       | 0.5         |
| 209143_s_at  | CLNS1A                 | 9.29E-03 | 946.5      | 1070.3     | 1330.7     | 1110.0      | 1250.0      | 1363.0      | 1158.8      | 959.3   | 849.0   | 882.0   | 963.4    | 876.0    | 922.7    | 733.1    | 1158.8        | 882.0      | 0.8         |
| 226017_at    | CMITM7                 | 8.55E-03 | 466.3      | 588.1      | 615.3      | 548.5       | 591.5       | 580.1       | 499.9       | 514.5   | 356.6   | 297.0   | 367.9    | 499.2    | 349.5    | 272.2    | 580.1         | 356.6      | 0.6         |
| 227731_at    | CNBP                   | 3.97E-03 | 497.0      | 633.0      | 773.6      | 656.6       | 786.1       | 886.6       | 626.6       | 516.0   | 425.9   | 424.2   | 503.4    | 474.7    | 485.1    | 410.4    | 626.6         | 474.7      | 0.7         |
| 228437_at    | CNIH4                  | 5.51E-03 | 159.1      | 182.8      | 263.6      | 181.0       | 204.4       | 236.9       | 176.1       | 151.9   | 151.3   | 128.1   | 122.1    | 140.6    | 169.5    | 110.3    | 182.8         | 140.6      | 0.8         |
| 1554523_a_at | CNNM2                  | 7.18E-03 | 160.9      | 168.1      | 190.3      | 185.6       | 181.1       | 173.0       | 140.8       | 129.5   | 140.2   | 112.9   | 150.2    | 122.9    | 136.8    | 124.5    | 173.0         | 129.5      | 0.7         |
| 225053_at    | CNO17                  | 6.07E-03 | 1023.5     | 1088.3     | 1158.9     | 1229.5      | 1229.2      | 1374.0      | 1416.3      | 952.7   | 898.0   | 853.4   | 1012.2   | 914.1    | 978.3    | 896.7    | 1229.2        | 914.1      | 0.7         |
| 226751_at    | CNRI1                  | 3.71E-03 | 255.0      | 235.0      | 489.8      | 387.4       | 373.2       | 214.1       | 329.5       | 202.3   | 155.2   | 287.4   | 338.5    | 271.7    | 143.0    | 143.3    | 329.5         | 202.3      | 0.6         |
| 226277_at    | COL4A3BP               | 6.30E-03 | 3257.9     | 3575.4     | 4645.1     | 4531.8      | 5202.3      | 5335.1      | 4681.1      | 3273.7  | 2927.1  | 3150.6  | 3435.8   | 2987.9   | 2770.1   | 2800.7   | 4645.1        | 2987.9     | 0.6         |
| 52651_at     | COL8A2                 | 2.38E-03 | 363.7      | 393.8      | 398.1      | 345.1       | 304.2       | 300.8       | 283.0       | 300.2   | 259.0   | 206.0   | 242.0    | 241.2    | 230.0    | 195.9    | 345.1         | 241.2      | 0.7         |
| 221900_at    | COL8A2                 | 4.83E-04 | 442.1      | 477.5      | 557.5      | 515.1       | 411.0       | 405.5       | 365.5       | 340.0   | 312.1   | 262.0   | 294.8    | 254.5    | 285.9    | 221.8    | 442.1         | 285.9      | 0.6         |
| 221019_s_at  | COLEC12                | 1.13E-03 | 3309.4     | 3311.0     | 3333.1     | 2456.0      | 1486.2      | 2474.6      | 3873.1      | 2479.3  | 2735.7  | 1771.9  | 1550.9   | 640.7    | 1063.5   | 1827.1   | 3309.4        | 1771.9     | 0.5         |
| 218072_at    | COMMD9                 | 2.64E-03 | 1457.9     | 1489.5     | 1379.3     | 1655.5      | 1577.9      | 1513.1      | 1279.4      | 1350.3  | 898.0   | 689.5   | 1136.8   | 1243.4   | 970.7    | 805.6    | 1489.5        | 970.7      | 0.7         |
| 225747_at    | COQ10A                 | 5.19E-03 | 154.2      | 180.3      | 186.9      | 161.7       | 156.4       | 140.6       | 126.2       | 158.6   | 91.6    | 106.4   | 112.3    | 103.0    | 111.8    | 66.5     | 156.4         | 106.4      | 0.7         |
| 227177_at    | CORO2A                 | 1.78E-03 | 581.4      | 655.3      | 625.2      | 604.2       | 562.5       | 581.7       | 593.2       | 529.9   | 393.4   | 208.1   | 401.3    | 274.3    | 301.1    | 242.7    | 593.2         | 301.1      | 0.5         |
| 1552301_a_at | CORO6                  | 1.75E-03 | 63.1       | 84.3       | 65.7       | 75.1        | 78.2        | 65.6        | 57.0        | 43.9    | 62.9    | 41.2    | 54.5     | 47.6     | 46.2     | 51.2     | 65.7          | 47.6       | 0.7         |
| 203551_s_at  | COX11                  | 1.03E-03 | 145.0      | 155.9      | 178.6      | 183.3       | 169.2       | 143.0       | 136.0       | 136.9   | 96.2    | 89.6    | 111.6    | 100.7    | 78.6     | 66.8     | 155.9         | 96.2       | 0.6         |
| 221550_at    | COX15                  | 3.65E-03 | 652.9      | 684.9      | 1158.6     | 856.9       | 917.5       | 1381.2      | 941.5       | 587.7   | 571.3   | 581.9   | 653.9    | 505.8    | 651.8    | 494.3    | 917.5         | 581.9      | 0.6         |
| 219547_at    | COX15                  | 3.62E-03 | 515.1      | 506.9      | 828.2      | 747.1       | 761.3       | 1091.4      | 814.8       | 485.5   | 401.9   | 415.5   | 556.9    | 397.2    | 541.2    | 368.3    | 761.3         | 415.5      | 0.5         |
| 203663_s_at  | COX5A                  | 7.57E-03 | 3728.8     | 3699.9     | 3569.8     | 3491.1      | 3369.9      | 3480.6      | 3757.6      | 3226.7  | 2955.9  | 2485.5  | 2915.8   | 2966.1   | 2743.1   | 2840.7   | 3569.8        | 2915.8     | 0.8         |
| 224828_at    | CPEB4                  | 3.55E-03 | 2379.8     | 2508.4     | 3491.1     | 3420.3      | 3568.7      | 4116.3      | 3722.6      | 1857.5  | 2182.4  | 2735.2  | 2750.0   | 2031.1   | 2505.7   | 2404.3   | 3491.1        | 2404.3     | 0.7         |
| 218610_s_at  | CPPED1                 | 3.14E-03 | 214.2      | 149.2      | 165.5      | 196.8       | 176.0       | 222.2       | 149.4       | 187.9   | 121.0   | 105.4   | 133.7    | 118.3    | 122.5    | 118.8    | 176.0         | 121.0      | 0.7         |
| 239135_at    | CPPED1                 | 8.72E-03 | 149.7      | 250.2      | 223.9      | 275.6       | 211.8       | 272.2       | 186.7       | 158.9   | 175.5   | 151.4   | 216.8    | 141.3    | 125.7    | 118.3    | 223.9         | 151.4      | 0.7         |
| 201200_at    | CREG1                  | 9.39E-03 | 2344.4     | 2879.7     | 2859.3     | 3513.2      | 3274.7      | 3185.5      | 2707.1      | 2061.1  | 2463.3  | 2370.6  | 3026.2   | 2607.7   | 2166.7   | 1999.3   | 2879.7        | 2370.6     | 0.8         |
| 225324_at    | CRLS1                  | 5.63E-03 | 208.7      | 282.3      | 306.3      | 517.7       | 478.9       | 432.8       | 347.7       | 222.5   | 221.8   | 180.3   | 368.0    | 265.0    | 222.3    | 183.8    | 347.7         | 222.3      | 0.6         |
| 206914_at    | CRTAM                  | 4.78E-03 | 502.9      | 469.2      | 742.2      | 602.1       | 653.9       | 625.5       | 629.8       | 458.0   | 348.0   | 528.2   | 486.3    | 369.3    | 449.2    | 315.0    | 625.5         | 449.2      | 0.7         |
| 226656_at    | CRTAP                  | 1.53E-03 | 2465.2     | 2939.4     | 2791.1     | 2419.7      | 3313.0      | 3479.4      | 3196.1      | 2180.5  | 2064.4  | 1604.8  | 1600.0   | 2441.1   | 2486.3   | 1893.3   | 2939.4        | 2064.4     | 0.7         |
| 1555889_a_at | CRTAP                  | 3.59E-03 | 1456.9     | 1549.8     | 1935.2     | 1688.8      | 1990.6      | 2054.7      | 2042.3      | 1349.3  | 1320.8  | 1345.9  | 1170.9   | 1341.7   | 1248.6   | 1186.9   | 1935.2        | 1320.8     | 0.7         |
| 206777_s_at  | CRYBB2 ///<br>CRYBB2P1 | 9.36E-03 | 303.5      | 453.7      | 339.9      | 265.6       | 327.7       | 262.5       | 232.9       | 263.0   | 374.8   | 263.2   | 236.5    | 265.7    | 212.9    | 178.3    | 303.5         | 263.0      | 0.9         |
| 202950_at    | CRYZ                   | 8.97E-03 | 324.5      | 387.1      | 330.0      | 389.2       | 260.5       | 257.9       | 300.8       | 299.4   | 288.9   | 234.8   | 364.8    | 178.1    | 195.7    | 230.5    | 324.5         | 234.8      | 0.7         |
| 208660_at    | CS                     | 8.96E-03 | 1325.9     | 1828.8     | 1647.1     | 1687.3      | 1722.8      | 2086.1      | 1952.2      | 1353.8  | 1435.1  | 1241.9  | 1382.9   | 1209.1   | 1280.7   | 1277.0   | 1722.8        | 1280.7     | 0.7         |
| 210340_s_at  | CSF2RA                 | 8.56E-03 | 379.1      | 262.8      | 449.5      | 519.1       | 468.0       | 444.6       | 385.6       | 372.6   | 215.8   | 261.5   | 342.0    | 367.6    | 346.4    | 279.2    | 444.6         | 342.0      | 0.8         |
| 212073_at    | CSNK2A1                | 5.69E-03 | 467.6      | 472.4      | 676.6      | 603.4       | 609.5       | 658.3       | 600.1       | 438.6   | 386.8   | 352.4   | 464.1    | 440.5    | 439.5    | 405.9    | 603.4         | 438.6      | 0.7         |
| /// CSNK2A1P |                        |          |            |            |            |             |             |             |             |         |         |         |          |          |          |          |               |            |             |
| 204736_s_at  | CSPG4                  | 3.37E-03 | 107.8      | 98.2       | 69.2       | 117.0       | 128.8       | 192.2       | 86.2        | 101.1   | 55.2    | 56.5    | 75.2     | 84.6     | 141.1    | 55.6     | 107.8         | 75.2       | 0.7         |
| 200621_at    | CSR1                   | 2.09E-03 | 808.4      | 715.8      | 770.0      | 1007.8      | 839.5       | 812.5       | 778.9       | 714.8   | 459.3   | 394.9   | 677.1    | 639.2    | 596.8    | 478.0    | 808.4         | 596.8      | 0.7         |
| 201906_s_at  | CTDSPL                 | 7.01E-03 | 277.8      | 223.2      | 316.1      | 293.3       | 265.1       | 252.5       | 255.0       | 288.8   | 175.5   | 157.4   | 223.8    | 175.2    | 154.0    | 140.7    | 265.1         | 175.2      | 0.7         |
| 222819_at    | CTPS2                  | 8.31E-03 | 96.4       | 129.7      | 166.5      | 139.3       | 133.9       | 144.2       | 114.2       | 105.9   | 65.4    | 66.8    | 112.2    | 83.1     | 96.0     | 62.6     | 133.9         | 83.1       | 0.6         |
| 231234_at    | CTSC                   | 6.35E-03 | 106.9      | 174.5      | 219.5      | 172.7       | 205.8       | 223.5       | 234.9       | 103.9   | 108.1   | 99.2    | 161.1    | 73.1     | 74.4     | 92.5     | 205.8         | 99.2       | 0.5         |
| 1554569_a_at | CUGBP2                 | 8.52E-03 | 73.3       | 80.3       | 83.3       | 132.5       | 112.8       | 121.5       | 100.4       | 79.3    | 63.0    | 54.5    | 101.6    | 74.6     | 68.7     | 58.9     | 100.4         | 68.7       | 0.7         |
| 202157_s_at  | CUGBP2                 | 3.11E-03 | 785.1      | 1009.5     | 780.0      |             |             |             |             |         |         |         |          |          |          |          |               |            |             |

TRANSCRIPTION PROFILES IN ALVEOLAR MACROPHAGES

Supplementary Table S2. Continued.

| ID           | Gene Symbol              | p-value  | VW3_Saline | VW6_Saline | VW7_Saline | VW13_Saline | VW22_Saline | VW23_Saline | VW25_Saline | VW3_LPS | VW6_LPS | VW7_LPS | VW13_LPS | VW22_LPS | VW23_LPS | VW25_LPS | Median_saline | Median_LPS | Fold change |
|--------------|--------------------------|----------|------------|------------|------------|-------------|-------------|-------------|-------------|---------|---------|---------|----------|----------|----------|----------|---------------|------------|-------------|
| 203917_at    | CXADR                    | 7.30E-03 | 55.7       | 190.2      | 43.8       | 53.8        | 355.4       | 92.5        | 70.8        | 49.1    | 112.4   | 37.4    | 48.7     | 231.7    | 67.5     | 44.6     | 70.8          | 49.1       | 0.7         |
| 212977_at    | CXCR7                    | 3.21E-03 | 1144.8     | 1612.0     | 991.7      | 1557.2      | 1215.4      | 1570.7      | 1696.7      | 938.1   | 1118.5  | 689.3   | 1187.0   | 1031.7   | 1306.9   | 1172.8   | 1557.2        | 1118.5     | 0.7         |
| 225216_at    | CXorf39                  | 3.29E-03 | 408.2      | 467.7      | 533.6      | 527.6       | 564.0       | 583.9       | 574.0       | 389.6   | 362.1   | 324.2   | 400.3    | 303.5    | 332.2    | 309.0    | 533.6         | 332.2      | 0.6         |
| 202263_at    | CYB5R1                   | 7.88E-03 | 682.0      | 707.5      | 918.6      | 776.7       | 776.9       | 774.5       | 690.1       | 734.9   | 509.8   | 505.1   | 548.3    | 559.0    | 562.6    | 373.4    | 774.5         | 548.3      | 0.7         |
| 223645_s_at  | CYorf15B                 | 4.49E-03 | 113.1      | 129.7      | 146.9      | 130.6       | 128.4       | 142.2       | 121.2       | 103.8   | 85.6    | 99.7    | 114.6    | 80.7     | 68.5     | 74.7     | 129.7         | 85.6       | 0.7         |
| 203979_at    | CYP27A1                  | 5.94E-03 | 7827.2     | 7151.4     | 7864.0     | 7699.0      | 7509.5      | 6896.1      | 7599.3      | 6146.6  | 5671.9  | 5390.6  | 5391.0   | 6638.4   | 6123.4   | 5682.4   | 7599.3        | 5682.4     | 0.7         |
| 226393_at    | CYP2U1                   | 6.73E-03 | 298.8      | 391.6      | 478.7      | 379.4       | 473.2       | 592.3       | 355.5       | 295.6   | 292.3   | 210.3   | 310.0    | 311.2    | 298.6    | 205.2    | 391.6         | 295.6      | 0.8         |
| 226402_at    | CYP2U1                   | 2.92E-03 | 96.2       | 96.9       | 128.4      | 116.3       | 135.3       | 170.6       | 110.7       | 86.2    | 76.9    | 48.7    | 72.1     | 75.2     | 69.0     | 42.4     | 116.3         | 72.1       | 0.6         |
| 228391_at    | CYP4V2                   | 5.10E-03 | 257.1      | 380.6      | 334.3      | 424.2       | 493.9       | 392.8       | 394.6       | 300.8   | 211.4   | 165.3   | 292.2    | 300.9    | 194.9    | 182.7    | 392.8         | 211.4      | 0.5         |
| 231747_at    | CYSLTR1                  | 2.38E-03 | 805.4      | 1273.7     | 1580.1     | 1236.5      | 1208.0      | 1794.2      | 968.7       | 814.5   | 694.3   | 471.5   | 774.5    | 586.6    | 673.3    | 406.2    | 1236.5        | 673.3      | 0.5         |
| 230866_at    | CYSLTR1                  | 3.01E-03 | 178.3      | 220.5      | 348.2      | 298.0       | 315.1       | 451.1       | 251.4       | 172.2   | 139.2   | 93.9    | 180.4    | 128.9    | 123.2    | 69.7     | 298.0         | 128.9      | 0.4         |
| 220813_at    | CYSLTR2                  | 8.93E-03 | 71.5       | 112.6      | 122.8      | 101.4       | 123.3       | 110.2       | 62.6        | 66.6    | 70.8    | 52.5    | 100.0    | 77.7     | 49.0     | 40.4     | 110.2         | 66.6       | 0.6         |
| 212480_at    | CYTA                     | 9.63E-03 | 446.7      | 510.1      | 440.5      | 454.4       | 426.2       | 452.7       | 423.2       | 410.9   | 349.8   | 332.5   | 352.2    | 332.9    | 375.4    | 373.8    | 446.7         | 352.2      | 0.8         |
| 228738_at    | D2HGDH                   | 3.98E-03 | 769.2      | 1146.0     | 874.3      | 800.8       | 813.4       | 926.8       | 723.3       | 576.0   | 757.4   | 372.4   | 512.2    | 680.4    | 732.3    | 499.8    | 813.4         | 576.0      | 0.7         |
| 240873_x_at  | DAB2                     | 3.51E-03 | 1309.2     | 1103.1     | 1138.4     | 1389.3      | 1210.0      | 1108.5      | 1237.3      | 1047.0  | 907.9   | 788.1   | 1110.6   | 760.0    | 942.9    | 839.1    | 1210.0        | 907.9      | 0.8         |
| 210757_x_at  | DAB2                     | 3.78E-03 | 2227.9     | 1979.5     | 2120.4     | 2308.9      | 2107.3      | 2092.2      | 2520.8      | 1929.5  | 1563.6  | 1337.6  | 1692.5   | 1675.1   | 1576.4   | 1395.8   | 2120.4        | 1576.4     | 0.7         |
| 232898_at    | DAB2                     | 9.16E-03 | 179.9      | 148.7      | 206.8      | 258.0       | 227.9       | 227.2       | 230.2       | 198.9   | 98.7    | 148.7   | 202.7    | 126.9    | 157.0    | 131.2    | 227.2         | 148.7      | 0.7         |
| 201278_at    | DAB2                     | 7.88E-04 | 4332.6     | 3921.0     | 4136.4     | 4611.5      | 4402.0      | 4317.4      | 4680.9      | 3480.6  | 2808.3  | 1969.3  | 2983.9   | 2307.6   | 2787.9   | 2282.3   | 4332.6        | 2787.9     | 0.6         |
| 201280_s_at  | DAB2                     | 2.46E-03 | 960.6      | 878.0      | 1131.6     | 1490.2      | 1211.9      | 1237.1      | 1398.9      | 976.4   | 586.2   | 569.3   | 885.8    | 669.3    | 713.8    | 574.4    | 1211.9        | 669.3      | 0.6         |
| 226640_at    | DAGLB                    | 6.76E-03 | 183.3      | 156.5      | 146.5      | 208.6       | 172.9       | 175.9       | 155.5       | 155.4   | 95.3    | 84.2    | 151.6    | 146.7    | 143.0    | 130.6    | 172.9         | 143.0      | 0.8         |
| 218094_s_at  | DBNDD2                   | 8.78E-04 | 650.9      | 626.7      | 838.8      | 795.7       | 803.6       | 845.6       | 820.3       | 560.0   | 436.1   | 428.2   | 515.5    | 488.9    | 506.3    | 403.6    | 803.6         | 488.9      | 0.6         |
|              | /// SYS1 /// SYS1-DBNDD2 |          |            |            |            |             |             |             |             |         |         |         |          |          |          |          |               |            |             |
| 224748_at    | DCAF7                    | 3.95E-03 | 777.5      | 797.4      | 1038.7     | 1176.9      | 793.0       | 1191.7      | 838.0       | 776.4   | 652.8   | 607.6   | 751.6    | 498.9    | 669.7    | 553.4    | 838.0         | 652.8      | 0.8         |
| 209592_s_at  | DCAF7                    | 2.80E-03 | 685.2      | 584.2      | 518.2      | 652.0       | 520.1       | 700.2       | 496.2       | 479.3   | 465.6   | 371.9   | 374.5    | 442.1    | 476.6    | 400.2    | 584.2         | 442.1      | 0.8         |
| 224730_at    | DCAF7                    | 6.81E-03 | 1540.1     | 1545.1     | 1717.6     | 1740.0      | 1393.4      | 2286.4      | 1556.2      | 1623.5  | 1134.2  | 1064.3  | 1335.3   | 863.4    | 1168.6   | 1073.0   | 1556.2        | 1134.2     | 0.7         |
| 221745_at    | DCAF7                    | 2.70E-03 | 290.4      | 232.8      | 300.9      | 319.9       | 214.1       | 375.1       | 237.2       | 259.5   | 178.6   | 186.4   | 235.0    | 166.9    | 215.6    | 148.2    | 290.4         | 186.4      | 0.6         |
| 202250_s_at  | DCAF8                    | 4.41E-03 | 348.6      | 424.3      | 439.3      | 384.7       | 419.5       | 470.7       | 402.8       | 352.9   | 272.1   | 212.6   | 294.0    | 292.6    | 289.1    | 217.3    | 419.5         | 289.1      | 0.7         |
| 216885_s_at  | DCAF8                    | 1.02E-03 | 378.0      | 428.1      | 416.0      | 428.1       | 400.2       | 427.4       | 372.4       | 323.2   | 306.2   | 233.7   | 308.9    | 268.4    | 281.7    | 233.6    | 416.0         | 281.7      | 0.7         |
| 219490_s_at  | DCLRE1B                  | 2.84E-03 | 556.6      | 551.4      | 593.8      | 561.0       | 729.7       | 607.9       | 564.5       | 454.6   | 404.3   | 355.3   | 493.2    | 431.5    | 447.9    | 313.1    | 564.5         | 431.5      | 0.8         |
| 203409_at    | DDB2                     | 5.58E-03 | 541.2      | 524.4      | 824.1      | 668.8       | 452.4       | 607.4       | 507.4       | 572.3   | 270.0   | 301.6   | 463.6    | 317.8    | 364.9    | 249.0    | 541.2         | 317.8      | 0.6         |
| 225886_at    | DDX5                     | 5.58E-03 | 836.0      | 1084.5     | 1055.1     | 982.6       | 905.1       | 975.8       | 1036.5      | 777.1   | 708.1   | 597.5   | 874.0    | 693.3    | 644.7    | 584.9    | 982.6         | 693.3      | 0.7         |
| 204909_at    | DDX6                     | 5.48E-04 | 3222.5     | 3035.6     | 3435.7     | 3680.9      | 3218.2      | 3863.1      | 3259.8      | 2432.8  | 2195.5  | 2142.3  | 2402.5   | 2388.6   | 2382.9   | 2379.4   | 3259.8        | 2382.9     | 0.7         |
| 221293_s_at  | DEF6                     | 8.87E-03 | 269.4      | 229.6      | 269.0      | 324.3       | 237.0       | 284.7       | 256.9       | 189.9   | 146.6   | 103.4   | 185.9    | 236.3    | 247.1    | 115.7    | 269.0         | 185.9      | 0.7         |
| 226659_at    | DEF6                     | 3.37E-03 | 308.1      | 345.3      | 395.6      | 450.7       | 385.0       | 576.8       | 349.7       | 235.0   | 174.2   | 100.9   | 309.5    | 291.5    | 300.4    | 138.8    | 385.0         | 235.0      | 0.6         |
| 225637_at    | DEF8                     | 9.75E-04 | 548.1      | 617.3      | 603.1      | 641.2       | 559.4       | 536.5       | 486.8       | 424.2   | 329.2   | 241.6   | 389.2    | 413.3    | 341.7    | 277.7    | 559.4         | 341.7      | 0.6         |
| 226867_at    | DENND4C                  | 1.67E-03 | 1086.5     | 1499.1     | 1664.2     | 2000.8      | 1734.1      | 1579.2      | 1980.9      | 967.0   | 1122.2  | 1045.2  | 1346.1   | 925.2    | 1034.1   | 1001.5   | 1664.2        | 1034.1     | 0.6         |
| 218102_at    | DERA                     | 8.21E-03 | 824.8      | 749.1      | 862.9      | 770.9       | 941.1       | 928.2       | 725.1       | 814.9   | 565.3   | 555.6   | 644.5    | 762.6    | 610.8    | 501.5    | 824.8         | 610.8      | 0.7         |
| 202534_x_at  | DHFR                     | 1.82E-03 | 150.2      | 138.8      | 292.1      | 188.7       | 148.6       | 124.8       | 214.5       | 115.9   | 109.1   | 122.9   | 137.5    | 61.9     | 52.7     | 84.3     | 150.2         | 109.1      | 0.7         |
| 48808_at     | DHFR                     | 3.98E-03 | 86.2       | 103.4      | 139.5      | 116.7       | 88.7        | 116.6       | 121.0       | 89.5    | 74.1    | 74.1    | 78.8     | 50.4     | 48.3     | 60.8     | 116.6         | 74.1       | 0.6         |
| 202481_at    | DHRS3                    | 8.32E-03 | 1019.1     | 1300.4     | 1407.3     | 970.2       | 840.2       | 1133.4      | 898.3       | 773.2   | 489.8   | 261.6   | 554.3    | 927.7    | 495.9    | 277.3    | 1019.1        | 495.9      | 0.5         |
| 229579_s_at  | DISP2                    | 8.85E-03 | 58.5       | 48.4       | 68.7       | 59.5        | 61.3        | 91.0        | 56.1        | 61.6    | 25.9    | 23.0    | 46.6     | 41.5     | 40.1     | 36.1     | 59.5          | 40.1       | 0.7         |
| 236079_at    | DKFZp667E0512            | 6.84E-03 | 282.2      | 270.0      | 354.4      | 323.2       | 262.4       | 232.7       | 227.5       | 245.5   | 207.2   | 229.9   | 303.1    | 186.1    | 172.1    | 175.1    | 270.0         | 207.2      | 0.8         |
| 208216_at    | DLX4                     | 6.71E-03 | 154.5      | 221.6      | 193.4      | 259.9       | 176.9       | 213.6       | 189.9       | 162.0   | 153.7   | 86.7    | 168.1    | 135.5    | 129.4    | 84.5     | 193.4         | 135.5      | 0.7         |
| 202500_at    | DNAJB2                   | 7.37E-03 | 457.6      | 441.2      | 469.8      | 424.7       | 432.1       | 466.0       | 389.0       | 390.8   | 354.3   | 310.2   | 321.5    | 339.2    | 400.4    | 331.8    | 441.2         | 339.2      | 0.8         |
| 1554258_a_at | DNAJC5B                  | 6.93E-03 | 591.2      | 564.0      | 616.4      | 356.4       | 476.7       | 641.4       | 391.2       | 557.0   | 402.1   | 296.8   | 277.9    | 403.4    | 395.0    | 237.3    | 564.0         | 395.0      | 0.7         |
| 232798_at    | DNAJC5B                  | 8.52E-03 | 707.8      | 813.2      | 913.7      | 555.8       | 606.9       | 939.0       | 649.0       | 742.2   | 553.6   | 485.5   | 398.4    | 468.7    | 504.9    | 249.4    | 707.8         | 485.5      | 0.7         |
| 213088_s_at  | DNAJC9                   | 6.38E-03 | 508.4      | 529.1      | 488.1      | 478.8       | 495.7       | 463.8       | 523.5       | 457.7   | 394.4   | 317.6   | 436.3    | 344.5    | 346.3    | 293.5    | 495.7         | 346.3      | 0.7         |
| 203912_s_at  | DNASE1L1                 | 8.01E-03 | 2165.7     | 1906.0     | 1680.5     | 1870.3      | 1650.5      | 1712.2      | 1467.8      | 1558.6  | 1436.6  | 962.8   | 1250.0   | 1391.2   | 1588.1   | 1235.3   | 1712.2        | 1391.2     | 0.8         |
| 220380_at    | DNASE2B                  | 2.46E-03 | 325.2      | 324.4      | 370.6      | 199.6       | 215.2       | 268.3       | 190.8       | 372.8   | 159.1   | 170.0   | 112.0    | 108.3    | 116.5    | 76.6     | 268.3         | 116.5      | 0.4         |
| 222640_at    | DNMT3A                   | 5.22E-03 | 984.3      | 899.9      | 1171.5     | 1130.5      | 809.2       | 955.7       | 880.8       | 831.4   | 752.0   | 717.6   | 887.9    | 607.1    | 721.3    | 728.6    | 955.7         | 728.6      | 0.8         |
| 218457_s_at  | DNMT3A                   | 1.02E-03 | 313.0      | 285.1      | 373.3      | 452.0       | 312.6       | 352.2       | 297.0       | 265.3   | 169.9   | 231.0   | 299.2    | 211.6    | 244.1    | 227.5    | 313.0         | 231.0      | 0.7         |
| 226875_at    | DOCK11                   | 1.58E-03 | 4307.7     | 5197.1     | 4362.5     | 4341.7      | 4340.2      | 4990.8      | 4571.2      | 3620.6  | 3616.0  | 1921.7  | 3228.4   | 2437.4   | 3177.8   | 2700.2   | 4362.5        | 3177.8     | 0.7         |
| 238356_at    | DOCK11                   | 7.96E-04 | 1463.8     | 1531.6     | 1221.1     | 1177.6      | 1292.4      | 1355.0      | 1290.1      | 1048.8  | 1086.2  | 569.4   | 864.8    | 720.1    | 957.5    | 761.3    | 1292.4        | 864.8      | 0.7         |
| 213160_at    | DOCK2                    | 7.45E-03 | 835.8      | 890.5      | 690.4      | 805.5       | 906.0       | 728.0       | 700.6       | 800.8   | 521.7   | 390.3   | 613.7    | 691.7    | 610.8    | 506.6    | 805.5         | 610.8      | 0.8         |
| 214054_at    | DOK2                     | 3.11E-03 | 1143.4     | 1126.2     | 1117.1     | 1225.1      | 1040.5      | 1345.1      | 1068.1      | 859.2   | 590.8   | 291.4   | 712.9    | 802.8    | 826.7    | 410.7    | 1126.2        | 712.9      | 0.6         |
| 223553_s_at  | DOK3                     | 9.61E-03 | 1128.5     | 1097.3     | 1283.5     | 1328.3      | 1100.5      | 1292.7      | 1307.9      | 1116.3  | 888.7   | 802.9   | 1073.5   | 787.4    | 1041.0   | 930.7    | 1283.5        | 930.7      | 0.7         |
| 205248_at    | DOPEY2                   | 9.97E-03 | 126.6      | 136.1      | 159.7      | 177.5       | 156.4       | 138.9       | 129.3       | 133.9   | 71.6    | 78.9    | 141.5    | 129.4    | 91.0     | 64.6     | 138.9         | 91.0       | 0.7         |
| 219452_at    | DPEP2                    | 1.11E-03 | 3948.3     | 3916.4     | 3750.5     | 3462.2      | 3618.0      | 4290.7      | 3224.9      | 2981.0  | 2465.7  | 1795.4  | 1970.4   | 3017.2   | 2789.6   | 2057.6   | 3750.5        | 2465.7     | 0.7         |
| 212792_at    | DPY19L1                  | 3.7      |            |            |            |             |             |             |             |         |         |         |          |          |          |          |               |            |             |

Supplementary Table S2. *Continued.*

| ID          | Gene Symbol | p-value  | VW3_Saline | VW6_Saline | VW7_Saline | VW13_Saline | VW22_Saline | VW23_Saline | VW25_Saline | VW3_LPS | VW6_LPS | VW7_LPS | VW13_LPS | VW22_LPS | VW23_LPS | VW25_LPS | Median_saline | Median_LPS | Fold change |
|-------------|-------------|----------|------------|------------|------------|-------------|-------------|-------------|-------------|---------|---------|---------|----------|----------|----------|----------|---------------|------------|-------------|
| 232252_at   | DUSP27      | 7.45E-03 | 163.4      | 297.5      | 26.4       | 207.8       | 115.7       | 351.6       | 165.8       | 159.0   | 196.7   | 20.4    | 143.2    | 72.4     | 151.5    | 58.8     | 165.8         | 143.2      | 0.9         |
| 201536_at   | DUSP3       | 1.11E-03 | 1015.9     | 960.9      | 1017.7     | 1087.1      | 973.5       | 979.2       | 946.3       | 880.5   | 688.8   | 564.7   | 667.0    | 709.1    | 640.2    | 564.6    | 979.2         | 667.0      | 0.7         |
| 208955_at   | DUT         | 4.26E-03 | 180.3      | 191.0      | 164.5      | 170.1       | 167.5       | 173.9       | 140.7       | 158.1   | 135.3   | 131.2   | 141.4    | 130.8    | 106.5    | 97.7     | 170.1         | 131.2      | 0.8         |
| 57532_at    | DVL2        | 5.37E-03 | 686.5      | 593.4      | 695.6      | 604.4       | 701.7       | 640.4       | 560.4       | 634.2   | 508.1   | 450.5   | 458.3    | 498.6    | 486.1    | 414.6    | 640.4         | 486.1      | 0.8         |
| 202971_s_at | DYRK2       | 6.41E-03 | 99.2       | 77.3       | 170.6      | 149.9       | 114.5       | 142.9       | 129.4       | 110.2   | 41.0    | 59.9    | 95.6     | 79.9     | 78.7     | 46.0     | 129.4         | 78.7       | 0.6         |
| 202968_s_at | DYRK2       | 4.87E-03 | 93.7       | 81.2       | 117.2      | 122.3       | 112.4       | 128.5       | 117.7       | 101.4   | 52.9    | 68.0    | 88.2     | 68.6     | 79.2     | 55.4     | 117.2         | 68.6       | 0.6         |
| 202969_at   | DYRK2       | 3.05E-03 | 168.1      | 106.1      | 210.6      | 237.3       | 190.7       | 193.1       | 183.5       | 161.0   | 84.8    | 94.5    | 156.9    | 101.2    | 94.1     | 99.0     | 190.7         | 99.0       | 0.5         |
| 202970_at   | DYRK2       | 3.18E-03 | 94.5       | 95.4       | 189.6      | 176.0       | 119.5       | 173.8       | 166.0       | 87.8    | 66.4    | 61.9    | 121.8    | 55.1     | 86.0     | 60.7     | 166.0         | 66.4       | 0.4         |
| 241713_s_at | DYX1C1      | 7.89E-03 | 270.2      | 303.3      | 245.7      | 297.2       | 291.9       | 385.2       | 284.6       | 313.2   | 125.9   | 65.7    | 212.9    | 189.1    | 181.9    | 102.7    | 291.9         | 181.9      | 0.6         |
| 235273_at   | DYX1C1      | 5.85E-03 | 301.9      | 325.6      | 416.3      | 486.6       | 382.8       | 621.9       | 432.3       | 280.5   | 267.7   | 102.3   | 301.2    | 186.1    | 233.7    | 121.7    | 416.3         | 233.7      | 0.6         |
| 239785_at   | DZIP1L      | 3.18E-03 | 232.0      | 246.9      | 257.4      | 230.6       | 204.1       | 291.2       | 233.9       | 198.9   | 174.9   | 161.0   | 200.2    | 144.0    | 179.9    | 120.2    | 233.9         | 174.9      | 0.7         |
| 228361_at   | E2F2        | 2.86E-03 | 185.3      | 143.4      | 148.7      | 162.3       | 145.4       | 103.7       | 177.7       | 146.8   | 117.8   | 109.0   | 132.0    | 109.1    | 82.8     | 118.5    | 148.7         | 117.8      | 0.8         |
| 202735_at   | EBP         | 1.99E-03 | 2071.7     | 1966.8     | 1324.3     | 1475.5      | 1521.7      | 1575.6      | 1436.4      | 1822.2  | 1172.6  | 625.4   | 955.7    | 1074.4   | 1177.1   | 922.3    | 1521.7        | 1074.4     | 0.7         |
| 213787_s_at | EBP         | 5.23E-03 | 951.1      | 826.1      | 611.2      | 695.4       | 637.3       | 687.2       | 699.9       | 771.6   | 429.6   | 300.9   | 452.8    | 547.6    | 602.0    | 444.4    | 695.4         | 452.8      | 0.7         |
| 200789_at   | ECH1        | 4.57E-03 | 1737.2     | 1575.3     | 1760.7     | 1945.5      | 1290.9      | 1552.4      | 1563.9      | 1128.5  | 955.9   | 873.2   | 1202.7   | 1184.8   | 1438.9   | 922.3    | 1575.3        | 1128.5     | 0.7         |
| 219974_x_at | ECHDC1      | 2.12E-03 | 1038.9     | 1199.4     | 1508.4     | 1419.6      | 1280.8      | 1542.6      | 1271.7      | 821.0   | 988.2   | 972.7   | 1034.4   | 982.1    | 1031.3   | 1014.0   | 1280.8        | 988.2      | 0.8         |
| 223088_x_at | ECHDC1      | 3.23E-03 | 1860.7     | 1966.5     | 2078.0     | 2186.6      | 2175.7      | 2345.2      | 1939.5      | 1602.8  | 1579.3  | 1588.9  | 1663.1   | 1534.5   | 1642.8   | 1575.2   | 2078.0        | 1588.9     | 0.8         |
| 233124_s_at | ECHDC1      | 5.21E-03 | 1585.5     | 1810.7     | 1925.5     | 1971.9      | 1974.7      | 2094.8      | 1666.9      | 1434.7  | 1464.3  | 1392.2  | 1493.1   | 1461.9   | 1491.1   | 1412.1   | 1925.5        | 1461.9     | 0.8         |
| 223087_at   | ECHDC1      | 5.51E-03 | 903.5      | 1245.5     | 1719.0     | 1372.0      | 1586.6      | 1881.6      | 1383.2      | 932.9   | 941.1   | 975.6   | 1063.5   | 853.8    | 886.7    | 770.4    | 1383.2        | 932.9      | 0.7         |
| 235305_s_at | ECHDC2      | 4.99E-03 | 139.1      | 137.7      | 175.7      | 165.6       | 147.3       | 158.7       | 145.7       | 128.6   | 90.0    | 141.1   | 115.4    | 121.6    | 120.9    | 93.9     | 147.3         | 120.9      | 0.8         |
| 218552_at   | ECHDC2      | 3.71E-03 | 520.9      | 609.4      | 606.5      | 682.5       | 596.4       | 506.8       | 532.5       | 489.0   | 386.6   | 424.8   | 491.5    | 460.1    | 392.6    | 388.8    | 596.4         | 424.8      | 0.7         |
| 227780_s_at | ECSCR       | 8.68E-03 | 338.9      | 582.4      | 541.3      | 611.8       | 614.5       | 885.1       | 513.4       | 425.0   | 401.6   | 248.7   | 405.0    | 215.1    | 429.7    | 234.5    | 582.4         | 401.6      | 0.7         |
| 227779_at   | ECSCR       | 1.74E-03 | 830.9      | 864.0      | 836.5      | 913.9       | 783.2       | 1229.3      | 711.0       | 778.5   | 571.2   | 336.8   | 589.2    | 428.3    | 702.8    | 357.3    | 836.5         | 571.2      | 0.7         |
| 228339_at   | ECSCR       | 6.13E-03 | 320.9      | 454.3      | 482.5      | 533.3       | 537.7       | 809.0       | 471.1       | 385.5   | 273.3   | 194.0   | 364.2    | 211.5    | 379.9    | 150.0    | 482.5         | 273.3      | 0.6         |
| 233356_at   | EEF1DP3     | 4.20E-03 | 61.7       | 61.7       | 52.8       | 51.0        | 64.2        | 67.4        | 46.3        | 47.5    | 42.6    | 38.1    | 25.9     | 54.7     | 49.8     | 37.1     | 61.7          | 42.6       | 0.7         |
| 205249_at   | EGR2        | 1.57E-03 | 1740.4     | 1200.0     | 2688.7     | 2610.1      | 2366.5      | 2627.0      | 2215.1      | 1347.3  | 989.1   | 1120.3  | 1310.5   | 778.8    | 792.4    | 797.9    | 2366.5        | 989.1      | 0.4         |
| 208670_s_at | EID1        | 7.95E-03 | 4382.7     | 4551.7     | 4242.4     | 4776.1      | 4529.9      | 4826.1      | 4323.1      | 3814.8  | 3896.8  | 3266.6  | 4055.0   | 3401.0   | 3937.2   | 3395.7   | 4529.9        | 3814.8     | 0.8         |
| 217736_s_at | EIF2AK1     | 9.02E-03 | 559.0      | 564.2      | 632.7      | 663.2       | 608.3       | 712.5       | 633.7       | 555.2   | 418.3   | 461.7   | 549.7    | 467.9    | 564.5    | 444.3    | 632.7         | 467.9      | 0.7         |
| 218287_s_at | EIF2C1      | 7.55E-03 | 419.5      | 449.5      | 566.1      | 550.2       | 554.1       | 623.7       | 560.9       | 423.2   | 321.0   | 324.7   | 458.1    | 428.0    | 400.5    | 318.8    | 554.1         | 400.5      | 0.7         |
| 211937_at   | EIF4B       | 4.32E-03 | 4302.0     | 4234.3     | 4406.3     | 4321.6      | 4728.4      | 5407.5      | 4839.4      | 3864.7  | 3402.0  | 3163.7  | 3253.0   | 3804.3   | 4206.6   | 3252.2   | 4406.3        | 3402.0     | 0.8         |
| 219599_at   | EIF4B       | 1.83E-03 | 2046.5     | 2109.2     | 2912.9     | 2400.5      | 2850.3      | 3236.3      | 3409.4      | 1693.7  | 1705.2  | 1749.9  | 1782.4   | 2164.9   | 2184.0   | 2210.2   | 2850.3        | 1782.4     | 0.6         |
| 226734_at   | EIF4E2      | 2.58E-03 | 571.8      | 656.6      | 513.4      | 582.4       | 552.6       | 620.0       | 543.5       | 498.6   | 496.0   | 351.8   | 487.0    | 390.0    | 445.5    | 362.4    | 571.8         | 445.5      | 0.8         |
| 221539_at   | EIF4EBP1    | 7.27E-03 | 447.7      | 345.5      | 421.4      | 407.5       | 317.8       | 318.4       | 353.6       | 319.4   | 193.9   | 140.1   | 203.4    | 319.0    | 258.1    | 149.5    | 353.6         | 203.4      | 0.6         |
| 208770_s_at | EIF4EBP2    | 5.80E-03 | 1821.5     | 1964.8     | 2370.9     | 1870.0      | 2205.4      | 2630.7      | 2198.8      | 1683.1  | 1508.9  | 1386.1  | 1593.5   | 1659.1   | 1436.6   | 1220.1   | 2198.8        | 1508.9     | 0.7         |
| 208769_at   | EIF4EBP2    | 5.19E-03 | 216.0      | 277.9      | 293.7      | 272.1       | 346.1       | 349.2       | 326.1       | 222.6   | 192.0   | 141.5   | 214.8    | 211.2    | 185.0    | 148.1    | 293.7         | 192.0      | 0.6         |
| 224645_at   | EIF4EBP2    | 3.14E-03 | 1242.1     | 1458.0     | 1504.9     | 1406.2      | 1688.0      | 1519.4      | 1417.1      | 1264.8  | 857.6   | 582.0   | 983.7    | 990.4    | 772.9    | 595.4    | 1458.0        | 857.6      | 0.6         |
| 224653_at   | EIF4EBP2    | 8.27E-04 | 732.4      | 632.9      | 716.9      | 768.7       | 894.8       | 880.8       | 701.7       | 626.4   | 387.5   | 306.1   | 492.1    | 553.0    | 429.1    | 332.3    | 732.4         | 429.1      | 0.6         |
| 201935_s_at | EIF4G3      | 1.76E-03 | 556.8      | 655.5      | 427.4      | 535.7       | 433.5       | 561.9       | 301.8       | 461.4   | 376.9   | 275.9   | 386.4    | 339.0    | 365.6    | 236.0    | 535.7         | 365.6      | 0.7         |
| 204513_s_at | ELMO1       | 2.19E-03 | 593.1      | 646.5      | 709.9      | 703.6       | 739.3       | 853.3       | 655.6       | 551.9   | 449.8   | 304.5   | 474.5    | 470.7    | 481.1    | 345.6    | 703.6         | 470.7      | 0.7         |
| 226502_at   | ELMOD2      | 1.16E-03 | 337.4      | 343.9      | 447.1      | 446.0       | 406.7       | 471.9       | 440.5       | 277.1   | 221.0   | 233.6   | 354.5    | 258.1    | 243.2    | 221.3    | 440.5         | 243.2      | 0.6         |
| 227075_at   | ELP3        | 3.23E-03 | 1270.0     | 1391.4     | 1446.9     | 1393.1      | 1412.1      | 1363.9      | 1231.9      | 1171.5  | 936.4   | 703.5   | 1145.5   | 900.8    | 889.5    | 713.8    | 1391.4        | 900.8      | 0.6         |
| 65635_at    | ENGASE      | 1.32E-03 | 505.8      | 527.1      | 429.3      | 288.3       | 310.8       | 477.1       | 346.6       | 402.9   | 334.9   | 228.4   | 182.1    | 244.5    | 278.0    | 266.2    | 429.3         | 266.2      | 0.6         |
| 220349_s_at | ENGASE      | 2.92E-03 | 588.3      | 622.8      | 587.9      | 361.4       | 386.5       | 671.2       | 436.3       | 526.3   | 355.9   | 285.3   | 224.1    | 344.9    | 340.4    | 243.0    | 587.9         | 340.4      | 0.6         |
| 204143_s_at | ENOSF1      | 5.40E-04 | 883.0      | 1451.4     | 1705.1     | 1399.7      | 965.9       | 867.8       | 1091.5      | 688.2   | 896.5   | 806.6   | 878.0    | 706.2    | 466.6    | 634.3    | 1091.5        | 706.2      | 0.6         |
| 204142_at   | ENOSF1      | 2.04E-03 | 541.9      | 968.2      | 1209.4     | 1004.6      | 706.9       | 591.8       | 959.5       | 541.9   | 691.7   | 656.0   | 630.0    | 395.3    | 332.9    | 521.0    | 959.5         | 541.9      | 0.6         |
| 213645_at   | ENOSF1      | 6.54E-04 | 342.1      | 435.3      | 942.4      | 704.3       | 657.3       | 668.6       | 480.0       | 293.1   | 226.1   | 371.8   | 421.4    | 327.3    | 279.0    | 167.1    | 657.3         | 293.1      | 0.4         |
| 209473_at   | ENTPD1      | 7.17E-03 | 365.7      | 424.8      | 395.7      | 506.8       | 446.7       | 479.4       | 440.2       | 353.1   | 268.1   | 188.0   | 472.7    | 309.3    | 268.4    | 263.3    | 440.2         | 268.4      | 0.6         |
| 200878_at   | EPAS1       | 2.09E-03 | 2390.7     | 2709.5     | 2865.2     | 3045.8      | 3221.2      | 3018.6      | 2949.7      | 2443.4  | 1582.7  | 1390.7  | 2083.1   | 1745.6   | 1648.6   | 1386.6   | 2949.7        | 1648.6     | 0.6         |
| 222066_at   | EPB41L1     | 1.91E-03 | 143.5      | 158.3      | 120.7      | 124.0       | 144.7       | 130.8       | 129.9       | 100.7   | 96.7    | 65.1    | 97.4     | 101.8    | 110.2    | 94.8     | 130.8         | 97.4       | 0.7         |
| 212339_at   | EPB41L1     | 2.67E-04 | 693.8      | 695.1      | 540.6      | 592.7       | 625.7       | 579.7       | 543.6       | 481.9   | 389.2   | 226.9   | 386.7    | 315.2    | 356.2    | 226.5    | 592.7         | 356.2      | 0.6         |
| 228259_s_at | EPB41L4A    | 5.61E-03 | 531.2      | 563.8      | 584.7      | 805.0       | 547.9       | 893.0       | 516.4       | 495.4   | 451.2   | 388.8   | 691.1    | 392.2    | 536.5    | 336.5    | 563.8         | 451.2      | 0.8         |
| 203463_s_at | EPN2        | 7.85E-03 | 124.1      | 125.3      | 131.0      | 121.9       | 138.7       | 147.5       | 138.9       | 104.0   | 115.0   | 92.3    | 85.6     | 109.5    | 94.0     | 119.8    | 131.0         | 104.0      | 0.8         |
| 203464_s_at | EPN2        | 1.94E-03 | 89.1       | 76.7       | 93.0       | 82.4        | 77.3        | 88.1        | 101.8       | 66.6    | 60.5    | 42.5    | 56.4     | 53.5     | 65.8     | 58.4     | 88.1          | 58.4       | 0.7         |
| 200843_s_at | EPRS        | 6.13E-03 | 1111.7     | 1064.9     | 977.0      | 1042.5      | 907.2       | 1003.5      | 1004.7      | 962.7   | 624.0   | 485.2   | 809.3    | 752.4    | 807.7    | 687.5    | 1004.7        | 752.4      | 0.7         |
| 200842_s_at | EPRS        | 5.68E-03 | 1275.2     | 1235.7     | 1051.7     | 1206.8      | 991.6       | 1155.9      | 1100.0      | 1162.1  | 881.2   | 592.6   | 936.8    | 847.4    | 861.3    | 680.3    | 1155.9        | 861.3      | 0.7         |
| 91826_at    | EPS8L1      | 4.74E-03 | 640.5      | 640.8      | 511.5      | 673.2       | 581.7       | 573.1       | 438.5       | 472.2   | 577.6   | 379.2   | 369.3    | 435.6    | 447.8    | 334.0    | 581.7         | 435.6      | 0.7         |
| 218779_x_at | EPS8L1      | 7.40E-03 | 390.9      | 403.0      | 325.5      | 415.1       | 344.2       | 347.8       | 280.5       | 289.8   | 336.4   | 250.7   | 255.2    | 246.6    | 293.4    | 257.0    | 347.8         | 257.0      | 0.7         |
| 221665_s_at | EPS8L1      | 6.86E-03 | 378.6      | 391.1      | 309.2      | 358.9       | 325.1       | 317.7       | 241.0       | 263.4   | 328.5   | 237.2   | 228.1    |          |          |          |               |            |             |

TRANSCRIPTION PROFILES IN ALVEOLAR MACROPHAGES

Supplementary Table S2. Continued.

| ID           | Gene Symbol | p-value  | VW3_Saline | VW6_Saline | VW7_Saline | VW13_Saline | VW22_Saline | VW23_Saline | VW25_Saline | VW3_LPS | VW6_LPS | VW7_LPS | VW13_LPS | VW22_LPS | VW23_LPS | VW25_LPS | Median_saline | Median_LPS | Fold change |
|--------------|-------------|----------|------------|------------|------------|-------------|-------------|-------------|-------------|---------|---------|---------|----------|----------|----------|----------|---------------|------------|-------------|
| 204774_at    | EV12A       | 1.76E-03 | 912.7      | 1293.2     | 1361.7     | 1402.5      | 1526.0      | 1541.1      | 1404.0      | 876.6   | 836.6   | 532.9   | 786.0    | 806.0    | 564.7    | 539.1    | 1402.5        | 786.0      | 0.6         |
| 211742_s_at  | EV12B       | 3.84E-03 | 2220.5     | 2626.0     | 3554.3     | 3005.3      | 3233.4      | 4191.3      | 3202.5      | 2219.4  | 1794.6  | 1191.3  | 1849.9   | 1890.5   | 1588.0   | 1141.0   | 3202.5        | 1794.6     | 0.6         |
| 208297_s_at  | EV15        | 7.92E-03 | 582.9      | 705.8      | 852.5      | 885.3       | 903.7       | 1037.6      | 862.5       | 575.4   | 551.6   | 562.1   | 741.7    | 627.3    | 783.4    | 511.4    | 862.5         | 575.4      | 0.7         |
| 209537_at    | EXTL2       | 4.47E-03 | 88.5       | 146.4      | 222.6      | 143.0       | 150.1       | 199.5       | 108.2       | 88.0    | 96.1    | 53.6    | 99.9     | 54.1     | 70.1     | 33.1     | 146.4         | 70.1       | 0.5         |
| 235978_at    | FABP4       | 4.99E-03 | 662.6      | 935.4      | 1011.9     | 955.5       | 623.9       | 441.5       | 1089.4      | 660.7   | 594.3   | 598.1   | 750.9    | 478.6    | 306.7    | 657.5    | 935.4         | 598.1      | 0.6         |
| 208962_s_at  | FADS1       | 8.59E-04 | 821.5      | 464.6      | 399.7      | 273.2       | 501.7       | 387.4       | 563.4       | 615.4   | 236.0   | 197.4   | 215.6    | 252.7    | 274.6    | 294.7    | 464.6         | 252.7      | 0.5         |
| 208964_s_at  | FADS1       | 4.30E-03 | 683.0      | 462.5      | 346.1      | 243.9       | 529.7       | 375.4       | 529.2       | 668.6   | 187.4   | 180.3   | 208.4    | 248.8    | 229.3    | 286.5    | 462.5         | 229.3      | 0.5         |
| 218080_x_at  | FAF1        | 3.10E-03 | 1388.1     | 1460.5     | 1291.6     | 1381.6      | 1343.3      | 1208.9      | 1217.8      | 1162.6  | 993.4   | 713.4   | 874.7    | 933.7    | 1111.2   | 779.3    | 1343.3        | 933.7      | 0.7         |
| 224217_s_at  | FAF1        | 1.89E-03 | 733.4      | 687.2      | 746.3      | 762.3       | 717.8       | 729.8       | 717.7       | 628.9   | 479.7   | 446.7   | 550.2    | 480.5    | 597.2    | 426.0    | 729.8         | 480.5      | 0.7         |
| 244650_at    | FAM105A     | 1.58E-03 | 726.4      | 592.1      | 700.9      | 637.0       | 518.6       | 752.1       | 501.8       | 533.0   | 335.6   | 202.9   | 431.2    | 341.4    | 392.4    | 214.3    | 637.0         | 341.4      | 0.5         |
| 223058_at    | FAM107B     | 8.57E-03 | 1800.8     | 1907.0     | 1699.8     | 1558.2      | 1790.5      | 1651.2      | 1943.5      | 1417.9  | 1422.8  | 1217.4  | 1409.5   | 1204.0   | 1571.8   | 1254.2   | 1790.5        | 1409.5     | 0.8         |
| 1553220_at   | FAM117B     | 6.50E-03 | 65.5       | 74.6       | 137.7      | 99.9        | 130.7       | 105.1       | 74.7        | 69.6    | 51.0    | 48.1    | 69.6     | 56.7     | 24.7     | 27.8     | 99.9          | 51.0       | 0.5         |
| 223386_at    | FAM118B     | 2.98E-03 | 1402.5     | 1507.1     | 1296.1     | 1525.0      | 1187.1      | 1590.9      | 1097.0      | 1256.2  | 1129.5  | 602.1   | 1134.2   | 762.0    | 1056.1   | 687.5    | 1402.5        | 1056.1     | 0.8         |
| 222129_at    | FAM134A     | 1.71E-03 | 957.8      | 904.6      | 1249.5     | 1185.4      | 1255.7      | 1449.8      | 1226.6      | 816.4   | 649.8   | 786.6   | 942.2    | 674.6    | 782.0    | 793.1    | 1226.6        | 786.6      | 0.6         |
| 215947_s_at  | FAM136A     | 8.90E-03 | 450.0      | 467.2      | 523.0      | 600.6       | 460.8       | 471.6       | 470.7       | 427.8   | 377.5   | 456.4   | 442.5    | 359.2    | 342.4    | 330.6    | 470.7         | 377.5      | 0.8         |
| 223203_at    | FAM156A     | 2.15E-03 | 944.9      | 1008.8     | 1136.0     | 934.5       | 877.1       | 1129.0      | 828.1       | 735.1   | 592.1   | 333.4   | 552.8    | 649.5    | 584.4    | 433.6    | 944.9         | 584.4      | 0.6         |
| /// FAM156B  |             |          |            |            |            |             |             |             |             |         |         |         |          |          |          |          |               |            |             |
| 205308_at    | FAM164A     | 3.67E-03 | 277.3      | 246.4      | 284.8      | 269.4       | 345.8       | 346.5       | 237.5       | 286.0   | 158.6   | 153.4   | 195.7    | 236.7    | 211.5    | 149.3    | 277.3         | 195.7      | 0.7         |
| 241808_at    | FAM164A     | 5.44E-03 | 70.7       | 88.0       | 127.4      | 96.7        | 128.1       | 145.3       | 119.2       | 65.1    | 74.0    | 51.4    | 67.3     | 50.6     | 40.3     | 44.4     | 119.2         | 51.4       | 0.4         |
| 228239_at    | FAM165B     | 7.99E-04 | 496.0      | 652.9      | 524.3      | 411.9       | 461.8       | 568.3       | 443.6       | 414.8   | 401.1   | 249.5   | 273.7    | 323.4    | 301.4    | 247.2    | 496.0         | 301.4      | 0.6         |
| 203482_at    | FAM178A     | 1.06E-03 | 987.8      | 943.0      | 888.4      | 923.9       | 836.0       | 870.3       | 733.9       | 794.7   | 572.4   | 341.2   | 619.0    | 545.7    | 507.6    | 385.0    | 888.4         | 545.7      | 0.6         |
| 217896_s_at  | FAM192A     | 8.97E-03 | 313.4      | 303.2      | 360.0      | 350.1       | 374.3       | 413.3       | 309.7       | 339.2   | 219.5   | 252.4   | 280.3    | 253.2    | 261.0    | 213.5    | 350.1         | 253.2      | 0.7         |
| 227194_at    | FAM3B       | 5.49E-03 | 1561.6     | 3380.3     | 1484.5     | 3615.6      | 2427.2      | 2338.8      | 1501.9      | 1417.8  | 2757.3  | 1035.9  | 3061.0   | 1824.9   | 1721.5   | 969.4    | 2338.8        | 1721.5     | 0.7         |
| 203206_at    | FAM53B      | 1.55E-03 | 244.1      | 183.4      | 239.0      | 230.7       | 233.3       | 261.7       | 213.2       | 170.6   | 143.8   | 94.9    | 165.2    | 149.6    | 144.4    | 94.1     | 233.3         | 144.4      | 0.6         |
| 228069_at    | FAM54A      | 6.35E-03 | 122.0      | 135.4      | 189.8      | 200.4       | 176.3       | 256.7       | 162.0       | 128.4   | 102.6   | 81.1    | 150.0    | 71.1     | 105.8    | 56.7     | 176.3         | 102.6      | 0.6         |
| 45749_at     | FAM65A      | 4.68E-03 | 427.6      | 348.2      | 411.5      | 439.1       | 381.4       | 373.1       | 389.8       | 321.0   | 250.4   | 267.8   | 288.7    | 334.0    | 346.0    | 251.6    | 389.8         | 288.7      | 0.7         |
| 218126_at    | FAM82A2     | 4.37E-03 | 2641.5     | 2492.9     | 2026.4     | 1867.2      | 2164.8      | 1899.3      | 1914.5      | 2200.4  | 1899.3  | 1561.2  | 1642.4   | 1744.7   | 1391.3   | 1350.0   | 2026.4        | 1642.4     | 0.8         |
| 222665_at    | FAM82B      | 4.01E-03 | 235.4      | 244.0      | 224.0      | 246.3       | 260.0       | 266.0       | 248.6       | 199.3   | 140.5   | 99.5    | 184.0    | 225.2    | 174.6    | 128.4    | 246.3         | 174.6      | 0.7         |
| 226448_at    | FAM89A      | 1.87E-03 | 2640.4     | 2689.3     | 2926.0     | 3230.6      | 2741.8      | 3420.4      | 3623.7      | 2153.8  | 2287.6  | 2003.8  | 2297.2   | 1502.1   | 2239.7   | 2115.5   | 2926.0        | 2153.8     | 0.7         |
| 224779_s_at  | FAM96A      | 1.45E-03 | 2063.0     | 2242.5     | 2593.1     | 2662.5      | 2350.5      | 2559.8      | 2525.4      | 1643.9  | 1806.1  | 1656.0  | 1960.3   | 1548.2   | 1426.8   | 1322.6   | 2525.4        | 1643.9     | 0.7         |
| 220255_at    | FANCE       | 2.34E-03 | 215.7      | 127.8      | 131.4      | 132.4       | 132.0       | 124.4       | 121.6       | 142.8   | 79.2    | 87.8    | 83.1     | 95.4     | 106.1    | 106.2    | 131.4         | 95.4       | 0.7         |
| 201910_at    | FARP1       | 4.03E-03 | 911.6      | 867.1      | 573.8      | 756.0       | 664.8       | 529.5       | 499.5       | 751.9   | 478.2   | 345.5   | 519.2    | 526.7    | 450.6    | 386.3    | 664.8         | 478.2      | 0.7         |
| 209696_at    | FBP1        | 7.26E-04 | 4757.5     | 4468.2     | 3759.0     | 4369.1      | 3455.9      | 3873.2      | 3233.5      | 3855.9  | 3193.9  | 1983.6  | 3016.4   | 2224.4   | 2631.3   | 2006.6   | 3873.2        | 2631.3     | 0.7         |
| 225704_at    | FBRSL1      | 9.10E-03 | 110.5      | 75.0       | 129.6      | 133.1       | 139.5       | 130.5       | 121.1       | 109.4   | 61.1    | 65.3    | 108.8    | 103.6    | 68.8     | 66.3     | 129.6         | 68.8       | 0.5         |
| 227500_at    | FBXL18      | 7.50E-03 | 140.7      | 138.0      | 123.3      | 160.3       | 171.5       | 132.2       | 151.6       | 117.8   | 71.0    | 94.6    | 122.2    | 103.2    | 126.8    | 99.0     | 140.7         | 103.2      | 0.7         |
| 235089_at    | FBXL20      | 4.50E-03 | 158.9      | 218.0      | 285.3      | 255.6       | 237.6       | 275.4       | 182.9       | 173.2   | 130.3   | 163.9   | 182.6    | 160.0    | 156.2    | 93.2     | 237.6         | 160.0      | 0.7         |
| 1558062_at   | FBXO10      | 4.91E-03 | 186.4      | 178.2      | 175.3      | 209.7       | 176.1       | 190.9       | 207.6       | 188.2   | 74.1    | 73.6    | 153.0    | 108.8    | 131.7    | 81.2     | 186.4         | 108.8      | 0.6         |
| 227222_at    | FBXO10      | 1.89E-03 | 133.3      | 129.2      | 184.2      | 214.0       | 192.0       | 209.0       | 169.5       | 123.3   | 102.6   | 99.9    | 126.5    | 103.9    | 118.0    | 79.8     | 184.2         | 103.9      | 0.6         |
| 44040_at     | FBXO41      | 1.21E-03 | 178.3      | 217.5      | 230.2      | 257.4       | 191.0       | 201.9       | 195.8       | 144.0   | 167.6   | 144.4   | 188.2    | 125.9    | 144.4    | 148.7    | 201.9         | 144.4      | 0.7         |
| 208647_at    | FDFT1       | 2.30E-03 | 6814.7     | 7694.5     | 4865.1     | 5411.7      | 6394.6      | 5781.5      | 6058.0      | 5930.4  | 5668.7  | 2816.6  | 4375.6   | 4104.4   | 4177.7   | 4099.3   | 6058.0        | 4177.7     | 0.7         |
| 210950_s_at  | FDFT1       | 1.49E-03 | 3000.6     | 3171.4     | 1549.7     | 1629.8      | 2473.3      | 1932.5      | 1965.5      | 2482.6  | 1767.9  | 742.6   | 1296.2   | 1522.4   | 1305.6   | 1273.3   | 1965.5        | 1305.6     | 0.7         |
| 207813_s_at  | FDXR        | 3.38E-03 | 366.1      | 360.1      | 504.5      | 375.9       | 347.4       | 412.9       | 394.3       | 293.2   | 231.3   | 163.0   | 267.3    | 233.3    | 274.0    | 188.4    | 375.9         | 233.3      | 0.6         |
| 203115_at    | FECH        | 5.62E-03 | 287.4      | 300.4      | 465.1      | 339.6       | 376.2       | 624.5       | 352.1       | 262.5   | 236.0   | 333.5   | 274.9    | 292.7    | 348.2    | 213.0    | 352.1         | 274.9      | 0.8         |
| 205418_at    | FES         | 9.10E-03 | 144.2      | 130.5      | 243.1      | 197.2       | 164.1       | 167.1       | 155.1       | 127.0   | 69.1    | 77.6    | 108.4    | 158.4    | 117.8    | 84.9     | 164.1         | 108.4      | 0.7         |
| 226985_at    | FGD5        | 4.16E-03 | 847.0      | 911.6      | 903.5      | 1039.1      | 980.8       | 914.3       | 978.1       | 803.9   | 678.5   | 507.9   | 809.0    | 624.5    | 693.7    | 584.9    | 914.3         | 678.5      | 0.7         |
| 201540_at    | FHL1        | 4.17E-04 | 2934.1     | 3566.6     | 3746.8     | 3258.9      | 3255.7      | 4302.3      | 3046.6      | 2230.7  | 2296.8  | 1466.6  | 1970.2   | 1535.9   | 1987.9   | 1232.2   | 3258.9        | 1970.2     | 0.6         |
| 210298_x_at  | FHL1        | 3.41E-04 | 406.3      | 428.6      | 309.2      | 308.6       | 273.4       | 332.8       | 255.9       | 287.9   | 247.7   | 119.8   | 171.3    | 182.3    | 196.4    | 121.6    | 309.2         | 182.3      | 0.6         |
| 210299_s_at  | FHL1        | 1.29E-03 | 450.7      | 564.0      | 482.1      | 491.6       | 506.1       | 623.2       | 439.0       | 418.4   | 312.2   | 163.1   | 288.6    | 229.6    | 322.1    | 159.4    | 491.6         | 288.6      | 0.6         |
| 201539_s_at  | FHL1        | 9.83E-04 | 296.5      | 281.7      | 306.9      | 295.5       | 288.4       | 335.1       | 253.6       | 255.8   | 162.1   | 127.4   | 171.3    | 196.9    | 198.0    | 123.3    | 295.5         | 171.3      | 0.6         |
| 214505_s_at  | FHL1        | 2.55E-04 | 638.1      | 590.4      | 494.0      | 514.1       | 441.1       | 535.6       | 409.9       | 395.4   | 351.1   | 176.3   | 273.5    | 283.3    | 322.3    | 210.2    | 514.1         | 283.3      | 0.6         |
| 203656_at    | FIG4        | 1.08E-03 | 1247.6     | 1496.0     | 1544.8     | 1264.3      | 1489.3      | 1538.2      | 1204.2      | 1011.1  | 847.0   | 486.7   | 770.6    | 891.6    | 715.2    | 459.9    | 1489.3        | 770.6      | 0.5         |
| 200894_s_at  | FKBP4       | 1.64E-03 | 568.3      | 477.3      | 778.3      | 624.3       | 505.5       | 573.0       | 543.4       | 397.8   | 383.3   | 452.7   | 351.7    | 400.5    | 384.1    | 421.2    | 568.3         | 397.8      | 0.7         |
| 200895_s_at  | FKBP4       | 5.70E-04 | 1199.6     | 1223.1     | 1492.4     | 1064.7      | 1121.9      | 1191.1      | 1077.6      | 933.3   | 832.1   | 874.6   | 731.6    | 834.7    | 721.4    | 749.2    | 1191.1        | 832.1      | 0.7         |
| 212169_at    | FKBP9       | 1.06E-03 | 1297.9     | 1620.3     | 1428.9     | 1262.6      | 1379.0      | 1291.1      | 1264.1      | 1006.5  | 1076.7  | 675.3   | 967.5    | 919.9    | 859.8    | 725.0    | 1297.9        | 919.9      | 0.7         |
| 204236_at    | FLI1        | 1.34E-03 | 638.5      | 726.6      | 813.4      | 853.7       | 772.0       | 950.3       | 707.9       | 535.3   | 465.4   | 250.1   | 521.2    | 384.1    | 377.7    | 350.0    | 772.0         | 384.1      | 0.5         |
| 223845_at    | FLJ20674    | 4.13E-03 | 82.2       | 56.9       | 65.8       | 60.0        | 57.1        | 60.1        | 58.7        | 53.3    | 50.8    | 36.7    | 34.6     | 45.1     | 44.0     | 48.4     | 60.0          | 45.1       | 0.8         |
| 1553991_s_at | FLJ20674    | 6.89E-04 | 381.2      | 329.8      | 488.0      | 346.8       | 329.4       | 391.4       | 305.6       | 286.8   | 236.0   | 174.4   | 199.9    | 166.9    | 181.8    | 166.6    | 346.8         | 181.8      | 0.5         |
| 1564208_x_at | FLJ35390    | 4.22E-03 | 164.5      | 223.3      | 205.1      | 177.9       | 151.4       | 175.8       | 132.4       | 142.0   | 147.7   | 84.6    | 141.0    | 109.7    | 115.9    | 83.3     | 175.8         | 115.9      | 0.7         |
| 1564207_at   | FLJ35390    | 8.53E-03 | 217.3      | 317.1      | 286.2      | 23          |             |             |             |         |         |         |          |          |          |          |               |            |             |

Supplementary Table S2. Continued.

| ID            | Gene Symbol | p-value  | VW3_Saline | VW6_Saline | VW7_Saline | VW13_Saline | VW22_Saline | VW23_Saline | VW25_Saline | VW3_LPS | VW6_LPS | VW7_LPS | VW13_LPS | VW22_LPS | VW23_LPS | VW25_LPS | Median_saline | Median_LPS | Fold change |
|---------------|-------------|----------|------------|------------|------------|-------------|-------------|-------------|-------------|---------|---------|---------|----------|----------|----------|----------|---------------|------------|-------------|
| 231407_s_at   | FOXH1       | 8.61E-03 | 159.8      | 162.5      | 169.4      | 123.2       | 144.7       | 157.7       | 129.9       | 140.3   | 96.9    | 94.0    | 95.4     | 121.7    | 139.4    | 93.4     | 157.7         | 96.9       | 0.6         |
| 202724_s_at   | FOXO1       | 1.10E-03 | 459.9      | 721.5      | 524.1      | 527.0       | 613.5       | 559.2       | 404.5       | 361.7   | 312.8   | 225.7   | 386.9    | 421.0    | 246.0    | 171.0    | 527.0         | 312.8      | 0.6         |
| 219889_at     | FRAT1       | 4.15E-03 | 145.2      | 138.1      | 174.6      | 172.4       | 154.6       | 189.9       | 137.4       | 144.1   | 64.6    | 47.2    | 88.1     | 118.3    | 91.5     | 63.1     | 154.6         | 88.1       | 0.6         |
| 209864_at     | FRAT2       | 7.82E-03 | 475.2      | 332.9      | 536.3      | 478.0       | 431.0       | 472.9       | 395.6       | 387.9   | 240.3   | 126.7   | 308.6    | 290.6    | 297.0    | 195.2    | 472.9         | 290.6      | 0.6         |
| 225167_at     | FRMD4A      | 2.93E-03 | 2233.4     | 2328.1     | 1792.4     | 2000.8      | 1789.5      | 2128.6      | 1773.7      | 1915.4  | 1410.8  | 947.9   | 1527.5   | 1448.2   | 1529.2   | 963.9    | 2000.8        | 1448.2     | 0.7         |
| 225163_at     | FRMD4A      | 2.02E-03 | 1069.4     | 1391.8     | 1015.6     | 1166.7      | 1224.8      | 1226.1      | 1147.7      | 886.1   | 803.1   | 488.4   | 970.8    | 646.8    | 778.3    | 463.2    | 1166.7        | 778.3      | 0.7         |
| 225168_at     | FRMD4A      | 1.07E-03 | 1065.3     | 1086.5     | 903.5      | 1052.0      | 1034.9      | 1052.1      | 885.8       | 892.6   | 663.3   | 501.8   | 833.1    | 673.7    | 693.7    | 502.8    | 1052.0        | 673.7      | 0.6         |
| 204072_s_at   | FRY         | 3.78E-03 | 115.5      | 151.4      | 196.3      | 240.3       | 269.9       | 330.1       | 217.7       | 126.9   | 77.8    | 110.0   | 169.1    | 116.7    | 128.2    | 85.2     | 217.7         | 116.7      | 0.5         |
| 228410_at     | GAB3        | 3.63E-03 | 367.4      | 446.7      | 415.3      | 409.2       | 437.8       | 456.3       | 349.3       | 336.4   | 302.3   | 278.8   | 348.1    | 328.0    | 321.1    | 240.0    | 415.3         | 321.1      | 0.8         |
| 208868_s_at   | GABARAPL1   | 1.53E-03 | 863.2      | 969.0      | 721.2      | 960.3       | 875.1       | 1094.5      | 694.9       | 746.3   | 740.5   | 520.0   | 675.9    | 574.1    | 626.4    | 460.8    | 875.1         | 626.4      | 0.7         |
| 208869_s_at   | GABARAPL1   | 2.07E-03 | 653.7      | 816.2      | 629.9      | 788.9       | 754.5       | 925.4       | 649.3       | 587.5   | 570.8   | 350.2   | 615.6    | 462.1    | 469.6    | 327.8    | 754.5         | 469.6      | 0.6         |
| 211458_s_at   | GABARAPL1   | 5.16E-03 | 8273.3     | 10129.2    | 7894.7     | 9349.6      | 9531.1      | 10365.5     | 7677.2      | 7976.7  | 7952.0  | 5151.1  | 7794.0   | 6408.4   | 6553.6   | 4576.5   | 9349.6        | 6553.6     | 0.7         |
| /// GABARAPL3 |             |          |            |            |            |             |             |             |             |         |         |         |          |          |          |          |               |            |             |
| 211810_s_at   | GALC        | 5.77E-03 | 720.8      | 975.7      | 1102.0     | 856.3       | 1330.7      | 1167.1      | 1181.5      | 683.0   | 726.9   | 540.6   | 704.5    | 926.5    | 796.1    | 732.3    | 1102.0        | 726.9      | 0.7         |
| 204417_at     | GALC        | 1.42E-03 | 712.9      | 862.8      | 1187.3     | 909.9       | 1239.7      | 1089.6      | 1326.3      | 638.3   | 575.0   | 640.0   | 637.6    | 822.2    | 682.4    | 659.4    | 1089.6        | 640.0      | 0.6         |
| 234974_at     | GALM        | 3.71E-03 | 209.1      | 252.7      | 205.8      | 172.3       | 166.9       | 106.2       | 128.2       | 165.0   | 167.6   | 123.0   | 148.6    | 110.5    | 72.0     | 113.3    | 172.3         | 123.0      | 0.7         |
| 212256_at     | GALNT10     | 7.93E-03 | 243.0      | 343.4      | 262.0      | 299.4       | 280.8       | 301.5       | 265.4       | 240.0   | 193.1   | 159.0   | 273.1    | 194.5    | 220.2    | 156.0    | 280.8         | 194.5      | 0.7         |
| 204457_s_at   | GAS1        | 6.09E-03 | 48.8       | 72.1       | 86.5       | 61.4        | 64.8        | 45.5        | 36.5        | 39.3    | 42.0    | 26.3    | 46.2     | 25.3     | 16.5     | 32.0     | 61.4          | 32.0       | 0.5         |
| 235709_at     | GAS2L3      | 1.53E-03 | 679.5      | 574.6      | 473.7      | 530.2       | 536.8       | 480.8       | 435.8       | 523.4   | 411.2   | 297.6   | 304.8    | 405.9    | 360.8    | 207.5    | 530.2         | 360.8      | 0.7         |
| 238756_at     | GAS2L3      | 3.66E-03 | 390.6      | 321.7      | 523.1      | 486.2       | 521.2       | 518.0       | 533.3       | 275.4   | 260.6   | 372.3   | 359.5    | 221.6    | 227.1    | 179.9    | 518.0         | 260.6      | 0.5         |
| 225393_at     | GATAD2B     | 8.83E-03 | 311.1      | 433.3      | 544.5      | 505.1       | 478.8       | 628.2       | 450.6       | 320.6   | 299.3   | 338.2   | 459.5    | 318.0    | 345.4    | 289.4    | 478.8         | 320.6      | 0.7         |
| 204867_at     | GCHFR       | 8.89E-03 | 785.4      | 503.4      | 644.9      | 543.2       | 438.6       | 465.2       | 573.0       | 386.5   | 231.8   | 215.9   | 231.7    | 485.3    | 456.4    | 196.2    | 543.2         | 231.8      | 0.4         |
| 226214_at     | GDE1        | 6.66E-03 | 893.5      | 1224.2     | 976.0      | 864.2       | 921.9       | 1047.1      | 745.7       | 912.0   | 762.3   | 402.7   | 671.2    | 672.3    | 634.4    | 387.4    | 921.9         | 671.2      | 0.7         |
| 202593_s_at   | GDE1        | 3.98E-03 | 1100.8     | 1206.2     | 1127.8     | 991.9       | 941.4       | 1027.5      | 861.6       | 1015.3  | 793.3   | 497.4   | 747.3    | 712.0    | 642.1    | 510.1    | 1027.5        | 712.0      | 0.7         |
| 219821_s_at   | GFOD1       | 7.59E-03 | 130.0      | 125.4      | 177.0      | 163.7       | 164.9       | 187.8       | 194.9       | 129.4   | 90.2    | 83.0    | 121.5    | 122.1    | 124.7    | 85.1     | 164.9         | 121.5      | 0.7         |
| 210658_s_at   | GGA2        | 7.55E-03 | 2017.0     | 2574.1     | 2180.3     | 2058.3      | 2017.6      | 2483.4      | 2046.1      | 2026.3  | 1683.8  | 1023.5  | 1718.2   | 1381.5   | 1785.0   | 1126.7   | 2058.3        | 1683.8     | 0.8         |
| 213772_s_at   | GGA2        | 3.23E-03 | 3563.3     | 4963.6     | 4117.6     | 3816.8      | 3430.3      | 4636.4      | 3730.4      | 3059.4  | 3219.0  | 1785.0  | 3110.6   | 2410.2   | 2997.2   | 1948.7   | 3816.8        | 2997.2     | 0.8         |
| 208913_at     | GGA2        | 4.65E-03 | 4050.0     | 4959.1     | 4726.3     | 4609.4      | 4164.4      | 5505.4      | 4882.0      | 3557.8  | 3941.1  | 2265.5  | 3888.6   | 2699.0   | 3585.4   | 2761.2   | 4726.3        | 3557.8     | 0.8         |
| 214190_x_at   | GGA2        | 1.02E-03 | 1562.2     | 1710.5     | 1453.6     | 1468.4      | 1289.0      | 1706.1      | 1375.6      | 1226.0  | 1030.9  | 583.7   | 1027.5   | 840.7    | 1074.5   | 726.8    | 1468.4        | 1027.5     | 0.7         |
| 208915_s_at   | GGA2        | 9.62E-04 | 1029.7     | 1016.7     | 912.6      | 939.1       | 728.0       | 1054.6      | 841.8       | 681.6   | 542.8   | 337.7   | 614.8    | 551.1    | 690.1    | 433.3    | 939.1         | 551.1      | 0.6         |
| 208914_at     | GGA2        | 9.01E-04 | 1627.3     | 1900.0     | 1598.3     | 1816.3      | 1506.9      | 1880.4      | 1650.4      | 1216.4  | 958.6   | 415.7   | 1097.6   | 755.8    | 1013.1   | 640.1    | 1650.4        | 958.6      | 0.6         |
| 228376_at     | GGA2        | 1.72E-03 | 820.0      | 1189.7     | 1614.8     | 1460.2      | 1840.0      | 1977.0      | 1324.5      | 766.4   | 748.5   | 691.0   | 932.1    | 1164.2   | 1004.4   | 569.9    | 1460.2        | 766.4      | 0.5         |
| 1552316_a_at  | GIMAP1      | 6.78E-03 | 890.7      | 1248.9     | 1366.9     | 1379.3      | 1289.5      | 1339.7      | 838.9       | 851.0   | 663.3   | 280.9   | 964.2    | 799.7    | 583.4    | 395.7    | 1289.5        | 663.3      | 0.5         |
| 229367_s_at   | GIMAP6      | 8.56E-03 | 288.0      | 241.3      | 261.9      | 322.7       | 289.1       | 233.1       | 184.3       | 303.6   | 133.3   | 90.3    | 273.4    | 170.4    | 145.8    | 95.1     | 261.9         | 145.8      | 0.6         |
| 219777_at     | GIMAP6      | 4.34E-03 | 142.1      | 137.0      | 157.7      | 202.6       | 148.9       | 157.2       | 121.8       | 128.5   | 102.8   | 48.0    | 143.6    | 78.8     | 78.5     | 59.5     | 148.9         | 78.8       | 0.5         |
| 213552_at     | GLCE        | 8.30E-03 | 285.7      | 545.3      | 582.3      | 449.4       | 470.6       | 730.5       | 456.5       | 355.1   | 287.0   | 139.8   | 315.2    | 240.6    | 265.6    | 170.8    | 470.6         | 265.6      | 0.6         |
| 225918_at     | GLG1        | 9.37E-03 | 486.0      | 364.9      | 448.9      | 592.1       | 574.2       | 528.1       | 630.8       | 492.9   | 237.9   | 273.1   | 451.0    | 501.9    | 391.8    | 380.4    | 528.1         | 391.8      | 0.7         |
| 225602_at     | GLIPR2      | 6.74E-03 | 2815.7     | 2838.4     | 2258.6     | 2282.6      | 2275.4      | 2519.2      | 2089.7      | 2372.4  | 2038.2  | 1430.8  | 1808.7   | 1765.5   | 2345.8   | 1570.0   | 2282.6        | 1808.7     | 0.8         |
| 209276_s_at   | GLRX        | 4.99E-03 | 4559.2     | 4390.8     | 4009.7     | 4667.8      | 4343.0      | 4375.7      | 4369.8      | 4686.9  | 3151.4  | 2621.5  | 3234.2   | 3130.7   | 3252.7   | 2916.6   | 4375.7        | 3151.4     | 0.7         |
| 218473_s_at   | GLT2SD1     | 6.22E-03 | 828.1      | 771.4      | 845.4      | 1016.3      | 747.3       | 790.6       | 908.8       | 781.6   | 457.0   | 554.6   | 724.1    | 624.4    | 658.5    | 578.2    | 828.1         | 624.4      | 0.8         |
| 217202_s_at   | GLUL        | 9.61E-03 | 3897.8     | 4441.3     | 3390.6     | 4303.1      | 2844.7      | 3522.5      | 2456.0      | 2695.6  | 2617.3  | 1434.7  | 3053.1   | 3102.6   | 2693.1   | 1456.0   | 3522.5        | 2693.1     | 0.8         |
| 200648_s_at   | GLUL        | 4.97E-03 | 7349.9     | 7389.1     | 5622.0     | 7583.5      | 5506.1      | 6380.2      | 4357.7      | 5755.8  | 4674.5  | 2592.9  | 5558.1   | 5171.4   | 4451.5   | 2863.4   | 6380.2        | 4674.5     | 0.7         |
| 235678_at     | GM2A        | 3.97E-03 | 822.9      | 883.4      | 784.8      | 752.9       | 776.4       | 541.3       | 778.7       | 656.1   | 768.3   | 563.0   | 640.0    | 586.9    | 377.8    | 583.7    | 778.7         | 586.9      | 0.8         |
| 217990_at     | GMPR2       | 5.99E-03 | 496.3      | 556.5      | 727.0      | 621.2       | 666.7       | 846.6       | 701.3       | 477.0   | 429.2   | 428.6   | 509.8    | 474.9    | 485.6    | 350.2    | 666.7         | 474.9      | 0.7         |
| 224863_at     | GNAQ        | 2.50E-03 | 1552.4     | 1668.7     | 1807.3     | 1827.8      | 1927.4      | 2057.6      | 2154.0      | 1409.5  | 1340.4  | 1065.3  | 1338.6   | 1116.1   | 1337.6   | 1187.0   | 1827.8        | 1337.6     | 0.7         |
| 202615_at     | GNAQ        | 1.08E-03 | 1034.7     | 1112.5     | 1533.4     | 1468.4      | 1519.9      | 1640.0      | 1381.9      | 874.8   | 788.2   | 795.0   | 1070.2   | 902.8    | 879.8    | 882.1    | 1468.4        | 879.8      | 0.6         |
| 224861_at     | GNAQ        | 4.42E-03 | 169.2      | 131.8      | 270.7      | 275.0       | 322.7       | 333.0       | 242.5       | 174.2   | 103.0   | 125.8   | 190.9    | 164.1    | 158.5    | 114.7    | 270.7         | 158.5      | 0.6         |
| 235139_at     | GNGT2       | 1.57E-03 | 148.2      | 139.5      | 174.8      | 180.6       | 129.5       | 221.1       | 126.8       | 103.6   | 95.0    | 93.3    | 136.0    | 113.5    | 145.5    | 75.4     | 148.2         | 103.6      | 0.7         |
| 208798_x_at   | GOLGA8A     | 8.16E-03 | 294.6      | 673.5      | 774.2      | 382.6       | 604.1       | 423.1       | 374.7       | 322.5   | 421.8   | 559.7   | 307.6    | 360.3    | 280.8    | 214.5    | 423.1         | 322.5      | 0.8         |
| 201056_at     | GOLGB1      | 9.54E-03 | 114.7      | 146.5      | 118.9      | 127.5       | 132.1       | 136.6       | 118.2       | 112.7   | 122.0   | 98.7    | 81.0     | 93.4     | 85.8     | 91.9     | 127.5         | 93.4       | 0.7         |
| 204324_s_at   | GOLIM4      | 7.94E-04 | 5130.6     | 4630.7     | 4723.3     | 5090.4      | 4321.5      | 4074.7      | 3743.0      | 3851.7  | 3436.5  | 2282.1  | 3295.8   | 2830.4   | 2897.1   | 2269.8   | 4630.7        | 2897.1     | 0.6         |
| 218361_at     | GOLPH3L     | 6.53E-03 | 495.3      | 753.8      | 795.2      | 657.3       | 778.9       | 778.7       | 736.5       | 489.5   | 618.4   | 378.5   | 536.0    | 413.1    | 411.5    | 358.6    | 753.8         | 413.1      | 0.5         |
| 200708_at     | GOT2        | 3.48E-03 | 610.9      | 611.9      | 708.1      | 639.6       | 667.1       | 609.7       | 608.8       | 517.6   | 512.9   | 498.8   | 534.1    | 424.5    | 445.1    | 411.8    | 611.9         | 498.8      | 0.8         |
| 205929_at     | GPA33       | 1.02E-03 | 592.6      | 796.6      | 184.4      | 706.7       | 409.4       | 1091.7      | 378.3       | 522.0   | 462.5   | 62.4    | 397.2    | 194.1    | 449.4    | 122.6    | 796.6         | 397.2      | 0.7         |
| 225420_at     | GPAM        | 3.23E-03 | 95.8       | 114.0      | 167.6      | 177.1       | 152.5       | 173.5       | 164.9       | 94.3    | 74.5    | 90.8    | 126.4    | 74.9     | 114.5    | 71.4     | 164.9         | 90.8       | 0.6         |
| 1552501_a_at  | GPBAR1      | 1.17E-03 | 123.0      | 135.2      | 143.5      | 191.9       | 171.2       | 158.3       | 149.9       | 72.9    | 96.8    | 85.8    | 128.3    | 152.0    | 109.6    | 83.0     | 149.9         | 96.8       | 0.6         |
| 204997_at     | GPD1        | 1.22E-03 | 564.3      | 499.5      | 587.3      | 468.8       | 383.0       | 525.9       | 465.2       | 408.8   | 330.5   | 288.2   | 280.0    | 290.8    | 419.7    | 246.1    | 499.5         | 290.8      | 0.6         |
| 213706_at     | GPD1        | 4.57E-04 | 814.5      | 1157.0     | 1027.1     | 833.2       | 768.8       | 1158.0      | 882.4       | 636.1   | 581.7   | 384.4   | 493.2    | 318.9    | 662.5    | 316.9    | 882.4         | 493.2      | 0.6         |
| 1563035_x_at  | GPD1        | 2.95E-04 | 517.3      | 629.9      | 572.6      | 401.6       | 287.3       |             |             |         |         |         |          |          |          |          |               |            |             |



TRANSCRIPTION PROFILES IN ALVEOLAR MACROPHAGES

Supplementary Table S2. Continued.

| ID           | Gene Symbol | p-value  | VW3_Saline | VW6_Saline | VW7_Saline | VW13_Saline | VW22_Saline | VW23_Saline | VW25_Saline | VW3_LPS | VW6_LPS | VW7_LPS | VW13_LPS | VW22_LPS | VW23_LPS | VW25_LPS | Median_saline | Median_LPS | Fold change |
|--------------|-------------|----------|------------|------------|------------|-------------|-------------|-------------|-------------|---------|---------|---------|----------|----------|----------|----------|---------------|------------|-------------|
| 1556698_a_at | GPRIN3      | 3.12E-03 | 397.3      | 468.0      | 556.7      | 569.1       | 590.5       | 684.0       | 733.9       | 377.5   | 274.3   | 247.5   | 459.8    | 292.9    | 321.1    | 262.9    | 569.1         | 292.9      | 0.5         |
| 212906_at    | GRAMD1B     | 4.73E-03 | 113.7      | 115.2      | 153.6      | 166.6       | 157.7       | 205.8       | 124.4       | 115.7   | 65.6    | 90.1    | 127.0    | 118.3    | 102.4    | 75.9     | 153.6         | 102.4      | 0.7         |
| 212856_at    | GRAMD4      | 1.09E-03 | 104.7      | 134.8      | 150.1      | 150.2       | 151.3       | 132.1       | 135.2       | 79.8    | 80.2    | 50.2    | 97.9     | 99.1     | 65.5     | 72.5     | 135.2         | 79.8       | 0.6         |
| 229397_s_at  | GRLF1       | 5.71E-03 | 245.0      | 312.8      | 342.0      | 449.8       | 379.5       | 407.7       | 279.0       | 267.4   | 222.8   | 182.2   | 293.2    | 227.9    | 235.5    | 202.2    | 342.0         | 227.9      | 0.7         |
| 229394_s_at  | GRLF1       | 1.50E-03 | 544.1      | 531.9      | 514.7      | 587.1       | 590.0       | 578.4       | 439.6       | 455.3   | 381.6   | 272.0   | 446.7    | 338.0    | 325.3    | 313.3    | 544.1         | 338.0      | 0.6         |
| 226183_at    | GSK3B       | 5.11E-03 | 141.8      | 144.4      | 167.7      | 179.9       | 190.5       | 210.7       | 217.0       | 135.4   | 115.0   | 103.5   | 144.3    | 118.8    | 107.8    | 110.7    | 179.9         | 115.0      | 0.6         |
| 234975_at    | GSPT1       | 5.66E-03 | 246.0      | 286.2      | 277.3      | 300.7       | 313.3       | 329.1       | 329.5       | 215.5   | 200.1   | 233.3   | 269.4    | 204.2    | 228.2    | 210.0    | 300.7         | 215.5      | 0.7         |
| 1554518_at   | GSTCD       | 1.72E-03 | 70.4       | 80.8       | 65.8       | 89.4        | 86.3        | 69.3        | 64.4        | 52.1    | 56.4    | 39.2    | 53.7     | 47.2     | 54.6     | 54.4     | 70.4          | 53.7       | 0.8         |
| 210912_x_at  | GSTM4       | 1.00E-03 | 193.0      | 409.7      | 369.3      | 195.4       | 274.2       | 255.6       | 322.3       | 150.8   | 235.8   | 146.6   | 117.9    | 201.6    | 143.0    | 136.6    | 274.2         | 146.6      | 0.5         |
| 218412_s_at  | GTF2IRD1    | 6.33E-03 | 108.0      | 104.9      | 108.4      | 105.4       | 91.7        | 91.1        | 119.1       | 90.5    | 81.8    | 77.4    | 79.2     | 86.0     | 56.6     | 67.2     | 105.4         | 79.2       | 0.8         |
| 212429_s_at  | GTF3C2      | 9.63E-03 | 651.6      | 622.4      | 766.9      | 809.6       | 867.0       | 916.0       | 869.3       | 630.2   | 504.6   | 566.8   | 727.6    | 517.4    | 602.4    | 531.7    | 809.6         | 566.8      | 0.7         |
| 213835_x_at  | GTPBP3      | 8.95E-03 | 399.7      | 444.3      | 556.9      | 502.2       | 450.6       | 553.1       | 458.7       | 379.6   | 388.0   | 349.2   | 405.3    | 337.5    | 361.3    | 243.2    | 458.7         | 361.3      | 0.8         |
| 202487_s_at  | H2AFV       | 7.13E-03 | 603.9      | 573.3      | 568.2      | 532.3       | 761.8       | 586.5       | 543.2       | 540.8   | 410.4   | 376.4   | 459.5    | 571.1    | 487.7    | 432.7    | 573.3         | 459.5      | 0.8         |
| 227085_at    | H2AFV       | 4.89E-03 | 220.9      | 288.7      | 299.8      | 272.2       | 304.9       | 302.8       | 291.8       | 204.1   | 150.7   | 181.7   | 230.5    | 246.4    | 168.7    | 160.7    | 291.8         | 181.7      | 0.6         |
| 207168_s_at  | H2AFY       | 2.59E-03 | 5611.1     | 5867.9     | 6222.3     | 5744.4      | 6026.7      | 6641.8      | 5911.7      | 4722.3  | 4874.3  | 4328.5  | 4434.2   | 4639.9   | 4322.3   | 3821.2   | 5911.7        | 4434.2     | 0.8         |
| 214501_s_at  | H2AFY       | 1.99E-03 | 4106.9     | 4096.9     | 3205.9     | 3218.9      | 3871.3      | 3723.5      | 3178.0      | 3206.0  | 2903.2  | 1774.5  | 2504.0   | 3167.8   | 2682.0   | 2091.8   | 3723.5        | 2682.0     | 0.7         |
| 214500_at    | H2AFY       | 3.06E-03 | 650.1      | 567.4      | 554.9      | 532.4       | 599.0       | 608.9       | 526.3       | 458.0   | 316.2   | 279.4   | 375.5    | 570.0    | 453.0    | 297.6    | 567.4         | 375.5      | 0.7         |
| 213911_s_at  | H2AFZ       | 1.80E-03 | 2206.5     | 2621.6     | 3048.0     | 2581.0      | 2744.7      | 3334.0      | 2790.6      | 1936.5  | 1860.5  | 1761.8  | 1927.8   | 1415.4   | 1586.2   | 1292.2   | 2744.7        | 1761.8     | 0.6         |
| 200853_at    | H2AFZ       | 1.68E-04 | 1678.3     | 1582.3     | 1781.9     | 1801.1      | 1451.9      | 1592.3      | 1420.9      | 1201.6  | 985.1   | 806.6   | 956.1    | 846.3    | 1002.8   | 816.4    | 1592.3        | 956.1      | 0.6         |
| 201036_s_at  | HADH        | 2.88E-03 | 384.7      | 645.8      | 446.6      | 452.6       | 514.7       | 625.1       | 376.0       | 356.2   | 372.6   | 224.5   | 357.4    | 323.7    | 302.1    | 146.7    | 452.6         | 323.7      | 0.7         |
| 201035_s_at  | HADH        | 3.40E-03 | 492.0      | 781.2      | 562.1      | 545.2       | 603.0       | 719.0       | 432.8       | 501.8   | 379.2   | 227.0   | 342.9    | 455.2    | 329.1    | 193.0    | 562.1         | 342.9      | 0.6         |
| 211569_s_at  | HADH        | 4.31E-03 | 196.5      | 336.7      | 277.0      | 303.2       | 302.2       | 372.2       | 233.6       | 206.4   | 167.5   | 141.3   | 227.3    | 202.2    | 181.5    | 96.7     | 302.2         | 181.5      | 0.6         |
| 217156_at    | HADHA       | 8.67E-03 | 74.3       | 61.9       | 83.4       | 77.3        | 60.2        | 70.7        | 72.6        | 58.7    | 49.9    | 56.6    | 55.9     | 51.1     | 64.6     | 60.7     | 72.6          | 56.6       | 0.8         |
| 201007_at    | HADHB       | 8.53E-03 | 2329.5     | 2721.6     | 2767.7     | 2709.9      | 2461.9      | 2655.5      | 2657.7      | 2162.1  | 2335.7  | 2051.6  | 2299.1   | 1654.8   | 1876.3   | 2079.4   | 2657.7        | 2079.4     | 0.8         |
| 213053_at    | HAUS5       | 8.27E-03 | 186.7      | 160.0      | 185.2      | 202.8       | 220.8       | 201.3       | 179.0       | 172.7   | 134.7   | 137.0   | 168.1    | 137.5    | 157.2    | 135.4    | 186.7         | 137.5      | 0.7         |
| 38037_at     | HBEGF       | 1.80E-03 | 1257.8     | 1100.6     | 1593.8     | 1442.8      | 980.0       | 1241.6      | 1349.8      | 1196.9  | 746.8   | 623.2   | 845.0    | 561.8    | 563.8    | 597.4    | 1257.8        | 623.2      | 0.5         |
| 203821_at    | HBEGF       | 1.07E-03 | 1321.2     | 1126.8     | 1659.7     | 1601.0      | 992.9       | 1402.0      | 1387.3      | 1104.7  | 809.7   | 683.5   | 968.3    | 519.1    | 561.8    | 650.3    | 1387.3        | 683.5      | 0.5         |
| 1564548_at   | hCG_1999814 | 1.92E-03 | 82.3       | 90.0       | 106.8      | 114.8       | 79.7        | 94.8        | 61.1        | 59.7    | 61.7    | 39.4    | 61.6     | 59.0     | 59.5     | 42.3     | 90.0          | 59.5       | 0.7         |
| 1556304_s_at | hCG_2039027 | 1.74E-03 | 115.2      | 127.3      | 131.4      | 133.5       | 152.7       | 167.2       | 126.2       | 102.0   | 82.2    | 79.8    | 91.2     | 113.2    | 90.6     | 92.9     | 131.4         | 91.2       | 0.7         |
| 204225_at    | HDAC4       | 9.83E-03 | 193.0      | 111.9      | 179.9      | 258.0       | 238.8       | 256.1       | 243.3       | 179.9   | 90.9    | 160.3   | 197.7    | 175.8    | 149.4    | 148.7    | 238.8         | 160.3      | 0.7         |
| 202455_at    | HDAC5       | 3.60E-03 | 180.5      | 159.6      | 199.1      | 246.9       | 202.2       | 173.8       | 176.9       | 164.2   | 112.1   | 109.2   | 144.5    | 159.5    | 138.1    | 102.1    | 180.5         | 138.1      | 0.8         |
| 203259_s_at  | HDCC2       | 8.48E-03 | 2000.3     | 2212.7     | 3314.3     | 2765.6      | 3047.9      | 3002.7      | 2670.0      | 2066.8  | 1623.2  | 2106.7  | 2275.5   | 2375.0   | 1829.6   | 1656.4   | 2765.6        | 2066.8     | 0.7         |
| 227008_at    | HDCC3       | 5.82E-03 | 377.1      | 379.8      | 535.2      | 425.2       | 479.5       | 562.8       | 491.0       | 383.5   | 279.0   | 227.3   | 267.5    | 336.1    | 378.6    | 242.7    | 479.5         | 279.0      | 0.6         |
| 223252_at    | HDGF2       | 8.10E-03 | 180.7      | 183.0      | 194.8      | 201.1       | 174.9       | 178.6       | 178.0       | 151.6   | 149.2   | 131.0   | 160.1    | 142.4    | 157.9    | 143.5    | 180.7         | 149.2      | 0.8         |
| 209525_at    | HDGFRP3     | 9.78E-03 | 248.1      | 466.7      | 450.3      | 549.5       | 440.4       | 556.1       | 548.8       | 278.9   | 360.6   | 273.9   | 392.3    | 206.4    | 276.0    | 199.4    | 466.7         | 276.0      | 0.6         |
| 226510_at    | HEATR5A     | 9.33E-03 | 95.4       | 138.2      | 209.1      | 180.1       | 240.7       | 254.7       | 190.8       | 105.5   | 88.5    | 136.2   | 148.3    | 122.6    | 99.1     | 99.0     | 190.8         | 105.5      | 0.6         |
| 233642_s_at  | HEATR5B     | 1.22E-03 | 833.3      | 1118.4     | 751.8      | 803.3       | 825.9       | 954.8       | 684.1       | 696.4   | 676.4   | 360.4   | 648.1    | 505.8    | 516.3    | 388.3    | 825.9         | 516.3      | 0.6         |
| 218632_at    | HECTD3      | 8.53E-03 | 900.5      | 961.5      | 802.9      | 890.3       | 827.2       | 842.3       | 866.9       | 876.3   | 716.2   | 539.6   | 725.5    | 674.3    | 677.7    | 580.4    | 866.9         | 677.7      | 0.8         |
| 218620_s_at  | HEMK1       | 8.95E-03 | 262.8      | 272.2      | 330.7      | 287.7       | 258.6       | 287.9       | 247.2       | 252.0   | 160.3   | 128.3   | 194.7    | 224.7    | 206.4    | 145.0    | 272.2         | 194.7      | 0.7         |
| 217902_s_at  | HERC2       | 5.74E-03 | 544.0      | 585.2      | 624.4      | 702.2       | 816.7       | 777.4       | 605.6       | 529.5   | 438.4   | 369.7   | 526.7    | 440.5    | 452.8    | 490.1    | 624.4         | 452.8      | 0.7         |
| 201944_at    | HEXB        | 6.73E-03 | 11360.2    | 11136.1    | 10326.7    | 10815.4     | 10211.5     | 9148.6      | 9583.4      | 9966.0  | 9310.1  | 7036.1  | 8122.9   | 8359.8   | 7663.1   | 7414.0   | 10326.7       | 8122.9     | 0.8         |
| 227564_at    | HGSNAT      | 4.40E-03 | 213.2      | 242.8      | 199.2      | 244.2       | 269.7       | 236.4       | 230.2       | 209.6   | 168.2   | 127.3   | 175.3    | 216.2    | 163.6    | 135.2    | 236.4         | 168.2      | 0.7         |
| 215933_s_at  | HHEX        | 2.99E-03 | 133.8      | 115.5      | 164.8      | 204.5       | 147.8       | 151.2       | 147.3       | 128.5   | 74.8    | 74.1    | 137.3    | 108.3    | 79.3     | 69.7     | 147.8         | 79.3       | 0.5         |
| 224812_at    | HIBADH      | 4.45E-03 | 1926.5     | 2150.6     | 3471.7     | 2686.2      | 2667.1      | 3685.6      | 2395.4      | 1770.2  | 1837.4  | 1738.8  | 1969.3   | 1620.5   | 1669.9   | 1223.4   | 2667.1        | 1738.8     | 0.7         |
| 224415_s_at  | HINT2       | 2.97E-03 | 651.2      | 761.8      | 710.4      | 709.5       | 654.2       | 810.9       | 589.1       | 616.0   | 447.7   | 388.2   | 502.6    | 523.9    | 529.6    | 340.9    | 709.5         | 502.6      | 0.7         |
| 204504_s_at  | HIRIP3      | 6.16E-03 | 102.1      | 103.0      | 146.8      | 128.2       | 121.7       | 120.1       | 97.7        | 101.5   | 69.0    | 81.5    | 84.1     | 97.7     | 94.4     | 53.4     | 120.1         | 84.1       | 0.7         |
| 206951_at    | HIST1H4E    | 1.49E-03 | 3567.0     | 3373.6     | 3623.4     | 2676.9      | 3031.4      | 2845.7      | 2546.6      | 2608.0  | 2482.9  | 1688.5  | 2186.1   | 2067.6   | 1659.1   | 1436.7   | 3031.4        | 2067.6     | 0.7         |
| 217478_s_at  | HLA-DMA     | 3.49E-03 | 5419.7     | 5557.3     | 5851.3     | 5290.9      | 5164.0      | 5265.2      | 4523.5      | 4625.4  | 3910.9  | 3425.7  | 4053.5   | 4317.0   | 4088.6   | 3069.2   | 5290.9        | 4053.5     | 0.8         |
| 203932_at    | HLA-DMB     | 2.07E-03 | 2872.2     | 3639.3     | 3799.9     | 3633.8      | 3749.9      | 3653.9      | 2816.4      | 2685.3  | 2196.7  | 1584.9  | 2411.0   | 2581.0   | 1728.1   | 1344.4   | 3639.3        | 2196.7     | 0.6         |
| 226878_at    | HLA-DOA     | 4.26E-03 | 1656.7     | 1335.9     | 1321.7     | 1219.2      | 1457.0      | 1473.9      | 1373.9      | 1537.2  | 915.2   | 726.6   | 1019.6   | 1068.3   | 1041.4   | 859.0    | 1373.9        | 1019.6     | 0.7         |
| 211656_x_at  | HLA-DQB1    | 5.68E-03 | 5383.2     | 2472.0     | 1643.6     | 3203.5      | 4099.7      | 7072.6      | 3639.4      | 4161.8  | 1928.6  | 1173.6  | 2623.6   | 3746.4   | 5597.6   | 2809.0   | 3639.4        | 2809.0     | 0.8         |
| 202983_at    | HITF        | 1.07E-03 | 682.9      | 623.9      | 805.9      | 724.6       | 675.2       | 865.8       | 792.4       | 533.1   | 345.7   | 227.2   | 481.3    | 325.7    | 348.8    | 269.5    | 724.6         | 345.7      | 0.5         |
| 208808_s_at  | HIMGB2      | 7.07E-03 | 1585.6     | 2059.1     | 2729.1     | 2063.9      | 2003.8      | 2548.2      | 2336.7      | 1382.3  | 1589.1  | 1403.8  | 1928.6   | 1211.3   | 1010.5   | 1170.6   | 2059.1        | 1382.3     | 0.7         |
| 209377_s_at  | HIMGN3      | 9.76E-03 | 2203.7     | 2536.4     | 2915.6     | 2718.8      | 2486.2      | 2744.7      | 2650.2      | 1772.3  | 2426.5  | 2196.9  | 2459.7   | 1503.1   | 1581.3   | 1724.7   | 2536.4        | 1724.7     | 0.7         |
| 222396_at    | HN1         | 2.77E-03 | 3116.4     | 3834.0     | 2519.4     | 2757.5      | 3046.8      | 3665.3      | 2658.2      | 2418.0  | 2275.3  | 841.9   | 1884.7   | 2643.7   | 2168.0   | 1141.1   | 3116.4        | 2168.0     | 0.7         |
| 212109_at    | HN1L        | 6.77E-03 | 253.8      | 220.7      | 228.8      | 217.3       | 277.4       | 250.6       | 261.9       | 252.1   | 180.1   | 119.8   | 172.5    | 188.9    | 141.0    | 142.4    | 250.6         | 172.5      | 0.5         |
| 209068_at    | HNRPDL      | 9.69E-03 | 798.5      | 851.0      | 1270.0     | 1167.6      | 943.6       | 1300.9      | 1257.7      | 853.3   | 569.8   | 587.9   | 931.0    | 730.9    | 598.5    | 622.2    | 1167.6        | 622.2      | 0.7         |
| 205366_s_at  | HOXB6       | 1.26E-03 | 558.1      | 454.7      | 685.2      | 721.2</     |             |             |             |         |         |         |          |          |          |          |               |            |             |

Supplementary Table S2. Continued.

| ID           | Gene Symbol     | p-value  | VW3_Saline | VW6_Saline | VW7_Saline | VW13_Saline | VW22_Saline | VW23_Saline | VW25_Saline | VW3_LPS | VW6_LPS | VW7_LPS | VW13_LPS | VW22_LPS | VW23_LPS | VW25_LPS | Median_saline | Median_LPS | Fold change |
|--------------|-----------------|----------|------------|------------|------------|-------------|-------------|-------------|-------------|---------|---------|---------|----------|----------|----------|----------|---------------|------------|-------------|
| 203914_x_at  | HPGD            | 3.98E-03 | 433.2      | 359.2      | 401.2      | 450.8       | 344.4       | 328.8       | 350.0       | 522.5   | 212.7   | 139.5   | 218.6    | 170.4    | 153.8    | 122.6    | 359.2         | 170.4      | 0.5         |
| 203913_s_at  | HPGD            | 1.91E-03 | 125.9      | 97.2       | 110.8      | 145.1       | 110.7       | 101.4       | 111.2       | 122.0   | 62.1    | 43.4    | 85.5     | 44.3     | 50.0     | 38.0     | 110.8         | 50.0       | 0.5         |
| 211548_s_at  | HPGD            | 1.40E-03 | 423.9      | 355.7      | 323.7      | 368.1       | 306.7       | 282.0       | 306.6       | 438.0   | 182.4   | 96.4    | 166.4    | 142.4    | 114.1    | 118.9    | 323.7         | 142.4      | 0.4         |
| 206726_at    | HPGD5           | 2.15E-04 | 1494.5     | 1132.3     | 979.0      | 824.9       | 1200.8      | 821.9       | 1123.3      | 1139.4  | 792.5   | 591.8   | 487.8    | 715.2    | 519.9    | 660.1    | 1123.3        | 660.1      | 0.6         |
| 203790_s_at  | HRSPI2          | 3.62E-03 | 129.5      | 154.3      | 167.5      | 175.2       | 196.8       | 194.5       | 131.4       | 121.7   | 117.7   | 122.5   | 135.7    | 126.5    | 140.4    | 92.9     | 167.5         | 122.5      | 0.7         |
| 217989_at    | HSD17B11        | 2.62E-03 | 1389.0     | 1706.8     | 2191.1     | 2009.0      | 1889.0      | 2403.6      | 1918.6      | 1330.3  | 1347.7  | 1208.2  | 1324.1   | 1013.6   | 1186.7   | 974.3    | 1918.6        | 1208.2     | 0.6         |
| 219113_x_at  | HSD17B14        | 6.61E-03 | 80.0       | 74.7       | 112.1      | 104.3       | 95.9        | 116.4       | 105.8       | 61.9    | 46.8    | 98.9    | 72.4     | 85.6     | 94.1     | 77.5     | 104.3         | 77.5       | 0.7         |
| 224494_x_at  | HSD17B14        | 5.32E-03 | 77.5       | 59.6       | 114.1      | 107.9       | 91.5        | 117.1       | 108.8       | 61.7    | 49.6    | 81.4    | 76.5     | 85.1     | 89.5     | 71.9     | 107.9         | 76.5       | 0.7         |
| 228713_s_at  | HSD17B14        | 5.85E-03 | 88.7       | 77.3       | 143.1      | 150.8       | 106.3       | 136.5       | 141.4       | 75.9    | 59.4    | 106.0   | 91.6     | 94.1     | 106.6    | 108.1    | 136.5         | 94.1       | 0.7         |
| 208814_at    | HSPA4           | 3.41E-03 | 517.3      | 632.8      | 570.3      | 624.1       | 691.1       | 888.8       | 684.4       | 499.6   | 404.8   | 254.2   | 442.3    | 483.5    | 578.2    | 361.2    | 632.8         | 442.3      | 0.7         |
| 213418_at    | HSPA6           | 9.61E-03 | 1419.2     | 1787.1     | 964.2      | 1246.4      | 1427.7      | 1083.0      | 1263.3      | 1146.8  | 1279.7  | 832.1   | 716.9    | 1123.1   | 919.7    | 1083.0   | 1263.3        | 1083.0     | 0.9         |
| 219865_at    | HSPC157         | 3.77E-03 | 224.7      | 269.3      | 252.3      | 256.7       | 274.6       | 313.0       | 202.6       | 224.7   | 160.4   | 127.4   | 187.5    | 208.1    | 169.2    | 111.6    | 256.7         | 169.2      | 0.7         |
| 226188_at    | HSPC159         | 5.75E-03 | 139.2      | 152.7      | 226.3      | 231.6       | 164.0       | 185.2       | 140.8       | 132.5   | 126.7   | 136.1   | 122.2    | 108.1    | 94.6     | 48.4     | 164.0         | 122.2      | 0.7         |
| 219998_at    | HSPC159         | 3.42E-04 | 185.6      | 194.6      | 254.8      | 234.3       | 232.0       | 214.5       | 151.7       | 157.5   | 119.2   | 146.8   | 139.4    | 136.2    | 131.0    | 90.2     | 214.5         | 136.2      | 0.6         |
| 208744_x_at  | HSPH1           | 1.76E-03 | 1973.9     | 1867.0     | 1974.5     | 1663.2      | 1727.7      | 1621.1      | 1617.1      | 1574.3  | 1434.5  | 1343.2  | 1163.5   | 1378.3   | 1254.8   | 980.3    | 1727.7        | 1343.2     | 0.8         |
| 206976_s_at  | HSPH1           | 3.37E-03 | 1051.8     | 1119.6     | 1581.2     | 1206.5      | 1232.6      | 1289.7      | 1268.2      | 907.8   | 972.3   | 1109.2  | 879.0    | 747.7    | 716.8    | 671.1    | 1232.6        | 879.0      | 0.7         |
| 202390_s_at  | HIT             | 2.55E-03 | 199.3      | 165.7      | 150.0      | 271.7       | 246.8       | 206.0       | 230.6       | 128.2   | 103.2   | 94.6    | 189.5    | 159.1    | 203.6    | 166.3    | 206.0         | 159.1      | 0.8         |
| 226879_at    | HVCN1           | 1.80E-03 | 1249.8     | 1259.1     | 1215.4     | 1250.1      | 1332.7      | 1494.2      | 1113.7      | 1116.8  | 719.9   | 357.0   | 696.5    | 826.1    | 715.3    | 440.4    | 1250.1        | 715.3      | 0.6         |
| 217900_at    | IARS2           | 4.83E-03 | 761.8      | 831.4      | 814.7      | 829.5       | 765.2       | 844.4       | 791.5       | 695.4   | 544.3   | 612.0   | 703.0    | 576.4    | 645.9    | 564.7    | 814.7         | 612.0      | 0.8         |
| 201565_s_at  | ID2             | 3.54E-04 | 915.5      | 579.0      | 1051.2     | 1016.4      | 512.4       | 908.4       | 754.1       | 588.9   | 372.8   | 383.3   | 460.3    | 340.2    | 436.5    | 439.9    | 908.4         | 436.5      | 0.5         |
| 201566_x_at  | ID2             | 1.42E-03 | 151.2      | 103.6      | 261.3      | 238.0       | 137.0       | 230.8       | 197.3       | 113.0   | 88.4    | 100.9   | 124.9    | 79.9     | 91.8     | 90.5     | 197.3         | 91.8       | 0.5         |
| 207826_s_at  | ID3             | 1.60E-03 | 119.3      | 79.4       | 100.2      | 111.1       | 101.8       | 110.5       | 90.5        | 82.4    | 62.4    | 70.4    | 75.1     | 78.0     | 78.6     | 76.8     | 101.8         | 76.8       | 0.8         |
| 242001_at    | IDH1            | 1.54E-03 | 152.0      | 167.8      | 238.4      | 188.3       | 152.1       | 150.4       | 142.6       | 129.2   | 97.2    | 73.7    | 119.5    | 79.1     | 87.4     | 69.2     | 152.1         | 87.4       | 0.6         |
| 201193_at    | IDH1            | 4.10E-04 | 3287.0     | 3618.8     | 3798.3     | 3518.3      | 3076.9      | 3295.0      | 3073.9      | 2221.2  | 2295.1  | 1307.7  | 2314.8   | 1358.7   | 1697.8   | 1348.8   | 3295.0        | 1697.8     | 0.5         |
| 1555037_a_at | IDH1            | 7.95E-04 | 1823.5     | 2086.6     | 2347.0     | 2133.9      | 1833.8      | 2076.9      | 1990.4      | 1343.2  | 1373.9  | 828.3   | 1416.0   | 689.1    | 832.9    | 727.6    | 2076.9        | 832.9      | 0.4         |
| 202439_s_at  | IDS             | 4.37E-03 | 2891.4     | 2957.0     | 2635.9     | 3120.4      | 2971.8      | 3380.6      | 2891.3      | 2651.5  | 2322.8  | 1956.5  | 2559.5   | 2222.7   | 2444.4   | 2045.7   | 2957.0        | 2322.8     | 0.8         |
| 209721_s_at  | IFFO1           | 8.01E-03 | 1300.4     | 1549.9     | 1574.7     | 1479.1      | 1419.0      | 1392.4      | 1300.8      | 1160.6  | 1070.8  | 603.0   | 1095.1   | 1168.5   | 966.3    | 756.3    | 1419.0        | 1070.8     | 0.8         |
| 36030_at     | IFFO1           | 2.01E-03 | 1162.7     | 1209.6     | 1437.7     | 1331.1      | 1258.4      | 1312.6      | 1177.9      | 947.5   | 793.4   | 537.3   | 935.1    | 879.5    | 738.5    | 665.0    | 1258.4        | 793.4      | 0.6         |
| 210312_s_at  | IFT20           | 2.86E-03 | 1381.2     | 1375.4     | 1184.1     | 1368.7      | 1237.6      | 1469.0      | 1231.9      | 1120.1  | 1060.4  | 704.9   | 892.3    | 1082.6   | 1076.5   | 866.8    | 1368.7        | 1060.4     | 0.8         |
| 207167_at    | IGSF2           | 3.19E-03 | 353.9      | 445.7      | 390.5      | 765.9       | 434.2       | 566.4       | 495.8       | 333.7   | 309.8   | 181.7   | 467.5    | 324.4    | 360.9    | 231.9    | 445.7         | 324.4      | 0.7         |
| 204773_at    | IL11RA          | 3.13E-03 | 345.7      | 302.8      | 297.7      | 278.6       | 311.6       | 274.2       | 251.0       | 329.7   | 196.1   | 147.6   | 195.6    | 213.1    | 170.1    | 107.5    | 297.7         | 195.6      | 0.7         |
| 201888_s_at  | IL13RA1         | 9.40E-03 | 789.6      | 956.8      | 1388.9     | 1315.0      | 965.2       | 1455.9      | 1187.1      | 795.6   | 859.0   | 783.0   | 1023.6   | 659.6    | 848.7    | 670.5    | 1187.1        | 795.6      | 0.7         |
| 201887_at    | IL13RA1         | 5.96E-03 | 917.3      | 1308.3     | 1535.3     | 1368.6      | 1299.8      | 1671.6      | 1342.1      | 927.1   | 897.3   | 585.1   | 1106.5   | 766.1    | 858.6    | 604.4    | 1342.1        | 858.6      | 0.6         |
| 224361_s_at  | IL17RB          | 8.13E-03 | 682.6      | 708.3      | 862.7      | 744.0       | 519.8       | 276.6       | 483.2       | 666.2   | 442.6   | 436.4   | 433.9    | 362.7    | 264.6    | 297.8    | 862.6         | 433.9      | 0.6         |
| 224156_x_at  | IL17RB          | 8.28E-04 | 1519.1     | 1459.2     | 1564.3     | 1356.3      | 992.9       | 506.9       | 913.5       | 1185.7  | 913.3   | 815.5   | 707.4    | 677.0    | 397.1    | 506.0    | 1356.3        | 707.4      | 0.5         |
| 219255_x_at  | IL17RB          | 9.33E-04 | 1642.8     | 1558.9     | 1656.9     | 1404.0      | 1022.1      | 508.5       | 1006.9      | 1263.1  | 970.5   | 860.4   | 725.7    | 671.3    | 416.4    | 530.4    | 1404.0        | 725.7      | 0.5         |
| 221688_s_at  | IMP3            | 8.53E-03 | 918.3      | 758.6      | 785.8      | 842.7       | 786.9       | 847.7       | 739.2       | 823.1   | 610.4   | 497.7   | 703.4    | 683.7    | 650.4    | 522.3    | 786.9         | 650.4      | 0.8         |
| 224743_at    | IMPAD1          | 1.59E-03 | 1496.4     | 1485.6     | 1415.7     | 1572.5      | 1430.4      | 1722.5      | 1802.0      | 1217.5  | 1125.1  | 1001.8  | 1283.2   | 903.9    | 1012.4   | 1119.4   | 1496.4        | 1119.4     | 0.7         |
| 205981_s_at  | ING2            | 2.31E-03 | 454.1      | 484.5      | 565.2      | 522.9       | 506.4       | 578.5       | 405.9       | 417.5   | 319.8   | 298.5   | 343.3    | 378.2    | 419.0    | 232.3    | 506.4         | 343.3      | 0.7         |
| 213544_at    | ING2            | 2.63E-03 | 172.5      | 176.9      | 232.6      | 199.2       | 205.0       | 219.7       | 153.6       | 162.8   | 96.0    | 110.5   | 162.8    | 127.0    | 120.2    | 89.8     | 199.2         | 120.2      | 0.6         |
| 228287_at    | ING5            | 6.78E-03 | 289.4      | 273.9      | 380.6      | 378.6       | 491.0       | 393.2       | 374.2       | 305.1   | 193.8   | 152.3   | 305.5    | 261.7    | 203.3    | 201.5    | 378.6         | 203.3      | 0.5         |
| 223072_s_at  | INO80B /// WBP1 | 4.54E-03 | 252.8      | 248.5      | 318.6      | 340.8       | 297.7       | 333.5       | 283.1       | 232.4   | 199.4   | 201.0   | 188.9    | 223.7    | 259.8    | 159.6    | 297.7         | 201.0      | 0.7         |
| 204553_x_at  | INPP4A          | 5.94E-03 | 308.8      | 353.0      | 355.5      | 377.9       | 366.3       | 371.5       | 284.5       | 278.2   | 184.2   | 163.0   | 289.9    | 322.0    | 251.0    | 163.9    | 355.5         | 251.0      | 0.7         |
| 208364_at    | INPP4A          | 8.32E-04 | 362.7      | 417.2      | 392.9      | 496.3       | 344.3       | 373.1       | 342.1       | 224.5   | 238.5   | 225.5   | 385.3    | 231.1    | 289.2    | 252.0    | 373.1         | 238.5      | 0.6         |
| 204552_at    | INPP4A          | 3.91E-03 | 130.7      | 184.5      | 191.1      | 211.4       | 211.2       | 237.0       | 155.1       | 131.0   | 104.3   | 63.8    | 150.5    | 127.8    | 84.1     | 64.1     | 191.1         | 104.3      | 0.5         |
| 227087_at    | INPP4A          | 5.96E-03 | 207.2      | 371.8      | 375.4      | 340.0       | 356.4       | 394.1       | 312.2       | 240.7   | 148.2   | 117.2   | 242.3    | 224.1    | 146.8    | 113.3    | 356.4         | 148.2      | 0.4         |
| 207851_s_at  | INSR            | 4.90E-03 | 61.4       | 70.9       | 84.3       | 57.9        | 72.6        | 86.6        | 61.6        | 61.4    | 45.0    | 41.2    | 39.3     | 48.6     | 54.9     | 48.8     | 70.9          | 48.6       | 0.7         |
| 213792_s_at  | INSR            | 1.71E-03 | 1424.6     | 2091.2     | 2289.9     | 1779.5      | 1964.9      | 2611.7      | 1456.5      | 1274.9  | 1507.9  | 1035.0  | 1134.3   | 1283.3   | 1236.4   | 781.8    | 1964.9        | 1236.4     | 0.6         |
| 226450_at    | INSR            | 1.19E-03 | 241.9      | 337.6      | 385.9      | 280.5       | 399.6       | 492.3       | 333.1       | 200.6   | 223.4   | 145.6   | 187.0    | 191.8    | 188.8    | 133.6    | 337.6         | 188.8      | 0.6         |
| 205701_at    | IPO8            | 5.66E-03 | 924.3      | 1007.5     | 1138.1     | 999.7       | 1133.8      | 1345.2      | 961.4       | 954.6   | 726.8   | 692.7   | 768.4    | 833.3    | 867.0    | 623.6    | 1007.5        | 768.4      | 0.8         |
| 225528_at    | IPO8            | 5.30E-03 | 660.7      | 893.4      | 1141.3     | 1052.6      | 1015.5      | 1379.0      | 1161.7      | 673.4   | 710.4   | 659.8   | 777.3    | 531.0    | 642.9    | 608.9    | 1052.6        | 659.8      | 0.6         |
| 204202_at    | IQCE            | 7.65E-03 | 80.7       | 93.3       | 112.6      | 110.2       | 139.2       | 125.9       | 104.0       | 89.9    | 54.9    | 62.5    | 88.7     | 92.1     | 82.6     | 62.0     | 110.2         | 82.6       | 0.7         |
| 203906_at    | IQSEC1          | 3.59E-03 | 912.9      | 851.6      | 889.9      | 1162.8      | 1199.7      | 1022.5      | 1143.1      | 909.3   | 481.3   | 439.5   | 741.8    | 840.4    | 769.5    | 601.3    | 1022.5        | 741.8      | 0.7         |
| 224075_s_at  | IRF2BP2         | 5.91E-03 | 2140.5     | 2318.1     | 3017.7     | 2794.7      | 2724.2      | 3250.3      | 2695.2      | 1913.9  | 1915.4  | 1411.7  | 2325.9   | 1812.5   | 1581.0   | 1561.9   | 2724.2        | 1812.5     | 0.7         |
| 224571_at    | IRF2BP2         | 1.89E-03 | 1804.3     | 1901.8     | 2399.5     | 2094.1      | 2112.0      | 2818.8      | 1863.9      | 1432.9  | 1076.5  | 802.7   | 1589.7   | 1189.6   | 966.0    | 967.0    | 2094.1        | 1076.5     | 0.5         |
| 209185_s_at  | IRS2            | 1.40E-03 | 1302.3     | 1567.3     | 1281.1     | 1750.6      | 1725.8      | 2457.8      | 1795.0      | 1040.7  | 843.6   | 301.1   | 1148.7   | 573.2    | 845.4    | 483.9    | 1725.8        | 843.6      | 0.5         |
| 209184_s_at  | IRS2            | 1.73E-03 | 648.3      | 700.0      | 558.1      | 821.4       | 809.4       | 1097.9      | 801.2       | 537.1   | 453.2   | 149.7   | 528.7    | 331.9    | 378.8    | 272.8    | 801.2         | 378.8      | 0.5         |
| 209075_s_at  | ISCU            | 5.27E-03 | 1575.7     | 1690.1     | 2017.0     | 1688.8      | 1818.8      | 1993.4      | 1936.4      | 1412.7  |         |         |          |          |          |          |               |            |             |

TRANSCRIPTION PROFILES IN ALVEOLAR MACROPHAGES

Supplementary Table S2. Continued.

| ID           | Gene Symbol      | p-value  | VW3_Saline | VW6_Saline | VW7_Saline | VW13_Saline | VW22_Saline | VW23_Saline | VW25_Saline | VW3_LPS | VW6_LPS | VW7_LPS | VW13_LPS | VW22_LPS | VW23_LPS | VW25_LPS | Median_saline | Median_LPS | Fold change |
|--------------|------------------|----------|------------|------------|------------|-------------|-------------|-------------|-------------|---------|---------|---------|----------|----------|----------|----------|---------------|------------|-------------|
| 226267_at    | JDP2             | 7.59E-03 | 196.9      | 212.1      | 187.8      | 218.5       | 212.7       | 202.0       | 188.7       | 191.7   | 164.8   | 107.1   | 141.7    | 164.7    | 149.0    | 151.5    | 202.0         | 151.5      | 0.8         |
| 224933_s_at  | JMJD1C           | 2.61E-03 | 1544.7     | 1511.3     | 1548.7     | 1457.8      | 1519.8      | 1758.1      | 1360.3      | 1098.4  | 1250.5  | 996.4   | 1219.0   | 1138.0   | 1164.8   | 1085.2   | 1519.8        | 1138.0     | 0.7         |
| 1568605_at   | JRK              | 8.87E-03 | 80.0       | 79.3       | 92.3       | 102.5       | 114.0       | 121.8       | 141.2       | 80.5    | 57.5    | 58.9    | 94.0     | 77.5     | 75.5     | 77.8     | 102.5         | 77.5       | 0.8         |
| 201465_s_at  | JUN              | 7.75E-03 | 1557.3     | 1419.3     | 1089.1     | 1239.2      | 1034.3      | 958.1       | 1072.6      | 1013.3  | 838.6   | 657.7   | 794.7    | 782.1    | 1033.7   | 847.7    | 1089.1        | 838.6      | 0.8         |
| 201466_s_at  | JUN              | 1.46E-03 | 656.0      | 701.6      | 898.9      | 864.6       | 655.4       | 889.9       | 810.9       | 522.3   | 523.0   | 553.6   | 715.0    | 405.2    | 517.0    | 431.7    | 810.9         | 522.3      | 0.6         |
| 228777_at    | KBTBD3           | 9.36E-03 | 89.2       | 90.6       | 123.1      | 88.0        | 102.2       | 111.9       | 93.6        | 94.6    | 58.3    | 66.7    | 83.6     | 60.2     | 54.2     | 50.1     | 93.6          | 60.2       | 0.6         |
| 223412_at    | KBTBD7           | 9.06E-04 | 112.1      | 140.1      | 155.6      | 171.0       | 150.7       | 197.2       | 160.7       | 99.2    | 87.7    | 73.5    | 116.6    | 83.2     | 111.1    | 78.4     | 155.6         | 87.7       | 0.6         |
| 210079_x_at  | KCNAB1           | 1.78E-03 | 322.6      | 293.3      | 696.8      | 420.2       | 624.2       | 596.4       | 493.5       | 266.9   | 198.4   | 203.2   | 241.3    | 345.4    | 238.5    | 163.5    | 493.5         | 238.5      | 0.5         |
| 208213_s_at  | KCNAB1           | 3.23E-03 | 391.5      | 308.3      | 885.8      | 489.3       | 819.7       | 825.9       | 651.7       | 355.4   | 204.1   | 239.0   | 282.0    | 376.4    | 272.0    | 141.3    | 651.7         | 272.0      | 0.4         |
| 210471_s_at  | KCNAB1           | 6.00E-03 | 304.2      | 343.2      | 1242.2     | 612.4       | 914.7       | 938.5       | 748.8       | 285.2   | 276.0   | 295.7   | 366.9    | 406.6    | 217.2    | 172.5    | 748.8         | 285.2      | 0.4         |
| 210078_s_at  | KCNAB1           | 8.92E-03 | 297.1      | 495.2      | 1488.2     | 874.3       | 1299.6      | 1350.6      | 1086.2      | 351.1   | 363.5   | 462.3   | 513.6    | 479.9    | 330.8    | 185.0    | 1086.2        | 363.5      | 0.3         |
| 203402_at    | KCNAB2           | 1.00E-03 | 538.9      | 391.9      | 603.9      | 555.3       | 443.0       | 455.7       | 391.2       | 392.3   | 251.9   | 206.0   | 300.2    | 293.4    | 288.9    | 176.6    | 455.7         | 288.9      | 0.6         |
| 211791_s_at  | KCNAB2           | 4.50E-03 | 195.7      | 179.7      | 278.8      | 280.7       | 200.4       | 225.4       | 233.3       | 146.1   | 100.3   | 107.2   | 121.8    | 187.0    | 177.6    | 112.3    | 225.4         | 121.8      | 0.5         |
| 222923_s_at  | KCNE3            | 6.59E-04 | 526.2      | 747.2      | 683.6      | 1100.8      | 848.3       | 957.0       | 596.0       | 429.5   | 376.6   | 198.4   | 476.5    | 494.3    | 457.0    | 273.7    | 747.2         | 429.5      | 0.6         |
| 227647_at    | KCNE3            | 1.22E-03 | 965.0      | 1137.7     | 1451.1     | 1341.4      | 1526.0      | 2115.9      | 1383.4      | 850.9   | 621.4   | 344.8   | 693.8    | 620.2    | 731.4    | 406.0    | 1383.4        | 621.4      | 0.4         |
| 223658_at    | KCNK6            | 4.23E-03 | 227.9      | 184.1      | 306.2      | 284.5       | 207.9       | 261.0       | 188.4       | 204.6   | 130.9   | 159.2   | 205.8    | 168.0    | 180.5    | 138.5    | 227.9         | 168.0      | 0.7         |
| 221583_s_at  | KCNMA1           | 7.35E-03 | 422.9      | 374.9      | 219.4      | 477.3       | 909.8       | 508.7       | 572.8       | 393.0   | 201.1   | 127.6   | 334.1    | 851.7    | 351.9    | 264.2    | 477.3         | 334.1      | 0.7         |
| 221584_s_at  | KCNMA1           | 2.62E-04 | 549.6      | 490.0      | 309.1      | 681.5       | 1287.1      | 728.5       | 697.0       | 377.4   | 281.0   | 155.4   | 458.8    | 882.5    | 378.3    | 315.2    | 681.5         | 377.4      | 0.6         |
| 226518_at    | KCTD10           | 2.89E-03 | 815.3      | 776.3      | 927.6      | 852.8       | 853.3       | 961.8       | 970.5       | 673.4   | 632.5   | 653.4   | 696.0    | 574.7    | 752.0    | 615.1    | 853.3         | 653.4      | 0.8         |
| 201728_s_at  | KIAA0100         | 7.26E-03 | 657.3      | 686.5      | 586.0      | 665.2       | 669.5       | 690.3       | 620.4       | 642.9   | 414.2   | 352.1   | 539.6    | 539.9    | 531.3    | 397.2    | 665.2         | 531.3      | 0.8         |
| 201729_s_at  | KIAA0100         | 3.58E-03 | 791.7      | 695.9      | 601.2      | 726.5       | 649.2       | 724.3       | 609.8       | 653.1   | 420.8   | 378.8   | 557.8    | 554.0    | 584.8    | 426.5    | 695.9         | 554.0      | 0.8         |
| 212523_s_at  | KIAA0146         | 2.98E-03 | 558.3      | 898.8      | 827.4      | 840.0       | 794.0       | 837.9       | 782.3       | 533.2   | 612.9   | 571.9   | 654.5    | 510.8    | 503.2    | 424.8    | 827.4         | 533.2      | 0.6         |
| 212056_at    | KIAA0182         | 5.91E-03 | 101.5      | 161.3      | 142.1      | 221.6       | 164.2       | 187.2       | 151.9       | 125.7   | 85.3    | 67.7    | 129.6    | 98.3     | 109.0    | 86.5     | 161.3         | 98.3       | 0.6         |
| 38892_at     | KIAA0240         | 5.92E-03 | 235.9      | 271.5      | 346.6      | 346.5       | 346.8       | 414.4       | 309.5       | 247.5   | 199.7   | 210.0   | 276.8    | 206.1    | 221.5    | 180.1    | 346.5         | 210.0      | 0.6         |
| 202220_at    | KIAA0907         | 7.22E-03 | 990.4      | 1278.4     | 1459.3     | 1194.3      | 1100.1      | 1264.1      | 1221.7      | 964.3   | 1033.3  | 899.2   | 996.8    | 815.6    | 745.6    | 776.5    | 1221.7        | 899.2      | 0.7         |
| 235674_at    | KIAA0922         | 6.37E-03 | 276.4      | 487.9      | 460.3      | 365.4       | 412.8       | 500.4       | 435.0       | 269.6   | 301.6   | 188.0   | 316.9    | 286.1    | 269.2    | 228.3    | 435.0         | 269.6      | 0.6         |
| 226816_s_at  | KIAA1143         | 7.47E-03 | 320.0      | 397.2      | 423.7      | 433.7       | 471.7       | 612.5       | 552.1       | 344.1   | 236.4   | 263.2   | 363.7    | 272.1    | 281.7    | 225.2    | 433.7         | 272.1      | 0.6         |
| 223110_at    | KIAA1429         | 8.54E-03 | 395.3      | 352.4      | 470.8      | 435.9       | 477.4       | 480.4       | 486.4       | 333.0   | 315.3   | 360.6   | 387.9    | 314.8    | 373.6    | 319.9    | 470.8         | 333.0      | 0.7         |
| 231850_x_at  | KIAA1712         | 4.85E-03 | 146.9      | 207.5      | 250.2      | 211.9       | 209.5       | 332.8       | 219.0       | 148.5   | 156.4   | 108.8   | 156.4    | 118.4    | 156.4    | 96.2     | 211.9         | 148.5      | 0.7         |
| 228334_x_at  | KIAA1712         | 7.92E-03 | 395.2      | 551.8      | 713.1      | 547.8       | 604.2       | 886.1       | 658.7       | 396.3   | 381.6   | 214.9   | 463.2    | 301.3    | 368.2    | 208.4    | 604.2         | 368.2      | 0.6         |
| 229173_at    | KIAA1715         | 5.11E-03 | 338.8      | 418.6      | 554.0      | 546.4       | 547.4       | 561.4       | 564.7       | 309.8   | 312.4   | 339.2   | 502.8    | 330.6    | 312.8    | 313.8    | 547.4         | 313.8      | 0.6         |
| 225623_at    | KIAA1737         | 6.88E-04 | 1079.4     | 1067.7     | 1176.7     | 1038.6      | 853.5       | 1009.8      | 958.5       | 772.0   | 719.9   | 548.6   | 722.0    | 571.4    | 709.6    | 499.6    | 1038.6        | 709.6      | 0.7         |
| 243539_at    | KIAA1841         | 4.65E-03 | 96.4       | 107.6      | 109.7      | 103.5       | 99.4        | 105.0       | 104.0       | 75.1    | 87.8    | 88.3    | 89.7     | 59.2     | 77.7     | 61.9     | 104.0         | 77.7       | 0.7         |
| 202183_s_at  | KIF22            | 7.39E-03 | 154.5      | 117.6      | 171.6      | 171.6       | 152.0       | 148.6       | 172.5       | 123.8   | 94.1    | 95.7    | 113.6    | 143.4    | 121.6    | 113.0    | 154.5         | 113.6      | 0.7         |
| 220266_s_at  | KLF4             | 9.85E-04 | 1203.5     | 1166.8     | 1426.6     | 1377.0      | 1029.5      | 1267.5      | 755.3       | 849.9   | 785.7   | 485.8   | 576.3    | 697.2    | 677.7    | 443.4    | 1203.5        | 677.7      | 0.6         |
| 221841_s_at  | KLF4             | 1.62E-03 | 1114.5     | 1367.8     | 2130.8     | 1924.5      | 1672.4      | 2179.1      | 1315.6      | 997.2   | 1004.3  | 837.4   | 1005.7   | 695.5    | 742.4    | 456.4    | 1672.4        | 837.4      | 0.5         |
| 204334_at    | KLF7             | 2.72E-03 | 1037.2     | 933.6      | 754.7      | 806.5       | 1073.5      | 874.3       | 849.7       | 772.1   | 547.6   | 246.7   | 604.6    | 698.6    | 601.4    | 471.5    | 874.3         | 601.4      | 0.7         |
| 219930_at    | KLF8             | 4.59E-03 | 170.6      | 162.5      | 177.7      | 179.5       | 136.4       | 152.1       | 109.1       | 126.9   | 122.2   | 127.0   | 130.2    | 111.3    | 99.9     | 103.2    | 162.5         | 122.2      | 0.8         |
| 230986_at    | KLF8             | 5.91E-03 | 214.6      | 335.0      | 273.5      | 342.0       | 302.7       | 346.3       | 236.4       | 252.3   | 210.9   | 133.9   | 217.2    | 187.2    | 162.5    | 143.3    | 302.7         | 187.2      | 0.6         |
| 217906_at    | KLHDC2           | 9.63E-04 | 707.0      | 820.7      | 790.9      | 841.8       | 889.8       | 978.9       | 660.1       | 599.2   | 512.2   | 408.9   | 587.4    | 625.0    | 599.1    | 441.5    | 820.7         | 587.4      | 0.7         |
| 225755_at    | KLHDC8B          | 9.29E-03 | 1353.0     | 1179.7     | 1300.9     | 1243.7      | 1081.9      | 1091.3      | 1536.5      | 1186.8  | 735.7   | 674.9   | 825.3    | 1025.1   | 930.9    | 794.3    | 1243.7        | 825.3      | 0.7         |
| 1552425_a_at | KLHL10           | 1.69E-03 | 139.9      | 104.1      | 232.3      | 144.7       | 123.8       | 210.1       | 165.0       | 125.7   | 68.0    | 118.1   | 101.5    | 68.3     | 87.4     | 69.3     | 144.7         | 87.4       | 0.6         |
| 212882_at    | KLHL18           | 8.06E-03 | 466.4      | 622.3      | 583.9      | 488.8       | 570.6       | 633.1       | 506.0       | 463.7   | 399.5   | 310.4   | 464.7    | 331.3    | 401.5    | 335.9    | 570.6         | 399.5      | 0.7         |
| 219157_at    | KLHL2            | 5.91E-03 | 1234.4     | 1404.1     | 1811.6     | 1451.2      | 1615.5      | 2149.4      | 1842.5      | 1100.2  | 1104.7  | 1211.4  | 1275.3   | 912.4    | 1041.1   | 887.5    | 1615.5        | 1100.2     | 0.7         |
| 49329_at     | KLHL22           | 5.64E-03 | 190.0      | 170.0      | 198.3      | 217.9       | 188.7       | 166.3       | 185.6       | 150.0   | 129.6   | 112.8   | 171.1    | 150.4    | 146.9    | 137.6    | 188.7         | 146.9      | 0.8         |
| 221986_s_at  | KLHL24           | 1.40E-03 | 393.5      | 458.3      | 821.5      | 658.9       | 701.0       | 838.1       | 583.7       | 372.7   | 219.8   | 315.2   | 399.7    | 437.2    | 361.0    | 240.0    | 658.9         | 361.0      | 0.5         |
| 221985_at    | KLHL24           | 1.60E-03 | 535.3      | 635.3      | 891.6      | 744.1       | 741.2       | 890.5       | 652.5       | 475.7   | 364.6   | 368.7   | 446.5    | 546.2    | 406.0    | 285.6    | 741.2         | 406.0      | 0.5         |
| 221221_s_at  | KLHL3            | 3.80E-03 | 76.3       | 63.4       | 63.7       | 82.2        | 60.4        | 76.5        | 73.7        | 55.2    | 60.7    | 35.2    | 60.7     | 45.1     | 53.7     | 44.2     | 73.7          | 53.7       | 0.7         |
| 1560397_s_at | KLHL6            | 1.94E-03 | 2142.4     | 1842.8     | 1836.4     | 1819.5      | 1966.8      | 1599.4      | 2163.8      | 1728.1  | 1166.9  | 1311.4  | 1187.8   | 1211.3   | 1428.8   | 1265.2   | 1842.8        | 1265.2     | 0.7         |
| 228167_at    | KLHL6            | 9.75E-03 | 240.2      | 261.3      | 376.6      | 348.8       | 383.9       | 391.1       | 491.0       | 264.0   | 163.0   | 263.4   | 256.3    | 204.6    | 202.9    | 160.6    | 376.6         | 204.6      | 0.5         |
| 206316_s_at  | KN1C1            | 5.82E-04 | 217.7      | 209.0      | 231.2      | 248.4       | 217.0       | 241.9       | 199.0       | 171.1   | 122.2   | 121.3   | 190.8    | 121.9    | 114.3    | 107.8    | 217.7         | 121.9      | 0.6         |
| 235252_at    | KSR1             | 3.42E-03 | 1546.2     | 1569.4     | 1924.2     | 1602.4      | 1438.0      | 2196.3      | 1680.6      | 1394.1  | 1023.2  | 627.2   | 1194.6   | 781.0    | 1256.2   | 778.8    | 1602.4        | 1023.2     | 0.6         |
| 213770_at    | KSR1             | 8.64E-03 | 226.1      | 157.4      | 247.7      | 206.2       | 191.5       | 281.5       | 226.2       | 189.0   | 136.2   | 106.4   | 177.1    | 120.9    | 204.3    | 137.1    | 226.1         | 137.1      | 0.6         |
| 1552490_at   | LACE1            | 7.55E-03 | 68.0       | 63.4       | 64.8       | 63.4        | 66.1        | 62.8        | 56.8        | 60.2    | 47.9    | 48.9    | 53.3     | 50.7     | 34.6     | 45.2     | 63.4          | 48.9       | 0.8         |
| 222714_s_at  | LACTB2           | 1.17E-03 | 466.6      | 501.8      | 845.4      | 682.8       | 660.7       | 783.5       | 673.4       | 406.2   | 343.6   | 350.4   | 441.1    | 310.3    | 406.4    | 290.5    | 673.4         | 350.4      | 0.5         |
| 216264_s_at  | LAMB2            | 5.10E-03 | 472.8      | 353.2      | 220.0      | 353.4       | 228.6       | 119.0       | 310.9       | 335.9   | 202.6   | 147.0   | 199.8    | 183.7    | 106.4    | 267.3    | 310.9         | 199.8      | 0.6         |
| 200618_at    | LASP1            | 4.97E-03 | 3128.6     | 3398.8     | 3028.8     | 3147.1      | 3256.8      | 3150.7      | 3355.1      | 2777.1  | 2490.6  | 1565.7  | 2582.4   | 2529.7   | 2274.6   | 2005.0   | 3150.7        | 2490.6     | 0.8         |
| 211005_at    | LAT ///<br>SPNS1 | 2.73E-03 | 3430.4     | 4376.8     | 3575.9     | 2349.4      | 2927.2      | 3609.9      | 2110.2      | 2604.8  | 2675.9  | 1242.7  | 1894.8   | 1913.5   | 2009.0</ |          |               |            |             |

Supplementary Table S2. Continued.

| ID           | Gene Symbol                                                              | p-value  | VW3_Saline | VW6_Saline | VW7_Saline | VW13_Saline | VW22_Saline | VW23_Saline | VW25_Saline | VW3_LPS | VW6_LPS | VW7_LPS | VW13_LPS | VW22_LPS | VW23_LPS | VW25_LPS | Median_saline | Median_LPS | Fold change |
|--------------|--------------------------------------------------------------------------|----------|------------|------------|------------|-------------|-------------|-------------|-------------|---------|---------|---------|----------|----------|----------|----------|---------------|------------|-------------|
| 207170_s_at  | LETMD1                                                                   | 7.17E-03 | 303.3      | 336.7      | 368.1      | 287.7       | 461.0       | 430.3       | 375.8       | 313.5   | 257.9   | 243.9   | 227.0    | 303.6    | 300.8    | 211.5    | 368.1         | 257.9      | 0.7         |
| 208935_s_at  | LGALS8                                                                   | 9.68E-03 | 1563.5     | 1376.8     | 1573.8     | 1919.6      | 1536.8      | 1433.8      | 1499.4      | 1473.1  | 1137.2  | 802.9   | 1256.4   | 1228.7   | 1008.7   | 1198.7   | 1536.8        | 1198.7     | 0.8         |
| 217892_s_at  | LIMA1                                                                    | 4.85E-03 | 1299.9     | 1598.5     | 1738.2     | 1554.9      | 1828.8      | 2266.7      | 1792.1      | 1017.0  | 1373.7  | 1050.0  | 1451.2   | 1094.2   | 1265.5   | 1176.2   | 1738.2        | 1176.2     | 0.7         |
| 206440_at    | LIN7A                                                                    | 2.09E-03 | 348.0      | 478.6      | 746.6      | 651.0       | 671.6       | 835.6       | 727.2       | 320.7   | 352.0   | 301.2   | 347.7    | 388.5    | 451.1    | 280.0    | 671.6         | 347.7      | 0.5         |
| 241957_x_at  | LIN7B                                                                    | 5.38E-03 | 66.1       | 67.6       | 107.6      | 96.2        | 89.4        | 94.7        | 59.8        | 74.8    | 43.0    | 62.7    | 61.3     | 49.3     | 58.0     | 41.9     | 89.4          | 58.0       | 0.6         |
| 201847_at    | LIPA                                                                     | 8.11E-03 | 6213.8     | 4954.9     | 4609.8     | 5164.0      | 3748.7      | 5130.0      | 3712.8      | 5182.1  | 3781.7  | 3110.1  | 4168.2   | 3677.7   | 3606.1   | 2344.0   | 4954.9        | 3677.7     | 0.7         |
| 225793_at    | LIX1L                                                                    | 2.99E-03 | 2487.2     | 2987.7     | 2896.7     | 2984.4      | 3144.9      | 3310.2      | 2869.6      | 2355.2  | 2279.6  | 1664.7  | 2257.8   | 2003.4   | 2078.2   | 1949.4   | 2984.4        | 2078.2     | 0.7         |
| 218191_s_at  | LMBRD1                                                                   | 2.64E-03 | 1493.8     | 1857.8     | 1672.2     | 1812.2      | 1802.0      | 1923.0      | 1527.9      | 1390.3  | 1468.6  | 1022.5  | 1326.4   | 1242.6   | 1210.7   | 938.7    | 1802.0        | 1242.6     | 0.7         |
| 231866_at    | LNPEP                                                                    | 4.38E-03 | 495.5      | 839.0      | 969.8      | 737.6       | 994.7       | 1129.5      | 1049.5      | 481.8   | 477.1   | 333.4   | 634.5    | 464.8    | 415.5    | 376.0    | 969.8         | 464.8      | 0.5         |
| 236874_at    | LOC100128071                                                             | 7.15E-03 | 198.0      | 208.0      | 198.6      | 188.1       | 178.9       | 164.7       | 166.5       | 167.5   | 140.6   | 130.1   | 156.8    | 143.4    | 123.9    | 150.7    | 188.1         | 143.4      | 0.8         |
| 228791_at    | LOC100129502                                                             | 7.40E-04 | 486.1      | 530.2      | 870.4      | 794.3       | 773.7       | 604.4       | 466.7       | 411.2   | 276.0   | 241.1   | 402.1    | 328.6    | 194.8    | 138.6    | 604.4         | 276.0      | 0.5         |
| 229699_at    | LOC100129550                                                             | 1.21E-03 | 478.4      | 472.0      | 643.1      | 626.8       | 691.6       | 821.7       | 591.4       | 412.0   | 283.5   | 291.0   | 474.3    | 419.6    | 431.3    | 295.3    | 626.8         | 412.0      | 0.7         |
| 242364_x_at  | LOC100131096                                                             | 5.71E-03 | 673.5      | 674.6      | 730.7      | 740.2       | 627.4       | 844.2       | 708.5       | 511.7   | 514.2   | 296.7   | 524.3    | 536.5    | 527.9    | 507.8    | 708.5         | 514.2      | 0.7         |
| 228591_at    | LOC100131096                                                             | 7.59E-03 | 94.8       | 109.4      | 86.6       | 85.4        | 99.9        | 101.9       | 78.0        | 77.1    | 66.5    | 62.4    | 65.3     | 72.1     | 65.8     | 79.3     | 94.8          | 66.5       | 0.7         |
| 239062_at    | LOC100131096                                                             | 3.94E-03 | 112.6      | 86.9       | 204.5      | 202.8       | 152.1       | 188.1       | 177.9       | 106.4   | 45.4    | 53.3    | 98.3     | 102.9    | 111.1    | 55.2     | 177.9         | 98.3       | 0.6         |
| 230526_at    | LOC100131096                                                             | 8.55E-04 | 679.6      | 761.5      | 899.8      | 936.1       | 801.2       | 995.9       | 755.3       | 542.2   | 367.1   | 222.8   | 410.6    | 437.0    | 493.1    | 239.4    | 801.2         | 410.6      | 0.5         |
| 227074_at    | LOC100131564                                                             | 6.52E-03 | 275.9      | 435.2      | 473.1      | 383.8       | 306.9       | 232.2       | 469.6       | 299.0   | 299.1   | 296.6   | 305.4    | 194.7    | 130.9    | 259.5    | 383.8         | 296.6      | 0.8         |
| 1559514_at   | LOC100132077                                                             | 2.06E-03 | 76.1       | 79.6       | 137.7      | 106.1       | 132.9       | 137.0       | 146.7       | 63.0    | 65.9    | 82.3    | 84.4     | 87.5     | 82.9     | 94.8     | 132.9         | 82.9       | 0.6         |
| 214189_s_at  | LOC100288178                                                             | 1.62E-03 | 1283.8     | 1551.2     | 1243.6     | 1196.5      | 1119.8      | 1534.9      | 1215.1      | 1120.1  | 875.9   | 500.9   | 883.6    | 700.5    | 896.1    | 660.6    | 1243.6        | 875.9      | 0.7         |
| 213281_at    | LOC100288387                                                             | 6.87E-03 | 851.9      | 1024.7     | 866.2      | 889.7       | 816.9       | 907.1       | 1012.3      | 788.3   | 730.4   | 616.9   | 731.8    | 593.4    | 796.5    | 708.5    | 889.7         | 730.4      | 0.8         |
| 231422_x_at  | LOC100288438                                                             | 9.35E-03 | 420.2      | 417.9      | 465.0      | 497.4       | 430.0       | 521.5       | 371.6       | 460.6   | 286.0   | 205.4   | 297.9    | 344.2    | 349.9    | 219.5    | 430.0         | 297.9      | 0.7         |
| 213789_at    | LOC100292959                                                             | 7.27E-03 | 765.5      | 682.7      | 536.1      | 553.6       | 540.0       | 587.4       | 582.2       | 685.9   | 399.7   | 277.7   | 437.1    | 461.1    | 477.0    | 344.9    | 582.2         | 437.1      | 0.8         |
| 1563431_x_at | LOC100293219                                                             | 6.74E-03 | 2194.8     | 2164.1     | 2355.6     | 2555.6      | 2084.7      | 2355.3      | 2149.1      | 1934.5  | 1750.8  | 1554.7  | 2112.1   | 1709.2   | 1583.7   | 1752.9   | 2194.8        | 1750.8     | 0.8         |
| 231258_at    | LOC100293390                                                             | 5.65E-03 | 1134.2     | 974.5      | 1138.3     | 990.9       | 1045.3      | 1030.1      | 942.9       | 949.2   | 739.8   | 687.0   | 696.8    | 896.3    | 900.8    | 663.1    | 1030.1        | 739.8      | 0.7         |
| 220219_s_at  | LOC100294335<br>LOC644397<br>LRRC37A<br>LRRC37A2<br>LRRC37A3<br>LRRC37A4 | 4.54E-03 | 1479.1     | 1036.9     | 838.7      | 1192.4      | 869.6       | 1210.6      | 918.2       | 1122.8  | 719.1   | 533.4   | 882.2    | 770.5    | 1058.9   | 690.0    | 1036.9        | 770.5      | 0.7         |
| 240298_at    | LOC147791                                                                | 4.15E-03 | 88.6       | 86.0       | 112.8      | 128.4       | 103.2       | 135.4       | 103.3       | 99.7    | 54.6    | 51.8    | 73.2     | 68.0     | 64.6     | 53.2     | 103.3         | 64.6       | 0.6         |
| 212098_at    | LOC151162<br>MGAT5                                                       | 1.18E-04 | 1047.8     | 1012.4     | 882.6      | 1052.2      | 937.0       | 846.7       | 809.4       | 777.7   | 610.7   | 502.7   | 642.7    | 559.9    | 538.5    | 486.9    | 937.0         | 559.9      | 0.6         |
| 213776_at    | LOC157562                                                                | 8.97E-03 | 93.0       | 105.7      | 82.4       | 74.3        | 110.9       | 94.2        | 95.4        | 78.2    | 80.9    | 79.6    | 61.6     | 72.9     | 65.1     | 55.6     | 94.2          | 72.9       | 0.8         |
| 236832_at    | LOC221442                                                                | 9.30E-03 | 96.3       | 134.6      | 165.5      | 128.1       | 141.4       | 134.2       | 134.1       | 92.4    | 94.8    | 106.0   | 115.1    | 115.1    | 98.6     | 86.7     | 134.2         | 98.6       | 0.7         |
| 235132_at    | LOC254128                                                                | 8.30E-03 | 383.5      | 412.1      | 551.2      | 498.9       | 440.7       | 557.9       | 378.9       | 367.4   | 329.9   | 330.4   | 410.5    | 343.2    | 346.0    | 287.2    | 440.7         | 343.2      | 0.8         |
| 236574_at    | LOC284373                                                                | 4.69E-03 | 50.0       | 68.1       | 56.7       | 57.9        | 73.2        | 67.7        | 56.0        | 49.5    | 47.0    | 41.7    | 38.6     | 51.2     | 50.8     | 42.8     | 57.9          | 47.0       | 0.8         |
| 1563088_a_at | LOC284837                                                                | 2.23E-04 | 541.3      | 785.7      | 691.0      | 768.5       | 450.4       | 598.2       | 304.1       | 394.9   | 389.4   | 300.7   | 358.9    | 289.5    | 283.3    | 187.0    | 598.2         | 300.7      | 0.5         |
| 244189_at    | LOC284900                                                                | 2.93E-03 | 415.9      | 424.4      | 492.0      | 472.0       | 464.9       | 458.1       | 356.6       | 364.2   | 321.0   | 289.2   | 350.7    | 347.2    | 325.6    | 277.4    | 458.1         | 325.6      | 0.7         |
| 235584_at    | LOC285033                                                                | 9.23E-03 | 198.5      | 201.8      | 191.0      | 178.7       | 218.3       | 196.9       | 175.6       | 172.6   | 167.0   | 113.6   | 155.0    | 177.5    | 157.1    | 109.6    | 196.9         | 157.1      | 0.8         |
| 1561334_at   | LOC285181                                                                | 5.68E-04 | 368.5      | 275.9      | 437.6      | 436.1       | 375.9       | 334.4       | 352.8       | 283.0   | 171.6   | 239.7   | 206.4    | 188.1    | 255.8    | 191.4    | 368.5         | 206.4      | 0.6         |
| 236321_at    | LOC285550                                                                | 2.96E-03 | 73.3       | 76.5       | 88.9       | 89.2        | 105.9       | 118.3       | 130.4       | 67.2    | 57.7    | 31.7    | 56.1     | 62.2     | 49.3     | 56.7     | 89.2          | 56.7       | 0.6         |
| 227270_at    | LOC285550                                                                | 6.22E-03 | 213.8      | 318.9      | 330.1      | 391.7       | 345.7       | 435.0       | 406.5       | 247.2   | 212.4   | 180.1   | 260.7    | 213.4    | 214.0    | 175.5    | 345.7         | 213.4      | 0.6         |
| 238263_at    | LOC285965                                                                | 3.79E-03 | 78.5       | 191.7      | 230.1      | 165.5       | 135.1       | 286.9       | 203.0       | 73.5    | 127.4   | 149.9   | 143.1    | 70.4     | 177.4    | 114.0    | 191.7         | 127.4      | 0.7         |
| 229015_at    | LOC286367                                                                | 3.11E-03 | 81.7       | 114.1      | 110.0      | 106.9       | 84.5        | 115.0       | 80.1        | 79.5    | 71.9    | 66.4    | 62.1     | 68.3     | 64.7     | 38.9     | 106.9         | 66.4       | 0.6         |
| 1556266_a_at | LOC400831                                                                | 4.37E-03 | 117.5      | 114.7      | 94.0       | 98.8        | 97.1        | 150.9       | 107.7       | 96.5    | 74.5    | 77.0    | 71.0     | 82.7     | 124.5    | 75.9     | 107.7         | 77.0       | 0.7         |
| 1557124_at   | LOC440104                                                                | 9.97E-03 | 133.3      | 131.9      | 109.9      | 88.7        | 88.1        | 112.1       | 91.5        | 108.8   | 93.5    | 61.2    | 63.2     | 82.7     | 75.1     | 83.4     | 109.9         | 82.7       | 0.8         |
| 227106_at    | LOC440104                                                                | 8.26E-03 | 147.4      | 181.3      | 222.3      | 223.3       | 179.9       | 233.5       | 169.6       | 153.6   | 101.6   | 77.4    | 159.8    | 146.5    | 124.7    | 78.7     | 181.3         | 124.7      | 0.7         |
| 238511_at    | LOC440288                                                                | 1.53E-03 | 95.1       | 102.3      | 59.7       | 104.0       | 97.9        | 94.6        | 83.5        | 54.4    | 50.0    | 45.2    | 48.4     | 58.5     | 46.5     | 75.9     | 95.1          | 50.0       | 0.5         |
| 229826_at    | LOC440957                                                                | 5.68E-03 | 202.4      | 196.4      | 194.7      | 200.7       | 189.3       | 182.3       | 169.8       | 157.7   | 126.7   | 140.9   | 141.9    | 148.8    | 176.1    | 131.5    | 194.7         | 141.9      | 0.7         |
| 230595_at    | LOC572558                                                                | 4.55E-03 | 87.1       | 67.2       | 75.6       | 70.5        | 75.3        | 84.3        | 68.0        | 74.1    | 54.5    | 55.6    | 55.0     | 59.0     | 58.4     | 57.8     | 75.3          | 57.8       | 0.8         |
| 228908_s_at  | LOC642852                                                                | 1.57E-03 | 146.2      | 175.5      | 204.4      | 194.7       | 167.9       | 182.0       | 176.9       | 115.1   | 118.8   | 97.2    | 117.6    | 95.6     | 121.4    | 59.9     | 176.9         | 115.1      | 0.7         |
| 226995_at    | LOC642852                                                                | 6.42E-04 | 104.3      | 101.9      | 99.0       | 110.3       | 96.0        | 116.8       | 95.8        | 57.9    | 71.0    | 82.4    | 72.0     | 55.0     | 65.4     | 65.4     | 101.9         | 65.4       | 0.6         |
| 228909_at    | LOC642852                                                                | 7.57E-03 | 69.7       | 121.3      | 137.9      | 108.1       | 98.6        | 101.4       | 76.1        | 78.2    | 67.9    | 45.6    | 75.8     | 62.5     | 55.1     | 43.0     | 101.4         | 62.5       | 0.6         |
| 229857_s_at  | LOC644246                                                                | 8.37E-03 | 323.4      | 676.9      | 630.0      | 210.8       | 673.4       | 385.0       | 238.9       | 348.5   | 523.7   | 445.6   | 156.7    | 469.7    | 243.6    | 143.0    | 385.0         | 348.5      | 0.9         |

Continued

TRANSCRIPTION PROFILES IN ALVEOLAR MACROPHAGES

Supplementary Table S2. Continued.

| ID           | Gene Symbol | p-value  | VW3_Saline | VW6_Saline | VW7_Saline | VW13_Saline | VW22_Saline | VW23_Saline | VW25_Saline | VW3_LPS | VW6_LPS | VW7_LPS | VW13_LPS | VW22_LPS | VW23_LPS | VW25_LPS | Median_saline | Median_LPS | Fold change |
|--------------|-------------|----------|------------|------------|------------|-------------|-------------|-------------|-------------|---------|---------|---------|----------|----------|----------|----------|---------------|------------|-------------|
| 1564200_at   | LOC646324   | 9.31E-03 | 125.1      | 101.9      | 89.8       | 140.4       | 68.0        | 82.2        | 81.2        | 114.7   | 61.7    | 54.3    | 116.9    | 55.1     | 48.7     | 71.4     | 89.8          | 61.7       | 0.7         |
| 218380_at    | LOC728392   | 4.35E-04 | 322.3      | 422.9      | 431.6      | 448.9       | 335.5       | 411.8       | 312.9       | 247.2   | 259.8   | 161.5   | 250.4    | 190.0    | 241.5    | 152.3    | 411.8         | 241.5      | 0.6         |
|              | /// NLRP1   |          |            |            |            |             |             |             |             |         |         |         |          |          |          |          |               |            |             |
| 224623_at    | LOC728554   | 2.65E-03 | 1214.2     | 845.3      | 994.5      | 1163.3      | 1132.6      | 970.4       | 866.5       | 1060.4  | 568.9   | 549.7   | 950.2    | 766.3    | 726.1    | 591.1    | 994.5         | 726.1      | 0.7         |
|              | /// THOC3   |          |            |            |            |             |             |             |             |         |         |         |          |          |          |          |               |            |             |
| 1568763_s_at | LOC728613   | 4.93E-03 | 927.4      | 467.8      | 1213.7     | 1497.1      | 718.4       | 855.2       | 854.0       | 707.4   | 350.6   | 1123.7  | 1263.9   | 465.7    | 635.9    | 569.5    | 855.2         | 635.9      | 0.7         |
|              | /// PDCC6   |          |            |            |            |             |             |             |             |         |         |         |          |          |          |          |               |            |             |
| 1564474_at   | LOC728723   | 4.26E-03 | 52.7       | 21.0       | 120.6      | 138.7       | 131.6       | 119.1       | 56.3        | 53.8    | 10.7    | 26.5    | 91.4     | 45.9     | 55.7     | 26.5     | 119.1         | 45.9       | 0.4         |
| 242313_at    | LOC728730   | 2.51E-03 | 42.9       | 58.7       | 90.9       | 57.8        | 60.8        | 78.0        | 72.5        | 30.7    | 35.4    | 19.5    | 43.6     | 29.9     | 25.8     | 28.0     | 60.8          | 29.9       | 0.5         |
| 237556_at    | LOC728804   | 9.11E-03 | 121.5      | 213.3      | 1296.5     | 2326.7      | 228.2       | 279.6       | 1545.3      | 171.4   | 97.8    | 321.2   | 1052.0   | 138.7    | 136.9    | 474.2    | 279.6         | 171.4      | 0.6         |
| 235010_at    | LOC729013   | 5.31E-03 | 391.5      | 386.2      | 461.7      | 415.8       | 274.6       | 613.5       | 473.2       | 346.7   | 314.6   | 293.4   | 371.8    | 190.7    | 368.5    | 279.0    | 415.8         | 314.6      | 0.8         |
| 225332_at    | LOC729082   | 2.59E-03 | 227.7      | 230.8      | 261.0      | 258.5       | 311.8       | 373.2       | 332.4       | 223.5   | 135.9   | 106.7   | 191.2    | 178.9    | 177.8    | 155.2    | 261.0         | 177.8      | 0.7         |
| 225225_at    | LOC729082   | 5.59E-03 | 539.2      | 723.5      | 914.3      | 760.1       | 934.5       | 1127.0      | 1244.0      | 589.0   | 481.5   | 367.6   | 557.7    | 511.9    | 486.2    | 489.2    | 914.3         | 489.2      | 0.5         |
| 230952_at    | LOC730092   | 2.69E-03 | 332.1      | 531.1      | 265.0      | 123.8       | 362.5       | 400.8       | 123.2       | 231.3   | 229.6   | 109.2   | 98.4     | 264.8    | 209.4    | 94.2     | 332.1         | 209.4      | 0.6         |
| 236905_at    | LOC731139   | 8.30E-03 | 70.9       | 58.5       | 52.4       | 72.4        | 73.1        | 69.9        | 68.5        | 57.4    | 51.2    | 42.7    | 64.3     | 55.8     | 55.6     | 48.1     | 69.9          | 55.6       | 0.8         |
| 220465_at    | LOC80054    | 6.58E-03 | 111.9      | 88.0       | 118.0      | 103.0       | 93.7        | 111.7       | 86.3        | 78.7    | 70.3    | 56.3    | 75.7     | 70.6     | 72.7     | 80.8     | 103.0         | 72.7       | 0.7         |
| 226842_at    | LOC90110    | 9.71E-04 | 289.6      | 372.1      | 367.3      | 359.8       | 397.0       | 416.5       | 304.1       | 263.0   | 204.9   | 180.8   | 213.7    | 263.8    | 260.3    | 151.6    | 367.3         | 213.7      | 0.6         |
| 225391_at    | LOC93622    | 5.80E-03 | 338.6      | 473.1      | 425.4      | 362.5       | 367.5       | 483.8       | 336.5       | 300.1   | 240.5   | 140.7   | 335.8    | 251.8    | 198.7    | 138.2    | 367.5         | 240.5      | 0.7         |
| 206723_s_at  | LPAR2       | 7.63E-03 | 234.7      | 371.6      | 324.4      | 311.2       | 343.0       | 353.4       | 309.2       | 221.2   | 275.5   | 219.5   | 247.9    | 298.9    | 243.3    | 238.3    | 324.4         | 243.3      | 0.8         |
| 213078_x_at  | LPCAT4      | 2.94E-03 | 163.9      | 157.6      | 165.6      | 180.3       | 129.6       | 144.8       | 145.3       | 130.5   | 123.8   | 83.1    | 100.6    | 99.3     | 116.5    | 85.2     | 157.6         | 100.6      | 0.6         |
| 40472_at     | LPCAT4      | 4.01E-03 | 196.3      | 185.1      | 184.6      | 208.6       | 139.5       | 164.2       | 140.9       | 161.2   | 128.2   | 72.1    | 102.9    | 123.3    | 102.3    | 83.9     | 184.6         | 102.9      | 0.6         |
| 235126_at    | LQK1        | 4.86E-03 | 200.6      | 193.0      | 205.0      | 313.2       | 511.9       | 267.7       | 286.8       | 208.1   | 127.9   | 102.5   | 241.7    | 317.9    | 167.8    | 138.4    | 267.7         | 167.8      | 0.6         |
| 219491_at    | LRFN4       | 2.09E-03 | 192.7      | 188.5      | 205.8      | 219.1       | 214.5       | 233.2       | 175.4       | 164.1   | 122.9   | 165.7   | 140.6    | 152.3    | 164.9    | 137.9    | 205.8         | 152.3      | 0.7         |
| 1555353_at   | LRP1        | 8.95E-03 | 93.6       | 107.8      | 80.6       | 95.9        | 87.3        | 89.7        | 82.4        | 60.2    | 70.2    | 56.5    | 79.4     | 67.4     | 94.0     | 56.6     | 89.7          | 67.4       | 0.8         |
| 1569042_at   | LRP1        | 5.17E-03 | 59.1       | 57.7       | 68.2       | 78.3        | 75.5        | 79.5        | 74.7        | 53.7    | 38.7    | 42.5    | 64.0     | 51.4     | 69.1     | 52.0     | 74.7          | 52.0       | 0.7         |
| 200785_s_at  | LRP1        | 7.23E-03 | 251.0      | 202.5      | 236.3      | 298.0       | 293.0       | 298.7       | 312.8       | 214.4   | 141.5   | 120.9   | 202.6    | 266.8    | 249.2    | 198.6    | 293.0         | 202.6      | 0.7         |
| 200784_s_at  | LRP1        | 9.39E-03 | 695.6      | 549.2      | 560.0      | 810.3       | 708.0       | 703.5       | 669.6       | 464.3   | 300.2   | 343.9   | 436.4    | 656.4    | 712.1    | 484.9    | 695.6         | 464.3      | 0.7         |
| 201186_at    | LRPAP1      | 7.57E-03 | 4613.1     | 4708.4     | 4285.2     | 4201.0      | 3811.0      | 4091.7      | 3564.9      | 3694.8  | 3657.8  | 3044.4  | 3284.5   | 3450.2   | 3585.2   | 2727.2   | 4201.0        | 3450.2     | 0.8         |
| 230793_at    | LRRC16A     | 1.98E-03 | 318.5      | 536.6      | 337.5      | 351.2       | 177.1       | 173.0       | 332.5       | 223.6   | 321.6   | 102.2   | 230.7    | 120.0    | 114.6    | 170.3    | 332.5         | 170.3      | 0.5         |
| 220220_at    | LRRC37A4    | 7.85E-03 | 209.1      | 124.3      | 122.6      | 434.9       | 120.9       | 332.4       | 236.9       | 212.3   | 64.0    | 95.1    | 310.0    | 90.1     | 244.5    | 133.5    | 209.1         | 133.5      | 0.6         |
| 218684_at    | LRRC8D      | 2.56E-03 | 2143.1     | 2724.2     | 2336.2     | 2240.4      | 2032.0      | 2240.3      | 1761.8      | 1660.9  | 1809.6  | 921.4   | 1790.4   | 1360.2   | 1431.9   | 1103.1   | 2240.3        | 1431.9     | 0.6         |
| 212924_s_at  | LSM4        | 3.46E-03 | 2002.0     | 1775.6     | 1862.2     | 1952.1      | 1724.6      | 1923.2      | 1646.2      | 1561.9  | 1257.7  | 951.9   | 1360.7   | 1479.8   | 1489.4   | 1171.1   | 1862.2        | 1360.7     | 0.7         |
| 202737_s_at  | LSM4        | 1.78E-03 | 2044.7     | 1881.4     | 1999.7     | 2127.1      | 1832.8      | 2004.0      | 1758.2      | 1567.9  | 1415.3  | 1050.2  | 1358.2   | 1332.8   | 1635.9   | 1195.6   | 1999.7        | 1358.2     | 0.7         |
| 208771_s_at  | LTA4H       | 5.74E-03 | 12444.7    | 12213.9    | 12669.6    | 12614.2     | 12366.7     | 12756.6     | 11516.2     | 10619.2 | 10083.1 | 6863.1  | 9883.1   | 9746.5   | 9952.7   | 7222.4   | 12444.7       | 9883.1     | 0.8         |
| 221831_at    | LUZP1       | 7.25E-03 | 389.5      | 421.0      | 520.6      | 491.2       | 426.3       | 389.4       | 452.8       | 334.1   | 294.6   | 420.2   | 405.3    | 249.3    | 284.0    | 396.6    | 426.3         | 334.1      | 0.8         |
| 223414_s_at  | LYAR        | 6.36E-03 | 1617.3     | 939.1      | 1023.5     | 1004.8      | 1003.0      | 1026.3      | 896.6       | 1049.4  | 808.0   | 658.1   | 714.7    | 734.5    | 862.7    | 819.9    | 1004.8        | 808.0      | 0.8         |
| 218437_s_at  | LZTFL1      | 1.92E-03 | 652.7      | 617.5      | 787.9      | 713.7       | 867.8       | 761.0       | 716.0       | 513.5   | 472.1   | 251.4   | 403.9    | 502.7    | 440.5    | 326.2    | 716.0         | 440.5      | 0.6         |
| 206363_at    | MAF         | 3.28E-03 | 607.7      | 400.0      | 633.1      | 471.0       | 534.7       | 379.1       | 425.2       | 346.3   | 268.2   | 188.5   | 304.8    | 357.2    | 314.3    | 215.0    | 471.0         | 304.8      | 0.6         |
| 209348_s_at  | MAF         | 1.75E-03 | 349.7      | 356.9      | 582.8      | 493.3       | 535.8       | 465.7       | 483.0       | 298.5   | 237.5   | 202.8   | 346.4    | 279.5    | 236.4    | 215.2    | 483.0         | 237.5      | 0.5         |
| 218176_at    | MAGEF1      | 5.91E-03 | 133.9      | 91.8       | 126.9      | 125.7       | 76.3        | 93.8        | 80.7        | 99.1    | 80.4    | 67.8    | 103.6    | 53.0     | 77.5     | 58.5     | 93.8          | 77.5       | 0.8         |
| 202032_s_at  | MAN2A2      | 8.98E-04 | 2223.4     | 2072.5     | 2143.2     | 2238.9      | 2072.6      | 2180.3      | 1957.5      | 1727.0  | 1518.5  | 1113.2  | 1506.8   | 1386.0   | 1619.0   | 1224.8   | 2143.2        | 1506.8     | 0.7         |
| 219999_at    | MAN2A2      | 3.99E-03 | 237.0      | 213.2      | 302.6      | 317.7       | 280.5       | 321.7       | 275.0       | 230.6   | 134.1   | 142.2   | 203.0    | 227.0    | 194.9    | 130.3    | 280.5         | 194.9      | 0.7         |
| 203778_at    | MANBA       | 7.18E-04 | 2862.2     | 3397.0     | 3055.0     | 3208.7      | 3387.4      | 2959.9      | 2849.5      | 2115.7  | 2483.0  | 1438.9  | 2271.9   | 2157.6   | 1940.5   | 1653.3   | 3055.0        | 2115.7     | 0.7         |
| 214786_at    | MAP3K1      | 3.95E-03 | 413.0      | 451.2      | 532.0      | 593.8       | 511.4       | 572.7       | 456.6       | 409.9   | 277.0   | 242.4   | 429.0    | 354.9    | 322.0    | 307.3    | 511.4         | 322.0      | 0.6         |
| 225927_at    | MAP3K1      | 4.46E-03 | 1195.3     | 1664.9     | 1872.0     | 1863.6      | 1706.9      | 2063.7      | 1745.1      | 1091.7  | 1133.6  | 747.8   | 1582.2   | 1012.2   | 1029.4   | 1029.5   | 1745.1        | 1029.5     | 0.6         |
| 205447_s_at  | MAP3K12     | 1.91E-03 | 78.4       | 86.6       | 84.7       | 76.0        | 89.2        | 86.5        | 80.8        | 70.6    | 51.1    | 49.2    | 60.3     | 60.0     | 47.6     | 40.1     | 84.7          | 51.1       | 0.6         |
| 226441_at    | MAP3K2      | 3.14E-03 | 1022.0     | 1129.3     | 1347.2     | 1448.5      | 1641.8      | 1583.4      | 1668.6      | 894.0   | 839.8   | 793.8   | 1223.0   | 972.9    | 1173.0   | 1067.0   | 1448.5        | 972.9      | 0.7         |
| 227131_at    | MAP3K3      | 4.63E-03 | 202.0      | 169.3      | 251.5      | 249.0       | 278.6       | 252.9       | 161.7       | 170.0   | 119.9   | 131.0   | 149.5    | 238.2    | 175.5    | 132.0    | 249.0         | 149.5      | 0.6         |
| 216199_s_at  | MAP3K4      | 7.09E-03 | 360.1      | 347.3      | 386.4      | 394.9       | 398.5       | 348.3       | 338.7       | 355.0   | 263.9   | 253.3   | 307.2    | 288.8    | 284.6    | 238.7    | 360.1         | 284.6      | 0.8         |
| 203901_at    | MAP3K7IP1   | 5.85E-03 | 74.2       | 66.8       | 99.0       | 91.7        | 86.6        | 91.6        | 92.0        | 68.1    | 53.6    | 54.0    | 68.9     | 66.4     | 70.9     | 59.0     | 91.6          | 66.4       | 0.7         |
| 212566_at    | MAP4        | 9.05E-03 | 2471.4     | 2446.4     | 1999.4     | 2180.8      | 2142.5      | 2203.1      | 2270.5      | 2426.7  | 1760.4  | 1226.5  | 1845.5   | 1430.0   | 1873.5   | 1474.8   | 2203.1        | 1760.4     | 0.8         |
| 202530_at    | MAPK14      | 5.08E-03 | 1698.4     | 1624.7     | 1639.5     | 2132.5      | 1815.5      | 2270.1      | 1991.6      | 1367.9  | 1333.3  | 999.0   | 1909.1   | 1157.7   | 1828.2   | 1357.8   | 1815.5        | 1357.8     | 0.7         |
| 202788_at    | MAPKAPK3    | 5.53E-03 | 2465.2     | 2190.1     | 2333.1     | 2572.9      | 2158.6      | 2413.1      | 2246.0      | 2152.1  | 1620.4  | 1426.2  | 2028.4   | 1779.0   | 2008.0   | 1635.1   | 2333.1        | 1779.0     | 0.8         |
| 223095_at    | MARVELD1    | 2.38E-03 | 639.8      | 724.0      | 509.2      | 584.3       | 608.3       | 557.1       | 515.3       | 500.9   | 345.7   | 130.7   |          |          |          |          |               |            |             |



Supplementary Table S2. Continued.

| ID           | Gene Symbol        | p-value  | VW3_Saline | VW6_Saline | VW7_Saline | VW13_Saline | VW22_Saline | VW23_Saline | VW25_Saline | VW3_LPS | VW6_LPS | VW7_LPS | VW13_LPS | VW22_LPS | VW23_LPS | VW25_LPS | Median_saline | Median_LPS | Fold change |
|--------------|--------------------|----------|------------|------------|------------|-------------|-------------|-------------|-------------|---------|---------|---------|----------|----------|----------|----------|---------------|------------|-------------|
| 210136_at    | MBP                | 2.41E-03 | 2205.4     | 2077.0     | 2131.3     | 2358.0      | 2008.3      | 2307.5      | 1676.4      | 1968.4  | 1437.0  | 803.9   | 1282.0   | 1472.2   | 1237.9   | 867.0    | 2131.3        | 1282.0     | 0.6         |
| 226797_at    | MBTD1              | 6.71E-03 | 345.0      | 561.4      | 684.2      | 579.0       | 668.0       | 738.0       | 592.0       | 369.9   | 368.1   | 319.9   | 479.0    | 406.0    | 366.7    | 267.0    | 592.0         | 368.1      | 0.6         |
| 243552_at    | MBTD1              | 9.69E-03 | 94.0       | 130.1      | 170.0      | 169.0       | 187.4       | 202.9       | 126.8       | 112.8   | 95.6    | 101.3   | 120.0    | 107.4    | 101.3    | 72.0     | 169.0         | 101.3      | 0.6         |
| 202107_s_at  | MCM2               | 2.22E-03 | 249.4      | 224.5      | 198.7      | 224.5       | 188.7       | 182.5       | 205.5       | 217.0   | 143.4   | 104.3   | 184.7    | 125.7    | 108.7    | 145.1    | 205.5         | 143.4      | 0.7         |
| 201555_at    | MCM3               | 8.65E-03 | 646.1      | 577.2      | 556.3      | 623.9       | 516.0       | 502.8       | 449.4       | 548.5   | 415.9   | 303.6   | 551.8    | 414.7    | 403.1    | 340.4    | 556.3         | 414.7      | 0.7         |
| 222037_at    | MCM4               | 7.74E-04 | 368.0      | 392.6      | 346.8      | 402.2       | 317.8       | 303.4       | 346.3       | 312.4   | 234.0   | 188.9   | 303.2    | 190.2    | 185.1    | 215.8    | 346.8         | 215.8      | 0.6         |
| 222036_s_at  | MCM4               | 9.84E-03 | 149.4      | 204.2      | 252.0      | 307.2       | 224.0       | 268.5       | 291.6       | 176.0   | 156.5   | 138.7   | 229.3    | 112.7    | 137.0    | 138.3    | 252.0         | 138.7      | 0.6         |
| 201930_at    | MCM6               | 7.45E-03 | 238.9      | 278.6      | 297.2      | 311.5       | 284.9       | 282.5       | 254.3       | 278.0   | 161.4   | 134.1   | 245.6    | 171.7    | 140.9    | 139.0    | 282.5         | 161.4      | 0.6         |
| 224320_s_at  | MCM8               | 6.24E-03 | 83.8       | 93.6       | 93.1       | 100.8       | 99.8        | 102.7       | 93.3        | 82.2    | 64.1    | 55.2    | 86.8     | 59.2     | 76.9     | 50.7     | 93.6          | 64.1       | 0.7         |
| 219952_s_at  | MCOLN1             | 4.49E-03 | 799.5      | 638.9      | 908.2      | 700.0       | 596.7       | 647.5       | 663.3       | 513.6   | 448.9   | 310.3   | 353.4    | 518.7    | 513.9    | 351.9    | 663.3         | 448.9      | 0.7         |
| 200978_at    | MDH1               | 4.80E-03 | 2203.4     | 2474.1     | 2238.6     | 2101.7      | 2126.3      | 2553.2      | 2106.8      | 1989.8  | 1788.7  | 1522.3  | 1879.7   | 1620.6   | 1635.7   | 1432.7   | 2203.4        | 1635.7     | 0.7         |
| 212693_at    | MDN1               | 8.05E-03 | 256.1      | 284.7      | 296.1      | 322.7       | 342.4       | 363.0       | 331.7       | 232.7   | 220.2   | 217.6   | 289.2    | 182.6    | 237.4    | 244.3    | 322.7         | 232.7      | 0.7         |
| 204058_at    | ME1                | 3.73E-03 | 69.0       | 85.2       | 125.3      | 129.7       | 139.8       | 120.1       | 127.0       | 68.0    | 58.1    | 92.7    | 94.3     | 83.8     | 69.7     | 64.5     | 125.3         | 69.7       | 0.6         |
| 226958_s_at  | MED11              | 6.75E-03 | 1874.1     | 1356.7     | 1589.3     | 1763.5      | 1823.8      | 1856.4      | 1535.5      | 1584.1  | 1055.9  | 988.2   | 1310.5   | 1549.7   | 1614.6   | 1167.6   | 1763.5        | 1310.5     | 0.7         |
| 212872_s_at  | MED20              | 9.85E-03 | 356.4      | 405.1      | 384.5      | 389.5       | 404.6       | 505.8       | 336.2       | 365.1   | 263.3   | 258.7   | 346.3    | 289.6    | 330.2    | 253.2    | 389.5         | 289.6      | 0.7         |
| 222447_at    | METTL9             | 6.14E-03 | 117.5      | 126.2      | 288.2      | 236.0       | 183.9       | 307.6       | 247.0       | 93.2    | 94.5    | 201.3   | 185.3    | 171.8    | 209.3    | 205.7    | 236.0         | 185.3      | 0.8         |
| 204163_s_at  | MFNG               | 2.09E-03 | 1063.2     | 1332.5     | 1090.2     | 1201.4      | 1019.8      | 1212.6      | 1012.3      | 937.5   | 866.0   | 508.0   | 776.7    | 737.6    | 880.4    | 611.9    | 1090.2        | 776.7      | 0.7         |
| 225325_at    | MFSD6              | 5.82E-04 | 2541.6     | 2808.9     | 2844.0     | 2329.5      | 2145.5      | 2705.3      | 2964.8      | 1946.7  | 2045.7  | 1535.0  | 1537.7   | 1357.1   | 1863.8   | 2081.9   | 2705.3        | 1863.8     | 0.7         |
| 213403_at    | MFSD9              | 6.06E-03 | 223.9      | 242.4      | 274.9      | 244.2       | 232.2       | 232.3       | 199.2       | 220.2   | 157.5   | 120.7   | 210.9    | 135.0    | 154.7    | 111.3    | 232.3         | 154.7      | 0.7         |
| 230848_s_at  | MGA                | 9.59E-03 | 803.1      | 955.1      | 1172.7     | 1311.0      | 1409.3      | 1438.2      | 1319.9      | 780.0   | 801.4   | 748.7   | 1090.9   | 792.5    | 981.8    | 1009.1   | 1311.0        | 801.4      | 0.6         |
| 209764_at    | MGAT3              | 9.51E-03 | 677.2      | 691.7      | 754.6      | 912.7       | 657.7       | 801.7       | 799.0       | 646.7   | 573.3   | 480.1   | 615.5    | 398.9    | 742.0    | 512.5    | 754.6         | 573.3      | 0.8         |
| 231283_at    | MGAT4A             | 3.10E-04 | 786.2      | 1071.0     | 916.8      | 909.5       | 878.7       | 1126.0      | 737.4       | 583.2   | 639.2   | 432.4   | 600.6    | 593.4    | 610.7    | 372.8    | 909.5         | 593.4      | 0.7         |
| 219797_at    | MGAT4A             | 4.01E-03 | 584.8      | 911.2      | 879.2      | 709.7       | 780.2       | 1020.4      | 735.3       | 498.8   | 569.8   | 459.5   | 693.1    | 395.7    | 500.2    | 312.4    | 780.2         | 498.8      | 0.6         |
| 226039_at    | MGAT4A             | 3.59E-03 | 1108.8     | 1646.0     | 1650.0     | 1327.6      | 1486.2      | 1853.6      | 1277.0      | 970.7   | 1010.9  | 594.7   | 1140.8   | 870.5    | 850.8    | 534.4    | 1486.2        | 870.5      | 0.6         |
| 1556154_a_at | MGC23284           | 7.39E-03 | 119.0      | 175.2      | 110.3      | 122.0       | 69.7        | 197.4       | 143.8       | 114.7   | 105.8   | 36.8    | 79.0     | 58.2     | 82.6     | 42.6     | 122.0         | 79.0       | 0.6         |
| 204168_at    | MGST2              | 6.60E-04 | 1080.1     | 2376.0     | 2406.4     | 2441.2      | 1720.3      | 2382.9      | 2067.1      | 853.5   | 1569.3  | 1167.7  | 1611.0   | 1187.5   | 1155.4   | 1138.9   | 2376.0        | 1167.7     | 0.5         |
| 218376_s_at  | MICAL1             | 4.16E-03 | 4296.2     | 3832.2     | 4233.1     | 3771.7      | 3616.1      | 3258.6      | 3019.0      | 2917.7  | 2534.0  | 2524.1  | 2217.7   | 3351.3   | 2839.9   | 2188.8   | 3771.7        | 2534.0     | 0.7         |
| 223411_at    | MIF4GD             | 5.65E-03 | 770.2      | 843.9      | 929.2      | 868.8       | 821.4       | 1033.0      | 772.7       | 711.4   | 602.7   | 413.8   | 608.0    | 683.7    | 613.4    | 507.2    | 843.9         | 608.0      | 0.7         |
| 231727_s_at  | MIF4GD             | 4.38E-03 | 246.0      | 428.0      | 552.8      | 449.9       | 349.5       | 532.8       | 356.0       | 244.5   | 210.8   | 162.7   | 280.4    | 249.8    | 283.7    | 148.8    | 428.0         | 244.5      | 0.6         |
| 1554874_at   | MIF7               | 4.01E-03 | 71.9       | 96.9       | 63.7       | 64.4        | 51.8        | 59.9        | 64.1        | 56.9    | 78.8    | 35.9    | 60.3     | 32.9     | 37.8     | 40.7     | 64.1          | 40.7       | 0.6         |
| 207233_s_at  | MIF7               | 1.11E-03 | 890.0      | 666.5      | 831.2      | 874.6       | 945.3       | 806.0       | 959.1       | 781.4   | 421.4   | 512.4   | 622.4    | 595.3    | 535.9    | 485.0    | 874.6         | 535.9      | 0.6         |
| 226066_at    | MIF7               | 1.35E-03 | 2360.7     | 1813.6     | 2670.0     | 2953.8      | 3078.9      | 2748.3      | 3171.7      | 1828.0  | 1447.7  | 1325.4  | 1881.4   | 1222.0   | 1519.1   | 1352.7   | 2748.3        | 1447.7     | 0.5         |
| 1570202_a_at | MKL2               | 7.48E-03 | 210.0      | 199.7      | 192.1      | 223.8       | 201.5       | 225.0       | 201.6       | 187.0   | 182.2   | 127.0   | 187.2    | 152.7    | 150.5    | 130.4    | 201.6         | 152.7      | 0.8         |
| 209467_s_at  | MKNK1              | 2.64E-03 | 1040.8     | 1180.4     | 1138.8     | 1529.0      | 1192.9      | 1347.8      | 1097.2      | 918.9   | 858.9   | 621.0   | 1270.4   | 747.5    | 908.4    | 710.8    | 1180.4        | 858.9      | 0.7         |
| 243256_at    | MKNK1              | 1.42E-03 | 448.5      | 593.4      | 573.2      | 1078.0      | 564.5       | 741.1       | 501.8       | 396.0   | 354.8   | 328.4   | 799.4    | 387.1    | 514.0    | 341.6    | 573.2         | 387.1      | 0.7         |
| 218071_s_at  | MKRN2              | 4.92E-03 | 456.4      | 419.4      | 566.4      | 523.4       | 538.0       | 582.9       | 458.7       | 428.9   | 346.8   | 356.7   | 420.9    | 328.3    | 400.2    | 321.0    | 523.4         | 356.7      | 0.7         |
| 200617_at    | MLEC               | 3.13E-03 | 636.9      | 525.3      | 502.2      | 533.7       | 448.7       | 486.8       | 552.0       | 475.5   | 367.8   | 282.5   | 429.2    | 377.1    | 393.2    | 353.1    | 525.3         | 377.1      | 0.7         |
| 229304_s_at  | MLF1IP             | 1.49E-03 | 384.5      | 415.9      | 476.1      | 382.3       | 392.3       | 451.5       | 388.8       | 322.9   | 284.8   | 267.5   | 305.0    | 267.6    | 266.2    | 204.7    | 392.3         | 267.6      | 0.7         |
| 218883_s_at  | MLF1IP             | 5.40E-03 | 157.6      | 177.9      | 214.1      | 209.1       | 216.4       | 164.2       | 187.2       | 161.0   | 137.0   | 94.5    | 144.4    | 88.1     | 98.4     | 101.6    | 187.2         | 101.6      | 0.5         |
| 218211_s_at  | MLPH               | 6.52E-04 | 1785.2     | 2390.0     | 2019.0     | 2189.6      | 1827.7      | 2543.0      | 2245.8      | 1370.6  | 1332.3  | 667.6   | 1318.2   | 880.6    | 1351.3   | 773.1    | 2189.6        | 1318.2     | 0.6         |
| 242082_at    | MMAB               | 9.67E-03 | 211.9      | 158.5      | 97.2       | 109.9       | 114.0       | 95.5        | 132.9       | 145.1   | 108.5   | 77.0    | 82.3     | 98.1     | 90.8     | 110.7    | 114.0         | 98.1       | 0.9         |
| 203414_at    | MMD                | 5.10E-03 | 5664.7     | 7742.2     | 7448.6     | 5931.8      | 6158.8      | 8189.1      | 7158.9      | 5224.2  | 6119.0  | 4161.6  | 5140.2   | 3838.5   | 5326.4   | 3943.6   | 7158.9        | 5140.2     | 0.7         |
| 203435_s_at  | MME                | 4.47E-03 | 2392.8     | 4024.9     | 3559.3     | 2693.4      | 2973.3      | 2132.9      | 2430.2      | 2501.3  | 2720.5  | 1941.7  | 2039.6   | 1934.4   | 1239.9   | 1555.3   | 2693.4        | 1941.7     | 0.7         |
| 203434_s_at  | MME                | 4.03E-03 | 1692.9     | 2945.1     | 3298.4     | 2317.7      | 2275.5      | 1635.5      | 2248.8      | 1548.7  | 2475.2  | 2284.6  | 1772.1   | 1314.0   | 910.8    | 1307.4   | 2275.5        | 1548.7     | 0.7         |
| 204574_s_at  | MMP19              | 1.37E-03 | 182.1      | 219.5      | 261.6      | 252.5       | 203.3       | 260.3       | 206.1       | 161.0   | 123.4   | 96.9    | 148.3    | 135.5    | 136.3    | 85.7     | 219.5         | 135.5      | 0.6         |
| 219265_at    | MOBK2B             | 9.74E-03 | 1371.2     | 1242.5     | 1310.7     | 1423.1      | 1190.6      | 1412.3      | 1311.7      | 1283.0  | 1130.8  | 575.0   | 938.5    | 724.2    | 927.3    | 1009.6   | 1311.7        | 938.5      | 0.7         |
| 226844_at    | MOBK2B             | 1.35E-03 | 498.0      | 612.2      | 638.0      | 742.9       | 576.3       | 760.7       | 604.3       | 462.6   | 353.9   | 175.7   | 386.0    | 209.7    | 323.4    | 267.3    | 612.2         | 323.4      | 0.5         |
| 229568_at    | MOBK2B             | 3.83E-03 | 131.4      | 145.4      | 225.9      | 228.0       | 173.7       | 245.3       | 198.7       | 122.9   | 106.6   | 64.0    | 141.5    | 79.0     | 67.7     | 69.6     | 198.7         | 79.0       | 0.4         |
| 1553062_at   | MOGAT1             | 5.26E-03 | 161.4      | 217.0      | 182.0      | 186.6       | 143.4       | 238.6       | 217.0       | 141.0   | 115.6   | 67.9    | 155.4    | 104.0    | 148.5    | 85.0     | 186.6         | 115.6      | 0.6         |
| 218853_s_at  | MOSPD1             | 4.26E-03 | 133.5      | 156.8      | 368.3      | 281.6       | 302.4       | 302.6       | 317.6       | 133.1   | 104.2   | 134.8   | 180.4    | 166.4    | 122.5    | 88.7     | 302.4         | 133.1      | 0.4         |
| 221895_at    | MOSPD2             | 3.84E-03 | 697.7      | 907.3      | 1000.2     | 1045.7      | 866.5       | 873.6       | 1203.6      | 648.1   | 714.0   | 576.2   | 803.3    | 487.4    | 534.7    | 555.0    | 907.3         | 576.2      | 0.6         |
| 64883_at     | MOSPD2             | 3.88E-03 | 231.5      | 301.9      | 424.5      | 476.5       | 377.9       | 405.3       | 471.1       | 227.3   | 208.8   | 253.4   | 353.3    | 213.5    | 243.6    | 198.3    | 405.3         | 227.3      | 0.6         |
| 219070_s_at  | MOSPD3             | 9.62E-03 | 214.2      | 180.1      | 201.0      | 211.4       | 188.5       | 192.7       | 203.0       | 192.8   | 139.6   | 156.4   | 144.5    | 158.3    | 174.7    | 140.9    | 201.0         | 156.4      | 0.8         |
| 203466_at    | MPV17              | 7.51E-03 | 1050.5     | 1043.0     | 935.4      | 1106.2      | 937.3       | 858.7       | 825.9       | 910.6   | 670.4   | 617.2   | 734.9    | 815.6    | 792.6    | 593.0    | 937.3         | 734.9      | 0.8         |
| 230518_at    | MPZL2              | 1.11E-03 | 199.4      | 349.0      | 251.7      | 272.7       | 232.6       | 231.0       | 171.4       | 164.8   | 179.3   | 102.0   | 163.4    | 169.3    | 116.7    | 66.7     | 232.6         | 163.4      | 0.7         |
| 203779_s_at  | MPZL2              | 5.65E-03 | 194.2      | 374.1      | 397.1      | 509.8       | 382.4       | 451.3       | 307.2       | 219.1   | 206.1   | 119.4   | 325.6    | 201.0    | 169.1    | 74.2     | 382.4         | 201.0      | 0.5         |
| 203780_at    | MPZL2              | 2.45E-03 | 218.0      | 320.6      | 400.3      | 471.1       | 416.0       | 495.0       | 317.5       | 180.3   | 207.3   | 117.4   | 305.4    | 172.0    | 159.3    | 71.4     | 400.3         | 172.0      | 0.4         |
| 204438_at    | MRC1 ///<br>MRC1L1 | 5.29E-03 | 6826.6     | 8320.9     | 9730.9     | 8602.1      | 9114.7      | 10289.7     | 8527.3      | 5766.3  | 6624.1  | 6645.1  | 7        |          |          |          |               |            |             |

TRANSCRIPTION PROFILES IN ALVEOLAR MACROPHAGES

Supplementary Table S2. Continued.

| ID          | Gene Symbol | p-value  | VW3_Saline | VW6_Saline | VW7_Saline | VW13_Saline | VW22_Saline | VW23_Saline | VW25_Saline | VW3_LPS | VW6_LPS | VW7_LPS | VW13_LPS | VW22_LPS | VW23_LPS | VW25_LPS | Median_saline | Median_LPS | Fold change |
|-------------|-------------|----------|------------|------------|------------|-------------|-------------|-------------|-------------|---------|---------|---------|----------|----------|----------|----------|---------------|------------|-------------|
| 226296_s_at | MRPS15      | 8.36E-03 | 2802.0     | 2866.5     | 2276.2     | 2570.1      | 2549.9      | 2664.5      | 1914.7      | 2531.1  | 2337.4  | 1599.5  | 1960.1   | 2089.0   | 2100.5   | 1640.6   | 2570.1        | 2089.0     | 0.8         |
| 224357_s_at | MS4A4A      | 2.57E-03 | 1954.3     | 2342.1     | 2008.0     | 2299.4      | 2172.2      | 2041.4      | 1941.5      | 1610.0  | 1825.6  | 1397.9  | 1897.0   | 1494.9   | 1636.8   | 1316.2   | 2041.4        | 1610.0     | 0.8         |
| 224356_x_at | MS4A6A      | 5.98E-04 | 3306.0     | 4240.9     | 3470.3     | 4973.2      | 4713.3      | 3189.4      | 1483.6      | 2275.0  | 2596.7  | 1635.0  | 3408.3   | 3395.6   | 1687.1   | 1060.7   | 3470.3        | 2275.0     | 0.7         |
| 230550_at   | MS4A6A      | 9.12E-04 | 362.4      | 603.8      | 375.2      | 674.2       | 561.9       | 362.5       | 205.8       | 242.6   | 277.1   | 99.8    | 406.8    | 382.9    | 121.4    | 89.8     | 375.2         | 242.6      | 0.6         |
| 223280_x_at | MS4A6A      | 8.10E-04 | 3247.2     | 4129.5     | 3561.8     | 4884.7      | 4537.6      | 3119.0      | 1453.0      | 2161.8  | 2662.4  | 1640.5  | 3381.0   | 3286.1   | 1675.5   | 1080.8   | 3561.8        | 2161.8     | 0.6         |
| 223922_x_at | MS4A6A      | 3.50E-04 | 1049.1     | 1348.6     | 1204.9     | 1629.1      | 1626.9      | 1092.8      | 570.8       | 624.4   | 887.4   | 641.9   | 1198.8   | 1100.5   | 494.1    | 345.1    | 1204.9        | 641.9      | 0.5         |
| 219666_at   | MS4A6A      | 5.40E-04 | 754.4      | 1338.0     | 978.2      | 1325.0      | 1309.1      | 874.1       | 345.6       | 463.4   | 710.2   | 286.8   | 760.5    | 900.1    | 311.8    | 141.1    | 978.2         | 463.4      | 0.5         |
| 209421_at   | MSH2        | 6.51E-03 | 164.3      | 334.5      | 317.6      | 263.4       | 229.1       | 244.6       | 199.8       | 201.7   | 202.3   | 153.2   | 150.7    | 150.4    | 133.8    | 88.9     | 244.6         | 150.7      | 0.6         |
| 225238_at   | MSI2        | 8.95E-03 | 67.1       | 99.8       | 78.5       | 75.1        | 111.3       | 109.2       | 79.0        | 65.3    | 53.8    | 50.4    | 73.6     | 53.5     | 72.7     | 49.0     | 79.0          | 53.8       | 0.7         |
| 225240_s_at | MSI2        | 6.70E-03 | 299.1      | 541.7      | 577.3      | 630.5       | 551.2       | 729.1       | 545.2       | 338.8   | 393.0   | 217.6   | 385.2    | 340.3    | 307.0    | 274.5    | 551.2         | 338.8      | 0.6         |
| 216685_s_at | MTAP        | 4.34E-03 | 130.7      | 106.9      | 116.2      | 131.3       | 124.9       | 137.3       | 106.1       | 115.2   | 85.7    | 69.7    | 97.4     | 98.0     | 109.8    | 68.7     | 124.9         | 97.4       | 0.8         |
| 203346_s_at | MTF2        | 6.97E-03 | 189.1      | 198.1      | 205.8      | 222.3       | 176.1       | 167.8       | 201.8       | 160.6   | 146.8   | 139.0   | 197.0    | 138.8    | 127.1    | 105.2    | 198.1         | 139.0      | 0.7         |
| 235689_at   | MTFMT       | 6.98E-03 | 224.7      | 262.2      | 250.4      | 235.0       | 274.9       | 287.6       | 224.5       | 248.5   | 172.6   | 156.7   | 187.4    | 164.9    | 174.9    | 117.9    | 250.4         | 172.6      | 0.7         |
| 202309_at   | MTHFD1      | 8.51E-03 | 646.5      | 824.6      | 1055.6     | 867.5       | 841.3       | 1037.4      | 798.0       | 735.3   | 612.8   | 559.8   | 659.8    | 488.0    | 611.1    | 477.8    | 841.3         | 611.1      | 0.7         |
| 226969_at   | MTR         | 4.44E-03 | 257.5      | 239.8      | 327.1      | 285.5       | 329.0       | 345.8       | 254.0       | 236.4   | 160.7   | 116.2   | 220.8    | 179.9    | 183.5    | 164.2    | 285.5         | 179.9      | 0.6         |
| 219822_at   | MTRF1       | 5.79E-03 | 515.2      | 505.0      | 478.1      | 526.1       | 458.6       | 457.8       | 439.3       | 439.7   | 360.1   | 346.2   | 439.7    | 398.2    | 366.2    | 333.9    | 478.1         | 366.2      | 0.8         |
| 212095_s_at | MTUS1       | 1.78E-03 | 48.7       | 82.8       | 285.5      | 83.6        | 47.4        | 58.3        | 58.1        | 40.8    | 58.1    | 185.4   | 58.2     | 37.6     | 46.0     | 38.6     | 58.3          | 46.0       | 0.8         |
| 212096_s_at | MTUS1       | 4.41E-03 | 44.9       | 139.8      | 362.8      | 66.7        | 52.7        | 89.8        | 48.9        | 47.6    | 56.5    | 186.6   | 45.9     | 34.3     | 45.3     | 17.0     | 66.7          | 45.9       | 0.7         |
| 223348_x_at | MUM1        | 3.62E-03 | 251.9      | 196.2      | 231.6      | 204.1       | 193.6       | 193.2       | 182.3       | 207.2   | 153.7   | 111.5   | 144.8    | 133.6    | 152.8    | 127.1    | 196.2         | 144.8      | 0.7         |
| 241749_at   | MURC        | 2.04E-03 | 93.7       | 126.4      | 161.0      | 159.5       | 138.7       | 187.8       | 162.7       | 95.1    | 71.6    | 51.7    | 69.4     | 45.7     | 60.9     | 32.2     | 159.5         | 60.9       | 0.4         |
| 202364_at   | MXI1        | 1.74E-03 | 181.7      | 224.4      | 507.6      | 325.6       | 386.8       | 358.3       | 251.2       | 183.1   | 133.0   | 161.1   | 163.6    | 175.7    | 120.2    | 108.3    | 325.6         | 161.1      | 0.5         |
| 204798_at   | MYB         | 4.34E-03 | 579.5      | 1341.5     | 1125.1     | 1396.7      | 1331.7      | 2044.0      | 881.9       | 545.6   | 860.4   | 169.1   | 793.6    | 471.5    | 559.2    | 181.2    | 1331.7        | 545.6      | 0.4         |
| 227761_at   | MYO5A       | 4.54E-03 | 306.0      | 333.7      | 568.8      | 566.6       | 601.6       | 682.5       | 724.3       | 288.9   | 217.6   | 322.0   | 489.2    | 289.6    | 297.0    | 289.2    | 568.8         | 289.6      | 0.5         |
| 203215_s_at | MYO6        | 4.54E-03 | 1000.2     | 1053.6     | 1010.5     | 1183.3      | 1094.8      | 1066.8      | 982.8       | 950.3   | 786.6   | 712.6   | 847.6    | 734.9    | 885.2    | 706.7    | 1053.6        | 786.6      | 0.7         |
| 205610_at   | MYOM1       | 4.50E-03 | 140.8      | 146.2      | 136.2      | 97.4        | 126.4       | 138.2       | 130.2       | 117.9   | 94.8    | 93.6    | 75.7     | 82.3     | 106.8    | 118.8    | 136.2         | 94.8       | 0.7         |
| 221820_s_at | MYST1       | 5.07E-03 | 952.3      | 1095.0     | 901.3      | 1263.4      | 1008.8      | 1207.7      | 961.8       | 951.9   | 589.6   | 311.1   | 687.1    | 741.5    | 840.0    | 400.9    | 1008.8        | 687.1      | 0.7         |
| 40569_at    | MZF1        | 6.10E-03 | 276.9      | 317.5      | 295.1      | 300.8       | 324.1       | 280.6       | 248.4       | 225.1   | 205.1   | 181.0   | 218.1    | 253.2    | 253.4    | 210.8    | 295.1         | 218.1      | 0.7         |
| 202944_at   | NAGA        | 2.89E-03 | 616.3      | 553.7      | 603.6      | 669.6       | 596.8       | 532.1       | 580.6       | 576.1   | 426.6   | 356.2   | 501.4    | 414.6    | 360.6    | 360.9    | 596.8         | 414.6      | 0.7         |
| 204860_s_at | NAIP        | 1.60E-03 | 719.1      | 824.3      | 721.5      | 689.6       | 737.3       | 481.6       | 473.2       | 637.1   | 403.9   | 264.7   | 435.3    | 519.4    | 249.0    | 232.6    | 719.1         | 403.9      | 0.6         |
| 228608_at   | NALCN       | 4.39E-03 | 155.7      | 131.1      | 413.3      | 258.7       | 230.4       | 555.5       | 177.4       | 169.1   | 96.7    | 155.3   | 134.4    | 77.5     | 186.3    | 91.5     | 230.4         | 134.4      | 0.6         |
| 208754_s_at | NAP1L1      | 7.96E-03 | 678.6      | 738.1      | 1069.1     | 1014.5      | 1199.7      | 1358.9      | 1513.9      | 659.8   | 635.3   | 747.0   | 806.0    | 782.1    | 744.3    | 821.1    | 1069.1        | 747.0      | 0.7         |
| 200027_at   | NARS        | 3.79E-03 | 1521.9     | 1815.7     | 2017.4     | 2118.0      | 2099.4      | 2385.2      | 1981.5      | 1491.4  | 1241.7  | 1143.8  | 1720.0   | 1181.1   | 1124.0   | 1067.6   | 2017.4        | 1181.1     | 0.6         |
| 219217_at   | NARS2       | 2.39E-03 | 310.3      | 351.3      | 399.6      | 366.5       | 303.8       | 370.6       | 343.0       | 301.2   | 203.4   | 235.5   | 257.9    | 222.0    | 219.0    | 179.6    | 351.3         | 222.0      | 0.6         |
| 222369_at   | NAT11       | 6.30E-03 | 215.0      | 420.1      | 373.3      | 326.6       | 315.0       | 391.9       | 307.1       | 222.1   | 275.8   | 124.6   | 276.3    | 139.3    | 157.3    | 117.1    | 326.6         | 157.3      | 0.5         |
| 223040_at   | NAT5        | 6.95E-03 | 1567.7     | 1488.2     | 1561.3     | 1615.9      | 1439.5      | 1586.9      | 1350.4      | 1482.9  | 1191.1  | 1024.2  | 1301.7   | 1085.4   | 1142.6   | 1085.5   | 1561.3        | 1142.6     | 0.7         |
| 212854_x_at | NBPFI0      | 5.93E-03 | 2553.2     | 2671.8     | 4207.4     | 2979.5      | 3100.2      | 4165.4      | 2982.1      | 2553.5  | 1893.2  | 1930.8  | 2511.2   | 1936.5   | 2385.4   | 1633.3   | 2982.1        | 1936.5     | 0.6         |
| 207677_s_at | NCF4        | 5.73E-03 | 2261.2     | 2118.6     | 1715.6     | 2072.0      | 1733.6      | 1980.8      | 1566.1      | 1811.5  | 1377.7  | 914.8   | 1433.4   | 1462.9   | 1787.1   | 1139.5   | 1980.8        | 1433.4     | 0.7         |
| 205147_x_at | NCF4        | 9.74E-03 | 1210.9     | 1190.8     | 963.1      | 1186.7      | 928.4       | 1082.7      | 898.6       | 1078.1  | 769.1   | 521.7   | 805.3    | 771.8    | 1033.5   | 626.0    | 1082.7        | 771.8      | 0.7         |
| 215857_at   | NCLN        | 8.13E-04 | 196.9      | 236.2      | 243.6      | 324.3       | 176.3       | 199.2       | 187.8       | 168.4   | 121.6   | 81.5    | 169.6    | 104.4    | 108.6    | 91.7     | 199.2         | 108.6      | 0.5         |
| 243807_at   | NCOA7       | 3.55E-03 | 66.9       | 57.5       | 50.6       | 59.0        | 62.2        | 55.9        | 50.2        | 50.7    | 30.4    | 32.6    | 44.0     | 43.7     | 39.0     | 46.9     | 57.5          | 43.7       | 0.8         |
| 200854_at   | NCOR1       | 7.46E-03 | 321.1      | 402.6      | 460.3      | 553.4       | 560.5       | 635.0       | 569.4       | 331.2   | 309.2   | 307.4   | 454.7    | 314.6    | 344.4    | 357.8    | 553.4         | 331.2      | 0.6         |
| 228993_s_at | NCRNA00081  | 1.09E-03 | 3314.6     | 4145.5     | 3875.1     | 3926.3      | 4002.7      | 5510.9      | 3384.4      | 2686.5  | 2833.5  | 1573.6  | 2618.1   | 2554.3   | 2994.6   | 1660.2   | 3926.3        | 2618.1     | 0.7         |
| 213788_s_at | NCRNA00094  | 9.38E-03 | 523.8      | 669.5      | 791.8      | 776.1       | 684.3       | 787.9       | 608.5       | 567.1   | 429.9   | 364.9   | 617.6    | 501.9    | 478.8    | 386.1    | 684.3         | 478.8      | 0.7         |
| 200632_s_at | NDRG1       | 4.19E-03 | 1464.6     | 1049.1     | 3030.6     | 1744.2      | 2588.9      | 3146.6      | 1837.0      | 1229.5  | 920.0   | 1156.6  | 900.2    | 1220.3   | 1082.7   | 1273.8   | 1837.0        | 1156.6     | 0.6         |
| 217286_s_at | NDRG3       | 1.94E-03 | 612.5      | 854.0      | 702.2      | 771.0       | 835.8       | 916.3       | 721.4       | 568.5   | 640.8   | 428.0   | 562.3    | 545.1    | 587.3    | 455.2    | 771.0         | 562.3      | 0.7         |
| 201740_at   | NDUFS3      | 3.77E-03 | 780.1      | 747.0      | 721.3      | 783.2       | 667.8       | 730.9       | 658.4       | 668.7   | 500.0   | 479.9   | 545.8    | 584.8    | 589.8    | 473.2    | 730.9         | 545.8      | 0.7         |
| 219396_s_at | NEIL1       | 7.94E-03 | 45.8       | 83.7       | 74.4       | 73.8        | 63.9        | 89.9        | 54.1        | 50.5    | 46.7    | 30.9    | 57.5     | 43.3     | 53.4     | 32.2     | 73.8          | 46.7       | 0.6         |
| 226585_at   | NEIL2       | 1.75E-03 | 2796.3     | 3436.4     | 2301.2     | 2301.9      | 2299.5      | 1997.3      | 2265.2      | 2344.0  | 2240.6  | 931.0   | 1623.0   | 1416.7   | 1181.9   | 935.0    | 2301.2        | 1416.7     | 0.6         |
| 223159_s_at | NEK6        | 8.24E-03 | 2402.6     | 1962.7     | 2323.7     | 2541.9      | 2161.7      | 2168.5      | 2557.0      | 2156.9  | 1669.3  | 1180.2  | 1891.2   | 1654.7   | 1728.8   | 1608.4   | 2323.7        | 1669.3     | 0.7         |
| 212299_at   | NEK9        | 5.92E-03 | 2191.7     | 2259.2     | 2724.5     | 2370.6      | 2328.4      | 2921.3      | 2489.7      | 1902.4  | 1968.2  | 1751.2  | 2087.7   | 1656.8   | 2015.6   | 1703.6   | 2370.6        | 1902.4     | 0.8         |
| 201830_s_at | NET1        | 9.71E-03 | 374.3      | 734.0      | 408.3      | 624.7       | 684.9       | 537.8       | 784.3       | 307.0   | 488.3   | 248.9   | 675.4    | 467.5    | 291.3    | 329.0    | 624.7         | 329.0      | 0.5         |
| 201829_at   | NET1        | 2.32E-03 | 698.6      | 1129.8     | 770.2      | 1210.3      | 1266.9      | 1159.2      | 1251.5      | 464.4   | 852.3   | 456.9   | 1040.9   | 839.9    | 535.7    | 531.6    | 1129.8        | 535.7      | 0.5         |
| 210555_s_at | NFATC3      | 7.81E-03 | 349.0      | 353.2      | 470.4      | 540.0       | 470.4       | 483.3       | 398.3       | 387.6   | 262.3   | 274.5   | 365.8    | 343.8    | 300.2    | 258.1    | 470.4         | 300.2      | 0.6         |
| 209930_s_at | NFE2        | 1.07E-03 | 118.4      | 82.6       | 181.8      | 325.7       | 182.4       | 190.7       | 160.3       | 95.6    | 65.5    | 85.8    | 145.2    | 81.8     | 113.1    | 69.1     | 181.8         | 85.8       | 0.5         |
| 224975_at   | NFIA        | 1.39E-04 | 362.8      | 527.7      | 485.2      | 513.9       | 590.3       | 681.9       | 372.0       | 220.5   | 269.5   | 155.5   | 309.5    | 292.8    | 262.8    | 138.6    | 513.9         | 262.8      | 0.5         |
| 224970_at   | NFIA        | 4.11E-04 | 646.4      | 927.8      | 853.4      | 824.1       | 943.7       | 1087.9      | 605.2       | 392.5   | 496.1   | 244.7   | 443.6    | 580.0    | 419.9    | 181.1    | 853.4         | 419.9      | 0.5         |
| 229994_at   | NFIA        | 6.14E-03 | 80.9       | 151.5      | 251.6      | 184.0       | 263.2       | 289.0       | 159.5       | 75.0    | 106.4   | 49.2    | 127.2    | 112.2    | 79.5     | 33.4     | 184.0         | 79.5       | 0.4         |
| 226806_s_at | NFIA        | 1.75E-03 | 227.4      | 508.6      | 576.1      | 496.8       | 671.8       | 711.2       | 380.2       | 193.1   | 262.5   | 99.2    |          |          |          |          |               |            |             |

Supplementary Table S2. Continued.

| ID           | Gene Symbol          | p-value  | VW3_Saline | VW6_Saline | VW7_Saline | VW13_Saline | VW22_Saline | VW23_Saline | VW25_Saline | VW3_LPS | VW6_LPS | VW7_LPS | VW13_LPS | VW22_LPS | VW23_LPS | VW25_LPS | Median_saline | Median_LPS | Fold change |
|--------------|----------------------|----------|------------|------------|------------|-------------|-------------|-------------|-------------|---------|---------|---------|----------|----------|----------|----------|---------------|------------|-------------|
| 201709_s_at  | NIPSNAP1             | 2.98E-03 | 176.6      | 161.8      | 203.0      | 199.2       | 175.3       | 200.5       | 155.6       | 156.2   | 122.5   | 87.7    | 135.4    | 111.2    | 140.1    | 91.6     | 176.6         | 122.5      | 0.7         |
| 201708_s_at  | NIPSNAP1             | 4.16E-03 | 147.1      | 134.3      | 180.9      | 163.7       | 154.5       | 184.9       | 144.5       | 133.9   | 90.3    | 64.3    | 127.1    | 93.0     | 105.8    | 62.6     | 154.5         | 93.0       | 0.6         |
| 221104_s_at  | NIPSNAP3B            | 9.60E-03 | 69.4       | 102.3      | 147.5      | 87.1        | 102.8       | 154.1       | 116.8       | 55.0    | 63.5    | 94.3    | 94.3     | 55.7     | 50.6     | 63.2     | 102.8         | 63.2       | 0.6         |
| 225930_at    | NKIRAS1              | 5.96E-03 | 388.7      | 486.1      | 455.6      | 490.0       | 508.1       | 491.6       | 476.9       | 365.5   | 376.5   | 365.1   | 372.1    | 363.3    | 338.9    | 387.1    | 486.1         | 365.5      | 0.8         |
| 222589_at    | NLK                  | 8.01E-03 | 876.0      | 964.6      | 896.8      | 968.8       | 947.8       | 1134.2      | 767.3       | 771.8   | 814.5   | 665.4   | 873.1    | 631.3    | 709.5    | 586.4    | 947.8         | 709.5      | 0.7         |
| 1552553_a_at | NLRCC4               | 2.46E-03 | 1303.2     | 1591.1     | 1526.5     | 1513.2      | 1410.6      | 1794.1      | 1576.9      | 1013.7  | 1092.1  | 517.8   | 1145.8   | 880.6    | 1020.4   | 808.3    | 1526.5        | 1013.7     | 0.7         |
| 211822_s_at  | NLRP1                | 3.10E-03 | 254.3      | 198.7      | 308.9      | 381.4       | 248.7       | 256.9       | 274.4       | 179.8   | 170.0   | 155.6   | 210.9    | 182.3    | 216.3    | 162.9    | 256.9         | 179.8      | 0.7         |
| 211824_x_at  | NLRP1                | 2.01E-04 | 211.3      | 144.7      | 235.7      | 261.3       | 186.1       | 214.2       | 194.7       | 127.1   | 99.4    | 133.9   | 149.9    | 135.4    | 146.6    | 109.0    | 211.3         | 133.9      | 0.6         |
| 210113_s_at  | NLRP1                | 1.78E-04 | 375.4      | 280.2      | 376.4      | 382.0       | 337.8       | 359.2       | 333.0       | 273.8   | 153.1   | 198.0   | 235.5    | 215.5    | 242.8    | 195.7    | 359.2         | 215.5      | 0.6         |
| 218036_x_at  | NMD3                 | 6.66E-03 | 596.3      | 572.5      | 633.0      | 660.9       | 635.0       | 620.9       | 738.0       | 532.0   | 430.2   | 537.0   | 562.1    | 388.9    | 457.2    | 454.1    | 633.0         | 457.2      | 0.7         |
| 221210_s_at  | NPL                  | 9.27E-03 | 568.0      | 586.3      | 600.4      | 698.5       | 737.5       | 714.6       | 599.7       | 493.2   | 414.2   | 388.8   | 542.2    | 745.7    | 417.2    | 327.6    | 600.4         | 417.2      | 0.7         |
| 205259_at    | NR3C2                | 2.93E-04 | 70.0       | 69.5       | 75.6       | 63.2        | 92.6        | 91.3        | 63.1        | 42.7    | 42.8    | 42.7    | 42.8     | 46.1     | 34.6     | 39.1     | 70.0          | 42.7       | 0.6         |
| 212298_at    | NRP1                 | 7.81E-03 | 598.2      | 512.0      | 599.3      | 650.7       | 635.2       | 448.0       | 964.3       | 542.7   | 327.5   | 256.0   | 622.2    | 379.2    | 293.5    | 387.5    | 599.3         | 379.2      | 0.6         |
| 226880_at    | NUCKS1               | 9.29E-03 | 1734.5     | 2014.2     | 2500.9     | 2278.2      | 2307.8      | 2764.6      | 2774.6      | 1676.7  | 1715.9  | 1726.1  | 1959.5   | 1504.8   | 1574.2   | 1517.0   | 2307.8        | 1676.7     | 0.7         |
| 224582_s_at  | NUCKS1               | 7.68E-03 | 1013.5     | 1034.9     | 1153.0     | 1027.4      | 1026.5      | 1113.0      | 1070.6      | 1014.6  | 783.2   | 555.6   | 832.7    | 704.7    | 748.1    | 662.0    | 1034.9        | 748.1      | 0.7         |
| 217802_s_at  | NUCKS1               | 5.72E-03 | 3534.1     | 4018.1     | 4355.5     | 3929.0      | 4046.4      | 5001.9      | 4264.7      | 3063.0  | 3208.2  | 2873.8  | 3637.0   | 2833.4   | 2887.4   | 2858.4   | 4046.4        | 2887.4     | 0.7         |
| 223661_at    | NUCKS1               | 1.94E-03 | 1118.2     | 1162.9     | 1198.0     | 1157.6      | 1080.2      | 1246.8      | 1219.8      | 922.0   | 870.1   | 577.2   | 874.8    | 774.0    | 751.8    | 726.5    | 1162.9        | 774.0      | 0.7         |
| 224581_s_at  | NUCKS1               | 2.27E-03 | 851.1      | 941.0      | 1129.0     | 1014.1      | 1037.0      | 1280.1      | 1180.5      | 695.9   | 688.9   | 679.7   | 857.6    | 597.2    | 596.1    | 649.6    | 1037.0        | 679.7      | 0.7         |
| 201270_x_at  | NUDCC3               | 3.19E-03 | 786.1      | 715.7      | 702.5      | 697.8       | 700.8       | 792.1       | 634.9       | 673.2   | 549.7   | 448.2   | 554.9    | 568.8    | 594.6    | 430.1    | 702.5         | 554.9      | 0.8         |
| 224830_at    | NUDT21               | 8.83E-03 | 292.7      | 382.1      | 537.3      | 531.5       | 461.6       | 553.9       | 557.0       | 316.9   | 248.9   | 391.5   | 436.6    | 254.3    | 322.6    | 371.0    | 531.5         | 322.6      | 0.6         |
| 206303_s_at  | NUDT4                | 2.46E-03 | 206.9      | 167.1      | 200.7      | 211.6       | 198.3       | 203.9       | 162.0       | 169.2   | 120.1   | 121.5   | 191.8    | 125.7    | 139.5    | 107.4    | 200.7         | 125.7      | 0.6         |
| 206302_s_at  | NUDT4 ///<br>NUDT4P1 | 8.02E-03 | 450.0      | 521.1      | 701.8      | 634.9       | 555.6       | 698.2       | 528.8       | 447.4   | 394.8   | 318.9   | 518.9    | 394.4    | 369.3    | 322.7    | 555.6         | 394.4      | 0.7         |
| 212181_s_at  | NUDT4 ///<br>NUDT4P1 | 1.66E-03 | 1333.1     | 1238.3     | 1677.0     | 1621.9      | 1458.9      | 1537.8      | 1356.6      | 1127.5  | 964.4   | 818.1   | 1182.1   | 833.0    | 793.6    | 796.2    | 1458.9        | 833.0      | 0.6         |
| 230329_s_at  | NUDT6                | 1.32E-03 | 196.3      | 249.4      | 276.4      | 276.0       | 219.9       | 259.5       | 197.8       | 186.5   | 154.6   | 102.0   | 142.4    | 122.0    | 131.7    | 86.3     | 249.4         | 131.7      | 0.5         |
| 200747_s_at  | NUMA1                | 9.10E-03 | 394.0      | 369.6      | 456.9      | 492.0       | 399.8       | 446.5       | 431.8       | 322.5   | 222.9   | 237.5   | 381.6    | 387.7    | 367.4    | 269.0    | 431.8         | 322.5      | 0.7         |
| 214251_s_at  | NUMA1                | 6.78E-03 | 210.2      | 198.0      | 235.2      | 285.0       | 200.9       | 225.5       | 192.1       | 157.0   | 125.8   | 144.2   | 199.1    | 179.3    | 215.4    | 139.5    | 210.2         | 157.0      | 0.7         |
| 202155_s_at  | NUP214               | 9.86E-03 | 2078.1     | 2098.9     | 2123.1     | 2152.7      | 2373.5      | 2572.8      | 2149.2      | 2003.6  | 1601.4  | 1043.5  | 1638.2   | 1963.1   | 1866.7   | 1442.0   | 2149.2        | 1638.2     | 0.8         |
| 219978_s_at  | NUSAP1               | 3.52E-03 | 241.7      | 234.9      | 271.2      | 266.6       | 251.0       | 191.0       | 200.2       | 231.8   | 126.7   | 168.5   | 209.7    | 123.2    | 129.9    | 133.5    | 241.7         | 133.5      | 0.6         |
| 205441_at    | OCEL1                | 1.09E-03 | 257.6      | 219.0      | 200.8      | 281.5       | 184.1       | 226.2       | 178.2       | 197.2   | 113.5   | 99.3    | 180.4    | 137.7    | 172.9    | 105.4    | 219.0         | 137.7      | 0.6         |
| 213273_at    | ODZ4                 | 6.71E-04 | 85.8       | 107.2      | 122.2      | 86.1        | 107.1       | 184.3       | 83.4        | 75.9    | 70.5    | 62.7    | 49.4     | 101.1    | 106.8    | 52.1     | 107.2         | 70.5       | 0.7         |
| 209240_at    | OGT                  | 3.85E-03 | 2103.3     | 2234.2     | 2431.8     | 2335.0      | 2086.4      | 2369.1      | 2008.2      | 1730.4  | 1684.4  | 1234.4  | 1943.1   | 1645.4   | 1409.6   | 1342.0   | 2234.2        | 1645.4     | 0.7         |
| 229787_s_at  | OGT                  | 5.33E-03 | 580.9      | 910.0      | 1148.2     | 1046.5      | 847.4       | 1036.3      | 883.1       | 594.4   | 653.8   | 596.7   | 822.4    | 541.5    | 524.4    | 549.0    | 910.0         | 594.4      | 0.7         |
| 221864_at    | ORA13                | 2.46E-03 | 960.7      | 1052.9     | 1200.4     | 1231.7      | 1022.0      | 1208.0      | 883.9       | 862.0   | 582.9   | 440.5   | 760.3    | 765.8    | 683.0    | 497.0    | 1052.9        | 683.0      | 0.6         |
| 229527_s_at  | OSBPL11              | 5.91E-04 | 689.4      | 648.8      | 591.7      | 683.6       | 597.9       | 745.0       | 604.5       | 526.6   | 331.5   | 230.5   | 421.7    | 395.8    | 458.1    | 324.7    | 648.8         | 395.8      | 0.6         |
| 222586_s_at  | OSBPL11              | 1.25E-03 | 1288.5     | 1579.0     | 1452.5     | 1781.2      | 1542.1      | 1999.2      | 1445.2      | 1186.7  | 1026.7  | 590.4   | 1010.5   | 866.2    | 902.6    | 593.3    | 1542.1        | 902.6      | 0.6         |
| 218304_s_at  | OSBPL11              | 1.19E-03 | 2184.5     | 3014.5     | 2951.2     | 3050.3      | 2807.1      | 3814.5      | 2670.1      | 1822.2  | 1971.4  | 1169.4  | 2089.4   | 1238.0   | 1529.2   | 1030.9   | 2951.2        | 1529.2     | 0.5         |
| 209485_s_at  | OSBPL1A              | 7.87E-03 | 3206.3     | 3736.8     | 3419.2     | 3096.6      | 2812.1      | 2740.5      | 2722.5      | 2674.1  | 3301.9  | 2248.3  | 2235.7   | 2381.1   | 2206.9   | 2208.4   | 3096.6        | 2248.3     | 0.7         |
| 209627_s_at  | OSBPL3               | 1.44E-03 | 58.7       | 57.9       | 60.8       | 94.0        | 62.5        | 123.3       | 64.2        | 50.7    | 34.6    | 27.3    | 48.2     | 34.7     | 36.1     | 20.0     | 62.5          | 34.7       | 0.6         |
| 230032_at    | OSGEPL1              | 9.34E-03 | 80.7       | 104.6      | 152.2      | 144.3       | 117.5       | 140.8       | 121.9       | 85.4    | 56.9    | 49.1    | 112.0    | 88.5     | 50.2     | 38.5     | 121.9         | 56.9       | 0.5         |
| 1559201_a_at | OSTF1                | 9.36E-03 | 96.0       | 95.6       | 102.0      | 107.0       | 91.1        | 112.6       | 105.3       | 94.1    | 75.0    | 75.7    | 88.2     | 74.1     | 76.4     | 78.2     | 102.0         | 76.4       | 0.7         |
| 208717_at    | OXA1L                | 4.37E-03 | 1115.4     | 1257.6     | 1441.4     | 1325.5      | 1281.3      | 1403.2      | 1303.5      | 1089.8  | 857.6   | 753.2   | 895.4    | 1002.3   | 1007.9   | 811.3    | 1303.5        | 857.6      | 0.7         |
| 218957_at    | PAAF1                | 7.85E-03 | 211.8      | 181.5      | 309.9      | 225.6       | 300.3       | 307.7       | 250.2       | 218.4   | 108.1   | 123.6   | 192.3    | 209.4    | 171.9    | 127.1    | 250.2         | 171.9      | 0.7         |
| 1555824_a_at | PACS2                | 4.22E-03 | 238.7      | 205.1      | 218.1      | 259.3       | 222.8       | 217.0       | 172.6       | 176.2   | 164.6   | 133.6   | 154.3    | 119.9    | 150.5    | 166.4    | 218.1         | 154.3      | 0.7         |
| 205233_s_at  | PAFAH2               | 4.37E-03 | 191.2      | 165.3      | 187.4      | 208.3       | 213.5       | 206.7       | 169.3       | 191.2   | 107.1   | 97.1    | 165.4    | 133.7    | 140.3    | 110.6    | 191.2         | 133.7      | 0.7         |
| 205232_s_at  | PAFAH2               | 9.71E-03 | 80.0       | 64.6       | 84.4       | 95.9        | 96.0        | 94.6        | 92.0        | 74.4    | 66.7    | 50.2    | 69.7     | 56.3     | 59.5     | 57.2     | 92.0          | 59.5       | 0.6         |
| 230100_x_at  | PAK1                 | 6.00E-03 | 52.6       | 62.0       | 80.3       | 78.8        | 89.0        | 78.4        | 72.4        | 52.5    | 42.6    | 26.2    | 63.4     | 37.9     | 35.6     | 38.5     | 78.4          | 38.5       | 0.5         |
| 212858_at    | PAQR4                | 9.35E-03 | 179.0      | 133.5      | 138.2      | 139.3       | 161.2       | 135.1       | 126.1       | 165.3   | 80.9    | 69.2    | 111.2    | 115.4    | 116.3    | 96.2     | 138.2         | 111.2      | 0.8         |
| 220333_at    | PAQR5                | 8.11E-03 | 86.6       | 92.6       | 126.5      | 92.2        | 129.7       | 64.6        | 79.9        | 90.6    | 74.4    | 85.9    | 72.4     | 67.8     | 36.0     | 45.4     | 92.2          | 72.4       | 0.8         |
| 242871_at    | PAQR5                | 4.34E-03 | 160.3      | 194.8      | 248.7      | 150.7       | 214.8       | 108.6       | 172.8       | 158.8   | 135.9   | 117.7   | 115.4    | 95.6     | 40.5     | 67.8     | 172.8         | 115.4      | 0.7         |
| 213534_s_at  | PASK                 | 3.19E-03 | 165.4      | 170.2      | 220.3      | 197.5       | 178.1       | 151.0       | 138.7       | 133.9   | 121.9   | 107.4   | 148.7    | 100.3    | 116.5    | 106.9    | 170.2         | 116.5      | 0.7         |
| 216945_x_at  | PASK                 | 8.86E-04 | 173.1      | 183.4      | 166.4      | 198.2       | 152.3       | 137.2       | 105.3       | 118.3   | 141.6   | 94.9    | 147.9    | 99.6     | 99.5     | 78.5     | 166.4         | 99.6       | 0.6         |
| 214177_s_at  | PBXIP1               | 1.37E-03 | 1369.7     | 1595.8     | 1661.9     | 1814.0      | 1585.2      | 1776.7      | 1290.1      | 1102.7  | 1259.5  | 986.1   | 1340.6   | 1138.4   | 1164.6   | 939.7    | 1595.8        | 1138.4     | 0.7         |
| 223712_at    | PCBD2                | 6.40E-03 | 87.8       | 103.1      | 94.7       | 101.6       | 91.9        | 114.8       | 110.0       | 74.1    | 95.8    | 60.4    | 83.0     | 67.9     | 86.6     | 73.8     | 101.6         | 74.1       | 0.7         |
| 203860_at    | PCCA                 | 2.98E-04 | 893.6      | 931.0      | 746.6      | 897.6       | 713.1       | 827.1       | 553.1       | 593.1   | 622.2   | 328.3   | 532.3    | 490.8    | 520.4    | 316.1    | 827.1         | 520.4      | 0.6         |
| 212694_s_at  | PCCB                 | 6.45E-03 | 516.5      | 579.8      | 590.9      | 558.1       | 530.3       | 535.2       | 492.1       | 489.8   | 328.8   | 424.0   | 442.0    | 426.8    | 392.8    | 357.6    | 535.2         | 424.0      | 0.8         |
| 209996_x_at  | PCM1                 | 7.27E-03 | 448.3      | 384.1      | 452.2      | 442.4       | 395.8       | 459.2       | 438.9       | 354.2   | 297.3   | 311.8   | 330.0    | 388.5    | 353.4    | 337.0    | 442.4         | 337.0      | 0.8         |
| 209997_x_at  | PCM1                 | 1.64E-03 | 610.5      | 573.9      | 632.7      | 619.8       | 582.3       | 698.3       | 624.0       | 510.0   | 395.6   | 404.2   | 440.0    | 487.5    | 495.3    | 413.6    | 619.8         | 440.0      | 0.7         |
| 214118_x_at  | PCM1                 | 1.53E-03 | 246.8      | 235.4      | 307.6      | 272.1       | 251.3       | 357.8       | 320.4       | 195.3   | 183.2   | 195.3   | 217.8    | 158.7    | 187.6    | 187.9    | 272.1         | 187.9      | 0.7         |
| 214937_x_at  |                      |          |            |            |            |             |             |             |             |         |         |         |          |          |          |          |               |            |             |

TRANSCRIPTION PROFILES IN ALVEOLAR MACROPHAGES

Supplementary Table S2. Continued.

| ID           | Gene Symbol | p-value  | VW3_Saline | VW6_Saline | VW7_Saline | VW13_Saline | VW22_Saline | VW23_Saline | VW25_Saline | VW3_LPS | VW6_LPS | VW7_LPS | VW13_LPS | VW22_LPS | VW23_LPS | VW25_LPS | Median_saline | Median_LPS | Fold change |
|--------------|-------------|----------|------------|------------|------------|-------------|-------------|-------------|-------------|---------|---------|---------|----------|----------|----------|----------|---------------|------------|-------------|
| 225274_at    | PCYOX1      | 4.10E-03 | 220.0      | 301.1      | 331.8      | 301.8       | 341.1       | 324.4       | 310.2       | 239.4   | 212.4   | 147.8   | 186.0    | 197.6    | 170.3    | 137.4    | 310.2         | 186.0      | 0.6         |
| 218953_s_at  | PCYOX1L     | 1.47E-03 | 455.8      | 828.9      | 572.9      | 733.4       | 456.6       | 835.4       | 540.9       | 367.7   | 423.7   | 157.5   | 474.0    | 271.2    | 292.8    | 198.5    | 572.9         | 292.8      | 0.5         |
| 212593_s_at  | PDCD4       | 2.46E-03 | 3031.7     | 3767.6     | 4215.2     | 3960.7      | 3736.3      | 5217.7      | 3531.7      | 2562.7  | 2944.2  | 1727.6  | 2772.3   | 2367.1   | 2871.4   | 1696.4   | 3767.6        | 2562.7     | 0.7         |
| 202730_s_at  | PDCD4       | 1.63E-03 | 468.2      | 601.0      | 728.4      | 638.2       | 589.3       | 884.2       | 498.4       | 425.0   | 408.5   | 310.1   | 406.9    | 370.6    | 435.4    | 230.3    | 601.0         | 406.9      | 0.7         |
| 202731_at    | PDCD4       | 2.38E-03 | 307.0      | 436.0      | 537.4      | 423.0       | 416.5       | 673.4       | 363.8       | 284.0   | 271.6   | 191.2   | 299.5    | 229.2    | 272.8    | 149.9    | 423.0         | 271.6      | 0.6         |
| 238153_at    | PDE6B       | 4.22E-04 | 197.8      | 155.6      | 193.4      | 170.0       | 150.6       | 171.5       | 131.2       | 145.9   | 93.4    | 131.4   | 125.5    | 107.5    | 108.2    | 91.9     | 170.0         | 108.2      | 0.6         |
| 204091_at    | PDE6D       | 4.15E-03 | 719.1      | 890.4      | 944.3      | 936.6       | 726.1       | 938.3       | 809.6       | 709.3   | 508.1   | 647.4   | 771.9    | 477.8    | 552.3    | 524.7    | 890.4         | 552.3      | 0.6         |
| 222860_s_at  | PDGFD       | 6.84E-03 | 257.1      | 400.7      | 635.6      | 487.5       | 547.5       | 422.6       | 151.6       | 286.0   | 277.0   | 374.5   | 358.6    | 350.7    | 288.4    | 91.3     | 422.6         | 288.4      | 0.7         |
| 208911_s_at  | PDHB        | 9.87E-03 | 418.6      | 430.6      | 549.8      | 448.2       | 434.7       | 467.6       | 447.1       | 406.4   | 338.0   | 294.3   | 355.9    | 357.9    | 341.7    | 279.9    | 447.1         | 341.7      | 0.8         |
| 202590_s_at  | PDK2        | 8.38E-03 | 86.2       | 85.5       | 103.1      | 98.3        | 91.8        | 108.7       | 79.0        | 66.2    | 60.2    | 55.8    | 72.3     | 80.9     | 77.7     | 74.0     | 91.8          | 72.3       | 0.8         |
| 206348_s_at  | PDK3        | 5.26E-03 | 227.7      | 229.4      | 272.6      | 241.8       | 299.4       | 266.5       | 246.3       | 228.4   | 183.5   | 172.4   | 185.1    | 202.7    | 176.6    | 153.7    | 246.3         | 183.5      | 0.7         |
| 205960_at    | PDK4        | 8.85E-03 | 411.4      | 727.2      | 296.6      | 271.7       | 348.9       | 502.1       | 283.7       | 350.8   | 300.9   | 52.3    | 215.9    | 282.2    | 171.1    | 68.9     | 348.9         | 215.9      | 0.6         |
| 208690_s_at  | PDLIM1      | 8.89E-03 | 3268.0     | 3239.0     | 2094.9     | 2973.2      | 2567.7      | 2820.7      | 2084.9      | 2663.1  | 2343.9  | 1514.2  | 2497.7   | 1897.9   | 2540.3   | 1840.9   | 2820.7        | 2343.9     | 0.8         |
| 219165_at    | PDLIM2      | 6.61E-03 | 291.1      | 232.7      | 330.5      | 318.2       | 291.4       | 376.2       | 295.2       | 246.6   | 127.1   | 150.7   | 220.3    | 237.4    | 331.5    | 193.8    | 295.2         | 220.3      | 0.7         |
| 221244_s_at  | PDPK1       | 4.74E-03 | 710.6      | 764.3      | 754.1      | 842.0       | 781.4       | 787.8       | 703.8       | 660.9   | 589.5   | 544.4   | 592.8    | 607.8    | 630.4    | 534.2    | 764.3         | 592.8      | 0.8         |
| 223290_at    | PDXP        | 1.10E-03 | 95.5       | 91.5       | 108.7      | 112.6       | 114.7       | 88.3        | 94.5        | 60.8    | 56.7    | 58.3    | 75.9     | 72.2     | 80.8     | 61.4     | 95.5          | 61.4       | 0.6         |
| 205353_s_at  | PEBP1       | 3.83E-03 | 5548.6     | 6089.2     | 6168.5     | 5738.6      | 5854.8      | 6393.2      | 5789.6      | 4735.7  | 5003.8  | 4668.9  | 4842.6   | 3962.0   | 4751.4   | 4057.7   | 5854.8        | 4735.7     | 0.8         |
| 210825_s_at  | PEBP1       | 7.22E-03 | 4970.3     | 5475.3     | 5872.4     | 5507.2      | 5179.1      | 5815.2      | 5717.4      | 4606.1  | 4827.2  | 4300.9  | 4419.3   | 3724.5   | 4411.5   | 3856.9   | 5507.2        | 4411.5     | 0.8         |
| 1559921_at   | PECAM1      | 9.38E-03 | 361.7      | 371.8      | 336.8      | 378.2       | 353.2       | 368.6       | 335.9       | 313.3   | 284.3   | 226.0   | 278.3    | 328.6    | 318.1    | 244.6    | 361.7         | 284.3      | 0.8         |
| 208981_at    | PECAM1      | 9.75E-04 | 3240.9     | 3741.8     | 3553.1     | 4090.7      | 4355.2      | 4403.5      | 3337.4      | 2663.2  | 2720.5  | 2250.3  | 3094.4   | 2882.5   | 2499.1   | 2238.4   | 3741.8        | 2663.2     | 0.7         |
| 208983_s_at  | PECAM1      | 1.48E-03 | 8133.7     | 8764.6     | 7201.9     | 8474.2      | 8982.7      | 8670.2      | 7398.6      | 6922.7  | 5807.3  | 4135.8  | 5935.9   | 7060.2   | 6213.5   | 4681.7   | 8474.2        | 5935.9     | 0.7         |
| 221142_s_at  | PECR        | 8.91E-04 | 258.7      | 341.4      | 483.4      | 497.0       | 513.5       | 587.7       | 366.5       | 210.4   | 277.5   | 272.1   | 320.3    | 315.1    | 350.1    | 225.9    | 483.4         | 277.5      | 0.6         |
| 230068_s_at  | PEG3        | 7.46E-03 | 76.7       | 75.9       | 88.3       | 105.7       | 111.2       | 113.0       | 102.0       | 62.6    | 71.6    | 63.9    | 92.3     | 71.1     | 80.3     | 62.6     | 102.0         | 71.1       | 0.7         |
| 235431_s_at  | PEL1        | 7.00E-04 | 1648.1     | 1865.5     | 1585.6     | 2068.0      | 1749.3      | 2355.1      | 1401.7      | 1138.8  | 994.9   | 337.8   | 853.9    | 894.0    | 1189.7   | 523.1    | 1749.3        | 894.0      | 0.5         |
| 205251_at    | PER2        | 4.35E-03 | 732.4      | 909.2      | 905.9      | 816.2       | 698.0       | 1029.0      | 800.7       | 667.0   | 670.4   | 358.7   | 677.1    | 375.8    | 555.2    | 419.9    | 816.2         | 555.2      | 0.7         |
| 208518_s_at  | PER2        | 3.77E-03 | 129.7      | 94.3       | 126.6      | 125.3       | 101.8       | 122.5       | 101.3       | 89.8    | 73.0    | 59.1    | 113.5    | 73.5     | 81.2     | 52.1     | 122.5         | 73.5       | 0.6         |
| 1555131_a_at | PER3        | 8.40E-03 | 86.4       | 77.0       | 162.8      | 137.6       | 98.3        | 84.1        | 151.3       | 73.0    | 70.0    | 88.4    | 58.1     | 67.0     | 68.6     | 63.0     | 98.3          | 68.6       | 0.7         |
| 221045_s_at  | PER3        | 7.99E-03 | 115.5      | 164.1      | 211.2      | 189.0       | 129.9       | 140.1       | 208.9       | 107.8   | 132.1   | 100.1   | 144.3    | 75.0     | 112.3    | 97.8     | 164.1         | 107.8      | 0.7         |
| 205160_at    | PEX11A      | 4.13E-03 | 160.6      | 258.4      | 224.1      | 200.5       | 186.6       | 404.2       | 201.3       | 142.2   | 155.6   | 108.5   | 153.1    | 126.7    | 140.6    | 69.3     | 201.3         | 140.6      | 0.7         |
| 201707_at    | PEX19       | 6.99E-03 | 735.4      | 849.2      | 937.1      | 918.7       | 788.4       | 986.2       | 851.4       | 759.0   | 635.1   | 504.2   | 732.7    | 515.8    | 670.3    | 563.0    | 851.4         | 635.1      | 0.7         |
| 213302_at    | PFAS        | 1.93E-03 | 395.9      | 388.4      | 461.1      | 479.6       | 403.1       | 428.0       | 468.4       | 317.7   | 325.3   | 265.8   | 372.5    | 281.6    | 279.2    | 284.9    | 428.0         | 284.9      | 0.7         |
| 238450_at    | PFKFB2      | 2.06E-03 | 96.8       | 86.8       | 104.9      | 100.8       | 108.0       | 121.9       | 82.1        | 75.8    | 53.5    | 74.8    | 85.8     | 61.5     | 85.7     | 62.4     | 100.8         | 74.8       | 0.7         |
| 209992_at    | PFKFB2      | 4.22E-03 | 59.1       | 71.3       | 104.6      | 92.8        | 101.7       | 118.4       | 76.6        | 62.8    | 45.1    | 40.7    | 66.3     | 55.8     | 51.7     | 39.9     | 92.8          | 51.7       | 0.6         |
| 226733_at    | PFKFB2      | 9.01E-04 | 141.4      | 183.7      | 210.7      | 231.8       | 209.7       | 229.1       | 166.0       | 104.8   | 123.4   | 54.4    | 118.0    | 82.0     | 70.9     | 49.4     | 209.7         | 82.0       | 0.4         |
| 55616_at     | PGAP3       | 6.35E-03 | 506.3      | 434.0      | 380.4      | 519.8       | 485.0       | 468.2       | 412.6       | 422.3   | 278.8   | 236.9   | 349.4    | 384.2    | 461.4    | 286.2    | 468.2         | 349.4      | 0.7         |
| 238004_at    | PGBD2       | 8.35E-03 | 148.4      | 167.9      | 146.8      | 143.5       | 135.3       | 125.7       | 132.8       | 118.5   | 148.9   | 98.1    | 123.7    | 116.8    | 96.9     | 96.7     | 143.5         | 116.8      | 0.8         |
| 201118_at    | PGD         | 9.12E-03 | 1395.4     | 1246.0     | 1434.6     | 1497.5      | 1364.5      | 1403.6      | 1424.9      | 1250.2  | 884.9   | 717.3   | 1114.3   | 1126.4   | 1207.5   | 981.0    | 1403.6        | 1114.3     | 0.8         |
| 201968_s_at  | PGM1        | 2.68E-03 | 1704.6     | 2235.7     | 2065.9     | 1973.3      | 1875.4      | 1852.5      | 2062.9      | 1607.3  | 1692.4  | 1204.6  | 1483.0   | 1220.3   | 1176.9   | 1375.0   | 1973.3        | 1375.0     | 0.7         |
| 229553_at    | PGM2L1      | 1.97E-03 | 315.6      | 239.5      | 224.5      | 221.9       | 198.7       | 199.1       | 216.7       | 241.1   | 166.1   | 163.8   | 191.9    | 158.2    | 135.5    | 151.4    | 221.9         | 163.8      | 0.7         |
| 226303_at    | PGM5        | 2.47E-03 | 353.1      | 245.6      | 330.5      | 468.1       | 445.5       | 293.6       | 202.0       | 360.3   | 140.8   | 114.1   | 267.8    | 247.7    | 166.3    | 87.1     | 330.5         | 166.3      | 0.5         |
| 218410_s_at  | PGP         | 8.76E-03 | 124.1      | 131.2      | 119.4      | 119.3       | 113.3       | 118.5       | 138.2       | 101.0   | 73.7    | 73.3    | 92.1     | 102.5    | 107.8    | 92.5     | 119.4         | 92.5       | 0.8         |
| 237202_at    | PGPEP1      | 3.33E-03 | 162.8      | 156.2      | 155.2      | 147.4       | 146.7       | 155.3       | 161.2       | 126.9   | 109.2   | 98.7    | 126.7    | 108.3    | 133.8    | 110.3    | 155.3         | 110.3      | 0.7         |
| 201121_s_at  | PGRMC1      | 5.18E-03 | 1375.6     | 1391.7     | 1688.4     | 1761.5      | 1569.6      | 1712.1      | 1493.7      | 1286.2  | 1201.2  | 1090.7  | 1345.2   | 1103.6   | 1208.2   | 1075.7   | 1569.6        | 1201.2     | 0.8         |
| 213638_at    | PHACTR1     | 1.43E-03 | 2579.8     | 1946.7     | 2149.4     | 2581.3      | 2214.1      | 1987.7      | 3079.6      | 1770.5  | 1470.1  | 1723.2  | 1395.7   | 1332.2   | 1581.0   | 1816.4   | 2214.1        | 1581.0     | 0.7         |
| 200659_s_at  | PHB         | 9.02E-03 | 691.5      | 568.8      | 504.7      | 542.3       | 469.5       | 469.7       | 530.1       | 483.4   | 375.8   | 279.4   | 434.4    | 424.7    | 451.4    | 311.7    | 530.1         | 424.7      | 0.8         |
| 217952_x_at  | PHF3        | 2.93E-03 | 880.3      | 1013.3     | 1298.1     | 1053.4      | 1208.1      | 1376.9      | 900.8       | 796.6   | 778.1   | 847.8   | 805.9    | 777.8    | 779.8    | 667.7    | 1053.4        | 779.8      | 0.7         |
| 215718_s_at  | PHF3        | 9.33E-04 | 931.4      | 1078.0     | 1362.5     | 1379.3      | 1138.6      | 1546.0      | 1258.8      | 706.7   | 895.1   | 785.8   | 972.0    | 705.9    | 841.2    | 782.5    | 1258.8        | 785.8      | 0.6         |
| 209439_s_at  | PHKA2       | 7.11E-03 | 374.9      | 475.2      | 490.3      | 487.8       | 473.7       | 547.9       | 488.1       | 369.1   | 316.3   | 346.3   | 403.3    | 385.8    | 387.2    | 324.6    | 487.8         | 369.1      | 0.8         |
| 209438_at    | PHKA2       | 5.32E-03 | 67.5       | 85.8       | 115.8      | 97.9        | 112.9       | 96.5        | 88.3        | 57.9    | 62.8    | 64.7    | 81.9     | 69.3     | 83.0     | 61.6     | 96.5          | 64.7       | 0.7         |
| 230434_at    | PHOSPHO2    | 7.34E-03 | 64.1       | 87.8       | 67.0       | 77.8        | 58.9        | 88.5        | 72.7        | 55.5    | 59.2    | 59.7    | 58.3     | 36.0     | 60.3     | 63.7     | 72.7          | 59.2       | 0.8         |
| 209780_at    | PHTF2       | 8.70E-03 | 2195.6     | 2549.5     | 3183.6     | 2696.3      | 2885.0      | 3458.1      | 2440.8      | 1986.5  | 2155.4  | 2204.3  | 2383.6   | 1383.2   | 1752.7   | 1471.0   | 2696.3        | 1986.5     | 0.7         |
| 203335_at    | PHYH        | 1.57E-03 | 1191.7     | 1669.4     | 2089.7     | 1791.0      | 1698.3      | 1819.5      | 1817.4      | 1038.0  | 1251.7  | 1039.9  | 1289.5   | 901.6    | 943.0    | 903.9    | 1791.0        | 1038.0     | 0.6         |
| 214442_s_at  | PIAS2       | 8.45E-03 | 456.6      | 405.2      | 615.4      | 458.7       | 555.4       | 593.0       | 501.0       | 479.1   | 298.4   | 376.0   | 393.7    | 365.4    | 353.2    | 333.9    | 501.0         | 365.4      | 0.7         |
| 212688_at    | PIK3CB      | 2.22E-03 | 2628.0     | 3193.1     | 3172.3     | 3302.8      | 3093.1      | 3581.0      | 3137.0      | 2309.6  | 2429.0  | 1673.8  | 2555.2   | 1951.7   | 2371.8   | 1816.5   | 3172.3        | 2309.6     | 0.7         |
| 212239_at    | PIK3R1      | 5.10E-03 | 527.8      | 559.0      | 743.3      | 754.2       | 710.0       | 670.4       | 756.3       | 571.3   | 358.8   | 382.5   | 556.2    | 443.4    | 357.2    | 329.6    | 710.0         | 382.5      | 0.5         |
| 1568629_s_at | PIK3R2      | 8.00E-03 | 206.3      | 200.8      | 232.8      | 222.1       | 230.8       | 247.4       | 207.3       | 203.8   | 161.8   | 163.0   | 187.1    | 161.3    | 168.8    | 151.9    | 222.1         | 163.0      | 0.7         |
| 212740_at    | PIK3R4      | 7.90E-03 | 181.6      | 194.7      | 249.3      | 234.0       | 227.6       | 275.1       | 228.3       | 197.6   | 130.5   | 146.0   | 176.9    | 173.5    | 159.5    | 150.8    | 228.3         | 159.5      | 0.7         |
| 214224_s_at  | PIN4        | 2.65E-03 | 1779.0     | 2178.3     | 2405.6     | 2083.0      | 2084.2      | 2221.2      | 2000.4      | 1606.5  | 1733.2  | 1601.1  | 1541.5   | 1468.7   | 1662.5   |          |               |            |             |

Supplementary Table S2. Continued.

| ID          | Gene Symbol | p-value  | VW3_Saline | VW6_Saline | VW7_Saline | VW13_Saline | VW22_Saline | VW23_Saline | VW25_Saline | VW3_LPS | VW6_LPS | VW7_LPS | VW13_LPS | VW22_LPS | VW23_LPS | VW25_LPS | Median_saline | Median_LPS | Fold change |
|-------------|-------------|----------|------------|------------|------------|-------------|-------------|-------------|-------------|---------|---------|---------|----------|----------|----------|----------|---------------|------------|-------------|
| 212629_s_at | PKN2        | 7.69E-04 | 1832.2     | 2631.2     | 2302.2     | 1997.2      | 1954.3      | 2892.6      | 1963.5      | 1313.3  | 1705.4  | 935.7   | 1397.7   | 1323.1   | 1332.4   | 969.3    | 1997.2        | 1323.1     | 0.7         |
| 212628_at   | PKN2        | 4.28E-03 | 770.8      | 1425.3     | 1247.8     | 1091.1      | 1200.1      | 1851.5      | 1363.4      | 719.6   | 789.1   | 464.9   | 833.1    | 815.5    | 685.6    | 464.3    | 1247.8        | 719.6      | 0.6         |
| 201928_at   | PKP4        | 2.18E-03 | 387.3      | 371.2      | 390.1      | 304.0       | 378.1       | 358.3       | 354.7       | 310.2   | 270.4   | 242.9   | 272.2    | 244.3    | 204.4    | 237.1    | 371.2         | 244.3      | 0.7         |
| 204458_at   | PLA2G15     | 3.21E-03 | 359.5      | 337.5      | 324.8      | 396.3       | 308.9       | 415.4       | 342.9       | 321.0   | 149.2   | 118.0   | 235.7    | 258.7    | 214.3    | 121.8    | 342.9         | 214.3      | 0.6         |
| 235110_at   | PLA2G16     | 1.82E-03 | 253.2      | 286.9      | 296.9      | 265.3       | 246.4       | 254.4       | 266.7       | 212.3   | 219.2   | 158.3   | 210.8    | 141.3    | 165.4    | 151.2    | 265.3         | 165.4      | 0.6         |
| 210647_x_at | PLA2G6      | 8.86E-03 | 117.3      | 74.6       | 135.4      | 141.4       | 111.1       | 146.3       | 116.1       | 84.5    | 79.6    | 85.1    | 87.0     | 92.2     | 97.1     | 83.1     | 117.3         | 85.1       | 0.7         |
| 204691_x_at | PLA2G6      | 1.43E-03 | 93.5       | 83.5       | 109.7      | 103.3       | 78.9        | 113.0       | 92.5        | 72.6    | 65.6    | 65.2    | 63.9     | 59.2     | 75.2     | 72.7     | 93.5          | 65.6       | 0.7         |
| 215938_s_at | PLA2G6      | 4.41E-03 | 68.5       | 56.2       | 105.2      | 103.0       | 79.1        | 102.7       | 90.6        | 54.0    | 44.8    | 52.6    | 67.8     | 61.7     | 88.2     | 55.5     | 90.6          | 55.5       | 0.6         |
| 211668_s_at | PLAU        | 1.15E-03 | 155.6      | 131.1      | 210.0      | 186.3       | 161.8       | 186.2       | 167.6       | 138.2   | 72.1    | 84.2    | 84.1     | 100.9    | 109.5    | 104.9    | 167.6         | 100.9      | 0.6         |
| 205479_s_at | PLAU        | 4.60E-04 | 568.5      | 556.6      | 740.9      | 641.7       | 618.8       | 727.0       | 715.5       | 491.4   | 343.5   | 308.0   | 291.4    | 309.2    | 351.6    | 332.4    | 641.7         | 332.4      | 0.5         |
| 218454_at   | PLBD1       | 2.64E-03 | 4526.1     | 4435.5     | 3754.3     | 3748.2      | 3937.9      | 4041.1      | 3151.2      | 4298.1  | 3298.5  | 2345.4  | 2538.6   | 2903.9   | 2677.6   | 2207.1   | 3937.9        | 2677.6     | 0.7         |
| 227276_at   | PLXDC2      | 8.45E-04 | 2580.6     | 2803.8     | 2572.9     | 2870.9      | 2953.2      | 3195.8      | 2857.4      | 2182.0  | 1778.8  | 1183.5  | 1894.2   | 1924.6   | 1967.4   | 1529.6   | 2857.4        | 1894.2     | 0.7         |
| 210139_s_at | PMP22       | 8.55E-05 | 938.7      | 492.5      | 426.9      | 269.2       | 720.0       | 553.9       | 634.3       | 691.5   | 211.3   | 197.8   | 113.7    | 367.0    | 230.0    | 270.1    | 553.9         | 230.0      | 0.4         |
| 225298_at   | PNKD        | 4.86E-03 | 229.5      | 271.7      | 301.5      | 276.6       | 289.8       | 302.2       | 228.0       | 199.2   | 145.9   | 115.3   | 214.6    | 210.5    | 224.1    | 112.1    | 276.6         | 199.2      | 0.7         |
| 1567213_at  | PNN         | 5.71E-03 | 622.9      | 803.0      | 1019.4     | 911.4       | 632.8       | 737.1       | 774.3       | 610.9   | 635.2   | 788.1   | 688.0    | 435.2    | 444.1    | 499.1    | 774.3         | 610.9      | 0.8         |
| 220675_s_at | PNPLA3      | 9.91E-03 | 167.5      | 163.2      | 211.0      | 139.4       | 128.9       | 154.8       | 223.4       | 143.1   | 94.7    | 49.4    | 78.9     | 107.1    | 91.5     | 47.9     | 163.2         | 91.5       | 0.6         |
| 233030_at   | PNPLA3      | 1.32E-03 | 1582.7     | 2352.9     | 2042.8     | 1346.8      | 1302.8      | 1729.1      | 1980.2      | 1204.0  | 973.7   | 310.9   | 565.7    | 684.9    | 518.0    | 403.3    | 1729.1        | 565.7      | 0.3         |
| 203718_at   | PNPLA6      | 1.80E-03 | 919.3      | 1040.0     | 901.8      | 1285.8      | 728.3       | 943.8       | 847.2       | 677.9   | 470.2   | 227.4   | 574.4    | 471.1    | 674.6    | 347.7    | 919.3         | 471.1      | 0.5         |
| 218511_s_at | PNPO        | 2.77E-03 | 1048.1     | 1551.9     | 1352.2     | 1318.2      | 1041.8      | 1253.2      | 1150.1      | 934.5   | 955.7   | 639.4   | 1103.8   | 711.6    | 742.8    | 629.0    | 1253.2        | 742.8      | 0.6         |
| 218229_s_at | POGK        | 8.72E-03 | 1544.6     | 1548.7     | 1928.9     | 1640.0      | 1666.0      | 1679.9      | 1525.3      | 1374.5  | 1321.1  | 1370.9  | 1431.6   | 1039.6   | 1128.4   | 1251.5   | 1640.0        | 1321.1     | 0.8         |
| 204835_at   | POLA1       | 3.99E-03 | 146.8      | 155.1      | 175.9      | 176.9       | 191.8       | 155.5       | 190.8       | 149.1   | 94.5    | 121.1   | 139.6    | 123.1    | 97.8     | 114.8    | 175.9         | 121.1      | 0.7         |
| 205811_at   | POLG2       | 1.08E-03 | 208.8      | 278.0      | 235.8      | 244.0       | 196.9       | 267.5       | 216.5       | 177.3   | 161.0   | 112.3   | 173.0    | 140.8    | 148.0    | 115.9    | 235.8         | 148.0      | 0.6         |
| 223269_at   | POLR3GL     | 1.83E-03 | 717.9      | 877.1      | 987.9      | 965.0       | 864.5       | 1091.1      | 930.3       | 629.5   | 682.6   | 554.2   | 678.6    | 542.9    | 530.6    | 517.5    | 930.3         | 554.2      | 0.6         |
| 201876_at   | PON2        | 7.10E-03 | 513.9      | 1199.0     | 988.6      | 582.7       | 437.1       | 837.6       | 504.6       | 481.7   | 873.1   | 689.1   | 461.9    | 348.0    | 636.2    | 423.7    | 582.7         | 481.7      | 0.8         |
| 210830_s_at | PON2        | 3.84E-03 | 278.6      | 510.0      | 528.2      | 333.5       | 235.0       | 458.8       | 274.5       | 239.4   | 429.1   | 383.9   | 248.2    | 195.2    | 312.8    | 194.7    | 333.5         | 248.2      | 0.7         |
| 204839_at   | POP5        | 7.00E-03 | 623.1      | 680.0      | 527.4      | 557.0       | 553.5       | 612.3       | 643.0       | 651.7   | 360.3   | 229.4   | 436.0    | 436.4    | 314.1    | 321.3    | 612.3         | 360.3      | 0.6         |
| 209147_s_at | PPAP2A      | 7.83E-03 | 318.2      | 419.2      | 420.3      | 462.1       | 571.0       | 539.8       | 335.1       | 330.1   | 293.6   | 267.5   | 360.4    | 389.1    | 394.8    | 261.0    | 420.3         | 330.1      | 0.8         |
| 208510_s_at | PPARG       | 1.54E-03 | 4180.1     | 4064.2     | 3839.7     | 4020.0      | 3686.5      | 4739.6      | 3357.6      | 3524.9  | 2218.3  | 973.9   | 2116.7   | 1916.0   | 2363.3   | 1008.5   | 4020.0        | 2116.7     | 0.5         |
| 208994_s_at | PIIG        | 7.98E-03 | 1516.1     | 1602.8     | 1762.9     | 1711.2      | 1647.0      | 1706.8      | 1567.1      | 1242.3  | 1414.1  | 1351.7  | 1433.3   | 1187.8   | 1405.1   | 1297.4   | 1647.0        | 1351.7     | 0.8         |
| 224364_s_at | PIL3        | 1.02E-03 | 1062.6     | 1199.0     | 1034.1     | 1201.2      | 1084.3      | 1518.4      | 1220.6      | 938.0   | 772.4   | 437.5   | 784.5    | 540.9    | 707.0    | 540.4    | 1199.0        | 707.0      | 0.6         |
| 235344_at   | PPM1A       | 8.52E-03 | 184.9      | 218.3      | 272.7      | 216.4       | 288.0       | 300.9       | 250.5       | 209.6   | 154.3   | 136.9   | 173.6    | 172.9    | 159.3    | 132.0    | 250.5         | 159.3      | 0.6         |
| 227728_at   | PPM1A       | 7.14E-03 | 142.2      | 170.1      | 242.1      | 198.4       | 215.2       | 239.6       | 233.3       | 149.7   | 98.9    | 98.4    | 173.6    | 135.3    | 108.1    | 105.0    | 215.2         | 108.1      | 0.5         |
| 200726_at   | PPP1CC      | 3.68E-04 | 1192.0     | 1358.4     | 1713.4     | 1674.4      | 1653.2      | 1668.4      | 1421.7      | 873.4   | 967.0   | 741.7   | 1057.9   | 851.7    | 858.5    | 743.4    | 1653.2        | 858.5      | 0.5         |
| 229001_at   | PPP1R3E     | 7.16E-03 | 190.8      | 196.7      | 208.3      | 222.3       | 174.5       | 175.5       | 158.6       | 155.4   | 118.2   | 104.0   | 149.8    | 158.5    | 157.7    | 94.7     | 190.8         | 149.8      | 0.8         |
| 227412_at   | PPP1R3E     | 4.69E-03 | 140.4      | 189.9      | 172.9      | 157.9       | 154.1       | 193.8       | 134.6       | 137.9   | 100.4   | 66.0    | 111.3    | 119.5    | 100.0    | 55.1     | 157.9         | 100.4      | 0.6         |
| 202187_s_at | PP2R5A      | 2.15E-03 | 1042.3     | 1150.0     | 1268.7     | 1466.8      | 1519.9      | 1892.0      | 1335.6      | 1073.1  | 648.1   | 539.2   | 916.2    | 929.3    | 890.1    | 621.3    | 1335.6        | 890.1      | 0.7         |
| 200975_at   | PPT1        | 8.54E-03 | 3907.5     | 4900.6     | 5581.9     | 5612.5      | 5275.8      | 5260.7      | 5633.5      | 3757.3  | 4195.2  | 4074.1  | 4612.1   | 3911.7   | 3264.0   | 3880.5   | 5275.8        | 3911.7     | 0.7         |
| 213483_at   | PPWD1       | 6.73E-03 | 643.3      | 732.3      | 896.8      | 795.7       | 813.2       | 789.8       | 704.0       | 594.1   | 637.9   | 633.4   | 657.2    | 562.1    | 581.0    | 506.4    | 789.8         | 594.1      | 0.8         |
| 235085_at   | PRAGMIN     | 4.14E-03 | 233.1      | 253.0      | 314.1      | 296.9       | 296.7       | 297.0       | 301.5       | 219.5   | 134.6   | 88.7    | 214.5    | 171.7    | 169.1    | 117.1    | 296.9         | 169.1      | 0.6         |
| 241742_at   | PRAM1       | 1.34E-03 | 2502.0     | 2511.3     | 2381.3     | 2295.4      | 1955.3      | 2044.5      | 2142.0      | 1224.2  | 1088.2  | 283.7   | 866.3    | 1032.4   | 1112.3   | 493.0    | 2295.4        | 1032.4     | 0.4         |
| 230015_at   | PRCD        | 9.42E-03 | 103.0      | 108.8      | 134.4      | 120.4       | 117.7       | 82.9        | 85.6        | 88.5    | 88.1    | 69.9    | 84.8     | 97.3     | 61.8     | 72.9     | 108.8         | 84.8       | 0.8         |
| 205277_at   | PRDM2       | 5.22E-03 | 610.5      | 750.9      | 607.5      | 587.4       | 508.2       | 522.6       | 447.4       | 508.8   | 512.7   | 240.6   | 400.2    | 393.6    | 402.1    | 286.3    | 587.4         | 400.2      | 0.7         |
| 212217_at   | PREPL       | 2.97E-03 | 233.2      | 281.6      | 268.1      | 265.9       | 281.7       | 331.3       | 253.4       | 221.3   | 162.0   | 100.0   | 194.8    | 182.6    | 169.0    | 114.4    | 268.1         | 169.0      | 0.6         |
| 212215_at   | PREPL       | 4.30E-03 | 350.4      | 384.1      | 457.6      | 493.0       | 519.3       | 551.7       | 497.5       | 314.5   | 313.1   | 157.8   | 357.3    | 250.9    | 259.4    | 197.9    | 493.0         | 259.4      | 0.5         |
| 205053_at   | PRIM1       | 8.39E-03 | 132.6      | 167.5      | 204.7      | 170.7       | 183.2       | 207.2       | 175.9       | 163.5   | 78.9    | 68.3    | 139.4    | 95.6     | 90.9     | 67.8     | 175.9         | 90.9       | 0.5         |
| 235780_at   | PRKACB      | 4.47E-03 | 60.4       | 63.6       | 96.3       | 101.6       | 101.0       | 84.1        | 92.8        | 68.0    | 38.2    | 47.1    | 71.8     | 58.4     | 44.4     | 42.8     | 92.8          | 47.1       | 0.5         |
| 202741_at   | PRKACB      | 3.71E-04 | 1741.2     | 1928.1     | 1824.6     | 1702.7      | 1733.1      | 1756.9      | 1206.2      | 1260.0  | 1047.6  | 579.6   | 1036.6   | 810.5    | 648.3    | 464.1    | 1741.2        | 810.5      | 0.5         |
| 202742_s_at | PRKACB      | 1.71E-03 | 1169.9     | 1438.8     | 1386.4     | 1186.7      | 1340.7      | 1502.2      | 1000.2      | 955.5   | 839.2   | 471.1   | 903.7    | 598.5    | 488.1    | 363.6    | 1340.7        | 598.5      | 0.4         |
| 206099_at   | PRKCH       | 6.11E-03 | 1294.7     | 1643.0     | 1180.6     | 1194.4      | 1323.3      | 1332.5      | 1245.9      | 1264.2  | 954.5   | 798.7   | 996.7    | 931.6    | 1035.5   | 775.6    | 1294.7        | 954.5      | 0.7         |
| 207808_s_at | PROS1       | 3.77E-03 | 2170.1     | 2903.3     | 2688.4     | 2960.9      | 2738.2      | 2437.7      | 2261.0      | 1950.6  | 2383.0  | 1561.7  | 2325.3   | 1738.5   | 1797.8   | 1452.3   | 2688.4        | 1797.8     | 0.7         |
| 223230_at   | PRPF38A     | 3.22E-03 | 967.2      | 851.6      | 972.7      | 926.3       | 961.1       | 881.9       | 959.0       | 781.9   | 695.0   | 577.0   | 745.6    | 705.7    | 684.9    | 699.2    | 959.0         | 699.2      | 0.7         |
| 203401_at   | PRPS2       | 4.10E-03 | 1011.3     | 973.9      | 1243.7     | 1136.1      | 1053.8      | 1042.3      | 1012.9      | 885.7   | 737.5   | 837.0   | 1007.6   | 633.3    | 722.3    | 732.1    | 1042.3        | 737.5      | 0.7         |
| 221734_at   | PRRC1       | 7.30E-03 | 2215.0     | 1866.1     | 1855.5     | 1839.3      | 1897.1      | 2309.9      | 1722.4      | 2020.1  | 1552.8  | 1220.4  | 1625.1   | 1382.7   | 1684.9   | 1261.5   | 1866.1        | 1552.8     | 0.8         |
| 224643_at   | PRRC1       | 7.42E-03 | 537.4      | 557.0      | 775.3      | 844.3       | 726.8       | 919.1       | 822.9       | 532.5   | 475.0   | 464.0   | 665.0    | 374.9    | 531.4    | 546.6    | 775.3         | 531.4      | 0.7         |
| 211373_s_at | PSEN2       | 8.95E-03 | 756.4      | 733.7      | 739.7      | 636.4       | 585.5       | 636.5       | 518.7       | 656.8   | 597.8   | 495.3   | 526.4    | 516.5    | 521.1    | 379.6    | 636.5         | 521.1      | 0.8         |
| 205961_s_at | PSIP1       | 9.71E-03 | 165.1      | 183.9      | 275.2      | 236.5       | 187.7       | 240.2       | 191.9       | 171.2   | 127.3   | 89.4    | 178.7    | 132.6    | 126.6    | 85.4     | 191.9         | 127.3      | 0.7         |
| 209337_at   | PSIP1       | 2.68E-03 | 220.6      | 238.7      | 390.7      | 387.5       | 346.3       | 384.4       | 292.1       | 226.7   | 129.9   | 121.3   | 248.0    | 164.8    | 181.0    | 142.4    | 346.3         | 164.8      | 0.5         |
| 228020_at   | PTCD3       | 1.49E-03 | 176.7      | 193.6      | 210.4      | 298.3       | 251.1       | 267.2       | 201.5       | 157.6   | 131.3   | 128     |          |          |          |          |               |            |             |



TRANSCRIPTION PROFILES IN ALVEOLAR MACROPHAGES

Supplementary Table S2. Continued.

| ID           | Gene Symbol | p-value  | VW3_Saline | VW6_Saline | VW7_Saline | VW13_Saline | VW22_Saline | VW23_Saline | VW25_Saline | VW3_LPS | VW6_LPS | VW7_LPS | VW13_LPS | VW22_LPS | VW23_LPS | VW25_LPS | Median_saline | Median_LPS | Fold change |
|--------------|-------------|----------|------------|------------|------------|-------------|-------------|-------------|-------------|---------|---------|---------|----------|----------|----------|----------|---------------|------------|-------------|
| 229535_at    | PTPMT1      | 2.27E-03 | 279.4      | 242.6      | 311.7      | 276.4       | 273.2       | 311.2       | 279.7       | 253.8   | 144.3   | 156.5   | 215.7    | 183.8    | 212.3    | 162.3    | 279.4         | 183.8      | 0.7         |
| 203555_at    | PTPN18      | 5.62E-03 | 1716.4     | 2070.1     | 1593.2     | 1750.1      | 1601.9      | 1840.7      | 1217.3      | 1606.3  | 1181.2  | 770.3   | 1240.8   | 1333.2   | 1310.3   | 849.8    | 1716.4        | 1240.8     | 0.7         |
| 213521_at    | PTPN18      | 6.73E-03 | 663.1      | 785.7      | 772.9      | 782.3       | 656.7       | 743.7       | 644.3       | 565.5   | 493.5   | 290.0   | 506.4    | 598.8    | 516.7    | 366.4    | 743.7         | 506.4      | 0.7         |
| 206060_s_at  | PTPN22      | 1.97E-03 | 282.1      | 421.4      | 387.0      | 359.5       | 378.6       | 445.2       | 336.5       | 245.4   | 210.4   | 92.9    | 215.5    | 209.1    | 148.5    | 96.1     | 378.6         | 209.1      | 0.6         |
| 208010_s_at  | PTPN22      | 9.22E-03 | 184.2      | 392.7      | 487.2      | 415.5       | 383.9       | 483.3       | 398.3       | 253.5   | 189.8   | 145.1   | 272.2    | 215.9    | 176.8    | 141.2    | 398.3         | 189.8      | 0.5         |
| 1555579_s_at | PTPRM       | 2.60E-03 | 927.6      | 907.6      | 928.5      | 1042.8      | 1167.3      | 958.2       | 872.9       | 774.5   | 748.5   | 680.5   | 823.4    | 865.3    | 722.9    | 628.3    | 928.5         | 748.5      | 0.8         |
| 203329_at    | PTPRM       | 2.53E-03 | 816.0      | 798.7      | 774.4      | 826.8       | 931.1       | 728.7       | 714.1       | 694.4   | 636.1   | 536.5   | 624.6    | 699.0    | 568.9    | 534.9    | 798.7         | 624.6      | 0.8         |
| 1555578_at   | PTPRM       | 7.95E-03 | 55.3       | 47.5       | 75.2       | 69.2        | 81.5        | 83.8        | 74.9        | 52.8    | 41.4    | 49.7    | 56.5     | 43.7     | 46.8     | 36.7     | 74.9          | 46.8       | 0.6         |
| 208121_s_at  | PTPRO       | 8.34E-03 | 3361.1     | 4262.1     | 4307.8     | 3851.9      | 3722.2      | 4382.5      | 3773.3      | 3075.8  | 3707.0  | 2746.5  | 3487.1   | 2474.2   | 2877.8   | 2583.0   | 3851.9        | 2877.8     | 0.7         |
| 211846_s_at  | PVRL1       | 8.26E-03 | 170.9      | 127.3      | 125.4      | 151.7       | 159.7       | 140.7       | 145.7       | 137.6   | 115.5   | 108.0   | 127.5    | 121.7    | 103.2    | 105.2    | 145.7         | 115.5      | 0.8         |
| 1558290_a_at | PVT1        | 5.84E-03 | 208.7      | 322.9      | 230.2      | 284.6       | 154.6       | 305.7       | 265.2       | 203.8   | 203.7   | 153.4   | 189.3    | 138.3    | 178.0    | 182.4    | 265.2         | 182.4      | 0.7         |
| 221666_s_at  | PYCARD      | 4.89E-03 | 1911.0     | 1907.9     | 2020.3     | 2247.0      | 1777.1      | 2343.2      | 1942.4      | 1545.8  | 1189.1  | 592.1   | 1262.1   | 1329.9   | 1750.5   | 868.2    | 1942.4        | 1262.1     | 0.6         |
| 202990_at    | PYGL        | 5.68E-04 | 1833.0     | 1262.1     | 1530.2     | 1070.6      | 1574.3      | 1741.6      | 1130.0      | 1382.6  | 834.5   | 623.2   | 681.7    | 897.0    | 896.1    | 466.2    | 1530.2        | 834.5      | 0.5         |
| 239857_at    | QDPR        | 7.19E-03 | 155.7      | 173.9      | 229.5      | 228.9       | 189.3       | 218.6       | 186.4       | 143.7   | 133.4   | 121.6   | 193.6    | 111.5    | 156.7    | 143.7    | 189.3         | 143.7      | 0.8         |
| 1556205_at   | QDPR        | 4.26E-04 | 242.1      | 212.3      | 204.5      | 267.9       | 180.0       | 191.6       | 190.5       | 153.3   | 116.7   | 96.9    | 144.4    | 119.9    | 151.1    | 122.7    | 204.5         | 122.7      | 0.6         |
| 242414_at    | QPR1        | 8.30E-03 | 133.2      | 159.7      | 139.2      | 152.1       | 159.4       | 192.3       | 122.5       | 134.3   | 127.0   | 78.8    | 121.7    | 122.8    | 118.6    | 73.7     | 152.1         | 121.7      | 0.8         |
| 203831_at    | R3HDM2      | 4.91E-03 | 1409.0     | 1569.2     | 2288.1     | 1951.9      | 1975.0      | 2117.4      | 2090.4      | 1195.0  | 1445.2  | 1586.6  | 1580.5   | 1252.9   | 1294.5   | 1343.1   | 1975.0        | 1343.1     | 0.7         |
| 219681_s_at  | RAB11FIP1   | 4.49E-03 | 749.4      | 896.4      | 1084.2     | 1042.9      | 951.8       | 1154.7      | 1090.7      | 688.4   | 684.8   | 403.1   | 828.9    | 483.8    | 583.1    | 525.7    | 1042.9        | 583.1      | 0.6         |
| 225177_at    | RAB11FIP1   | 1.40E-03 | 1578.4     | 1698.1     | 1197.9     | 1332.1      | 1128.9      | 1216.3      | 900.0       | 1181.3  | 796.0   | 221.5   | 657.7    | 586.6    | 597.2    | 341.9    | 1216.3        | 597.2      | 0.5         |
| 224482_s_at  | RAB11FIP4   | 8.10E-03 | 61.4       | 55.6       | 83.4       | 108.1       | 61.9        | 85.3        | 58.1        | 49.5    | 47.6    | 40.7    | 49.7     | 49.0     | 46.0     | 50.4     | 61.9          | 49.0       | 0.8         |
| 213440_at    | RAB1A       | 9.31E-03 | 1725.1     | 1536.9     | 2108.8     | 2069.0      | 1815.5      | 1980.7      | 2029.8      | 1455.3  | 1482.6  | 1625.7  | 1694.9   | 1388.1   | 1439.9   | 1479.9   | 1980.7        | 1479.9     | 0.7         |
| 209515_s_at  | RAB27A      | 1.32E-03 | 707.2      | 688.2      | 686.9      | 971.1       | 695.0       | 737.7       | 993.4       | 596.7   | 526.3   | 421.3   | 691.0    | 481.3    | 547.2    | 630.8    | 707.2         | 547.2      | 0.8         |
| 203581_at    | RAB4A       | 4.05E-03 | 479.7      | 542.2      | 598.9      | 579.8       | 555.5       | 777.7       | 521.6       | 430.4   | 448.9   | 380.9   | 447.4    | 270.2    | 410.8    | 326.1    | 555.5         | 410.8      | 0.7         |
| 203582_s_at  | RAB4A       | 4.22E-03 | 674.6      | 666.1      | 725.0      | 671.0       | 599.7       | 712.1       | 548.1       | 657.8   | 482.2   | 437.8   | 495.2    | 410.3    | 505.5    | 419.1    | 671.0         | 482.2      | 0.7         |
| 209849_s_at  | RAD51C      | 8.00E-03 | 223.6      | 302.0      | 280.6      | 266.0       | 406.8       | 356.8       | 314.5       | 193.9   | 243.8   | 166.5   | 253.7    | 253.3    | 232.5    | 149.2    | 302.0         | 232.5      | 0.8         |
| 224880_at    | RALA        | 3.95E-03 | 1581.6     | 1378.9     | 1405.1     | 1588.7      | 1656.7      | 1338.5      | 1802.6      | 1371.1  | 1189.7  | 953.8   | 1263.8   | 1119.5   | 914.3    | 1383.5   | 1581.6        | 1189.7     | 0.8         |
| 202844_s_at  | RALBP1      | 3.64E-03 | 882.5      | 938.7      | 1042.4     | 993.8       | 1003.5      | 1043.2      | 839.8       | 748.0   | 801.3   | 710.4   | 798.8    | 635.9    | 733.9    | 643.5    | 993.8         | 733.9      | 0.7         |
| 213019_at    | RANBP6      | 3.26E-03 | 428.6      | 449.2      | 562.5      | 625.5       | 552.7       | 620.1       | 679.8       | 370.5   | 394.4   | 417.0   | 465.7    | 351.2    | 404.1    | 441.6    | 562.5         | 404.1      | 0.7         |
| 229905_at    | RAP1GDS1    | 3.54E-03 | 476.4      | 520.7      | 505.8      | 591.1       | 501.8       | 696.9       | 536.3       | 442.0   | 420.1   | 325.0   | 456.6    | 326.2    | 465.8    | 302.8    | 520.7         | 420.1      | 0.8         |
| 210051_at    | RAPGEF3     | 2.80E-03 | 270.4      | 202.9      | 240.8      | 223.0       | 239.8       | 240.0       | 208.2       | 189.4   | 180.1   | 143.9   | 117.6    | 188.1    | 183.0    | 117.2    | 239.8         | 180.1      | 0.8         |
| 216300_x_at  | RARA        | 4.00E-03 | 205.6      | 170.4      | 261.6      | 268.0       | 204.6       | 282.1       | 204.0       | 168.8   | 128.2   | 117.2   | 194.2    | 163.9    | 190.4    | 135.6    | 205.6         | 163.9      | 0.8         |
| 203749_s_at  | RARA        | 4.53E-03 | 395.2      | 390.7      | 492.9      | 495.0       | 396.3       | 502.9       | 353.4       | 364.4   | 233.1   | 197.0   | 348.8    | 277.2    | 363.7    | 273.2    | 396.3         | 277.2      | 0.7         |
| 234343_s_at  | RASAL2      | 4.79E-03 | 724.5      | 866.7      | 874.8      | 798.2       | 796.5       | 979.4       | 686.3       | 678.2   | 548.0   | 350.7   | 635.3    | 581.7    | 544.9    | 362.7    | 798.2         | 548.0      | 0.7         |
| 222810_s_at  | RASAL2      | 3.05E-03 | 267.0      | 322.9      | 280.6      | 288.5       | 355.7       | 317.7       | 228.4       | 263.1   | 184.3   | 118.1   | 233.0    | 171.7    | 150.4    | 121.4    | 288.5         | 171.7      | 0.6         |
| 234910_at    | RASAL2      | 3.11E-03 | 528.1      | 815.3      | 753.2      | 839.1       | 789.8       | 934.7       | 655.3       | 588.3   | 438.9   | 305.5   | 553.4    | 390.6    | 467.9    | 326.2    | 789.8         | 438.9      | 0.6         |
| 219026_s_at  | RASAL2      | 9.76E-04 | 332.2      | 375.6      | 415.0      | 472.1       | 388.1       | 502.3       | 357.4       | 284.4   | 209.7   | 163.9   | 335.1    | 207.3    | 255.6    | 159.7    | 388.1         | 209.7      | 0.5         |
| 227036_at    | RASAL2      | 3.29E-03 | 1056.6     | 1600.7     | 1736.3     | 1821.2      | 1818.2      | 2179.5      | 1764.0      | 1040.6  | 965.0   | 503.0   | 1298.1   | 681.5    | 797.2    | 560.2    | 1764.0        | 797.2      | 0.5         |
| 214369_s_at  | RASGRP2     | 3.14E-03 | 204.4      | 213.7      | 176.9      | 317.8       | 194.3       | 267.7       | 172.3       | 167.9   | 111.8   | 94.9    | 200.4    | 163.2    | 209.6    | 121.9    | 204.4         | 163.2      | 0.8         |
| 208206_s_at  | RASGRP2     | 1.72E-03 | 190.6      | 203.7      | 198.7      | 344.8       | 197.7       | 270.7       | 234.3       | 139.7   | 124.2   | 85.4    | 197.7    | 155.2    | 207.5    | 107.5    | 203.7         | 139.7      | 0.7         |
| 204346_s_at  | RASSF1      | 1.45E-03 | 267.1      | 315.1      | 290.2      | 259.7       | 244.8       | 290.4       | 238.9       | 219.0   | 188.0   | 125.5   | 183.8    | 172.8    | 191.0    | 144.9    | 267.1         | 183.8      | 0.7         |
| 225396_at    | RBBP4       | 8.31E-03 | 218.6      | 187.2      | 206.4      | 236.1       | 274.7       | 256.9       | 248.7       | 228.8   | 149.1   | 117.4   | 184.1    | 182.5    | 178.4    | 164.9    | 236.1         | 178.4      | 0.8         |
| 210371_s_at  | RBBP4       | 8.37E-03 | 824.2      | 919.8      | 1388.4     | 1269.5      | 1102.3      | 1362.8      | 1339.4      | 790.9   | 727.0   | 951.5   | 1122.2   | 815.4    | 857.0    | 772.9    | 1269.5        | 815.4      | 0.6         |
| 237333_at    | RBBP4       | 6.80E-03 | 217.4      | 227.7      | 358.0      | 379.4       | 393.3       | 385.0       | 426.1       | 231.6   | 153.5   | 222.8   | 306.8    | 241.8    | 212.1    | 196.8    | 379.4         | 222.8      | 0.6         |
| 212331_at    | RBL2        | 9.40E-03 | 306.8      | 323.3      | 558.7      | 487.6       | 492.1       | 563.2       | 494.1       | 303.4   | 295.7   | 372.0   | 373.7    | 264.3    | 276.2    | 287.2    | 492.1         | 295.7      | 0.6         |
| 213852_at    | RBMSA       | 1.53E-03 | 352.0      | 339.0      | 423.7      | 485.3       | 397.9       | 391.2       | 430.0       | 315.5   | 252.8   | 194.7   | 322.1    | 208.6    | 204.4    | 220.8    | 397.9         | 220.8      | 0.6         |
| 225778_at    | RBMS2       | 8.17E-03 | 701.7      | 963.4      | 694.6      | 796.5       | 788.5       | 770.2       | 785.4       | 739.6   | 547.3   | 409.5   | 637.8    | 597.5    | 467.6    | 570.3    | 785.4         | 570.3      | 0.7         |
| 211974_x_at  | RBPJ        | 5.22E-03 | 5215.4     | 4793.5     | 4577.4     | 5089.6      | 4659.8      | 4701.2      | 3859.0      | 4443.7  | 3606.8  | 2398.4  | 3798.7   | 3684.8   | 3754.1   | 2865.3   | 4701.2        | 3684.8     | 0.8         |
| 207785_s_at  | RBPJ        | 3.77E-03 | 1732.7     | 1677.1     | 2162.1     | 2475.8      | 2086.5      | 2433.5      | 1923.8      | 1482.2  | 1418.8  | 1355.0  | 2033.8   | 1253.5   | 1261.6   | 1213.6   | 2086.5        | 1355.0     | 0.6         |
| 226272_at    | RCAN3       | 5.51E-03 | 253.6      | 334.0      | 298.6      | 308.4       | 286.8       | 310.5       | 269.4       | 254.8   | 218.3   | 185.7   | 264.8    | 187.4    | 181.6    | 185.4    | 298.6         | 187.4      | 0.6         |
| 224578_at    | RCC2        | 9.76E-03 | 3484.5     | 3235.7     | 3340.5     | 4028.5      | 3422.4      | 3133.4      | 3189.4      | 2969.1  | 2307.9  | 1647.4  | 2915.9   | 2755.7   | 2800.9   | 2449.1   | 3340.5        | 2755.7     | 0.8         |
| 226488_at    | RCCD1       | 4.14E-03 | 242.7      | 225.4      | 302.8      | 257.3       | 220.1       | 227.2       | 218.9       | 215.7   | 178.5   | 164.2   | 194.4    | 173.2    | 156.1    | 127.2    | 227.2         | 173.2      | 0.8         |
| 222666_s_at  | RCL1        | 9.62E-03 | 452.2      | 556.1      | 517.9      | 509.4       | 489.2       | 485.5       | 398.2       | 415.6   | 371.9   | 294.4   | 459.5    | 338.8    | 405.2    | 300.1    | 489.2         | 371.9      | 0.8         |
| 218544_s_at  | RCL1        | 2.43E-03 | 201.3      | 291.6      | 253.6      | 304.3       | 245.5       | 298.3       | 229.7       | 186.1   | 170.7   | 144.0   | 248.3    | 150.8    | 197.0    | 118.0    | 253.6         | 170.7      | 0.7         |
| 201485_s_at  | RCN2        | 8.12E-03 | 386.0      | 354.2      | 382.5      | 386.7       | 316.9       | 349.0       | 362.7       | 307.3   | 251.4   | 229.0   | 311.7    | 302.1    | 281.8    | 270.7    | 362.7         | 281.8      | 0.8         |
| 227467_at    | RDH10       | 4.39E-04 | 687.6      | 815.6      | 888.6      | 987.7       | 965.0       | 1035.8      | 517.6       | 421.6   | 461.0   | 196.6   | 485.8    | 469.7    | 348.0    | 149.5    | 888.6         | 421.6      | 0.5         |
| 1552378_s_at | RDH10       | 1.49E-03 | 184.5      | 236.1      | 286.7      | 332.8       | 280.5       | 308.7       | 175.4       | 166.7   | 113.7   | 81.4    | 170.4    | 163.7    | 109.7    | 49.0     | 280.5         | 113.7      | 0.4         |
| 226021_at    | RDH10       | 1.69E-03 | 287.5      | 492.6      | 712.9      | 781.4       | 640.2       | 725.3       | 426.5       | 291.4   | 209.7   | 147.7   | 341.9    | 256.2    | 199.6    | 86.1     | 640.2         | 209.7      | 0.3         |
| 1559190_s_at | RDH13       | 3.06E-03 | 78.1       | 97.6       | 90.1       | 69.6        | 76.4        | 92.5        | 59.5        | 62.4    | 70.0    |         |          |          |          |          |               |            |             |

Supplementary Table S2. Continued.

| ID           | Gene Symbol                       | p-value  | VW3_Saline | VW6_Saline | VW7_Saline | VW13_Saline | VW22_Saline | VW23_Saline | VW25_Saline | VW3_LPS | VW6_LPS | VW7_LPS | VW13_LPS | VW22_LPS | VW23_LPS | VW25_LPS | Median_saline | Median_LPS | Fold change |
|--------------|-----------------------------------|----------|------------|------------|------------|-------------|-------------|-------------|-------------|---------|---------|---------|----------|----------|----------|----------|---------------|------------|-------------|
| 1560348_at   | RGNEF                             | 1.49E-03 | 396.2      | 560.2      | 609.0      | 766.3       | 377.5       | 469.0       | 440.0       | 286.9   | 321.2   | 97.7    | 381.6    | 137.0    | 194.9    | 114.0    | 469.0         | 194.9      | 0.4         |
| 1554003_at   | RGNEF                             | 1.57E-03 | 911.9      | 1184.9     | 1258.1     | 1957.6      | 1162.4      | 1522.8      | 1409.9      | 685.1   | 729.6   | 187.0   | 911.2    | 353.1    | 502.4    | 347.9    | 1258.1        | 502.4      | 0.4         |
| 232994_s_at  | RGNEF                             | 2.27E-03 | 347.3      | 565.3      | 532.8      | 642.9       | 423.5       | 449.0       | 424.5       | 287.5   | 324.2   | 84.7    | 362.0    | 133.8    | 154.0    | 103.5    | 449.0         | 154.0      | 0.3         |
| 219610_at    | RGNEF                             | 3.37E-03 | 158.6      | 202.8      | 298.7      | 409.2       | 174.5       | 207.3       | 176.9       | 154.8   | 119.6   | 47.1    | 188.6    | 64.4     | 62.9     | 32.1     | 202.8         | 64.4       | 0.3         |
| 1554004_a_at | RGNEF                             | 1.21E-03 | 358.1      | 579.2      | 466.2      | 728.0       | 434.7       | 507.9       | 494.5       | 294.1   | 268.2   | 66.0    | 328.9    | 122.7    | 146.5    | 99.9     | 494.5         | 146.5      | 0.3         |
| 205823_at    | RGS12                             | 6.45E-03 | 288.6      | 252.8      | 334.3      | 280.4       | 221.2       | 254.7       | 255.0       | 224.0   | 197.4   | 205.2   | 202.0    | 209.8    | 212.5    | 169.3    | 255.0         | 205.2      | 0.8         |
| 223809_at    | RGS18                             | 7.99E-03 | 78.1       | 234.4      | 216.7      | 263.8       | 315.4       | 626.7       | 173.4       | 69.1    | 176.5   | 107.1   | 156.6    | 263.7    | 177.8    | 78.4     | 234.4         | 156.6      | 0.7         |
| 232053_x_at  | RHBDD2                            | 9.29E-03 | 292.1      | 322.8      | 452.1      | 483.0       | 274.6       | 407.4       | 337.0       | 300.8   | 141.4   | 141.3   | 282.2    | 221.6    | 301.8    | 149.1    | 337.0         | 221.6      | 0.7         |
| 222995_s_at  | RHBDD2                            | 3.24E-03 | 857.2      | 793.6      | 867.5      | 1105.2      | 589.5       | 864.0       | 851.5       | 610.4   | 381.3   | 230.6   | 549.3    | 466.3    | 627.6    | 423.3    | 857.2         | 466.3      | 0.5         |
| 212099_at    | RHOB                              | 2.86E-04 | 2336.7     | 2867.1     | 2173.5     | 2185.7      | 1666.6      | 2303.2      | 1843.5      | 1594.5  | 1772.8  | 889.4   | 1287.0   | 1147.7   | 1186.3   | 1002.3   | 2185.7        | 1186.3     | 0.5         |
| 212651_at    | RHOBTB1                           | 2.61E-03 | 93.0       | 101.2      | 228.6      | 185.8       | 177.0       | 225.6       | 200.9       | 94.0    | 46.8    | 53.3    | 114.6    | 49.9     | 47.1     | 43.6     | 185.8         | 49.9       | 0.3         |
| 209441_at    | RHOBTB2                           | 3.19E-03 | 109.8      | 77.4       | 138.5      | 141.0       | 95.2        | 125.1       | 97.7        | 89.3    | 50.0    | 43.5    | 70.7     | 80.7     | 63.0     | 48.0     | 109.8         | 63.0       | 0.6         |
| 1554586_a_at | RHOBTB2                           | 1.10E-03 | 318.1      | 273.2      | 333.1      | 311.7       | 244.2       | 361.4       | 276.7       | 262.4   | 125.7   | 109.0   | 168.1    | 159.5    | 196.8    | 96.4     | 311.7         | 159.5      | 0.5         |
| 230062_at    | RIMBP3 ///<br>RIMBP3B /// RIMBP3C | 7.10E-03 | 174.3      | 169.1      | 192.5      | 198.9       | 199.3       | 270.4       | 216.2       | 174.2   | 104.4   | 76.3    | 96.2     | 180.2    | 155.2    | 129.3    | 198.9         | 129.3      | 0.7         |
| 219457_s_at  | RIN3                              | 8.90E-03 | 302.4      | 337.2      | 361.9      | 448.1       | 331.6       | 375.4       | 372.9       | 262.3   | 182.1   | 119.4   | 238.4    | 308.4    | 299.8    | 175.8    | 361.9         | 238.4      | 0.7         |
| 1555201_a_at | RMND1                             | 1.61E-03 | 330.8      | 287.7      | 296.0      | 326.4       | 315.7       | 369.9       | 283.5       | 287.2   | 196.6   | 214.8   | 215.4    | 240.1    | 272.8    | 206.0    | 315.7         | 215.4      | 0.7         |
| 220329_s_at  | RMND1                             | 7.65E-03 | 333.7      | 388.2      | 499.5      | 442.6       | 451.5       | 595.9       | 433.4       | 392.8   | 255.6   | 276.2   | 327.8    | 276.9    | 340.8    | 236.3    | 442.6         | 276.9      | 0.6         |
| 212479_s_at  | RMND5A                            | 2.64E-03 | 701.4      | 1005.7     | 902.7      | 841.8       | 860.3       | 984.7       | 846.4       | 643.6   | 708.5   | 576.8   | 682.1    | 610.8    | 583.1    | 532.1    | 860.3         | 610.8      | 0.7         |
| 212482_at    | RMND5A                            | 3.16E-03 | 146.4      | 196.7      | 208.5      | 199.7       | 207.2       | 210.0       | 188.1       | 152.8   | 119.8   | 117.1   | 147.6    | 126.9    | 113.4    | 99.3     | 199.7         | 119.8      | 0.6         |
| 229285_at    | RNASEL                            | 4.15E-03 | 1212.8     | 1353.3     | 1426.6     | 1374.2      | 1488.4      | 1732.7      | 1508.7      | 1086.0  | 1047.8  | 972.6   | 1143.7   | 747.6    | 1016.2   | 813.2    | 1426.6        | 1016.2     | 0.7         |
| 221287_at    | RNASEL                            | 4.11E-03 | 449.3      | 451.7      | 428.3      | 440.7       | 469.7       | 487.7       | 419.2       | 422.1   | 316.1   | 275.5   | 374.5    | 304.4    | 344.3    | 303.7    | 449.3         | 316.1      | 0.7         |
| 217983_s_at  | RNASET2                           | 1.71E-03 | 1244.4     | 1518.6     | 1610.8     | 1431.4      | 1217.0      | 1259.2      | 1039.3      | 1098.2  | 1093.1  | 909.1   | 1003.8   | 921.6    | 815.1    | 613.6    | 1259.2        | 921.6      | 0.7         |
| 217984_at    | RNASET2                           | 1.72E-03 | 3011.8     | 3304.4     | 3121.5     | 3009.1      | 2747.8      | 2682.8      | 2036.4      | 2550.5  | 2316.9  | 1601.8  | 2006.1   | 2192.0   | 1702.4   | 1304.8   | 3009.1        | 2006.1     | 0.7         |
| 209565_at    | RNF113A                           | 4.50E-03 | 518.8      | 559.0      | 565.3      | 543.4       | 521.5       | 542.7       | 467.6       | 473.3   | 372.9   | 347.5   | 431.2    | 418.2    | 397.2    | 359.2    | 542.7         | 397.2      | 0.7         |
| 217865_at    | RNF130                            | 9.70E-03 | 3331.0     | 3530.4     | 3612.9     | 3124.1      | 3541.6      | 3083.3      | 2701.4      | 3126.1  | 2569.3  | 2198.8  | 2384.1   | 3109.2   | 2522.1   | 2011.5   | 3331.0        | 2522.1     | 0.8         |
| 1553127_a_at | RNF168                            | 3.11E-03 | 294.7      | 342.1      | 299.8      | 344.6       | 362.9       | 432.1       | 353.6       | 295.7   | 227.2   | 169.3   | 245.0    | 260.4    | 267.1    | 203.1    | 344.6         | 245.0      | 0.7         |
| 203286_at    | RNF44                             | 7.29E-03 | 262.9      | 218.9      | 325.7      | 318.1       | 285.5       | 331.7       | 282.7       | 238.1   | 192.4   | 201.1   | 258.3    | 219.2    | 191.3    | 157.8    | 285.5         | 201.1      | 0.7         |
| 202683_s_at  | RNMT                              | 3.95E-03 | 1344.4     | 1233.7     | 1343.1     | 1405.4      | 1344.7      | 1406.2      | 1481.9      | 1168.2  | 981.9   | 993.6   | 1197.6   | 1003.3   | 1030.2   | 1084.4   | 1344.7        | 1030.2     | 0.8         |
| 218291_at    | ROBLD3                            | 8.92E-03 | 847.8      | 780.9      | 825.6      | 920.4       | 730.5       | 781.5       | 689.8       | 668.8   | 577.9   | 477.3   | 656.2    | 669.3    | 697.0    | 533.0    | 781.5         | 656.2      | 0.8         |
| 219550_at    | ROBO3                             | 4.85E-03 | 126.3      | 174.5      | 247.5      | 165.2       | 170.9       | 135.7       | 212.5       | 92.9    | 107.0   | 189.0   | 155.4    | 107.4    | 113.5    | 147.0    | 170.9         | 113.5      | 0.7         |
| 218394_at    | ROGDI                             | 4.85E-03 | 330.2      | 624.6      | 483.1      | 540.1       | 363.1       | 576.1       | 350.2       | 346.3   | 312.3   | 160.1   | 380.9    | 247.3    | 274.0    | 149.9    | 483.1         | 274.0      | 0.6         |
| 217122_s_at  | RP11-<br>345P4.4                  | 8.12E-03 | 1039.7     | 1268.0     | 1150.5     | 1135.3      | 1064.4      | 1195.8      | 836.4       | 1027.8  | 676.7   | 476.2   | 900.6    | 782.0    | 837.9    | 543.6    | 1135.3        | 782.0      | 0.7         |
| 213478_at    | RP1-21O18.13.99E-03               | 337.6    | 347.6      | 421.5      | 365.1      | 396.2       | 474.0       | 445.2       | 319.9       | 178.5   | 175.8   | 250.5   | 263.1    | 297.4    | 145.3    | 396.2    | 250.5         | 0.6        |             |
| 229144_at    | RP1-21O18.12.93E-03               | 77.6     | 73.5       | 104.6      | 70.1       | 96.5        | 127.6       | 89.1        | 61.9        | 45.5    | 25.6    | 49.5    | 56.2     | 53.3     | 38.2     | 89.1     | 49.5          | 0.6        |             |
| 224826_at    | RP5-<br>1022P6.2                  | 1.95E-03 | 2378.5     | 2148.3     | 2365.8     | 2657.8      | 2895.8      | 3140.6      | 2855.5      | 1995.3  | 1566.9  | 1356.6  | 2240.0   | 1846.2   | 2135.6   | 1695.3   | 2657.8        | 1846.2     | 0.7         |
| 230492_s_at  | RP5-<br>1022P6.2                  | 4.51E-03 | 844.1      | 725.3      | 930.7      | 1222.9      | 1035.3      | 1097.7      | 1185.6      | 670.1   | 679.6   | 716.3   | 774.4    | 677.6    | 869.3    | 764.1    | 1035.3        | 716.3      | 0.7         |
| 224835_at    | RP5-<br>1022P6.2                  | 4.92E-04 | 2815.3     | 2671.8     | 2436.4     | 2978.5      | 3255.4      | 3427.6      | 3000.3      | 2000.9  | 1756.7  | 979.3   | 1945.6   | 1828.0   | 2224.6   | 1579.8   | 2978.5        | 1828.0     | 0.6         |
| 201529_s_at  | RPA1                              | 4.14E-03 | 349.3      | 272.1      | 332.8      | 309.5       | 307.7       | 260.5       | 303.2       | 306.5   | 159.3   | 144.5   | 211.5    | 249.7    | 196.1    | 166.1    | 307.7         | 196.1      | 0.6         |
| 225040_s_at  | RPE                               | 5.40E-03 | 668.8      | 858.2      | 1001.1     | 781.9       | 760.1       | 895.7       | 670.1       | 611.7   | 689.5   | 527.3   | 677.9    | 481.4    | 525.2    | 433.9    | 781.9         | 527.3      | 0.7         |
| 225039_at    | RPE                               | 1.78E-03 | 300.0      | 420.5      | 439.1      | 397.4       | 375.6       | 470.7       | 358.5       | 269.0   | 275.1   | 245.8   | 312.6    | 236.3    | 237.5    | 189.1    | 397.4         | 245.8      | 0.6         |
| 221476_s_at  | RPL15                             | 9.59E-03 | 3883.2     | 4071.9     | 4946.7     | 4498.3      | 5109.9      | 5482.5      | 5604.8      | 3868.1  | 3327.0  | 3544.0  | 3868.2   | 3618.0   | 3534.3   | 3428.0   | 4946.7        | 3544.0     | 0.7         |
| 223415_at    | RPP25                             | 7.30E-03 | 96.4       | 76.5       | 97.1       | 125.9       | 105.7       | 98.8        | 82.1        | 72.4    | 68.3    | 40.2    | 64.1     | 72.9     | 71.9     | 66.9     | 97.1          | 68.3       | 0.7         |
| 219143_s_at  | RPP25                             | 5.95E-03 | 167.9      | 135.3      | 211.0      | 186.8       | 185.1       | 186.8       | 171.5       | 150.4   | 93.4    | 71.7    | 108.0    | 147.3    | 126.7    | 75.8     | 185.1         | 108.0      | 0.6         |
| 212553_at    | RPRD2                             | 8.22E-03 | 290.6      | 386.4      | 593.8      | 497.0       | 492.3       | 613.7       | 545.6       | 362.9   | 237.0   | 273.2   | 358.7    | 279.4    | 277.2    | 255.5    | 497.0         | 277.2      | 0.6         |
| 226527_at    | RPRD2                             | 5.02E-03 | 207.5      | 261.1      | 288.5      | 318.7       | 323.2       | 373.8       | 330.1       | 210.9   | 172.3   | 123.6   | 240.1    | 181.6    | 173.9    | 112.1    | 318.7         | 173.9      | 0.5         |
| 235415_at    | RPRD2                             | 5.68E-03 | 221.8      | 258.2      | 336.7      | 298.2       | 338.3       | 439.7       | 337.2       | 221.2   | 163.2   | 155.1   | 259.5    | 179.9    | 164.9    | 173.2    | 336.7         | 173.2      | 0.5         |
| 235309_at    | RPS15A                            | 2.09E-03 | 403.0      | 512.3      | 349.9      | 419.1       | 371.7       | 457.7       | 388.8       | 379.7   | 267.5   | 168.1   | 243.7    | 270.3    | 223.7    | 142.0    | 403.0         | 243.7      | 0.6         |
| 218007_s_at  | RPS27L                            | 5.01E-03 | 4518.3     | 4759.3     | 5110.3     | 4647.2      | 4628.6      | 5545.0      | 5286.6      | 4150.3  | 3846.9  | 3183.7  | 3926.5   | 3174.8   | 3829.2   | 3069.3   | 4759.3        | 3829.2     | 0.8         |
| 222487_s_at  | RPS27L                            | 1.52E-03 | 4423.2     | 4780.5     | 5037.7     | 4808.4      | 4675.9      | 5311.3      | 4789.3      | 3743.7  | 3783.1  | 3207.6  | 3653.5   | 3123.2   | 3506.0   | 2888.1   | 4789.3        | 3506.0     | 0.7         |
| 203379_at    | RPS6KA1                           | 4.73E-03 | 1092.9     | 1041.4     | 1041.9     | 1219.3      | 1057.7      | 1069.6      | 1078.9      | 1049.8  | 687.5   | 554.5   | 760.7    | 868.1    | 818.6    | 634.6    | 1069.6        | 760.7      | 0.7         |
| 212912_at    | RPS6KA2                           | 3.20E-03 | 204.3      | 145.5      | 253.7      | 132.6       | 170.3       | 184.4       | 176.5       | 180.3   | 70.3    | 113.7   | 98.1     | 136.4    | 101.2    | 73.6     | 176.5         | 101.2      | 0.6         |
| 221524_s_at  | RRAGD                             | 1.02E-03 | 3267.7     | 2655.0     | 3453.1     | 2819.2      | 2814.1      | 2450.1      | 2491.3      | 2555.0  | 2089.6  | 2300.3  | 1782.8   | 1884.1   | 1907.9   | 1726.2   | 2814.1        | 1907.9     | 0.7         |
| 221523_s_at  | RRAGD                             | 1.06E-03 | 922.9      | 962.3      | 1171.0     | 977.4       | 998.3       | 981.9       | 915.9       | 832.2   | 625.8   | 583.9   | 663.5    | 527.6    | 542.2    | 434.8    | 977.4         | 583.9      | 0.6         |
| 203704_s_at  | RREB1                             | 2.00E-03 | 2113.9     | 2280.1     | 2281.9     | 2560.8      | 2480.1      | 2824.5      | 2443.5      | 1854.7  | 1549.8  | 1259.4  | 2121.4   | 1578.5   | 1730.6   | 1634.9   | 2443.5        | 1634.9     | 0.7         |
| 214764_at    | RRP15                             | 4.14E-03 | 61.2       | 67.1       | 67.0       | 77.9        | 88.2        | 79.8        | 97.3        | 39.7    | 45.1    | 59.0    | 65.7     | 56.1     | 59.0     | 46.3     | 77.9          | 56.1       | 0.7         |
| 209567_at    | RRS1                              | 4.85E-03 | 802.1      | 805.5      | 1089.8     | 989.3       | 940.4       | 1427.8      | 1009.5      | 785.0   | 606.4   | 549.3   | 769.9    | 607.2    | 759.2    | 665.2    | 989.3         | 665.2      | 0.7         |
| 225780_at    | RSC1A1                            | 3.10E-03 | 416.2      | 431.6      | 598.5      | 463.2       | 520.7       | 580.9       | 555.7       | 360.7   | 258.4   | 277.4   | 410.2    | 326.6    | 318.7    | 241.7    | 520.7         | 318.7      | 0.6         |
| 223713_at    | RSPH3                             | 8.22E-03 | 677.1      | 767.5      | 579.4      | 610.0       | 5           |             |             |         |         |         |          |          |          |          |               |            |             |

TRANSCRIPTION PROFILES IN ALVEOLAR MACROPHAGES

Supplementary Table S2. Continued.

| ID           | Gene Symbol          | p-value  | VW3_Saline | VW6_Saline | VW7_Saline | VW13_Saline | VW22_Saline | VW23_Saline | VW25_Saline | VW3_LPS | VW6_LPS | VW7_LPS | VW13_LPS | VW22_LPS | VW23_LPS | VW25_LPS | Median_saline | Median_LPS | Fold change |
|--------------|----------------------|----------|------------|------------|------------|-------------|-------------|-------------|-------------|---------|---------|---------|----------|----------|----------|----------|---------------|------------|-------------|
| 202598_at    | S100A13              | 6.23E-03 | 3258.1     | 3144.3     | 2587.9     | 2546.6      | 1652.1      | 2258.4      | 2766.1      | 2887.7  | 2177.1  | 1358.2  | 1689.5   | 1406.4   | 1915.3   | 1832.4   | 2587.9        | 1832.4     | 0.7         |
| 206437_at    | S1PR4                | 6.74E-03 | 154.6      | 131.4      | 184.2      | 196.8       | 126.5       | 144.0       | 132.6       | 123.4   | 115.5   | 92.1    | 116.7    | 92.1     | 122.8    | 97.2     | 144.0         | 115.5      | 0.8         |
| 205449_at    | SAC3D1               | 2.09E-03 | 1178.3     | 1488.1     | 1059.5     | 1247.3      | 1054.2      | 1170.1      | 936.0       | 1010.1  | 964.8   | 434.7   | 931.8    | 641.1    | 776.9    | 508.7    | 1170.1        | 776.9      | 0.7         |
| 201569_s_at  | SAMM50               | 5.38E-03 | 1060.9     | 1298.2     | 908.3      | 957.2       | 838.2       | 1040.1      | 874.8       | 955.6   | 629.2   | 308.3   | 698.7    | 658.3    | 665.8    | 449.1    | 957.2         | 658.3      | 0.7         |
| 201570_at    | SAMM50               | 3.37E-03 | 536.8      | 592.9      | 554.0      | 585.5       | 470.6       | 606.2       | 501.7       | 445.4   | 278.7   | 192.6   | 405.5    | 374.6    | 385.4    | 245.8    | 554.0         | 374.6      | 0.7         |
| 204900_x_at  | SAP30                | 7.22E-03 | 156.6      | 218.5      | 181.2      | 214.0       | 164.7       | 146.1       | 177.0       | 150.3   | 176.7   | 150.6   | 158.3    | 115.3    | 87.8     | 126.7    | 177.0         | 150.3      | 0.8         |
| 225509_at    | SAP30L               | 1.79E-03 | 244.8      | 300.4      | 314.0      | 333.5       | 396.4       | 362.5       | 246.1       | 217.0   | 207.7   | 161.5   | 247.2    | 225.5    | 157.1    | 124.4    | 314.0         | 207.7      | 0.7         |
| 213257_at    | SARM1 ///<br>TMEM199 | 1.06E-03 | 161.2      | 138.0      | 197.3      | 181.8       | 180.4       | 177.8       | 138.7       | 129.7   | 88.4    | 105.0   | 123.2    | 128.5    | 131.6    | 98.5     | 177.8         | 123.2      | 0.7         |
| 213435_at    | SATB2                | 6.73E-03 | 136.7      | 148.8      | 186.5      | 135.6       | 189.6       | 167.7       | 145.7       | 145.3   | 97.4    | 64.5    | 110.3    | 67.4     | 78.1     | 48.2     | 148.8         | 78.1       | 0.5         |
| 212417_at    | SCAMP1               | 2.84E-03 | 1017.7     | 1366.3     | 1994.0     | 1697.0      | 1630.2      | 2120.3      | 1694.9      | 895.2   | 1181.5  | 1184.4  | 1217.5   | 873.5    | 1233.9   | 1081.1   | 1694.9        | 1181.5     | 0.7         |
| 212416_at    | SCAMP1               | 3.75E-03 | 1315.6     | 1678.9     | 2058.6     | 1426.0      | 1668.4      | 2148.2      | 1680.5      | 1124.1  | 1429.3  | 1137.7  | 1169.0   | 1085.6   | 1355.4   | 1138.2   | 1678.9        | 1138.2     | 0.7         |
| 1552256_a_at | SCARB1               | 1.90E-03 | 111.5      | 120.1      | 128.6      | 139.6       | 98.1        | 179.9       | 256.2       | 69.7    | 77.3    | 68.2    | 72.0     | 100.2    | 98.2     | 122.7    | 128.6         | 77.3       | 0.6         |
| 201825_s_at  | SCCPDH               | 4.93E-03 | 2838.6     | 2842.6     | 2369.0     | 2308.4      | 2072.9      | 2396.6      | 2425.4      | 2099.4  | 2024.3  | 1889.9  | 2077.4   | 1601.4   | 2030.3   | 1676.8   | 2396.6        | 2024.3     | 0.8         |
| 201826_s_at  | SCCPDH               | 4.50E-03 | 711.5      | 957.1      | 740.2      | 735.9       | 649.9       | 721.7       | 677.6       | 603.2   | 707.9   | 588.8   | 638.7    | 479.7    | 571.5    | 452.9    | 721.7         | 588.8      | 0.8         |
| 211162_x_at  | SCD                  | 7.92E-03 | 4872.6     | 4197.2     | 3539.0     | 3469.6      | 3221.7      | 3765.1      | 4953.2      | 4279.1  | 2738.4  | 2554.5  | 2699.3   | 3008.0   | 3029.1   | 3164.9   | 3765.1        | 3008.0     | 0.8         |
| 201339_s_at  | SCP2                 | 2.38E-03 | 3033.8     | 3002.5     | 3285.0     | 3343.5      | 3005.9      | 3420.2      | 3107.4      | 2326.6  | 2646.6  | 2259.6  | 2570.0   | 2047.0   | 2495.5   | 1826.4   | 3107.4        | 2326.6     | 0.7         |
| 226693_at    | SDHALP2              | 4.28E-03 | 757.0      | 893.7      | 910.7      | 640.7       | 562.9       | 821.3       | 710.2       | 666.4   | 664.2   | 551.0   | 447.3    | 472.1    | 623.2    | 551.7    | 757.0         | 551.7      | 0.7         |
| 1552790_a_at | SEC62                | 4.09E-03 | 113.0      | 150.3      | 163.1      | 166.7       | 181.3       | 196.3       | 184.5       | 117.1   | 77.7    | 74.8    | 140.2    | 99.3     | 97.5     | 86.2     | 166.7         | 97.5       | 0.6         |
| 1552789_at   | SEC62                | 8.21E-03 | 73.1       | 73.4       | 127.9      | 140.4       | 133.2       | 136.6       | 137.2       | 80.4    | 53.6    | 62.5    | 109.8    | 76.8     | 70.6     | 55.6     | 133.2         | 70.6       | 0.5         |
| 209879_at    | SELPLG               | 4.16E-03 | 1317.7     | 1546.6     | 1284.6     | 1393.9      | 1407.7      | 1884.7      | 1352.3      | 1134.7  | 936.8   | 346.1   | 972.8    | 801.8    | 1193.2   | 628.2    | 1393.9        | 936.8      | 0.7         |
| 215113_s_at  | SENP3                | 3.84E-03 | 283.5      | 340.2      | 448.8      | 362.0       | 283.9       | 374.7       | 293.9       | 298.0   | 165.0   | 146.4   | 214.1    | 178.7    | 222.3    | 148.4    | 340.2         | 178.7      | 0.5         |
| 215114_at    | SENP3                | 2.84E-04 | 180.8      | 203.3      | 299.1      | 206.6       | 166.1       | 206.0       | 175.2       | 140.1   | 101.5   | 131.8   | 129.8    | 65.7     | 106.3    | 90.6     | 203.3         | 106.3      | 0.5         |
| 203871_at    | SENP3                | 6.86E-04 | 1084.7     | 1228.1     | 1322.2     | 971.5       | 853.4       | 1147.6      | 774.3       | 832.5   | 673.4   | 397.1   | 515.0    | 519.1    | 570.1    | 368.3    | 1084.7        | 519.1      | 0.5         |
| 217977_at    | SEPX1                | 7.91E-03 | 379.3      | 378.6      | 427.0      | 467.2       | 394.0       | 436.7       | 378.9       | 354.1   | 272.2   | 194.7   | 333.9    | 338.8    | 306.8    | 241.5    | 394.0         | 306.8      | 0.8         |
| 227369_at    | SERBP1               | 4.98E-03 | 404.3      | 519.0      | 563.4      | 503.9       | 543.6       | 642.5       | 608.6       | 395.3   | 367.0   | 319.4   | 437.0    | 344.5    | 347.6    | 357.8    | 543.6         | 357.8      | 0.7         |
| 232983_s_at  | SERGEF               | 8.71E-03 | 473.9      | 445.2      | 381.8      | 397.0       | 470.7       | 392.3       | 329.0       | 429.3   | 312.0   | 260.9   | 305.5    | 369.6    | 366.1    | 248.2    | 397.0         | 312.0      | 0.8         |
| 224928_at    | SETD7                | 4.24E-04 | 883.3      | 1147.0     | 948.8      | 1030.9      | 1018.5      | 1056.4      | 911.2       | 708.1   | 696.1   | 433.6   | 688.2    | 612.2    | 554.3    | 479.1    | 1018.5        | 612.2      | 0.6         |
| 235338_s_at  | SETDB2               | 7.55E-03 | 444.5      | 396.0      | 808.5      | 562.3       | 567.4       | 537.0       | 363.7       | 460.5   | 338.6   | 551.3   | 393.6    | 390.3    | 315.4    | 225.3    | 537.0         | 390.3      | 0.7         |
| 238684_at    | SETDB2               | 1.31E-03 | 300.0      | 215.8      | 482.6      | 328.3       | 351.4       | 319.7       | 132.2       | 224.9   | 172.3   | 215.3   | 194.3    | 175.7    | 140.1    | 92.0     | 319.7         | 175.7      | 0.5         |
| 203818_s_at  | SF3A3                | 3.07E-03 | 543.7      | 606.1      | 495.9      | 450.4       | 513.1       | 538.0       | 452.1       | 450.3   | 407.1   | 256.5   | 345.5    | 398.6    | 391.4    | 340.5    | 513.1         | 391.4      | 0.8         |
| 227210_at    | SFMBT2               | 7.88E-03 | 193.5      | 101.5      | 213.3      | 214.5       | 147.4       | 131.0       | 209.7       | 197.9   | 92.0    | 87.3    | 121.7    | 98.2     | 72.1     | 105.8    | 193.5         | 98.2       | 0.5         |
| 212176_at    | SFRS18               | 9.33E-03 | 428.2      | 557.1      | 674.8      | 520.8       | 511.7       | 537.6       | 417.9       | 360.0   | 455.9   | 437.4   | 488.2    | 349.3    | 336.2    | 355.6    | 520.8         | 360.0      | 0.7         |
| 212179_at    | SFRS18               | 3.37E-03 | 386.7      | 532.8      | 785.1      | 715.7       | 592.2       | 771.0       | 703.2       | 369.4   | 371.2   | 381.8   | 523.9    | 405.8    | 355.0    | 374.3    | 703.2         | 374.3      | 0.5         |
| 225336_at    | SFRS2IP              | 2.31E-03 | 1689.1     | 2096.2     | 1607.1     | 2597.8      | 2367.5      | 2675.6      | 2282.9      | 1579.5  | 1604.6  | 1062.7  | 1889.7   | 1618.7   | 1726.7   | 1497.9   | 2282.9        | 1604.6     | 0.7         |
| 217226_s_at  | SFXN3                | 7.20E-03 | 693.1      | 749.7      | 567.0      | 726.9       | 587.0       | 710.9       | 573.5       | 595.2   | 423.7   | 387.8   | 531.4    | 510.3    | 582.4    | 460.7    | 693.1         | 510.3      | 0.7         |
| 226373_at    | SFXN5                | 7.32E-03 | 176.4      | 133.5      | 165.1      | 170.0       | 144.1       | 210.4       | 151.6       | 136.1   | 91.6    | 111.8   | 144.6    | 142.3    | 151.5    | 109.9    | 165.1         | 136.1      | 0.8         |
| 243141_at    | SGMS2                | 8.35E-03 | 530.0      | 649.2      | 448.9      | 512.8       | 580.1       | 744.6       | 568.6       | 501.8   | 409.6   | 327.8   | 506.4    | 360.4    | 437.7    | 343.6    | 568.6         | 409.6      | 0.7         |
| 222258_s_at  | SH3BP4               | 1.06E-03 | 347.9      | 430.5      | 264.4      | 525.0       | 278.3       | 368.2       | 247.0       | 350.8   | 183.6   | 98.8    | 263.0    | 145.5    | 169.5    | 113.9    | 347.9         | 169.5      | 0.5         |
| 201810_s_at  | SH3BP5               | 9.56E-03 | 845.7      | 914.6      | 979.4      | 1064.7      | 1024.3      | 1009.9      | 1294.2      | 678.4   | 736.8   | 897.0   | 776.6    | 674.8    | 902.1    | 999.8    | 1009.9        | 776.6      | 0.8         |
| 213252_at    | SH3PXD2A             | 6.31E-03 | 150.3      | 112.6      | 134.2      | 110.2       | 105.7       | 112.4       | 107.8       | 116.3   | 88.9    | 79.9    | 89.2     | 81.6     | 90.3     | 94.8     | 112.4         | 89.2       | 0.8         |
| 224817_at    | SH3PXD2A             | 3.82E-03 | 157.8      | 123.2      | 243.2      | 268.0       | 208.5       | 230.9       | 192.8       | 159.9   | 95.7    | 113.8   | 175.1    | 111.9    | 109.7    | 82.5     | 208.5         | 111.9      | 0.5         |
| 230459_s_at  | SHB                  | 1.69E-03 | 132.7      | 96.8       | 135.2      | 95.9        | 91.3        | 104.0       | 89.5        | 90.1    | 82.2    | 44.2    | 50.2     | 56.2     | 58.6     | 44.2     | 96.8          | 56.2       | 0.6         |
| 204656_at    | SHB                  | 1.35E-03 | 257.1      | 222.5      | 234.6      | 171.9       | 182.0       | 206.7       | 160.3       | 183.1   | 154.8   | 86.4    | 118.5    | 124.2    | 118.7    | 93.5     | 206.7         | 118.7      | 0.6         |
| 204657_s_at  | SHB                  | 4.37E-04 | 206.6      | 126.4      | 220.4      | 157.8       | 145.9       | 176.9       | 129.1       | 142.8   | 82.0    | 89.1    | 89.5     | 99.3     | 112.1    | 68.5     | 157.8         | 89.5       | 0.6         |
| 1557458_s_at | SHB                  | 3.29E-03 | 265.7      | 272.8      | 478.2      | 307.9       | 312.6       | 310.4       | 319.4       | 271.1   | 139.2   | 101.4   | 127.0    | 129.2    | 154.8    | 60.8     | 310.4         | 129.2      | 0.4         |
| 224954_at    | SHMT1                | 2.18E-03 | 386.9      | 440.8      | 390.1      | 385.4       | 301.1       | 403.5       | 284.2       | 267.4   | 255.8   | 112.4   | 231.0    | 234.1    | 235.9    | 151.2    | 386.9         | 234.1      | 0.6         |
| 225056_at    | SIPA1L2              | 5.24E-03 | 1099.5     | 1831.4     | 1452.5     | 1901.0      | 1575.8      | 1063.1      | 1269.5      | 966.1   | 1482.1  | 997.6   | 1339.8   | 1167.0   | 902.4    | 1026.4   | 1452.5        | 1026.4     | 0.7         |
| 37831_at     | SIPA1L3              | 8.76E-03 | 100.3      | 97.2       | 111.7      | 108.5       | 116.3       | 106.9       | 97.5        | 92.3    | 69.1    | 77.2    | 93.0     | 82.7     | 94.2     | 74.8     | 106.9         | 82.7       | 0.8         |
| 206934_at    | SIRPB1               | 1.28E-03 | 2144.2     | 2201.6     | 1403.0     | 2334.5      | 2088.9      | 1615.2      | 651.8       | 1738.0  | 1419.9  | 656.8   | 1532.2   | 1415.1   | 965.6    | 496.3    | 2088.9        | 1415.1     | 0.7         |
| 1559034_at   | SIRPB2               | 4.54E-03 | 238.9      | 370.6      | 403.9      | 306.7       | 423.8       | 396.1       | 378.1       | 242.0   | 137.2   | 138.5   | 193.1    | 307.7    | 225.4    | 184.9    | 378.1         | 193.1      | 0.5         |
| 221562_s_at  | SIRT3                | 5.10E-03 | 94.0       | 102.6      | 108.2      | 117.7       | 115.3       | 115.2       | 91.9        | 78.9    | 84.5    | 75.3    | 91.6     | 101.2    | 88.5     | 62.3     | 108.2         | 84.5       | 0.8         |
| 219185_at    | SIRT5                | 3.37E-03 | 221.9      | 188.0      | 252.6      | 211.7       | 243.7       | 262.0       | 183.4       | 213.4   | 147.7   | 129.5   | 134.4    | 174.2    | 160.7    | 102.7    | 221.9         | 147.7      | 0.7         |
| 229112_at    | SIRT5                | 6.25E-04 | 165.3      | 150.6      | 143.4      | 134.9       | 147.4       | 168.4       | 124.3       | 132.8   | 109.7   | 97.8    | 93.3     | 91.4     | 109.6    | 89.3     | 147.4         | 97.8       | 0.7         |
| 204270_at    | SKI                  | 7.87E-05 | 369.1      | 400.4      | 314.8      | 539.0       | 451.3       | 537.9       | 385.5       | 263.4   | 221.5   | 165.5   | 337.5    | 243.0    | 282.5    | 204.0    | 400.4         | 243.0      | 0.6         |
| 203625_x_at  | SKP2                 | 4.58E-03 | 708.0      | 926.1      | 902.1      | 795.7       | 743.1       | 848.1       | 736.2       | 599.0   | 666.7   | 480.9   | 667.4    | 628.1    | 527.0    | 481.2    | 795.7         | 599.0      | 0.8         |
| 203761_at    | SLA                  | 9.99E-03 | 2063.8     | 2523.6     | 2640.9     | 2820.2      | 2453.3      | 3113.8      | 2847.1      | 2062.7  | 2047.0  | 1226.8  | 2352.5   | 1698.4   | 1857.1   | 1403.3   | 2640.9        | 1857.1     | 0.7         |
| 203760_s_at  | SLA                  | 5.71E-03 | 1784.7     | 1963.8     | 1597.0     | 2039.0      | 1360.1      | 1867.2      | 1815.3      | 1488.2  | 1188.4  | 651.0   | 1486.7   | 1203.2   | 1330.0   | 923.9    | 1815.3        | 1203.2     | 0.7         |
| 210422_x_at  | SLC11A1              | 9.38E-03 | 4680.1     | 5853.4     | 5103.5     | 5419.6      | 4890.4      | 5069.3      | 5679.2      | 3902.6  | 4409.1  | 2630.5  | 3663.2</ |          |          |          |               |            |             |

Supplementary Table S2. Continued.

| ID           | Gene Symbol   | p-value  | VW3_Saline | VW6_Saline | VW7_Saline | VW13_Saline | VW22_Saline | VW23_Saline | VW25_Saline | VW3_LPS | VW6_LPS | VW7_LPS | VW13_LPS | VW22_LPS | VW23_LPS | VW25_LPS | Median_saline | Median_LPS | Fold change |
|--------------|---------------|----------|------------|------------|------------|-------------|-------------|-------------|-------------|---------|---------|---------|----------|----------|----------|----------|---------------|------------|-------------|
| 229639_s_at  | SLC19A1       | 2.93E-03 | 151.9      | 127.3      | 126.9      | 145.0       | 131.5       | 156.9       | 114.2       | 131.6   | 86.1    | 99.6    | 92.3     | 109.0    | 114.4    | 82.5     | 131.5         | 99.6       | 0.8         |
| 1555952_at   | SLC19A1       | 2.99E-03 | 57.7       | 66.7       | 76.7       | 88.9        | 88.6        | 106.2       | 82.8        | 55.3    | 41.4    | 41.0    | 69.0     | 62.6     | 53.5     | 47.0     | 82.8          | 53.5       | 0.6         |
| 1555953_at   | SLC19A1       | 3.58E-03 | 124.4      | 161.1      | 122.7      | 136.3       | 137.0       | 133.7       | 91.8        | 92.8    | 72.4    | 45.2    | 84.4     | 92.4     | 59.2     | 85.4     | 133.7         | 84.4       | 0.6         |
| 209777_s_at  | SLC19A1       | 3.76E-03 | 162.5      | 179.4      | 165.0      | 153.9       | 119.4       | 137.6       | 137.8       | 138.5   | 115.6   | 76.0    | 129.3    | 89.6     | 90.9     | 73.5     | 153.9         | 90.9       | 0.6         |
| 220736_at    | SLC19A3       | 1.43E-03 | 1203.4     | 1105.9     | 1876.0     | 1458.2      | 1483.4      | 2017.4      | 1021.1      | 987.0   | 763.4   | 430.1   | 677.2    | 490.9    | 594.0    | 396.7    | 1458.2        | 594.0      | 0.4         |
| 239345_at    | SLC19A3       | 5.01E-03 | 313.4      | 365.3      | 754.3      | 650.1       | 651.7       | 940.8       | 439.4       | 395.3   | 247.5   | 191.0   | 271.1    | 214.9    | 289.9    | 167.7    | 650.1         | 247.5      | 0.4         |
| 208916_at    | SLC1A5        | 8.84E-03 | 139.6      | 100.9      | 147.4      | 207.1       | 104.6       | 139.2       | 151.2       | 121.5   | 50.2    | 83.7    | 117.7    | 90.3     | 133.3    | 94.1     | 139.6         | 94.1       | 0.7         |
| 243969_at    | SLC24A4       | 8.39E-03 | 167.1      | 242.8      | 537.8      | 387.9       | 548.1       | 968.1       | 383.9       | 207.4   | 140.3   | 98.5    | 254.4    | 220.0    | 272.4    | 81.5     | 387.9         | 207.4      | 0.5         |
| 203658_at    | SLC25A20      | 7.07E-03 | 431.9      | 700.7      | 515.1      | 570.2       | 456.8       | 557.0       | 411.7       | 420.0   | 396.4   | 196.1   | 442.7    | 356.6    | 351.9    | 203.7    | 515.1         | 356.6      | 0.7         |
| 228836_at    | SLC25A35      | 4.69E-03 | 76.4       | 64.9       | 83.8       | 85.9        | 94.5        | 76.5        | 63.9        | 71.7    | 56.3    | 37.9    | 56.5     | 58.3     | 48.4     | 37.9     | 76.5          | 56.3       | 0.7         |
| 201919_at    | SLC25A36      | 2.46E-03 | 291.7      | 360.2      | 425.7      | 402.7       | 421.1       | 459.0       | 412.9       | 241.4   | 268.3   | 318.3   | 308.8    | 272.7    | 227.4    | 224.3    | 412.9         | 268.3      | 0.6         |
| 1563498_s_at | SLC25A45      | 9.03E-03 | 53.7       | 74.3       | 82.0       | 74.5        | 93.0        | 96.0        | 63.3        | 58.4    | 41.9    | 34.1    | 70.7     | 43.6     | 41.3     | 36.1     | 74.5          | 41.9       | 0.6         |
| 226679_at    | SLC26A11      | 6.58E-04 | 917.7      | 540.1      | 801.6      | 576.5       | 715.3       | 423.9       | 649.8       | 567.5   | 318.1   | 497.5   | 262.3    | 554.6    | 315.2    | 338.9    | 649.8         | 338.9      | 0.5         |
| 226728_at    | SLC27A1       | 7.75E-03 | 121.1      | 104.8      | 135.0      | 143.1       | 117.7       | 116.1       | 127.4       | 103.6   | 84.5    | 63.3    | 82.3     | 102.5    | 91.6     | 79.6     | 121.1         | 84.5       | 0.7         |
| 201802_at    | SLC29A1       | 3.43E-03 | 748.7      | 864.4      | 1304.0     | 979.0       | 762.9       | 1311.7      | 897.5       | 529.9   | 506.7   | 396.9   | 640.1    | 651.6    | 794.1    | 389.0    | 897.5         | 529.9      | 0.6         |
| 219344_at    | SLC29A3       | 8.28E-03 | 513.1      | 410.0      | 568.9      | 533.2       | 419.6       | 408.0       | 495.7       | 439.8   | 234.0   | 145.6   | 311.1    | 356.6    | 260.2    | 148.1    | 495.7         | 260.2      | 0.5         |
| 239426_at    | SLC2A8        | 7.82E-03 | 44.4       | 35.7       | 50.5       | 99.5        | 78.9        | 59.3        | 69.7        | 38.4    | 26.3    | 43.1    | 82.4     | 56.7     | 51.2     | 44.4     | 59.3          | 44.4       | 0.7         |
| 232678_at    | SLC2A9        | 6.14E-03 | 66.8       | 58.5       | 53.8       | 72.5        | 72.2        | 65.7        | 65.4        | 51.8    | 55.3    | 36.0    | 54.8     | 45.7     | 53.8     | 51.1     | 65.7          | 51.8       | 0.8         |
| 226894_at    | SLC35A3       | 7.25E-03 | 130.0      | 172.1      | 284.9      | 230.6       | 242.3       | 260.2       | 288.8       | 137.4   | 116.9   | 154.9   | 187.7    | 156.1    | 118.3    | 127.2    | 242.3         | 137.4      | 0.6         |
| 222647_at    | SLC35C1       | 5.99E-03 | 306.5      | 285.3      | 387.5      | 384.9       | 363.5       | 375.3       | 307.6       | 291.8   | 194.5   | 225.5   | 265.6    | 307.1    | 294.5    | 217.4    | 363.5         | 265.6      | 0.7         |
| 202830_s_at  | SLC37A4       | 9.78E-03 | 132.7      | 115.6      | 159.2      | 154.4       | 142.5       | 134.9       | 127.1       | 124.6   | 92.4    | 90.9    | 128.2    | 118.3    | 94.1     | 94.1     | 134.9         | 94.1       | 0.7         |
| 227046_at    | SLC39A11      | 4.39E-03 | 1141.8     | 1478.5     | 1486.0     | 1445.9      | 1505.7      | 1369.6      | 1577.1      | 1205.0  | 852.8   | 658.1   | 1083.8   | 929.5    | 700.3    | 640.0    | 1478.5        | 852.8      | 0.6         |
| 224609_at    | SLC44A2       | 8.56E-03 | 250.0      | 263.3      | 255.1      | 303.2       | 217.4       | 257.9       | 166.2       | 215.9   | 150.5   | 123.4   | 196.2    | 226.5    | 188.4    | 97.3     | 255.1         | 188.4      | 0.7         |
| 225175_s_at  | SLC44A2       | 6.42E-04 | 592.9      | 556.7      | 570.6      | 726.4       | 498.7       | 571.7       | 321.5       | 459.9   | 343.0   | 250.5   | 415.5    | 366.1    | 339.9    | 161.7    | 570.6         | 343.0      | 0.6         |
| 225598_at    | SLC45A4       | 2.36E-03 | 528.6      | 665.3      | 496.9      | 376.0       | 496.0       | 561.0       | 468.8       | 471.2   | 299.0   | 155.4   | 252.1    | 329.7    | 287.2    | 178.7    | 496.9         | 287.2      | 0.6         |
| 1552278_a_at | SLC46A1       | 8.59E-04 | 65.5       | 79.5       | 80.6       | 62.2        | 71.5        | 72.7        | 50.6        | 49.0    | 48.9    | 44.5    | 37.1     | 61.5     | 46.8     | 28.5     | 71.5          | 46.8       | 0.7         |
| 1558703_at   | SLC46A1       | 8.22E-04 | 310.6      | 384.2      | 267.7      | 271.4       | 251.0       | 257.4       | 150.4       | 165.1   | 151.5   | 75.6    | 116.5    | 229.1    | 101.5    | 70.7     | 267.7         | 116.5      | 0.4         |
| 214719_at    | SLC46A3       | 1.79E-03 | 545.7      | 661.6      | 801.4      | 702.9       | 751.6       | 715.0       | 484.5       | 468.4   | 351.3   | 192.9   | 383.5    | 450.2    | 267.0    | 166.2    | 702.9         | 351.3      | 0.5         |
| 219525_at    | SLC47A1       | 4.65E-03 | 1320.8     | 1308.2     | 1518.5     | 1838.8      | 1608.3      | 1747.1      | 1907.3      | 1357.7  | 913.4   | 563.3   | 1159.1   | 998.5    | 760.5    | 679.5    | 1608.3        | 913.4      | 0.6         |
| 223748_at    | SLC4A11       | 7.40E-03 | 302.6      | 396.7      | 442.9      | 351.2       | 365.1       | 263.2       | 284.5       | 294.6   | 323.3   | 158.3   | 240.0    | 254.3    | 116.3    | 133.1    | 351.2         | 240.0      | 0.7         |
| 1554113_a_at | SLC4A8        | 2.90E-03 | 170.0      | 235.6      | 190.5      | 159.0       | 171.4       | 269.6       | 181.7       | 147.1   | 171.1   | 60.6    | 116.2    | 99.2     | 150.4    | 110.1    | 181.7         | 116.2      | 0.6         |
| 232057_at    | SLC7A6OS      | 5.54E-03 | 759.8      | 858.1      | 958.6      | 910.4       | 748.2       | 929.9       | 735.4       | 707.9   | 700.0   | 688.8   | 730.6    | 564.6    | 688.2    | 554.8    | 858.1         | 688.8      | 0.8         |
| 229153_at    | SLC7A6OS      | 7.59E-03 | 175.2      | 156.1      | 230.2      | 208.1       | 220.3       | 194.8       | 163.3       | 180.1   | 107.1   | 146.9   | 177.3    | 154.4    | 140.4    | 108.8    | 194.8         | 146.9      | 0.8         |
| 216092_s_at  | SLC7A8        | 1.57E-03 | 716.0      | 1646.0     | 1042.4     | 682.9       | 839.3       | 999.9       | 1064.0      | 625.7   | 885.9   | 387.5   | 400.2    | 555.1    | 474.3    | 351.3    | 999.9         | 474.3      | 0.5         |
| 216603_at    | SLC7A8        | 1.09E-03 | 511.3      | 1151.0     | 911.2      | 467.8       | 543.5       | 709.9       | 874.4       | 335.9   | 520.2   | 199.0   | 259.4    | 348.1    | 331.0    | 267.3    | 709.9         | 331.0      | 0.5         |
| 217248_s_at  | SLC7A8        | 3.66E-03 | 374.7      | 671.2      | 665.2      | 403.1       | 375.5       | 547.5       | 655.6       | 306.7   | 241.1   | 152.9   | 205.7    | 324.3    | 266.2    | 199.4    | 547.5         | 241.1      | 0.4         |
| 202752_x_at  | SLC7A8        | 2.44E-03 | 380.2      | 933.0      | 625.1      | 380.5       | 478.6       | 577.8       | 627.7       | 369.7   | 427.7   | 199.0   | 243.5    | 303.8    | 252.4    | 239.5    | 577.8         | 252.4      | 0.4         |
| 216604_s_at  | SLC7A8        | 5.76E-04 | 1293.3     | 2893.4     | 2024.0     | 1080.9      | 1202.4      | 1843.2      | 2149.5      | 780.6   | 1605.5  | 515.6   | 589.7    | 698.6    | 691.5    | 601.1    | 1843.2        | 691.5      | 0.4         |
| 209453_at    | SLC9A1        | 3.37E-03 | 320.9      | 354.0      | 407.5      | 388.3       | 336.2       | 406.0       | 369.2       | 315.5   | 198.5   | 176.1   | 272.1    | 233.1    | 255.9    | 173.2    | 369.2         | 233.1      | 0.6         |
| 203909_at    | SLC9A6        | 4.01E-03 | 1264.7     | 1523.2     | 1560.1     | 1590.2      | 1602.1      | 1825.4      | 1377.2      | 1170.7  | 1155.6  | 941.6   | 1298.9   | 1131.5   | 1187.4   | 1015.4   | 1560.1        | 1155.6     | 0.7         |
| 211557_x_at  | SLCO2B1       | 5.81E-03 | 421.5      | 396.2      | 464.8      | 451.8       | 326.0       | 354.2       | 420.3       | 316.9   | 236.6   | 157.8   | 284.2    | 278.4    | 270.2    | 154.0    | 420.3         | 270.2      | 0.6         |
| 203472_s_at  | SLCO2B1       | 3.66E-03 | 512.8      | 497.6      | 558.8      | 598.4       | 393.6       | 447.0       | 454.5       | 394.1   | 266.8   | 177.2   | 310.5    | 318.5    | 338.8    | 181.8    | 497.6         | 310.5      | 0.6         |
| 203473_at    | SLCO2B1       | 2.29E-03 | 2730.3     | 3126.8     | 2821.1     | 2933.8      | 2615.6      | 2786.7      | 2534.7      | 2263.9  | 1996.6  | 901.4   | 1959.5   | 1565.6   | 1490.8   | 906.7    | 2786.7        | 1565.6     | 0.6         |
| 226743_at    | SLFN11        | 1.48E-03 | 2840.4     | 3041.7     | 2946.3     | 2567.5      | 2674.4      | 2463.2      | 2315.2      | 2176.4  | 2236.6  | 1798.9  | 1993.2   | 1430.0   | 1671.8   | 1776.4   | 2674.4        | 1798.9     | 0.7         |
| 206565_x_at  | SMA4          | 6.74E-03 | 1067.3     | 886.7      | 1144.8     | 992.7       | 1124.2      | 891.4       | 757.4       | 926.4   | 562.3   | 673.7   | 760.4    | 1036.3   | 692.3    | 552.3    | 992.7         | 692.3      | 0.7         |
| 215043_s_at  | SMA4 /// SMA5 | 3.93E-03 | 603.6      | 480.3      | 816.2      | 665.3       | 712.3       | 549.9       | 435.5       | 560.4   | 255.3   | 353.2   | 393.9    | 540.2    | 385.5    | 308.3    | 603.6         | 385.5      | 0.6         |
| 235598_at    | SMAD2         | 4.81E-03 | 705.8      | 741.0      | 857.4      | 789.7       | 824.7       | 947.1       | 877.2       | 616.7   | 596.3   | 625.4   | 659.6    | 535.0    | 619.1    | 710.4    | 824.7         | 619.1      | 0.8         |
| 235725_at    | SMAD4         | 2.73E-03 | 519.4      | 608.6      | 571.3      | 545.9       | 566.0       | 610.7       | 577.5       | 424.3   | 435.8   | 386.6   | 466.9    | 387.8    | 490.0    | 432.8    | 571.3         | 432.8      | 0.8         |
| 207069_s_at  | SMAD6         | 3.90E-03 | 145.4      | 197.3      | 150.1      | 189.6       | 159.8       | 165.2       | 195.9       | 152.3   | 103.8   | 68.7    | 127.6    | 106.9    | 99.2     | 127.2    | 165.2         | 106.9      | 0.6         |
| 212257_s_at  | SMARCA2       | 3.16E-03 | 518.5      | 487.2      | 516.2      | 539.4       | 566.5       | 561.6       | 439.7       | 455.1   | 308.2   | 267.4   | 405.2    | 434.5    | 421.3    | 233.1    | 518.5         | 405.2      | 0.8         |
| 206544_x_at  | SMARCA2       | 4.55E-03 | 496.0      | 572.9      | 801.1      | 768.1       | 609.6       | 804.0       | 601.9       | 509.3   | 421.4   | 364.4   | 540.4    | 391.1    | 439.0    | 300.9    | 609.6         | 421.4      | 0.7         |
| 206542_s_at  | SMARCA2       | 2.88E-03 | 808.1      | 859.8      | 1100.4     | 1007.3      | 1013.3      | 1176.5      | 834.2       | 622.1   | 732.6   | 483.2   | 806.1    | 508.1    | 595.1    | 489.7    | 1007.3        | 595.1      | 0.6         |
| 223197_s_at  | SMARCAD1      | 9.29E-03 | 398.9      | 389.6      | 401.9      | 412.0       | 423.0       | 429.4       | 398.0       | 375.2   | 315.9   | 319.8   | 365.9    | 302.5    | 302.1    | 282.5    | 401.9         | 315.9      | 0.8         |
| 211988_at    | SMARCE1       | 8.31E-03 | 721.6      | 782.2      | 1086.2     | 1024.8      | 1086.1      | 870.4       | 819.0       | 652.2   | 674.3   | 858.1   | 884.3    | 757.5    | 592.7    | 614.8    | 870.4         | 674.3      | 0.8         |
| 204240_s_at  | SMC2          | 2.52E-03 | 99.7       | 130.2      | 176.1      | 141.6       | 172.1       | 141.2       | 131.6       | 97.0    | 70.9    | 80.7    | 113.5    | 82.3     | 65.1     | 69.7     | 141.2         | 80.7       | 0.6         |
| 231701_s_at  | SMCR8         | 2.51E-03 | 78.6       | 89.2       | 160.8      | 117.7       | 98.2        | 143.4       | 120.2       | 69.8    | 56.1    | 58.9    | 86.4     | 57.7     | 63.0     | 45.2     | 117.7         | 58.9       | 0.5         |
| 210465_s_at  | SNAPC3        | 7.93E-03 | 190.3      | 220.7      | 296.4      | 297.9       | 219.5       | 282.3       | 236.9       | 197.5   | 188.6   | 157.7   | 205.2    | 153.2    | 174.0    | 121.5    | 236.9         | 174.0      | 0.7         |
| 204001_at    | SNAPC3        | 2.02E-03 | 254.3      | 369.2      | 321.5      | 364.6       | 302.6       | 319.4       | 296.0       | 245.5   | 254.3   | 180.3   | 239.9    | 211.6    | 201.9    | 171.2    | 319.4         | 211.6      | 0.7         |
| 223773_s_at  | SN            |          |            |            |            |             |             |             |             |         |         |         |          |          |          |          |               |            |             |

TRANSCRIPTION PROFILES IN ALVEOLAR MACROPHAGES

Supplementary Table S2. Continued.

| ID           | Gene Symbol          | p-value  | VW3_Saline | VW6_Saline | VW7_Saline | VW13_Saline | VW22_Saline | VW23_Saline | VW25_Saline | VW3_LPS | VW6_LPS | VW7_LPS | VW13_LPS | VW22_LPS | VW23_LPS | VW25_LPS | Median_saline | Median_LPS | Fold change |
|--------------|----------------------|----------|------------|------------|------------|-------------|-------------|-------------|-------------|---------|---------|---------|----------|----------|----------|----------|---------------|------------|-------------|
| 1553961_s_at | SNX21                | 9.47E-03 | 133.4      | 161.9      | 169.7      | 153.4       | 182.7       | 157.9       | 136.0       | 110.3   | 116.2   | 43.4    | 112.6    | 130.7    | 93.5     | 74.3     | 157.9         | 110.3      | 0.7         |
| 222716_s_at  | SNX24                | 3.46E-03 | 352.0      | 307.6      | 326.3      | 330.2       | 264.5       | 284.0       | 273.4       | 259.6   | 187.1   | 194.0   | 275.9    | 224.0    | 232.0    | 165.2    | 307.6         | 224.0      | 0.7         |
| 225624_at    | SNX29                | 6.78E-03 | 138.2      | 119.9      | 128.5      | 192.0       | 174.1       | 153.0       | 144.6       | 130.1   | 82.9    | 83.2    | 135.3    | 145.0    | 100.2    | 62.6     | 144.6         | 100.2      | 0.7         |
| 226249_at    | SNX30                | 5.14E-03 | 312.3      | 390.7      | 436.0      | 498.0       | 523.1       | 483.7       | 447.1       | 302.5   | 262.0   | 232.8   | 447.4    | 327.8    | 262.0    | 233.2    | 447.1         | 262.0      | 0.6         |
| 222417_s_at  | SNX5                 | 2.77E-03 | 2297.7     | 2458.6     | 2887.6     | 2554.2      | 2470.9      | 2925.0      | 2471.1      | 2172.1  | 1433.4  | 1111.7  | 1746.6   | 1716.1   | 1625.6   | 1229.6   | 2471.1        | 1625.6     | 0.7         |
| 217792_at    | SNX5                 | 9.35E-03 | 581.3      | 742.6      | 928.7      | 781.9       | 847.0       | 910.2       | 807.2       | 694.4   | 493.9   | 346.1   | 512.9    | 564.8    | 492.5    | 374.3    | 807.2         | 493.9      | 0.6         |
| 229980_s_at  | SNX5                 | 1.06E-03 | 2285.1     | 2552.2     | 3723.6     | 3207.8      | 2981.0      | 3927.6      | 3463.3      | 1819.2  | 1958.8  | 1754.9  | 2113.1   | 1726.9   | 1955.0   | 1538.0   | 3207.8        | 1819.2     | 0.6         |
| 203372_s_at  | SOCS2                | 5.88E-03 | 100.6      | 133.9      | 140.0      | 165.9       | 120.1       | 188.1       | 109.3       | 126.3   | 67.2    | 74.3    | 104.7    | 63.1     | 83.3     | 61.8     | 133.9         | 74.3       | 0.6         |
| 222513_s_at  | SORBS1               | 9.63E-03 | 91.3       | 108.6      | 71.6       | 65.0        | 71.3        | 62.8        | 67.3        | 81.8    | 85.7    | 56.7    | 46.9     | 54.7     | 45.3     | 63.0     | 71.3          | 56.7       | 0.8         |
| 201562_s_at  | SORD                 | 1.45E-03 | 266.5      | 300.8      | 345.0      | 322.8       | 298.9       | 289.0       | 300.5       | 196.9   | 238.1   | 175.1   | 239.9    | 181.8    | 168.4    | 129.8    | 300.5         | 181.8      | 0.6         |
| 201563_at    | SORD                 | 1.69E-03 | 322.0      | 365.2      | 542.2      | 523.0       | 478.6       | 453.0       | 396.6       | 298.0   | 254.5   | 244.1   | 315.8    | 272.0    | 180.1    | 199.3    | 453.0         | 254.5      | 0.6         |
| 212797_at    | SORT1                | 1.86E-03 | 409.6      | 366.9      | 514.2      | 449.4       | 431.2       | 558.1       | 572.8       | 354.2   | 287.4   | 348.9   | 334.5    | 250.1    | 335.6    | 312.0    | 449.4         | 334.5      | 0.7         |
| 224818_at    | SORT1                | 1.10E-03 | 2877.0     | 2732.4     | 2797.1     | 2609.7      | 2730.5      | 3142.1      | 2688.7      | 2523.2  | 1708.5  | 1500.2  | 1807.6   | 1653.8   | 2025.1   | 1932.4   | 2732.4        | 1807.6     | 0.7         |
| 204432_at    | SOX12                | 6.86E-03 | 117.3      | 142.7      | 98.6       | 85.8        | 75.6        | 93.2        | 71.4        | 104.4   | 86.0    | 48.9    | 41.0     | 62.1     | 65.8     | 61.0     | 93.2          | 62.1       | 0.7         |
| 209736_at    | SOX13                | 8.83E-03 | 75.6       | 66.5       | 93.0       | 84.8        | 91.7        | 86.3        | 77.6        | 78.3    | 50.8    | 54.4    | 58.0     | 46.8     | 64.8     | 59.4     | 84.8          | 58.0       | 0.7         |
| 201417_at    | SOX4                 | 1.53E-03 | 982.3      | 982.0      | 1273.3     | 1204.0      | 1119.6      | 832.4       | 907.9       | 788.2   | 549.7   | 621.8   | 781.2    | 655.7    | 585.0    | 314.6    | 982.3         | 621.8      | 0.6         |
| 201416_at    | SOX4                 | 7.80E-03 | 470.4      | 590.5      | 599.9      | 528.7       | 512.7       | 420.6       | 441.3       | 521.2   | 281.4   | 243.7   | 369.6    | 318.6    | 287.8    | 146.3    | 512.7         | 287.8      | 0.6         |
| 224754_at    | SP1                  | 8.91E-03 | 852.5      | 876.4      | 942.8      | 1037.5      | 1050.7      | 1083.6      | 1009.2      | 797.0   | 740.4   | 754.5   | 883.1    | 752.0    | 752.5    | 744.4    | 1009.2        | 752.5      | 0.7         |
| 200665_s_at  | SPARC                | 6.89E-03 | 2063.6     | 2163.8     | 5589.0     | 4542.2      | 3279.0      | 4379.6      | 4130.1      | 2004.3  | 1377.5  | 2492.0  | 3339.0   | 2813.6   | 2085.9   | 1808.2   | 4130.1        | 2085.9     | 0.5         |
| 237807_at    | SPATA12              | 8.34E-03 | 149.1      | 130.8      | 109.1      | 119.6       | 106.1       | 105.2       | 109.7       | 140.7   | 77.3    | 45.5    | 80.6     | 104.9    | 59.5     | 53.9     | 109.7         | 77.3       | 0.7         |
| 211704_s_at  | SPIN2A ///<br>SPIN2B | 5.68E-03 | 341.9      | 492.3      | 420.7      | 445.3       | 376.7       | 419.9       | 297.7       | 354.7   | 274.7   | 264.8   | 334.0    | 252.6    | 301.6    | 214.2    | 419.9         | 274.7      | 0.7         |
| 228654_at    | SPIN4                | 9.31E-03 | 78.3       | 76.2       | 119.5      | 141.9       | 117.5       | 106.0       | 149.2       | 82.8    | 70.8    | 61.7    | 93.3     | 48.6     | 44.0     | 53.2     | 117.5         | 61.7       | 0.5         |
| 202826_at    | SPINT1               | 7.87E-03 | 220.0      | 159.4      | 179.2      | 198.3       | 179.6       | 146.8       | 150.1       | 161.9   | 107.6   | 63.3    | 99.0     | 176.3    | 112.4    | 86.1     | 179.2         | 107.6      | 0.6         |
| 1569723_a_at | SPIRE2               | 4.16E-04 | 264.1      | 118.5      | 144.8      | 182.4       | 134.9       | 232.3       | 139.8       | 222.4   | 73.1    | 73.5    | 91.9     | 83.1     | 118.0    | 65.8     | 144.8         | 83.1       | 0.6         |
| 1568916_at   | SPIRE2               | 4.03E-03 | 164.7      | 191.0      | 262.9      | 181.7       | 209.5       | 275.5       | 204.7       | 163.0   | 108.5   | 101.4   | 149.8    | 116.4    | 139.7    | 86.0     | 204.7         | 116.4      | 0.6         |
| 243594_x_at  | SPIRE2               | 1.39E-03 | 269.3      | 294.5      | 422.3      | 367.2       | 277.6       | 542.4       | 370.5       | 217.3   | 167.3   | 142.3   | 252.5    | 165.0    | 322.0    | 175.7    | 367.2         | 175.7      | 0.5         |
| 1568964_x_at | SPN                  | 2.65E-03 | 643.4      | 713.4      | 522.3      | 625.7       | 434.3       | 497.4       | 459.9       | 517.4   | 415.5   | 229.7   | 440.1    | 317.0    | 403.6    | 260.1    | 522.3         | 403.6      | 0.8         |
| 216981_x_at  | SPN                  | 1.96E-03 | 2659.6     | 2189.2     | 2143.3     | 2361.1      | 1878.5      | 2064.0      | 1910.5      | 1885.1  | 1576.5  | 1388.0  | 1784.8   | 1483.3   | 1795.3   | 1331.7   | 2143.3        | 1576.5     | 0.7         |
| 206057_x_at  | SPN                  | 1.34E-03 | 2814.3     | 2320.4     | 2319.3     | 2568.8      | 1956.6      | 2085.3      | 2034.6      | 1897.1  | 1649.2  | 1412.4  | 1839.5   | 1383.8   | 1857.6   | 1334.7   | 2319.3        | 1649.2     | 0.7         |
| 223173_at    | SPNS1                | 1.97E-03 | 293.0      | 225.5      | 256.2      | 253.5       | 222.7       | 274.0       | 195.5       | 199.0   | 172.7   | 136.2   | 164.5    | 168.4    | 237.7    | 120.9    | 253.5         | 168.4      | 0.7         |
| 46256_at     | SPSB3                | 7.50E-03 | 790.8      | 960.6      | 1087.7     | 1016.4      | 928.6       | 967.3       | 789.7       | 700.2   | 657.3   | 585.6   | 714.5    | 824.9    | 775.8    | 595.2    | 960.6         | 700.2      | 0.7         |
| 226080_at    | SSH2                 | 5.48E-04 | 1912.3     | 1690.6     | 1680.0     | 1927.1      | 1854.4      | 1819.1      | 1337.7      | 1291.3  | 1121.0  | 665.7   | 1224.0   | 1122.7   | 1206.8   | 815.7    | 1819.1        | 1122.7     | 0.6         |
| 200957_s_at  | SSRP1                | 5.46E-03 | 756.8      | 830.7      | 891.7      | 876.7       | 897.0       | 875.2       | 788.0       | 678.7   | 594.1   | 603.2   | 678.7    | 763.9    | 653.6    | 639.5    | 875.2         | 653.6      | 0.7         |
| 203016_s_at  | SSX2IP               | 3.37E-03 | 125.2      | 166.7      | 244.2      | 213.8       | 196.7       | 222.8       | 183.5       | 132.4   | 109.1   | 106.5   | 146.1    | 100.0    | 94.6     | 81.8     | 196.7         | 106.5      | 0.5         |
| 207040_s_at  | ST13                 | 4.99E-03 | 5519.8     | 5612.5     | 5881.8     | 5328.7      | 5805.4      | 5988.7      | 5336.3      | 4819.8  | 4634.9  | 4371.4  | 4264.9   | 4603.6   | 4767.1   | 4034.6   | 5612.5        | 4603.6     | 0.8         |
| 213355_at    | ST3GAL6              | 2.34E-03 | 1120.7     | 1155.8     | 1417.6     | 1434.9      | 1235.1      | 1396.0      | 1549.7      | 1015.1  | 876.3   | 1078.6  | 1014.9   | 740.9    | 877.9    | 905.8    | 1396.0        | 905.8      | 0.6         |
| 210942_s_at  | ST3GAL6              | 2.88E-03 | 805.5      | 767.5      | 893.1      | 944.3       | 933.5       | 966.3       | 878.8       | 779.7   | 537.4   | 669.3   | 668.9    | 540.8    | 576.5    | 548.4    | 893.1         | 576.5      | 0.6         |
| 202440_s_at  | ST5                  | 3.97E-03 | 268.2      | 228.6      | 419.3      | 384.6       | 205.5       | 372.2       | 265.1       | 213.5   | 122.2   | 100.4   | 214.6    | 176.9    | 142.1    | 86.9     | 268.2         | 142.1      | 0.5         |
| 236123_at    | ST7L                 | 4.23E-03 | 195.7      | 182.3      | 116.5      | 111.8       | 108.9       | 184.8       | 122.4       | 166.9   | 131.2   | 71.3    | 90.2     | 93.7     | 99.2     | 76.2     | 122.4         | 93.7       | 0.8         |
| 205743_at    | STAC                 | 2.36E-03 | 1517.5     | 1660.8     | 2106.9     | 2021.0      | 1788.6      | 2540.1      | 1701.7      | 1307.5  | 1238.0  | 807.3   | 1233.7   | 509.1    | 856.9    | 627.1    | 1788.6        | 856.9      | 0.5         |
| 227108_at    | STARD9               | 9.77E-03 | 90.8       | 105.0      | 119.2      | 130.3       | 91.3        | 98.3        | 88.4        | 72.6    | 84.7    | 86.0    | 72.8     | 78.6     | 69.6     | 81.9     | 98.3          | 78.6       | 0.8         |
| 231017_at    | STK11                | 3.78E-03 | 499.1      | 650.5      | 605.1      | 593.9       | 554.3       | 671.7       | 568.0       | 419.7   | 460.0   | 353.8   | 376.0    | 453.9    | 561.3    | 426.9    | 593.9         | 426.9      | 0.7         |
| 1553117_a_at | STK38                | 9.29E-03 | 109.6      | 146.5      | 202.8      | 180.6       | 174.1       | 193.5       | 127.1       | 123.5   | 91.3    | 107.2   | 127.7    | 132.7    | 101.1    | 89.0     | 174.1         | 107.2      | 0.6         |
| 202786_at    | STK39                | 1.07E-03 | 280.7      | 321.5      | 382.2      | 485.5       | 539.7       | 635.6       | 433.5       | 250.2   | 182.8   | 211.6   | 302.7    | 261.8    | 251.0    | 163.8    | 433.5         | 250.2      | 0.6         |
| 200783_s_at  | STMN1                | 6.42E-04 | 922.2      | 1175.8     | 1100.9     | 925.2       | 758.0       | 1078.6      | 932.0       | 802.7   | 608.3   | 357.9   | 476.3    | 362.2    | 391.5    | 324.2    | 932.0         | 391.5      | 0.4         |
| 231795_at    | STON1                | 5.80E-03 | 363.9      | 282.3      | 347.4      | 375.9       | 461.6       | 371.2       | 451.3       | 270.0   | 256.8   | 190.6   | 224.7    | 110.5    | 206.6    | 153.6    | 371.2         | 206.6      | 0.6         |
| 1552618_at   | STX6                 | 9.84E-03 | 630.1      | 582.2      | 430.1      | 482.1       | 484.0       | 447.9       | 461.6       | 449.3   | 384.1   | 306.4   | 430.4    | 401.7    | 432.9    | 322.7    | 482.1         | 401.7      | 0.8         |
| 244041_at    | STX6                 | 4.62E-03 | 74.6       | 87.0       | 117.6      | 103.7       | 118.3       | 99.4        | 96.4        | 71.8    | 57.5    | 36.9    | 57.5     | 80.3     | 53.6     | 57.9     | 99.4          | 57.5       | 0.6         |
| 212632_at    | STX7                 | 5.69E-03 | 1814.9     | 1776.8     | 2132.1     | 1931.2      | 2048.8      | 2112.9      | 1686.3      | 1569.4  | 1482.1  | 1276.7  | 1419.9   | 1654.2   | 1629.1   | 1323.9   | 1931.2        | 1482.1     | 0.8         |
| 203615_x_at  | SULT1A1              | 9.91E-03 | 1676.2     | 1284.3     | 2082.7     | 2661.7      | 1119.9      | 1090.0      | 1258.3      | 1365.8  | 781.2   | 871.5   | 1843.3   | 1084.7   | 871.4    | 810.0    | 1284.3        | 871.5      | 0.7         |
| 226850_at    | SUMF1                | 4.37E-03 | 1409.6     | 1445.2     | 1254.9     | 1372.3      | 1482.1      | 1772.2      | 1933.5      | 1286.0  | 1185.9  | 813.6   | 1114.6   | 1052.0   | 1161.5   | 1116.9   | 1445.2        | 1116.9     | 0.8         |
| 204067_at    | SUOX                 | 7.14E-04 | 704.6      | 815.4      | 892.3      | 638.7       | 675.2       | 1028.3      | 683.3       | 530.2   | 540.6   | 351.3   | 403.6    | 431.2    | 451.1    | 319.7    | 704.6         | 431.2      | 0.6         |
| 222566_at    | SUV420H1             | 8.29E-04 | 606.2      | 569.8      | 629.9      | 614.0       | 614.2       | 651.0       | 430.8       | 453.2   | 410.9   | 322.0   | 440.5    | 398.5    | 402.1    | 318.6    | 614.0         | 402.1      | 0.7         |
| 202566_s_at  | SVIL                 | 2.38E-03 | 817.0      | 795.5      | 915.2      | 976.7       | 919.7       | 1247.0      | 921.0       | 809.5   | 543.8   | 478.5   | 652.9    | 586.6    | 794.8    | 569.6    | 919.7         | 586.6      | 0.6         |
| 202565_s_at  | SVIL                 | 1.68E-03 | 3352.2     | 3498.1     | 3653.4     | 4163.2      | 4139.8      | 5464.9      | 4368.8      | 2646.1  | 2542.7  | 2618.8  | 3303.1   | 2022.3   | 3201.4   | 2524.7   | 4139.8        | 2618.8     | 0.6         |
| 226068_at    | SYK                  | 3.53E-03 | 2325.2     | 2217.4     | 2373.5     | 2318.6      | 2284.5      | 2327.7      | 2181.6      | 2027.6  | 1423.9  | 1176.2  | 1753.2   | 1627.1   | 1887.8   | 1399.6   | 2318.6        | 1627.1     | 0.7         |
| 209269_s_at  | SYK                  | 7.65E-03 | 446.8      | 405.7      | 490.5      | 491.3       | 454.1       | 501.0       | 476.6       | 479.5   | 292.5   | 285.6   | 358.2    | 320.7    | 374.5    | 292.4    | 476.6         | 320.7      | 0.7         |
| 224669_at    | SYS1                 | 5.17E-03 | 757.0      | 840.1      | 886.3      | 763.5       | 879.3       | 929.8       | 749.3       | 762.2   | 650.3   | 572.6   | 592.2    |          |          |          |               |            |             |



Supplementary Table S2. Continued.

| ID          | Gene Symbol | p-value  | VW3_Saline | VW6_Saline | VW7_Saline | VW13_Saline | VW22_Saline | VW23_Saline | VW25_Saline | VW3_LPS | VW6_LPS | VW7_LPS | VW13_LPS | VW22_LPS | VW23_LPS | VW25_LPS | Median_saline | Median_LPS | Fold change |
|-------------|-------------|----------|------------|------------|------------|-------------|-------------|-------------|-------------|---------|---------|---------|----------|----------|----------|----------|---------------|------------|-------------|
| 203677_s_at | TARBP2      | 4.92E-03 | 116.6      | 107.3      | 142.0      | 134.6       | 142.2       | 130.6       | 116.6       | 111.9   | 73.0    | 79.7    | 103.6    | 107.5    | 95.0     | 85.1     | 130.6         | 95.0       | 0.7         |
| 209154_at   | TAX1BP3     | 3.18E-03 | 2700.7     | 3225.2     | 3783.6     | 3586.1      | 3745.6      | 3584.5      | 3397.0      | 2349.6  | 2597.9  | 2507.0  | 2979.7   | 2486.4   | 2121.5   | 1965.5   | 3584.5        | 2486.4     | 0.7         |
| 228258_at   | TBC1D10C    | 1.99E-03 | 339.8      | 327.9      | 378.6      | 324.5       | 307.2       | 422.4       | 274.8       | 283.1   | 168.2   | 128.0   | 233.8    | 183.5    | 241.1    | 97.5     | 327.9         | 183.5      | 0.6         |
| 224622_at   | TBC1D14     | 6.66E-03 | 188.2      | 157.5      | 246.0      | 264.0       | 271.9       | 203.2       | 224.1       | 188.1   | 116.0   | 152.1   | 181.0    | 201.9    | 168.3    | 133.2    | 224.1         | 168.3      | 0.8         |
| 230072_at   | TBC1D15     | 8.63E-03 | 88.1       | 103.8      | 207.8      | 182.7       | 190.4       | 216.3       | 182.3       | 102.7   | 75.3    | 97.0    | 133.1    | 77.2     | 69.8     | 74.2     | 182.7         | 77.2       | 0.4         |
| 222173_s_at | TBC1D2      | 1.58E-03 | 501.0      | 265.0      | 400.1      | 385.7       | 399.6       | 331.0       | 359.2       | 332.5   | 144.6   | 184.4   | 218.5    | 343.9    | 261.9    | 187.5    | 385.7         | 218.5      | 0.6         |
| 227908_at   | TBC1D24     | 1.01E-03 | 371.4      | 395.2      | 327.3      | 357.9       | 367.1       | 309.4       | 252.4       | 321.2   | 212.5   | 152.5   | 247.4    | 203.4    | 213.3    | 140.4    | 357.9         | 212.5      | 0.6         |
| 203387_s_at | TBC1D4      | 5.92E-03 | 1544.2     | 2439.7     | 2231.9     | 1811.7      | 2114.7      | 2391.0      | 1525.4      | 1440.7  | 1906.2  | 1214.7  | 1585.2   | 1407.5   | 1237.4   | 853.7    | 2114.7        | 1407.5     | 0.7         |
| 201814_at   | TBC1D5      | 3.22E-03 | 959.8      | 959.6      | 994.5      | 963.8       | 1145.2      | 1146.7      | 976.4       | 869.7   | 707.2   | 567.2   | 755.9    | 845.7    | 832.6    | 623.3    | 976.4         | 755.9      | 0.8         |
| 222633_at   | TBL1XR1     | 7.78E-03 | 1383.9     | 1214.9     | 1455.6     | 1489.6      | 1541.0      | 1586.4      | 2000.7      | 1265.0  | 987.1   | 978.7   | 1318.1   | 1016.4   | 1090.2   | 1020.6   | 1489.6        | 1020.6     | 0.7         |
| 223013_at   | TBL1XR1     | 6.84E-03 | 1939.3     | 2275.0     | 2825.6     | 2530.9      | 2719.5      | 2838.0      | 3133.2      | 1813.0  | 1709.8  | 1593.5  | 2382.9   | 1686.7   | 1689.4   | 1634.7   | 2719.5        | 1689.4     | 0.6         |
| 230320_at   | TBRG1       | 5.92E-03 | 262.5      | 341.5      | 352.3      | 355.0       | 346.1       | 382.6       | 325.0       | 278.9   | 232.5   | 188.5   | 288.8    | 209.9    | 214.0    | 202.4    | 346.1         | 214.0      | 0.6         |
| 226388_at   | TCEA3       | 8.51E-04 | 792.1      | 630.6      | 964.5      | 756.7       | 743.6       | 833.0       | 512.9       | 585.0   | 332.5   | 370.8   | 349.7    | 559.6    | 536.2    | 226.1    | 756.7         | 370.8      | 0.5         |
| 204045_at   | TCEAL1      | 8.13E-03 | 267.0      | 258.1      | 412.7      | 327.0       | 342.2       | 371.2       | 307.4       | 238.8   | 230.2   | 287.4   | 288.3    | 214.6    | 206.2    | 184.6    | 327.0         | 230.2      | 0.7         |
| 213877_x_at | TCEB2       | 2.49E-03 | 519.5      | 425.6      | 355.3      | 469.1       | 423.8       | 431.4       | 356.3       | 357.6   | 329.8   | 211.7   | 242.7    | 328.2    | 351.8    | 266.8    | 425.6         | 328.2      | 0.8         |
| 210776_x_at | TCF3        | 8.28E-03 | 943.7      | 741.6      | 840.3      | 890.9       | 830.3       | 743.8       | 842.8       | 801.0   | 656.6   | 607.8   | 681.8    | 650.1    | 615.7    | 711.1    | 840.3         | 656.6      | 0.8         |
| 213730_x_at | TCF3        | 6.24E-03 | 417.7      | 395.6      | 411.3      | 386.6       | 374.5       | 341.3       | 347.4       | 373.2   | 304.9   | 263.0   | 305.3    | 268.5    | 273.6    | 296.1    | 386.6         | 296.1      | 0.8         |
| 213811_x_at | TCF3        | 9.47E-03 | 923.2      | 744.2      | 901.5      | 889.9       | 807.3       | 723.6       | 854.3       | 850.4   | 635.2   | 636.4   | 670.3    | 667.2    | 612.8    | 602.6    | 854.3         | 636.4      | 0.7         |
| 209153_s_at | TCF3        | 3.50E-03 | 269.6      | 264.8      | 391.0      | 310.5       | 330.4       | 320.9       | 304.1       | 284.0   | 112.3   | 154.3   | 210.4    | 195.9    | 190.7    | 125.7    | 310.5         | 190.7      | 0.6         |
| 213780_at   | TCHH        | 5.22E-03 | 142.3      | 83.3       | 211.7      | 221.1       | 246.2       | 188.5       | 150.0       | 131.0   | 77.5    | 107.6   | 130.4    | 104.6    | 65.6     | 52.3     | 188.5         | 104.6      | 0.6         |
| 203054_s_at | TCTA        | 7.74E-03 | 250.0      | 293.7      | 226.8      | 263.7       | 243.0       | 238.5       | 224.1       | 240.6   | 172.6   | 171.7   | 179.4    | 190.2    | 205.5    | 151.4    | 243.0         | 179.4      | 0.7         |
| 219715_s_at | TDP1        | 5.99E-03 | 127.4      | 149.9      | 186.5      | 165.1       | 115.2       | 174.4       | 126.4       | 130.9   | 85.4    | 96.1    | 137.2    | 85.2     | 96.7     | 73.3     | 149.9         | 96.1       | 0.6         |
| 225840_at   | TEF         | 5.44E-03 | 164.5      | 148.6      | 214.1      | 178.8       | 127.0       | 174.9       | 143.3       | 148.9   | 90.8    | 87.8    | 130.5    | 100.2    | 88.7     | 103.6    | 164.5         | 100.2      | 0.6         |
| 221035_s_at | TEX14       | 3.92E-04 | 710.2      | 922.1      | 952.0      | 892.3       | 645.0       | 1078.9      | 905.4       | 506.9   | 455.2   | 311.5   | 427.7    | 392.0    | 482.5    | 276.0    | 905.4         | 427.7      | 0.5         |
| 218099_at   | TEX2        | 5.87E-04 | 1108.2     | 1324.2     | 1113.5     | 1232.6      | 1132.5      | 1372.3      | 1080.1      | 883.3   | 729.8   | 393.5   | 739.9    | 639.8    | 591.3    | 418.2    | 1132.5        | 639.8      | 0.6         |
| 227642_at   | TFCP2L1     | 9.22E-03 | 85.1       | 122.2      | 101.0      | 95.4        | 129.7       | 107.1       | 75.2        | 83.1    | 76.3    | 65.0    | 86.1     | 69.7     | 82.8     | 35.2     | 101.0         | 76.3       | 0.8         |
| 219735_s_at | TFCP2L1     | 5.38E-04 | 189.5      | 318.6      | 267.3      | 267.0       | 249.6       | 214.1       | 155.7       | 147.8   | 165.0   | 152.4   | 188.5    | 130.4    | 88.5     | 92.0     | 249.6         | 147.8      | 0.6         |
| 226157_at   | TFDP2       | 8.22E-03 | 61.2       | 100.7      | 122.2      | 159.7       | 129.0       | 136.7       | 153.8       | 71.1    | 56.5    | 57.8    | 125.6    | 86.3     | 75.7     | 73.2     | 129.0         | 73.2       | 0.6         |
| 206943_at   | TGFBF1      | 9.36E-03 | 215.8      | 182.3      | 249.5      | 235.4       | 236.1       | 268.2       | 272.4       | 228.7   | 128.5   | 172.6   | 189.5    | 156.9    | 188.3    | 137.9    | 236.1         | 172.6      | 0.7         |
| 224793_s_at | TGFBF1      | 4.69E-03 | 626.9      | 563.6      | 987.8      | 891.3       | 876.1       | 1032.5      | 1177.0      | 568.6   | 479.7   | 594.3   | 692.6    | 521.7    | 550.6    | 549.5    | 891.3         | 550.6      | 0.6         |
| 208944_at   | TGFBF2      | 1.47E-03 | 2760.4     | 2874.8     | 3054.5     | 2894.5      | 2897.5      | 2987.2      | 2522.7      | 2314.6  | 2218.9  | 1881.0  | 2229.5   | 1897.0   | 1943.7   | 1812.8   | 2894.5        | 1943.7     | 0.7         |
| 203888_at   | THBD        | 1.76E-03 | 2730.3     | 3035.5     | 1502.2     | 1910.8      | 1518.9      | 1977.0      | 3609.3      | 1820.8  | 2588.3  | 1063.9  | 1352.5   | 1122.9   | 1602.0   | 2562.4   | 1977.0        | 1602.0     | 0.8         |
| 203887_s_at | THBD        | 4.06E-03 | 929.7      | 1151.0     | 570.3      | 651.0       | 605.0       | 804.9       | 1494.6      | 784.6   | 880.1   | 388.6   | 585.6    | 427.6    | 606.1    | 924.0    | 804.9         | 606.1      | 0.8         |
| 239336_at   | THBS1       | 6.70E-03 | 40.9       | 276.3      | 68.0       | 37.1        | 41.9        | 62.5        | 204.3       | 32.0    | 156.3   | 33.3    | 30.4     | 35.8     | 37.2     | 65.3     | 62.5          | 35.8       | 0.6         |
| 204064_at   | THOC1       | 8.91E-03 | 1436.2     | 1369.5     | 1478.2     | 1418.8      | 1354.1      | 1261.6      | 1264.7      | 1183.4  | 1192.5  | 1021.9  | 1152.8   | 995.6    | 1132.7   | 1014.1   | 1369.5        | 1132.7     | 0.8         |
| 223711_s_at | THYNI       | 4.62E-03 | 723.5      | 683.5      | 649.3      | 717.1       | 656.2       | 778.9       | 710.4       | 618.7   | 437.6   | 256.2   | 501.0    | 545.2    | 488.8    | 302.3    | 710.4         | 488.8      | 0.7         |
| 206409_at   | TIAM1       | 7.93E-03 | 203.6      | 186.8      | 243.4      | 245.1       | 271.6       | 227.8       | 249.9       | 194.4   | 132.2   | 191.0   | 178.5    | 231.7    | 182.3    | 176.6    | 243.4         | 182.3      | 0.7         |
| 213135_at   | TIAM1       | 8.25E-04 | 1536.8     | 1506.7     | 1711.1     | 1921.2      | 1927.0      | 1836.3      | 1726.7      | 1340.3  | 1034.0  | 1139.6  | 1215.3   | 1286.0   | 1026.3   | 1087.3   | 1726.7        | 1139.6     | 0.7         |
| 224365_s_at | TIGD7       | 3.09E-03 | 412.0      | 434.3      | 536.5      | 445.7       | 346.5       | 353.7       | 381.4       | 325.2   | 327.2   | 296.1   | 402.7    | 216.5    | 211.3    | 279.8    | 412.0         | 296.1      | 0.7         |
| 224560_at   | TIMP2       | 3.42E-03 | 8277.7     | 8841.7     | 8528.6     | 8045.4      | 8416.0      | 8651.7      | 8380.6      | 7240.2  | 7545.7  | 5163.8  | 6137.6   | 6164.9   | 6038.5   | 5631.9   | 8416.0        | 6137.6     | 0.7         |
| 231579_s_at | TIMP2       | 3.51E-03 | 9198.3     | 9378.3     | 9767.4     | 9349.9      | 9680.0      | 10222.5     | 9958.0      | 7783.6  | 8383.1  | 6516.0  | 7322.3   | 6869.2   | 7052.8   | 6451.3   | 9680.0        | 7052.8     | 0.7         |
| 204227_s_at | TK2         | 7.54E-03 | 227.2      | 259.5      | 258.0      | 262.3       | 234.8       | 341.9       | 226.8       | 215.2   | 136.0   | 120.9   | 207.1    | 212.9    | 206.6    | 122.3    | 258.0         | 206.6      | 0.8         |
| 204276_at   | TK2         | 7.95E-04 | 836.3      | 1105.6     | 1032.6     | 1134.2      | 983.7       | 1423.2      | 986.5       | 681.5   | 625.0   | 348.2   | 690.8    | 546.4    | 712.1    | 394.9    | 1032.6        | 625.0      | 0.6         |
| 204277_s_at | TK2         | 9.24E-04 | 1384.2     | 1486.6     | 1390.9     | 1647.6      | 1230.6      | 1566.4      | 1072.3      | 843.6   | 828.3   | 416.8   | 834.1    | 871.2    | 1048.3   | 529.1    | 1390.9        | 834.1      | 0.6         |
| 208700_s_at | TKT         | 2.86E-03 | 4310.1     | 4944.8     | 5616.4     | 5202.9      | 5007.8      | 6230.7      | 4926.4      | 3648.3  | 3087.6  | 2240.2  | 3246.4   | 3929.8   | 4345.5   | 2714.2   | 5007.8        | 3246.4     | 0.6         |
| 208699_x_at | TKT         | 5.95E-03 | 1973.0     | 2190.2     | 2933.8     | 2925.4      | 2297.6      | 3307.7      | 2627.0      | 1572.7  | 1293.3  | 1088.6  | 1491.6   | 2277.0   | 2360.3   | 1357.6   | 2627.0        | 1491.6     | 0.6         |
| 221060_s_at | TLR4        | 4.37E-03 | 671.9      | 844.3      | 831.2      | 791.7       | 827.8       | 764.4       | 702.8       | 460.0   | 680.5   | 658.3   | 678.1    | 614.7    | 500.0    | 597.0    | 791.7         | 614.7      | 0.8         |
| 210166_at   | TLR5        | 9.51E-03 | 228.2      | 300.1      | 441.8      | 344.4       | 397.4       | 345.2       | 256.6       | 244.7   | 178.2   | 85.6    | 205.7    | 263.4    | 159.0    | 93.0     | 344.4         | 178.2      | 0.5         |
| 219892_at   | TM6SF1      | 8.25E-03 | 265.4      | 571.7      | 531.6      | 568.3       | 428.3       | 617.5       | 506.5       | 325.1   | 375.4   | 251.5   | 358.4    | 283.3    | 268.9    | 214.6    | 531.6         | 283.3      | 0.5         |
| 222477_s_at | TM7SF3      | 8.11E-03 | 875.9      | 1126.1     | 822.7      | 894.4       | 811.9       | 870.2       | 733.4       | 863.3   | 721.7   | 438.0   | 724.6    | 645.2    | 664.1    | 464.3    | 870.2         | 664.1      | 0.8         |
| 217974_at   | TM7SF3      | 7.31E-03 | 209.2      | 238.5      | 257.4      | 190.0       | 259.9       | 269.5       | 250.6       | 231.8   | 142.8   | 137.2   | 157.2    | 167.7    | 153.9    | 152.2    | 250.6         | 153.9      | 0.6         |
| 221266_s_at | TM7SF4      | 1.26E-03 | 1294.3     | 1180.2     | 1644.0     | 1683.5      | 1496.2      | 478.5       | 1652.9      | 1111.8  | 648.2   | 468.5   | 860.1    | 857.8    | 189.3    | 509.0    | 1496.2        | 468.2      | 0.4         |
| 224755_at   | TM9SF3      | 7.17E-03 | 828.3      | 827.6      | 889.5      | 1207.3      | 977.5       | 990.0       | 1316.5      | 823.3   | 712.1   | 517.2   | 933.5    | 675.3    | 617.2    | 772.2    | 977.5         | 712.1      | 0.7         |
| 204328_at   | TMC6        | 4.34E-03 | 3521.6     | 3768.2     | 4062.8     | 3990.2      | 3441.5      | 3131.9      | 3569.4      | 3119.3  | 3067.4  | 2084.6  | 2760.5   | 2512.6   | 2419.3   | 2228.0   | 3569.4        | 2512.6     | 0.7         |
| 242644_at   | TMC8        | 7.53E-03 | 111.6      | 114.3      | 170.7      | 149.1       | 126.4       | 149.8       | 148.9       | 108.3   | 76.3    | 91.2    | 124.6    | 90.0     | 101.4    | 117.9    | 148.9         | 101.4      | 0.7         |
| 227353_at   | TMC8        | 6.40E-04 | 722.1      | 747.5      | 719.0      | 808.9       | 698.0       | 801.5       | 803.6       | 428.1   | 374.7   | 165.7   | 425.2    | 407.9    | 444.3    | 333.7    | 747.5         | 407.9      | 0.5         |
| 212352_s_at | TMED10      | 7.33E-03 | 2752.7     | 3296.5     | 3266.0     | 2680.3      | 2887.7      | 3301.9      | 3079.3      | 2512.5  | 2559.9  | 1947.3  | 2543.3   | 2011.2   | 2150.1   | 2001.6   | 3079.3        | 2150.1     | 0.7         |
| 225004_at   | TMEM101     | 5.29E-03 | 1197.3     | 1231.6     | 1190.5     | 1310.3      | 1158.5      |             |             |         |         |         |          |          |          |          |               |            |             |

TRANSCRIPTION PROFILES IN ALVEOLAR MACROPHAGES

Supplementary Table S2. Continued.

| ID           | Gene Symbol         | p-value  | VW3_Saline | VW6_Saline | VW7_Saline | VW13_Saline | VW22_Saline | VW23_Saline | VW25_Saline | VW3_LPS | VW6_LPS | VW7_LPS | VW13_LPS | VW22_LPS | VW23_LPS | VW25_LPS | Median_saline | Median_LPS | Fold change |  |
|--------------|---------------------|----------|------------|------------|------------|-------------|-------------|-------------|-------------|---------|---------|---------|----------|----------|----------|----------|---------------|------------|-------------|--|
| 228981_at    | TMEM169             | 6.67E-03 | 55.9       | 117.0      | 102.2      | 85.4        | 102.0       | 157.6       | 76.8        | 51.7    | 74.5    | 37.4    | 76.9     | 63.9     | 56.9     | 31.3     | 102.0         | 56.9       | 0.6         |  |
| 224929_at    | TMEM173             | 8.92E-04 | 984.2      | 917.1      | 1090.8     | 1279.4      | 841.3       | 1218.8      | 959.4       | 668.5   | 561.4   | 271.2   | 668.6    | 445.8    | 668.2    | 423.1    | 984.2         | 561.4      | 0.6         |  |
| 224916_at    | TMEM173             | 1.07E-03 | 669.1      | 473.0      | 616.5      | 764.1       | 531.1       | 684.8       | 547.9       | 447.4   | 296.3   | 166.9   | 371.7    | 334.4    | 409.1    | 249.8    | 616.5         | 334.4      | 0.5         |  |
| 1555790_a_at | TMEM192             | 7.18E-03 | 150.1      | 181.6      | 208.2      | 220.2       | 202.3       | 202.2       | 218.1       | 152.1   | 131.2   | 143.6   | 186.0    | 140.2    | 120.1    | 120.8    | 202.3         | 140.2      | 0.7         |  |
|              | /// ZNF320          |          |            |            |            |             |             |             |             |         |         |         |          |          |          |          |               |            |             |  |
| 228671_at    | TMEM201             | 3.89E-03 | 187.6      | 175.7      | 193.9      | 218.5       | 176.2       | 209.0       | 181.5       | 150.9   | 158.2   | 147.7   | 142.6    | 134.7    | 142.5    | 141.3    | 187.6         | 142.6      | 0.8         |  |
| 238831_at    | TMEM33              | 8.00E-03 | 3120.6     | 3478.7     | 4409.6     | 4428.1      | 3516.6      | 4403.8      | 4401.3      | 2981.1  | 2992.7  | 3239.0  | 3599.6   | 2334.0   | 3090.7   | 3313.7   | 4401.3        | 3090.7     | 0.7         |  |
| 226361_at    | TMEM42              | 9.35E-03 | 392.8      | 417.1      | 498.1      | 393.4       | 455.7       | 466.4       | 359.0       | 415.9   | 275.0   | 285.5   | 282.4    | 364.0    | 359.2    | 244.5    | 417.1         | 285.5      | 0.7         |  |
| 234672_s_at  | TMEM48              | 2.29E-03 | 374.7      | 432.3      | 488.5      | 495.4       | 451.2       | 511.2       | 497.1       | 349.9   | 266.5   | 240.5   | 392.1    | 253.0    | 259.9    | 221.7    | 488.5         | 259.9      | 0.5         |  |
| 219462_at    | TMEM53              | 5.27E-03 | 461.4      | 497.4      | 450.0      | 416.1       | 411.1       | 469.0       | 403.7       | 480.2   | 300.2   | 213.9   | 260.5    | 290.3    | 357.0    | 242.0    | 450.0         | 290.3      | 0.6         |  |
| 1554077_a_at | TMEM53              | 8.22E-03 | 333.2      | 287.8      | 360.7      | 376.4       | 297.2       | 356.7       | 353.6       | 315.6   | 170.3   | 160.0   | 212.4    | 227.3    | 328.8    | 213.8    | 353.6         | 213.8      | 0.6         |  |
| 234980_at    | TMEM56              | 5.10E-03 | 100.4      | 217.2      | 199.9      | 136.6       | 146.1       | 219.1       | 177.3       | 114.1   | 126.0   | 96.5    | 102.9    | 72.1     | 91.5     | 90.3     | 177.3         | 96.5       | 0.5         |  |
| 237515_at    | TMEM56              | 9.23E-03 | 27.4       | 81.1       | 93.0       | 76.4        | 99.9        | 106.1       | 88.0        | 38.5    | 42.4    | 25.5    | 42.5     | 43.6     | 19.6     | 15.8     | 88.0          | 38.5       | 0.4         |  |
| 221951_at    | TMEM80              | 1.15E-03 | 113.7      | 130.0      | 139.3      | 192.8       | 216.3       | 190.4       | 193.7       | 93.2    | 90.7    | 91.1    | 134.7    | 160.7    | 101.4    | 104.6    | 190.4         | 101.4      | 0.5         |  |
| 227570_at    | TMEM86A             | 9.28E-03 | 190.1      | 270.6      | 236.4      | 229.1       | 194.8       | 228.7       | 159.9       | 171.7   | 131.9   | 81.3    | 161.4    | 198.6    | 122.3    | 67.9     | 228.7         | 131.9      | 0.6         |  |
| 238710_at    | TMEM86A             | 2.92E-03 | 386.1      | 386.5      | 412.5      | 423.7       | 454.1       | 437.9       | 334.2       | 378.0   | 170.2   | 175.6   | 251.1    | 351.5    | 222.4    | 131.9    | 412.5         | 222.4      | 0.5         |  |
| 229957_at    | TMEM91              | 2.43E-03 | 362.4      | 345.9      | 539.2      | 557.7       | 349.9       | 474.8       | 435.3       | 298.2   | 281.9   | 220.7   | 366.0    | 216.7    | 303.4    | 241.0    | 435.3         | 281.9      | 0.6         |  |
| 214283_at    | TMEM97              | 1.40E-03 | 774.4      | 766.3      | 634.4      | 699.4       | 671.4       | 739.8       | 594.1       | 617.3   | 536.7   | 425.8   | 498.7    | 524.0    | 501.7    | 482.2    | 699.4         | 501.7      | 0.7         |  |
| 226186_at    | TMOD2               | 8.75E-03 | 212.3      | 181.0      | 344.0      | 240.7       | 301.5       | 309.2       | 287.1       | 203.1   | 133.0   | 135.8   | 203.9    | 211.8    | 184.4    | 160.6    | 287.1         | 184.4      | 0.6         |  |
| 226322_at    | TMTC1               | 6.23E-03 | 66.0       | 51.2       | 64.3       | 144.4       | 101.1       | 117.2       | 34.2        | 61.9    | 32.6    | 26.2    | 109.0    | 54.7     | 54.0     | 28.6     | 66.0          | 54.0       | 0.8         |  |
| 225666_at    | TMTC4               | 6.21E-03 | 263.3      | 360.3      | 533.9      | 408.4       | 349.0       | 526.6       | 263.8       | 269.1   | 281.4   | 277.9   | 319.2    | 212.0    | 254.2    | 154.4    | 360.3         | 269.1      | 0.7         |  |
| 223583_at    | TNFAIP8L2           | 4.24E-03 | 850.6      | 982.9      | 967.3      | 1082.4      | 908.0       | 1104.3      | 865.0       | 760.3   | 628.9   | 396.2   | 794.4    | 693.0    | 694.9    | 559.3    | 967.3         | 693.0      | 0.7         |  |
| 205611_at    | TNFSF12             | 6.72E-04 | 486.7      | 581.1      | 521.1      | 639.2       | 562.4       | 656.5       | 579.6       | 441.8   | 346.9   | 266.4   | 364.2    | 354.6    | 350.1    | 318.5    | 579.6         | 350.1      | 0.6         |  |
| 211495_x_at  | TNFSF12             | 8.92E-03 | 1581.0     | 1492.7     | 1560.3     | 1693.7      | 1168.9      | 1457.3      | 1445.9      | 1358.7  | 1024.2  | 676.3   | 1138.7   | 1106.9   | 1116.9   | 818.9    | 1492.7        | 1106.9     | 0.7         |  |
|              | TNFSF13 /// TNFSF13 |          |            |            |            |             |             |             |             |         |         |         |          |          |          |          |               |            |             |  |
| 209499_x_at  | TNFSF12             | 5.03E-03 | 2037.6     | 2038.6     | 2014.3     | 2127.6      | 1495.2      | 1881.0      | 1889.5      | 1609.8  | 1298.4  | 946.2   | 1408.3   | 1392.1   | 1494.8   | 1091.4   | 2014.3        | 1392.1     | 0.7         |  |
|              | TNFSF13 /// TNFSF13 |          |            |            |            |             |             |             |             |         |         |         |          |          |          |          |               |            |             |  |
| 209500_x_at  | TNFSF12             | 2.08E-03 | 2660.7     | 2683.7     | 2668.9     | 2626.4      | 2133.3      | 2742.1      | 2397.1      | 2040.9  | 1819.0  | 1138.5  | 1652.5   | 1526.3   | 2195.0   | 1404.9   | 2660.7        | 1652.5     | 0.6         |  |
|              | TNFSF13 /// TNFSF13 |          |            |            |            |             |             |             |             |         |         |         |          |          |          |          |               |            |             |  |
| 229326_at    | TNFSF13             | 1.13E-03 | 5110.9     | 5425.3     | 4910.2     | 5117.2      | 4106.6      | 5346.3      | 4294.8      | 3804.8  | 3925.3  | 2189.4  | 3318.7   | 2773.4   | 3880.2   | 2620.2   | 5110.9        | 3318.7     | 0.6         |  |
| 210314_x_at  | TNFSF13             | 9.79E-04 | 1976.0     | 1926.0     | 1869.1     | 2058.7      | 1552.2      | 2028.2      | 1796.1      | 1411.8  | 1287.1  | 830.5   | 1174.7   | 1169.5   | 1482.1   | 996.0    | 1926.0        | 1174.7     | 0.6         |  |
| 206393_at    | TNNI2               | 2.16E-03 | 474.1      | 380.0      | 461.1      | 375.4       | 360.5       | 429.8       | 290.2       | 336.2   | 261.2   | 209.3   | 227.9    | 287.5    | 352.9    | 167.5    | 380.0         | 261.2      | 0.7         |  |
| 221747_at    | TNS1                | 2.76E-03 | 637.3      | 185.2      | 279.7      | 123.8       | 159.7       | 116.9       | 135.3       | 261.2   | 100.5   | 91.5    | 72.4     | 126.1    | 74.7     | 109.3    | 159.7         | 100.5      | 0.6         |  |
| 221748_s_at  | TNS1                | 2.26E-03 | 393.6      | 134.0      | 212.1      | 86.5        | 117.1       | 76.0        | 124.7       | 197.3   | 40.8    | 59.4    | 59.7     | 91.5     | 51.1     | 43.7     | 124.7         | 59.4       | 0.5         |  |
| 228834_at    | TOB1                | 8.90E-03 | 1929.5     | 1631.5     | 1644.8     | 1709.6      | 1032.3      | 2237.6      | 1602.0      | 1541.8  | 1391.3  | 765.2   | 1312.8   | 886.3    | 1272.5   | 1203.2   | 1644.8        | 1272.5     | 0.8         |  |
| 200662_s_at  | TOMM20              | 2.20E-03 | 2302.3     | 2313.6     | 3044.6     | 2553.6      | 2545.5      | 2967.7      | 2634.0      | 2059.0  | 1751.6  | 1856.7  | 1980.2   | 1808.9   | 2004.3   | 1653.9   | 2553.6        | 1856.7     | 0.7         |  |
| 225802_at    | TOP1MT              | 4.26E-03 | 572.8      | 666.0      | 569.1      | 502.8       | 625.4       | 730.9       | 550.8       | 513.8   | 441.6   | 330.4   | 369.2    | 540.2    | 553.1    | 337.9    | 572.8         | 441.6      | 0.8         |  |
| 203786_s_at  | TPD52L1             | 9.72E-03 | 126.4      | 220.1      | 539.5      | 292.0       | 430.2       | 490.1       | 361.7       | 117.1   | 163.3   | 221.1   | 187.7    | 407.0    | 211.8    | 139.5    | 361.7         | 187.7      | 0.5         |  |
| 210987_x_at  | TPM1                | 4.68E-03 | 230.0      | 178.2      | 307.6      | 308.2       | 309.9       | 268.3       | 249.6       | 236.5   | 95.6    | 136.7   | 227.5    | 178.2    | 196.2    | 143.1    | 268.3         | 178.2      | 0.7         |  |
| 204083_s_at  | TPM2                | 6.46E-03 | 594.5      | 709.0      | 771.6      | 432.1       | 647.2       | 451.7       | 651.5       | 388.8   | 471.9   | 404.1   | 316.0    | 600.0    | 418.0    | 403.4    | 647.2         | 404.1      | 0.6         |  |
| 224871_at    | TPRG1L              | 6.11E-03 | 904.7      | 923.6      | 1036.7     | 1046.7      | 903.4       | 946.9       | 1017.9      | 777.8   | 729.3   | 681.6   | 679.1    | 751.5    | 839.7    | 731.4    | 946.9         | 731.4      | 0.8         |  |
| 204079_at    | TPST2               | 2.99E-03 | 724.5      | 822.0      | 831.6      | 958.9       | 703.0       | 728.6       | 1062.6      | 724.9   | 537.7   | 501.7   | 641.1    | 503.2    | 514.2    | 632.3    | 822.0         | 537.7      | 0.7         |  |
| 202080_s_at  | TRAK1               | 1.32E-03 | 563.2      | 537.5      | 499.2      | 494.5       | 480.8       | 421.0       | 416.8       | 436.8   | 345.3   | 300.3   | 382.9    | 366.2    | 324.4    | 293.8    | 494.5         | 345.3      | 0.7         |  |
| 219937_at    | TRHDE               | 7.82E-03 | 279.0      | 506.3      | 726.1      | 529.7       | 561.6       | 734.9       | 367.5       | 323.7   | 371.3   | 327.6   | 349.0    | 266.6    | 252.8    | 115.8    | 529.7         | 323.7      | 0.6         |  |
| 218403_at    | TRIAP1              | 5.04E-03 | 2446.9     | 2332.1     | 2693.3     | 2538.3      | 2521.9      | 2796.2      | 2586.6      | 2046.8  | 1963.9  | 1722.6  | 2217.5   | 1811.8   | 2095.6   | 1938.6   | 2538.3        | 1963.9     | 0.8         |  |
| 242056_at    | TRIM45              | 2.98E-03 | 46.5       | 54.5       | 80.0       | 57.4        | 73.7        | 77.4        | 54.8        | 48.7    | 31.6    | 35.6    | 41.4     | 38.9     | 43.6     | 27.0     | 57.4          | 38.9       | 0.7         |  |
| 221897_at    | TRIM52              | 8.81E-03 | 348.0      | 564.5      | 514.1      | 416.1       | 482.0       | 483.7       | 403.3       | 357.0   | 303.0   | 296.4   | 392.3    | 329.8    | 304.4    | 227.1    | 482.0         | 304.4      | 0.6         |  |
| 223132_s_at  | TRIM8               | 4.67E-03 | 3515.3     | 3560.2     | 3769.1     | 3707.5      | 3726.3      | 4112.7      | 3542.2      | 3258.5  | 2787.7  | 1956.7  | 2796.2   | 2767.3   | 2896.8   | 2182.2   | 3707.5        | 2787.7     | 0.8         |  |
| 221012_s_at  | TRIM8               | 1.98E-03 | 2282.8     | 2175.7     | 2605.5     | 2858.1      | 2528.7      | 2690.2      | 2153.9      | 2132.3  | 1505.3  | 1270.9  | 1902.4   | 1720.0   | 1680.8   | 1319.4   | 2528.7        | 1680.8     | 0.7         |  |
| 208178_x_at  | TRIO                | 4.82E-03 | 377.9      | 413.7      | 416.6      | 413.4       | 410.7       | 420.3       | 377.1       | 352.4   | 228.1   | 214.7   | 300.7    | 341.1    | 304.1    | 194.2    | 413.4         | 300.7      | 0.7         |  |
| 209013_x_at  | TRIO                | 3.32E-03 | 342.0      | 381.4      | 425.1      | 389.7       | 374.3       | 416.3       | 341.4       | 331.6   | 206.8   | 203.0   | 271.7    | 280.8    | 257.8    | 220.0    | 381.4         | 257.8      | 0.7         |  |
| 209012_at    | TRIO                | 1.14E-03 | 578.2      | 610.9      | 778.2      | 727.5       | 637.8       | 711.3       | 688.6       | 499.8   | 402.3   | 385.4   | 489.3    | 447.4    | 449.7    | 373.1    | 688.6         | 447.4      | 0.6         |  |
| 221952_x_at  | TRMT5               | 6.21E-03 | 7142.0     | 7250.8     | 9366.4     | 8223.0      | 7892.7      | 8883.8      | 8623.3      | 6243.1  | 6488.8  | 6687.1  | 7020.1   | 5656.6   | 6066.9   | 6012.9   | 8223.0        | 6243.1     | 0.8         |  |
| 228997_at    | TRNAU1AP            | 8.60E-03 | 1160.5     | 1105.2     | 1424.5     | 1505.0      | 1191.9      | 1211.7      | 1440.1      | 1111.5  | 875.4   | 903.5   | 1134.8   | 1059.7   | 855.8    | 895.0    | 1211.7        | 855.8      | 0.7         |  |
| 218502_s_at  | TRPS1               | 3.17E-03 | 261.0      | 222.6      | 234.6      | 316.7       | 301.7       | 215.7       | 244.7       | 186.5   | 167.6   | 152.1   | 243.6    | 233.9    | 149.9    | 224.4    | 244.7         | 186.5      | 0.8         |  |
| 219632_s_at  | TRPV1               | 6.88E-03 | 91.4       | 100.1      | 149.6      | 111.3       | 127.4       | 13          |             |         |         |         |          |          |          |          |               |            |             |  |

Supplementary Table S2. *Continued.*

| ID           | Gene Symbol | p-value  | VW3_Saline | VW6_Saline | VW7_Saline | VW13_Saline | VW22_Saline | VW23_Saline | VW25_Saline | VW3_LPS | VW6_LPS | VW7_LPS | VW13_LPS | VW22_LPS | VW23_LPS | VW25_LPS | Median_saline | Median_LPS | Fold change |
|--------------|-------------|----------|------------|------------|------------|-------------|-------------|-------------|-------------|---------|---------|---------|----------|----------|----------|----------|---------------|------------|-------------|
| 234004_at    | TTC28       | 9.28E-03 | 57.0       | 65.7       | 87.6       | 87.2        | 69.0        | 84.0        | 67.4        | 46.5    | 44.4    | 46.8    | 69.4     | 59.4     | 72.2     | 53.3     | 69.0          | 53.3       | 0.8         |
| 213058_at    | TTC28       | 6.44E-03 | 40.8       | 59.0       | 76.1       | 70.2        | 81.0        | 91.3        | 56.1        | 42.1    | 48.2    | 31.2    | 50.4     | 34.2     | 36.6     | 28.6     | 70.2          | 36.6       | 0.5         |
| 208662_s_at  | TTC3        | 3.97E-03 | 412.9      | 433.5      | 455.9      | 478.5       | 488.7       | 543.5       | 485.4       | 380.2   | 275.3   | 248.2   | 392.6    | 381.6    | 363.4    | 311.5    | 478.5         | 363.4      | 0.8         |
| 208073_x_at  | TTC3        | 6.85E-03 | 1295.2     | 1673.7     | 1714.1     | 1683.7      | 1871.1      | 1875.0      | 1651.6      | 1389.9  | 1172.6  | 916.2   | 1335.9   | 1198.9   | 1238.5   | 945.1    | 1683.7        | 1198.9     | 0.7         |
| 224912_at    | TTC7A       | 1.89E-03 | 3025.6     | 3168.9     | 2487.0     | 2921.0      | 2477.0      | 2531.5      | 2213.3      | 2325.0  | 1983.0  | 888.5   | 1857.1   | 1703.7   | 1780.1   | 1242.1   | 2531.5        | 1780.1     | 0.7         |
| 224923_at    | TTC7A       | 6.07E-03 | 532.1      | 486.3      | 479.3      | 512.8       | 414.9       | 415.3       | 379.2       | 444.9   | 296.6   | 203.8   | 355.8    | 357.8    | 325.3    | 247.5    | 479.3         | 325.3      | 0.7         |
| 205652_s_at  | TLL1        | 4.26E-03 | 126.3      | 145.1      | 163.4      | 148.8       | 164.8       | 162.5       | 145.9       | 132.4   | 88.6    | 60.9    | 94.3     | 106.6    | 97.5     | 70.5     | 148.8         | 94.3       | 0.6         |
| 213266_at    | TUBGCP4     | 3.55E-03 | 116.9      | 104.2      | 120.3      | 134.4       | 129.2       | 141.6       | 159.9       | 104.5   | 84.1    | 64.4    | 104.2    | 80.5     | 92.9     | 80.3     | 129.2         | 84.1       | 0.7         |
| 224170_s_at  | TULP4       | 2.64E-03 | 78.6       | 82.8       | 79.5       | 66.7        | 78.3        | 101.1       | 66.4        | 59.5    | 48.5    | 58.4    | 50.2     | 65.3     | 65.1     | 54.6     | 78.6          | 58.4       | 0.7         |
| 218184_at    | TULP4       | 6.45E-04 | 522.5      | 603.1      | 566.8      | 540.5       | 673.3       | 692.1       | 534.7       | 443.2   | 321.8   | 319.4   | 390.8    | 330.2    | 373.4    | 306.5    | 566.8         | 330.2      | 0.6         |
| 203246_s_at  | TUSC4       | 5.70E-03 | 431.2      | 413.6      | 465.7      | 441.7       | 403.3       | 401.6       | 353.6       | 393.7   | 259.6   | 193.4   | 327.0    | 296.8    | 299.6    | 229.7    | 413.6         | 296.8      | 0.7         |
| 217684_at    | TYMS        | 9.55E-03 | 87.0       | 88.4       | 199.8      | 121.4       | 98.0        | 99.3        | 105.8       | 74.2    | 69.4    | 99.7    | 96.3     | 75.3     | 87.5     | 71.2     | 99.3          | 75.3       | 0.8         |
| 238462_at    | UBASH3B     | 6.46E-03 | 339.7      | 394.8      | 382.5      | 464.6       | 347.3       | 298.8       | 488.7       | 375.4   | 240.7   | 132.3   | 308.7    | 232.9    | 159.2    | 215.4    | 382.5         | 232.9      | 0.6         |
| 228359_at    | UBASH3B     | 1.81E-03 | 1252.1     | 1285.4     | 830.7      | 1009.7      | 768.2       | 790.9       | 1081.1      | 964.8   | 572.6   | 248.4   | 616.9    | 485.6    | 554.8    | 450.3    | 1009.7        | 554.8      | 0.5         |
| 238587_at    | UBASH3B     | 2.68E-03 | 747.2      | 882.7      | 586.5      | 661.6       | 522.7       | 508.3       | 833.8       | 595.4   | 353.9   | 120.5   | 410.4    | 281.3    | 307.2    | 340.5    | 661.6         | 340.5      | 0.5         |
| 1557053_s_at | UBE2G2      | 8.24E-03 | 1878.2     | 2237.5     | 2522.6     | 2582.6      | 2246.5      | 2722.7      | 2636.2      | 1826.1  | 1920.2  | 1782.4  | 2100.5   | 1496.3   | 2005.4   | 1869.9   | 2522.6        | 1869.9     | 0.7         |
| 223014_at    | UBE2R2      | 1.37E-03 | 2373.0     | 2181.3     | 2519.7     | 2213.1      | 2542.0      | 2687.9      | 2151.9      | 1849.8  | 1808.0  | 1625.1  | 1603.5   | 1826.0   | 1760.4   | 1617.4   | 2373.0        | 1760.4     | 0.7         |
| 218521_s_at  | UBE2W       | 8.91E-03 | 390.9      | 431.4      | 829.9      | 795.5       | 632.5       | 844.4       | 672.7       | 403.8   | 393.9   | 484.8   | 549.2    | 386.5    | 456.5    | 453.4    | 672.7         | 453.4      | 0.7         |
| 202038_at    | UBE4A       | 3.53E-03 | 2002.6     | 2272.8     | 2413.2     | 2653.9      | 2531.7      | 2764.6      | 2455.9      | 1697.2  | 1906.0  | 1741.0  | 2230.5   | 1764.3   | 1741.0   | 1635.8   | 2455.9        | 1741.0     | 0.7         |
| 210685_s_at  | UBE4B       | 7.79E-03 | 246.0      | 258.6      | 296.3      | 282.6       | 271.5       | 287.7       | 247.9       | 261.4   | 176.8   | 154.1   | 209.6    | 205.9    | 187.3    | 168.3    | 271.5         | 187.3      | 0.7         |
| 202317_s_at  | UBE4B       | 2.75E-03 | 1490.7     | 1627.8     | 1680.6     | 1590.1      | 1672.3      | 1664.7      | 1556.5      | 1351.7  | 1042.7  | 712.2   | 1227.3   | 985.2    | 1064.2   | 954.6    | 1627.8        | 1042.7     | 0.6         |
| 226746_s_at  | UBE4B       | 1.55E-03 | 564.0      | 575.9      | 571.3      | 567.8       | 511.9       | 570.0       | 450.6       | 474.1   | 403.7   | 279.8   | 413.9    | 359.7    | 304.0    | 286.7    | 567.8         | 359.7      | 0.6         |
| 1555888_at   | UBR5        | 9.18E-03 | 64.1       | 78.6       | 141.6      | 123.0       | 104.9       | 177.4       | 105.7       | 71.0    | 52.2    | 78.9    | 89.1     | 79.2     | 76.9     | 62.4     | 105.7         | 76.9       | 0.7         |
| 208884_s_at  | UBR5        | 9.60E-03 | 703.3      | 830.4      | 1101.9     | 1094.7      | 1065.2      | 1394.4      | 814.8       | 640.8   | 719.6   | 770.9   | 888.0    | 690.6    | 751.7    | 664.1    | 1065.2        | 719.6      | 0.7         |
| 225982_at    | UBTF        | 7.14E-03 | 193.6      | 195.6      | 182.1      | 213.8       | 207.4       | 210.8       | 189.3       | 161.3   | 179.8   | 146.1   | 168.7    | 162.3    | 145.7    | 146.4    | 195.6         | 161.3      | 0.8         |
| 213100_at    | UNC5B       | 6.16E-03 | 162.6      | 159.3      | 215.1      | 286.8       | 232.7       | 290.7       | 244.3       | 169.6   | 95.6    | 84.6    | 204.1    | 166.0    | 179.4    | 109.5    | 232.7         | 166.0      | 0.7         |
| 41856_at     | UNC5B       | 1.76E-03 | 277.5      | 250.8      | 265.7      | 405.9       | 343.0       | 379.1       | 335.6       | 235.9   | 156.4   | 134.9   | 271.4    | 262.3    | 277.2    | 180.2    | 335.6         | 235.9      | 0.7         |
| 226899_at    | UNC5B       | 4.02E-03 | 284.0      | 317.1      | 276.8      | 462.9       | 462.8       | 493.8       | 456.5       | 296.2   | 149.2   | 122.2   | 343.3    | 300.9    | 283.0    | 202.7    | 456.5         | 283.0      | 0.6         |
| 208970_s_at  | UROD        | 7.46E-03 | 4312.9     | 4446.7     | 3645.6     | 4374.1      | 3620.1      | 4222.6      | 3458.7      | 3764.0  | 3575.8  | 2617.9  | 3716.0   | 2763.4   | 3569.4   | 2773.8   | 4222.6        | 3569.4     | 0.8         |
| 226567_at    | USP14       | 7.33E-03 | 1189.5     | 1222.1     | 1203.2     | 1180.7      | 1322.8      | 1469.0      | 1229.1      | 1162.8  | 960.1   | 833.6   | 911.1    | 909.4    | 1105.6   | 1002.2   | 1222.1        | 960.1      | 0.8         |
| 226652_at    | USP3        | 5.86E-03 | 808.1      | 698.3      | 661.8      | 773.3       | 744.2       | 849.3       | 772.1       | 763.7   | 474.5   | 361.6   | 596.2    | 595.6    | 644.1    | 540.1    | 772.1         | 595.6      | 0.8         |
| 220079_s_at  | USP48       | 2.50E-03 | 720.6      | 1100.7     | 1000.0     | 995.8       | 1068.7      | 1003.2      | 839.4       | 679.9   | 688.9   | 504.4   | 814.7    | 580.1    | 542.9    | 488.7    | 1000.0        | 580.1      | 0.6         |
| 213480_at    | VAMP4       | 4.67E-03 | 318.2      | 399.0      | 385.7      | 441.5       | 467.1       | 421.9       | 412.9       | 291.9   | 269.7   | 301.5   | 368.9    | 248.9    | 224.7    | 258.7    | 412.9         | 269.7      | 0.7         |
| 202546_at    | VAMP8       | 2.66E-03 | 8623.0     | 8548.4     | 8918.2     | 9784.4      | 8136.0      | 7953.0      | 7389.7      | 6718.4  | 6777.7  | 5548.6  | 7187.7   | 6704.7   | 6430.3   | 5122.2   | 8548.4        | 6704.7     | 0.8         |
| 230546_at    | VASH1       | 2.12E-03 | 1143.6     | 1358.8     | 1068.8     | 1313.8      | 1239.8      | 1095.2      | 958.2       | 946.0   | 751.7   | 491.7   | 1078.7   | 751.2    | 708.9    | 673.5    | 1143.6        | 751.2      | 0.7         |
| 208626_s_at  | VAT1        | 2.52E-03 | 4779.4     | 4369.0     | 4688.7     | 4420.0      | 4645.1      | 3892.6      | 3802.8      | 3893.4  | 3271.9  | 2769.2  | 3187.0   | 3540.8   | 3273.2   | 2549.3   | 4420.0        | 3271.9     | 0.7         |
| 226063_at    | VAV2        | 8.10E-03 | 265.2      | 281.2      | 332.3      | 307.6       | 332.8       | 308.7       | 275.7       | 226.4   | 246.2   | 213.7   | 243.7    | 182.5    | 261.2    | 199.6    | 307.6         | 226.4      | 0.7         |
| 200931_s_at  | VCL         | 4.32E-03 | 360.5      | 429.8      | 714.0      | 278.3       | 391.6       | 563.3       | 568.8       | 330.4   | 289.0   | 305.0   | 224.9    | 275.0    | 282.6    | 260.4    | 429.8         | 282.6      | 0.7         |
| 225483_at    | VPS26B      | 7.12E-03 | 226.4      | 252.5      | 278.2      | 275.3       | 286.6       | 278.7       | 245.2       | 229.2   | 169.2   | 158.4   | 213.0    | 203.9    | 218.6    | 129.6    | 275.3         | 203.9      | 0.7         |
| 233864_s_at  | VPS35       | 9.63E-03 | 1049.2     | 1052.7     | 1125.9     | 1318.6      | 1174.5      | 1215.3      | 1297.4      | 1024.9  | 878.6   | 897.8   | 989.0    | 941.4    | 901.3    | 923.7    | 1174.5        | 923.7      | 0.8         |
| 222478_at    | VPS36       | 6.30E-03 | 230.9      | 307.4      | 353.7      | 399.7       | 297.7       | 426.9       | 348.1       | 239.7   | 244.0   | 206.5   | 312.6    | 166.7    | 225.5    | 194.3    | 348.1         | 225.5      | 0.6         |
| 209268_at    | VPS45       | 8.53E-03 | 488.8      | 621.6      | 622.4      | 640.6       | 708.9       | 652.2       | 579.1       | 547.5   | 395.6   | 368.7   | 496.0    | 486.6    | 460.4    | 337.4    | 622.4         | 460.4      | 0.7         |
| 209553_at    | VPS8        | 6.95E-03 | 297.7      | 381.6      | 632.4      | 517.5       | 556.0       | 652.6       | 447.1       | 354.1   | 228.2   | 309.6   | 377.4    | 341.1    | 351.4    | 214.5    | 517.5         | 341.1      | 0.7         |
| 203856_at    | VRK1        | 3.63E-03 | 546.8      | 497.9      | 550.0      | 646.1       | 579.7       | 606.5       | 557.4       | 468.4   | 443.6   | 398.8   | 487.0    | 382.9    | 440.3    | 395.9    | 557.4         | 440.3      | 0.8         |
| 204787_at    | VSIG4       | 6.97E-03 | 7608.0     | 8346.5     | 7469.3     | 8394.7      | 8296.9      | 8517.5      | 7416.2      | 7098.6  | 6125.9  | 4775.8  | 6408.8   | 7285.0   | 6649.2   | 4880.8   | 8296.9        | 6408.8     | 0.8         |
| 209452_s_at  | VTI1B       | 9.17E-03 | 3880.8     | 3704.0     | 3610.0     | 3676.3      | 3712.9      | 3524.0      | 3304.1      | 3079.7  | 3147.3  | 2985.9  | 2828.2   | 3018.8   | 2997.4   | 2848.5   | 3676.3        | 2997.4     | 0.8         |
| 205011_at    | VWA5A       | 6.53E-04 | 674.2      | 556.2      | 622.1      | 718.8       | 563.3       | 527.7       | 791.9       | 553.7   | 314.8   | 329.0   | 492.1    | 344.1    | 380.3    | 480.3    | 622.1         | 380.3      | 0.6         |
| 227490_at    | WDFY2       | 3.09E-03 | 218.8      | 220.7      | 229.2      | 270.9       | 244.0       | 260.8       | 241.8       | 185.1   | 153.8   | 105.0   | 198.8    | 181.7    | 190.4    | 132.4    | 241.8         | 181.7      | 0.8         |
| 229597_s_at  | WDFY4       | 1.54E-03 | 784.3      | 686.7      | 680.4      | 801.8       | 735.5       | 688.1       | 653.6       | 589.9   | 458.9   | 398.9   | 528.4    | 580.2    | 546.9    | 503.9    | 688.1         | 528.4      | 0.8         |
| 218512_at    | WDR12       | 8.34E-03 | 251.1      | 313.2      | 355.2      | 373.2       | 297.0       | 341.2       | 376.4       | 265.7   | 191.8   | 241.2   | 332.2    | 189.8    | 186.6    | 207.1    | 341.2         | 207.1      | 0.6         |
| 211383_s_at  | WDR37       | 4.61E-03 | 1495.7     | 1449.5     | 1667.3     | 1696.4      | 1470.0      | 1841.3      | 1478.8      | 1352.4  | 1140.9  | 883.4   | 1419.5   | 919.5    | 1025.0   | 1038.3   | 1495.7        | 1038.3     | 0.7         |
| 217734_s_at  | WDR6        | 3.37E-03 | 6736.2     | 5121.1     | 4191.1     | 6155.2      | 3873.5      | 6907.0      | 7192.8      | 5193.0  | 3646.8  | 2238.8  | 4506.6   | 3031.7   | 5744.1   | 5486.2   | 6155.2        | 4506.6     | 0.7         |
| 214061_at    | WDR67       | 9.73E-03 | 362.0      | 569.9      | 624.7      | 549.3       | 466.6       | 555.4       | 472.4       | 363.5   | 451.0   | 370.7   | 421.8    | 360.5    | 344.5    | 375.1    | 549.3         | 370.7      | 0.7         |
| 212880_at    | WDR7        | 7.93E-03 | 320.0      | 547.8      | 467.3      | 488.9       | 480.7       | 509.1       | 439.1       | 363.5   | 323.9   | 273.7   | 381.6    | 325.8    | 298.3    | 282.1    | 480.7         | 323.9      | 0.7         |
| 201421_s_at  | WDR77       | 3.93E-03 | 1273.4     | 1254.1     | 1382.0     | 1313.9      | 1150.0      | 1240.6      | 1196.9      | 1009.4  | 974.1   | 759.6   | 1068.8   | 945.7    | 930.8    | 801.3    | 1254.1        | 945.7      | 0.8         |
| 226738_at    | WDR81       | 8.90E-03 | 534.9      | 484.3      | 533.9      | 570.5       | 492.3       | 485.2       | 418.1       | 453.9   | 302.1   | 283.9   | 421.0    | 450.7    | 426.0    | 278.0    | 492.3         | 421.0      | 0.9         |
| 218971_s_at  | WDR91       | 1.73E-03 | 323.3      | 255.0      | 395.8      | 271.8       | 300.9       | 360.8       | 267.1       | 265.6   | 188.4   | 175.7   | 184.1    | 209.1    | 193.0    | 123.1    | 300.9         | 188.4      | 0.6         |
| 226668_at    | WDSUB1      | 6.01E-03 | 793.8      | 782.0      | 954.6      | 884.6       | 847.6       | 801.0       | 788.6       | 674.2   | 670.0</ |         |          |          |          |          |               |            |             |

TRANSCRIPTION PROFILES IN ALVEOLAR MACROPHAGES

Supplementary Table S2. Continued.

| ID           | Gene Symbol | p-value  | VW3_Saline | VW6_Saline | VW7_Saline | VW13_Saline | VW22_Saline | VW23_Saline | VW25_Saline | VW3_LPS | VW6_LPS | VW7_LPS | VW13_LPS | VW22_LPS | VW23_LPS | VW25_LPS | Median_saline | Median_LPS | Fold change |
|--------------|-------------|----------|------------|------------|------------|-------------|-------------|-------------|-------------|---------|---------|---------|----------|----------|----------|----------|---------------|------------|-------------|
| 229060_at    | YPEL2       | 5.95E-03 | 193.7      | 184.5      | 187.6      | 194.8       | 224.1       | 230.0       | 156.5       | 172.7   | 138.3   | 70.4    | 138.7    | 173.1    | 129.1    | 67.7     | 193.7         | 138.3      | 0.7         |
| 201020_at    | YWHAH       | 2.09E-03 | 2446.0     | 2840.5     | 2112.6     | 2527.4      | 2186.9      | 2628.1      | 2408.4      | 2106.7  | 2089.1  | 1275.4  | 2022.7   | 1644.1   | 1785.4   | 1606.3   | 2446.0        | 1785.4     | 0.7         |
| 224711_at    | YY1         | 6.54E-04 | 609.4      | 657.2      | 616.1      | 653.1       | 722.0       | 655.6       | 627.8       | 511.9   | 392.7   | 375.5   | 464.2    | 450.4    | 463.1    | 391.0    | 653.1         | 450.4      | 0.7         |
| 224718_at    | YY1         | 7.23E-03 | 625.7      | 733.8      | 723.3      | 684.1       | 807.3       | 782.5       | 652.5       | 638.4   | 464.7   | 364.3   | 475.0    | 634.4    | 563.2    | 466.4    | 723.3         | 475.0      | 0.7         |
| 227977_at    | ZADH2       | 3.30E-03 | 130.7      | 177.7      | 144.6      | 178.3       | 129.6       | 171.0       | 140.7       | 131.6   | 88.9    | 75.8    | 131.9    | 90.3     | 103.5    | 75.5     | 144.6         | 90.3       | 0.6         |
| 1554239_s_at | ZADH2       | 3.48E-03 | 521.6      | 571.8      | 504.5      | 654.4       | 474.6       | 607.4       | 565.5       | 510.7   | 390.6   | 268.8   | 498.8    | 323.0    | 309.7    | 340.5    | 565.5         | 340.5      | 0.6         |
| 227049_at    | ZADH2       | 9.74E-03 | 125.6      | 188.2      | 162.5      | 212.0       | 155.7       | 212.6       | 195.5       | 146.6   | 122.1   | 54.8    | 151.5    | 103.0    | 92.5     | 75.0     | 188.2         | 103.0      | 0.5         |
| 226255_at    | ZBTB33      | 1.61E-03 | 971.4      | 1185.3     | 1786.2     | 1498.3      | 1544.6      | 1667.1      | 1320.9      | 819.4   | 887.6   | 1104.3  | 1216.4   | 892.9    | 1011.3   | 788.1    | 1498.3        | 892.9      | 0.6         |
| 227047_x_at  | ZBTB4       | 3.94E-03 | 256.6      | 269.4      | 357.4      | 289.0       | 338.0       | 367.5       | 294.4       | 257.3   | 168.6   | 181.8   | 209.6    | 253.0    | 211.7    | 185.8    | 294.4         | 209.6      | 0.7         |
| 225629_s_at  | ZBTB4       | 8.51E-04 | 6430.7     | 6766.5     | 7174.8     | 7104.7      | 7443.1      | 7630.6      | 7250.7      | 5065.3  | 5285.4  | 3617.4  | 4368.2   | 5058.1   | 4558.3   | 4566.2   | 7174.8        | 4566.2     | 0.6         |
| 203959_s_at  | ZBTB40      | 8.53E-03 | 494.1      | 518.8      | 512.9      | 553.3       | 531.3       | 552.0       | 503.5       | 435.3   | 364.0   | 353.2   | 460.4    | 382.7    | 471.9    | 441.9    | 518.8         | 435.3      | 0.8         |
| 1554470_s_at | ZBTB44      | 7.98E-03 | 243.0      | 339.1      | 395.8      | 411.8       | 437.3       | 479.7       | 392.2       | 301.6   | 237.6   | 186.7   | 265.8    | 234.5    | 258.8    | 195.8    | 395.8         | 237.6      | 0.6         |
| 226148_at    | ZBTB44      | 9.35E-03 | 692.8      | 923.2      | 1183.4     | 965.3       | 1246.0      | 1487.3      | 1182.8      | 722.9   | 718.4   | 630.5   | 840.8    | 575.2    | 653.1    | 622.6    | 1182.8        | 653.1      | 0.6         |
| 226500_at    | ZBTB47      | 3.53E-03 | 254.5      | 235.1      | 183.3      | 222.7       | 191.3       | 193.6       | 168.2       | 193.4   | 145.6   | 95.8    | 166.2    | 154.8    | 147.4    | 138.3    | 193.6         | 147.4      | 0.8         |
| 227782_at    | ZBTB7C      | 3.37E-03 | 161.0      | 148.6      | 178.6      | 179.4       | 148.8       | 97.6        | 118.6       | 179.2   | 96.4    | 82.2    | 104.9    | 82.2     | 49.2     | 67.1     | 148.8         | 82.2       | 0.6         |
| 235142_at    | ZBTB8A      | 6.58E-03 | 94.0       | 80.5       | 150.6      | 136.0       | 135.8       | 110.9       | 121.2       | 99.7    | 52.3    | 88.8    | 101.6    | 64.1     | 79.1     | 54.0     | 121.2         | 79.1       | 0.7         |
| 223107_s_at  | ZCCHC17     | 2.65E-03 | 656.7      | 668.7      | 569.8      | 589.5       | 625.5       | 601.7       | 532.1       | 564.0   | 468.2   | 375.2   | 426.5    | 498.2    | 484.0    | 399.2    | 601.7         | 468.2      | 0.8         |
| 212423_at    | ZCCHC24     | 6.26E-03 | 151.2      | 175.4      | 189.8      | 241.1       | 135.1       | 156.4       | 127.4       | 160.6   | 109.7   | 74.2    | 137.0    | 103.7    | 99.7     | 68.5     | 156.4         | 103.7      | 0.7         |
| 212419_at    | ZCCHC24     | 3.93E-03 | 355.1      | 422.2      | 459.1      | 631.7       | 321.6       | 398.2       | 262.2       | 353.4   | 204.3   | 127.2   | 330.6    | 218.3    | 225.5    | 132.2    | 398.2         | 218.3      | 0.5         |
| 225394_s_at  | ZCRB1       | 7.32E-03 | 2690.0     | 2415.1     | 2448.1     | 2761.3      | 2466.9      | 2910.4      | 2511.9      | 2144.0  | 1984.4  | 2081.0  | 2184.3   | 1966.9   | 2469.7   | 2064.8   | 2511.9        | 2081.0     | 0.8         |
| 221646_s_at  | ZDHHHC11    | 4.54E-03 | 2052.5     | 1131.2     | 333.1      | 278.6       | 491.9       | 475.8       | 115.5       | 1443.7  | 344.2   | 135.2   | 105.5    | 435.6    | 359.1    | 68.9     | 475.8         | 344.2      | 0.7         |
| 243786_at    | ZDHHHC20    | 3.98E-03 | 1884.5     | 1886.6     | 1612.1     | 1986.1      | 1731.0      | 1976.5      | 1413.3      | 1687.5  | 1404.0  | 1199.5  | 1558.6   | 1216.6   | 1435.4   | 1178.2   | 1884.5        | 1404.0     | 0.7         |
| 202456_s_at  | ZER1        | 9.44E-03 | 327.6      | 282.7      | 368.8      | 322.0       | 359.2       | 378.4       | 287.7       | 267.0   | 173.7   | 204.4   | 229.5    | 324.4    | 306.6    | 252.5    | 327.6         | 252.5      | 0.8         |
| 226137_at    | ZFHX3       | 8.24E-04 | 775.2      | 693.1      | 761.3      | 937.5       | 992.4       | 1009.9      | 862.9       | 588.9   | 491.7   | 614.9   | 614.7    | 606.3    | 677.1    | 711.3    | 862.9         | 606.3      | 0.7         |
| 222407_s_at  | ZFP106      | 8.28E-04 | 420.6      | 344.8      | 403.0      | 427.7       | 473.6       | 426.7       | 476.1       | 334.0   | 218.0   | 282.6   | 332.2    | 330.2    | 301.1    | 289.3    | 426.7         | 301.1      | 0.7         |
| 217781_s_at  | ZFP106      | 1.78E-03 | 1080.9     | 1088.5     | 1378.6     | 1309.7      | 1433.1      | 1664.5      | 1440.9      | 921.2   | 736.1   | 850.4   | 1100.3   | 761.3    | 978.7    | 924.1    | 1378.6        | 921.2      | 0.7         |
| 201368_at    | ZFP36L2     | 6.95E-03 | 3549.1     | 3725.3     | 4182.9     | 3861.7      | 3757.6      | 4124.8      | 3233.4      | 3085.2  | 3092.7  | 2026.6  | 3171.8   | 2761.5   | 2840.5   | 2244.3   | 3757.6        | 2840.5     | 0.8         |
| 227796_at    | ZFP62       | 2.73E-03 | 710.1      | 726.5      | 1130.7     | 947.6       | 830.6       | 1149.3      | 917.5       | 649.5   | 571.5   | 724.8   | 733.6    | 469.6    | 695.1    | 568.8    | 917.5         | 649.5      | 0.7         |
| 225843_at    | ZFYVE19     | 6.33E-03 | 249.5      | 232.7      | 285.3      | 249.8       | 249.6       | 246.4       | 212.1       | 209.8   | 192.1   | 190.7   | 180.7    | 198.7    | 221.8    | 131.5    | 249.5         | 192.1      | 0.8         |
| 224445_s_at  | ZFYVE21     | 1.75E-03 | 793.4      | 834.5      | 922.0      | 881.4       | 835.6       | 1163.0      | 814.8       | 686.1   | 605.2   | 460.7   | 631.3    | 548.4    | 627.6    | 379.7    | 835.6         | 605.2      | 0.7         |
| 37943_at     | ZFYVE26     | 3.36E-03 | 852.5      | 1059.4     | 1311.1     | 1289.5      | 1121.3      | 1544.1      | 1080.1      | 834.1   | 708.3   | 817.8   | 840.7    | 727.4    | 638.5    | 657.8    | 1121.3        | 727.4      | 0.6         |
| 213073_at    | ZFYVE26     | 7.81E-04 | 2461.6     | 2795.6     | 2959.8     | 2844.1      | 2694.3      | 3372.7      | 2329.4      | 2051.6  | 1811.1  | 1629.8  | 1777.4   | 1641.6   | 1496.3   | 1517.4   | 2795.6        | 1641.6     | 0.6         |
| 212545_s_at  | ZHX3        | 4.25E-03 | 80.9       | 72.7       | 71.7       | 66.3        | 71.1        | 64.5        | 64.4        | 52.1    | 53.6    | 60.4    | 46.1     | 59.3     | 54.6     | 49.7     | 71.1          | 53.6       | 0.8         |
| 1562305_x_at | ZKSCAN3     | 2.27E-03 | 135.9      | 164.7      | 183.4      | 152.3       | 147.0       | 192.1       | 138.6       | 132.4   | 115.9   | 110.9   | 107.5    | 75.9     | 107.5    | 76.6     | 152.3         | 107.5      | 0.7         |
| 219628_at    | ZMAT3       | 8.63E-03 | 333.7      | 522.6      | 614.8      | 489.5       | 497.4       | 592.3       | 457.4       | 347.3   | 330.6   | 299.2   | 449.2    | 330.4    | 323.0    | 219.8    | 497.4         | 330.4      | 0.7         |
| 212124_at    | ZMZ1        | 8.84E-03 | 1938.7     | 1839.4     | 1800.4     | 2285.9      | 2355.1      | 1919.7      | 2173.5      | 2002.4  | 1117.6  | 1018.8  | 1808.7   | 1604.3   | 1567.8   | 1526.6   | 1938.7        | 1567.8     | 0.8         |
| 1554172_a_at | ZMYM3       | 5.89E-03 | 82.5       | 74.0       | 91.1       | 84.4        | 91.9        | 91.8        | 77.8        | 72.4    | 42.5    | 47.9    | 64.6     | 75.6     | 55.8     | 65.6     | 84.4          | 64.6       | 0.8         |
| 1554171_at   | ZMYM3       | 1.60E-03 | 211.2      | 295.5      | 280.4      | 248.4       | 285.8       | 239.7       | 269.2       | 181.6   | 150.4   | 104.4   | 176.6    | 190.8    | 110.6    | 138.9    | 269.2         | 150.4      | 0.6         |
| 219925_at    | ZMYM6       | 1.41E-03 | 781.2      | 935.2      | 914.7      | 811.7       | 831.8       | 985.5       | 724.7       | 660.3   | 609.1   | 498.3   | 653.6    | 523.7    | 523.1    | 473.9    | 831.8         | 523.7      | 0.6         |
| 202136_at    | ZMYND11     | 9.56E-03 | 1310.3     | 1262.5     | 1457.6     | 1375.1      | 1381.2      | 1442.8      | 1154.5      | 1173.4  | 1068.7  | 1058.1  | 1156.2   | 1070.9   | 1118.8   | 980.3    | 1375.1        | 1070.9     | 0.8         |
| 235408_x_at  | ZNF117      | 3.51E-03 | 155.0      | 154.8      | 154.3      | 250.9       | 231.3       | 412.9       | 320.9       | 132.5   | 110.2   | 103.5   | 167.8    | 156.1    | 160.8    | 131.7    | 231.3         | 132.5      | 0.6         |
| 235166_at    | ZNF148      | 1.75E-03 | 72.4       | 86.9       | 86.7       | 109.8       | 103.3       | 113.3       | 97.6        | 63.4    | 67.7    | 61.3    | 67.5     | 71.6     | 80.8     | 69.3     | 97.6          | 67.7       | 0.7         |
| 230821_at    | ZNF148      | 5.71E-03 | 91.8       | 108.7      | 146.0      | 133.3       | 156.4       | 171.7       | 151.6       | 76.8    | 85.5    | 81.2    | 116.3    | 119.7    | 86.5     | 74.5     | 146.0         | 85.5       | 0.6         |
| 219314_s_at  | ZNF219      | 5.66E-03 | 165.8      | 127.0      | 197.2      | 207.6       | 176.1       | 172.5       | 159.1       | 132.1   | 102.8   | 117.7   | 128.5    | 119.9    | 130.1    | 151.3    | 172.5         | 128.5      | 0.7         |
| 219123_at    | ZNF232      | 3.10E-03 | 211.4      | 206.0      | 273.7      | 194.8       | 224.2       | 225.4       | 199.1       | 179.3   | 147.1   | 128.1   | 122.0    | 192.8    | 134.7    | 128.2    | 211.4         | 134.7      | 0.6         |
| 236328_at    | ZNF285A     | 1.88E-03 | 178.3      | 192.3      | 187.5      | 198.0       | 208.7       | 220.5       | 175.3       | 145.6   | 155.8   | 121.7   | 157.2    | 120.2    | 152.1    | 108.2    | 192.3         | 145.6      | 0.8         |
| 219228_at    | ZNF331      | 8.20E-04 | 473.1      | 640.8      | 492.9      | 480.4       | 505.9       | 472.4       | 399.1       | 381.9   | 380.9   | 289.5   | 314.5    | 388.2    | 341.9    | 241.2    | 480.4         | 341.9      | 0.7         |
| 231864_at    | ZNF33A      | 6.36E-03 | 306.1      | 419.8      | 449.9      | 431.8       | 476.2       | 562.3       | 407.5       | 310.2   | 287.5   | 241.1   | 355.2    | 343.7    | 289.9    | 206.2    | 431.8         | 289.9      | 0.7         |
| 226820_at    | ZNF362      | 4.56E-03 | 406.9      | 510.1      | 648.6      | 547.4       | 546.0       | 588.6       | 488.3       | 411.6   | 336.5   | 223.4   | 368.5    | 350.5    | 299.4    | 221.6    | 546.0         | 336.5      | 0.6         |
| 1570121_at   | ZNF365      | 2.68E-03 | 166.6      | 238.8      | 355.0      | 331.8       | 228.6       | 385.3       | 181.6       | 143.6   | 159.4   | 52.2    | 148.6    | 74.0     | 129.0    | 45.6     | 238.8         | 129.0      | 0.5         |
| 229551_x_at  | ZNF367      | 9.02E-03 | 79.8       | 74.6       | 74.5       | 120.8       | 68.2        | 56.1        | 80.9        | 80.9    | 50.8    | 47.6    | 88.4     | 24.0     | 40.6     | 41.2     | 74.6          | 47.6       | 0.6         |
| 1559988_at   | ZNF483      | 2.44E-03 | 121.5      | 137.1      | 246.9      | 152.4       | 206.8       | 387.7       | 177.0       | 80.7    | 68.4    | 61.1    | 118.0    | 132.1    | 103.0    | 71.8     | 177.0         | 80.7       | 0.5         |
| 225050_at    | ZNF512      | 6.12E-03 | 298.5      | 273.6      | 403.2      | 362.3       | 358.1       | 397.9       | 354.2       | 268.8   | 245.4   | 270.1   | 279.6    | 180.1    | 196.7    | 210.8    | 358.1         | 245.4      | 0.7         |
| 203604_at    | ZNF516      | 5.40E-03 | 185.9      | 161.3      | 176.9      | 145.3       | 200.8       | 203.6       | 176.0       | 156.3   | 121.8   | 156.3   | 109.7    | 139.2    | 158.4    | 145.1    | 176.9         | 145.1      | 0.8         |
| 242697_at    | ZNF540      | 6.21E-03 | 64.7       | 53.5       | 66.2       | 55.4        | 62.4        | 93.4        | 56.6        | 46.5    | 46.2    | 39.3    | 43.0     | 44.1     | 56.2     | 53.5     | 62.4          | 46.2       | 0.7         |
| 219968_at    | ZNF589      | 9.76E-04 | 721.7      | 1170.6     | 973.9      | 689.9       | 679.9       | 930.2       | 673.3       | 479.0   | 472.8   | 150.6   | 322.2    | 343.0    | 356.8    | 150.6    | 721.7         | 343.0      | 0.5         |
| 210062_s_at  | ZNF589      | 8.51E-04 | 1149.7     | 1907.9     | 1329.9     | 923.7       | 966.9       | 1358.8      | 924.8       | 627.8   | 811.8   | 238.2   | 569.5    | 540.2    | 470.4    | 237.5    | 1149.7        | 540.2      | 0.5         |
| 210061_at    | ZNF589      | 8.70E-04 | 600.0      | 880.0      | 682.4      | 447.6       | 457.8       | 649.0       | 465.6       | 408.3   | 312.2   | 140.1   | 240.3    | 270.1    | 253.4    | 119.0    | 600.0         | 253.       |             |

Supplementary Table S2. Continued.

| ID           | Gene Symbol | p-value  | VW3_Saline | VW6_Saline | VW7_Saline | VW13_Saline | VW22_Saline | VW23_Saline | VW25_Saline | VW3_LPS | VW6_LPS | VW7_LPS | VW13_LPS | VW22_LPS | VW23_LPS | VW25_LPS | Median_saline | Median_LPS | Fold change |
|--------------|-------------|----------|------------|------------|------------|-------------|-------------|-------------|-------------|---------|---------|---------|----------|----------|----------|----------|---------------|------------|-------------|
| 244552_at    | ZNF788      | 7.59E-03 | 183.2      | 164.2      | 240.3      | 206.5       | 290.3       | 232.2       | 188.1       | 88.2    | 37.2    | 131.0   | 108.0    | 118.5    | 59.6     | 206.5    | 108.0         | 0.5        |             |
| 238148_s_at  | ZNF818P     | 9.30E-03 | 75.6       | 102.4      | 119.4      | 84.1        | 99.5        | 125.4       | 102.9       | 68.4    | 74.0    | 80.2    | 72.6     | 81.5     | 86.0     | 89.2     | 102.4         | 80.2       | 0.8         |
| 205494_at    | ZNF821      | 9.02E-03 | 76.9       | 72.3       | 97.9       | 97.8        | 86.6        | 93.3        | 77.2        | 64.2    | 65.0    | 72.5    | 80.7     | 56.4     | 71.1     | 66.4     | 86.6          | 66.4       | 0.8         |
| 1569077_x_at | ZNF836      | 2.58E-03 | 396.0      | 441.9      | 637.4      | 387.0       | 457.2       | 492.1       | 456.0       | 363.7   | 327.5   | 297.5   | 278.2    | 289.5    | 285.1    | 285.8    | 456.0         | 289.5      | 0.6         |
| 228719_at    | ZSWIM7      | 7.31E-03 | 1413.6     | 720.6      | 1369.4     | 1332.0      | 1059.6      | 1331.4      | 884.4       | 1293.2  | 464.3   | 917.5   | 1045.7   | 795.5    | 1099.2   | 756.3    | 1331.4        | 917.5      | 0.7         |
| 204026_s_at  | ZWINT       | 3.62E-03 | 416.7      | 460.2      | 610.3      | 610.7       | 479.4       | 463.9       | 611.5       | 403.8   | 342.3   | 307.4   | 428.3    | 179.5    | 201.8    | 272.6    | 479.4         | 307.4      | 0.6         |
| 225350_s_at  | ZYG11B      | 2.49E-03 | 471.4      | 803.5      | 664.7      | 599.7       | 640.5       | 832.0       | 626.7       | 452.1   | 420.5   | 281.7   | 462.2    | 360.7    | 336.9    | 258.1    | 640.5         | 360.7      | 0.6         |
| 239347_at    | —           | 9.68E-03 | 84.3       | 86.0       | 91.2       | 76.5        | 78.8        | 78.5        | 73.6        | 77.8    | 67.2    | 70.2    | 70.2     | 58.3     | 49.1     | 55.2     | 78.8          | 67.2       | 0.9         |
| 226374_at    | —           | 3.93E-03 | 86.3       | 404.0      | 56.4       | 81.8        | 530.4       | 158.2       | 96.8        | 81.2    | 193.8   | 43.6    | 60.2     | 323.6    | 109.1    | 59.4     | 96.8          | 81.2       | 0.8         |
| 1562059_at   | —           | 8.32E-03 | 106.7      | 102.1      | 109.5      | 126.6       | 103.5       | 154.8       | 122.2       | 79.4    | 90.3    | 97.1    | 110.2    | 67.3     | 93.2     | 89.7     | 109.5         | 90.3       | 0.8         |
| 1569478_s_at | —           | 4.93E-03 | 717.3      | 668.6      | 636.6      | 589.6       | 792.3       | 688.6       | 671.8       | 559.2   | 582.4   | 426.2   | 428.6    | 547.9    | 597.2    | 545.7    | 671.8         | 547.9      | 0.8         |
| 229606_at    | —           | 9.00E-03 | 4828.9     | 4366.4     | 4572.3     | 5492.4      | 4589.8      | 4670.1      | 4464.1      | 3940.6  | 3653.0  | 3284.7  | 3939.3   | 3488.9   | 4372.3   | 3737.2   | 4589.8        | 3737.2     | 0.8         |
| 217300_at    | —           | 2.68E-03 | 1188.7     | 999.5      | 982.9      | 1001.6      | 1155.1      | 1009.6      | 937.1       | 916.9   | 814.9   | 671.4   | 862.2    | 865.6    | 758.8    | 668.9    | 1001.6        | 814.9      | 0.8         |
| 213979_s_at  | —           | 9.46E-03 | 4886.8     | 5027.6     | 4695.7     | 5059.7      | 4814.5      | 5137.4      | 4503.9      | 4537.5  | 4114.6  | 3474.7  | 4290.5   | 3536.3   | 3957.5   | 3756.6   | 4886.8        | 3957.5     | 0.8         |
| 227095_at    | —           | 4.05E-03 | 1409.7     | 1545.0     | 1328.5     | 1895.4      | 1528.4      | 1869.0      | 1727.5      | 1251.1  | 1267.2  | 1033.8  | 1526.5   | 1035.5   | 1253.5   | 1085.7   | 1545.0        | 1251.1     | 0.8         |
| 230096_at    | —           | 3.81E-03 | 177.9      | 204.7      | 162.0      | 244.4       | 192.2       | 277.9       | 191.7       | 170.0   | 146.7   | 99.6    | 170.6    | 136.5    | 175.9    | 155.6    | 192.2         | 155.6      | 0.8         |
| 229713_at    | —           | 7.81E-03 | 2795.2     | 3267.1     | 3132.1     | 3189.0      | 3123.2      | 3691.8      | 3110.0      | 2446.0  | 2680.2  | 2297.2  | 2830.8   | 2463.3   | 2751.8   | 2496.1   | 3132.1        | 2496.1     | 0.8         |
| 1556553_at   | —           | 6.36E-03 | 84.6       | 58.4       | 72.1       | 78.5        | 94.4        | 74.3        | 72.7        | 56.0    | 50.8    | 63.0    | 65.5     | 69.3     | 59.1     | 52.0     | 74.3          | 59.1       | 0.8         |
| 241114_s_at  | —           | 2.69E-03 | 305.8      | 225.2      | 263.8      | 419.8       | 523.9       | 391.8       | 313.9       | 315.7   | 138.1   | 176.1   | 264.2    | 346.4    | 247.3    | 193.4    | 313.9         | 247.3      | 0.8         |
| 238944_at    | —           | 6.50E-03 | 213.8      | 253.5      | 268.0      | 246.5       | 304.6       | 425.3       | 443.3       | 197.2   | 207.1   | 150.8   | 208.8    | 218.4    | 294.0    | 251.2    | 268.0         | 208.8      | 0.8         |
| 230967_s_at  | —           | 9.76E-03 | 373.0      | 327.9      | 475.1      | 426.1       | 496.1       | 519.4       | 509.9       | 306.1   | 219.9   | 297.8   | 369.9    | 449.7    | 440.4    | 381.1    | 475.1         | 369.9      | 0.8         |
| 227683_x_at  | —           | 4.33E-03 | 141.9      | 147.1      | 148.5      | 145.1       | 139.2       | 141.7       | 129.6       | 127.7   | 111.6   | 98.4    | 122.2    | 95.3     | 110.3    | 96.3     | 141.9         | 110.3      | 0.8         |
| 230407_at    | —           | 9.51E-03 | 294.3      | 299.8      | 320.8      | 336.3       | 349.1       | 366.1       | 399.3       | 316.0   | 187.0   | 185.7   | 272.3    | 264.7    | 260.9    | 217.4    | 336.3         | 260.9      | 0.8         |
| 229189_s_at  | —           | 7.55E-03 | 130.4      | 124.0      | 157.6      | 120.4       | 120.4       | 260.8       | 133.2       | 126.3   | 84.9    | 87.7    | 101.6    | 100.7    | 155.8    | 76.0     | 130.4         | 100.7      | 0.8         |
| 238517_at    | —           | 6.56E-03 | 103.8      | 107.3      | 99.3       | 115.9       | 132.8       | 141.5       | 108.1       | 109.8   | 64.6    | 46.2    | 93.2     | 88.2     | 83.2     | 70.0     | 108.1         | 83.2       | 0.8         |
| 237627_at    | —           | 4.68E-03 | 153.9      | 296.8      | 191.2      | 177.7       | 166.2       | 272.2       | 292.9       | 140.5   | 220.1   | 135.7   | 145.8    | 120.0    | 194.4    | 158.9    | 191.2         | 145.8      | 0.8         |
| 216112_at    | —           | 7.56E-03 | 83.2       | 112.5      | 110.6      | 122.7       | 110.1       | 149.9       | 116.7       | 63.7    | 93.1    | 81.1    | 117.0    | 57.0     | 86.1     | 85.5     | 112.5         | 85.5       | 0.8         |
| 227121_at    | —           | 8.34E-03 | 78.5       | 56.7       | 61.8       | 72.1        | 88.8        | 113.7       | 96.5        | 66.1    | 41.6    | 46.2    | 69.8     | 62.9     | 59.6     | 49.5     | 78.5          | 59.6       | 0.8         |
| 227221_at    | —           | 7.85E-03 | 357.6      | 468.5      | 638.1      | 448.5       | 563.5       | 565.3       | 428.9       | 354.2   | 349.8   | 366.7   | 409.0    | 318.4    | 363.3    | 273.6    | 468.5         | 354.2      | 0.8         |
| 235379_at    | —           | 9.86E-04 | 122.3      | 135.8      | 99.3       | 132.0       | 86.9        | 100.9       | 72.0        | 84.3    | 92.7    | 63.8    | 86.9     | 67.4     | 76.2     | 58.2     | 100.9         | 76.2       | 0.8         |
| 239734_at    | —           | 6.91E-03 | 94.4       | 72.9       | 63.9       | 72.6        | 88.6        | 107.3       | 74.5        | 52.9    | 77.4    | 47.0    | 56.1     | 61.0     | 56.4     | 45.7     | 74.5          | 56.1       | 0.8         |
| 214148_at    | —           | 5.10E-03 | 82.0       | 87.7       | 99.2       | 98.6        | 91.6        | 97.0        | 93.3        | 72.7    | 55.7    | 71.9    | 90.4     | 51.4     | 70.2     | 63.3     | 93.3          | 70.2       | 0.8         |
| 231101_at    | —           | 8.15E-03 | 227.7      | 278.9      | 348.8      | 293.9       | 328.4       | 376.6       | 293.8       | 253.8   | 175.0   | 248.0   | 221.0    | 228.3    | 215.1    | 156.5    | 293.9         | 221.0      | 0.8         |
| 239632_at    | —           | 9.96E-03 | 66.9       | 85.5       | 63.6       | 72.1        | 83.8        | 91.7        | 78.4        | 58.3    | 52.1    | 43.7    | 67.2     | 58.2     | 63.7     | 70.6     | 78.4          | 58.3       | 0.7         |
| 227959_at    | —           | 3.78E-03 | 79.9       | 83.9       | 49.8       | 62.4        | 48.0        | 57.4        | 57.1        | 67.4    | 51.0    | 24.3    | 54.6     | 33.5     | 33.5     | 42.5     | 57.4          | 42.5       | 0.7         |
| 217549_at    | —           | 2.76E-03 | 304.5      | 244.1      | 265.8      | 303.9       | 296.2       | 279.5       | 291.6       | 242.5   | 184.9   | 161.9   | 221.4    | 252.8    | 215.7    | 213.3    | 291.6         | 215.7      | 0.7         |
| 1558011_at   | —           | 4.83E-03 | 73.4       | 37.1       | 104.4      | 93.5        | 101.1       | 110.2       | 68.9        | 57.6    | 34.0    | 69.2    | 71.5     | 85.7     | 71.9     | 45.1     | 93.5          | 69.2       | 0.7         |
| 226250_at    | —           | 9.87E-03 | 115.8      | 104.6      | 91.0       | 94.6        | 114.3       | 129.6       | 106.9       | 85.6    | 108.4   | 53.0    | 79.0     | 88.2     | 73.2     | 70.6     | 106.9         | 79.0       | 0.7         |
| 222297_x_at  | —           | 5.86E-03 | 72.2       | 71.7       | 86.0       | 90.5        | 81.4        | 100.8       | 96.3        | 45.6    | 62.2    | 78.9    | 64.8     | 61.8     | 63.4     | 75.5     | 86.0          | 63.4       | 0.7         |
| 228457_at    | —           | 6.00E-03 | 69.2       | 62.9       | 59.0       | 62.8        | 71.5        | 62.7        | 50.5        | 49.6    | 53.4    | 31.2    | 38.6     | 55.0     | 45.8     | 46.2     | 62.8          | 46.2       | 0.7         |
| 1555904_at   | —           | 5.45E-03 | 122.0      | 109.9      | 120.6      | 110.7       | 128.1       | 119.2       | 102.6       | 104.1   | 102.3   | 70.0    | 87.5     | 89.3     | 81.5     | 69.7     | 119.2         | 87.5       | 0.7         |
| 236476_at    | —           | 7.21E-03 | 73.6       | 69.2       | 72.8       | 78.4        | 85.3        | 85.5        | 79.4        | 57.5    | 60.5    | 47.8    | 72.5     | 46.4     | 64.4     | 44.4     | 78.4          | 57.5       | 0.7         |
| 235293_at    | —           | 9.48E-03 | 267.5      | 353.9      | 259.5      | 266.8       | 258.5       | 270.7       | 244.8       | 283.0   | 239.7   | 187.2   | 197.3    | 195.8    | 190.9    | 193.0    | 266.8         | 195.8      | 0.7         |
| 229874_x_at  | —           | 8.13E-03 | 1124.2     | 978.3      | 1376.8     | 1283.2      | 1418.6      | 1422.3      | 1474.0      | 1076.9  | 806.8   | 975.2   | 1010.0   | 1097.9   | 1018.8   | 829.3    | 1376.8        | 1010.0     | 0.7         |
| 227897_at    | —           | 2.65E-03 | 4596.9     | 4109.6     | 6073.8     | 5245.4      | 4809.0      | 3802.8      | 4691.3      | 3576.6  | 3353.1  | 3439.3  | 4051.4   | 3912.8   | 2635.6   | 3078.6   | 4691.3        | 3439.3     | 0.7         |
| 233729_at    | —           | 2.43E-03 | 187.1      | 229.9      | 178.0      | 219.4       | 189.4       | 224.5       | 170.0       | 171.8   | 138.4   | 116.8   | 173.9    | 111.5    | 165.3    | 100.9    | 189.4         | 138.4      | 0.7         |
| 229541_at    | —           | 7.21E-03 | 411.8      | 421.8      | 411.0      | 465.9       | 492.0       | 510.7       | 512.1       | 316.3   | 294.5   | 317.0   | 433.2    | 419.2    | 339.5    | 414.7    | 465.9         | 339.5      | 0.7         |
| 228240_at    | —           | 3.52E-03 | 66.5       | 73.9       | 68.4       | 74.7        | 60.6        | 62.3        | 61.0        | 52.4    | 54.4    | 48.4    | 63.5     | 44.8     | 42.7     | 30.2     | 66.5          | 48.4       | 0.7         |
| 235072_s_at  | —           | 2.54E-03 | 998.4      | 1414.3     | 1232.1     | 1105.8      | 1341.6      | 1458.8      | 1035.8      | 895.9   | 1000.3  | 731.1   | 922.6    | 907.0    | 834.3    | 626.5    | 1232.1        | 895.9      | 0.7         |
| 226116_at    | —           | 4.67E-03 | 306.6      | 337.8      | 458.8      | 328.4       | 400.2       | 471.3       | 376.6       | 279.8   | 204.6   | 239.5   | 304.7    | 273.8    | 274.7    | 189.0    | 376.6         | 273.8      | 0.7         |
| 234439_at    | —           | 3.98E-03 | 69.0       | 71.4       | 83.4       | 102.2       | 72.9        | 82.9        | 97.5        | 53.4    | 51.0    | 60.3    | 62.5     | 64.4     | 71.0     | 59.7     | 82.9          | 60.3       | 0.7         |
| 229204_at    | —           | 3.06E-03 | 3012.0     | 3417.9     | 3611.3     | 3619.5      | 3457.0      | 3850.9      | 3314.5      | 2750.2  | 2642.9  | 2404.4  | 2857.2   | 2511.5   | 2397.5   | 2031.5   | 3457.0        | 2511.5     | 0.7         |
| 227805_at    | —           | 4.31E-03 | 112.6      | 117.6      | 134.1      | 117.6       | 133.0       | 106.6       | 103.4       | 92.6    | 100.1   | 85.4    | 88.6     | 62.2     | 75.9     | 71.6     | 117.6         | 85.4       | 0.7         |
| 211976_at    | —           | 2.22E-03 | 988.6      | 1135.7     | 1158.0     | 1287.4      | 1300.9      | 1325.9      | 1193.1      | 864.7   | 846.9   | 645.9   | 946.4    | 936.6    | 946.5    | 842.8    | 1193.1        | 864.7      | 0.7         |
| 1569127_at   | —           | 5.00E-03 | 290.7      | 235.5      | 327.5      | 266.7       | 217.0       | 264.8       | 193.4       | 238.9   | 148.1   | 191.9   | 204.4    | 156.6    | 207.8    | 176.1    | 264.8         | 191.9      | 0.7         |
| 229704_at    | —           | 5.94E-03 | 846.5      | 828.2      | 884.4      | 1051.0      | 838.3       | 862.0       | 803.8       | 750.7   | 730.6   | 551.4   | 872.2    | 612.4    | 540.5    | 571.0    | 846.5         | 612.4      | 0.7         |
| 244661_at    | —           | 9.36E-03 | 1740.7     | 2374.9     | 1987.0     | 2042.7      | 2208.4      | 2317.8      | 2184.1      | 1931.3  | 1659.3  | 1361.2  | 1602.6   | 1577.4   | 1418.3   | 1348.9   | 2184.1        | 1577.4     | 0.7         |
| 230350_at    | —           | 6.74E-03 | 184.2      | 233.3      | 243.4      | 321.2       | 293.4       | 295.4       | 256.8       | 189.4   | 185.2   | 111.5   | 221.9    | 170.3    | 203.1    | 162.5    | 256.8         | 185.2      | 0.7         |
| 239069_s_at  | —           | 7.46E-03 | 160.1      | 244.1      | 162.5      | 179.2       | 203.0       | 239.5       | 154.3       | 151.4   | 131.8   | 118.4   | 157.5    | 128.9    | 92.7     | 81.5     | 179.2         | 128.9      | 0.7         |
| 244343_at    | —           | 1.67E-03 | 57.2       | 56.2       | 49.9       | 63.4        | 83.3        | 50.2        | 65.2        | 32.0    | 41.5    | 41.1    | 41.2     | 64.6     | 27.3     | 4        |               |            |             |



TRANSCRIPTION PROFILES IN ALVEOLAR MACROPHAGES

Supplementary Table S2. Continued.

| ID          | Gene Symbol | p-value  | VW3_Saline | VW6_Saline | VW7_Saline | VW13_Saline | VW22_Saline | VW23_Saline | VW25_Saline | VW3_LPS | VW6_LPS | VW7_LPS | VW13_LPS | VW22_LPS | VW23_LPS | VW25_LPS | Median_saline | Median_LPS | Fold change |
|-------------|-------------|----------|------------|------------|------------|-------------|-------------|-------------|-------------|---------|---------|---------|----------|----------|----------|----------|---------------|------------|-------------|
| 231972_at   | —           | 1.15E-03 | 3912.9     | 3333.5     | 4057.9     | 5048.4      | 4846.8      | 3420.5      | 5798.4      | 2929.0  | 2604.6  | 2981.2  | 2869.4   | 2887.1   | 2655.8   | 3590.9   | 4057.9        | 2887.1     | 0.7         |
| 214176_s_at | —           | 2.68E-03 | 1313.9     | 1700.0     | 1552.2     | 1773.2      | 1613.5      | 1741.4      | 1347.4      | 1208.8  | 1228.2  | 982.5   | 1400.0   | 1147.5   | 1072.1   | 951.7    | 1613.5        | 1147.5     | 0.7         |
| 230293_at   | —           | 3.39E-03 | 70.1       | 57.2       | 66.0       | 60.2        | 75.0        | 62.9        | 74.0        | 60.2    | 36.1    | 46.9    | 52.9     | 37.8     | 34.4     | 49.7     | 66.0          | 46.9       | 0.7         |
| 226252_at   | —           | 6.63E-03 | 96.7       | 79.5       | 99.3       | 106.8       | 142.1       | 155.4       | 133.0       | 87.3    | 61.7    | 62.2    | 99.5     | 80.8     | 75.8     | 69.5     | 106.8         | 75.8       | 0.7         |
| 214857_at   | —           | 4.84E-03 | 362.1      | 744.5      | 510.4      | 388.8       | 477.7       | 387.0       | 292.2       | 326.8   | 399.8   | 208.6   | 254.1    | 380.8    | 275.9    | 196.8    | 388.8         | 275.9      | 0.7         |
| 228389_at   | —           | 9.36E-03 | 101.8      | 88.0       | 142.8      | 137.5       | 141.4       | 133.8       | 142.5       | 97.4    | 76.1    | 101.0   | 119.6    | 98.1     | 93.9     | 95.9     | 137.5         | 97.4       | 0.7         |
| 213755_s_at | —           | 2.56E-03 | 692.3      | 783.3      | 557.1      | 814.5       | 572.0       | 640.6       | 513.9       | 520.0   | 445.9   | 241.8   | 453.3    | 488.8    | 491.0    | 328.1    | 640.6         | 453.3      | 0.7         |
| 240121_x_at | —           | 1.06E-03 | 294.7      | 602.7      | 568.5      | 387.4       | 403.2       | 548.5       | 401.7       | 212.3   | 480.3   | 285.1   | 301.1    | 218.5    | 286.5    | 232.2    | 403.2         | 285.1      | 0.7         |
| 235573_at   | —           | 1.80E-03 | 177.2      | 161.9      | 235.6      | 174.3       | 182.4       | 193.6       | 165.3       | 137.6   | 125.2   | 139.3   | 137.6    | 122.6    | 91.5     | 91.7     | 177.2         | 125.2      | 0.7         |
| 229735_s_at | —           | 1.78E-03 | 516.7      | 558.5      | 487.0      | 522.6       | 509.6       | 532.2       | 455.5       | 449.6   | 364.4   | 235.7   | 390.3    | 340.2    | 370.0    | 260.3    | 516.7         | 364.4      | 0.7         |
| 235213_at   | —           | 4.02E-03 | 68.0       | 48.5       | 85.1       | 82.5        | 73.4        | 76.5        | 54.8        | 66.8    | 36.2    | 51.6    | 60.0     | 39.1     | 51.6     | 38.4     | 73.4          | 51.6       | 0.7         |
| 239300_at   | —           | 5.37E-03 | 72.6       | 76.8       | 88.4       | 97.2        | 100.4       | 96.4        | 95.8        | 71.6    | 38.1    | 39.5    | 74.5     | 72.7     | 67.3     | 52.7     | 95.8          | 67.3       | 0.7         |
| 225923_at   | —           | 4.48E-03 | 162.9      | 169.7      | 219.6      | 251.6       | 232.4       | 197.3       | 268.5       | 147.4   | 106.4   | 127.8   | 212.4    | 154.2    | 162.9    | 168.8    | 219.6         | 154.2      | 0.7         |
| 226377_at   | —           | 1.75E-03 | 252.1      | 212.8      | 304.2      | 301.7       | 313.1       | 283.7       | 283.9       | 234.9   | 129.8   | 155.9   | 206.5    | 206.7    | 199.1    | 173.2    | 283.9         | 199.1      | 0.7         |
| 235902_at   | —           | 6.30E-03 | 613.8      | 326.5      | 584.3      | 601.5       | 508.7       | 482.0       | 373.8       | 457.6   | 274.6   | 355.3   | 514.0    | 444.3    | 284.0    | 278.9    | 508.7         | 355.3      | 0.7         |
| 227191_at   | —           | 6.81E-03 | 69.9       | 70.2       | 94.9       | 91.5        | 101.5       | 109.9       | 108.9       | 65.7    | 52.9    | 80.4    | 72.3     | 54.4     | 66.2     | 68.1     | 94.9          | 66.2       | 0.7         |
| 243972_at   | —           | 8.67E-03 | 89.1       | 78.6       | 134.4      | 131.9       | 146.7       | 147.6       | 135.4       | 83.6    | 56.7    | 99.3    | 127.4    | 93.7     | 98.4     | 83.5     | 134.4         | 93.7       | 0.7         |
| 226742_at   | —           | 2.91E-03 | 536.0      | 604.3      | 733.3      | 727.5       | 726.4       | 843.0       | 764.1       | 479.8   | 477.7   | 517.3   | 585.0    | 505.4    | 537.9    | 500.9    | 727.5         | 505.4      | 0.7         |
| 237845_at   | —           | 4.90E-03 | 44.5       | 57.7       | 68.4       | 66.0        | 70.1        | 75.3        | 66.3        | 36.1    | 40.2    | 52.3    | 61.0     | 46.0     | 60.5     | 40.6     | 66.3          | 46.0       | 0.7         |
| 228309_at   | —           | 2.46E-03 | 4144.4     | 4175.7     | 4199.2     | 4185.9      | 3874.9      | 4505.2      | 4099.5      | 3340.9  | 2820.4  | 1812.8  | 2897.4   | 3018.2   | 3140.5   | 2441.3   | 4175.7        | 2897.4     | 0.7         |
| 238882_at   | —           | 1.78E-03 | 225.6      | 213.8      | 282.4      | 357.2       | 262.4       | 428.6       | 325.8       | 195.8   | 128.1   | 207.8   | 271.3    | 183.8    | 264.3    | 173.7    | 282.4         | 195.8      | 0.7         |
| 243086_at   | —           | 2.55E-03 | 657.2      | 810.3      | 810.9      | 834.3       | 684.8       | 719.0       | 652.8       | 539.3   | 497.8   | 534.9   | 773.7    | 447.6    | 491.2    | 430.0    | 719.0         | 497.8      | 0.7         |
| 225139_at   | —           | 3.49E-03 | 1050.5     | 998.4      | 1277.4     | 1273.6      | 951.2       | 1103.7      | 879.2       | 956.7   | 779.5   | 693.6   | 889.0    | 721.6    | 647.7    | 626.5    | 1050.5        | 721.6      | 0.7         |
| 236772_s_at | —           | 5.92E-03 | 227.7      | 173.0      | 237.4      | 346.0       | 438.3       | 343.5       | 316.2       | 231.7   | 137.2   | 132.8   | 257.0    | 260.1    | 215.8    | 147.4    | 316.2         | 215.8      | 0.7         |
| 235227_at   | —           | 8.45E-03 | 41.0       | 46.4       | 81.1       | 54.9        | 74.9        | 86.2        | 67.5        | 37.6    | 31.6    | 50.0    | 57.0     | 46.0     | 46.8     | 41.0     | 67.5          | 46.0       | 0.7         |
| 243687_at   | —           | 6.78E-03 | 172.5      | 192.0      | 197.3      | 146.8       | 115.8       | 192.4       | 150.5       | 135.7   | 156.1   | 64.8    | 89.9     | 70.2     | 125.6    | 117.6    | 172.5         | 117.6      | 0.7         |
| 235406_x_at | —           | 5.87E-03 | 1289.1     | 1438.1     | 2034.1     | 1287.6      | 1476.7      | 1599.4      | 1721.4      | 1263.2  | 1097.0  | 995.5   | 928.5    | 1005.9   | 1154.0   | 865.5    | 1476.7        | 1005.9     | 0.7         |
| 238728_at   | —           | 5.80E-03 | 61.9       | 59.5       | 78.8       | 65.1        | 74.0        | 111.2       | 80.5        | 58.6    | 41.2    | 44.8    | 50.3     | 59.9     | 51.2     | 47.0     | 74.0          | 50.3       | 0.7         |
| 238431_at   | —           | 4.66E-03 | 400.4      | 421.6      | 467.7      | 536.3       | 516.6       | 572.3       | 562.0       | 342.7   | 335.7   | 362.7   | 453.8    | 369.5    | 325.3    | 351.3    | 516.6         | 351.3      | 0.7         |
| 228487_s_at | —           | 2.09E-03 | 1818.1     | 2015.1     | 2105.8     | 2216.5      | 2175.3      | 2613.1      | 1991.7      | 1476.3  | 1302.2  | 1158.2  | 1948.2   | 1405.5   | 1500.5   | 1430.8   | 2105.8        | 1430.8     | 0.7         |
| 235630_at   | —           | 5.68E-03 | 172.5      | 207.6      | 219.8      | 261.4       | 210.9       | 233.7       | 177.1       | 179.1   | 160.7   | 114.0   | 179.4    | 85.0     | 142.0    | 91.8     | 210.9         | 142.0      | 0.7         |
| 229150_at   | —           | 6.71E-04 | 159.8      | 128.4      | 149.0      | 179.0       | 122.9       | 164.2       | 131.1       | 107.9   | 87.1    | 78.8    | 124.1    | 90.0     | 100.3    | 101.8    | 149.0         | 100.3      | 0.7         |
| 227533_at   | —           | 6.89E-03 | 46.2       | 59.6       | 58.8       | 91.7        | 69.9        | 96.4        | 66.9        | 46.1    | 40.7    | 31.6    | 78.1     | 49.8     | 45.0     | 38.3     | 66.9          | 45.0       | 0.7         |
| 238115_at   | —           | 1.73E-03 | 82.9       | 69.2       | 96.9       | 77.0        | 83.9        | 97.8        | 96.7        | 57.7    | 56.3    | 49.5    | 63.8     | 44.3     | 65.5     | 54.1     | 83.9          | 56.3       | 0.7         |
| 212812_at   | —           | 3.30E-03 | 1018.2     | 767.4      | 1354.6     | 1018.1      | 1474.1      | 1120.1      | 1461.1      | 898.6   | 604.2   | 927.0   | 788.5    | 752.2    | 671.0    | 737.4    | 1120.1        | 752.2      | 0.7         |
| 242130_at   | —           | 1.76E-03 | 102.7      | 83.7       | 105.5      | 101.0       | 109.6       | 106.0       | 101.6       | 68.9    | 66.3    | 74.8    | 86.9     | 80.7     | 62.3     | 66.6     | 102.7         | 68.9       | 0.7         |
| 227117_at   | —           | 6.78E-03 | 201.9      | 305.3      | 246.8      | 255.5       | 254.9       | 246.0       | 254.3       | 209.6   | 176.9   | 109.8   | 207.6    | 167.0    | 170.0    | 138.4    | 254.3         | 170.0      | 0.7         |
| 227052_at   | —           | 7.20E-03 | 2360.0     | 3338.2     | 3491.1     | 3104.5      | 3406.8      | 4008.7      | 3472.8      | 2329.5  | 2684.2  | 1903.5  | 2610.5   | 2274.8   | 2183.4   | 2079.1   | 3406.8        | 2274.8     | 0.7         |
| 228479_at   | —           | 7.28E-03 | 605.1      | 797.5      | 645.4      | 784.9       | 726.6       | 892.1       | 827.4       | 697.6   | 537.8   | 381.8   | 519.5    | 522.3    | 509.6    | 447.3    | 784.9         | 519.5      | 0.7         |
| 1559776_at  | —           | 5.09E-03 | 773.9      | 776.8      | 580.6      | 606.2       | 629.8       | 397.5       | 723.4       | 796.9   | 547.0   | 390.6   | 415.7    | 425.4    | 282.1    | 371.2    | 629.8         | 415.7      | 0.7         |
| 225345_s_at | —           | 3.82E-03 | 75.7       | 64.3       | 77.0       | 75.9        | 72.4        | 97.3        | 62.5        | 66.7    | 47.2    | 49.9    | 47.1     | 63.5     | 67.9     | 46.8     | 75.7          | 49.9       | 0.7         |
| 225902_at   | —           | 4.39E-03 | 770.6      | 961.8      | 1153.6     | 987.7       | 918.0       | 1190.8      | 913.3       | 790.6   | 659.9   | 561.3   | 719.6    | 575.7    | 633.7    | 612.4    | 961.8         | 633.7      | 0.7         |
| 242465_at   | —           | 1.63E-03 | 511.0      | 487.2      | 1023.1     | 610.5       | 563.1       | 1118.0      | 730.8       | 435.2   | 349.4   | 550.8   | 401.8    | 329.9    | 628.2    | 281.9    | 610.5         | 401.8      | 0.7         |
| 228548_at   | —           | 2.55E-03 | 283.9      | 323.8      | 300.8      | 329.7       | 383.1       | 354.0       | 219.6       | 277.5   | 186.3   | 139.7   | 233.3    | 213.0    | 213.8    | 150.0    | 323.8         | 213.0      | 0.7         |
| 214977_at   | —           | 5.70E-03 | 751.1      | 738.6      | 877.1      | 851.3       | 516.0       | 648.1       | 665.2       | 472.1   | 650.7   | 449.8   | 596.2    | 392.8    | 568.0    | 485.1    | 738.6         | 485.1      | 0.7         |
| 226397_s_at | —           | 4.70E-03 | 1015.8     | 1021.8     | 1440.4     | 1306.2      | 1356.6      | 1287.7      | 1670.6      | 924.6   | 848.1   | 1177.5  | 796.5    | 717.7    | 856.2    | 950.3    | 1306.2        | 856.2      | 0.7         |
| 238113_at   | —           | 5.73E-04 | 147.0      | 86.3       | 130.3      | 227.8       | 125.2       | 215.6       | 200.2       | 125.7   | 51.8    | 72.3    | 111.7    | 82.4     | 123.7    | 96.1     | 147.0         | 96.1       | 0.7         |
| 240736_at   | —           | 6.23E-03 | 63.9       | 60.7       | 74.8       | 67.4        | 60.2        | 82.7        | 60.2        | 62.9    | 35.8    | 41.2    | 57.2     | 41.7     | 60.0     | 41.4     | 63.9          | 41.7       | 0.7         |
| 236350_at   | —           | 9.76E-03 | 149.7      | 143.1      | 210.6      | 219.0       | 180.0       | 208.7       | 200.5       | 165.8   | 92.3    | 131.0   | 171.1    | 142.1    | 124.6    | 123.3    | 200.5         | 131.0      | 0.7         |
| 235352_at   | —           | 7.15E-03 | 412.5      | 505.3      | 645.4      | 515.8       | 642.9       | 824.1       | 627.7       | 428.4   | 365.8   | 370.5   | 420.1    | 409.0    | 440.0    | 281.2    | 627.7         | 409.0      | 0.7         |
| 242134_at   | —           | 2.02E-04 | 364.3      | 356.7      | 269.2      | 363.8       | 426.3       | 541.9       | 447.4       | 236.5   | 265.3   | 149.3   | 235.4    | 225.6    | 278.7    | 276.5    | 364.3         | 236.5      | 0.6         |
| 228070_at   | —           | 3.54E-03 | 127.2      | 177.1      | 200.2      | 151.5       | 184.7       | 189.7       | 181.5       | 121.1   | 113.3   | 125.8   | 128.6    | 113.8    | 117.7    | 94.4     | 181.5         | 117.7      | 0.6         |
| 227815_at   | —           | 1.93E-03 | 512.6      | 497.8      | 583.9      | 539.6       | 587.7       | 683.3       | 670.1       | 463.1   | 338.0   | 354.1   | 435.2    | 318.5    | 409.1    | 378.4    | 583.9         | 378.4      | 0.6         |
| 235805_at   | —           | 6.78E-03 | 93.2       | 107.4      | 125.1      | 112.5       | 150.6       | 132.2       | 131.2       | 75.0    | 80.9    | 80.2    | 102.8    | 101.4    | 58.2     | 95.9     | 125.1         | 80.9       | 0.6         |
| 1554597_at  | —           | 2.19E-03 | 691.3      | 743.2      | 805.6      | 899.2       | 812.0       | 910.4       | 807.7       | 653.5   | 501.5   | 513.4   | 701.7    | 501.0    | 548.0    | 522.4    | 807.7         | 522.4      | 0.6         |
| 238709_at   | —           | 6.46E-04 | 276.5      | 253.9      | 335.0      | 360.2       | 329.2       | 335.3       | 330.5       | 213.1   | 196.3   | 228.6   | 246.7    | 240.1    | 211.8    | 213.0    | 330.5         | 213.1      | 0.6         |
| 236101_at   | —           | 2.93E-03 | 153.0      | 208.2      | 150.1      | 255.8       | 215.5       | 281.1       | 180.6       | 165.3   | 133.5   | 78.3    | 156.1    | 115.8    | 143.7    | 76.8     | 208.2         | 133.5      | 0.6         |
| 213964_x_at | —           | 1.83E-03 | 329.2      | 547.4      | 527.8      | 361.3       | 469.1       | 425.7       | 333.1       | 273.0   | 343.0   | 229.5   | 293.3    | 302.6    | 209.5    | 160.6    | 425.7         | 273.0      | 0.6         |
| 1558397_at  | —           | 8.90E-04 | 1362.0     | 1648.1     | 423.4      | 1602.8      | 1193.1      | 1438.0      | 1103.1      | 1091.6  | 844.2   | 193.5   | 922.6    | 873.0    | 963.1    | 512.1    | 1362.0        | 873.0      | 0.6         |
| 244354_at   | —           | 5.29E-03 | 59.6       | 60.0       | 81.6       | 83.3        | 99.3        | 85.0        | 84.4        | 53.4    |         |         |          |          |          |          |               |            |             |

Supplementary Table S2. Continued.

| ID           | Gene Symbol | p-value  | VW3_Saline | VW6_Saline | VW7_Saline | VW13_Saline | VW22_Saline | VW23_Saline | VW25_Saline | VW3_LPS | VW6_LPS | VW7_LPS | VW13_LPS | VW22_LPS | VW23_LPS | VW25_LPS | Median_saline | Median_LPS | Fold change |
|--------------|-------------|----------|------------|------------|------------|-------------|-------------|-------------|-------------|---------|---------|---------|----------|----------|----------|----------|---------------|------------|-------------|
| 232198_at    | —           | 5.86E-03 | 81.8       | 56.1       | 84.5       | 98.0        | 88.4        | 73.2        | 83.0        | 68.2    | 52.3    | 47.2    | 69.9     | 70.7     | 38.5     | 46.2     | 83.0          | 52.3       | 0.6         |
| 229004_at    | —           | 4.96E-03 | 99.0       | 192.4      | 88.2       | 136.7       | 113.4       | 185.4       | 163.1       | 70.5    | 117.2   | 56.1    | 105.3    | 114.4    | 86.2     | 82.9     | 136.7         | 86.2       | 0.6         |
| 227116_at    | —           | 1.97E-03 | 1125.7     | 1562.6     | 1475.3     | 1089.9      | 1504.5      | 1640.8      | 1569.5      | 982.1   | 1232.1  | 828.0   | 835.1    | 850.9    | 947.7    | 951.0    | 1504.5        | 947.7      | 0.6         |
| 227082_at    | —           | 7.65E-03 | 43.4       | 43.3       | 52.7       | 66.2        | 68.5        | 79.1        | 65.0        | 40.8    | 38.8    | 28.6    | 30.1     | 42.8     | 60.5     | 41.7     | 65.0          | 40.8       | 0.6         |
| 215306_at    | —           | 6.54E-03 | 90.7       | 99.0       | 115.6      | 130.8       | 170.9       | 185.3       | 88.3        | 87.5    | 83.8    | 49.1    | 72.5     | 36.3     | 81.4     | 34.6     | 115.6         | 72.5       | 0.6         |
| 227630_at    | —           | 8.52E-03 | 711.5      | 903.2      | 1000.0     | 875.1       | 971.4       | 1023.9      | 883.4       | 815.8   | 653.1   | 508.2   | 680.6    | 564.6    | 555.8    | 485.2    | 903.2         | 564.6      | 0.6         |
| 227665_at    | —           | 7.65E-03 | 168.8      | 205.8      | 191.4      | 178.5       | 200.8       | 239.7       | 200.4       | 160.1   | 120.6   | 105.4   | 180.0    | 124.5    | 155.5    | 104.9    | 200.4         | 124.5      | 0.6         |
| 229214_at    | —           | 1.08E-03 | 344.3      | 370.7      | 387.9      | 352.2       | 327.8       | 316.6       | 340.5       | 252.4   | 203.7   | 213.5   | 301.5    | 213.7    | 205.8    | 235.1    | 344.3         | 213.7      | 0.6         |
| 240397_x_at  | —           | 4.20E-03 | 103.7      | 111.4      | 100.3      | 141.2       | 78.4        | 95.0        | 135.0       | 107.5   | 81.4    | 57.4    | 84.0     | 31.0     | 58.6     | 64.4     | 103.7         | 64.4       | 0.6         |
| 237186_at    | —           | 7.30E-03 | 101.2      | 56.0       | 80.0       | 43.5        | 64.5        | 54.7        | 92.0        | 79.2    | 41.5    | 39.7    | 30.6     | 64.1     | 33.8     | 39.9     | 64.5          | 39.9       | 0.6         |
| 220033_at    | —           | 3.17E-03 | 65.2       | 68.6       | 103.6      | 85.7        | 100.2       | 83.6        | 77.5        | 69.3    | 42.9    | 46.6    | 52.7     | 54.1     | 51.3     | 48.1     | 83.6          | 51.3       | 0.6         |
| 236488_s_at  | —           | 3.46E-03 | 818.0      | 783.0      | 837.6      | 1159.7      | 982.6       | 1378.4      | 1225.6      | 733.4   | 514.5   | 449.7   | 1005.0   | 599.5    | 672.3    | 539.1    | 982.6         | 599.5      | 0.6         |
| 214807_at    | —           | 6.12E-04 | 4250.3     | 4266.0     | 3657.9     | 4350.7      | 4648.5      | 4939.9      | 4693.7      | 3502.5  | 2588.0  | 1537.7  | 2825.2   | 2653.8   | 2640.7   | 2148.6   | 4350.7        | 2640.7     | 0.6         |
| 243417_at    | —           | 3.37E-03 | 89.2       | 94.8       | 116.3      | 99.2        | 89.1        | 94.7        | 94.0        | 78.5    | 56.8    | 47.7    | 80.5     | 57.2     | 58.5     | 39.3     | 94.7          | 57.2       | 0.6         |
| 238379_x_at  | —           | 2.87E-03 | 81.9       | 85.4       | 105.4      | 125.9       | 152.2       | 148.8       | 141.8       | 88.4    | 40.9    | 44.7    | 86.3     | 76.0     | 79.8     | 56.8     | 125.9         | 76.0       | 0.6         |
| 230085_at    | —           | 3.83E-03 | 116.2      | 109.3      | 136.1      | 118.8       | 136.8       | 141.6       | 170.1       | 97.7    | 73.7    | 46.7    | 82.0     | 94.7     | 84.8     | 64.1     | 136.1         | 82.0       | 0.6         |
| 244375_at    | —           | 1.45E-03 | 174.3      | 106.1      | 216.7      | 240.5       | 120.1       | 171.3       | 148.5       | 145.7   | 86.5    | 156.1   | 158.4    | 69.1     | 103.1    | 95.6     | 171.3         | 103.1      | 0.6         |
| 228275_at    | —           | 8.12E-03 | 158.9      | 190.2      | 187.1      | 157.7       | 143.6       | 211.4       | 147.5       | 146.8   | 140.9   | 85.9    | 152.2    | 88.3     | 95.6     | 74.6     | 158.9         | 95.6       | 0.6         |
| 239355_at    | —           | 9.47E-03 | 277.0      | 287.1      | 405.3      | 336.9       | 354.7       | 453.6       | 293.6       | 314.6   | 201.3   | 173.9   | 260.9    | 222.9    | 202.2    | 163.1    | 336.9         | 202.2      | 0.6         |
| 228006_at    | —           | 1.48E-03 | 539.3      | 633.5      | 715.8      | 629.4       | 675.8       | 758.9       | 655.0       | 459.4   | 390.4   | 353.0   | 511.0    | 375.6    | 391.5    | 413.6    | 655.0         | 391.5      | 0.6         |
| 227432_s_at  | —           | 4.24E-04 | 1672.3     | 2084.0     | 2170.5     | 1963.5      | 1983.0      | 2494.6      | 1369.0      | 1264.3  | 1433.3  | 889.0   | 1062.2   | 1184.0   | 1321.3   | 782.4    | 1983.0        | 1184.0     | 0.6         |
| 238700_at    | —           | 1.60E-03 | 486.8      | 584.6      | 809.5      | 651.5       | 614.2       | 871.3       | 661.7       | 394.9   | 345.7   | 318.7   | 499.2    | 388.7    | 418.4    | 272.3    | 651.5         | 388.7      | 0.6         |
| 1562848_at   | —           | 6.90E-03 | 103.6      | 150.5      | 139.8      | 137.9       | 167.8       | 125.7       | 99.4        | 119.1   | 82.1    | 59.4    | 98.9     | 94.5     | 75.9     | 64.4     | 137.9         | 82.1       | 0.6         |
| 243781_at    | —           | 6.60E-03 | 95.4       | 134.4      | 198.6      | 161.5       | 164.7       | 169.7       | 178.9       | 99.1    | 96.6    | 87.9    | 99.3     | 113.8    | 97.8     | 62.7     | 164.7         | 97.8       | 0.6         |
| 242951_at    | —           | 8.95E-04 | 420.9      | 589.9      | 446.5      | 426.5       | 555.6       | 469.8       | 285.5       | 312.7   | 264.7   | 124.0   | 277.6    | 329.6    | 171.4    | 122.7    | 446.5         | 264.7      | 0.6         |
| 1560625_s_at | —           | 2.93E-03 | 638.9      | 782.6      | 607.1      | 652.0       | 603.4       | 900.4       | 702.3       | 604.1   | 386.5   | 205.9   | 355.0    | 439.8    | 551.4    | 288.8    | 652.0         | 386.5      | 0.6         |
| 238378_at    | —           | 5.44E-03 | 120.3      | 134.9      | 170.2      | 157.2       | 170.8       | 186.9       | 172.2       | 114.0   | 66.0    | 51.8    | 131.6    | 105.9    | 100.6    | 65.9     | 170.2         | 100.6      | 0.6         |
| 230313_at    | —           | 1.41E-03 | 1313.8     | 1491.0     | 1421.5     | 1583.1      | 1234.9      | 1626.7      | 1125.9      | 928.3   | 808.1   | 437.5   | 840.0    | 906.0    | 1074.2   | 509.2    | 1421.5        | 840.0      | 0.6         |
| 226910_at    | —           | 4.60E-03 | 588.1      | 672.5      | 785.7      | 799.7       | 821.2       | 770.2       | 850.1       | 573.3   | 464.3   | 343.7   | 646.0    | 520.0    | 405.3    | 413.7    | 785.7         | 464.3      | 0.6         |
| 225328_at    | —           | 9.07E-03 | 66.0       | 87.2       | 74.7       | 57.6        | 64.2        | 93.9        | 48.4        | 52.2    | 54.2    | 38.9    | 62.1     | 38.4     | 35.2     | 33.1     | 66.0          | 38.9       | 0.6         |
| 232331_at    | —           | 5.93E-04 | 410.9      | 391.7      | 444.2      | 487.7       | 434.0       | 565.7       | 413.5       | 347.4   | 252.7   | 209.1   | 282.9    | 255.7    | 328.9    | 188.8    | 434.0         | 255.7      | 0.6         |
| 236660_at    | —           | 1.36E-03 | 61.9       | 75.0       | 93.7       | 61.1        | 73.6        | 76.0        | 77.2        | 60.2    | 44.2    | 48.9    | 29.1     | 44.4     | 31.9     | 31.7     | 75.0          | 44.2       | 0.6         |
| 226832_at    | —           | 4.02E-03 | 503.5      | 680.0      | 659.1      | 616.0       | 674.5       | 820.6       | 725.5       | 502.6   | 402.4   | 306.3   | 532.7    | 340.4    | 396.2    | 350.3    | 674.5         | 396.2      | 0.6         |
| 1570375_at   | —           | 7.02E-03 | 96.1       | 127.0      | 186.6      | 216.8       | 180.8       | 180.6       | 129.2       | 105.8   | 67.5    | 57.2    | 121.9    | 119.3    | 109.3    | 77.3     | 180.6         | 105.8      | 0.6         |
| 229383_at    | —           | 4.87E-03 | 621.6      | 753.9      | 988.6      | 985.1       | 1034.7      | 1118.2      | 937.1       | 579.5   | 578.6   | 368.7   | 751.7    | 572.0    | 430.9    | 407.9    | 985.1         | 572.0      | 0.6         |
| 1560169_at   | —           | 5.94E-03 | 225.0      | 240.7      | 218.2      | 260.8       | 181.4       | 214.7       | 171.1       | 227.1   | 115.4   | 95.4    | 190.7    | 125.0    | 161.6    | 91.2     | 218.2         | 125.0      | 0.6         |
| 235761_at    | —           | 5.00E-04 | 167.9      | 132.1      | 285.4      | 212.3       | 305.7       | 281.4       | 462.9       | 126.7   | 77.2    | 187.8   | 140.7    | 212.0    | 161.0    | 214.4    | 281.4         | 161.0      | 0.6         |
| 1561705_at   | —           | 9.95E-04 | 295.8      | 419.7      | 526.1      | 485.3       | 460.4       | 608.1       | 477.0       | 254.0   | 257.9   | 324.4   | 382.0    | 272.2    | 361.7    | 270.3    | 477.0         | 272.2      | 0.6         |
| 244368_x_at  | —           | 4.11E-03 | 186.4      | 242.8      | 310.3      | 291.9       | 288.9       | 366.3       | 331.5       | 175.9   | 166.5   | 150.0   | 252.5    | 146.8    | 173.8    | 149.5    | 291.9         | 166.5      | 0.6         |
| 225716_at    | —           | 3.04E-03 | 242.7      | 278.1      | 280.9      | 287.7       | 326.4       | 322.5       | 250.6       | 223.3   | 159.4   | 74.7    | 203.0    | 170.9    | 140.4    | 97.2     | 280.9         | 159.4      | 0.6         |
| 240856_at    | —           | 4.00E-03 | 688.7      | 1468.0     | 715.0      | 673.7       | 585.8       | 1101.4      | 710.4       | 581.3   | 680.7   | 77.8    | 399.9    | 204.0    | 445.7    | 156.6    | 710.4         | 399.9      | 0.6         |
| 1554007_at   | —           | 8.80E-03 | 41.0       | 48.8       | 88.0       | 59.7        | 112.4       | 143.6       | 69.9        | 39.3    | 42.3    | 29.2    | 48.8     | 39.1     | 43.4     | 25.9     | 69.9          | 39.3       | 0.6         |
| 236297_at    | —           | 2.09E-03 | 819.3      | 791.8      | 895.9      | 985.1       | 1399.8      | 1304.9      | 1212.9      | 821.6   | 492.2   | 388.6   | 649.7    | 577.9    | 554.1    | 514.2    | 985.1         | 554.1      | 0.6         |
| 230894_s_at  | —           | 1.94E-03 | 211.6      | 330.0      | 352.5      | 321.2       | 322.4       | 344.6       | 246.4       | 186.6   | 244.2   | 135.6   | 186.0    | 180.7    | 139.0    | 140.9    | 322.4         | 180.7      | 0.6         |
| 233176_at    | —           | 5.73E-03 | 119.7      | 108.2      | 192.2      | 201.0       | 131.0       | 137.5       | 155.1       | 99.7    | 63.7    | 38.9    | 81.6     | 103.1    | 76.8     | 70.4     | 137.5         | 76.8       | 0.6         |
| 244652_at    | —           | 2.13E-03 | 246.2      | 408.6      | 334.7      | 441.5       | 287.7       | 537.6       | 318.4       | 243.5   | 213.3   | 110.0   | 280.1    | 153.3    | 187.0    | 137.5    | 334.7         | 187.0      | 0.6         |
| 1569346_a_at | —           | 6.92E-04 | 260.0      | 240.2      | 280.0      | 260.8       | 221.9       | 289.9       | 312.4       | 211.7   | 123.3   | 145.5   | 183.4    | 141.6    | 159.4    | 135.3    | 260.8         | 145.5      | 0.6         |
| 239236_at    | —           | 6.07E-03 | 99.6       | 142.7      | 182.4      | 131.9       | 183.9       | 207.9       | 171.8       | 95.0    | 95.7    | 99.2    | 124.9    | 84.2     | 95.8     | 83.6     | 171.8         | 95.7       | 0.6         |
| 229934_at    | —           | 6.72E-03 | 438.1      | 927.7      | 831.9      | 1073.2      | 743.7       | 1065.6      | 885.3       | 478.2   | 575.5   | 407.8   | 862.9    | 490.9    | 530.5    | 414.0    | 885.3         | 490.9      | 0.6         |
| 229327_s_at  | —           | 3.11E-03 | 1823.5     | 1622.1     | 1870.9     | 1476.1      | 1613.5      | 1343.4      | 1169.1      | 1298.0  | 867.6   | 509.1   | 892.7    | 1125.5   | 966.0    | 644.0    | 1613.5        | 892.7      | 0.6         |
| 238455_at    | —           | 2.11E-04 | 729.1      | 645.7      | 879.6      | 1110.3      | 990.2       | 1173.2      | 1209.5      | 545.5   | 384.4   | 421.7   | 610.1    | 556.1    | 553.1    | 483.1    | 990.2         | 545.5      | 0.6         |
| 238668_at    | —           | 4.53E-03 | 391.1      | 502.5      | 591.2      | 613.9       | 624.4       | 656.3       | 655.3       | 337.2   | 405.8   | 289.3   | 539.2    | 352.9    | 327.3    | 324.7    | 613.9         | 337.2      | 0.5         |
| 240432_x_at  | —           | 5.15E-03 | 318.8      | 353.0      | 392.9      | 470.6       | 568.3       | 528.7       | 477.5       | 327.7   | 270.9   | 182.7   | 346.0    | 257.9    | 221.3    | 242.9    | 470.6         | 257.9      | 0.5         |
| 239050_s_at  | —           | 2.57E-03 | 170.4      | 172.4      | 219.7      | 282.7       | 268.2       | 275.9       | 319.8       | 151.8   | 113.8   | 154.4   | 210.5    | 142.4    | 145.8    | 136.0    | 268.2         | 145.8      | 0.5         |
| 240690_at    | —           | 2.60E-03 | 78.1       | 110.7      | 118.6      | 123.5       | 118.5       | 135.3       | 139.9       | 63.1    | 61.4    | 64.4    | 120.7    | 63.0     | 64.5     | 71.4     | 118.6         | 64.4       | 0.5         |
| 215287_at    | —           | 7.53E-03 | 53.7       | 55.3       | 92.1       | 87.9        | 95.7        | 81.8        | 104.3       | 47.3    | 37.7    | 45.1    | 79.2     | 56.0     | 65.8     | 47.1     | 87.9          | 47.3       | 0.5         |
| 225176_at    | —           | 3.95E-03 | 1162.6     | 1574.3     | 1577.6     | 1364.3      | 1623.8      | 1741.4      | 1530.3      | 1155.1  | 942.3   | 610.3   | 1133.0   | 770.6    | 837.8    | 662.8    | 1574.3        | 837.8      | 0.5         |
| 235385_at    | —           | 6.35E-03 | 407.2      | 540.8      | 837.0      | 708.7       | 768.4       | 760.8       | 690.4       | 394.0   | 375.7   | 277.9   | 584.8    | 429.2    | 368.0    | 270.7    | 708.7         | 375.7      | 0.5         |
| 226280_at    | —           | 6.12E-04 | 1177.4     | 1431.8     | 1523.4     | 1531.6      | 1623.6      | 1681.7      | 1577.2      | 986.4   | 809.2   | 676.0   | 1053.0   | 914.2    | 804.5    | 757.9    | 1531.6        | 809.2      | 0.5         |
| 241417_at    | —           | 3.45E-04 | 163.7      | 215.5      | 146.7      | 201.1       | 209.1       | 192.5       | 132.1       | 128.4   | 101.6   | 94.1    | 108.2    | 91.0     | 117.3    |          |               |            |             |

TRANSCRIPTION PROFILES IN ALVEOLAR MACROPHAGES

Supplementary Table S2. Continued.

| ID           | Gene Symbol | p-value  | VW3_Saline | VW6_Saline | VW7_Saline | VW13_Saline | VW22_Saline | VW23_Saline | VW25_Saline | VW3_LPS | VW6_LPS | VW7_LPS | VW13_LPS | VW22_LPS | VW23_LPS | VW25_LPS | Median_saline | Median_LPS | Fold change |
|--------------|-------------|----------|------------|------------|------------|-------------|-------------|-------------|-------------|---------|---------|---------|----------|----------|----------|----------|---------------|------------|-------------|
| 227929_at    | —           | 8.22E-03 | 73.5       | 114.2      | 211.7      | 167.1       | 166.0       | 254.7       | 203.6       | 85.7    | 87.8    | 53.8    | 90.6     | 85.0     | 86.1     | 56.7     | 167.1         | 85.7       | 0.5         |
| 226865_at    | —           | 6.10E-04 | 1126.0     | 1143.8     | 1372.5     | 1510.8      | 1521.6      | 1479.3      | 1679.2      | 889.2   | 625.8   | 509.1   | 958.2    | 762.1    | 734.7    | 588.4    | 1479.3        | 734.7      | 0.5         |
| 1554609_at   | —           | 8.85E-03 | 143.5      | 211.6      | 295.9      | 223.8       | 227.3       | 350.7       | 214.3       | 149.9   | 139.0   | 61.7    | 169.1    | 110.7    | 107.2    | 49.8     | 223.8         | 110.7      | 0.5         |
| 244551_at    | —           | 4.81E-03 | 28.4       | 44.5       | 64.4       | 49.3        | 67.5        | 83.0        | 59.4        | 29.2    | 24.7    | 29.7    | 38.7     | 39.0     | 29.3     | 21.7     | 59.4          | 29.3       | 0.5         |
| 241359_at    | —           | 2.04E-03 | 455.6      | 615.5      | 189.5      | 162.3       | 354.6       | 541.1       | 386.6       | 450.1   | 362.6   | 71.2    | 105.5    | 190.1    | 284.9    | 174.1    | 386.6         | 190.1      | 0.5         |
| 242714_at    | —           | 1.44E-03 | 609.6      | 805.9      | 1050.9     | 985.2       | 929.0       | 1440.3      | 787.1       | 497.9   | 459.0   | 320.2   | 582.5    | 455.0    | 441.8    | 201.1    | 929.0         | 455.0      | 0.5         |
| 228175_at    | —           | 3.50E-04 | 341.5      | 408.4      | 266.5      | 241.3       | 281.4       | 377.4       | 256.2       | 216.8   | 256.0   | 74.7    | 126.9    | 136.8    | 193.5    | 110.0    | 281.4         | 136.8      | 0.5         |
| 242868_at    | —           | 1.22E-03 | 75.4       | 73.1       | 131.6      | 123.8       | 114.8       | 125.7       | 87.3        | 67.8    | 52.2    | 57.7    | 71.1     | 55.0     | 55.6     | 48.9     | 114.8         | 55.6       | 0.5         |
| 230178_s_at  | —           | 1.02E-03 | 210.5      | 236.6      | 393.2      | 305.0       | 339.6       | 297.8       | 299.5       | 172.2   | 139.4   | 144.9   | 207.6    | 152.8    | 143.2    | 103.8    | 299.5         | 144.9      | 0.5         |
| 226134_s_at  | —           | 5.19E-03 | 42.6       | 48.1       | 99.7       | 107.4       | 125.8       | 114.8       | 98.9        | 47.5    | 36.4    | 40.6    | 64.2     | 57.8     | 47.7     | 34.5     | 99.7          | 47.5       | 0.5         |
| 227995_at    | —           | 8.88E-04 | 396.0      | 465.6      | 480.2      | 553.6       | 539.0       | 558.6       | 635.8       | 329.6   | 220.6   | 164.3   | 330.1    | 250.7    | 261.6    | 175.9    | 539.0         | 250.7      | 0.5         |
| 235109_at    | —           | 3.95E-03 | 129.6      | 128.0      | 220.9      | 199.2       | 179.0       | 171.5       | 153.8       | 132.6   | 79.5    | 65.8    | 122.0    | 106.8    | 67.2     | 56.3     | 171.5         | 79.5       | 0.5         |
| 232828_at    | —           | 3.01E-03 | 176.8      | 383.2      | 547.1      | 356.3       | 315.0       | 468.7       | 166.7       | 162.5   | 189.3   | 84.2    | 179.4    | 121.5    | 165.8    | 77.9     | 356.3         | 162.5      | 0.5         |
| 1558742_at   | —           | 4.34E-03 | 107.4      | 149.2      | 244.7      | 180.5       | 152.0       | 170.6       | 183.8       | 113.7   | 75.5    | 92.1    | 126.3    | 77.5     | 45.5     | 54.4     | 170.6         | 77.5       | 0.5         |
| 228959_at    | —           | 8.86E-04 | 405.9      | 551.9      | 426.9      | 348.6       | 481.0       | 520.8       | 484.2       | 333.0   | 277.9   | 127.1   | 215.2    | 261.2    | 201.9    | 196.2    | 481.0         | 215.2      | 0.4         |
| 243495_s_at  | —           | 1.95E-03 | 384.8      | 839.1      | 977.7      | 934.3       | 1010.4      | 911.5       | 732.3       | 330.0   | 563.0   | 379.9   | 709.9    | 484.8    | 406.8    | 401.8    | 911.5         | 406.8      | 0.4         |
| 240173_at    | —           | 1.78E-03 | 291.0      | 365.2      | 457.9      | 462.4       | 451.1       | 456.0       | 660.4       | 266.6   | 186.3   | 183.3   | 265.9    | 198.2    | 256.6    | 174.5    | 456.0         | 198.2      | 0.4         |
| 228560_at    | —           | 2.49E-04 | 680.8      | 432.5      | 618.2      | 535.6       | 642.9       | 375.3       | 307.8       | 464.2   | 232.0   | 180.2   | 253.6    | 257.0    | 201.9    | 106.9    | 535.6         | 232.0      | 0.4         |
| 1557275_a_at | —           | 1.53E-03 | 2806.9     | 3444.3     | 1036.7     | 677.9       | 1809.1      | 2376.4      | 1726.2      | 2315.5  | 1951.0  | 388.2   | 442.4    | 758.5    | 1715.7   | 750.1    | 1809.1        | 758.5      | 0.4         |
| 232081_at    | —           | 2.89E-03 | 892.0      | 1041.0     | 815.0      | 678.4       | 936.1       | 882.4       | 904.8       | 877.4   | 356.9   | 157.2   | 411.3    | 454.1    | 329.7    | 208.9    | 892.0         | 356.9      | 0.4         |
| 241652_x_at  | —           | 4.42E-03 | 64.9       | 79.5       | 196.9      | 194.5       | 170.6       | 270.0       | 218.7       | 65.3    | 64.9    | 66.6    | 97.3     | 58.4     | 64.9     | 59.5     | 194.5         | 64.9       | 0.3         |
